# Supplementary material
Source: PubMed Central journal article supplement (PMC7206125)
Supplement: 42003_2020_941_MOESM1_ESM.pdf [file 42003_2020_941_MOESM1_ESM.pdf]

# 1 Supplementary Figures

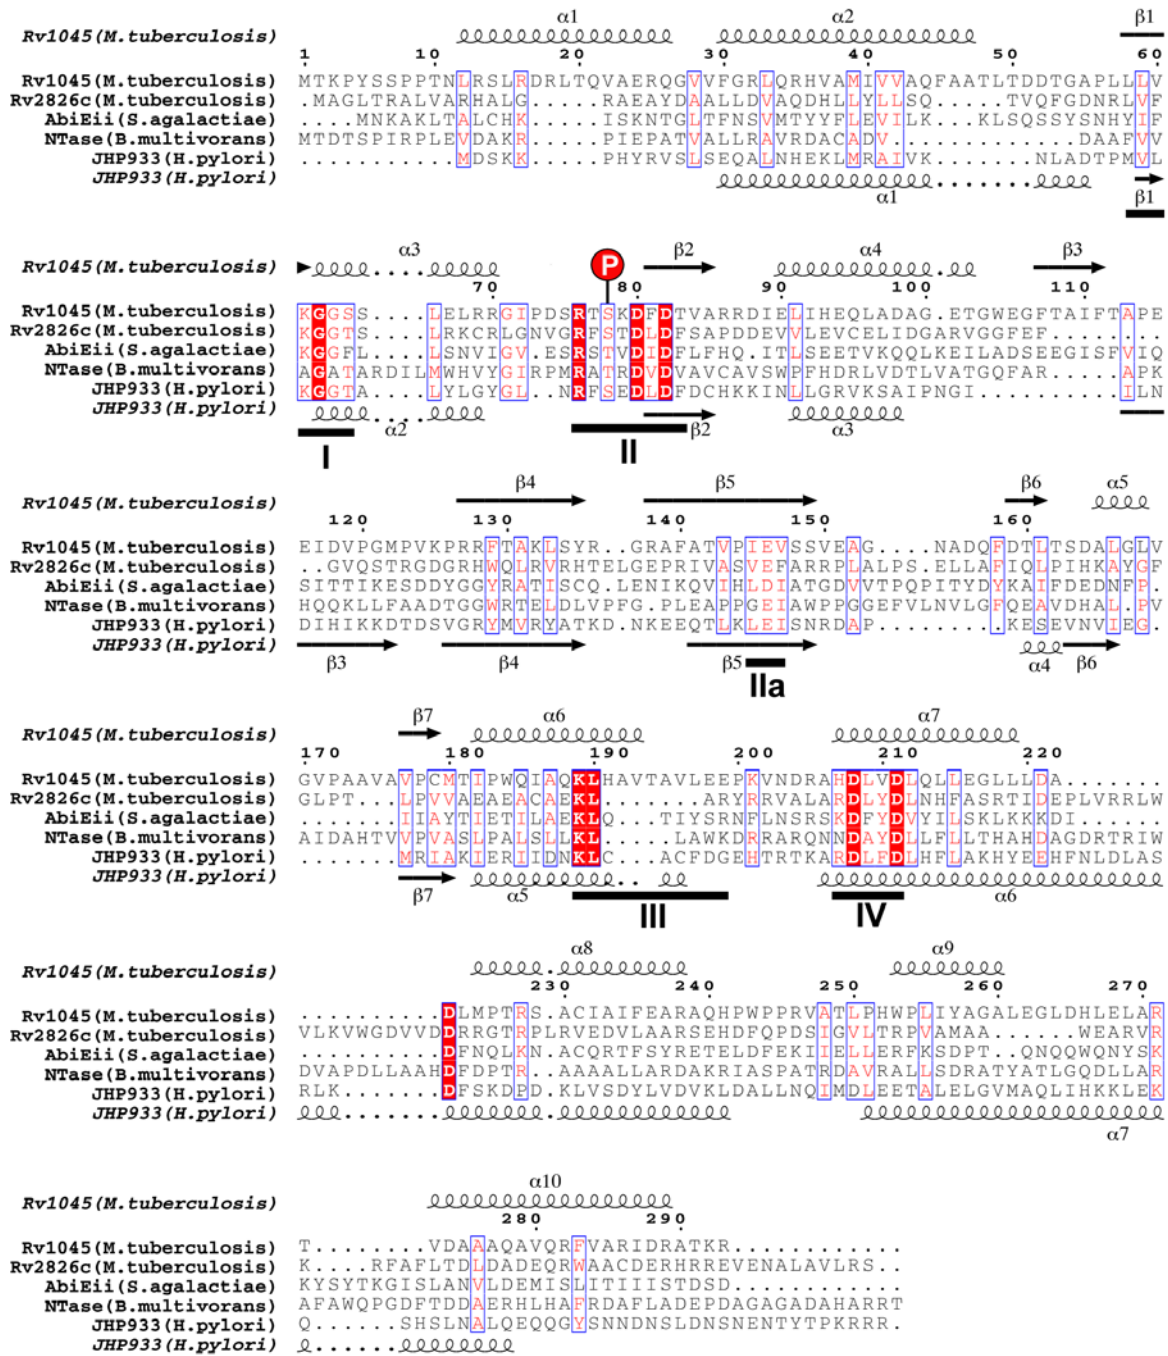

2  
3 **Supplementary Figure 1 Structure-based multiple sequence alignment of**  
4 **DUF1814 family**  
5 Sequences of DUF1814 family members Rv1045, Rv2826c from *M. tuberculosis*,  
6 AbiEii from *S. agalactiae*, NTase from *B. multivorans*, and JHP933 from *H. pylori*  
7 were aligned by software MUSCLE; and annotated secondary structure elements of

8 TglT (Rv1045) and JHP933 were aligned to the top and the bottom of the sequences  
9 using ESPript server. Residues in red indicate the conserved residues; residues with  
10 red background indicated the invariant residues. Conserved motifs are indicated at the  
11 bottom of the sequences. The phosphorylation target S78 of TglT is highlighted by a  
12 phosphate symbol with red background.

13

14

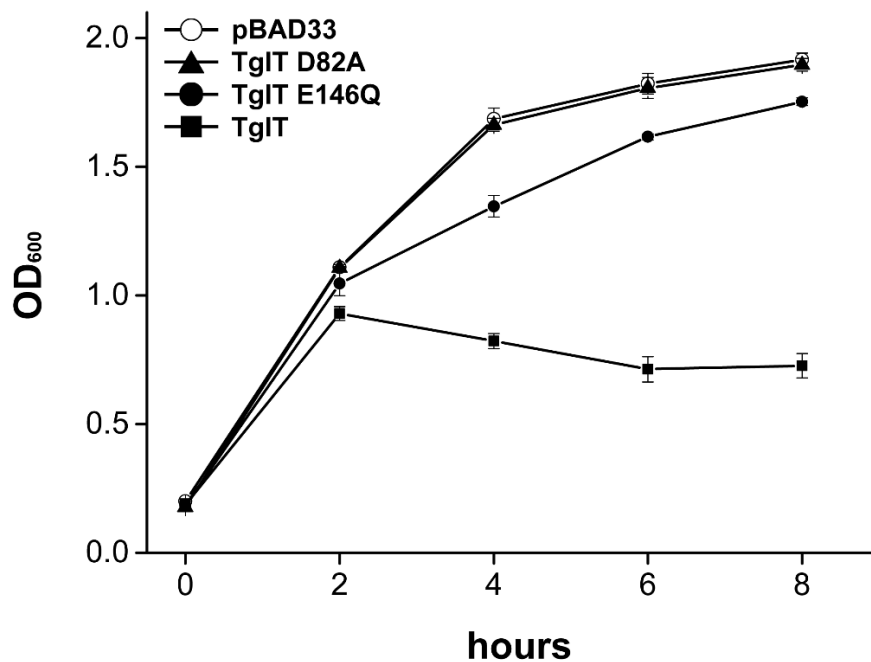

15

16 **Supplementary Figure 2 Initial growth rates of BL21 cells after the induction of**  
 17 **expression of TgIT and variants.**

18 BL21 competent cells were transformed with the indicated expression plasmids. The  
 19 bacteria cultures were grown to  $OD_{600}=0.6$  and then diluted to  $OD_{600}=0.2$  before adding  
 20 L-arabinose for induction. The growth of the bacteria culture was monitored every two  
 21 hours after induction. Bacteria densities ( $OD_{600}$ ) was plotted as the function of time. At  
 22 least three independent measurements were taken for each time point. Bacteria  
 23 transformed with TgIT expression plasmid exhibited growth inhibition 2 hours post  
 24 induction. E146Q mutant showed attenuated toxicity comparing to wildtype protein,  
 25 whereas D82A was completely non-toxic. Data shown are mean  $OD_{600}$  value  $\pm$  SD  
 26 ( $n = 3$ ).

27

28

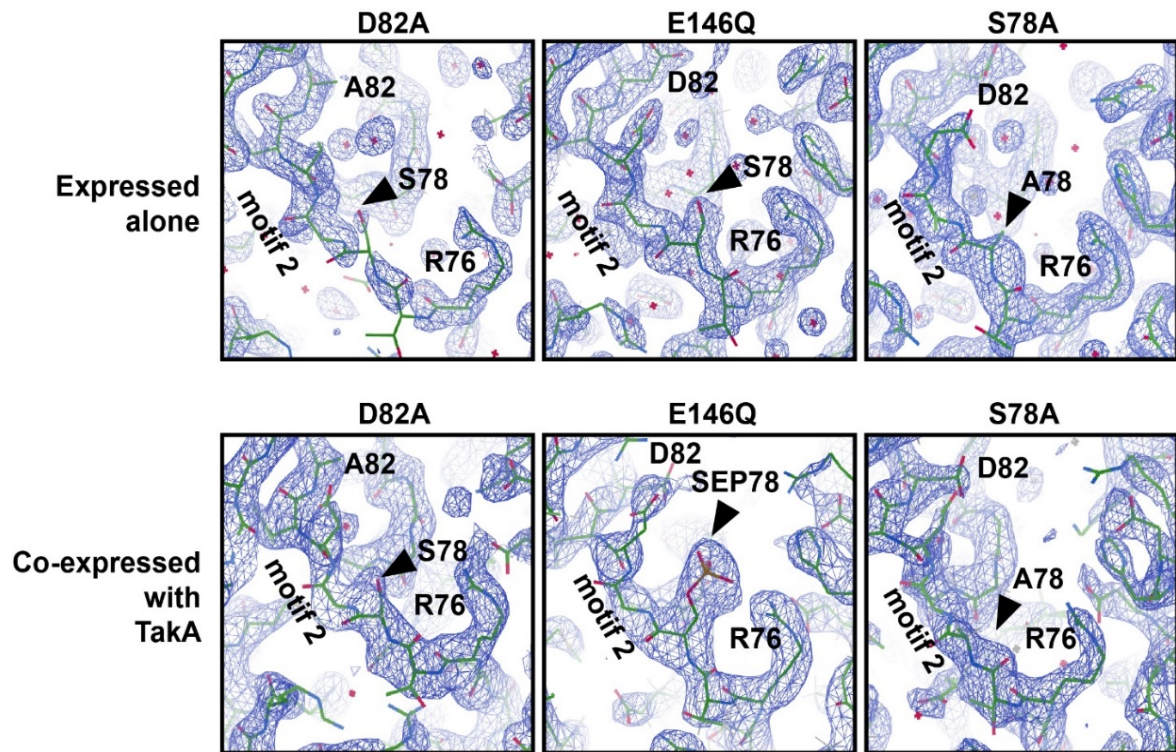

29

30 **Supplementary Figure 3 Crystallographic study of TglT variants revealed that**  
 31 **residue S78 was phosphorylated when the protein was co-expressed with the**  
 32 **antitoxin TakA.**

33 Composite omit maps (with annealing) were calculated for crystal structures of TglT  
 34 mutants D82A, E146Q and S78A. The black boxes show the magnified view of the  
 35 phosphorylation at the active site of TglT variants. The map (contour 1.5  $\sigma$ ) is shown  
 36 with blue mesh, which is superimposed with the stick model of the protein. Key residues  
 37 at the active site are labeled. The phosphorylation target residue 78 is indicated with  
 38 black triangles.

39

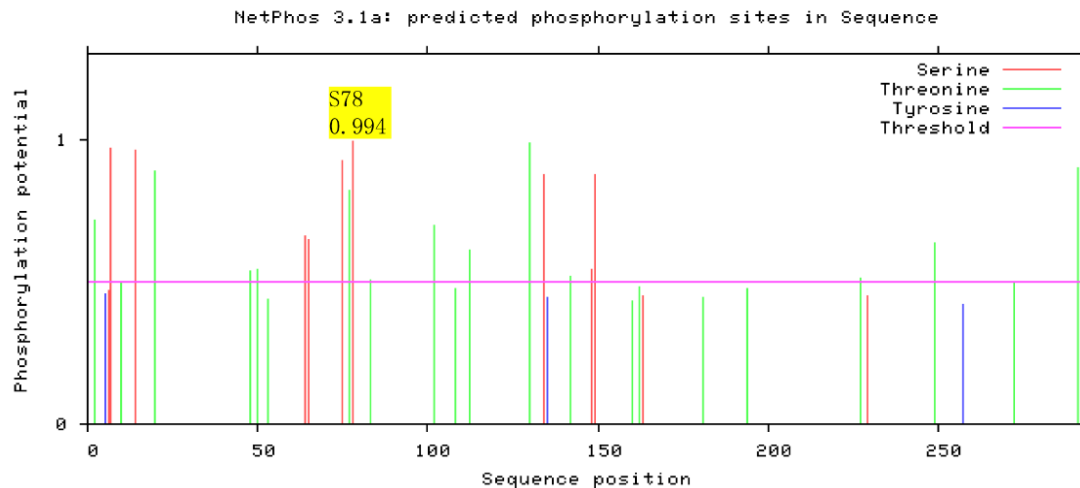

|            |      |           |       |         |     |
|------------|------|-----------|-------|---------|-----|
| # Sequence | 78 S | DSRTSKDFD | 0.994 | unsp    | YES |
| # Sequence | 78 S | DSRTSKDFD | 0.496 | cdc2    | .   |
| # Sequence | 78 S | DSRTSKDFD | 0.479 | RSK     | .   |
| # Sequence | 78 S | DSRTSKDFD | 0.443 | CaM-II  | .   |
| # Sequence | 78 S | DSRTSKDFD | 0.439 | PKA     | .   |
| # Sequence | 78 S | DSRTSKDFD | 0.435 | GSK3    | .   |
| # Sequence | 78 S | DSRTSKDFD | 0.397 | CKII    | .   |
| # Sequence | 78 S | DSRTSKDFD | 0.387 | CKI     | .   |
| # Sequence | 78 S | DSRTSKDFD | 0.358 | DNAPK   | .   |
| # Sequence | 78 S | DSRTSKDFD | 0.335 | p38MAPK | .   |
| # Sequence | 78 S | DSRTSKDFD | 0.299 | PKG     | .   |
| # Sequence | 78 S | DSRTSKDFD | 0.294 | ATM     | .   |
| # Sequence | 78 S | DSRTSKDFD | 0.251 | PKC     | .   |
| # Sequence | 78 S | DSRTSKDFD | 0.177 | cdk5    | .   |
| # Sequence | 78 S | DSRTSKDFD | 0.087 | PKB     | .   |

#### 41 **Supplementary Figure 4 NetPhos 3.1 prediction**

42 Prediction of phosphorylation site in TgIT sequence generated from NetPhos 3.1 server.

43 The score of the prediction ranges from 0-1; score higher than threshold 0.5 indicates a

44 significant prediction. S78 from motif 2 in context  ${}_{74}$ -DSRTSKDFD- ${}_{82}$  received the

45 highest score 0.994 among all significant hits. The software found that S78 is the

46 phosphorylation site for unspecified kinase, rather than any of 14 characterized kinases

47 whose scores were all below significant threshold.

48

*(MATRIX)*  
*(SCIENCE)* Mascot Search Results

Peptide View

MS/MS Fragmentation of **GIPDSRTSKDFDTVAR**

Found in [tr|A0A045JBD4|A0A045JBD4\\_MYCTX](#), Nucleotidyl transferase of uncharacterised function (DUF1814) OS=Mycobacterium tuberculosis GN=B7R63\_05680 PE=4 SV=1

Match to Query 8929: 1843.838096 from(461.966800,4+) intensity(19859188.0000)

Title: File43610 Spectrum1939 scans: 4176

Data file F:\DATA\2017\201712\20171214\BPI\_14819\_RV1054-raw.mgf

Click mouse within plot area to zoom in by factor of two about that point

Or, Plot from  to  Da

Label all possible matches  Label matches used for scoring

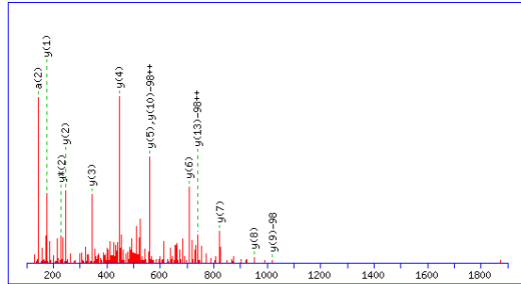

Monoisotopic mass of neutral peptide Mr(calc): 1843.8466

Fixed modifications: Carbamidomethyl (C) (apply to specified residues or termini only)

Variable modifications:

S78 : Phospho (ST), with neutral losses 97.9769 (shown in table), 0.0000

Ions Score: 71 Expect: 5.1e-007

Matches : 13/252 fragment ions using 18 most intense peaks (help)

| #  | a               | a <sup>++</sup> | a <sup>+</sup> | a <sup>+++</sup> | b         | b <sup>++</sup> | b <sup>+</sup> | b <sup>+++</sup> | Seq. | y                | y <sup>++</sup> | y <sup>+</sup>  | y <sup>+++</sup> | #  |
|----|-----------------|-----------------|----------------|------------------|-----------|-----------------|----------------|------------------|------|------------------|-----------------|-----------------|------------------|----|
| 1  | 30.0338         | 15.5206         |                |                  | 58.0287   | 29.5180         |                |                  | G    |                  |                 |                 |                  | 16 |
| 2  | <u>143.1179</u> | 72.0626         |                |                  | 171.1128  | 86.0600         |                |                  | I    | 1689.8555        | 845.4314        | 1672.8289       | 836.9181         | 15 |
| 3  | 240.1707        | 120.5890        |                |                  | 268.1656  | 134.5864        |                |                  | P    | 1576.7714        | 788.8893        | 1559.7449       | 780.3761         | 14 |
| 4  | 355.1976        | 178.1024        |                |                  | 383.1925  | 192.0999        |                |                  | D    | 1479.7186        | <u>740.3630</u> | 1462.6921       | 731.8497         | 13 |
| 5  | 442.2296        | 221.6185        |                |                  | 470.2245  | 235.6159        |                |                  | S    | 1364.6917        | 682.8495        | 1347.6652       | 674.3362         | 12 |
| 6  | 598.3307        | 299.6690        | 581.3042       | 291.1557         | 626.3257  | 313.6665        | 609.2991       | 305.1532         | R    | 1277.6597        | 639.3335        | 1260.6331       | 630.8202         | 11 |
| 7  | 699.3784        | 350.1928        | 682.3519       | 341.6796         | 727.3733  | 364.1903        | 710.3468       | 355.6770         | T    | 1121.5586        | <u>561.2829</u> | 1104.5320       | 552.7696         | 10 |
| 8  | 768.3999        | 384.7036        | 751.3733       | 376.1903         | 796.3948  | 398.7010        | 779.3682       | 390.1878         | S    | <u>1020.5109</u> | 510.7591        | 1003.4843       | 502.2458         | 9  |
| 9  | 896.4948        | 448.7511        | 879.4683       | 440.2378         | 924.4898  | 462.7485        | 907.4632       | 454.2352         | K    | <u>951.4894</u>  | 476.2483        | 934.4629        | 467.7351         | 8  |
| 10 | 1011.5218       | 506.2645        | 994.4952       | 497.7513         | 1039.5167 | 520.2620        | 1022.4901      | 511.7487         | D    | <u>823.3945</u>  | 412.2009        | 806.3679        | 403.6876         | 7  |
| 11 | 1158.5902       | 579.7987        | 1141.5636      | 571.2855         | 1186.5851 | 593.7962        | 1169.5586      | 585.2829         | F    | <u>708.3673</u>  | 354.6874        | 691.3410        | 346.1741         | 6  |
| 12 | 1273.6171       | 637.3122        | 1256.5906      | 628.7989         | 1301.6121 | 651.3097        | 1284.5855      | 642.7964         | D    | <u>561.2991</u>  | 281.1532        | 544.2726        | 272.6399         | 5  |
| 13 | 1374.6648       | 687.8360        | 1357.6383      | 679.3228         | 1402.6597 | 701.8335        | 1385.6332      | 693.3202         | T    | <u>446.2722</u>  | 223.6397        | 429.2456        | 215.1264         | 4  |
| 14 | 1473.7332       | 737.3703        | 1456.7067      | 728.8570         | 1501.7281 | 751.3677        | 1484.7016      | 742.8544         | V    | <u>345.2245</u>  | 173.1159        | 328.1979        | 164.6026         | 3  |
| 15 | 1544.7703       | 772.8888        | 1527.7438      | 764.3755         | 1572.7653 | 786.8863        | 1555.7387      | 778.3730         | A    | <u>246.1561</u>  | 123.5817        | <u>229.1295</u> | 115.0684         | 2  |
| 16 |                 |                 |                |                  |           |                 |                |                  | R    | <u>175.1190</u>  | 88.0631         | 158.0924        | 79.5498          | 1  |

49

50 **Supplementary Figure 5. LC-MS/MS analysis of purified wildtype TgIT.**

51 A fragment<sub>71</sub>GIPDSRTSKDFDTVAR<sub>86</sub> belonging to TgIT was observed. In which,  
52 the molecular mass of residue S78 (underlined) calculates: (1020.5109-951.4894) \* 1  
53 + 97.9769 (neutral losses, orange underline) + 18 (1 water) = 184.9984Da (orange box  
54 indicated that data used for calculation). The theoretical molecular mass of  
55 phosphoserine is 185.07Da. Thus, S78 was phosphorylated.

56

**Mascot Search Results**

**Peptide View**

MS/MS Fragmentation of **TAKDFDTVAR**  
 Found in **S78A**

Match to Query 1886: 1122.565288 from(562.289920,2+) intensity(10497550.0000)  
 Title: File43612 Spectrum2637 scans: 3948  
 Data file F:\DATA\2017\201712\20171214\bpi\_14819\BPI\_14819\_S78A.raw.mgf

Click mouse within plot area to zoom in by factor of two about that point  
 Or, Plot from  to  Da   
 Label all possible matches  Label matches used for scoring

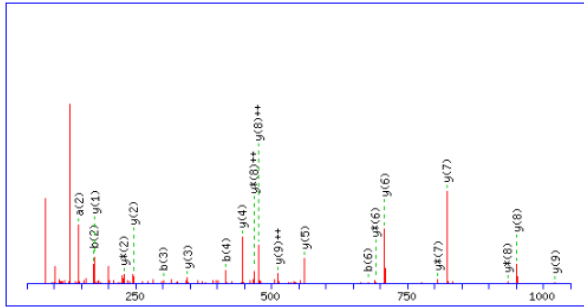

Monoisotopic mass of neutral peptide Mr(calc): 1122.5669  
 Fixed modifications: Carbamidomethyl (C) (apply to specified residues or termini only)  
 Ions Score: 59 Expect: 1.4e-006  
 Matches: 21/100 fragment ions using 42 most intense peaks [\(help\)](#)

| #  | a               | a <sup>++</sup> | a <sup>*</sup> | a <sup>*++</sup> | b               | b <sup>++</sup> | b <sup>*</sup> | b <sup>*++</sup> | Seq. | y                | y <sup>++</sup> | y <sup>*</sup>  | y <sup>*++</sup> | #  |
|----|-----------------|-----------------|----------------|------------------|-----------------|-----------------|----------------|------------------|------|------------------|-----------------|-----------------|------------------|----|
| 1  | 74.0600         | 37.5337         |                |                  | 102.0550        | 51.5311         |                |                  | T    |                  |                 |                 |                  | 10 |
| 2  | <u>145.0972</u> | 73.0522         |                |                  | <u>173.0921</u> | 87.0497         |                |                  | A    | <u>1022.5265</u> | 511.7669        | 1005.5000       | 503.2536         | 9  |
| 3  | 273.1921        | 137.0997        | 256.1656       | 128.5864         | <u>301.1870</u> | 151.0972        | 284.1605       | 142.5839         | K    | <u>951.4894</u>  | <u>476.2483</u> | <u>934.4629</u> | <u>467.7351</u>  | 8  |
| 4  | 388.2191        | 194.6132        | 371.1925       | 186.0999         | <u>416.2140</u> | 208.6106        | 399.1874       | 200.0974         | D    | <u>823.3943</u>  | 412.2009        | <u>806.3679</u> | 403.6876         | 7  |
| 5  | 535.2875        | 268.1474        | 518.2609       | 259.6341         | 563.2824        | 282.1448        | 546.2558       | 273.6316         | F    | <u>708.3673</u>  | 354.6874        | <u>691.3410</u> | 346.1741         | 6  |
| 6  | 650.3144        | 325.6608        | 633.2879       | 317.1476         | <u>678.3093</u> | 339.6583        | 661.2828       | 331.1450         | D    | <u>561.2991</u>  | 281.1532        | 544.2726        | 272.6399         | 5  |
| 7  | 751.3621        | 376.1847        | 734.3355       | 367.6714         | 779.3570        | 390.1821        | 762.3305       | 381.6689         | T    | <u>446.2722</u>  | 223.6397        | 429.2456        | 215.1264         | 4  |
| 8  | 850.4305        | 425.7189        | 833.4040       | 417.2056         | 878.4254        | 439.7164        | 861.3989       | 431.2031         | V    | <u>345.2243</u>  | 173.1159        | 328.1979        | 164.6026         | 3  |
| 9  | 921.4676        | 461.2375        | 904.4411       | 452.7242         | 949.4625        | 475.2349        | 932.4360       | 466.7216         | A    | <u>246.1561</u>  | 123.5817        | <u>229.1295</u> | 115.0684         | 2  |
| 10 |                 |                 |                |                  |                 |                 |                |                  | R    | <u>175.1196</u>  | 88.0631         | 158.0924        | 79.5498          | 1  |

57

58 **Supplementary Figure 6. LC-MS/MS analysis of purified TgIT mutant S78A.**

59 A fragment  ${}_{77}\text{TAKDFDTVAR}_{86}$  belonging to TgIT S78A mutant was observed. In  
 60 which, the molecular mass of residue A78 (underlined) calculates:  $(1022.5265-$   
 61  $951.4894) * 1 + 18$  (1 water) = 89.0371Da (orange box indicated that data used for  
 62 calculation). The theoretical molecular mass of phosphoserine is 185.07Da. Thus,  
 63 residue 78 was alanine, non-phosphorylated.

64

**Mascot Search Results**

**Peptide View**

MS/MS Fragmentation of **TSKDFDTVARR**

Found in **tr|A0A045JBD4|A0A045JBD4\_MYCTX**, Nucleotidyl transferase of uncharacterised function (DUF1814) OS=Mycobacterium tuberculosis GN=B7R63\_05680 PE=4 SV=1

Match to Query 7048: 1374.630132 from(459.217320,3+) intensity(771675.4375)

Title: File4302 Spectrum905 scans: 2846

Data file F:\LCMS\7yue\20180708\16444\BPI\_16444\_2\_WT\_POS.mgf

Click mouse within plot area to zoom in by factor of two about that point

Or, Plot from  to  Da

Label all possible matches  Label matches used for scoring

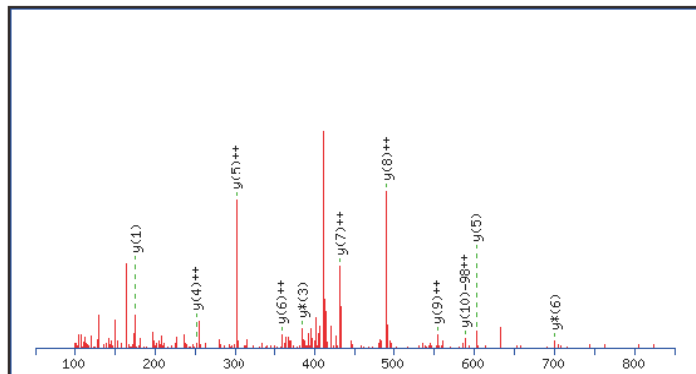

Monoisotopic mass of neutral peptide Mr(calc): 1374.6293  
 Fixed modifications: Carbamidomethyl (C) (apply to specified residues or termini only)  
 Variable modifications:  
 S2 : Phospho (ST), with neutral losses 97.9769(shown in table), 0.0000  
 Ions Score: 13 Expect: 1  
 Matches : 11/184 fragment ions using 56 most intense peaks ([help](#))

| #  | a         | a <sup>++</sup> | a <sup>*</sup> | a <sup>+++</sup> | b         | b <sup>++</sup> | b <sup>*</sup> | b <sup>+++</sup> | Seq. | y               | <u>y<sup>++</sup></u> | y <sup>*</sup>  | y <sup>+++</sup> | #  |
|----|-----------|-----------------|----------------|------------------|-----------|-----------------|----------------|------------------|------|-----------------|-----------------------|-----------------|------------------|----|
| 1  | 74.0600   | 37.5337         |                |                  | 102.0550  | 51.5311         |                |                  | T    |                 |                       |                 |                  | 11 |
| 2  | 143.0815  | 72.0444         |                |                  | 171.0764  | 86.0418         |                |                  | S    | 1176.6120       | <u>588.8096</u>       | 1159.5854       | 580.2964         | 10 |
| 3  | 271.1765  | 136.0919        | 254.1499       | 127.5786         | 299.1714  | 150.0893        | 282.1448       | 141.5761         | K    | 1107.5905       | <u>554.2989</u>       | 1090.5640       | 545.7856         | 9  |
| 4  | 386.2034  | 193.6053        | 369.1769       | 185.0921         | 414.1983  | 207.6028        | 397.1718       | 199.0895         | D    | 979.4956        | <u>490.2514</u>       | 962.4690        | 481.7381         | 8  |
| 5  | 533.2718  | 267.1395        | 516.2453       | 258.6263         | 561.2667  | 281.1370        | 544.2402       | 272.6237         | F    | 864.4686        | <u>432.7380</u>       | 847.4421        | 424.2247         | 7  |
| 6  | 648.2988  | 324.6530        | 631.2722       | 316.1397         | 676.2937  | 338.6505        | 659.2671       | 330.1372         | D    | 717.4002        | <u>359.2037</u>       | <u>700.3737</u> | 350.6905         | 6  |
| 7  | 749.3464  | 375.1769        | 732.3199       | 366.6636         | 777.3414  | 389.1743        | 760.3148       | 380.6610         | T    | <u>602.3733</u> | <u>301.6903</u>       | 585.3467        | 293.1770         | 5  |
| 8  | 848.4149  | 424.7111        | 831.3883       | 416.1978         | 876.4098  | 438.7085        | 859.3832       | 430.1953         | V    | 501.3256        | <u>251.1664</u>       | 484.2990        | 242.6532         | 4  |
| 9  | 919.4520  | 460.2296        | 902.4254       | 451.7163         | 947.4469  | 474.2271        | 930.4203       | 465.7138         | A    | 402.2572        | 201.6322              | <u>385.2306</u> | 193.1190         | 3  |
| 10 | 1075.5531 | 538.2802        | 1058.5265      | 529.7669         | 1103.5480 | 552.2776        | 1086.5215      | 543.7644         | R    | 331.2201        | 166.1137              | 314.1935        | 157.6004         | 2  |
| 11 |           |                 |                |                  |           |                 |                |                  | R    | <u>175.1190</u> | 88.0631               | 158.0924        | 79.5498          | 1  |

65

66 **Supplementary Figure 7. LC-MS/MS analysis of the upper band of wildtype**  
 67 **TglT sample in Phos-tag SDS-PAGE**

68 A fragment **77TSKDFDTVARR<sub>87</sub>** belonging to TglT was identified. In which, the  
 69 molecular mass of residue **S78** (underlined) calculates:  $(588.8096 - 554.2989) * 2 +$   
 70  $97.9769$  (neutral losses, orange underline)  $+ 18(1 \text{ water}) = 184.9983\text{Da}$  (orange box  
 71 indicated that data used for calculation). The theoretical molecular mass of  
 72 phosphoserine is  $185.07\text{Da}$ . Thus, **S78** was phosphorylated.



## **MASCOT** SCIENCE Mascot Search Results

### Peptide View

MS/MS Fragmentation of **TSKDFDTVARR**

Found in **tr|A0A045JBD4|A0A045JBD4\_MYCTX**, Nucleotidyl transferase of uncharacterised function (DUF1814) OS=Mycobacterium tuberculosis GN=B7R63\_05680 PE=4 SV=1

Match to Query 6229: 1294.664742 from(432.562190,3+) intensity(176276.6094)

Title: File4318 Spectrum726 scans: 2640

Data file F:\LCMS\7yue\20180708\16444\BPI\_16444\_1\_WT.mgf

Click mouse within plot area to zoom in by factor of two about that point

Or, Plot from  to  Da

Label all possible matches  Label matches used for scoring

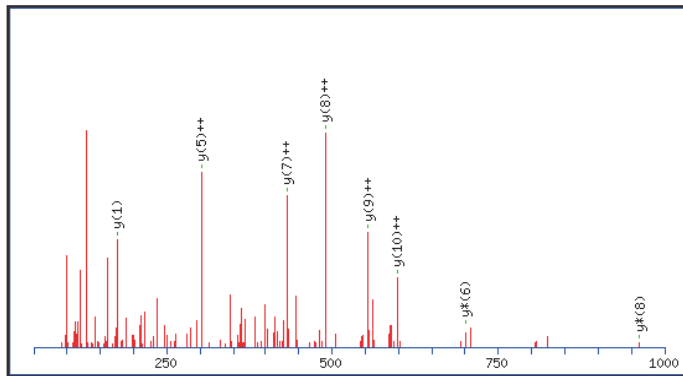

Monoisotopic mass of neutral peptide Mr(calc): 1294.6630

Fixed modifications: Carbamidomethyl (C) (apply to specified residues or termini only)

Ions Score: 24 Expect: 0.009

Matches : 8/112 fragment ions using 17 most intense peaks ([help](#))

| #  | a         | a <sup>++</sup> | a <sup>*</sup> | a <sup>***</sup> | b         | b <sup>++</sup> | b <sup>*</sup> | b <sup>***</sup> | Seq. | y               | y <sup>++</sup> | y <sup>*</sup>  | y <sup>***</sup> | #  |
|----|-----------|-----------------|----------------|------------------|-----------|-----------------|----------------|------------------|------|-----------------|-----------------|-----------------|------------------|----|
| 1  | 74.0600   | 37.5337         |                |                  | 102.0550  | 51.5311         |                |                  | T    |                 |                 |                 |                  | 11 |
| 2  | 161.0921  | 81.0497         |                |                  | 189.0870  | 95.0471         |                |                  | S    | 1194.6226       | <b>597.8149</b> | 1177.5960       | 589.3016         | 10 |
| 3  | 289.1870  | 145.0972        | 272.1605       | 136.5839         | 317.1819  | 159.0946        | 300.1554       | 150.5813         | K    | 1107.5905       | <b>554.2989</b> | 1090.5640       | 545.7856         | 9  |
| 4  | 404.2140  | 202.6106        | 387.1874       | 194.0974         | 432.2089  | 216.6081        | 415.1823       | 208.0948         | D    | 979.4956        | <b>490.2514</b> | <b>962.4690</b> | 481.7381         | 8  |
| 5  | 551.2824  | 276.1448        | 534.2558       | 267.6316         | 579.2773  | 290.1423        | 562.2508       | 281.6290         | F    | 864.4686        | <b>432.7380</b> | 847.4421        | 424.2247         | 7  |
| 6  | 666.3093  | 333.6583        | 649.2828       | 325.1450         | 694.3042  | 347.6558        | 677.2777       | 339.1425         | D    | 717.4002        | 359.2037        | <b>700.3737</b> | 350.6905         | 6  |
| 7  | 767.3570  | 384.1821        | 750.3305       | 375.6689         | 795.3519  | 398.1796        | 778.3254       | 389.6663         | T    | 602.3733        | <b>301.6903</b> | 585.3467        | 293.1770         | 5  |
| 8  | 866.4254  | 433.7164        | 849.3989       | 425.2031         | 894.4203  | 447.7138        | 877.3938       | 439.2005         | V    | 501.3256        | 251.1664        | 484.2990        | 242.6532         | 4  |
| 9  | 937.4625  | 469.2349        | 920.4360       | 460.7216         | 965.4575  | 483.2324        | 948.4309       | 474.7191         | A    | 402.2572        | 201.6322        | 385.2306        | 193.1190         | 3  |
| 10 | 1093.5636 | 547.2855        | 1076.5371      | 538.7722         | 1121.5586 | 561.2829        | 1104.5320      | 552.7696         | R    | 331.2201        | 166.1137        | 314.1935        | 157.6004         | 2  |
| 11 |           |                 |                |                  |           |                 |                |                  | R    | <b>175.1190</b> | 88.0631         | 158.0924        | 79.5498          | 1  |

73

### 74 **Supplementary Figure 8. LC-MS/MS analysis of the lower band of wildtype TgIT**

### 75 **sample in Phos-tag SDS-PAGE**

76 A fragment **77TSKDFDTVARR<sub>87</sub>** belonging to TgIT was identified. In which, the  
 77 molecular mass of residue **S78** (underlined) calculates:  $(597.8149 - 554.2989) * 2 +$   
 78  $18(1 \text{ water}) = 105.032\text{Da}$  (orange box indicated that data used for calculation). The  
 79 theoretical molecular mass of serine is 105.09Da. Thus, **S78** was non-phosphorylated.

80

**MASCOT** SCIENCE Mascot Search Results

**Peptide View**

MS/MS Fragmentation of **TSKDFDTVARR**

Found in **tr|A0A045JBD4|A0A045JBD4\_MYCTX**, Nucleotidyl transferase of uncharacterised function (DUF1814) OS=Mycobacterium tuberculosis GN=B7R63\_05680 PE=4 SV=1

Match to Query 6508: 1374.630132 from(459.217320,3+) intensity(881110.2500)

Title: File4306 Spectrum688 scans: 2721

Data file F:\LCMS\7yue\20180708\16444\BPI\_16444\_3\_E146Q\_PHOS.mgf

Click mouse within plot area to zoom in by factor of two about that point

Or, Plot from 50 to 750 Da Full range

Label all possible matches Label matches used for scoring

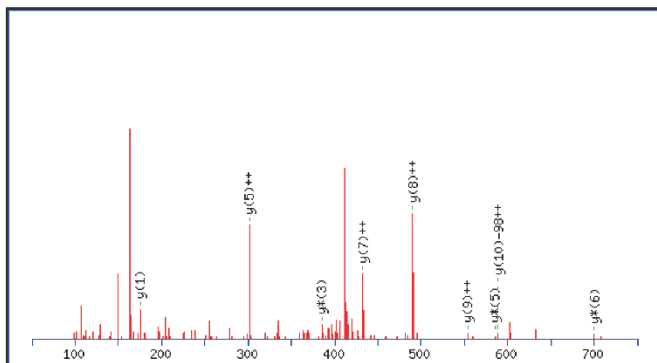

Monoisotopic mass of neutral peptide **Mr(calc)**: 1374.6293

Fixed modifications: Carbamidomethyl (C) (apply to specified residues or termini only)

Variable modifications:

S2: Phospho (ST), with neutral losses 97.9769 (shown in table), 0.0000

Ions Score: 12 Expect: 1

Matches: 9/184 fragment ions using 30 most intense peaks (help)

| #  | a         | a <sup>++</sup> | a <sup>*</sup> | a <sup>+++</sup> | b         | b <sup>++</sup> | b <sup>*</sup> | b <sup>+++</sup> | Seq. | y         | y <sup>++</sup> | y <sup>*</sup> | y <sup>+++</sup> | #  |
|----|-----------|-----------------|----------------|------------------|-----------|-----------------|----------------|------------------|------|-----------|-----------------|----------------|------------------|----|
| 1  | 74.0600   | 37.5337         |                |                  | 102.0550  | 51.5311         |                |                  | T    |           |                 |                |                  | 11 |
| 2  | 143.0815  | 72.0444         |                |                  | 171.0764  | 86.0418         |                |                  | S    | 1176.6120 | 588.8096        | 1159.5854      | 580.2964         | 10 |
| 3  | 271.1765  | 136.0919        | 254.1499       | 127.5786         | 299.1714  | 150.0893        | 282.1448       | 141.5761         | K    | 1107.5905 | 554.2989        | 1090.5640      | 545.7856         | 9  |
| 4  | 386.2034  | 193.6053        | 369.1769       | 185.0921         | 414.1983  | 207.6028        | 397.1718       | 199.0895         | D    | 979.4956  | 490.2514        | 962.4690       | 481.7381         | 8  |
| 5  | 533.2718  | 267.1395        | 516.2453       | 258.6263         | 561.2667  | 281.1370        | 544.2402       | 272.6237         | F    | 864.4686  | 432.7380        | 847.4421       | 424.2247         | 7  |
| 6  | 648.2988  | 324.6530        | 631.2722       | 316.1397         | 676.2937  | 338.6505        | 659.2671       | 330.1372         | D    | 717.4002  | 359.2037        | 700.3737       | 350.6905         | 6  |
| 7  | 749.3464  | 375.1769        | 732.3199       | 366.6636         | 777.3414  | 389.1743        | 760.3148       | 380.6610         | T    | 602.3733  | 301.6903        | 585.3467       | 293.1770         | 5  |
| 8  | 848.4149  | 424.7111        | 831.3883       | 416.1978         | 876.4098  | 438.7085        | 859.3832       | 430.1953         | V    | 501.3256  | 251.1664        | 484.2990       | 242.6532         | 4  |
| 9  | 919.4520  | 460.2296        | 902.4254       | 451.7163         | 947.4469  | 474.2271        | 930.4203       | 465.7138         | A    | 402.2572  | 201.6322        | 385.2306       | 193.1190         | 3  |
| 10 | 1075.5531 | 538.2802        | 1058.5265      | 529.7669         | 1103.5480 | 552.2776        | 1086.5215      | 543.7644         | R    | 331.2201  | 166.1137        | 314.1935       | 157.6004         | 2  |
| 11 |           |                 |                |                  |           |                 |                |                  | R    | 175.1190  | 88.0631         | 158.0924       | 79.5498          | 1  |

81

82 **Supplementary Figure 9. LC-MS/MS analysis of the upper band of TgIT E146Q**  
 83 **sample in Phos-tag SDS-PAGE**

84 A fragment <sup>77</sup>TSKDFDTVARR<sub>87</sub> belonging to TgIT was identified. In which, the  
 85 molecular mass of residue S78 (underlined) calculates: (588.8096-554.2989) \* 2 +  
 86 97.9769 (neutral losses, orange underline) + 18(1 water) = 184.9983Da (orange box  
 87 indicated that data used for calculation). The theoretical molecular mass of  
 88 phosphoserine is 185.07Da. Thus, S78 was phosphorylated.

89

**Mascot Search Results**

**Peptide View**

MS/MS Fragmentation of **TSKDFDTVARR**

Found in **tr|A0A045JBD4|A0A045JBD4\_MYCTX**, Nucleotidyl transferase of uncharacterised function (DUF1814) OS=Mycobacterium tuberculosis GN=B7R63\_05680 PE=4 SV=1

Match to Query 5410: 1294.666782 from(432.562870,3+) intensity(582001.4375)

Title: File4304 Spectrum623 scans: 2574

Data file F:\LCMS\7yue\20180708\16444\BPI\_16444\_3\_E146Q.mgf

Click mouse within plot area to zoom in by factor of two about that point

Or,  to  Da   
 Label all possible matches  Label matches used for scoring

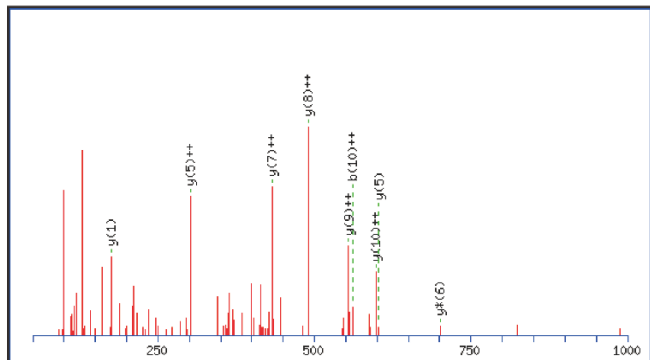

Monoisotopic mass of neutral peptide Mr(calc): 1294.6630

Fixed modifications: Carbamidomethyl (C) (apply to specified residues or termini only)

Ions Score: 21 Expect: 0.86

Matches : 9/112 fragment ions using 21 most intense peaks [\(help\)](#)

| #  | a         | a <sup>++</sup> | a <sup>*</sup> | a <sup>*++</sup> | b         | b <sup>++</sup> | b <sup>*</sup> | b <sup>*++</sup> | Seq. | y         | y <sup>++</sup> | y <sup>*</sup> | y <sup>*++</sup> | #  |
|----|-----------|-----------------|----------------|------------------|-----------|-----------------|----------------|------------------|------|-----------|-----------------|----------------|------------------|----|
| 1  | 74.0600   | 37.5337         |                |                  | 102.0550  | 51.5311         |                |                  | T    |           |                 |                |                  | 11 |
| 2  | 161.0921  | 81.0497         |                |                  | 189.0870  | 95.0471         |                |                  | S    | 1194.6226 | 597.8149        | 1177.5960      | 589.3016         | 10 |
| 3  | 289.1870  | 145.0972        | 272.1605       | 136.5839         | 317.1819  | 159.0946        | 300.1554       | 150.5813         | K    | 1107.5905 | 554.2989        | 1090.5640      | 545.7856         | 9  |
| 4  | 404.2140  | 202.6106        | 387.1874       | 194.0974         | 432.2089  | 216.6081        | 415.1823       | 208.0948         | D    | 979.4956  | 490.2514        | 962.4690       | 481.7381         | 8  |
| 5  | 551.2824  | 276.1448        | 534.2558       | 267.6316         | 579.2773  | 290.1423        | 562.2508       | 281.6290         | F    | 864.4686  | 432.7380        | 847.4421       | 424.2247         | 7  |
| 6  | 666.3093  | 333.6583        | 649.2828       | 325.1450         | 694.3042  | 347.6558        | 677.2777       | 339.1425         | D    | 717.4002  | 359.2037        | 700.3737       | 350.6905         | 6  |
| 7  | 767.3570  | 384.1821        | 750.3305       | 375.6689         | 795.3519  | 398.1796        | 778.3254       | 389.6663         | T    | 602.3733  | 301.6903        | 585.3467       | 293.1770         | 5  |
| 8  | 866.4254  | 433.7164        | 849.3989       | 425.2031         | 894.4203  | 447.7138        | 877.3938       | 439.2005         | V    | 501.3256  | 251.1664        | 484.2990       | 242.6532         | 4  |
| 9  | 937.4625  | 469.2349        | 920.4360       | 460.7216         | 965.4575  | 483.2324        | 948.4309       | 474.7191         | A    | 402.2572  | 201.6322        | 385.2306       | 193.1190         | 3  |
| 10 | 1093.5636 | 547.2855        | 1076.5371      | 538.7722         | 1121.5586 | 561.2829        | 1104.5320      | 552.7696         | R    | 331.2201  | 166.1137        | 314.1935       | 157.6004         | 2  |
| 11 |           |                 |                |                  |           |                 |                |                  | R    | 175.1190  | 88.0631         | 158.0924       | 79.5498          | 1  |

90

**Supplementary Figure 10. LC-MS/MS analysis of the lower band of TgIT E146Q sample in Phos-tag SDS-PAGE**

A fragment 77TSKDFDTVARR<sub>87</sub> belonging to TgIT was identified. In which, the molecular mass of residue S78 (underlined) calculates: (597.8149-554.2989) \* 2 + 18(1 water) = 105.032Da (orange box indicated that data used for calculation). The theoretical molecular mass of serine is 105.09Da. Thus, S78 was non-phosphorylated.

97

98

99

100

101

102

**A**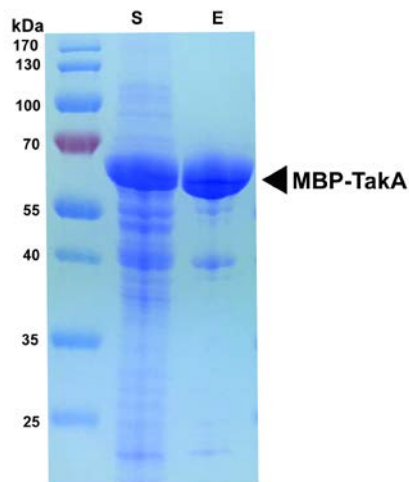**B**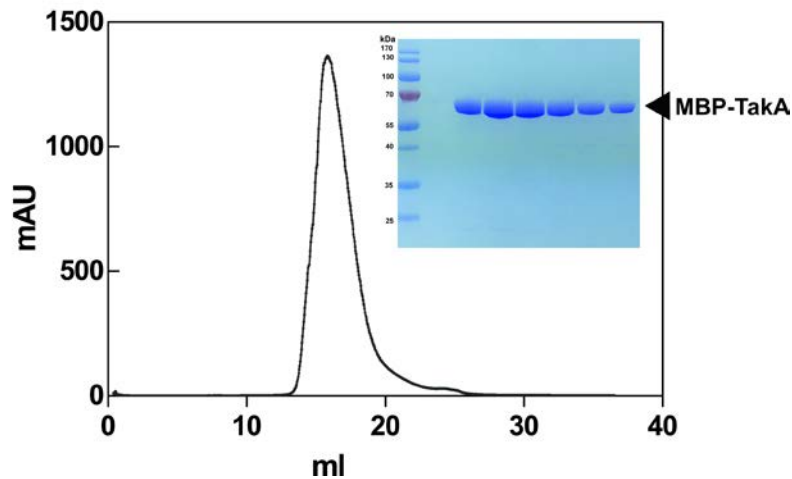

103

104

**Supplementary Figure 11 Purification of MBP-TakA.**

105

A. SDS-PAGE analysis of MBP-TakA purification using amylose resin (NEW ENGLAND BioLabs). Left lane, molecular weight standards, the molecular mass of the standard proteins are indicated. Middle lane, S stands for supernatant. Cells lysate was clarified by centrifugation and the supernatant was loaded to SDS-PAGE. Right lane, E stands for elution. MBP-TakA was eluted from amylose resin using an elution buffer containing 50mM Tris, pH=8.0, 150mM NaCl and 10mM maltose.

108

B. Size-exclusion chromatography was used as the final step of the purification.

112

Average fraction absorbance (mAu) is plot as the function of elution volume (ml).

113

Right insert: SDS-PAGE analysis of the fractions corresponding to the elution

114

peak.

115

116

117

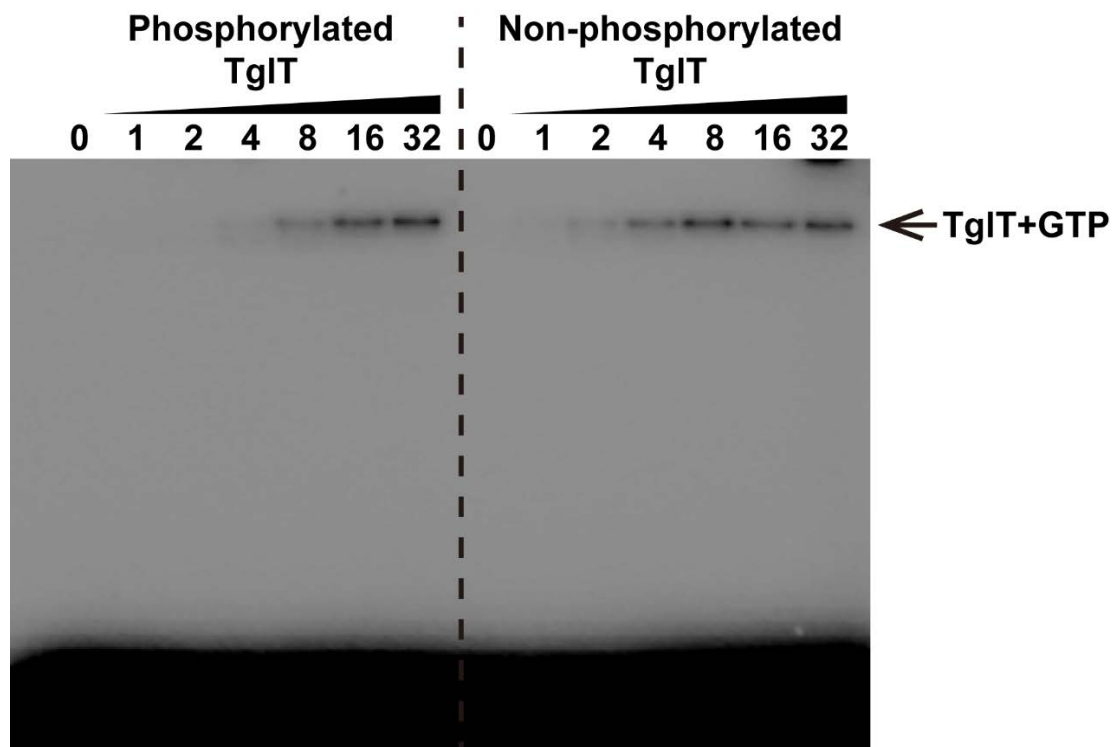

118

119 **Supplementary Figure 12 Phosphorylation at residue S78 hindered GTP binding.**

120 GTP binding assay showed non-phosphorylated TglT exhibited higher binding affinity  
121 comparing to phosphorylated TglT. Non-phosphorylated TglT and phosphorylated  
122 TglT proteins were verified by LC-MS/MS (Supplementary Fig.5 & Fig.16) prior to  
123 GTP binding assay. [ $\alpha$ - $^{32}$ P] GTP (3.3nM) was inoculated with increasing amount of  
124 phosphorylated TglT and non-phosphorylated TglT. Protein concentration series were  
125 1 $\mu$ M, 2 $\mu$ M, 4 $\mu$ M, 8 $\mu$ M, 16 $\mu$ M and 32 $\mu$ M. The mixtures were analyzed by Native-PAGE  
126 and visualized by autoradiography.

127

128



A

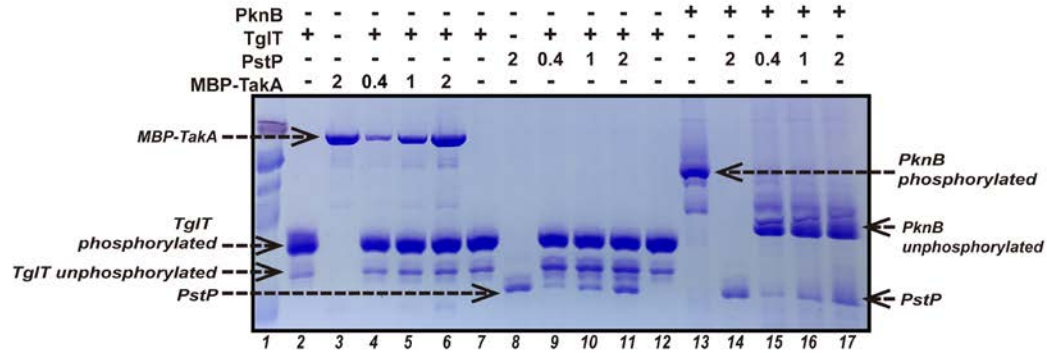

B

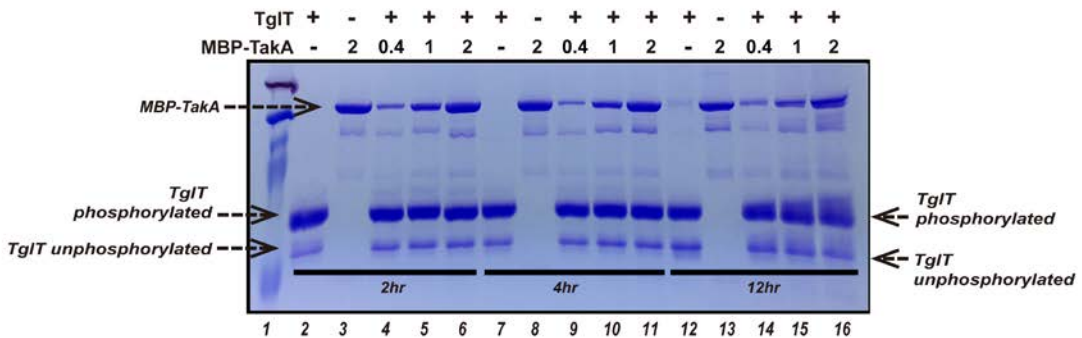

C

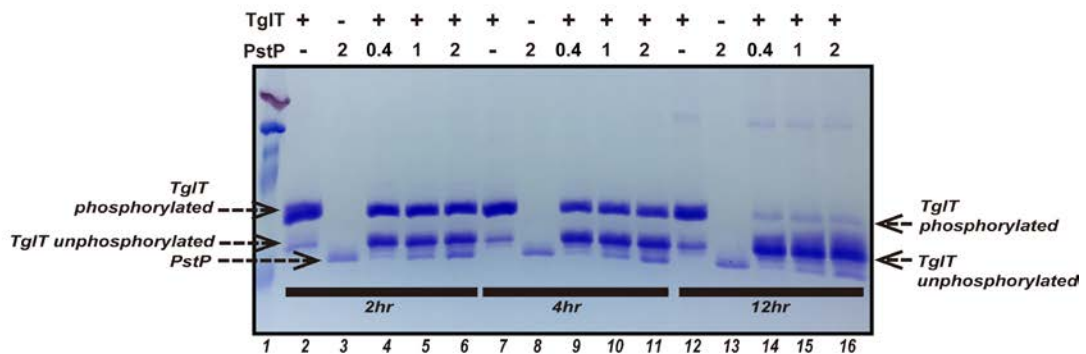

146

147

**Supplementary Figure 14 Protein phosphatase assays suggest how TgIT is dephosphorylated.**

148

149

To investigate the mechanism of TgIT dephosphorylation, we conducted protein phosphatase assay as previously described<sup>1</sup>. We incubated the phosphorylated TgIT alone, with TakA kinase and with Mtb Ser-Thr phosphatase PstP (Rv0018c), respectively. The reactions were then analyzed by using Phos-tag SDS-PAGE.

153

A. The phosphorylated TgIT (lane 2), the full-length MBP-TakA (lane 3), the catalytic domain of PstP<sub>1-240aa</sub> (lane 8) and the autophosphorylated catalytic domain of PknB<sub>1-279aa</sub> (lane 13) were expressed and purified. Increasing amount of MBP-TakA (0.4-2μM) were incubated with TgIT (5μM), lanes 4-6; increasing amount of PstP<sub>1-240aa</sub> (0.4-2μM) were incubated with TgIT(5μM), lanes 9-11. TgIT was incubated alone for 12 hours, lane 12. PstP<sub>1-240aa</sub> (0.4-2μM) catalyzed dephosphorylation of PknB<sub>1-279aa</sub> (5μM) served as the positive control, lanes 14-17

160

B. Phosphatase assays with extended incubation time. The phosphorylated TgIT (5μM)

161 was incubated with increasing amount of MBP-TakA (0.4-2 $\mu$ M). The incubation  
162 time of the reactions were 2 hours (lanes 2-6), 4 hours (lanes 7-11) and 12 hours  
163 (lanes 12-16) as indicated.

164 C. Phosphatase assays with extended incubation time. The phosphorylated TgIT (5 $\mu$ M)  
165 was incubated with increasing amount of PstP<sub>1-240aa</sub> (0.4-2 $\mu$ M). The incubation  
166 time of the reactions were 2 hours (lanes 2-6), 4 hours (lanes 7-11) and 12 hours  
167 (lanes 12-16) as indicated.

168



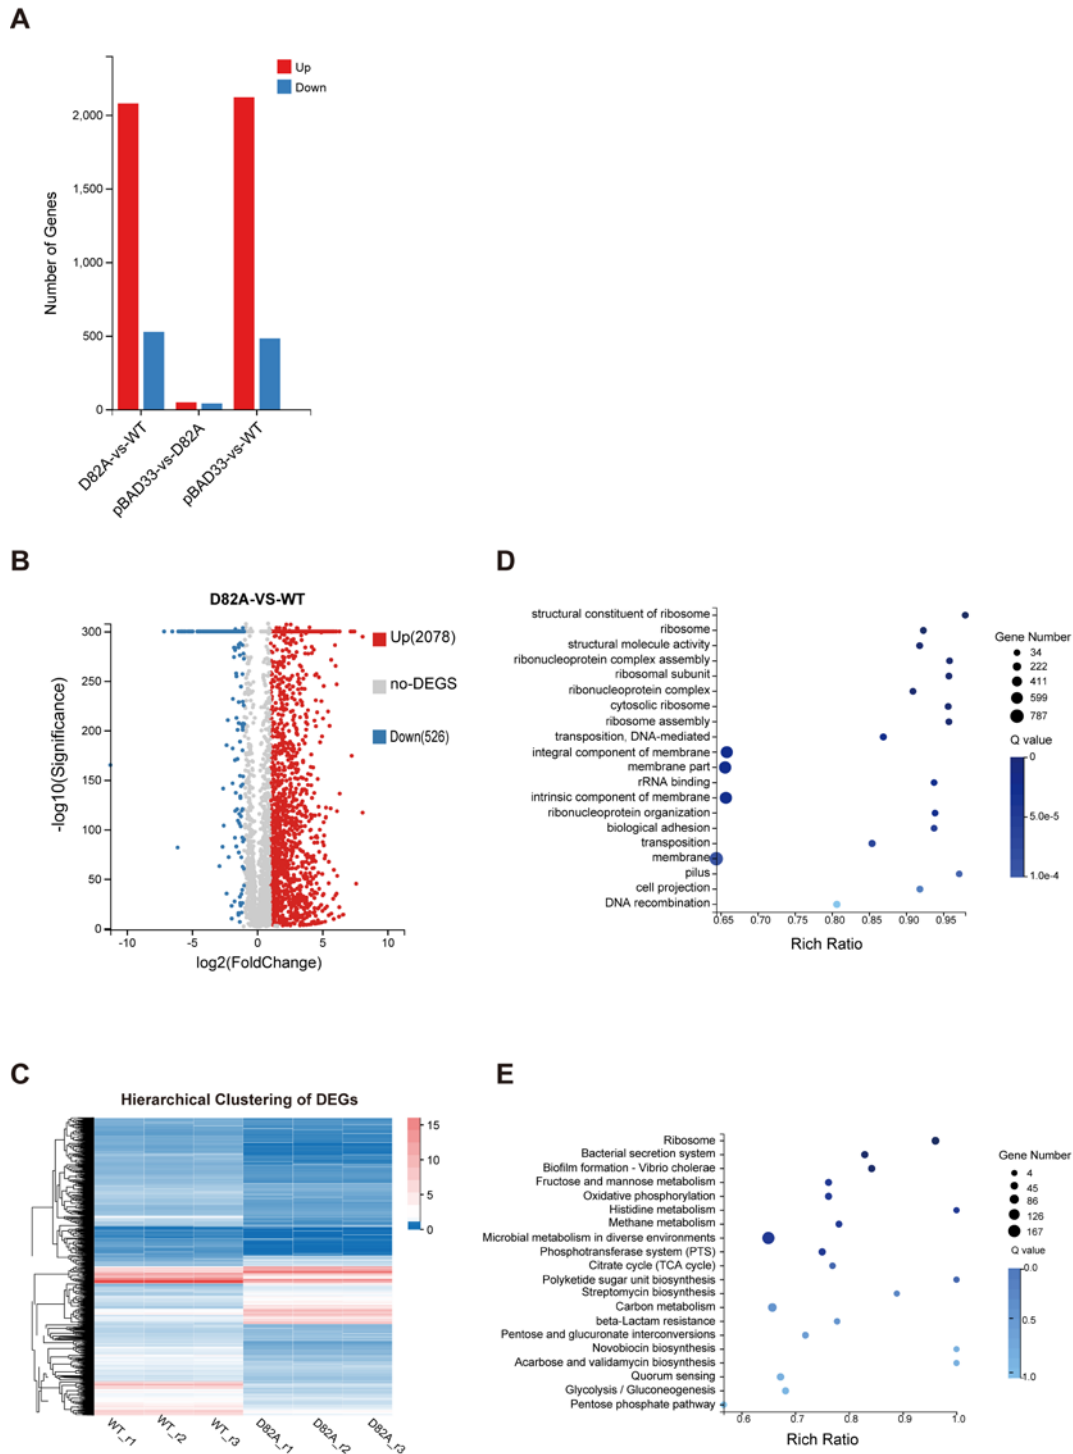

169

170

171 **Supplementary Figure 15 RNA-seq analysis of differentially expressed genes**  
 172 **(DEGs) of bacteria expressing wildtype TgIT and mutant D82A.**

173 A. DEGs analyses of bacteria expressing wildtype TgIT vs D82A mutant, empty  
 174 vector pBAD33 vs D82A mutant and pBAD33 vs wildtype TgIT. The x axis  
 175 represents pairwise between each group. The y axis means DEG numbers. Red  
 176 color represents up-regulated DEGs, and blue color represents down-regulated  
 177 DEGs. Compared with the wildtype TgIT, the transcriptional profiles of the blank

178 control (emtpor vector) and D82A mutant show only minor variations that were not  
179 statistically significant.

180 B. Scatter plot of DEGs between bacteria expressing wildtype TglT and mutant D82A.  
181 The x axis represents  $\log_2$  transformed fold change, whereas the y axis represents  
182  $-\log_{10}$  transformed significance. Red points are up-regulated DEGs; blue points  
183 are down-regulated DEGs; and gray points are non-DEGs.

184 C. Hierarchical clustering of DEGs. Gradient color barcode at the right top indicates  
185  $\log_2(\text{FC})$  value. FC is Fold-Change of expression in TglT and D82A, from high  
186 (red) to low (blue). The x axis represents samples, whereas the y axis represents  
187 DEGs.

188 D. GO functional enrichment of DEGs. 20 most enriched terms are displayed. The x  
189 axis represents the Rich Ratio, whereas the y axis represents GO term. Lower the  
190 Q value, more significant enrichment. Point size indicates DEGs number. Rich  
191 Ratio is the quotient of the number of DEGs over total gene number, larger the  
192 value, the more significant.

193 E. KEGG-database-based pathway enrichment analysis. The top 20 enriched  
194 pathways are plotted. X axis represents Rich Ration. The y axis represents  
195 pathways, whereas the x axis represents Rich Ratio (the quotient of DEGs numbers  
196 over all gene numbers annotated in the pathway). The color indicates the Q value,  
197 lower the Q value, more significant. Point size indicates DEG number (bigger dot  
198 indicates larger number).

199  
200

**MASCOT** Mascot Search Results

**Peptide View**

MS/MS Fragmentation of **TSKDFDTVAR**

Found in **tr|A0A045JBD4|A0A045JBD4\_MYCTX**, Nucleotidyl transferase of uncharacterised function (DUF1814)  
 OS=Mycobacterium tuberculosis GN=B7R63\_05680 PE=4 SV=1

Match to Query 2782: 1138.562968 from(570.288760,2+) intensity(20893570.0000)

Title: File8725 Spectrum1329 scans: 3198

Data file F:\DATA\2019\lyue\20190114\17872\BP1\_17872\_1045MBP.mgf

Click mouse within plot area to zoom in by factor of two about that point

Or, Plot from  to  Da

Label all possible matches  Label matches used for scoring

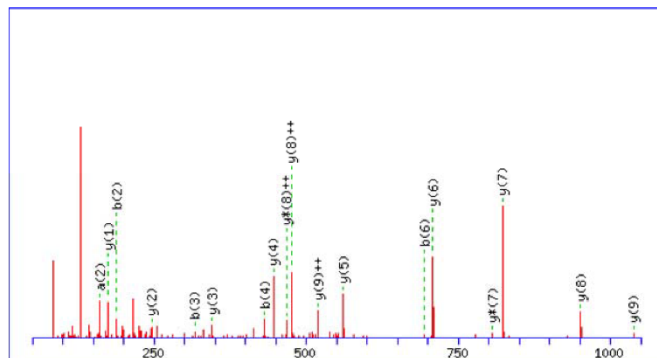

Monoisotopic mass of neutral peptide Mr(calc): 1138.5619

Fixed modifications: Carbamidomethyl (C) (apply to specified residues or termini only)

Ions Score: 49 Expect: 0.00012

Matches : 18/100 fragment ions using 49 most intense peaks (help)

| #  | a               | a <sup>++</sup> | a <sup>*</sup> | a <sup>*++</sup> | b               | b <sup>++</sup> | b <sup>*</sup> | b <sup>*++</sup> | Seq. | y                | y <sup>++</sup> | y <sup>*</sup>  | y <sup>*++</sup> | #  |
|----|-----------------|-----------------|----------------|------------------|-----------------|-----------------|----------------|------------------|------|------------------|-----------------|-----------------|------------------|----|
| 1  | 74.0600         | 37.5337         |                |                  | 102.0550        | 51.5311         |                |                  | T    |                  |                 |                 |                  | 10 |
| 2  | <b>161.0921</b> | 81.0497         |                |                  | <b>189.0870</b> | 95.0471         |                |                  | S    | <b>1038.5215</b> | <b>519.7644</b> | 1021.4949       | 511.2511         | 9  |
| 3  | 289.1870        | 145.0972        | 272.1605       | 136.5839         | <b>317.1819</b> | 159.0946        | 300.1554       | 150.5813         | K    | <b>951.4894</b>  | <b>476.2483</b> | 934.4629        | <b>467.7351</b>  | 8  |
| 4  | 404.2140        | 202.6106        | 387.1874       | 194.0974         | <b>432.2089</b> | 216.6081        | 415.1823       | 208.0948         | D    | <b>823.3945</b>  | 412.2009        | <b>806.3679</b> | 403.6876         | 7  |
| 5  | 551.2824        | 276.1448        | 534.2558       | 267.6316         | 579.2773        | 290.1423        | 562.2508       | 281.6290         | F    | <b>708.3675</b>  | 354.6874        | 691.3410        | 346.1741         | 6  |
| 6  | 666.3093        | 333.6583        | 649.2828       | 325.1450         | <b>694.3042</b> | 347.6558        | 677.2777       | 339.1425         | D    | <b>561.2991</b>  | 281.1532        | 544.2726        | 272.6399         | 5  |
| 7  | 767.3570        | 384.1821        | 750.3305       | 375.6689         | 795.3519        | 398.1796        | 778.3254       | 389.6663         | T    | <b>446.2722</b>  | 223.6397        | 429.2456        | 215.1264         | 4  |
| 8  | 866.4254        | 433.7164        | 849.3989       | 425.2031         | 894.4203        | 447.7138        | 877.3938       | 439.2005         | V    | <b>345.2245</b>  | 173.1159        | 328.1979        | 164.6026         | 3  |
| 9  | 937.4625        | 469.2349        | 920.4360       | 460.7216         | 965.4575        | 483.2324        | 948.4309       | 474.7191         | A    | <b>246.1561</b>  | 123.5817        | 229.1295        | 115.0684         | 2  |
| 10 |                 |                 |                |                  |                 |                 |                |                  | R    | <b>175.1190</b>  | 88.0631         | 158.0924        | 79.5498          | 1  |

201

202 **Supplementary Figure 16. LC-MS/MS analysis of the non-phosphorylated TgIT,**  
 203 **co-expressed with MBP.**

204 A fragment **77TSKDFDTVARR<sub>87</sub>** belonging to TgIT was identified. In which, the  
 205 molecular mass of residue **S78** (underlined) calculates: **1038.5215-951.4894 + 18(1**  
 206 **water) = 105.0321Da** (orange box indicated that data used for calculation). The  
 207 theoretical molecular mass of serine is 105.09Da. Thus, **S78** was non-phosphorylated.

208

209

210

211

212

213

214

215

216

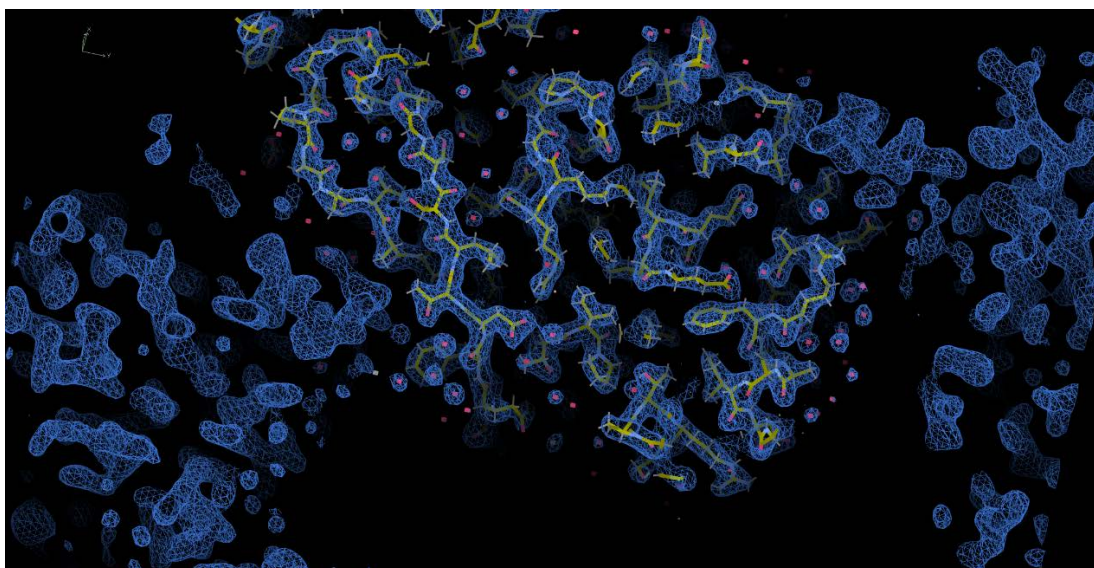

217

218 **Supplementary Figure 17 Final 2Fo-Fc map of the crystal structure of wildtype**  
219 **TglT.**

220 An overview of final 2Fo-Fc map (contour 1.5s, blue mesh) of the crystal structure of  
221 wildtype TglT is superimposed with final stick model of wildtype TglT, colored by  
222 atom type. There is one molecular in asymmetric unit; the models of the symmetry  
223 related molecules are not shown.

224

225 **Supplementary Tables**226 **Supplementary Table 1 Dali search of TglT structure against PDB90 database<sup>a</sup> (top**227 **30 Z-score hits).**

| No.        | Chain <sup>b</sup> | Z <sup>c</sup> | rmsd | lali <sup>d</sup> | nres <sup>e</sup> | %id <sup>f</sup> | Description                                                           |
|------------|--------------------|----------------|------|-------------------|-------------------|------------------|-----------------------------------------------------------------------|
| <b>1:</b>  | 4ok0-A             | 14.4           | 4.1  | 199               | 225               | 16               | MOLECULE: PUTATIVE;                                                   |
| <b>2:</b>  | 4ok0-B             | 14.4           | 4.2  | 204               | 227               | 16               | MOLECULE: PUTATIVE;                                                   |
| <b>3:</b>  | 4o8s-A             | 14.1           | 4.1  | 204               | 232               | 15               | MOLECULE: PUTATIVE;                                                   |
| <b>4:</b>  | 5cfu-A             | 11.3           | 3.6  | 153               | 174               | 10               | MOLECULE:<br>AMINOGLYCOSIDE<br>NUCLEOTIDYLTRANSFERASE (2'')-IA;       |
| <b>5:</b>  | 5cft-A             | 11.2           | 3.4  | 151               | 175               | 10               | MOLECULE:<br>AMINOGLYCOSIDE<br>NUCLEOTIDYLTRANSFERASE (2'')-IA;       |
| <b>6:</b>  | 5cfs-A             | 11.1           | 3.5  | 152               | 176               | 10               | MOLECULE:<br>AAD(2''),GENTAMICIN<br>2''-<br>NUCLEOTIDYLTRANSFERASE,GE |
| <b>7:</b>  | 4xje-A             | 11.1           | 3.8  | 153               | 175               | 11               | MOLECULE: AADB;                                                       |
| <b>8:</b>  | 4wql-A             | 11.1           | 3.7  | 153               | 175               | 10               | MOLECULE:<br>2''-AMINOGLYCOSIDE<br>NUCLEOTIDYLTRANSFERASE;            |
| <b>9:</b>  | 4wqk-A             | 10.6           | 3.7  | 156               | 175               | 12               | MOLECULE:<br>2''-AMINOGLYCOSIDE<br>NUCLEOTIDYLTRANSFERASE;            |
| <b>10:</b> | 4e8j-B             | 9.6            | 3.0  | 133               | 158               | 11               | MOLECULE:<br>LINCOSAMIDE<br>RESISTANCE PROTEIN;                       |
| <b>11:</b> | 2ewr-A             | 9.5            | 3.3  | 139               | 156               | 9                | MOLECULE:<br>HYPOTHETICAL<br>PROTEIN TM1012;                          |
| <b>12:</b> | 2fcl-A             | 9.4            | 3.3  | 140               | 157               | 9                | MOLECULE:<br>HYPOTHETICAL<br>PROTEIN TM1012;                          |
| <b>13:</b> | 4e8i-B             | 9.2            | 3.0  | 134               | 158               | 11               | MOLECULE:<br>LINCOSAMIDE<br>RESISTANCE PROTEIN;                       |
| <b>14:</b> | 4fo1-B             | 9.2            | 3.1  | 134               | 158               | 11               | MOLECULE:                                                             |

|            |        |     |     |     |     |    |                                                                |
|------------|--------|-----|-----|-----|-----|----|----------------------------------------------------------------|
|            |        |     |     |     |     |    | LINCOSAMIDE<br>RESISTANCE PROTEIN;                             |
| <b>15:</b> | 4wh5-B | 9.1 | 3.0 | 133 | 158 | 11 | MOLECULE:<br>LINCOSAMIDE<br>RESISTANCE PROTEIN;                |
| <b>16:</b> | 4fo1-A | 9.1 | 3.1 | 134 | 158 | 11 | MOLECULE:<br>LINCOSAMIDE<br>RESISTANCE PROTEIN;                |
| <b>17:</b> | 4wh5-A | 9.1 | 2.9 | 132 | 158 | 11 | MOLECULE:<br>LINCOSAMIDE<br>RESISTANCE PROTEIN;                |
| <b>18:</b> | 4e8j-A | 9.1 | 2.9 | 132 | 158 | 11 | MOLECULE:<br>LINCOSAMIDE<br>RESISTANCE PROTEIN;                |
| <b>19:</b> | 4e8i-A | 9.1 | 3.1 | 135 | 158 | 11 | MOLECULE:<br>LINCOSAMIDE<br>RESISTANCE PROTEIN;                |
| <b>20:</b> | 4wse-B | 8.9 | 4.8 | 176 | 495 | 9  | MOLECULE: PUTATIVE<br>POLY(A) POLYMERASE<br>CATALYTIC SUBUNIT; |
| <b>21:</b> | 4hx0-A | 8.5 | 2.9 | 132 | 161 | 8  | MOLECULE:<br>PUTATIVE<br>NUCLEOTIDYLTRANSFERASE<br>TM1012;     |
| <b>22:</b> | 4tur-A | 7.4 | 5.2 | 116 | 327 | 10 | MOLECULE:DNA<br>POLYMERASE<br>BETA;                            |
| <b>23:</b> | 4p37-A | 7.3 | 4.8 | 165 | 498 | 10 | MOLECULE:PUTATIVE<br>POLY(A) POLYMERASE<br>CATALYTIC SUBUNIT;  |
| <b>24:</b> | 5j29-A | 7.3 | 5.1 | 117 | 326 | 10 | MOLECULE:DNA<br>POLYMERASE BETA;                               |
| <b>25:</b> | 4p2h-A | 7.3 | 4.1 | 112 | 324 | 10 | MOLECULE:DNA<br>POLYMERASE BETA;                               |
| <b>26:</b> | 4yn4-A | 7.3 | 4.9 | 117 | 327 | 10 | MOLECULE: DNA<br>POLYMERASE<br>BETA;                           |
| <b>27:</b> | 4pgq-A | 7.3 | 4.2 | 114 | 324 | 10 | MOLECULE: DNA<br>POLYMERASE<br>BETA;                           |
| <b>28:</b> | 5j0v-A | 7.3 | 4.1 | 113 | 326 | 10 | MOLECULE: DNA<br>POLYMERASE<br>BETA;                           |

|            |        |     |     |     |     |    |                                      |
|------------|--------|-----|-----|-----|-----|----|--------------------------------------|
| <b>29:</b> | 5j0u-A | 7.3 | 4.1 | 113 | 326 | 10 | MOLECULE: DNA<br>POLYMERASE<br>BETA; |
| <b>30:</b> | 4mf8-A | 7.3 | 4.7 | 114 | 318 | 11 | MOLECULE: DNA<br>POLYMERASE<br>BETA; |

228 <sup>a</sup> PDB90 is a non-redundant subset of Protein Data Bank structures with less than 90% sequence

229 identity to each other.

230 <sup>b</sup> PDB code and chain ID

231 <sup>c</sup> Dali Z-score

232 <sup>d</sup> The number of aligned C-alpha atoms

233 <sup>e</sup> The number of C-alpha atoms in the database structure

234 <sup>f</sup> Amino acids sequence identity

235

236

**Supplementary Table 2 Plasmids used in this study.**

| <i>Vector name</i>      | <i>Descriptions</i>                                 | <i>Name of the protein expressed</i> | <i>Expression inducer</i> | <i>Antibiotic resistance</i> | <i>Oligo sequences</i>                                                                                        |
|-------------------------|-----------------------------------------------------|--------------------------------------|---------------------------|------------------------------|---------------------------------------------------------------------------------------------------------------|
| pET28a                  | Expression plasmid                                  | None                                 | IPTG                      | kanamycin                    |                                                                                                               |
| pET28a-n-6His-Rv1044    | Expressing antitoxin TakA with N-terminal 6×Histag  | His-TakA                             | IPTG                      | kanamycin                    | Forward:<br>GTCGCATATGTGT<br>GCAAACCGTAT<br>CT<br>Reverse:<br>TCTGCTCGAGTC<br>ACGCCGATGCTC<br>GCTTC           |
| pETDuet-1               | Expression plasmid                                  | None                                 | IPTG                      | ampicillin                   |                                                                                                               |
| pETDuet-1-Rv1044 no tag | Expressing antitoxin TakA for neutralizing toxicity | TakA                                 | IPTG                      | ampicillin                   | Forward:<br>GTCGCCATGGGC<br>TTGTGTGCAAAA<br>CCGTATC<br>Reverse:TCTGAAG<br>CTTTCACGCCGA<br>TGCTCGCTTCGG<br>CCG |
| pET28a-n-6His-Rv1045    | Expressing TglT protein with N-terminal-6×His       | His-TglT                             | IPTG                      | kanamycin                    | Forward:<br>GTCGCATATGAC<br>CAAGCCCTATTC<br>Reverse:<br>TCTGCTCGAGTC                                          |



|                            |                                                    |                |      |           |                                                                                                        |
|----------------------------|----------------------------------------------------|----------------|------|-----------|--------------------------------------------------------------------------------------------------------|
|                            |                                                    |                |      |           | ATCTTTTCGTCGC<br>CCGAT                                                                                 |
| pET28a-n-6His-Rv1045-G62A  | Expressing TglT G62A mutant with N-terminal-6×His  | His-TglT-G62A  | IPTG | kanamycin | Forward:<br>CTGTTGGTCAAA<br>GCCGGATCGTCG<br>CTG<br>Reverse:<br>CAGCGACGATCC<br>GGCTTTGACCAA<br>CAG     |
| pET28a-n-6His-Rv1045-S78A  | Expressing TglT S78A mutant with N-terminal-6×His  | His-TglT-S78A  | IPTG | kanamycin | Forward:<br>GATTCGCGGACC<br>GCCAAAGACTTC<br>G<br>Reverse:<br>CGAAGTCTTTGG<br>CGGTCCGCGAAT<br>C         |
| pET28a-n-6His-Rv1045-S78D  | Expressing TglT S78D mutant with N-terminal-6×His  | His-TglT-S78D  | IPTG | kanamycin | Forward:<br>CCGATTCGCGGA<br>CCGACAAAGACT<br>TCGAC<br>Reverse:<br>GTCGAAGTCTTT<br>GTCGGTCCGCGA<br>ATCGG |
| pET28a-n-6His-Rv1045-D82A  | Expressing TglT D82A mutant with N-terminal-6×His  | His-TglT-D82A  | IPTG | kanamycin | Forward:<br>CTCAAAGACTT<br>CGCAACGGTCGC<br>ACGTC<br>Reverse:<br>GACGTGCGACCG<br>TTGCGAAGTCTT<br>TGGAG  |
| pET28a-n-6His-Rv1045-E146Q | Expressing TglT E146Q mutant with N-terminal-6×His | His-TglT-E146Q | IPTG | kanamycin | Forward:<br>CAACTGTTCCGA<br>TCCAGGTCTCCT<br>CCGTC<br>Reverse:<br>GACGGAGGAGA<br>CCTGGATCGGAA<br>CAGTTG |

|                            |                                                    |                |             |                 |                                                                                                                                                                  |
|----------------------------|----------------------------------------------------|----------------|-------------|-----------------|------------------------------------------------------------------------------------------------------------------------------------------------------------------|
| pET28a-n-6His-Rv1045-K189N | Expressing TglT K189N mutant with N-terminal-6×His | His-TglT-K189N | IPTG        | kanamycin       | Forward:<br>CAAATCGCGCAG<br>AACCTGCACGCA<br>GTAAC<br>Reverse:<br>GTTACTGCGTGC<br>AGGTTCTGCGCG<br>ATTG                                                            |
| pET28a-n-6His-Rv1045-D208A | Expressing TglT D208A mutant with N-terminal-6×His | His-TglT-D208A | IPTG        | kanamycin       | Forward:<br>ACCGCGCTCACG<br>CACTGGTGGACT<br>TGCAGCTTCTT<br>Reverse:<br>AAGAAGCTGCA<br>AGTCCACCAGTG<br>CGTGAGCGCGGT                                               |
| pBAD33                     | Arabinose-inducible expression plasmid             | None           | L-arabinose | chloramphenicol |                                                                                                                                                                  |
| pBAD33-c-6His-Rv1045       | Expressing TglT toxin with C-terminal-6×His        | TglT-His       | L-arabinose | chloramphenicol | Forward: GTCG<br>GGTACCAAGAAG<br>GAGATATACATAT<br>G<br>ATGACCAAGCCC<br>TATTCGTC<br>Reverse:<br>TCTGAAGCTTTC<br>A<br>GTGGTGGTGGTG<br>GTGGTGTCTTTT<br>CGTCGCCCGATC |
| pBAD33-c-6His-Rv1045-G62A  | Expressing TglT G62A mutant with C-terminal-6×His  | TglT-G62A-His  | L-arabinose | chloramphenicol | Forward:<br>CTGTTGGTCAAA<br>GCCGGATCGTTCG<br>CTG                                                                                                                 |

|                            |                                                    |                |             |                 |                                                                                                        |
|----------------------------|----------------------------------------------------|----------------|-------------|-----------------|--------------------------------------------------------------------------------------------------------|
|                            |                                                    |                |             |                 | Reverse:<br>CAGCGACGATCC<br>GGCTTTGACCAA<br>CAG                                                        |
| pBAD33-c-6His-Rv1045-S78A  | Expressing TglT S78A mutant with C-terminal-6×His  | TglT-S78A-His  | L-arabinose | chloramphenicol | Forward:<br>GATTCGCGGACC<br>GCCAAAGACTTC<br>G<br>Reverse:<br>CGAAGTCTTTGG<br>CGGTCCGCGAAT<br>C         |
| pBAD33-c-6His-Rv1045-S78D  | Expressing TglT S78D mutant with C-terminal-6×His  | TglT-S78D-His  | L-arabinose | chloramphenicol | Forward:<br>CCGATTCGCGGA<br>CCGACAAAGACT<br>TCGAC<br>Reverse:<br>GTCGAAGTCTTT<br>GTCGGTCCGCGA<br>ATCGG |
| pBAD33-c-6His-Rv1045-D82A  | Expressing TglT D82A mutant with C-terminal-6×His  | TglT-D82A-His  | L-arabinose | chloramphenicol | Forward:<br>CTCAAAGACTT<br>CGCAACGGTCGC<br>ACGTC<br>Reverse:<br>GACGTGCGACCG<br>TTGCGAAGTCTT<br>TGGAG  |
| pBAD33-c-6His-Rv1045-E146Q | Expressing TglT E146Q mutant with C-terminal-6×His | TglT-E146Q-His | L-arabinose | chloramphenicol | Forward:<br>CAACTGTTCCGA<br>TCCAGGTCTCCT<br>CCGTC<br>Reverse:<br>GACGGAGGAGA<br>CCTGGATCGGAA<br>CAGTTG |
| pBAD33-c-6His-Rv1045-K189N | Expressing TglT K189N mutant with C-terminal-6×His | TglT-K189N-His | L-arabinose | chloramphenicol | Forward:<br>CAAATCGCGCAG<br>AACCTGCACGCA<br>GTAAC<br>Reverse:<br>GTTACTGCGTGC                          |

|                            |                                                    |                |             |                 |                                                                                                                                       |
|----------------------------|----------------------------------------------------|----------------|-------------|-----------------|---------------------------------------------------------------------------------------------------------------------------------------|
|                            |                                                    |                |             |                 | AGGTTCTGCGCG<br>ATTTG                                                                                                                 |
| pBAD33-c-6His-Rv1045-D208A | Expressing TglT D208A mutant with C-terminal-6xHis | TglT-D208A-His | L-arabinose | chloramphenicol | Forward:<br>ACCGCGCTCACG<br>CACTGGTGGACT<br>TGCAGCTTCTT<br>Reverse:<br>AAGAAGCTGCA<br>AGTCCACCAGTG<br>CGTGAGCGCGGT                    |
| pET28a-c-FLAG-Rv1045       | Expressing TglT with C-terminal FLAG tag           | TglT-FLAG      | IPTG        | kanamycin       | Forward:<br>GTCGCCATGGGA<br>GTGACCAAGCCC<br>TATTC<br>Reverse:<br>TCTGCTCGAGTC<br>ACTTGTCGTCAT<br>CGTCTTTGTAGT<br>CTCTTTTCGTCG<br>CCCG |
| pBAD/Myc-His A             | Expression plasmid                                 | None           | L-arabinose | ampicillin      |                                                                                                                                       |
| pBAD/Myc-His-Rv1044        | Expressing C-terminal Myc and 6xHis tagged TakA    | TakA-Myc       | L-arabinose | ampicillin      | Forward:<br>GTCGCCATGGGA<br>TTGTGTGCAAAA<br>CCGTATCT<br>Reverse:<br>TCTGAAGCTTCG<br>CCGATGCTCGCT<br>TC                                |

|                  |                                                        |               |      |            |                                                                                                  |
|------------------|--------------------------------------------------------|---------------|------|------------|--------------------------------------------------------------------------------------------------|
| pMAL-c5X         | Expression vector for producing MBP fusion protein     | MBP           | IPTG | ampicillin |                                                                                                  |
| pMAL-Rv1044      | Expressing N-terminal MBP-tagged TakA                  | MBP-TakA      | IPTG | ampicillin | Forward:<br>GTCGCATATGTTG<br>TGTGCAAAACCG<br>Reverse:<br>TCTGGAATTCTC<br>ACGCCGATGCTC<br>GCTTCGG |
| pMAL-Rv1044-G71A | Expressing N-terminal MBP-tagged TakA with G71A mutant | MBP-TakA G71A | IPTG | ampicillin | Forward:<br>GCTGCCGCGTGC<br>AGAGCACGACG<br>AT<br>Reverse:<br>ATCGTCGTGCTC<br>TGCACGCGGCAG<br>C   |
| pMAL-Rv1044-E72A | Expressing N-terminal MBP-tagged TakA with E72A mutant | MBP-TakA E72A | IPTG | ampicillin | Forward:<br>CTGCCGCGTGGT<br>GCGCACGACGAT<br>C<br>Reverse:<br>GATCGTCGTGCG<br>CACCACGCGGCA<br>G   |
| pMAL-Rv1044-D74A | Expressing N-terminal MBP-tagged TakA with D74A mutant | MBP-TakA D74A | IPTG | ampicillin | Forward:<br>CGTGGTGAGCAC<br>GCCGATCTCGCA<br>G<br>Reverse:<br>CTGCCGAGATCGG<br>CGTGCTCACCAC<br>G  |
| pMAL-Rv1044-S93A | Expressing N-terminal MBP-tagged TakA with             | MBP-TakA S93A | IPTG | ampicillin | Forward:<br>GTTATCTCGCATG<br>AGGCAGCCTTGG<br>CGCTTCATG                                           |

|                    |                                                                        |                |                           |            |                                                                                                                |
|--------------------|------------------------------------------------------------------------|----------------|---------------------------|------------|----------------------------------------------------------------------------------------------------------------|
|                    | S93A mutant                                                            |                |                           |            | Reverse:<br>CATGAAGCGCCA<br>AGGCTGCCTCAT<br>GCGAGATAAC                                                         |
| pMAL-Rv1044-H98A   | Expressing N-terminal MBP-tagged TakA with H98A mutant                 | MBP-TakA H98A  | IPTG                      | ampicillin | Forward:<br>CCTTGGCGCTTG<br>CAGCCCTCGCTG<br>A<br>Reverse:<br>TCAGCGAGGGCT<br>GCAAGCGCCAA<br>GG                 |
| pMAL-Rv1044-D105A  | Expressing N-terminal MBP-tagged TakA with D105A mutant                | MBP-TakA D105A | IPTG                      | ampicillin | Forward:<br>CTGACGTGAACG<br>CGTCGCGCATCC<br>ATCTCA<br>Reverse:<br>TGAGATGGATGC<br>GCGACGCGTTCA<br>CGTCAG       |
| pMAL-Rv1044D155A   | Expressing N-terminal MBP-tagged TakA with D155A mutant                | MBP-TakA D155A | IPTG                      | ampicillin | Forward:<br>CACCATCAAAGC<br>CTGCGTGAAGAC<br>GG<br>Reverse:<br>CCGTCTTCACGC<br>AGGCTTTGATGG<br>TG               |
| pYC601             | Shuttle vector containing anhydrotetracycline (ATC)-inducible promoter | None           | Anhydrotetracycline (ATC) | hygromycin |                                                                                                                |
| pYC601-Rv1044/1045 | Expressing TakA and TglT                                               | TakA-TglT      | Anhydrotetracycline (ATC) | hygromycin | Forward:<br>TCCGCATGCGGA<br>GGAATCAGTTGT<br>GTGCAAAACCGT<br>ATCT<br>Reverse:<br>GTCCCCAATTAAT<br>TAGCTAATCATCT |

|                   |                          |      |                                  |            |                                                                                                                                     |
|-------------------|--------------------------|------|----------------------------------|------------|-------------------------------------------------------------------------------------------------------------------------------------|
|                   |                          |      |                                  |            | TTCGTCGCCCG<br>AT                                                                                                                   |
| pYC601-<br>Rv1044 | Expressing<br>TakA alone | TakA | Anhydrotetra<br>cycline<br>(ATC) | hygromycin | Forward:<br>TCCGCATGCGGA<br>GGAATCAGTTGT<br>GTGCAAACCGT<br>ATCT<br>Reverse:<br>GTCCCCAATTAAT<br>TAGCTAATCACG<br>CCGATGCTCGCT<br>TCG |

238

239

240 **Supplementary Table 3 The sequence upstream of predicted *Rv1044* gene used in this**

241 **study**

|                                                  |                                                                                                                                                                                                                                                                                                                                                                                                                                                                                                                                                                                                                                    |
|--------------------------------------------------|------------------------------------------------------------------------------------------------------------------------------------------------------------------------------------------------------------------------------------------------------------------------------------------------------------------------------------------------------------------------------------------------------------------------------------------------------------------------------------------------------------------------------------------------------------------------------------------------------------------------------------|
| The promoter sequence of predicted <i>Rv1044</i> | GGGTCCCAACCGAGCGGCAGCAGAAGTCC<br>CGCGCGTTCCATCGAGCTGAGGATGCGGTG<br>GAGGGTCACCGCGTCGCCCGC<br>GGCGGGCAGGCCGAGGGTGCTCAGGTATC<br>GGGAGAAATCTGCGACCGACCACGGTTCG<br>AAGGGCACCGTCGTCGGCAGAC<br>CGATATCCGAGTCAACCGGTGGTGGTTCGG<br>GTTTGCCGATCGCCGCCGAACCACCGGT<br>TGTGGACCAGCCCGAAGAAT<br>TGATGGGCGCACATCGCCACGTTACACGC<br>CACGCAGGAGTCCCGGGCTTCAGGTCGGC<br>CGCCGTGAGCTGTCGCGGTCA<br>GGTGCTTTCCGCGCCATCCGCCGTCACCTC<br>TGCCATGGTCCATCTACGGTATCTGCGACA<br>AGGGCAGCGTCGATGCCTCG<br>ACATGCAGAGTCGGTGTTGCTTCACGCGA<br>ACTAGGCGCGCTAGCCTGGACGAGTCCCC<br>GGGCCGACATTCGCCCGAGG<br>CCTTGGCCTCCATCACCTAATTGTGTGCAA<br>AACCGTATCTAATTGATACGATTGCGCAC |
|--------------------------------------------------|------------------------------------------------------------------------------------------------------------------------------------------------------------------------------------------------------------------------------------------------------------------------------------------------------------------------------------------------------------------------------------------------------------------------------------------------------------------------------------------------------------------------------------------------------------------------------------------------------------------------------------|

242

243

244 **References**

245 1 Boitel, B. *et al.* PknB kinase activity is regulated by phosphorylation in two Thr residues and  
246 dephosphorylation by PstP, the cognate phospho-Ser/Thr phosphatase, in *Mycobacterium*  
247 *tuberculosis*. *Molecular microbiology* **49**, 1493-1508 (2003).  
248
