# Supplementary material
Source: PubMed Central journal article supplement (PMC7206125)
Supplement: 42003_2020_941_MOESM4_ESM.pdf [file 42003_2020_941_MOESM4_ESM.pdf]

## Description of Additional Supplementary Files

**File Name: Supplementary Data 1**

**Description:** contains the original RNA-seq data underlying Supplementary Fig.15

**File Name: Supplementary Data 2**

**Description:** source data file contains the original data underlying Figs.1B-G,3E,4C,5A-C,6A,7B and Supplementary Fig.2,11,12,14

**File Name: Supplementary Data 3**

**Description:** Full results of the Dali search
