# Supplementary material
Source: PubMed Central journal article supplement (PMC7206125)
Supplement: 42003_2020_941_MOESM6_ESM.pdf [file 42003_2020_941_MOESM6_ESM.pdf]

**Editorial Note:** *This manuscript has been previously reviewed at another Nature Research journal. The manuscript was considered suitable for publication without further review at Communications Biology.*
