# Supplementary material
Source: PubMed Central journal article supplement (PMC7206125)
Supplement: 42003_2020_941_MOESM7_ESM.pdf [file 42003_2020_941_MOESM7_ESM.pdf]

# Results

[Parseable data](#)

Matches to [PDB90](#)

- [mol1A](#)

## Query: mol1A

Select neighbours (check boxes) for viewing as multiple structural alignment or 3D superimposition. The list of neighbours is sorted by Z-score. Similarities with a Z-score lower than 2 are spurious. Each neighbour has links to pairwise structural alignment with the query structure, to pre-computed structural neighbours in the Dali Database, and to the PDB format coordinate file where the neighbour is superimposed onto the query structure.

Structural Alignment  Expand gaps  3D Superimposition (Jmol Applet)  Sequence Similarity Search  Reset Selection

## Summary

| No:                      | Chain | Z                      | rmsd | lali | nres | %id | PDB                    | Description                                                   |
|--------------------------|-------|------------------------|------|------|------|-----|------------------------|---------------------------------------------------------------|
| <input type="checkbox"/> | 1:    | <a href="#">4ok0-A</a> | 14.4 | 4.1  | 199  | 225 | 16 <a href="#">PDB</a> | MOLECULE: PUTATIVE;                                           |
| <input type="checkbox"/> | 2:    | <a href="#">4ok0-B</a> | 14.4 | 4.2  | 204  | 227 | 16 <a href="#">PDB</a> | MOLECULE: PUTATIVE;                                           |
| <input type="checkbox"/> | 3:    | <a href="#">4o8s-A</a> | 14.1 | 4.1  | 204  | 232 | 15 <a href="#">PDB</a> | MOLECULE: PUTATIVE;                                           |
| <input type="checkbox"/> | 4:    | <a href="#">5cfu-A</a> | 11.3 | 3.6  | 153  | 174 | 10 <a href="#">PDB</a> | MOLECULE: AMINOGLYCOSIDE NUCLEOTIDYLTRANSFERASE (2'')-IA;     |
| <input type="checkbox"/> | 5:    | <a href="#">5cft-A</a> | 11.2 | 3.4  | 151  | 175 | 10 <a href="#">PDB</a> | MOLECULE: AMINOGLYCOSIDE NUCLEOTIDYLTRANSFERASE (2'')-IA;     |
| <input type="checkbox"/> | 6:    | <a href="#">5cfs-A</a> | 11.1 | 3.5  | 152  | 176 | 10 <a href="#">PDB</a> | MOLECULE: AAD(2''), GENTAMICIN 2''-NUCLEOTIDYLTRANSFERASE, GE |
| <input type="checkbox"/> | 7:    | <a href="#">4xje-A</a> | 11.1 | 3.8  | 153  | 175 | 11 <a href="#">PDB</a> | MOLECULE: AADB;                                               |
| <input type="checkbox"/> | 8:    | <a href="#">4wql-A</a> | 11.1 | 3.7  | 153  | 175 | 10 <a href="#">PDB</a> | MOLECULE: 2''-AMINOGLYCOSIDE NUCLEOTIDYLTRANSFERASE;          |
| <input type="checkbox"/> | 9:    | <a href="#">4wqk-A</a> | 10.6 | 3.7  | 156  | 175 | 12 <a href="#">PDB</a> | MOLECULE: 2''-AMINOGLYCOSIDE NUCLEOTIDYLTRANSFERASE;          |
| <input type="checkbox"/> | 10:   | <a href="#">4e8j-B</a> | 9.6  | 3.0  | 133  | 158 | 11 <a href="#">PDB</a> | MOLECULE: LINCOSAMIDE RESISTANCE PROTEIN;                     |
| <input type="checkbox"/> | 11:   | <a href="#">2ewr-A</a> | 9.5  | 3.3  | 139  | 156 | 9 <a href="#">PDB</a>  | MOLECULE: HYPOTHETICAL PROTEIN TM1012;                        |
| <input type="checkbox"/> | 12:   | <a href="#">2fc1-A</a> | 9.4  | 3.3  | 140  | 157 | 9 <a href="#">PDB</a>  | MOLECULE: HYPOTHETICAL PROTEIN TM1012;                        |
| <input type="checkbox"/> | 13:   | <a href="#">4e8i-B</a> | 9.2  | 3.0  | 134  | 158 | 11 <a href="#">PDB</a> | MOLECULE: LINCOSAMIDE RESISTANCE PROTEIN;                     |
| <input type="checkbox"/> | 14:   | <a href="#">4fol-B</a> | 9.2  | 3.1  | 134  | 158 | 11 <a href="#">PDB</a> | MOLECULE: LINCOSAMIDE RESISTANCE PROTEIN;                     |
| <input type="checkbox"/> | 15:   | <a href="#">4wh5-B</a> | 9.1  | 3.0  | 133  | 158 | 11 <a href="#">PDB</a> | MOLECULE: LINCOSAMIDE RESISTANCE PROTEIN;                     |
| <input type="checkbox"/> | 16:   | <a href="#">4fol-A</a> | 9.1  | 3.1  | 134  | 158 | 11 <a href="#">PDB</a> | MOLECULE: LINCOSAMIDE RESISTANCE PROTEIN;                     |
| <input type="checkbox"/> | 17:   | <a href="#">4wh5-A</a> | 9.1  | 2.9  | 132  | 158 | 11 <a href="#">PDB</a> | MOLECULE: LINCOSAMIDE RESISTANCE PROTEIN;                     |
| <input type="checkbox"/> | 18:   | <a href="#">4e8j-A</a> | 9.1  | 2.9  | 132  | 158 | 11 <a href="#">PDB</a> | MOLECULE: LINCOSAMIDE RESISTANCE PROTEIN;                     |
| <input type="checkbox"/> | 19:   | <a href="#">4e8i-A</a> | 9.1  | 3.1  | 135  | 158 | 11 <a href="#">PDB</a> | MOLECULE: LINCOSAMIDE RESISTANCE PROTEIN;                     |
| <input type="checkbox"/> | 20:   | <a href="#">4wse-B</a> | 8.9  | 4.8  | 176  | 495 | 9 <a href="#">PDB</a>  | MOLECULE: PUTATIVE POLY(A) POLYMERASE CATALYTIC SUBUNIT;      |
| <input type="checkbox"/> | 21:   | <a href="#">4hx0-A</a> | 8.5  | 2.9  | 132  | 161 | 8 <a href="#">PDB</a>  | MOLECULE: PUTATIVE NUCLEOTIDYLTRANSFERASE TM1012;             |
| <input type="checkbox"/> | 22:   | <a href="#">4tur-A</a> | 7.4  | 5.2  | 116  | 327 | 10 <a href="#">PDB</a> | MOLECULE: DNA POLYMERASE BETA;                                |
| <input type="checkbox"/> | 23:   | <a href="#">4p37-A</a> | 7.3  | 4.8  | 165  | 498 | 10 <a href="#">PDB</a> | MOLECULE: PUTATIVE POLY(A) POLYMERASE CATALYTIC SUBUNIT;      |
| <input type="checkbox"/> | 24:   | <a href="#">5j29-A</a> | 7.3  | 5.1  | 117  | 326 | 10 <a href="#">PDB</a> | MOLECULE: DNA POLYMERASE BETA;                                |
| <input type="checkbox"/> | 25:   | <a href="#">4p2h-A</a> | 7.3  | 4.1  | 112  | 324 | 10 <a href="#">PDB</a> | MOLECULE: DNA POLYMERASE BETA;                                |
| <input type="checkbox"/> | 26:   | <a href="#">4yn4-A</a> | 7.3  | 4.9  | 117  | 327 | 10 <a href="#">PDB</a> | MOLECULE: DNA POLYMERASE BETA;                                |
| <input type="checkbox"/> | 27:   | <a href="#">4pgq-A</a> | 7.3  | 4.2  | 114  | 324 | 10 <a href="#">PDB</a> | MOLECULE: DNA POLYMERASE BETA;                                |
| <input type="checkbox"/> | 28:   | <a href="#">5j0v-A</a> | 7.3  | 4.1  | 113  | 326 | 10 <a href="#">PDB</a> | MOLECULE: DNA POLYMERASE BETA;                                |
| <input type="checkbox"/> | 29:   | <a href="#">5j0u-A</a> | 7.3  | 4.1  | 113  | 326 | 10 <a href="#">PDB</a> | MOLECULE: DNA POLYMERASE BETA;                                |
| <input type="checkbox"/> | 30:   | <a href="#">4mf8-A</a> | 7.3  | 4.7  | 114  | 318 | 11 <a href="#">PDB</a> | MOLECULE: DNA POLYMERASE BETA;                                |
| <input type="checkbox"/> | 31:   | <a href="#">4f5q-A</a> | 7.3  | 5.4  | 121  | 320 | 10 <a href="#">PDB</a> | MOLECULE: DNA POLYMERASE BETA;                                |
| <input type="checkbox"/> | 32:   | <a href="#">4f5n-A</a> | 7.3  | 4.7  | 115  | 323 | 10 <a href="#">PDB</a> | MOLECULE: DNA POLYMERASE BETA;                                |
| <input type="checkbox"/> | 33:   | <a href="#">2bpg-B</a> | 7.3  | 5.0  | 122  | 324 | 10 <a href="#">PDB</a> | MOLECULE: DNA POLYMERASE BETA;                                |
| <input type="checkbox"/> | 34:   | <a href="#">1zjm-A</a> | 7.3  | 4.7  | 115  | 323 | 10 <a href="#">PDB</a> | MOLECULE: DNA POLYMERASE BETA;                                |
| <input type="checkbox"/> | 35:   | <a href="#">1zqz-A</a> | 7.3  | 4.7  | 114  | 242 | 10 <a href="#">PDB</a> | MOLECULE: DNA POLYMERASE BETA;                                |
| <input type="checkbox"/> | 36:   | <a href="#">4r66-A</a> | 7.3  | 4.9  | 116  | 326 | 10 <a href="#">PDB</a> | MOLECULE: DNA POLYMERASE BETA;                                |
| <input type="checkbox"/> | 37:   | <a href="#">4ny8-A</a> | 7.3  | 5.0  | 121  | 323 | 8 <a href="#">PDB</a>  | MOLECULE: DNA POLYMERASE BETA;                                |
| <input type="checkbox"/> | 38:   | <a href="#">4ppx-A</a> | 7.3  | 4.7  | 115  | 314 | 10 <a href="#">PDB</a> | MOLECULE: DNA POLYMERASE BETA;                                |
| <input type="checkbox"/> | 39:   | <a href="#">4tup-A</a> | 7.2  | 4.2  | 112  | 326 | 10 <a href="#">PDB</a> | MOLECULE: DNA POLYMERASE BETA;                                |

|                          |      |                        |     |     |     |     |    |                     |                                                               |
|--------------------------|------|------------------------|-----|-----|-----|-----|----|---------------------|---------------------------------------------------------------|
| <input type="checkbox"/> | 40:  | <a href="#">5tzv-A</a> | 7.2 | 4.9 | 116 | 328 | 10 | <a href="#">PDB</a> | MOLECULE: DNA POLYMERASE BETA;                                |
| <input type="checkbox"/> | 41:  | <a href="#">5j0t-A</a> | 7.2 | 4.9 | 116 | 327 | 10 | <a href="#">PDB</a> | MOLECULE: DNA POLYMERASE BETA;                                |
| <input type="checkbox"/> | 42:  | <a href="#">4pgy-A</a> | 7.2 | 4.8 | 117 | 327 | 10 | <a href="#">PDB</a> | MOLECULE: DNA POLYMERASE BETA;                                |
| <input type="checkbox"/> | 43:  | <a href="#">5dbb-A</a> | 7.2 | 4.9 | 116 | 327 | 10 | <a href="#">PDB</a> | MOLECULE: DNA POLYMERASE BETA;                                |
| <input type="checkbox"/> | 44:  | <a href="#">5j0o-A</a> | 7.2 | 4.9 | 116 | 327 | 10 | <a href="#">PDB</a> | MOLECULE: DNA POLYMERASE BETA;                                |
| <input type="checkbox"/> | 45:  | <a href="#">3uxn-A</a> | 7.2 | 4.6 | 115 | 325 | 9  | <a href="#">PDB</a> | MOLECULE: DNA POLYMERASE BETA;                                |
| <input type="checkbox"/> | 46:  | <a href="#">3uxo-A</a> | 7.2 | 5.2 | 119 | 325 | 9  | <a href="#">PDB</a> | MOLECULE: DNA POLYMERASE BETA;                                |
| <input type="checkbox"/> | 47:  | <a href="#">1tv9-A</a> | 7.2 | 5.3 | 121 | 331 | 10 | <a href="#">PDB</a> | MOLECULE: DNA POLYMERASE BETA;                                |
| <input type="checkbox"/> | 48:  | <a href="#">3isc-A</a> | 7.2 | 4.6 | 114 | 327 | 10 | <a href="#">PDB</a> | MOLECULE: DNA POLYMERASE BETA;                                |
| <input type="checkbox"/> | 49:  | <a href="#">3isb-A</a> | 7.2 | 4.6 | 116 | 327 | 9  | <a href="#">PDB</a> | MOLECULE: DNA POLYMERASE BETA;                                |
| <input type="checkbox"/> | 50:  | <a href="#">2van-A</a> | 7.2 | 4.7 | 112 | 240 | 11 | <a href="#">PDB</a> | MOLECULE: DNA POLYMERSE BETA;                                 |
| <input type="checkbox"/> | 51:  | <a href="#">1jn3-A</a> | 7.2 | 4.7 | 113 | 242 | 10 | <a href="#">PDB</a> | MOLECULE: DNA POLYMERASE BETA;                                |
| <input type="checkbox"/> | 52:  | <a href="#">2i9g-A</a> | 7.2 | 4.7 | 115 | 325 | 10 | <a href="#">PDB</a> | MOLECULE: DNA POLYMERASE BETA;                                |
| <input type="checkbox"/> | 53:  | <a href="#">4o5c-A</a> | 7.2 | 4.3 | 113 | 327 | 10 | <a href="#">PDB</a> | MOLECULE: DNA POLYMERASE BETA;                                |
| <input type="checkbox"/> | 54:  | <a href="#">5j0y-A</a> | 7.2 | 4.9 | 117 | 327 | 10 | <a href="#">PDB</a> | MOLECULE: DNA POLYMERASE BETA;                                |
| <input type="checkbox"/> | 55:  | <a href="#">5db6-A</a> | 7.2 | 4.2 | 114 | 327 | 10 | <a href="#">PDB</a> | MOLECULE: DNA POLYMERASE BETA;                                |
| <input type="checkbox"/> | 56:  | <a href="#">4nln-A</a> | 7.2 | 4.7 | 119 | 326 | 8  | <a href="#">PDB</a> | MOLECULE: DNA POLYMERASE BETA;                                |
| <input type="checkbox"/> | 57:  | <a href="#">4o9m-A</a> | 7.2 | 5.0 | 120 | 326 | 9  | <a href="#">PDB</a> | MOLECULE: DNA (5' -D (*CP*CP*GP*AP*CP*AP*GP*CP*GP*CP*AP*TP*CP |
| <input type="checkbox"/> | 58:  | <a href="#">4m9l-A</a> | 7.2 | 5.2 | 124 | 313 | 10 | <a href="#">PDB</a> | MOLECULE: DNA POLYMERASE BETA;                                |
| <input type="checkbox"/> | 59:  | <a href="#">5j0r-A</a> | 7.2 | 4.9 | 116 | 327 | 10 | <a href="#">PDB</a> | MOLECULE: DNA POLYMERASE BETA;                                |
| <input type="checkbox"/> | 60:  | <a href="#">4r63-A</a> | 7.2 | 4.2 | 112 | 327 | 10 | <a href="#">PDB</a> | MOLECULE: DNA POLYMERASE BETA;                                |
| <input type="checkbox"/> | 61:  | <a href="#">5dbc-A</a> | 7.2 | 4.2 | 113 | 327 | 10 | <a href="#">PDB</a> | MOLECULE: DNA POLYMERASE BETA;                                |
| <input type="checkbox"/> | 62:  | <a href="#">5dba-A</a> | 7.2 | 4.9 | 116 | 327 | 10 | <a href="#">PDB</a> | MOLECULE: DNA POLYMERASE BETA;                                |
| <input type="checkbox"/> | 63:  | <a href="#">3lqc-B</a> | 7.2 | 4.6 | 116 | 193 | 9  | <a href="#">PDB</a> | MOLECULE: DNA REPAIR PROTEIN XRCC1;                           |
| <input type="checkbox"/> | 64:  | <a href="#">5j0q-A</a> | 7.1 | 4.9 | 116 | 330 | 10 | <a href="#">PDB</a> | MOLECULE: DNA POLYMERASE BETA;                                |
| <input type="checkbox"/> | 65:  | <a href="#">5j0w-A</a> | 7.1 | 4.3 | 113 | 329 | 10 | <a href="#">PDB</a> | MOLECULE: DNA POLYMERASE BETA;                                |
| <input type="checkbox"/> | 66:  | <a href="#">5j0p-A</a> | 7.1 | 4.3 | 112 | 330 | 10 | <a href="#">PDB</a> | MOLECULE: DNA POLYMERASE BETA;                                |
| <input type="checkbox"/> | 67:  | <a href="#">4ub2-A</a> | 7.1 | 4.9 | 116 | 319 | 10 | <a href="#">PDB</a> | MOLECULE: DNA POLYMERASE BETA;                                |
| <input type="checkbox"/> | 68:  | <a href="#">5db8-A</a> | 7.1 | 4.2 | 112 | 327 | 10 | <a href="#">PDB</a> | MOLECULE: DNA POLYMERASE BETA;                                |
| <input type="checkbox"/> | 69:  | <a href="#">5db9-A</a> | 7.1 | 4.3 | 113 | 327 | 10 | <a href="#">PDB</a> | MOLECULE: DNA POLYMERASE BETA;                                |
| <input type="checkbox"/> | 70:  | <a href="#">4kli-A</a> | 7.1 | 5.0 | 120 | 326 | 10 | <a href="#">PDB</a> | MOLECULE: 5' -D (*CP*CP*GP*AP*CP*GP*GP*CP*GP*CP*AP*TP*CP*AP*G |
| <input type="checkbox"/> | 71:  | <a href="#">4klo-A</a> | 7.1 | 5.0 | 120 | 326 | 10 | <a href="#">PDB</a> | MOLECULE: 5' -D (*CP*CP*GP*AP*CP*GP*GP*CP*GP*CP*AP*TP*CP*AP*G |
| <input type="checkbox"/> | 72:  | <a href="#">4klf-A</a> | 7.1 | 5.1 | 121 | 326 | 10 | <a href="#">PDB</a> | MOLECULE: 5' -D (*CP*CP*GP*AP*CP*GP*GP*CP*GP*CP*AP*TP*CP*AP*G |
| <input type="checkbox"/> | 73:  | <a href="#">4klj-A</a> | 7.1 | 5.0 | 120 | 326 | 10 | <a href="#">PDB</a> | MOLECULE: 5' -D (*CP*CP*GP*AP*CP*GP*GP*CP*GP*CP*AP*TP*CP*AP*G |
| <input type="checkbox"/> | 74:  | <a href="#">4gxx-A</a> | 7.1 | 5.1 | 120 | 316 | 10 | <a href="#">PDB</a> | MOLECULE: DNA POLYMERASE BETA;                                |
| <input type="checkbox"/> | 75:  | <a href="#">4klm-A</a> | 7.1 | 5.0 | 120 | 326 | 10 | <a href="#">PDB</a> | MOLECULE: 5' -D (*CP*CP*GP*AP*CP*GP*GP*CP*GP*CP*AP*TP*CP*AP*G |
| <input type="checkbox"/> | 76:  | <a href="#">4klg-A</a> | 7.1 | 5.0 | 120 | 326 | 10 | <a href="#">PDB</a> | MOLECULE: 5' -D (*CP*CP*GP*AP*CP*GP*GP*CP*GP*CP*AP*TP*CP*AP*G |
| <input type="checkbox"/> | 77:  | <a href="#">3v7j-A</a> | 7.1 | 4.8 | 118 | 327 | 9  | <a href="#">PDB</a> | MOLECULE: DNA POLYMERASE BETA;                                |
| <input type="checkbox"/> | 78:  | <a href="#">3v7k-A</a> | 7.1 | 4.9 | 118 | 331 | 9  | <a href="#">PDB</a> | MOLECULE: DNA POLYMERASE BETA;                                |
| <input type="checkbox"/> | 79:  | <a href="#">3ogu-A</a> | 7.1 | 4.7 | 114 | 326 | 10 | <a href="#">PDB</a> | MOLECULE: DNA POLYMERASE BETA;                                |
| <input type="checkbox"/> | 80:  | <a href="#">3rje-A</a> | 7.1 | 4.9 | 116 | 328 | 9  | <a href="#">PDB</a> | MOLECULE: DNA POLYMERASE BETA;                                |
| <input type="checkbox"/> | 81:  | <a href="#">4f5o-A</a> | 7.1 | 4.7 | 115 | 321 | 10 | <a href="#">PDB</a> | MOLECULE: DNA POLYMERASE BETA;                                |
| <input type="checkbox"/> | 82:  | <a href="#">1tva-A</a> | 7.1 | 4.7 | 114 | 331 | 10 | <a href="#">PDB</a> | MOLECULE: DNA POLYMERASE BETA;                                |
| <input type="checkbox"/> | 83:  | <a href="#">4f5r-A</a> | 7.1 | 4.7 | 114 | 325 | 10 | <a href="#">PDB</a> | MOLECULE: DNA POLYMERASE BETA;                                |
| <input type="checkbox"/> | 84:  | <a href="#">4gxi-A</a> | 7.1 | 4.7 | 115 | 328 | 10 | <a href="#">PDB</a> | MOLECULE: DNA POLYMERASE BETA;                                |
| <input type="checkbox"/> | 85:  | <a href="#">4klu-A</a> | 7.1 | 4.9 | 115 | 322 | 10 | <a href="#">PDB</a> | MOLECULE: DNA POLYMERASE BETA;                                |
| <input type="checkbox"/> | 86:  | <a href="#">lnom-A</a> | 7.1 | 4.4 | 112 | 242 | 10 | <a href="#">PDB</a> | MOLECULE: DNA POLYMERASE BETA;                                |
| <input type="checkbox"/> | 87:  | <a href="#">2fmp-A</a> | 7.1 | 5.2 | 121 | 326 | 10 | <a href="#">PDB</a> | MOLECULE: 5' -                                                |
| <input type="checkbox"/> | 88:  | <a href="#">1huo-A</a> | 7.1 | 5.3 | 125 | 325 | 10 | <a href="#">PDB</a> | MOLECULE: DNA POLYMERASE BETA;                                |
| <input type="checkbox"/> | 89:  | <a href="#">3rjk-A</a> | 7.1 | 5.0 | 120 | 326 | 10 | <a href="#">PDB</a> | MOLECULE: DNA POLYMERASE BETA;                                |
| <input type="checkbox"/> | 90:  | <a href="#">5j2d-A</a> | 7.1 | 5.1 | 117 | 326 | 10 | <a href="#">PDB</a> | MOLECULE: DNA POLYMERASE BETA;                                |
| <input type="checkbox"/> | 91:  | <a href="#">4m2y-A</a> | 7.1 | 5.2 | 122 | 319 | 8  | <a href="#">PDB</a> | MOLECULE: DNA POLYMERASE BETA;                                |
| <input type="checkbox"/> | 92:  | <a href="#">1zqy-A</a> | 7.1 | 4.7 | 115 | 242 | 10 | <a href="#">PDB</a> | MOLECULE: DNA POLYMERASE BETA;                                |
| <input type="checkbox"/> | 93:  | <a href="#">1zqx-A</a> | 7.1 | 5.1 | 116 | 242 | 9  | <a href="#">PDB</a> | MOLECULE: DNA POLYMERASE BETA;                                |
| <input type="checkbox"/> | 94:  | <a href="#">1bpb-A</a> | 7.1 | 4.7 | 115 | 242 | 10 | <a href="#">PDB</a> | MOLECULE: DNA POLYMERASE BETA;                                |
| <input type="checkbox"/> | 95:  | <a href="#">2bpc-A</a> | 7.1 | 4.7 | 116 | 242 | 9  | <a href="#">PDB</a> | MOLECULE: DNA POLYMERASE BETA;                                |
| <input type="checkbox"/> | 96:  | <a href="#">5j0s-A</a> | 7.1 | 4.9 | 118 | 327 | 10 | <a href="#">PDB</a> | MOLECULE: DNA POLYMERASE BETA;                                |
| <input type="checkbox"/> | 97:  | <a href="#">4m47-A</a> | 7.1 | 5.4 | 125 | 314 | 10 | <a href="#">PDB</a> | MOLECULE: DNA POLYMERASE BETA;                                |
| <input type="checkbox"/> | 98:  | <a href="#">4nlz-A</a> | 7.1 | 5.4 | 125 | 323 | 10 | <a href="#">PDB</a> | MOLECULE: DNA POLYMERASE BETA;                                |
| <input type="checkbox"/> | 99:  | <a href="#">4nm2-A</a> | 7.1 | 5.0 | 122 | 321 | 9  | <a href="#">PDB</a> | MOLECULE: DNA POLYMERASE BETA;                                |
| <input type="checkbox"/> | 100: | <a href="#">4phd-A</a> | 7.1 | 4.6 | 116 | 326 | 10 | <a href="#">PDB</a> | MOLECULE: DNA POLYMERASE BETA;                                |
| <input type="checkbox"/> | 101: | <a href="#">4m9h-A</a> | 7.1 | 4.8 | 117 | 314 | 9  | <a href="#">PDB</a> | MOLECULE: DNA POLYMERASE BETA;                                |
| <input type="checkbox"/> | 102: | <a href="#">4mfa-A</a> | 7.1 | 4.8 | 118 | 321 | 10 | <a href="#">PDB</a> | MOLECULE: DNA POLYMERASE BETA;                                |

|                          |      |                        |     |     |     |     |    |                     |                                                             |
|--------------------------|------|------------------------|-----|-----|-----|-----|----|---------------------|-------------------------------------------------------------|
| <input type="checkbox"/> | 103: | <a href="#">4p37-B</a> | 7.0 | 5.1 | 171 | 498 | 9  | <a href="#">PDB</a> | MOLECULE: PUTATIVE POLY(A) POLYMERASE CATALYTIC SUBUNIT;    |
| <input type="checkbox"/> | 104: | <a href="#">4tus-A</a> | 7.0 | 5.2 | 117 | 325 | 10 | <a href="#">PDB</a> | MOLECULE: DNA POLYMERASE BETA;                              |
| <input type="checkbox"/> | 105: | <a href="#">4ub4-A</a> | 7.0 | 5.1 | 117 | 326 | 10 | <a href="#">PDB</a> | MOLECULE: DNA POLYMERASE BETA;                              |
| <input type="checkbox"/> | 106: | <a href="#">5bom-A</a> | 7.0 | 4.9 | 116 | 320 | 10 | <a href="#">PDB</a> | MOLECULE: DNA POLYMERASE BETA;                              |
| <input type="checkbox"/> | 107: | <a href="#">3uxp-A</a> | 7.0 | 5.3 | 123 | 326 | 11 | <a href="#">PDB</a> | MOLECULE: DNA POLYMERASE BETA;                              |
| <input type="checkbox"/> | 108: | <a href="#">4f5r-B</a> | 7.0 | 5.3 | 121 | 321 | 10 | <a href="#">PDB</a> | MOLECULE: DNA POLYMERASE BETA;                              |
| <input type="checkbox"/> | 109: | <a href="#">4kl1-A</a> | 7.0 | 5.1 | 121 | 326 | 10 | <a href="#">PDB</a> | MOLECULE: 5'-D(*CP*CP*GP*AP*CP*GP*GP*CP*GP*CP*AP*TP*CP*AP*G |
| <input type="checkbox"/> | 110: | <a href="#">4doc-A</a> | 7.0 | 5.0 | 120 | 326 | 10 | <a href="#">PDB</a> | MOLECULE: DNA POLYMERASE BETA;                              |
| <input type="checkbox"/> | 111: | <a href="#">1bpy-A</a> | 7.0 | 5.1 | 121 | 326 | 10 | <a href="#">PDB</a> | MOLECULE: PROTEIN (DNA POLYMERASE BETA);                    |
| <input type="checkbox"/> | 112: | <a href="#">4klp-A</a> | 7.0 | 5.0 | 120 | 324 | 10 | <a href="#">PDB</a> | MOLECULE: DNA POLYMERASE BETA;                              |
| <input type="checkbox"/> | 113: | <a href="#">3uxo-B</a> | 7.0 | 5.0 | 120 | 325 | 10 | <a href="#">PDB</a> | MOLECULE: DNA POLYMERASE BETA;                              |
| <input type="checkbox"/> | 114: | <a href="#">3k75-E</a> | 7.0 | 4.6 | 114 | 243 | 10 | <a href="#">PDB</a> | MOLECULE: DNA REPAIR PROTEIN XRCC1;                         |
| <input type="checkbox"/> | 115: | <a href="#">2p66-A</a> | 7.0 | 4.8 | 115 | 326 | 10 | <a href="#">PDB</a> | MOLECULE: DNA POLYMERASE BETA;                              |
| <input type="checkbox"/> | 116: | <a href="#">9ics-A</a> | 7.0 | 4.8 | 116 | 327 | 9  | <a href="#">PDB</a> | MOLECULE: PROTEIN (DNA POLYMERASE BETA (E. C. 2. 7. 7. 7)); |
| <input type="checkbox"/> | 117: | <a href="#">3gdx-A</a> | 7.0 | 5.3 | 126 | 326 | 10 | <a href="#">PDB</a> | MOLECULE: DNA POLYMERASE BETA;                              |
| <input type="checkbox"/> | 118: | <a href="#">3c2l-A</a> | 7.0 | 5.9 | 122 | 326 | 8  | <a href="#">PDB</a> | MOLECULE: DNA POLYMERASE BETA;                              |
| <input type="checkbox"/> | 119: | <a href="#">1rpl-A</a> | 7.0 | 4.7 | 114 | 241 | 10 | <a href="#">PDB</a> | MOLECULE: DNA POLYMERASE BETA;                              |
| <input type="checkbox"/> | 120: | <a href="#">1bpd-A</a> | 7.0 | 4.8 | 117 | 324 | 9  | <a href="#">PDB</a> | MOLECULE: DNA POLYMERASE BETA;                              |
| <input type="checkbox"/> | 121: | <a href="#">4rq7-A</a> | 7.0 | 4.9 | 115 | 325 | 10 | <a href="#">PDB</a> | MOLECULE: DNA POLYMERASE BETA;                              |
| <input type="checkbox"/> | 122: | <a href="#">4m9j-A</a> | 7.0 | 4.6 | 111 | 307 | 9  | <a href="#">PDB</a> | MOLECULE: DNA POLYMERASE BETA;                              |
| <input type="checkbox"/> | 123: | <a href="#">4z6d-A</a> | 7.0 | 5.1 | 118 | 327 | 10 | <a href="#">PDB</a> | MOLECULE: DNA POLYMERASE BETA;                              |
| <input type="checkbox"/> | 124: | <a href="#">4ymn-A</a> | 7.0 | 4.8 | 117 | 327 | 10 | <a href="#">PDB</a> | MOLECULE: DNA POLYMERASE BETA;                              |
| <input type="checkbox"/> | 125: | <a href="#">4ub5-A</a> | 7.0 | 4.6 | 113 | 310 | 11 | <a href="#">PDB</a> | MOLECULE: 5'-D(*CP*CP*GP*AP*CP*CP*GP*CP*GP*CP*AP*TP*CP*AP*G |
| <input type="checkbox"/> | 126: | <a href="#">4kle-A</a> | 7.0 | 5.3 | 125 | 326 | 10 | <a href="#">PDB</a> | MOLECULE: 5'-D(*CP*CP*GP*AP*CP*GP*GP*CP*GP*CP*AP*TP*CP*AP*G |
| <input type="checkbox"/> | 127: | <a href="#">5j2f-A</a> | 6.9 | 5.1 | 117 | 326 | 10 | <a href="#">PDB</a> | MOLECULE: DNA POLYMERASE BETA;                              |
| <input type="checkbox"/> | 128: | <a href="#">5j2c-A</a> | 6.9 | 5.1 | 117 | 326 | 10 | <a href="#">PDB</a> | MOLECULE: DNA POLYMERASE BETA;                              |
| <input type="checkbox"/> | 129: | <a href="#">4phe-A</a> | 6.9 | 4.9 | 116 | 325 | 10 | <a href="#">PDB</a> | MOLECULE: DNA POLYMERASE BETA;                              |
| <input type="checkbox"/> | 130: | <a href="#">4o5e-A</a> | 6.9 | 4.9 | 117 | 327 | 10 | <a href="#">PDB</a> | MOLECULE: DNA POLYMERASE BETA;                              |
| <input type="checkbox"/> | 131: | <a href="#">5db7-A</a> | 6.9 | 4.2 | 114 | 327 | 10 | <a href="#">PDB</a> | MOLECULE: DNA POLYMERASE BETA;                              |
| <input type="checkbox"/> | 132: | <a href="#">3rh4-A</a> | 6.9 | 5.0 | 120 | 326 | 10 | <a href="#">PDB</a> | MOLECULE: 5'-D(*CP*CP*GP*AP*CP*GP*CP*CP*GP*CP*AP*TP*CP*AP*G |
| <input type="checkbox"/> | 133: | <a href="#">4kls-A</a> | 6.9 | 5.3 | 120 | 324 | 10 | <a href="#">PDB</a> | MOLECULE: DNA POLYMERASE BETA;                              |
| <input type="checkbox"/> | 134: | <a href="#">4klt-A</a> | 6.9 | 5.2 | 119 | 314 | 10 | <a href="#">PDB</a> | MOLECULE: DNA POLYMERASE BETA;                              |
| <input type="checkbox"/> | 135: | <a href="#">3uq1-A</a> | 6.9 | 5.1 | 121 | 315 | 8  | <a href="#">PDB</a> | MOLECULE: DNA POLYMERASE LAMBDA;                            |
| <input type="checkbox"/> | 136: | <a href="#">4fo6-A</a> | 6.9 | 5.4 | 122 | 315 | 8  | <a href="#">PDB</a> | MOLECULE: DNA POLYMERASE LAMBDA;                            |
| <input type="checkbox"/> | 137: | <a href="#">1bpz-A</a> | 6.9 | 4.9 | 119 | 331 | 8  | <a href="#">PDB</a> | MOLECULE: PROTEIN (DNA POLYMERASE BETA);                    |
| <input type="checkbox"/> | 138: | <a href="#">2fmq-A</a> | 6.9 | 5.2 | 121 | 326 | 10 | <a href="#">PDB</a> | MOLECULE: DNA POLYMERASE BETA;                              |
| <input type="checkbox"/> | 139: | <a href="#">2bpf-A</a> | 6.9 | 5.2 | 120 | 324 | 10 | <a href="#">PDB</a> | MOLECULE: PROTEIN (DNA POLYMERASE BETA (E. C. 2. 7. 7. 7)); |
| <input type="checkbox"/> | 140: | <a href="#">7icq-A</a> | 6.9 | 4.7 | 116 | 327 | 9  | <a href="#">PDB</a> | MOLECULE: PROTEIN (DNA POLYMERASE BETA (E. C. 2. 7. 7. 7)); |
| <input type="checkbox"/> | 141: | <a href="#">9ict-A</a> | 6.9 | 4.7 | 115 | 327 | 9  | <a href="#">PDB</a> | MOLECULE: PROTEIN (DNA POLYMERASE BETA (E. C. 2. 7. 7. 7)); |
| <input type="checkbox"/> | 142: | <a href="#">9icv-A</a> | 6.9 | 4.8 | 116 | 327 | 9  | <a href="#">PDB</a> | MOLECULE: PROTEIN (DNA POLYMERASE BETA (E. C. 2. 7. 7. 7)); |
| <input type="checkbox"/> | 143: | <a href="#">9ick-A</a> | 6.9 | 4.7 | 114 | 327 | 10 | <a href="#">PDB</a> | MOLECULE: PROTEIN (DNA POLYMERASE BETA (E. C. 2. 7. 7. 7)); |
| <input type="checkbox"/> | 144: | <a href="#">7ich-A</a> | 6.9 | 4.8 | 116 | 327 | 9  | <a href="#">PDB</a> | MOLECULE: PROTEIN (DNA POLYMERASE BETA (E. C. 2. 7. 7. 7)); |
| <input type="checkbox"/> | 145: | <a href="#">7icv-A</a> | 6.9 | 4.7 | 114 | 327 | 10 | <a href="#">PDB</a> | MOLECULE: PROTEIN (DNA POLYMERASE BETA (E. C. 2. 7. 7. 7)); |
| <input type="checkbox"/> | 146: | <a href="#">7icj-A</a> | 6.9 | 4.8 | 117 | 327 | 9  | <a href="#">PDB</a> | MOLECULE: PROTEIN (DNA POLYMERASE BETA (E. C. 2. 7. 7. 7)); |
| <input type="checkbox"/> | 147: | <a href="#">4gxj-A</a> | 6.9 | 5.0 | 120 | 315 | 10 | <a href="#">PDB</a> | MOLECULE: DNA POLYMERASE BETA;                              |
| <input type="checkbox"/> | 148: | <a href="#">5eoz-A</a> | 6.9 | 5.1 | 117 | 326 | 10 | <a href="#">PDB</a> | MOLECULE: DNA POLYMERASE BETA;                              |
| <input type="checkbox"/> | 149: | <a href="#">4mfc-A</a> | 6.9 | 5.5 | 125 | 318 | 9  | <a href="#">PDB</a> | MOLECULE: DNA POLYMERASE BETA;                              |
| <input type="checkbox"/> | 150: | <a href="#">5ddy-C</a> | 6.9 | 5.0 | 123 | 327 | 9  | <a href="#">PDB</a> | MOLECULE: DNA POLYMERASE LAMBDA;                            |
| <input type="checkbox"/> | 151: | <a href="#">3rjg-A</a> | 6.9 | 4.8 | 115 | 326 | 10 | <a href="#">PDB</a> | MOLECULE: DNA POLYMERASE BETA;                              |
| <input type="checkbox"/> | 152: | <a href="#">1zqw-A</a> | 6.9 | 5.1 | 117 | 242 | 9  | <a href="#">PDB</a> | MOLECULE: DNA POLYMERASE BETA;                              |
| <input type="checkbox"/> | 153: | <a href="#">5j0x-A</a> | 6.9 | 4.2 | 112 | 328 | 10 | <a href="#">PDB</a> | MOLECULE: DNA POLYMERASE BETA;                              |
| <input type="checkbox"/> | 154: | <a href="#">4ubl-A</a> | 6.9 | 4.9 | 116 | 317 | 10 | <a href="#">PDB</a> | MOLECULE: DNA POLYMERASE BETA;                              |
| <input type="checkbox"/> | 155: | <a href="#">4mff-A</a> | 6.9 | 5.5 | 125 | 321 | 10 | <a href="#">PDB</a> | MOLECULE: DNA POLYMERASE BETA;                              |
| <input type="checkbox"/> | 156: | <a href="#">4m9g-A</a> | 6.9 | 4.7 | 115 | 314 | 10 | <a href="#">PDB</a> | MOLECULE: DNA POLYMERASE BETA;                              |
| <input type="checkbox"/> | 157: | <a href="#">5j2j-A</a> | 6.9 | 5.1 | 117 | 326 | 10 | <a href="#">PDB</a> | MOLECULE: DNA POLYMERASE BETA;                              |
| <input type="checkbox"/> | 158: | <a href="#">5bol-A</a> | 6.9 | 4.7 | 123 | 325 | 9  | <a href="#">PDB</a> | MOLECULE: DNA (5'-D(*CP*CP*GP*AP*CP*(CDO)                   |
| <input type="checkbox"/> | 159: | <a href="#">4pha-A</a> | 6.9 | 5.1 | 118 | 327 | 10 | <a href="#">PDB</a> | MOLECULE: DNA POLYMERASE BETA;                              |
| <input type="checkbox"/> | 160: | <a href="#">4klq-A</a> | 6.9 | 5.4 | 125 | 324 | 10 | <a href="#">PDB</a> | MOLECULE: DNA POLYMERASE BETA;                              |
| <input type="checkbox"/> | 161: | <a href="#">4f5p-A</a> | 6.9 | 5.4 | 126 | 326 | 10 | <a href="#">PDB</a> | MOLECULE: DNA POLYMERASE BETA;                              |
| <input type="checkbox"/> | 162: | <a href="#">5j2h-A</a> | 6.9 | 5.0 | 120 | 326 | 10 | <a href="#">PDB</a> | MOLECULE: DNA POLYMERASE BETA;                              |
| <input type="checkbox"/> | 163: | <a href="#">4wse-A</a> | 6.8 | 4.0 | 147 | 495 | 11 | <a href="#">PDB</a> | MOLECULE: PUTATIVE POLY(A) POLYMERASE CATALYTIC SUBUNIT;    |
| <input type="checkbox"/> | 164: | <a href="#">4tuq-A</a> | 6.8 | 5.1 | 117 | 326 | 10 | <a href="#">PDB</a> | MOLECULE: DNA POLYMERASE BETA;                              |
| <input type="checkbox"/> | 165: | <a href="#">4o5k-A</a> | 6.8 | 5.1 | 117 | 326 | 10 | <a href="#">PDB</a> | MOLECULE: DNA (5'-D(*CP*CP*GP*AP*CP*(FMG)                   |

|      |                        |     |     |     |     |    |                     |                                                             |
|------|------------------------|-----|-----|-----|-----|----|---------------------|-------------------------------------------------------------|
| 166: | <a href="#">5j2e-A</a> | 6.8 | 5.1 | 117 | 326 | 10 | <a href="#">PDB</a> | MOLECULE: DNA POLYMERASE BETA;                              |
| 167: | <a href="#">5j2g-A</a> | 6.8 | 5.1 | 117 | 326 | 10 | <a href="#">PDB</a> | MOLECULE: DNA POLYMERASE BETA;                              |
| 168: | <a href="#">5j2k-A</a> | 6.8 | 5.1 | 117 | 326 | 10 | <a href="#">PDB</a> | MOLECULE: DNA POLYMERASE BETA;                              |
| 169: | <a href="#">4klh-A</a> | 6.8 | 5.0 | 120 | 326 | 10 | <a href="#">PDB</a> | MOLECULE: 5'-D(*CP*CP*GP*AP*CP*GP*GP*CP*GP*CP*AP*TP*CP*AP*G |
| 170: | <a href="#">4jwm-A</a> | 6.8 | 5.0 | 120 | 326 | 11 | <a href="#">PDB</a> | MOLECULE: DNA POLYMERASE BETA;                              |
| 171: | <a href="#">3rji-A</a> | 6.8 | 5.0 | 120 | 326 | 10 | <a href="#">PDB</a> | MOLECULE: DNA POLYMERASE BETA;                              |
| 172: | <a href="#">4jwn-A</a> | 6.8 | 5.0 | 120 | 326 | 10 | <a href="#">PDB</a> | MOLECULE: DNA POLYMERASE BETA;                              |
| 173: | <a href="#">3rjh-A</a> | 6.8 | 5.0 | 120 | 326 | 10 | <a href="#">PDB</a> | MOLECULE: DNA POLYMERASE BETA;                              |
| 174: | <a href="#">3uxp-B</a> | 6.8 | 5.0 | 120 | 326 | 10 | <a href="#">PDB</a> | MOLECULE: DNA POLYMERASE BETA;                              |
| 175: | <a href="#">3jpb-A</a> | 6.8 | 5.0 | 120 | 326 | 10 | <a href="#">PDB</a> | MOLECULE: DNA POLYMERASE BETA;                              |
| 176: | <a href="#">3rjj-A</a> | 6.8 | 4.6 | 114 | 326 | 10 | <a href="#">PDB</a> | MOLECULE: DNA POLYMERASE BETA;                              |
| 177: | <a href="#">9icp-A</a> | 6.8 | 4.8 | 115 | 327 | 9  | <a href="#">PDB</a> | MOLECULE: PROTEIN (DNA POLYMERASE BETA (E. C. 2. 7. 7. 7)); |
| 178: | <a href="#">8ics-A</a> | 6.8 | 5.0 | 116 | 327 | 9  | <a href="#">PDB</a> | MOLECULE: DNA (5'-D(*CP*AP*TP*TP*AP*GP*AP*A)-3');           |
| 179: | <a href="#">9ico-A</a> | 6.8 | 5.0 | 116 | 327 | 9  | <a href="#">PDB</a> | MOLECULE: PROTEIN (DNA POLYMERASE BETA (E. C. 2. 7. 7. 7)); |
| 180: | <a href="#">lzqa-A</a> | 6.8 | 5.0 | 116 | 327 | 9  | <a href="#">PDB</a> | MOLECULE: PROTEIN (DNA POLYMERASE BETA (E. C. 2. 7. 7. 7)); |
| 181: | <a href="#">lzqn-A</a> | 6.8 | 4.7 | 116 | 327 | 9  | <a href="#">PDB</a> | MOLECULE: PROTEIN (DNA POLYMERASE BETA (E. C. 2. 7. 7. 7)); |
| 182: | <a href="#">9icy-A</a> | 6.8 | 4.8 | 116 | 327 | 9  | <a href="#">PDB</a> | MOLECULE: PROTEIN (DNA POLYMERASE BETA (E. C. 2. 7. 7. 7)); |
| 183: | <a href="#">9icx-A</a> | 6.8 | 4.8 | 116 | 327 | 9  | <a href="#">PDB</a> | MOLECULE: PROTEIN (DNA POLYMERASE BETA (E. C. 2. 7. 7. 7)); |
| 184: | <a href="#">lzqo-A</a> | 6.8 | 4.7 | 114 | 327 | 10 | <a href="#">PDB</a> | MOLECULE: PROTEIN (DNA POLYMERASE BETA (E. C. 2. 7. 7. 7)); |
| 185: | <a href="#">8icg-A</a> | 6.8 | 4.7 | 114 | 327 | 10 | <a href="#">PDB</a> | MOLECULE: PROTEIN (DNA POLYMERASE BETA (E. C. 2. 7. 7. 7)); |
| 186: | <a href="#">lzqe-A</a> | 6.8 | 4.7 | 114 | 327 | 10 | <a href="#">PDB</a> | MOLECULE: PROTEIN (DNA POLYMERASE BETA (E. C. 2. 7. 7. 7)); |
| 187: | <a href="#">lzqg-A</a> | 6.8 | 4.8 | 115 | 327 | 10 | <a href="#">PDB</a> | MOLECULE: PROTEIN (DNA POLYMERASE BETA (E. C. 2. 7. 7. 7)); |
| 188: | <a href="#">lzqr-A</a> | 6.8 | 4.7 | 114 | 327 | 10 | <a href="#">PDB</a> | MOLECULE: PROTEIN (DNA POLYMERASE BETA (E. C. 2. 7. 7. 7)); |
| 189: | <a href="#">lzqq-A</a> | 6.8 | 4.7 | 115 | 327 | 9  | <a href="#">PDB</a> | MOLECULE: PROTEIN (DNA POLYMERASE BETA (E. C. 2. 7. 7. 7)); |
| 190: | <a href="#">7icp-A</a> | 6.8 | 4.8 | 116 | 327 | 9  | <a href="#">PDB</a> | MOLECULE: PROTEIN (DNA POLYMERASE BETA (E. C. 2. 7. 7. 7)); |
| 191: | <a href="#">lzqi-A</a> | 6.8 | 4.7 | 114 | 327 | 10 | <a href="#">PDB</a> | MOLECULE: PROTEIN (DNA POLYMERASE BETA (E. C. 2. 7. 7. 7)); |
| 192: | <a href="#">lzqf-A</a> | 6.8 | 4.7 | 115 | 327 | 9  | <a href="#">PDB</a> | MOLECULE: PROTEIN (DNA POLYMERASE BETA (E. C. 2. 7. 7. 7)); |
| 193: | <a href="#">lzqp-A</a> | 6.8 | 5.0 | 115 | 327 | 9  | <a href="#">PDB</a> | MOLECULE: PROTEIN (DNA POLYMERASE BETA (E. C. 2. 7. 7. 7)); |
| 194: | <a href="#">9ice-A</a> | 6.8 | 4.7 | 115 | 327 | 9  | <a href="#">PDB</a> | MOLECULE: PROTEIN (DNA POLYMERASE BETA (E. C. 2. 7. 7. 7)); |
| 195: | <a href="#">9ica-A</a> | 6.8 | 4.8 | 116 | 327 | 9  | <a href="#">PDB</a> | MOLECULE: PROTEIN (DNA POLYMERASE BETA (E. C. 2. 7. 7. 7)); |
| 196: | <a href="#">3c2m-A</a> | 6.8 | 6.0 | 124 | 326 | 8  | <a href="#">PDB</a> | MOLECULE: DNA POLYMERASE BETA;                              |
| 197: | <a href="#">1huz-A</a> | 6.8 | 5.3 | 122 | 325 | 10 | <a href="#">PDB</a> | MOLECULE: DNA POLYMERASE BETA;                              |
| 198: | <a href="#">4pgx-A</a> | 6.8 | 5.1 | 117 | 326 | 10 | <a href="#">PDB</a> | MOLECULE: DNA (5'-D(*CP*CP*GP*AP*CP*GP*TP*CP*GP*CP*AP*TP*CP |
| 199: | <a href="#">4ubb-A</a> | 6.8 | 5.1 | 117 | 326 | 10 | <a href="#">PDB</a> | MOLECULE: 5'-D(*CP*CP*GP*AP*CP*CP*GP*CP*GP*CP*AP*TP*CP*AP*G |
| 200: | <a href="#">4ymo-A</a> | 6.8 | 5.1 | 117 | 326 | 10 | <a href="#">PDB</a> | MOLECULE: DNA POLYMERASE BETA;                              |
| 201: | <a href="#">7ice-A</a> | 6.8 | 4.7 | 116 | 327 | 9  | <a href="#">PDB</a> | MOLECULE: PROTEIN (DNA POLYMERASE BETA);                    |
| 202: | <a href="#">4r64-A</a> | 6.8 | 4.9 | 116 | 326 | 10 | <a href="#">PDB</a> | MOLECULE: DNA POLYMERASE BETA;                              |
| 203: | <a href="#">4ymm-A</a> | 6.8 | 4.9 | 116 | 327 | 10 | <a href="#">PDB</a> | MOLECULE: DNA POLYMERASE BETA;                              |
| 204: | <a href="#">1bpe-A</a> | 6.8 | 5.1 | 119 | 284 | 8  | <a href="#">PDB</a> | MOLECULE: DNA POLYMERASE BETA;                              |
| 205: | <a href="#">4ubc-A</a> | 6.8 | 5.1 | 117 | 326 | 10 | <a href="#">PDB</a> | MOLECULE: 5'-D(*CP*CP*GP*AP*CP*CP*GP*CP*GP*CP*AP*TP*CP*AP*G |
| 206: | <a href="#">5j2b-A</a> | 6.8 | 5.1 | 117 | 326 | 10 | <a href="#">PDB</a> | MOLECULE: DNA POLYMERASE BETA;                              |
| 207: | <a href="#">4mf2-A</a> | 6.8 | 4.9 | 120 | 321 | 9  | <a href="#">PDB</a> | MOLECULE: DNA POLYMERASE BETA;                              |
| 208: | <a href="#">5cr0-A</a> | 6.8 | 4.5 | 125 | 246 | 7  | <a href="#">PDB</a> | MOLECULE: DNA POLYMERASE LAMBDA;                            |
| 209: | <a href="#">5cp2-B</a> | 6.8 | 5.5 | 129 | 246 | 8  | <a href="#">PDB</a> | MOLECULE: DNA POLYMERASE LAMBDA;                            |
| 210: | <a href="#">5j2i-A</a> | 6.7 | 4.7 | 123 | 326 | 9  | <a href="#">PDB</a> | MOLECULE: DNA POLYMERASE BETA;                              |
| 211: | <a href="#">4ub3-A</a> | 6.7 | 5.1 | 117 | 323 | 10 | <a href="#">PDB</a> | MOLECULE: 5'-D(*CP*CP*GP*AP*CP*CP*GP*CP*GP*CP*AP*TP*CP*AP*G |
| 212: | <a href="#">4rq5-A</a> | 6.7 | 5.0 | 116 | 326 | 10 | <a href="#">PDB</a> | MOLECULE: DNA POLYMERASE BETA;                              |
| 213: | <a href="#">4rpy-A</a> | 6.7 | 5.1 | 117 | 326 | 10 | <a href="#">PDB</a> | MOLECULE: DNA POLYMERASE BETA;                              |
| 214: | <a href="#">4rq0-A</a> | 6.7 | 5.1 | 117 | 327 | 10 | <a href="#">PDB</a> | MOLECULE: DNA POLYMERASE BETA;                              |
| 215: | <a href="#">3k75-D</a> | 6.7 | 4.7 | 119 | 248 | 9  | <a href="#">PDB</a> | MOLECULE: DNA REPAIR PROTEIN XRCC1;                         |
| 216: | <a href="#">3jpt-A</a> | 6.7 | 5.0 | 120 | 326 | 10 | <a href="#">PDB</a> | MOLECULE: DNA POLYMERASE BETA;                              |
| 217: | <a href="#">3isd-A</a> | 6.7 | 5.0 | 120 | 326 | 10 | <a href="#">PDB</a> | MOLECULE: DNA POLYMERASE BETA;                              |
| 218: | <a href="#">4doa-A</a> | 6.7 | 5.0 | 120 | 326 | 10 | <a href="#">PDB</a> | MOLECULE: DNA POLYMERASE BETA;                              |
| 219: | <a href="#">3rh6-A</a> | 6.7 | 5.0 | 120 | 326 | 10 | <a href="#">PDB</a> | MOLECULE: DNA POLYMERASE BETA;                              |
| 220: | <a href="#">3jps-A</a> | 6.7 | 5.0 | 120 | 326 | 10 | <a href="#">PDB</a> | MOLECULE: DNA POLYMERASE BETA;                              |
| 221: | <a href="#">3uxn-B</a> | 6.7 | 5.1 | 120 | 325 | 10 | <a href="#">PDB</a> | MOLECULE: DNA POLYMERASE BETA;                              |
| 222: | <a href="#">9icn-A</a> | 6.7 | 4.8 | 116 | 327 | 9  | <a href="#">PDB</a> | MOLECULE: PROTEIN (DNA POLYMERASE BETA (E. C. 2. 7. 7. 7)); |
| 223: | <a href="#">2fms-A</a> | 6.7 | 5.2 | 123 | 326 | 10 | <a href="#">PDB</a> | MOLECULE: DNA POLYMERASE BETA;                              |
| 224: | <a href="#">1huo-B</a> | 6.7 | 5.2 | 121 | 325 | 10 | <a href="#">PDB</a> | MOLECULE: DNA POLYMERASE BETA;                              |
| 225: | <a href="#">2pxi-A</a> | 6.7 | 5.2 | 121 | 326 | 10 | <a href="#">PDB</a> | MOLECULE: DNA POLYMERASE BETA;                              |
| 226: | <a href="#">9icm-A</a> | 6.7 | 4.8 | 116 | 327 | 9  | <a href="#">PDB</a> | MOLECULE: PROTEIN (DNA POLYMERASE BETA (E. C. 2. 7. 7. 7)); |
| 227: | <a href="#">8ico-A</a> | 6.7 | 4.8 | 116 | 327 | 9  | <a href="#">PDB</a> | MOLECULE: PROTEIN (DNA POLYMERASE BETA (E. C. 2. 7. 7. 7)); |
| 228: | <a href="#">8ict-A</a> | 6.7 | 5.0 | 116 | 327 | 9  | <a href="#">PDB</a> | MOLECULE: PROTEIN (DNA POLYMERASE BETA (E. C. 2. 7. 7. 7)); |



|      |                        |     |     |     |     |    |                     |                                                               |
|------|------------------------|-----|-----|-----|-----|----|---------------------|---------------------------------------------------------------|
| 229: | <a href="#">9icl-A</a> | 6.7 | 4.7 | 114 | 327 | 10 | <a href="#">PDB</a> | MOLECULE: PROTEIN (DNA POLYMERASE BETA (E. C. 2. 7. 7. 7));   |
| 230: | <a href="#">8icc-A</a> | 6.7 | 4.7 | 114 | 327 | 10 | <a href="#">PDB</a> | MOLECULE: PROTEIN (DNA POLYMERASE BETA (E. C. 2. 7. 7. 7));   |
| 231: | <a href="#">9icw-A</a> | 6.7 | 4.7 | 115 | 327 | 9  | <a href="#">PDB</a> | MOLECULE: PROTEIN (DNA POLYMERASE BETA (E. C. 2. 7. 7. 7));   |
| 232: | <a href="#">7ici-A</a> | 6.7 | 4.8 | 116 | 327 | 9  | <a href="#">PDB</a> | MOLECULE: PROTEIN (DNA POLYMERASE BETA (E. C. 2. 7. 7. 7));   |
| 233: | <a href="#">7icr-A</a> | 6.7 | 4.8 | 116 | 327 | 9  | <a href="#">PDB</a> | MOLECULE: PROTEIN (DNA POLYMERASE BETA (E. C. 2. 7. 7. 7));   |
| 234: | <a href="#">8icb-A</a> | 6.7 | 4.8 | 115 | 327 | 10 | <a href="#">PDB</a> | MOLECULE: PROTEIN (DNA POLYMERASE BETA (E. C. 2. 7. 7. 7));   |
| 235: | <a href="#">8icv-A</a> | 6.7 | 4.7 | 114 | 327 | 10 | <a href="#">PDB</a> | MOLECULE: PROTEIN (DNA POLYMERASE BETA (E. C. 2. 7. 7. 7));   |
| 236: | <a href="#">9icu-A</a> | 6.7 | 4.8 | 117 | 327 | 9  | <a href="#">PDB</a> | MOLECULE: PROTEIN (DNA POLYMERASE BETA (E. C. 2. 7. 7. 7));   |
| 237: | <a href="#">lzqk-A</a> | 6.7 | 5.1 | 116 | 327 | 9  | <a href="#">PDB</a> | MOLECULE: PROTEIN (DNA POLYMERASE BETA (E. C. 2. 7. 7. 7));   |
| 238: | <a href="#">7ics-A</a> | 6.7 | 4.8 | 116 | 327 | 9  | <a href="#">PDB</a> | MOLECULE: PROTEIN (DNA POLYMERASE BETA (E. C. 2. 7. 7. 7));   |
| 239: | <a href="#">9icg-A</a> | 6.7 | 4.8 | 116 | 327 | 9  | <a href="#">PDB</a> | MOLECULE: PROTEIN (DNA POLYMERASE BETA (E. C. 2. 7. 7. 7));   |
| 240: | <a href="#">3c2k-A</a> | 6.7 | 5.0 | 118 | 326 | 8  | <a href="#">PDB</a> | MOLECULE: DNA POLYMERASE BETA;                                |
| 241: | <a href="#">4r65-A</a> | 6.7 | 5.2 | 120 | 326 | 10 | <a href="#">PDB</a> | MOLECULE: DNA POLYMERASE BETA;                                |
| 242: | <a href="#">2bpg-A</a> | 6.7 | 5.1 | 123 | 324 | 10 | <a href="#">PDB</a> | MOLECULE: DNA POLYMERASE BETA;                                |
| 243: | <a href="#">4rpx-A</a> | 6.7 | 5.1 | 116 | 326 | 10 | <a href="#">PDB</a> | MOLECULE: DNA POLYMERASE BETA;                                |
| 244: | <a href="#">8icq-A</a> | 6.7 | 4.7 | 115 | 327 | 9  | <a href="#">PDB</a> | MOLECULE: PROTEIN (DNA POLYMERASE BETA (E. C. 2. 7. 7. 7));   |
| 245: | <a href="#">lzqv-A</a> | 6.7 | 4.8 | 115 | 242 | 10 | <a href="#">PDB</a> | MOLECULE: DNA POLYMERASE BETA;                                |
| 246: | <a href="#">8icr-A</a> | 6.7 | 4.7 | 114 | 327 | 10 | <a href="#">PDB</a> | MOLECULE: PROTEIN (DNA POLYMERASE BETA (E. C. 2. 7. 7. 7));   |
| 247: | <a href="#">8ick-A</a> | 6.7 | 4.8 | 116 | 327 | 9  | <a href="#">PDB</a> | MOLECULE: PROTEIN (DNA POLYMERASE BETA (E. C. 2. 7. 7. 7));   |
| 248: | <a href="#">4nlk-A</a> | 6.7 | 5.3 | 125 | 326 | 10 | <a href="#">PDB</a> | MOLECULE: 5'-D(*CP*CP*GP*AP*CP*(BGM)P*TP*CP*GP*CP*AP*TP*CP*   |
| 249: | <a href="#">3v72-A</a> | 6.7 | 4.9 | 120 | 327 | 9  | <a href="#">PDB</a> | MOLECULE: DNA POLYMERASE BETA;                                |
| 250: | <a href="#">4nml-A</a> | 6.7 | 5.3 | 127 | 326 | 9  | <a href="#">PDB</a> | MOLECULE: 5'-D(*CP*CP*GP*AP*CP*GP*(BGM)P*CP*GP*CP*AP*TP*CP*   |
| 251: | <a href="#">4nxz-A</a> | 6.7 | 5.4 | 126 | 326 | 10 | <a href="#">PDB</a> | MOLECULE: 5'-D(*CP*CP*GP*AP*CP*(60G)P*TP*CP*GP*CP*AP*TP*CP*   |
| 252: | <a href="#">4uay-A</a> | 6.7 | 5.1 | 117 | 326 | 10 | <a href="#">PDB</a> | MOLECULE: 5'-D(*CP*CP*GP*AP*CP*AP*GP*CP*GP*CP*AP*TP*CP*AP*G   |
| 253: | <a href="#">4ph5-A</a> | 6.7 | 5.1 | 118 | 326 | 10 | <a href="#">PDB</a> | MOLECULE: DNA (5'-D(*CP*CP*GP*AP*CP*GP*AP*CP*GP*CP*AP*TP*CP   |
| 254: | <a href="#">4k4h-I</a> | 6.7 | 4.6 | 123 | 332 | 8  | <a href="#">PDB</a> | MOLECULE: DNA POLYMERASE LAMBDA;                              |
| 255: | <a href="#">3rh5-A</a> | 6.7 | 5.3 | 125 | 326 | 10 | <a href="#">PDB</a> | MOLECULE: DNA POLYMERASE BETA;                                |
| 256: | <a href="#">4ycx-A</a> | 6.7 | 5.5 | 126 | 331 | 9  | <a href="#">PDB</a> | MOLECULE: DNA-DIRECTED DNA/RNA POLYMERASE MU;                 |
| 257: | <a href="#">5ca7-B</a> | 6.7 | 5.5 | 129 | 247 | 8  | <a href="#">PDB</a> | MOLECULE: DNA POLYMERASE LAMBDA;                              |
| 258: | <a href="#">4xq8-B</a> | 6.7 | 5.5 | 129 | 247 | 8  | <a href="#">PDB</a> | MOLECULE: DNA POLYMERASE LAMBDA;                              |
| 259: | <a href="#">5chg-A</a> | 6.7 | 4.5 | 125 | 246 | 7  | <a href="#">PDB</a> | MOLECULE: DNA POLYMERASE LAMBDA;                              |
| 260: | <a href="#">4z6f-A</a> | 6.6 | 4.6 | 123 | 326 | 10 | <a href="#">PDB</a> | MOLECULE: DNA POLYMERASE BETA;                                |
| 261: | <a href="#">lzjn-A</a> | 6.6 | 5.0 | 118 | 325 | 10 | <a href="#">PDB</a> | MOLECULE: D(*CP*CP*GP*AP*CP*CP*AP*CP*GP*CP*AP*TP*CP*AP*GP*CP* |
| 262: | <a href="#">4rpz-A</a> | 6.6 | 5.1 | 116 | 326 | 10 | <a href="#">PDB</a> | MOLECULE: DNA POLYMERASE BETA;                                |
| 263: | <a href="#">3lk9-A</a> | 6.6 | 5.0 | 119 | 326 | 10 | <a href="#">PDB</a> | MOLECULE: DNA POLYMERASE BETA;                                |
| 264: | <a href="#">9icr-A</a> | 6.6 | 4.8 | 116 | 327 | 9  | <a href="#">PDB</a> | MOLECULE: PROTEIN (DNA POLYMERASE BETA (E. C. 2. 7. 7. 7));   |
| 265: | <a href="#">9icq-A</a> | 6.6 | 4.8 | 116 | 327 | 9  | <a href="#">PDB</a> | MOLECULE: PROTEIN (DNA POLYMERASE BETA (E. C. 2. 7. 7. 7));   |
| 266: | <a href="#">lhuz-B</a> | 6.6 | 5.3 | 123 | 325 | 10 | <a href="#">PDB</a> | MOLECULE: DNA POLYMERASE BETA;                                |
| 267: | <a href="#">8ice-A</a> | 6.6 | 4.7 | 115 | 327 | 9  | <a href="#">PDB</a> | MOLECULE: PROTEIN (DNA POLYMERASE BETA (E. C. 2. 7. 7. 7));   |
| 268: | <a href="#">9ici-A</a> | 6.6 | 4.7 | 114 | 327 | 10 | <a href="#">PDB</a> | MOLECULE: PROTEIN (DNA POLYMERASE BETA (E. C. 2. 7. 7. 7));   |
| 269: | <a href="#">8icy-A</a> | 6.6 | 4.8 | 116 | 327 | 9  | <a href="#">PDB</a> | MOLECULE: PROTEIN (DNA POLYMERASE BETA (E. C. 2. 7. 7. 7));   |
| 270: | <a href="#">9icj-A</a> | 6.6 | 4.8 | 116 | 327 | 9  | <a href="#">PDB</a> | MOLECULE: PROTEIN (DNA POLYMERASE BETA (E. C. 2. 7. 7. 7));   |
| 271: | <a href="#">8icm-A</a> | 6.6 | 4.7 | 114 | 327 | 10 | <a href="#">PDB</a> | MOLECULE: PROTEIN (DNA POLYMERASE BETA (E. C. 2. 7. 7. 7));   |
| 272: | <a href="#">7ict-A</a> | 6.6 | 4.7 | 114 | 327 | 10 | <a href="#">PDB</a> | MOLECULE: PROTEIN (DNA POLYMERASE BETA (E. C. 2. 7. 7. 7));   |
| 273: | <a href="#">7icu-A</a> | 6.6 | 4.7 | 116 | 327 | 9  | <a href="#">PDB</a> | MOLECULE: PROTEIN (DNA POLYMERASE BETA (E. C. 2. 7. 7. 7));   |
| 274: | <a href="#">8ich-A</a> | 6.6 | 4.8 | 116 | 327 | 9  | <a href="#">PDB</a> | MOLECULE: PROTEIN (DNA POLYMERASE BETA (E. C. 2. 7. 7. 7));   |
| 275: | <a href="#">8ici-A</a> | 6.6 | 4.7 | 114 | 327 | 10 | <a href="#">PDB</a> | MOLECULE: PROTEIN (DNA POLYMERASE BETA (E. C. 2. 7. 7. 7));   |
| 276: | <a href="#">8icp-A</a> | 6.6 | 4.8 | 116 | 327 | 9  | <a href="#">PDB</a> | MOLECULE: PROTEIN (DNA POLYMERASE BETA (E. C. 2. 7. 7. 7));   |
| 277: | <a href="#">7icm-A</a> | 6.6 | 4.8 | 116 | 327 | 9  | <a href="#">PDB</a> | MOLECULE: PROTEIN (DNA POLYMERASE BETA (E. C. 2. 7. 7. 7));   |
| 278: | <a href="#">lzqt-A</a> | 6.6 | 4.7 | 114 | 327 | 10 | <a href="#">PDB</a> | MOLECULE: PROTEIN (DNA POLYMERASE BETA (E. C. 2. 7. 7. 7));   |
| 279: | <a href="#">8icx-A</a> | 6.6 | 4.7 | 115 | 327 | 9  | <a href="#">PDB</a> | MOLECULE: PROTEIN (DNA POLYMERASE BETA (E. C. 2. 7. 7. 7));   |
| 280: | <a href="#">8ica-A</a> | 6.6 | 4.7 | 115 | 327 | 9  | <a href="#">PDB</a> | MOLECULE: PROTEIN (DNA POLYMERASE BETA (E. C. 2. 7. 7. 7));   |
| 281: | <a href="#">8icn-A</a> | 6.6 | 4.7 | 114 | 327 | 10 | <a href="#">PDB</a> | MOLECULE: PROTEIN (DNA POLYMERASE BETA (E. C. 2. 7. 7. 7));   |
| 282: | <a href="#">8icz-A</a> | 6.6 | 4.7 | 114 | 327 | 10 | <a href="#">PDB</a> | MOLECULE: PROTEIN (DNA POLYMERASE BETA (E. C. 2. 7. 7. 7));   |
| 283: | <a href="#">9icb-A</a> | 6.6 | 4.7 | 114 | 327 | 10 | <a href="#">PDB</a> | MOLECULE: PROTEIN (DNA POLYMERASE BETA (E. C. 2. 7. 7. 7));   |
| 284: | <a href="#">9ich-A</a> | 6.6 | 5.1 | 116 | 327 | 9  | <a href="#">PDB</a> | MOLECULE: PROTEIN (DNA POLYMERASE BETA (E. C. 2. 7. 7. 7));   |
| 285: | <a href="#">9icf-A</a> | 6.6 | 4.8 | 116 | 327 | 9  | <a href="#">PDB</a> | MOLECULE: PROTEIN (DNA POLYMERASE BETA (E. C. 2. 7. 7. 7));   |
| 286: | <a href="#">4php-A</a> | 6.6 | 5.1 | 117 | 326 | 10 | <a href="#">PDB</a> | MOLECULE: DNA (5'-D(*CP*CP*GP*AP*CP*TP*GP*CP*GP*CP*AP*TP*CP   |
| 287: | <a href="#">lzqu-A</a> | 6.6 | 4.7 | 115 | 242 | 10 | <a href="#">PDB</a> | MOLECULE: DNA POLYMERASE BETA;                                |
| 288: | <a href="#">lxsl-I</a> | 6.6 | 5.0 | 127 | 326 | 8  | <a href="#">PDB</a> | MOLECULE: 5'-D(*CP*GP*GP*CP*AP*GP*CP*GP*CP*AP*CP)-3';         |
| 289: | <a href="#">2gws-M</a> | 6.6 | 5.3 | 128 | 326 | 8  | <a href="#">PDB</a> | MOLECULE: 5'-D(*CP*GP*GP*CP*AP*GP*CP*GP*CP*AP*CP)-3';         |
| 290: | <a href="#">8icu-A</a> | 6.6 | 4.8 | 116 | 327 | 9  | <a href="#">PDB</a> | MOLECULE: PROTEIN (DNA POLYMERASE BETA (E. C. 2. 7. 7. 7));   |
| 291: | <a href="#">7ick-A</a> | 6.6 | 4.8 | 116 | 327 | 9  | <a href="#">PDB</a> | MOLECULE: PROTEIN (DNA POLYMERASE BETA (E. C. 2. 7. 7. 7));   |

|                          |      |                        |     |     |     |     |    |                     |                                                               |
|--------------------------|------|------------------------|-----|-----|-----|-----|----|---------------------|---------------------------------------------------------------|
| <input type="checkbox"/> | 292: | <a href="#">8icw-A</a> | 6.6 | 4.7 | 117 | 327 | 9  | <a href="#">PDB</a> | MOLECULE: PROTEIN (DNA POLYMERASE BETA (E. C. 2. 7. 7. 7));   |
| <input type="checkbox"/> | 293: | <a href="#">1xsn-A</a> | 6.6 | 5.1 | 122 | 324 | 9  | <a href="#">PDB</a> | MOLECULE: DNA POLYMERASE LAMBDA;                              |
| <input type="checkbox"/> | 294: | <a href="#">3pnc-A</a> | 6.6 | 5.4 | 125 | 316 | 8  | <a href="#">PDB</a> | MOLECULE: DNA POLYMERASE LAMBDA;                              |
| <input type="checkbox"/> | 295: | <a href="#">4uaw-A</a> | 6.6 | 5.1 | 119 | 326 | 10 | <a href="#">PDB</a> | MOLECULE: 5' -D (*CP*CP*GP*AP*CP*AP*GP*CP*GP*CP*AP*TP*CP*AP*G |
| <input type="checkbox"/> | 296: | <a href="#">4k4g-I</a> | 6.6 | 4.7 | 123 | 327 | 8  | <a href="#">PDB</a> | MOLECULE: DNA POLYMERASE LAMBDA;                              |
| <input type="checkbox"/> | 297: | <a href="#">4rq1-A</a> | 6.6 | 5.0 | 120 | 324 | 11 | <a href="#">PDB</a> | MOLECULE: DNA POLYMERASE BETA;                                |
| <input type="checkbox"/> | 298: | <a href="#">3pmm-A</a> | 6.6 | 5.4 | 125 | 312 | 8  | <a href="#">PDB</a> | MOLECULE: DNA POLYMERASE LAMBDA;                              |
| <input type="checkbox"/> | 299: | <a href="#">4z6e-A</a> | 6.6 | 5.1 | 126 | 326 | 10 | <a href="#">PDB</a> | MOLECULE: DNA (5' -D (*CP*CP*GP*AP*CP*GP*TP*CP*GP*CP*AP*TP*CP |
| <input type="checkbox"/> | 300: | <a href="#">4rq2-A</a> | 6.5 | 4.1 | 119 | 333 | 10 | <a href="#">PDB</a> | MOLECULE: DNA POLYMERASE BETA;                                |
| <input type="checkbox"/> | 301: | <a href="#">5j2a-A</a> | 6.5 | 5.1 | 120 | 326 | 10 | <a href="#">PDB</a> | MOLECULE: DNA POLYMERASE BETA;                                |
| <input type="checkbox"/> | 302: | <a href="#">3mby-A</a> | 6.5 | 5.0 | 120 | 326 | 10 | <a href="#">PDB</a> | MOLECULE: DNA POLYMERASE BETA;                                |
| <input type="checkbox"/> | 303: | <a href="#">3jpr-A</a> | 6.5 | 5.0 | 120 | 326 | 10 | <a href="#">PDB</a> | MOLECULE: DNA POLYMERASE BETA;                                |
| <input type="checkbox"/> | 304: | <a href="#">3rjf-A</a> | 6.5 | 5.3 | 121 | 326 | 10 | <a href="#">PDB</a> | MOLECULE: DNA POLYMERASE BETA;                                |
| <input type="checkbox"/> | 305: | <a href="#">3jpn-A</a> | 6.5 | 5.0 | 120 | 326 | 10 | <a href="#">PDB</a> | MOLECULE: DNA POLYMERASE BETA;                                |
| <input type="checkbox"/> | 306: | <a href="#">4do9-A</a> | 6.5 | 5.0 | 120 | 326 | 10 | <a href="#">PDB</a> | MOLECULE: DNA POLYMERASE BETA;                                |
| <input type="checkbox"/> | 307: | <a href="#">3jpo-A</a> | 6.5 | 5.0 | 120 | 326 | 10 | <a href="#">PDB</a> | MOLECULE: DNA POLYMERASE BETA;                                |
| <input type="checkbox"/> | 308: | <a href="#">4dob-A</a> | 6.5 | 5.1 | 121 | 326 | 10 | <a href="#">PDB</a> | MOLECULE: DNA POLYMERASE BETA;                                |
| <input type="checkbox"/> | 309: | <a href="#">3c5g-B</a> | 6.5 | 5.4 | 128 | 329 | 9  | <a href="#">PDB</a> | MOLECULE: DNA POLYMERASE LAMBDA;                              |
| <input type="checkbox"/> | 310: | <a href="#">3mda-A</a> | 6.5 | 5.1 | 122 | 325 | 8  | <a href="#">PDB</a> | MOLECULE: DNA POLYMERASE LAMBDA;                              |
| <input type="checkbox"/> | 311: | <a href="#">3uq0-A</a> | 6.5 | 5.1 | 120 | 310 | 8  | <a href="#">PDB</a> | MOLECULE: DNA POLYMERASE LAMBDA;                              |
| <input type="checkbox"/> | 312: | <a href="#">3mgh-C</a> | 6.5 | 5.3 | 124 | 321 | 8  | <a href="#">PDB</a> | MOLECULE: DNA POLYMERASE LAMBDA;                              |
| <input type="checkbox"/> | 313: | <a href="#">2isp-A</a> | 6.5 | 5.0 | 120 | 326 | 10 | <a href="#">PDB</a> | MOLECULE: POLYMERASE (DNA DIRECTED), BETA;                    |
| <input type="checkbox"/> | 314: | <a href="#">7icg-A</a> | 6.5 | 4.8 | 118 | 327 | 8  | <a href="#">PDB</a> | MOLECULE: PROTEIN (DNA POLYMERASE BETA (E. C. 2. 7. 7. 7));   |
| <input type="checkbox"/> | 315: | <a href="#">8icl-A</a> | 6.5 | 4.8 | 117 | 327 | 9  | <a href="#">PDB</a> | MOLECULE: PROTEIN (DNA POLYMERASE BETA (E. C. 2. 7. 7. 7));   |
| <input type="checkbox"/> | 316: | <a href="#">1zqb-A</a> | 6.5 | 4.7 | 114 | 327 | 10 | <a href="#">PDB</a> | MOLECULE: PROTEIN (DNA POLYMERASE BETA (E. C. 2. 7. 7. 7));   |
| <input type="checkbox"/> | 317: | <a href="#">7icn-A</a> | 6.5 | 4.7 | 115 | 327 | 9  | <a href="#">PDB</a> | MOLECULE: PROTEIN (DNA POLYMERASE BETA (E. C. 2. 7. 7. 7));   |
| <input type="checkbox"/> | 318: | <a href="#">1zqd-A</a> | 6.5 | 4.7 | 115 | 327 | 9  | <a href="#">PDB</a> | MOLECULE: PROTEIN (DNA POLYMERASE BETA (E. C. 2. 7. 7. 7));   |
| <input type="checkbox"/> | 319: | <a href="#">7icf-A</a> | 6.5 | 4.8 | 116 | 327 | 9  | <a href="#">PDB</a> | MOLECULE: PROTEIN (DNA POLYMERASE BETA (E. C. 2. 7. 7. 7));   |
| <input type="checkbox"/> | 320: | <a href="#">9icc-A</a> | 6.5 | 4.7 | 115 | 327 | 9  | <a href="#">PDB</a> | MOLECULE: PROTEIN (DNA POLYMERASE BETA (E. C. 2. 7. 7. 7));   |
| <input type="checkbox"/> | 321: | <a href="#">8icj-A</a> | 6.5 | 4.7 | 114 | 327 | 10 | <a href="#">PDB</a> | MOLECULE: PROTEIN (DNA POLYMERASE BETA (E. C. 2. 7. 7. 7));   |
| <input type="checkbox"/> | 322: | <a href="#">3jpp-A</a> | 6.5 | 5.0 | 120 | 326 | 10 | <a href="#">PDB</a> | MOLECULE: DNA POLYMERASE BETA;                                |
| <input type="checkbox"/> | 323: | <a href="#">4kld-A</a> | 6.5 | 5.0 | 120 | 326 | 10 | <a href="#">PDB</a> | MOLECULE: 5' -D (*CP*CP*GP*AP*CP*GP*GP*CP*GP*CP*AP*TP*CP*AP*G |
| <input type="checkbox"/> | 324: | <a href="#">4rq6-A</a> | 6.5 | 5.1 | 117 | 326 | 10 | <a href="#">PDB</a> | MOLECULE: DNA POLYMERASE BETA;                                |
| <input type="checkbox"/> | 325: | <a href="#">1xsl-M</a> | 6.5 | 5.3 | 128 | 327 | 9  | <a href="#">PDB</a> | MOLECULE: 5' -D (*CP*GP*GP*CP*AP*GP*CP*GP*CP*AP*C) -3' ;      |
| <input type="checkbox"/> | 326: | <a href="#">2ber-A</a> | 6.5 | 5.1 | 122 | 325 | 9  | <a href="#">PDB</a> | MOLECULE: DNA POLYMERASE LAMBDA;                              |
| <input type="checkbox"/> | 327: | <a href="#">2pfn-A</a> | 6.5 | 5.1 | 120 | 325 | 9  | <a href="#">PDB</a> | MOLECULE: DNA POLYMERASE LAMBDA;                              |
| <input type="checkbox"/> | 328: | <a href="#">1rzt-A</a> | 6.5 | 4.3 | 124 | 327 | 8  | <a href="#">PDB</a> | MOLECULE: DNA POLYMERASE LAMBDA;                              |
| <input type="checkbox"/> | 329: | <a href="#">7ico-A</a> | 6.5 | 5.1 | 118 | 327 | 8  | <a href="#">PDB</a> | MOLECULE: PROTEIN (DNA POLYMERASE BETA (E. C. 2. 7. 7. 7));   |
| <input type="checkbox"/> | 330: | <a href="#">3hw8-A</a> | 6.5 | 5.2 | 124 | 327 | 9  | <a href="#">PDB</a> | MOLECULE: DNA POLYMERASE LAMBDA;                              |
| <input type="checkbox"/> | 331: | <a href="#">4uaz-A</a> | 6.5 | 5.1 | 117 | 325 | 10 | <a href="#">PDB</a> | MOLECULE: 5' -D (*CP*CP*GP*AP*CP*AP*GP*CP*GP*CP*AP*TP*CP*AP*G |
| <input type="checkbox"/> | 332: | <a href="#">4rq3-A</a> | 6.5 | 5.1 | 116 | 326 | 10 | <a href="#">PDB</a> | MOLECULE: DNA POLYMERASE BETA;                                |
| <input type="checkbox"/> | 333: | <a href="#">5cr0-B</a> | 6.5 | 5.2 | 128 | 243 | 8  | <a href="#">PDB</a> | MOLECULE: DNA POLYMERASE LAMBDA;                              |
| <input type="checkbox"/> | 334: | <a href="#">5iim-A</a> | 6.5 | 5.2 | 125 | 326 | 9  | <a href="#">PDB</a> | MOLECULE: DNA POLYMERASE LAMBDA;                              |
| <input type="checkbox"/> | 335: | <a href="#">5iin-A</a> | 6.5 | 5.2 | 125 | 326 | 9  | <a href="#">PDB</a> | MOLECULE: DNA POLYMERASE LAMBDA;                              |
| <input type="checkbox"/> | 336: | <a href="#">4rq8-A</a> | 6.4 | 4.5 | 125 | 333 | 10 | <a href="#">PDB</a> | MOLECULE: DNA POLYMERASE BETA;                                |
| <input type="checkbox"/> | 337: | <a href="#">4fhx-A</a> | 6.4 | 8.9 | 132 | 323 | 7  | <a href="#">PDB</a> | MOLECULE: POLY(A) RNA POLYMERASE PROTEIN CID1;                |
| <input type="checkbox"/> | 338: | <a href="#">4rq4-A</a> | 6.4 | 5.1 | 117 | 326 | 10 | <a href="#">PDB</a> | MOLECULE: DNA POLYMERASE BETA;                                |
| <input type="checkbox"/> | 339: | <a href="#">3pml-A</a> | 6.4 | 5.2 | 124 | 322 | 8  | <a href="#">PDB</a> | MOLECULE: DNA POLYMERASE LAMBDA;                              |
| <input type="checkbox"/> | 340: | <a href="#">3mgi-A</a> | 6.4 | 5.1 | 121 | 318 | 8  | <a href="#">PDB</a> | MOLECULE: DNA POLYMERASE LAMBDA;                              |
| <input type="checkbox"/> | 341: | <a href="#">3uq2-A</a> | 6.4 | 5.1 | 119 | 318 | 8  | <a href="#">PDB</a> | MOLECULE: DNA POLYMERASE LAMBDA;                              |
| <input type="checkbox"/> | 342: | <a href="#">2iso-A</a> | 6.4 | 5.2 | 123 | 326 | 10 | <a href="#">PDB</a> | MOLECULE: POLYMERASE (DNA DIRECTED), BETA;                    |
| <input type="checkbox"/> | 343: | <a href="#">1mq3-A</a> | 6.4 | 5.2 | 121 | 326 | 10 | <a href="#">PDB</a> | MOLECULE: DNA POLYMERASE BETA;                                |
| <input type="checkbox"/> | 344: | <a href="#">1zqs-A</a> | 6.4 | 4.7 | 114 | 327 | 10 | <a href="#">PDB</a> | MOLECULE: PROTEIN (DNA POLYMERASE BETA (E. C. 2. 7. 7. 7));   |
| <input type="checkbox"/> | 345: | <a href="#">1zqh-A</a> | 6.4 | 4.7 | 114 | 327 | 10 | <a href="#">PDB</a> | MOLECULE: PROTEIN (DNA POLYMERASE BETA (E. C. 2. 7. 7. 7));   |
| <input type="checkbox"/> | 346: | <a href="#">1zqj-A</a> | 6.4 | 5.1 | 116 | 327 | 9  | <a href="#">PDB</a> | MOLECULE: PROTEIN (DNA POLYMERASE BETA (E. C. 2. 7. 7. 7));   |
| <input type="checkbox"/> | 347: | <a href="#">3hwt-A</a> | 6.4 | 5.4 | 123 | 319 | 8  | <a href="#">PDB</a> | MOLECULE: DNA POLYMERASE LAMBDA;                              |
| <input type="checkbox"/> | 348: | <a href="#">2pfp-A</a> | 6.4 | 5.2 | 124 | 326 | 9  | <a href="#">PDB</a> | MOLECULE: DNA POLYMERASE LAMBDA;                              |
| <input type="checkbox"/> | 349: | <a href="#">2pfg-A</a> | 6.4 | 5.1 | 121 | 324 | 9  | <a href="#">PDB</a> | MOLECULE: DNA POLYMERASE LAMBDA;                              |
| <input type="checkbox"/> | 350: | <a href="#">5ddy-G</a> | 6.4 | 4.4 | 123 | 244 | 8  | <a href="#">PDB</a> | MOLECULE: DNA POLYMERASE LAMBDA;                              |
| <input type="checkbox"/> | 351: | <a href="#">2bcv-A</a> | 6.4 | 5.2 | 124 | 323 | 9  | <a href="#">PDB</a> | MOLECULE: DNA POLYMERASE LAMBDA;                              |
| <input type="checkbox"/> | 352: | <a href="#">2bcq-A</a> | 6.4 | 5.2 | 124 | 324 | 9  | <a href="#">PDB</a> | MOLECULE: DNA POLYMERASE LAMBDA;                              |
| <input type="checkbox"/> | 353: | <a href="#">3hx0-F</a> | 6.4 | 5.5 | 126 | 329 | 8  | <a href="#">PDB</a> | MOLECULE: DNA POLYMERASE LAMBDA;                              |
| <input type="checkbox"/> | 354: | <a href="#">3hx0-A</a> | 6.4 | 5.2 | 125 | 330 | 8  | <a href="#">PDB</a> | MOLECULE: DNA POLYMERASE LAMBDA;                              |

|                          |      |                        |     |     |     |     |    |                     |                                                        |
|--------------------------|------|------------------------|-----|-----|-----|-----|----|---------------------|--------------------------------------------------------|
| <input type="checkbox"/> | 355: | <a href="#">5cb1-A</a> | 6.4 | 4.9 | 128 | 326 | 9  | <a href="#">PDB</a> | MOLECULE: DNA POLYMERASE LAMBDA;                       |
| <input type="checkbox"/> | 356: | <a href="#">4k4i-E</a> | 6.4 | 4.3 | 124 | 329 | 8  | <a href="#">PDB</a> | MOLECULE: DNA POLYMERASE LAMBDA;                       |
| <input type="checkbox"/> | 357: | <a href="#">5dkw-A</a> | 6.4 | 5.6 | 129 | 319 | 9  | <a href="#">PDB</a> | MOLECULE: DNA POLYMERASE LAMBDA;                       |
| <input type="checkbox"/> | 358: | <a href="#">5iil-A</a> | 6.4 | 5.4 | 126 | 326 | 9  | <a href="#">PDB</a> | MOLECULE: DNA POLYMERASE LAMBDA;                       |
| <input type="checkbox"/> | 359: | <a href="#">5iik-A</a> | 6.4 | 5.4 | 126 | 325 | 9  | <a href="#">PDB</a> | MOLECULE: DNA POLYMERASE LAMBDA;                       |
| <input type="checkbox"/> | 360: | <a href="#">4fh3-A</a> | 6.3 | 8.9 | 132 | 323 | 6  | <a href="#">PDB</a> | MOLECULE: POLY(A) RNA POLYMERASE PROTEIN CID1;         |
| <input type="checkbox"/> | 361: | <a href="#">4fh5-A</a> | 6.3 | 9.0 | 131 | 323 | 6  | <a href="#">PDB</a> | MOLECULE: POLY(A) RNA POLYMERASE PROTEIN CID1;         |
| <input type="checkbox"/> | 362: | <a href="#">4fhw-A</a> | 6.3 | 9.0 | 131 | 323 | 6  | <a href="#">PDB</a> | MOLECULE: POLY(A) RNA POLYMERASE PROTEIN CID1;         |
| <input type="checkbox"/> | 363: | <a href="#">4fhv-A</a> | 6.3 | 8.9 | 131 | 323 | 6  | <a href="#">PDB</a> | MOLECULE: POLY(A) RNA POLYMERASE PROTEIN CID1;         |
| <input type="checkbox"/> | 364: | <a href="#">4p4o-A</a> | 6.3 | 4.7 | 119 | 306 | 8  | <a href="#">PDB</a> | MOLECULE: DNA POLYMERASE BETA;                         |
| <input type="checkbox"/> | 365: | <a href="#">1bpx-A</a> | 6.3 | 5.0 | 116 | 331 | 10 | <a href="#">PDB</a> | MOLECULE: PROTEIN (DNA POLYMERASE BETA);               |
| <input type="checkbox"/> | 366: | <a href="#">7icl-A</a> | 6.3 | 5.1 | 116 | 327 | 9  | <a href="#">PDB</a> | MOLECULE: PROTEIN (DNA POLYMERASE BETA (E.C.2.7.7.7)); |
| <input type="checkbox"/> | 367: | <a href="#">1zql-A</a> | 6.3 | 4.7 | 115 | 327 | 9  | <a href="#">PDB</a> | MOLECULE: PROTEIN (DNA POLYMERASE BETA (E.C.2.7.7.7)); |
| <input type="checkbox"/> | 368: | <a href="#">1zqc-A</a> | 6.3 | 4.7 | 114 | 327 | 10 | <a href="#">PDB</a> | MOLECULE: PROTEIN (DNA POLYMERASE BETA (E.C.2.7.7.7)); |
| <input type="checkbox"/> | 369: | <a href="#">1mq2-A</a> | 6.3 | 4.8 | 118 | 326 | 8  | <a href="#">PDB</a> | MOLECULE: DNA POLYMERASE BETA;                         |
| <input type="checkbox"/> | 370: | <a href="#">1zqm-A</a> | 6.3 | 4.7 | 115 | 327 | 9  | <a href="#">PDB</a> | MOLECULE: PROTEIN (DNA POLYMERASE BETA (E.C.2.7.7.7)); |
| <input type="checkbox"/> | 371: | <a href="#">8icf-A</a> | 6.3 | 4.7 | 114 | 327 | 10 | <a href="#">PDB</a> | MOLECULE: PROTEIN (DNA POLYMERASE BETA (E.C.2.7.7.7)); |
| <input type="checkbox"/> | 372: | <a href="#">2bcu-A</a> | 6.3 | 5.2 | 122 | 326 | 9  | <a href="#">PDB</a> | MOLECULE: DNA POLYMERASE LAMBDA;                       |
| <input type="checkbox"/> | 373: | <a href="#">2ihm-A</a> | 6.3 | 3.7 | 118 | 332 | 8  | <a href="#">PDB</a> | MOLECULE: DNA POLYMERASE MU;                           |
| <input type="checkbox"/> | 374: | <a href="#">1xsp-A</a> | 6.3 | 5.2 | 124 | 327 | 9  | <a href="#">PDB</a> | MOLECULE: DNA POLYMERASE LAMBDA;                       |
| <input type="checkbox"/> | 375: | <a href="#">2bcs-A</a> | 6.3 | 5.2 | 124 | 324 | 9  | <a href="#">PDB</a> | MOLECULE: DNA POLYMERASE LAMBDA;                       |
| <input type="checkbox"/> | 376: | <a href="#">4k4h-A</a> | 6.3 | 5.6 | 131 | 327 | 9  | <a href="#">PDB</a> | MOLECULE: DNA POLYMERASE LAMBDA;                       |
| <input type="checkbox"/> | 377: | <a href="#">5ddm-A</a> | 6.3 | 5.2 | 128 | 242 | 9  | <a href="#">PDB</a> | MOLECULE: DNA POLYMERASE LAMBDA;                       |
| <input type="checkbox"/> | 378: | <a href="#">5cb1-B</a> | 6.3 | 4.3 | 125 | 245 | 8  | <a href="#">PDB</a> | MOLECULE: DNA POLYMERASE LAMBDA;                       |
| <input type="checkbox"/> | 379: | <a href="#">4xus-A</a> | 6.3 | 5.2 | 121 | 323 | 9  | <a href="#">PDB</a> | MOLECULE: DNA POLYMERASE LAMBDA;                       |
| <input type="checkbox"/> | 380: | <a href="#">4x5v-A</a> | 6.3 | 5.2 | 125 | 317 | 9  | <a href="#">PDB</a> | MOLECULE: DNA POLYMERASE LAMBDA;                       |
| <input type="checkbox"/> | 381: | <a href="#">5ddy-E</a> | 6.3 | 4.5 | 125 | 244 | 8  | <a href="#">PDB</a> | MOLECULE: DNA POLYMERASE LAMBDA;                       |
| <input type="checkbox"/> | 382: | <a href="#">1xsl-A</a> | 6.2 | 5.5 | 128 | 327 | 8  | <a href="#">PDB</a> | MOLECULE: 5'-D(*CP*GP*GP*CP*AP*GP*CP*GP*CP*AP*C)-3' ;  |
| <input type="checkbox"/> | 383: | <a href="#">3pml-B</a> | 6.2 | 5.5 | 119 | 324 | 8  | <a href="#">PDB</a> | MOLECULE: DNA POLYMERASE LAMBDA;                       |
| <input type="checkbox"/> | 384: | <a href="#">4p4p-A</a> | 6.2 | 4.5 | 116 | 282 | 7  | <a href="#">PDB</a> | MOLECULE: DNA POLYMERASE BETA;                         |
| <input type="checkbox"/> | 385: | <a href="#">4yd2-A</a> | 6.2 | 4.6 | 112 | 323 | 10 | <a href="#">PDB</a> | MOLECULE: DNA-DIRECTED DNA/RNA POLYMERASE MU;          |
| <input type="checkbox"/> | 386: | <a href="#">4k4i-A</a> | 6.2 | 5.6 | 131 | 333 | 9  | <a href="#">PDB</a> | MOLECULE: DNA POLYMERASE LAMBDA;                       |
| <input type="checkbox"/> | 387: | <a href="#">5ddy-A</a> | 6.2 | 6.1 | 132 | 327 | 8  | <a href="#">PDB</a> | MOLECULE: DNA POLYMERASE LAMBDA;                       |
| <input type="checkbox"/> | 388: | <a href="#">4xrh-B</a> | 6.2 | 5.5 | 129 | 247 | 8  | <a href="#">PDB</a> | MOLECULE: DNA POLYMERASE LAMBDA;                       |
| <input type="checkbox"/> | 389: | <a href="#">5ddm-B</a> | 6.2 | 5.3 | 129 | 247 | 8  | <a href="#">PDB</a> | MOLECULE: DNA POLYMERASE LAMBDA;                       |
| <input type="checkbox"/> | 390: | <a href="#">4qzf-A</a> | 6.2 | 4.5 | 119 | 336 | 8  | <a href="#">PDB</a> | MOLECULE: DNA NUCLEOTIDYLEXOTRANSFERASE;               |
| <input type="checkbox"/> | 391: | <a href="#">1kej-A</a> | 6.1 | 4.5 | 125 | 357 | 8  | <a href="#">PDB</a> | MOLECULE: TERMINAL DEOXYNUCLEOTIDYLTRANSFERASE SHORT   |
| <input type="checkbox"/> | 392: | <a href="#">1rzt-M</a> | 6.1 | 4.7 | 127 | 327 | 7  | <a href="#">PDB</a> | MOLECULE: DNA POLYMERASE LAMBDA;                       |
| <input type="checkbox"/> | 393: | <a href="#">4p4m-A</a> | 6.1 | 4.5 | 116 | 270 | 7  | <a href="#">PDB</a> | MOLECULE: DNA POLYMERASE BETA;                         |
| <input type="checkbox"/> | 394: | <a href="#">4m0a-A</a> | 6.1 | 5.5 | 123 | 325 | 9  | <a href="#">PDB</a> | MOLECULE: DNA-DIRECTED DNA/RNA POLYMERASE MU;          |
| <input type="checkbox"/> | 395: | <a href="#">4fhy-A</a> | 6.0 | 9.0 | 129 | 318 | 6  | <a href="#">PDB</a> | MOLECULE: POLY(A) RNA POLYMERASE PROTEIN CID1;         |
| <input type="checkbox"/> | 396: | <a href="#">4k4i-I</a> | 6.0 | 4.7 | 123 | 325 | 8  | <a href="#">PDB</a> | MOLECULE: DNA POLYMERASE LAMBDA;                       |
| <input type="checkbox"/> | 397: | <a href="#">3c5g-A</a> | 6.0 | 5.5 | 126 | 324 | 9  | <a href="#">PDB</a> | MOLECULE: DNA POLYMERASE LAMBDA;                       |
| <input type="checkbox"/> | 398: | <a href="#">2be3-B</a> | 6.0 | 4.5 | 123 | 189 | 6  | <a href="#">PDB</a> | MOLECULE: GTP PYROPHOSPHOKINASE;                       |
| <input type="checkbox"/> | 399: | <a href="#">4qze-A</a> | 6.0 | 4.4 | 114 | 335 | 8  | <a href="#">PDB</a> | MOLECULE: DNA NUCLEOTIDYLEXOTRANSFERASE;               |
| <input type="checkbox"/> | 400: | <a href="#">4e80-A</a> | 5.9 | 8.4 | 126 | 317 | 7  | <a href="#">PDB</a> | MOLECULE: POLY(A) RNA POLYMERASE PROTEIN CID1;         |
| <input type="checkbox"/> | 401: | <a href="#">1jms-A</a> | 5.9 | 4.3 | 117 | 360 | 8  | <a href="#">PDB</a> | MOLECULE: TERMINAL DEOXYNUCLEOTIDYLTRANSFERASE;        |
| <input type="checkbox"/> | 402: | <a href="#">3mgh-A</a> | 5.9 | 5.3 | 124 | 319 | 8  | <a href="#">PDB</a> | MOLECULE: DNA POLYMERASE LAMBDA;                       |
| <input type="checkbox"/> | 403: | <a href="#">4k4g-A</a> | 5.9 | 5.4 | 131 | 322 | 8  | <a href="#">PDB</a> | MOLECULE: DNA POLYMERASE LAMBDA;                       |
| <input type="checkbox"/> | 404: | <a href="#">4qzh-A</a> | 5.9 | 4.4 | 116 | 337 | 8  | <a href="#">PDB</a> | MOLECULE: DNA NUCLEOTIDYLEXOTRANSFERASE;               |
| <input type="checkbox"/> | 405: | <a href="#">5ded-G</a> | 5.9 | 4.5 | 123 | 190 | 8  | <a href="#">PDB</a> | MOLECULE: GTP PYROPHOSPHOKINASE YJBM;                  |
| <input type="checkbox"/> | 406: | <a href="#">5ded-A</a> | 5.9 | 4.2 | 123 | 196 | 8  | <a href="#">PDB</a> | MOLECULE: GTP PYROPHOSPHOKINASE YJBM;                  |
| <input type="checkbox"/> | 407: | <a href="#">4ig8-A</a> | 5.8 | 5.7 | 131 | 338 | 11 | <a href="#">PDB</a> | MOLECULE: 2'-5'-OLIGOADENYLATE SYNTHASE 1;             |
| <input type="checkbox"/> | 408: | <a href="#">3nyb-A</a> | 5.8 | 8.5 | 131 | 323 | 6  | <a href="#">PDB</a> | MOLECULE: POLY(A) RNA POLYMERASE PROTEIN 2;            |
| <input type="checkbox"/> | 409: | <a href="#">5dec-A</a> | 5.8 | 4.9 | 124 | 188 | 8  | <a href="#">PDB</a> | MOLECULE: GTP PYROPHOSPHOKINASE YJBM;                  |
| <input type="checkbox"/> | 410: | <a href="#">4ud5-A</a> | 5.8 | 8.4 | 130 | 338 | 8  | <a href="#">PDB</a> | MOLECULE: POLY(A) RNA POLYMERASE PROTEIN CID1;         |
| <input type="checkbox"/> | 411: | <a href="#">4ud5-B</a> | 5.8 | 8.0 | 127 | 342 | 7  | <a href="#">PDB</a> | MOLECULE: POLY(A) RNA POLYMERASE PROTEIN CID1;         |
| <input type="checkbox"/> | 412: | <a href="#">4k4g-E</a> | 5.8 | 5.2 | 116 | 323 | 9  | <a href="#">PDB</a> | MOLECULE: DNA POLYMERASE LAMBDA;                       |
| <input type="checkbox"/> | 413: | <a href="#">4m04-A</a> | 5.8 | 5.4 | 118 | 327 | 9  | <a href="#">PDB</a> | MOLECULE: DNA-DIRECTED DNA/RNA POLYMERASE MU;          |
| <input type="checkbox"/> | 414: | <a href="#">5ded-C</a> | 5.8 | 5.0 | 127 | 194 | 8  | <a href="#">PDB</a> | MOLECULE: GTP PYROPHOSPHOKINASE YJBM;                  |
| <input type="checkbox"/> | 415: | <a href="#">4fhp-A</a> | 5.7 | 8.9 | 135 | 323 | 6  | <a href="#">PDB</a> | MOLECULE: POLY(A) RNA POLYMERASE PROTEIN CID1;         |
| <input type="checkbox"/> | 416: | <a href="#">5bpc-A</a> | 5.7 | 5.2 | 116 | 313 | 10 | <a href="#">PDB</a> | MOLECULE: DNA POLYMERASE BETA;                         |
| <input type="checkbox"/> | 417: | <a href="#">4m9n-A</a> | 5.7 | 5.7 | 124 | 300 | 10 | <a href="#">PDB</a> | MOLECULE: DNA POLYMERASE BETA;                         |

|      |                        |     |     |     |     |    |                     |                                                             |
|------|------------------------|-----|-----|-----|-----|----|---------------------|-------------------------------------------------------------|
| 418: | <a href="#">5ded-B</a> | 5.7 | 4.2 | 122 | 191 | 8  | <a href="#">PDB</a> | MOLECULE: GTP PYROPHOSPHOKINASE YJBM;                       |
| 419: | <a href="#">4qzi-A</a> | 5.7 | 4.6 | 122 | 336 | 7  | <a href="#">PDB</a> | MOLECULE: DNA NUCLEOTIDYLEXOTRANSFERASE;                    |
| 420: | <a href="#">3hiy-B</a> | 5.6 | 8.4 | 128 | 382 | 5  | <a href="#">PDB</a> | MOLECULE: MINOR EDITOSOME-ASSOCIATED TUTASE;                |
| 421: | <a href="#">4nkt-A</a> | 5.6 | 8.9 | 123 | 319 | 7  | <a href="#">PDB</a> | MOLECULE: POLY(A) RNA POLYMERASE PROTEIN CID1;              |
| 422: | <a href="#">4nku-A</a> | 5.6 | 9.0 | 130 | 320 | 8  | <a href="#">PDB</a> | MOLECULE: POLY(A) RNA POLYMERASE PROTEIN CID1;              |
| 423: | <a href="#">3wfp-H</a> | 5.6 | 4.4 | 127 | 411 | 12 | <a href="#">PDB</a> | MOLECULE: POLY A POLYMERASE;                                |
| 424: | <a href="#">4e7x-D</a> | 5.6 | 8.3 | 127 | 320 | 6  | <a href="#">PDB</a> | MOLECULE: POLY(A) RNA POLYMERASE PROTEIN CID1;              |
| 425: | <a href="#">5ded-H</a> | 5.5 | 4.9 | 124 | 194 | 7  | <a href="#">PDB</a> | MOLECULE: GTP PYROPHOSPHOKINASE YJBM;                       |
| 426: | <a href="#">4e8f-A</a> | 5.5 | 8.9 | 130 | 327 | 6  | <a href="#">PDB</a> | MOLECULE: POLY(A) RNA POLYMERASE PROTEIN CID1;              |
| 427: | <a href="#">4e7x-A</a> | 5.5 | 8.8 | 126 | 319 | 6  | <a href="#">PDB</a> | MOLECULE: POLY(A) RNA POLYMERASE PROTEIN CID1;              |
| 428: | <a href="#">4e80-B</a> | 5.5 | 8.8 | 121 | 311 | 7  | <a href="#">PDB</a> | MOLECULE: POLY(A) RNA POLYMERASE PROTEIN CID1;              |
| 429: | <a href="#">41zd-A</a> | 5.5 | 4.8 | 123 | 335 | 11 | <a href="#">PDB</a> | MOLECULE: DNA-DIRECTED DNA/RNA POLYMERASE MU;               |
| 430: | <a href="#">3wfp-B</a> | 5.5 | 4.4 | 127 | 450 | 12 | <a href="#">PDB</a> | MOLECULE: POLY A POLYMERASE;                                |
| 431: | <a href="#">4rwo-A</a> | 5.4 | 5.7 | 133 | 347 | 14 | <a href="#">PDB</a> | MOLECULE: RNA (5' -                                         |
| 432: | <a href="#">5f2v-P</a> | 5.4 | 5.0 | 118 | 183 | 8  | <a href="#">PDB</a> | MOLECULE: GTP PYROPHOSPHOKINASE YJBM;                       |
| 433: | <a href="#">4ud4-B</a> | 5.4 | 7.6 | 124 | 317 | 6  | <a href="#">PDB</a> | MOLECULE: POLY(A) RNA POLYMERASE PROTEIN CID1;              |
| 434: | <a href="#">4ep7-A</a> | 5.4 | 8.8 | 121 | 319 | 8  | <a href="#">PDB</a> | MOLECULE: POLY(A) RNA POLYMERASE PROTEIN CID1;              |
| 435: | <a href="#">2gws-A</a> | 5.4 | 4.3 | 124 | 327 | 7  | <a href="#">PDB</a> | MOLECULE: 5'-D(*CP*GP*GP*CP*AP*GP*CP*GP*CP*AP*C)-3' ;       |
| 436: | <a href="#">2gws-E</a> | 5.4 | 4.3 | 124 | 326 | 7  | <a href="#">PDB</a> | MOLECULE: 5'-D(*CP*GP*GP*CP*AP*GP*CP*GP*CP*AP*C)-3' ;       |
| 437: | <a href="#">1rzt-I</a> | 5.4 | 4.3 | 123 | 326 | 9  | <a href="#">PDB</a> | MOLECULE: DNA POLYMERASE LAMBDA;                            |
| 438: | <a href="#">3erc-C</a> | 5.4 | 5.0 | 163 | 445 | 7  | <a href="#">PDB</a> | MOLECULE: CAP-SPECIFIC MRNA (NUCLEOSIDE-2'-0-)-             |
| 439: | <a href="#">3erc-D</a> | 5.4 | 5.0 | 162 | 445 | 7  | <a href="#">PDB</a> | MOLECULE: CAP-SPECIFIC MRNA (NUCLEOSIDE-2'-0-)-             |
| 440: | <a href="#">4xq8-A</a> | 5.4 | 5.2 | 128 | 244 | 9  | <a href="#">PDB</a> | MOLECULE: DNA POLYMERASE LAMBDA;                            |
| 441: | <a href="#">5cj7-B</a> | 5.4 | 5.2 | 128 | 243 | 8  | <a href="#">PDB</a> | MOLECULE: DNA POLYMERASE LAMBDA;                            |
| 442: | <a href="#">5chg-B</a> | 5.4 | 4.8 | 127 | 243 | 8  | <a href="#">PDB</a> | MOLECULE: DNA POLYMERASE LAMBDA;                            |
| 443: | <a href="#">4xrh-A</a> | 5.4 | 5.3 | 128 | 243 | 8  | <a href="#">PDB</a> | MOLECULE: DNA POLYMERASE LAMBDA;                            |
| 444: | <a href="#">5dee-T</a> | 5.4 | 5.0 | 126 | 195 | 10 | <a href="#">PDB</a> | MOLECULE: GTP PYROPHOSPHOKINASE YJBM;                       |
| 445: | <a href="#">5f2v-T</a> | 5.4 | 5.1 | 127 | 195 | 9  | <a href="#">PDB</a> | MOLECULE: GTP PYROPHOSPHOKINASE YJBM;                       |
| 446: | <a href="#">5dec-C</a> | 5.4 | 4.9 | 118 | 183 | 8  | <a href="#">PDB</a> | MOLECULE: GTP PYROPHOSPHOKINASE YJBM;                       |
| 447: | <a href="#">3wfp-F</a> | 5.4 | 4.4 | 126 | 411 | 13 | <a href="#">PDB</a> | MOLECULE: POLY A POLYMERASE;                                |
| 448: | <a href="#">4xq7-A</a> | 5.3 | 5.0 | 134 | 334 | 10 | <a href="#">PDB</a> | MOLECULE: 2'-5'-OLIGOADENYLATE SYNTHASE-LIKE PROTEIN;       |
| 449: | <a href="#">5dec-D</a> | 5.3 | 4.4 | 123 | 189 | 9  | <a href="#">PDB</a> | MOLECULE: GTP PYROPHOSPHOKINASE YJBM;                       |
| 450: | <a href="#">4at9-A</a> | 5.3 | 9.1 | 139 | 332 | 13 | <a href="#">PDB</a> | MOLECULE: INTERLEUKIN ENHANCER-BINDING FACTOR 2;            |
| 451: | <a href="#">5a2z-B</a> | 5.3 | 9.1 | 140 | 462 | 11 | <a href="#">PDB</a> | MOLECULE: MITOCHONDRIAL PROTEIN;                            |
| 452: | <a href="#">5dee-V</a> | 5.3 | 4.9 | 116 | 180 | 8  | <a href="#">PDB</a> | MOLECULE: GTP PYROPHOSPHOKINASE YJBM;                       |
| 453: | <a href="#">5f2v-Q</a> | 5.3 | 4.8 | 114 | 179 | 8  | <a href="#">PDB</a> | MOLECULE: GTP PYROPHOSPHOKINASE YJBM;                       |
| 454: | <a href="#">4ep7-B</a> | 5.3 | 8.8 | 123 | 315 | 6  | <a href="#">PDB</a> | MOLECULE: POLY(A) RNA POLYMERASE PROTEIN CID1;              |
| 455: | <a href="#">4z6c-A</a> | 5.3 | 4.6 | 123 | 325 | 10 | <a href="#">PDB</a> | MOLECULE: DNA (5'-D(*CP*CP*GP*AP*CP*GP*TP*CP*GP*CP*AP*TP*CP |
| 456: | <a href="#">2ga9-D</a> | 5.3 | 5.0 | 162 | 445 | 7  | <a href="#">PDB</a> | MOLECULE: CAP-SPECIFIC MRNA (NUCLEOSIDE-2'-0-)-METHYLTRANSF |
| 457: | <a href="#">5dee-R</a> | 5.3 | 5.1 | 119 | 184 | 8  | <a href="#">PDB</a> | MOLECULE: GTP PYROPHOSPHOKINASE YJBM;                       |
| 458: | <a href="#">5f2v-R</a> | 5.3 | 5.1 | 119 | 184 | 8  | <a href="#">PDB</a> | MOLECULE: GTP PYROPHOSPHOKINASE YJBM;                       |
| 459: | <a href="#">5f2v-Y</a> | 5.3 | 5.4 | 119 | 182 | 8  | <a href="#">PDB</a> | MOLECULE: GTP PYROPHOSPHOKINASE YJBM;                       |
| 460: | <a href="#">5dee-P</a> | 5.3 | 5.4 | 120 | 183 | 8  | <a href="#">PDB</a> | MOLECULE: GTP PYROPHOSPHOKINASE YJBM;                       |
| 461: | <a href="#">5f2v-V</a> | 5.3 | 5.1 | 117 | 180 | 8  | <a href="#">PDB</a> | MOLECULE: GTP PYROPHOSPHOKINASE YJBM;                       |
| 462: | <a href="#">4yd1-A</a> | 5.3 | 4.2 | 117 | 333 | 9  | <a href="#">PDB</a> | MOLECULE: DNA-DIRECTED DNA/RNA POLYMERASE MU;               |
| 463: | <a href="#">5cj7-A</a> | 5.3 | 5.5 | 129 | 246 | 8  | <a href="#">PDB</a> | MOLECULE: DNA POLYMERASE LAMBDA;                            |
| 464: | <a href="#">5cp2-A</a> | 5.3 | 5.2 | 128 | 240 | 8  | <a href="#">PDB</a> | MOLECULE: DNA POLYMERASE LAMBDA;                            |
| 465: | <a href="#">5ca7-A</a> | 5.3 | 5.2 | 128 | 243 | 8  | <a href="#">PDB</a> | MOLECULE: DNA POLYMERASE LAMBDA;                            |
| 466: | <a href="#">4k4i-M</a> | 5.3 | 5.3 | 127 | 329 | 9  | <a href="#">PDB</a> | MOLECULE: DNA POLYMERASE LAMBDA;                            |
| 467: | <a href="#">5dec-B</a> | 5.3 | 5.0 | 126 | 191 | 9  | <a href="#">PDB</a> | MOLECULE: GTP PYROPHOSPHOKINASE YJBM;                       |
| 468: | <a href="#">5dee-S</a> | 5.3 | 5.1 | 118 | 182 | 8  | <a href="#">PDB</a> | MOLECULE: GTP PYROPHOSPHOKINASE YJBM;                       |
| 469: | <a href="#">5dee-Q</a> | 5.3 | 4.9 | 115 | 179 | 9  | <a href="#">PDB</a> | MOLECULE: GTP PYROPHOSPHOKINASE YJBM;                       |
| 470: | <a href="#">5f2v-Z</a> | 5.3 | 4.9 | 115 | 179 | 9  | <a href="#">PDB</a> | MOLECULE: GTP PYROPHOSPHOKINASE YJBM;                       |
| 471: | <a href="#">3er9-B</a> | 5.3 | 5.0 | 162 | 445 | 7  | <a href="#">PDB</a> | MOLECULE: CAP-SPECIFIC MRNA (NUCLEOSIDE-2'-0-)-METHYLTRANSF |
| 472: | <a href="#">3wfp-C</a> | 5.3 | 4.4 | 131 | 419 | 12 | <a href="#">PDB</a> | MOLECULE: POLY A POLYMERASE;                                |
| 473: | <a href="#">5hc9-B</a> | 5.3 | 3.9 | 127 | 410 | 11 | <a href="#">PDB</a> | MOLECULE: TRNA NUCLEOTIDYL TRANSFERASE-RELATED PROTEIN;     |
| 474: | <a href="#">4rwn-A</a> | 5.2 | 5.7 | 132 | 349 | 14 | <a href="#">PDB</a> | MOLECULE: 2'-5'-OLIGOADENYLATE SYNTHASE 1;                  |
| 475: | <a href="#">4at8-A</a> | 5.2 | 7.0 | 134 | 333 | 10 | <a href="#">PDB</a> | MOLECULE: INTERLEUKIN ENHANCER-BINDING FACTOR 2;            |
| 476: | <a href="#">4at7-A</a> | 5.2 | 9.2 | 138 | 334 | 13 | <a href="#">PDB</a> | MOLECULE: INTERLEUKIN ENHANCER-BINDING FACTOR 2;            |
| 477: | <a href="#">5dee-O</a> | 5.2 | 4.9 | 119 | 184 | 8  | <a href="#">PDB</a> | MOLECULE: GTP PYROPHOSPHOKINASE YJBM;                       |
| 478: | <a href="#">5a30-B</a> | 5.2 | 9.2 | 139 | 464 | 11 | <a href="#">PDB</a> | MOLECULE: MITOCHONDRIAL PROTEIN;                            |
| 479: | <a href="#">5f2v-S</a> | 5.2 | 4.9 | 117 | 182 | 9  | <a href="#">PDB</a> | MOLECULE: GTP PYROPHOSPHOKINASE YJBM;                       |
| 480: | <a href="#">5dee-X</a> | 5.2 | 4.8 | 114 | 181 | 8  | <a href="#">PDB</a> | MOLECULE: GTP PYROPHOSPHOKINASE YJBM;                       |



|      |                        |     |     |     |     |    |                     |                                                             |
|------|------------------------|-----|-----|-----|-----|----|---------------------|-------------------------------------------------------------|
| 481: | <a href="#">4e7x-C</a> | 5.2 | 8.3 | 119 | 316 | 6  | <a href="#">PDB</a> | MOLECULE: POLY(A) RNA POLYMERASE PROTEIN CID1;              |
| 482: | <a href="#">4e80-C</a> | 5.2 | 8.4 | 120 | 330 | 7  | <a href="#">PDB</a> | MOLECULE: POLY(A) RNA POLYMERASE PROTEIN CID1;              |
| 483: | <a href="#">3mdc-A</a> | 5.2 | 5.4 | 123 | 312 | 8  | <a href="#">PDB</a> | MOLECULE: DNA POLYMERASE LAMBDA;                            |
| 484: | <a href="#">3upq-A</a> | 5.2 | 5.1 | 119 | 308 | 8  | <a href="#">PDB</a> | MOLECULE: DNA POLYMERASE LAMBDA;                            |
| 485: | <a href="#">1xsl-E</a> | 5.2 | 4.5 | 124 | 325 | 7  | <a href="#">PDB</a> | MOLECULE: 5'-D(*CP*GP*GP*CP*AP*GP*CP*GP*CP*AP*C)-3' ;       |
| 486: | <a href="#">5dee-Y</a> | 5.2 | 5.3 | 119 | 182 | 8  | <a href="#">PDB</a> | MOLECULE: GTP PYROPHOSPHOKINASE YJBM;                       |
| 487: | <a href="#">2gaf-D</a> | 5.2 | 5.1 | 162 | 447 | 7  | <a href="#">PDB</a> | MOLECULE: CAP-SPECIFIC MRNA (NUCLEOSIDE-2'-0-)-             |
| 488: | <a href="#">3owg-A</a> | 5.2 | 4.9 | 161 | 457 | 7  | <a href="#">PDB</a> | MOLECULE: POLY(A) POLYMERASE CATALYTIC SUBUNIT;             |
| 489: | <a href="#">3er8-C</a> | 5.2 | 4.9 | 161 | 445 | 7  | <a href="#">PDB</a> | MOLECULE: CAP-SPECIFIC MRNA (NUCLEOSIDE-2'-0-)-METHYLTRANSF |
| 490: | <a href="#">5iio-M</a> | 5.2 | 5.3 | 128 | 326 | 8  | <a href="#">PDB</a> | MOLECULE: DNA (5'-D(*CP*GP*GP*CP*(80G)P*GP*TP*AP*CP*TP*G)-3 |
| 491: | <a href="#">5iio-I</a> | 5.2 | 4.2 | 124 | 326 | 7  | <a href="#">PDB</a> | MOLECULE: DNA (5'-D(*CP*GP*GP*CP*(80G)P*GP*TP*AP*CP*TP*G)-3 |
| 492: | <a href="#">5iij-A</a> | 5.2 | 5.5 | 126 | 314 | 8  | <a href="#">PDB</a> | MOLECULE: DNA POLYMERASE LAMBDA;                            |
| 493: | <a href="#">5cwr-B</a> | 5.2 | 5.5 | 127 | 323 | 8  | <a href="#">PDB</a> | MOLECULE: DNA POLYMERASE LAMBDA;                            |
| 494: | <a href="#">5f2v-U</a> | 5.2 | 5.1 | 122 | 186 | 8  | <a href="#">PDB</a> | MOLECULE: GTP PYROPHOSPHOKINASE YJBM;                       |
| 495: | <a href="#">5dee-U</a> | 5.2 | 5.1 | 122 | 186 | 7  | <a href="#">PDB</a> | MOLECULE: GTP PYROPHOSPHOKINASE YJBM;                       |
| 496: | <a href="#">5f2v-X</a> | 5.2 | 5.1 | 117 | 181 | 8  | <a href="#">PDB</a> | MOLECULE: GTP PYROPHOSPHOKINASE YJBM;                       |
| 497: | <a href="#">3oux-A</a> | 5.2 | 4.8 | 116 | 503 | 9  | <a href="#">PDB</a> | MOLECULE: CATENIN BETA-1;                                   |
| 498: | <a href="#">5ded-D</a> | 5.1 | 4.5 | 125 | 188 | 8  | <a href="#">PDB</a> | MOLECULE: GTP PYROPHOSPHOKINASE YJBM;                       |
| 499: | <a href="#">2be3-A</a> | 5.1 | 5.0 | 126 | 203 | 5  | <a href="#">PDB</a> | MOLECULE: GTP PYROPHOSPHOKINASE;                            |
| 500: | <a href="#">5ded-F</a> | 5.1 | 4.3 | 123 | 192 | 8  | <a href="#">PDB</a> | MOLECULE: GTP PYROPHOSPHOKINASE YJBM;                       |
| 501: | <a href="#">4atb-A</a> | 5.1 | 9.5 | 138 | 334 | 13 | <a href="#">PDB</a> | MOLECULE: INTERLEUKIN ENHANCER-BINDING FACTOR 2;            |
| 502: | <a href="#">4atb-C</a> | 5.1 | 9.1 | 139 | 331 | 13 | <a href="#">PDB</a> | MOLECULE: INTERLEUKIN ENHANCER-BINDING FACTOR 2;            |
| 503: | <a href="#">5a2v-A</a> | 5.1 | 8.6 | 141 | 470 | 12 | <a href="#">PDB</a> | MOLECULE: MITOCHONDRIAL PROTEIN;                            |
| 504: | <a href="#">2m2u-A</a> | 5.1 | 4.3 | 104 | 174 | 8  | <a href="#">PDB</a> | MOLECULE: REPAIR DNA POLYMERASE X;                          |
| 505: | <a href="#">5cwr-A</a> | 5.1 | 5.0 | 124 | 325 | 7  | <a href="#">PDB</a> | MOLECULE: DNA POLYMERASE LAMBDA;                            |
| 506: | <a href="#">3hx0-K</a> | 5.1 | 5.5 | 129 | 327 | 8  | <a href="#">PDB</a> | MOLECULE: DNA POLYMERASE LAMBDA;                            |
| 507: | <a href="#">2gws-I</a> | 5.1 | 4.3 | 124 | 326 | 9  | <a href="#">PDB</a> | MOLECULE: 5'-D(*CP*GP*GP*CP*AP*GP*CP*GP*CP*AP*C)-3' ;       |
| 508: | <a href="#">3er8-D</a> | 5.1 | 4.9 | 162 | 445 | 7  | <a href="#">PDB</a> | MOLECULE: CAP-SPECIFIC MRNA (NUCLEOSIDE-2'-0-)-METHYLTRANSF |
| 509: | <a href="#">3hx0-P</a> | 5.1 | 5.4 | 128 | 327 | 8  | <a href="#">PDB</a> | MOLECULE: DNA POLYMERASE LAMBDA;                            |
| 510: | <a href="#">3owg-B</a> | 5.1 | 5.0 | 161 | 457 | 7  | <a href="#">PDB</a> | MOLECULE: POLY(A) POLYMERASE CATALYTIC SUBUNIT;             |
| 511: | <a href="#">4qzg-A</a> | 5.1 | 4.7 | 124 | 340 | 7  | <a href="#">PDB</a> | MOLECULE: DNA NUCLEOTIDYLEXOTRANSFERASE;                    |
| 512: | <a href="#">4k4g-M</a> | 5.1 | 4.4 | 128 | 328 | 8  | <a href="#">PDB</a> | MOLECULE: DNA POLYMERASE LAMBDA;                            |
| 513: | <a href="#">4k4h-M</a> | 5.1 | 5.3 | 127 | 325 | 9  | <a href="#">PDB</a> | MOLECULE: DNA POLYMERASE LAMBDA;                            |
| 514: | <a href="#">5iio-E</a> | 5.1 | 4.3 | 123 | 325 | 8  | <a href="#">PDB</a> | MOLECULE: DNA (5'-D(*CP*GP*GP*CP*(80G)P*GP*TP*AP*CP*TP*G)-3 |
| 515: | <a href="#">4k4h-E</a> | 5.1 | 5.2 | 126 | 326 | 8  | <a href="#">PDB</a> | MOLECULE: DNA POLYMERASE LAMBDA;                            |
| 516: | <a href="#">5iii-A</a> | 5.1 | 5.2 | 125 | 314 | 9  | <a href="#">PDB</a> | MOLECULE: DNA POLYMERASE LAMBDA;                            |
| 517: | <a href="#">5dkw-B</a> | 5.1 | 5.5 | 129 | 319 | 9  | <a href="#">PDB</a> | MOLECULE: DNA POLYMERASE LAMBDA;                            |
| 518: | <a href="#">4xa5-A</a> | 5.1 | 5.2 | 125 | 314 | 9  | <a href="#">PDB</a> | MOLECULE: DNA POLYMERASE LAMBDA;                            |
| 519: | <a href="#">5ded-E</a> | 5.1 | 4.3 | 122 | 190 | 8  | <a href="#">PDB</a> | MOLECULE: GTP PYROPHOSPHOKINASE YJBM;                       |
| 520: | <a href="#">319d-B</a> | 5.1 | 5.0 | 121 | 193 | 7  | <a href="#">PDB</a> | MOLECULE: PUTATIVE GTP PYROPHOSPHOKINASE;                   |
| 521: | <a href="#">1g3j-A</a> | 5.1 | 4.8 | 117 | 522 | 9  | <a href="#">PDB</a> | MOLECULE: BETA-CATENIN ARMADILLO REPEAT REGION;             |
| 522: | <a href="#">1v18-A</a> | 5.1 | 4.8 | 117 | 507 | 9  | <a href="#">PDB</a> | MOLECULE: BETA-CATENIN;                                     |
| 523: | <a href="#">1t08-A</a> | 5.1 | 4.8 | 116 | 510 | 9  | <a href="#">PDB</a> | MOLECULE: BETA-CATENIN;                                     |
| 524: | <a href="#">4rwp-A</a> | 5.0 | 5.3 | 136 | 346 | 13 | <a href="#">PDB</a> | MOLECULE: 2'-5'-OLIGOADENYLATE SYNTHASE 1;                  |
| 525: | <a href="#">319d-A</a> | 5.0 | 5.0 | 124 | 198 | 6  | <a href="#">PDB</a> | MOLECULE: PUTATIVE GTP PYROPHOSPHOKINASE;                   |
| 526: | <a href="#">5f2v-W</a> | 5.0 | 5.1 | 120 | 187 | 8  | <a href="#">PDB</a> | MOLECULE: GTP PYROPHOSPHOKINASE YJBM;                       |
| 527: | <a href="#">3hiy-A</a> | 5.0 | 8.5 | 123 | 382 | 6  | <a href="#">PDB</a> | MOLECULE: MINOR EDITOSOME-ASSOCIATED TUTASE;                |
| 528: | <a href="#">4e7x-B</a> | 5.0 | 8.9 | 121 | 312 | 6  | <a href="#">PDB</a> | MOLECULE: POLY(A) RNA POLYMERASE PROTEIN CID1;              |
| 529: | <a href="#">4nkt-B</a> | 5.0 | 9.0 | 117 | 308 | 6  | <a href="#">PDB</a> | MOLECULE: POLY(A) RNA POLYMERASE PROTEIN CID1;              |
| 530: | <a href="#">4k96-A</a> | 5.0 | 8.5 | 133 | 355 | 6  | <a href="#">PDB</a> | MOLECULE: CYCLIC GMP-AMP SYNTHASE;                          |
| 531: | <a href="#">2pfo-A</a> | 5.0 | 5.1 | 120 | 323 | 9  | <a href="#">PDB</a> | MOLECULE: DNA POLYMERASE LAMBDA;                            |
| 532: | <a href="#">1rzt-E</a> | 5.0 | 4.3 | 124 | 326 | 9  | <a href="#">PDB</a> | MOLECULE: DNA POLYMERASE LAMBDA;                            |
| 533: | <a href="#">5f2v-O</a> | 5.0 | 5.1 | 120 | 184 | 8  | <a href="#">PDB</a> | MOLECULE: GTP PYROPHOSPHOKINASE YJBM;                       |
| 534: | <a href="#">5d46-A</a> | 5.0 | 4.6 | 122 | 346 | 7  | <a href="#">PDB</a> | MOLECULE: TERMINAL DEOXYNUCLEOTIDYLTRANSFERASE;             |
| 535: | <a href="#">5iio-A</a> | 5.0 | 5.3 | 128 | 327 | 9  | <a href="#">PDB</a> | MOLECULE: DNA (5'-D(*CP*GP*GP*CP*(80G)P*GP*TP*AP*CP*TP*G)-3 |
| 536: | <a href="#">4x4t-C</a> | 5.0 | 3.7 | 124 | 436 | 9  | <a href="#">PDB</a> | MOLECULE: CCA-ADDING ENZYME;                                |
| 537: | <a href="#">3ouy-A</a> | 5.0 | 3.5 | 124 | 441 | 8  | <a href="#">PDB</a> | MOLECULE: CCA-ADDING ENZYME;                                |
| 538: | <a href="#">4wcl-A</a> | 5.0 | 3.9 | 116 | 364 | 11 | <a href="#">PDB</a> | MOLECULE: POLY A POLYMERASE;                                |
| 539: | <a href="#">3ifq-A</a> | 5.0 | 4.8 | 117 | 546 | 9  | <a href="#">PDB</a> | MOLECULE: PLAKOGLOBIN;                                      |
| 540: | <a href="#">4at8-C</a> | 4.9 | 7.1 | 134 | 332 | 13 | <a href="#">PDB</a> | MOLECULE: INTERLEUKIN ENHANCER-BINDING FACTOR 2;            |
| 541: | <a href="#">5dee-Z</a> | 4.9 | 4.8 | 114 | 179 | 8  | <a href="#">PDB</a> | MOLECULE: GTP PYROPHOSPHOKINASE YJBM;                       |
| 542: | <a href="#">3hj1-A</a> | 4.9 | 8.5 | 123 | 384 | 6  | <a href="#">PDB</a> | MOLECULE: MINOR EDITOSOME-ASSOCIATED TUTASE;                |
| 543: | <a href="#">4k99-A</a> | 4.9 | 9.1 | 134 | 354 | 5  | <a href="#">PDB</a> | MOLECULE: CYCLIC GMP-AMP SYNTHASE;                          |



|                          |      |                        |     |      |     |     |    |                     |                                                  |
|--------------------------|------|------------------------|-----|------|-----|-----|----|---------------------|--------------------------------------------------|
| <input type="checkbox"/> | 544: | <a href="#">5dee-W</a> | 4.9 | 5.4  | 122 | 187 | 7  | <a href="#">PDB</a> | MOLECULE: GTP PYROPHOSPHOKINASE YJBM;            |
| <input type="checkbox"/> | 545: | <a href="#">4i27-A</a> | 4.9 | 4.6  | 121 | 361 | 8  | <a href="#">PDB</a> | MOLECULE: DNA NUCLEOTIDYLEXOTRANSFERASE;         |
| <input type="checkbox"/> | 546: | <a href="#">3wfr-F</a> | 4.9 | 4.3  | 128 | 439 | 13 | <a href="#">PDB</a> | MOLECULE: RNA (74-MER);                          |
| <input type="checkbox"/> | 547: | <a href="#">1qz7-A</a> | 4.9 | 4.7  | 116 | 524 | 9  | <a href="#">PDB</a> | MOLECULE: BETA-CATENIN;                          |
| <input type="checkbox"/> | 548: | <a href="#">1th1-B</a> | 4.9 | 4.8  | 118 | 513 | 8  | <a href="#">PDB</a> | MOLECULE: BETA-CATENIN;                          |
| <input type="checkbox"/> | 549: | <a href="#">2ii2-A</a> | 4.8 | 7.7  | 91  | 304 | 9  | <a href="#">PDB</a> | MOLECULE: ALPHA-11 GIARDIN;                      |
| <input type="checkbox"/> | 550: | <a href="#">5a2w-B</a> | 4.8 | 9.2  | 139 | 467 | 11 | <a href="#">PDB</a> | MOLECULE: MITOCHONDRIAL PROTEIN;                 |
| <input type="checkbox"/> | 551: | <a href="#">4at8-B</a> | 4.8 | 9.2  | 144 | 316 | 8  | <a href="#">PDB</a> | MOLECULE: INTERLEUKIN ENHANCER-BINDING FACTOR 2; |
| <input type="checkbox"/> | 552: | <a href="#">4k97-A</a> | 4.8 | 8.7  | 136 | 351 | 4  | <a href="#">PDB</a> | MOLECULE: CYCLIC GMP-AMP SYNTHASE;               |
| <input type="checkbox"/> | 553: | <a href="#">4k98-A</a> | 4.8 | 7.0  | 134 | 354 | 4  | <a href="#">PDB</a> | MOLECULE: CYCLIC GMP-AMP SYNTHASE;               |
| <input type="checkbox"/> | 554: | <a href="#">3au2-A</a> | 4.8 | 4.0  | 110 | 575 | 7  | <a href="#">PDB</a> | MOLECULE: DNA POLYMERASE BETA FAMILY (X FAMILY); |
| <input type="checkbox"/> | 555: | <a href="#">4lzg-A</a> | 4.8 | 5.4  | 117 | 325 | 9  | <a href="#">PDB</a> | MOLECULE: DNA-DIRECTED DNA/RNA POLYMERASE MU;    |
| <input type="checkbox"/> | 556: | <a href="#">3b0x-A</a> | 4.8 | 4.2  | 109 | 575 | 7  | <a href="#">PDB</a> | MOLECULE: DNA POLYMERASE BETA FAMILY (X FAMILY); |
| <input type="checkbox"/> | 557: | <a href="#">3b0y-A</a> | 4.8 | 4.2  | 109 | 575 | 8  | <a href="#">PDB</a> | MOLECULE: DNA POLYMERASE BETA FAMILY (X FAMILY); |
| <input type="checkbox"/> | 558: | <a href="#">1jqr-A</a> | 4.8 | 5.9  | 108 | 174 | 8  | <a href="#">PDB</a> | MOLECULE: DNA POLYMERASE BETA-LIKE;              |
| <input type="checkbox"/> | 559: | <a href="#">3wfr-E</a> | 4.8 | 4.3  | 127 | 439 | 12 | <a href="#">PDB</a> | MOLECULE: RNA (74-MER);                          |
| <input type="checkbox"/> | 560: | <a href="#">3wfg-G</a> | 4.8 | 4.3  | 127 | 439 | 11 | <a href="#">PDB</a> | MOLECULE: RNA (73-MER);                          |
| <input type="checkbox"/> | 561: | <a href="#">1luj-A</a> | 4.8 | 4.8  | 116 | 501 | 9  | <a href="#">PDB</a> | MOLECULE: CATENIN BETA-1;                        |
| <input type="checkbox"/> | 562: | <a href="#">3wfr-H</a> | 4.7 | 4.1  | 129 | 463 | 11 | <a href="#">PDB</a> | MOLECULE: RNA (74-MER);                          |
| <input type="checkbox"/> | 563: | <a href="#">1jaj-A</a> | 4.7 | 4.6  | 110 | 174 | 7  | <a href="#">PDB</a> | MOLECULE: DNA POLYMERASE BETA-LIKE PROTEIN;      |
| <input type="checkbox"/> | 564: | <a href="#">2z6g-A</a> | 4.7 | 4.6  | 116 | 550 | 7  | <a href="#">PDB</a> | MOLECULE: B-CATENIN;                             |
| <input type="checkbox"/> | 565: | <a href="#">5a2y-B</a> | 4.7 | 9.3  | 141 | 464 | 11 | <a href="#">PDB</a> | MOLECULE: MITOCHONDRIAL PROTEIN;                 |
| <input type="checkbox"/> | 566: | <a href="#">5a2x-A</a> | 4.7 | 9.0  | 141 | 468 | 11 | <a href="#">PDB</a> | MOLECULE: MITOCHONDRIAL PROTEIN;                 |
| <input type="checkbox"/> | 567: | <a href="#">5a2x-B</a> | 4.7 | 9.0  | 139 | 467 | 11 | <a href="#">PDB</a> | MOLECULE: MITOCHONDRIAL PROTEIN;                 |
| <input type="checkbox"/> | 568: | <a href="#">4e80-D</a> | 4.7 | 9.1  | 120 | 324 | 6  | <a href="#">PDB</a> | MOLECULE: POLY(A) RNA POLYMERASE PROTEIN CID1;   |
| <input type="checkbox"/> | 569: | <a href="#">4nku-B</a> | 4.7 | 9.0  | 117 | 310 | 6  | <a href="#">PDB</a> | MOLECULE: POLY(A) RNA POLYMERASE PROTEIN CID1;   |
| <input type="checkbox"/> | 570: | <a href="#">5a2v-B</a> | 4.7 | 8.3  | 148 | 472 | 11 | <a href="#">PDB</a> | MOLECULE: MITOCHONDRIAL PROTEIN;                 |
| <input type="checkbox"/> | 571: | <a href="#">4i2i-A</a> | 4.7 | 5.2  | 123 | 338 | 8  | <a href="#">PDB</a> | MOLECULE: DNA NUCLEOTIDYLEXOTRANSFERASE;         |
| <input type="checkbox"/> | 572: | <a href="#">2m2v-A</a> | 4.7 | 5.6  | 114 | 174 | 8  | <a href="#">PDB</a> | MOLECULE: REPAIR DNA POLYMERASE X;               |
| <input type="checkbox"/> | 573: | <a href="#">3wfg-E</a> | 4.7 | 4.2  | 126 | 439 | 12 | <a href="#">PDB</a> | MOLECULE: RNA (73-MER);                          |
| <input type="checkbox"/> | 574: | <a href="#">1q78-A</a> | 4.6 | 6.1  | 136 | 470 | 10 | <a href="#">PDB</a> | MOLECULE: POLY(A) POLYMERASE ALPHA;              |
| <input type="checkbox"/> | 575: | <a href="#">5a2y-A</a> | 4.6 | 9.2  | 141 | 468 | 11 | <a href="#">PDB</a> | MOLECULE: MITOCHONDRIAL PROTEIN;                 |
| <input type="checkbox"/> | 576: | <a href="#">3hj4-A</a> | 4.6 | 8.7  | 126 | 381 | 6  | <a href="#">PDB</a> | MOLECULE: MINOR EDITOSOME-ASSOCIATED TUTASE;     |
| <input type="checkbox"/> | 577: | <a href="#">3hj4-B</a> | 4.6 | 8.4  | 123 | 382 | 7  | <a href="#">PDB</a> | MOLECULE: MINOR EDITOSOME-ASSOCIATED TUTASE;     |
| <input type="checkbox"/> | 578: | <a href="#">4e8f-B</a> | 4.6 | 8.8  | 125 | 319 | 6  | <a href="#">PDB</a> | MOLECULE: POLY(A) RNA POLYMERASE PROTEIN CID1;   |
| <input type="checkbox"/> | 579: | <a href="#">4atb-B</a> | 4.6 | 9.4  | 144 | 319 | 8  | <a href="#">PDB</a> | MOLECULE: INTERLEUKIN ENHANCER-BINDING FACTOR 2; |
| <input type="checkbox"/> | 580: | <a href="#">3v7l-A</a> | 4.6 | 5.1  | 122 | 325 | 10 | <a href="#">PDB</a> | MOLECULE: DNA POLYMERASE BETA;                   |
| <input type="checkbox"/> | 581: | <a href="#">3auo-A</a> | 4.6 | 4.3  | 107 | 572 | 8  | <a href="#">PDB</a> | MOLECULE: DNA POLYMERASE BETA FAMILY (X FAMILY); |
| <input type="checkbox"/> | 582: | <a href="#">2ihm-B</a> | 4.6 | 4.3  | 115 | 336 | 8  | <a href="#">PDB</a> | MOLECULE: DNA POLYMERASE MU;                     |
| <input type="checkbox"/> | 583: | <a href="#">4k8v-A</a> | 4.6 | 7.5  | 141 | 362 | 6  | <a href="#">PDB</a> | MOLECULE: CYCLIC GMP-AMP SYNTHASE;               |
| <input type="checkbox"/> | 584: | <a href="#">1jpw-A</a> | 4.6 | 4.7  | 118 | 502 | 8  | <a href="#">PDB</a> | MOLECULE: BETA-CATENIN;                          |
| <input type="checkbox"/> | 585: | <a href="#">4at8-D</a> | 4.5 | 7.2  | 142 | 316 | 8  | <a href="#">PDB</a> | MOLECULE: INTERLEUKIN ENHANCER-BINDING FACTOR 2; |
| <input type="checkbox"/> | 586: | <a href="#">2w9m-A</a> | 4.5 | 7.0  | 120 | 541 | 13 | <a href="#">PDB</a> | MOLECULE: POLYMERASE X;                          |
| <input type="checkbox"/> | 587: | <a href="#">3auo-B</a> | 4.5 | 4.2  | 104 | 572 | 9  | <a href="#">PDB</a> | MOLECULE: DNA POLYMERASE BETA FAMILY (X FAMILY); |
| <input type="checkbox"/> | 588: | <a href="#">2m2t-A</a> | 4.5 | 4.2  | 102 | 174 | 8  | <a href="#">PDB</a> | MOLECULE: REPAIR DNA POLYMERASE X;               |
| <input type="checkbox"/> | 589: | <a href="#">2m2w-A</a> | 4.5 | 5.5  | 111 | 174 | 7  | <a href="#">PDB</a> | MOLECULE: REPAIR DNA POLYMERASE X;               |
| <input type="checkbox"/> | 590: | <a href="#">4wc7-A</a> | 4.5 | 4.0  | 115 | 367 | 10 | <a href="#">PDB</a> | MOLECULE: POLY A POLYMERASE;                     |
| <input type="checkbox"/> | 591: | <a href="#">1vj7-A</a> | 4.4 | 5.2  | 112 | 326 | 12 | <a href="#">PDB</a> | MOLECULE: BIFUNCTIONAL RELA/SPOT;                |
| <input type="checkbox"/> | 592: | <a href="#">1ze1-A</a> | 4.4 | 4.2  | 136 | 293 | 10 | <a href="#">PDB</a> | MOLECULE: HYPOTHETICAL PROTEIN RV2827C;          |
| <input type="checkbox"/> | 593: | <a href="#">5cwu-A</a> | 4.3 | 4.6  | 98  | 298 | 11 | <a href="#">PDB</a> | MOLECULE: NUCLEOPORIN NUP188;                    |
| <input type="checkbox"/> | 594: | <a href="#">1dk5-A</a> | 4.3 | 12.2 | 92  | 316 | 7  | <a href="#">PDB</a> | MOLECULE: ANNEXIN 24 (CA32);                     |
| <input type="checkbox"/> | 595: | <a href="#">4k96-B</a> | 4.3 | 7.0  | 128 | 358 | 8  | <a href="#">PDB</a> | MOLECULE: CYCLIC GMP-AMP SYNTHASE;               |
| <input type="checkbox"/> | 596: | <a href="#">1r8b-A</a> | 4.3 | 4.2  | 114 | 437 | 9  | <a href="#">PDB</a> | MOLECULE: TRNA NUCLEOTIDYLTRANSFERASE;           |
| <input type="checkbox"/> | 597: | <a href="#">3au6-A</a> | 4.3 | 7.8  | 132 | 562 | 8  | <a href="#">PDB</a> | MOLECULE: DNA POLYMERASE BETA FAMILY (X FAMILY); |
| <input type="checkbox"/> | 598: | <a href="#">4wc6-A</a> | 4.3 | 4.1  | 115 | 367 | 9  | <a href="#">PDB</a> | MOLECULE: POLY A POLYMERASE;                     |
| <input type="checkbox"/> | 599: | <a href="#">3c2g-A</a> | 4.2 | 4.5  | 129 | 618 | 9  | <a href="#">PDB</a> | MOLECULE: SYS-1 PROTEIN;                         |
| <input type="checkbox"/> | 600: | <a href="#">4x4p-G</a> | 4.2 | 4.1  | 128 | 428 | 7  | <a href="#">PDB</a> | MOLECULE: CCA-ADDING ENZYME;                     |
| <input type="checkbox"/> | 601: | <a href="#">4wbz-B</a> | 4.2 | 4.0  | 112 | 350 | 10 | <a href="#">PDB</a> | MOLECULE: POLY A POLYMERASE;                     |
| <input type="checkbox"/> | 602: | <a href="#">4wc0-B</a> | 4.2 | 4.0  | 112 | 350 | 9  | <a href="#">PDB</a> | MOLECULE: POLY A POLYMERASE;                     |
| <input type="checkbox"/> | 603: | <a href="#">4woy-A</a> | 4.1 | 5.4  | 133 | 329 | 13 | <a href="#">PDB</a> | MOLECULE: MITOCHONDRIAL DYNAMICS PROTEIN MID49;  |
| <input type="checkbox"/> | 604: | <a href="#">3hj1-B</a> | 4.1 | 8.7  | 126 | 387 | 6  | <a href="#">PDB</a> | MOLECULE: MINOR EDITOSOME-ASSOCIATED TUTASE;     |
| <input type="checkbox"/> | 605: | <a href="#">4x4p-C</a> | 4.1 | 7.1  | 119 | 434 | 8  | <a href="#">PDB</a> | MOLECULE: CCA-ADDING ENZYME;                     |
| <input type="checkbox"/> | 606: | <a href="#">3ups-A</a> | 4.1 | 4.1  | 87  | 108 | 10 | <a href="#">PDB</a> | MOLECULE: IOJAP-LIKE PROTEIN;                    |

|      |                        |     |      |     |     |    |                     |                                                            |
|------|------------------------|-----|------|-----|-----|----|---------------------|------------------------------------------------------------|
| 607: | <a href="#">5hzd-A</a> | 4.1 | 7.3  | 132 | 476 | 8  | <a href="#">PDB</a> | MOLECULE: 3' TERMINAL URIDYLYL TRANSFERASE;                |
| 608: | <a href="#">4r10-A</a> | 4.1 | 4.9  | 118 | 537 | 9  | <a href="#">PDB</a> | MOLECULE: PROTEIN HUMPBACK-2;                              |
| 609: | <a href="#">4lt6-A</a> | 4.0 | 6.2  | 137 | 467 | 7  | <a href="#">PDB</a> | MOLECULE: POLY(A) POLYMERASE GAMMA;                        |
| 610: | <a href="#">4r0z-A</a> | 4.0 | 5.0  | 94  | 557 | 9  | <a href="#">PDB</a> | MOLECULE: PROTEIN HUMPBACK-2;                              |
| 611: | <a href="#">4txz-A</a> | 4.0 | 8.7  | 137 | 370 | 9  | <a href="#">PDB</a> | MOLECULE: CYCLIC AMP-GMP SYNTHASE;                         |
| 612: | <a href="#">5a2z-A</a> | 3.9 | 9.0  | 142 | 466 | 11 | <a href="#">PDB</a> | MOLECULE: MITOCHONDRIAL PROTEIN;                           |
| 613: | <a href="#">4r11-E</a> | 3.9 | 4.8  | 120 | 508 | 9  | <a href="#">PDB</a> | MOLECULE: PROTEIN HUMPBACK-2;                              |
| 614: | <a href="#">4k9b-A</a> | 3.8 | 7.5  | 131 | 355 | 8  | <a href="#">PDB</a> | MOLECULE: CYCLIC GMP-AMP SYNTHASE;                         |
| 615: | <a href="#">4txy-B</a> | 3.8 | 8.6  | 137 | 364 | 8  | <a href="#">PDB</a> | MOLECULE: CYCLIC AMP-GMP SYNTHASE;                         |
| 616: | <a href="#">4x4n-C</a> | 3.8 | 6.8  | 124 | 436 | 8  | <a href="#">PDB</a> | MOLECULE: CCA-ADDING ENZYME;                               |
| 617: | <a href="#">1n44-A</a> | 3.8 | 9.6  | 94  | 318 | 12 | <a href="#">PDB</a> | MOLECULE: ANNEXIN V;                                       |
| 618: | <a href="#">4evp-A</a> | 3.8 | 4.8  | 116 | 489 | 9  | <a href="#">PDB</a> | MOLECULE: CATENIN BETA-1;                                  |
| 619: | <a href="#">4ev9-A</a> | 3.8 | 4.8  | 116 | 492 | 9  | <a href="#">PDB</a> | MOLECULE: CATENIN BETA-1;                                  |
| 620: | <a href="#">4evt-A</a> | 3.8 | 4.9  | 116 | 490 | 9  | <a href="#">PDB</a> | MOLECULE: CATENIN BETA-1;                                  |
| 621: | <a href="#">4eva-A</a> | 3.8 | 4.8  | 116 | 491 | 9  | <a href="#">PDB</a> | MOLECULE: CATENIN BETA-1;                                  |
| 622: | <a href="#">4ev8-A</a> | 3.8 | 4.9  | 116 | 492 | 9  | <a href="#">PDB</a> | MOLECULE: CATENIN BETA-1;                                  |
| 623: | <a href="#">4eva-C</a> | 3.8 | 4.8  | 116 | 488 | 9  | <a href="#">PDB</a> | MOLECULE: CATENIN BETA-1;                                  |
| 624: | <a href="#">1g3j-C</a> | 3.8 | 5.3  | 104 | 439 | 10 | <a href="#">PDB</a> | MOLECULE: BETA-CATENIN ARMADILLO REPEAT REGION;            |
| 625: | <a href="#">4amq-A</a> | 3.7 | 6.8  | 115 | 341 | 7  | <a href="#">PDB</a> | MOLECULE: L544;                                            |
| 626: | <a href="#">3ovs-B</a> | 3.7 | 6.4  | 120 | 437 | 8  | <a href="#">PDB</a> | MOLECULE: CCA-ADDING ENZYME;                               |
| 627: | <a href="#">4x4u-F</a> | 3.7 | 6.7  | 119 | 436 | 8  | <a href="#">PDB</a> | MOLECULE: CCA-ADDING ENZYME;                               |
| 628: | <a href="#">4x4u-A</a> | 3.7 | 6.8  | 123 | 435 | 8  | <a href="#">PDB</a> | MOLECULE: CCA-ADDING ENZYME;                               |
| 629: | <a href="#">1kdh-A</a> | 3.7 | 4.5  | 130 | 356 | 8  | <a href="#">PDB</a> | MOLECULE: TERMINAL DEOXYNUCLEOTIDYLTRANSFERASE SHORT       |
| 630: | <a href="#">5jnb-A</a> | 3.6 | 4.3  | 129 | 329 | 8  | <a href="#">PDB</a> | MOLECULE: POLY(A) RNA POLYMERASE GLD-2;                    |
| 631: | <a href="#">4xj3-A</a> | 3.6 | 7.1  | 129 | 369 | 5  | <a href="#">PDB</a> | MOLECULE: CYCLIC AMP-GMP SYNTHASE;                         |
| 632: | <a href="#">4wcv-C</a> | 3.6 | 3.8  | 91  | 117 | 9  | <a href="#">PDB</a> | MOLECULE: RIBOSOMAL SILENCING FACTOR RSFS;                 |
| 633: | <a href="#">1px5-B</a> | 3.6 | 9.0  | 131 | 341 | 11 | <a href="#">PDB</a> | MOLECULE: 2'-5'-OLIGOADENYLATE SYNTHETASE 1;               |
| 634: | <a href="#">4x4n-F</a> | 3.6 | 6.7  | 118 | 437 | 8  | <a href="#">PDB</a> | MOLECULE: CCA-ADDING ENZYME;                               |
| 635: | <a href="#">4x4s-C</a> | 3.6 | 6.8  | 123 | 437 | 7  | <a href="#">PDB</a> | MOLECULE: CCA-ADDING ENZYME;                               |
| 636: | <a href="#">4yj1-C</a> | 3.6 | 3.7  | 87  | 338 | 3  | <a href="#">PDB</a> | MOLECULE: ADENOMATOUS POLYPOSIS COLI PROTEIN;              |
| 637: | <a href="#">5eog-F</a> | 3.5 | 5.6  | 115 | 330 | 7  | <a href="#">PDB</a> | MOLECULE: PROTEIN MAB-21-LIKE 1;                           |
| 638: | <a href="#">1miv-A</a> | 3.5 | 4.0  | 117 | 395 | 6  | <a href="#">PDB</a> | MOLECULE: TRNA CCA-ADDING ENZYME;                          |
| 639: | <a href="#">2q0c-B</a> | 3.5 | 8.0  | 117 | 311 | 10 | <a href="#">PDB</a> | MOLECULE: RNA URIDYLYL TRANSFERASE;                        |
| 640: | <a href="#">2pbe-A</a> | 3.5 | 8.8  | 118 | 263 | 8  | <a href="#">PDB</a> | MOLECULE: AMINOGLYCOSIDE 6-ADENYLYLTRANSFERASE;            |
| 641: | <a href="#">4s3n-A</a> | 3.5 | 5.3  | 126 | 343 | 9  | <a href="#">PDB</a> | MOLECULE: 2'-5'-OLIGOADENYLATE SYNTHASE 3;                 |
| 642: | <a href="#">3nmx-B</a> | 3.5 | 5.2  | 128 | 325 | 5  | <a href="#">PDB</a> | MOLECULE: APC VARIANT PROTEIN;                             |
| 643: | <a href="#">3nmz-A</a> | 3.5 | 4.9  | 122 | 406 | 7  | <a href="#">PDB</a> | MOLECULE: APC VARIANT PROTEIN;                             |
| 644: | <a href="#">4atb-D</a> | 3.4 | 7.3  | 137 | 306 | 9  | <a href="#">PDB</a> | MOLECULE: INTERLEUKIN ENHANCER-BINDING FACTOR 2;           |
| 645: | <a href="#">4x4u-E</a> | 3.4 | 6.8  | 124 | 437 | 8  | <a href="#">PDB</a> | MOLECULE: CCA-ADDING ENZYME;                               |
| 646: | <a href="#">4x4t-E</a> | 3.4 | 6.9  | 123 | 437 | 7  | <a href="#">PDB</a> | MOLECULE: CCA-ADDING ENZYME;                               |
| 647: | <a href="#">4x4n-A</a> | 3.4 | 6.8  | 117 | 436 | 8  | <a href="#">PDB</a> | MOLECULE: CCA-ADDING ENZYME;                               |
| 648: | <a href="#">4x4o-C</a> | 3.4 | 6.9  | 118 | 442 | 8  | <a href="#">PDB</a> | MOLECULE: CCA-ADDING ENZYME;                               |
| 649: | <a href="#">4x4p-A</a> | 3.4 | 7.1  | 119 | 437 | 8  | <a href="#">PDB</a> | MOLECULE: CCA-ADDING ENZYME;                               |
| 650: | <a href="#">4evf-A</a> | 3.3 | 4.2  | 106 | 294 | 4  | <a href="#">PDB</a> | MOLECULE: GIARDIN SUBUNIT ALPHA-1;                         |
| 651: | <a href="#">4txa-A</a> | 3.3 | 5.2  | 76  | 367 | 12 | <a href="#">PDB</a> | MOLECULE: ROQUIN-1;                                        |
| 652: | <a href="#">4at9-B</a> | 3.3 | 7.9  | 129 | 308 | 10 | <a href="#">PDB</a> | MOLECULE: INTERLEUKIN ENHANCER-BINDING FACTOR 2;           |
| 653: | <a href="#">4r11-C</a> | 3.3 | 4.9  | 118 | 536 | 9  | <a href="#">PDB</a> | MOLECULE: PROTEIN HUMPBACK-2;                              |
| 654: | <a href="#">5jnb-C</a> | 3.2 | 8.5  | 120 | 289 | 9  | <a href="#">PDB</a> | MOLECULE: POLY(A) RNA POLYMERASE GLD-2;                    |
| 655: | <a href="#">4ams-A</a> | 3.2 | 5.3  | 114 | 367 | 5  | <a href="#">PDB</a> | MOLECULE: MG662;                                           |
| 656: | <a href="#">1axn-A</a> | 3.2 | 5.0  | 91  | 323 | 5  | <a href="#">PDB</a> | MOLECULE: ANNEXIN III;                                     |
| 657: | <a href="#">2nrk-A</a> | 3.2 | 6.3  | 93  | 165 | 14 | <a href="#">PDB</a> | MOLECULE: HYPOTHETICAL PROTEIN GRPB;                       |
| 658: | <a href="#">4ud4-A</a> | 3.2 | 9.0  | 129 | 324 | 6  | <a href="#">PDB</a> | MOLECULE: POLY(A) RNA POLYMERASE PROTEIN CID1;             |
| 659: | <a href="#">4xj6-A</a> | 3.1 | 7.3  | 136 | 370 | 7  | <a href="#">PDB</a> | MOLECULE: VCO179-LIKE PROTEIN;                             |
| 660: | <a href="#">2zoc-A</a> | 3.1 | 5.4  | 88  | 319 | 11 | <a href="#">PDB</a> | MOLECULE: ANNEXIN A4;                                      |
| 661: | <a href="#">4z31-B</a> | 3.1 | 3.7  | 67  | 295 | 10 | <a href="#">PDB</a> | MOLECULE: ROQUIN-2;                                        |
| 662: | <a href="#">4rwq-B</a> | 3.1 | 5.1  | 126 | 346 | 9  | <a href="#">PDB</a> | MOLECULE: 2'-5'-OLIGOADENYLATE SYNTHASE 1;                 |
| 663: | <a href="#">4x4v-C</a> | 3.1 | 6.9  | 118 | 431 | 8  | <a href="#">PDB</a> | MOLECULE: CCA-ADDING ENZYME;                               |
| 664: | <a href="#">3wfg-H</a> | 3.0 | 3.6  | 113 | 441 | 10 | <a href="#">PDB</a> | MOLECULE: RNA (73-MER);                                    |
| 665: | <a href="#">3m62-A</a> | 3.0 | 4.6  | 146 | 955 | 7  | <a href="#">PDB</a> | MOLECULE: UBIQUITIN CONJUGATION FACTOR E4;                 |
| 666: | <a href="#">2h0k-A</a> | 3.0 | 4.5  | 100 | 318 | 11 | <a href="#">PDB</a> | MOLECULE: ANNEXIN A5;                                      |
| 667: | <a href="#">1ycn-A</a> | 3.0 | 12.2 | 93  | 312 | 11 | <a href="#">PDB</a> | MOLECULE: PUTATIVE CA2+-DEPENDENT MEMBRANE-BINDING PROTEIN |
| 668: | <a href="#">3jyy-B</a> | 3.0 | 4.7  | 114 | 266 | 4  | <a href="#">PDB</a> | MOLECULE: LINCOSAMIDE NUCLEOTIDYLTRANSFERASE;              |
| 669: | <a href="#">4rwq-A</a> | 3.0 | 5.1  | 125 | 346 | 10 | <a href="#">PDB</a> | MOLECULE: 2'-5'-OLIGOADENYLATE SYNTHASE 1;                 |

|                          |      |                        |     |      |     |     |    |                     |                                                             |
|--------------------------|------|------------------------|-----|------|-----|-----|----|---------------------|-------------------------------------------------------------|
| <input type="checkbox"/> | 670: | <a href="#">3zym-C</a> | 3.0 | 10.9 | 104 | 280 | 9  | <a href="#">PDB</a> | MOLECULE: PHOSPHATIDYLINOSITOL-BINDING CLATHRIN ASSEMBLY PR |
| <input type="checkbox"/> | 671: | <a href="#">1ylu-A</a> | 3.0 | 5.9  | 85  | 544 | 14 | <a href="#">PDB</a> | MOLECULE: SIGNAL TRANSDUCER AND ACTIVATOR OF TRANSCRIPTION  |
| <input type="checkbox"/> | 672: | <a href="#">5tgg-A</a> | 2.9 | 4.5  | 99  | 226 | 2  | <a href="#">PDB</a> | MOLECULE: R. SWAI PROTEIN;                                  |
| <input type="checkbox"/> | 673: | <a href="#">4x4w-A</a> | 2.9 | 5.0  | 106 | 398 | 11 | <a href="#">PDB</a> | MOLECULE: CCA TRNA NUCLEOTIDYLTRANSFERASE 1, MITOCHONDRIAL; |
| <input type="checkbox"/> | 674: | <a href="#">4ebj-A</a> | 2.9 | 4.1  | 98  | 258 | 7  | <a href="#">PDB</a> | MOLECULE: AMINOGLYCOSIDE NUCLEOTIDYLTRANSFERASE;            |
| <input type="checkbox"/> | 675: | <a href="#">1aei-A</a> | 2.9 | 4.5  | 101 | 315 | 13 | <a href="#">PDB</a> | MOLECULE: ANNEXIN XII;                                      |
| <input type="checkbox"/> | 676: | <a href="#">2zw6-A</a> | 2.9 | 3.4  | 69  | 297 | 13 | <a href="#">PDB</a> | MOLECULE: BLEOMYCIN ACETYLTRANSFERASE;                      |
| <input type="checkbox"/> | 677: | <a href="#">3tjz-B</a> | 2.9 | 3.2  | 68  | 264 | 9  | <a href="#">PDB</a> | MOLECULE: ADP-RIBOSYLATION FACTOR 1;                        |
| <input type="checkbox"/> | 678: | <a href="#">3ov7-B</a> | 2.9 | 8.2  | 119 | 437 | 8  | <a href="#">PDB</a> | MOLECULE: CCA-ADDING ENZYME;                                |
| <input type="checkbox"/> | 679: | <a href="#">2ia7-A</a> | 2.9 | 4.1  | 85  | 111 | 12 | <a href="#">PDB</a> | MOLECULE: TAIL LYSOZYME, PUTATIVE;                          |
| <input type="checkbox"/> | 680: | <a href="#">3hvp-A</a> | 2.9 | 5.3  | 93  | 297 | 3  | <a href="#">PDB</a> | MOLECULE: CATECHOL 2,3-DIOXYGENASE;                         |
| <input type="checkbox"/> | 681: | <a href="#">2iic-A</a> | 2.9 | 9.3  | 95  | 302 | 7  | <a href="#">PDB</a> | MOLECULE: ALPHA-11 GIARDIN;                                 |
| <input type="checkbox"/> | 682: | <a href="#">2iic-B</a> | 2.9 | 9.3  | 95  | 302 | 7  | <a href="#">PDB</a> | MOLECULE: ALPHA-11 GIARDIN;                                 |
| <input type="checkbox"/> | 683: | <a href="#">2iic-C</a> | 2.9 | 9.3  | 96  | 302 | 7  | <a href="#">PDB</a> | MOLECULE: ALPHA-11 GIARDIN;                                 |
| <input type="checkbox"/> | 684: | <a href="#">2w3c-A</a> | 2.9 | 4.1  | 114 | 551 | 7  | <a href="#">PDB</a> | MOLECULE: GENERAL VESICULAR TRANSPORT FACTOR P115;          |
| <input type="checkbox"/> | 685: | <a href="#">2iic-D</a> | 2.9 | 9.3  | 96  | 302 | 7  | <a href="#">PDB</a> | MOLECULE: ALPHA-11 GIARDIN;                                 |
| <input type="checkbox"/> | 686: | <a href="#">4u03-A</a> | 2.8 | 6.8  | 131 | 390 | 8  | <a href="#">PDB</a> | MOLECULE: CYCLIC AMP-GMP SYNTHASE;                          |
| <input type="checkbox"/> | 687: | <a href="#">4kf8-B</a> | 2.8 | 4.6  | 101 | 258 | 11 | <a href="#">PDB</a> | MOLECULE: NUP188;                                           |
| <input type="checkbox"/> | 688: | <a href="#">1n00-A</a> | 2.8 | 12.1 | 87  | 318 | 11 | <a href="#">PDB</a> | MOLECULE: ANNEXIN GH1;                                      |
| <input type="checkbox"/> | 689: | <a href="#">3qml-D</a> | 2.8 | 4.4  | 85  | 273 | 7  | <a href="#">PDB</a> | MOLECULE: 78 KDA GLUCOSE-REGULATED PROTEIN HOMOLOG;         |
| <input type="checkbox"/> | 690: | <a href="#">3ovb-B</a> | 2.8 | 6.5  | 116 | 437 | 9  | <a href="#">PDB</a> | MOLECULE: CCA-ADDING ENZYME;                                |
| <input type="checkbox"/> | 691: | <a href="#">2b51-A</a> | 2.8 | 8.5  | 127 | 444 | 9  | <a href="#">PDB</a> | MOLECULE: RNA EDITING COMPLEX PROTEIN MP57;                 |
| <input type="checkbox"/> | 692: | <a href="#">4dvg-B</a> | 2.7 | 3.9  | 82  | 305 | 10 | <a href="#">PDB</a> | MOLECULE: RHO-LIKE SMALL GTPASE;                            |
| <input type="checkbox"/> | 693: | <a href="#">3ovb-A</a> | 2.7 | 6.5  | 116 | 441 | 9  | <a href="#">PDB</a> | MOLECULE: CCA-ADDING ENZYME;                                |
| <input type="checkbox"/> | 694: | <a href="#">3evh-A</a> | 2.7 | 7.0  | 97  | 353 | 10 | <a href="#">PDB</a> | MOLECULE: ALGINATE LYASE;                                   |
| <input type="checkbox"/> | 695: | <a href="#">5hc9-A</a> | 2.6 | 5.2  | 118 | 425 | 8  | <a href="#">PDB</a> | MOLECULE: TRNA NUCLEOTIDYL TRANSFERASE-RELATED PROTEIN;     |
| <input type="checkbox"/> | 696: | <a href="#">3gq2-A</a> | 2.6 | 5.9  | 106 | 614 | 9  | <a href="#">PDB</a> | MOLECULE: GENERAL VESICULAR TRANSPORT FACTOR P115;          |
| <input type="checkbox"/> | 697: | <a href="#">3hm0-A</a> | 2.6 | 4.3  | 72  | 126 | 6  | <a href="#">PDB</a> | MOLECULE: PROBABLE THIOESTERASE;                            |
| <input type="checkbox"/> | 698: | <a href="#">3bg3-A</a> | 2.6 | 9.2  | 83  | 680 | 6  | <a href="#">PDB</a> | MOLECULE: PYRUVATE CARBOXYLASE, MITOCHONDRIAL;              |
| <input type="checkbox"/> | 699: | <a href="#">2pbi-A</a> | 2.6 | 5.9  | 84  | 415 | 5  | <a href="#">PDB</a> | MOLECULE: REGULATOR OF G-PROTEIN SIGNALING 9;               |
| <input type="checkbox"/> | 700: | <a href="#">4mdu-B</a> | 2.6 | 8.3  | 73  | 360 | 7  | <a href="#">PDB</a> | MOLECULE: ANNEXIN;                                          |
| <input type="checkbox"/> | 701: | <a href="#">3n0f-A</a> | 2.6 | 14.5 | 80  | 531 | 5  | <a href="#">PDB</a> | MOLECULE: ISOPRENE SYNTHASE;                                |
| <input type="checkbox"/> | 702: | <a href="#">3p3q-B</a> | 2.6 | 4.4  | 58  | 253 | 9  | <a href="#">PDB</a> | MOLECULE: MMOQ;                                             |
| <input type="checkbox"/> | 703: | <a href="#">3rtr-C</a> | 2.6 | 3.3  | 58  | 317 | 7  | <a href="#">PDB</a> | MOLECULE: CULLIN-1;                                         |
| <input type="checkbox"/> | 704: | <a href="#">1bgl-A</a> | 2.6 | 6.0  | 83  | 559 | 7  | <a href="#">PDB</a> | MOLECULE: PROTEIN (TRANSCRIPTION FACTOR STAT3B);            |
| <input type="checkbox"/> | 705: | <a href="#">2o5a-A</a> | 2.6 | 4.2  | 82  | 108 | 5  | <a href="#">PDB</a> | MOLECULE: BH1328 PROTEIN;                                   |
| <input type="checkbox"/> | 706: | <a href="#">3inn-C</a> | 2.6 | 5.1  | 71  | 284 | 8  | <a href="#">PDB</a> | MOLECULE: PANTOTHENATE SYNTHETASE;                          |
| <input type="checkbox"/> | 707: | <a href="#">3ebb-C</a> | 2.6 | 5.3  | 110 | 265 | 8  | <a href="#">PDB</a> | MOLECULE: PHOSPHOLIPASE A2-ACTIVATING PROTEIN;              |
| <input type="checkbox"/> | 708: | <a href="#">3pql-A</a> | 2.5 | 6.9  | 113 | 355 | 10 | <a href="#">PDB</a> | MOLECULE: POLY(A) RNA POLYMERASE;                           |
| <input type="checkbox"/> | 709: | <a href="#">1hm6-A</a> | 2.5 | 3.8  | 90  | 343 | 7  | <a href="#">PDB</a> | MOLECULE: ANNEXIN 1;                                        |
| <input type="checkbox"/> | 710: | <a href="#">4bwr-A</a> | 2.5 | 10.7 | 99  | 467 | 8  | <a href="#">PDB</a> | MOLECULE: PROTEIN CORRESPONDING TO LOCUS C5321 FROM CFT073  |
| <input type="checkbox"/> | 711: | <a href="#">3jui-A</a> | 2.5 | 4.4  | 72  | 174 | 3  | <a href="#">PDB</a> | MOLECULE: TRANSLATION INITIATION FACTOR EIF-2B SUBUNIT EPSI |
| <input type="checkbox"/> | 712: | <a href="#">417m-A</a> | 2.5 | 4.0  | 85  | 261 | 9  | <a href="#">PDB</a> | MOLECULE: PUTATIVE UNCHARACTERIZED PROTEIN;                 |
| <input type="checkbox"/> | 713: | <a href="#">5byu-A</a> | 2.5 | 3.7  | 70  | 128 | 6  | <a href="#">PDB</a> | MOLECULE: THIOESTERASE;                                     |
| <input type="checkbox"/> | 714: | <a href="#">1yv1-B</a> | 2.5 | 11.3 | 89  | 653 | 8  | <a href="#">PDB</a> | MOLECULE: SIGNAL TRANSDUCER AND ACTIVATOR OF TRANSCRIPTION  |
| <input type="checkbox"/> | 715: | <a href="#">2a4w-A</a> | 2.5 | 3.9  | 79  | 128 | 10 | <a href="#">PDB</a> | MOLECULE: MITOMYCIN-BINDING PROTEIN;                        |
| <input type="checkbox"/> | 716: | <a href="#">5fu7-A</a> | 2.4 | 3.8  | 96  | 519 | 13 | <a href="#">PDB</a> | MOLECULE: CCR4-NOT TRANSCRIPTION COMPLEX SUBUNIT 1;         |
| <input type="checkbox"/> | 717: | <a href="#">5i6e-A</a> | 2.4 | 4.3  | 98  | 687 | 7  | <a href="#">PDB</a> | MOLECULE: ACETYL-COA CARBOXYLASE;                           |
| <input type="checkbox"/> | 718: | <a href="#">3oms-A</a> | 2.4 | 4.0  | 75  | 129 | 5  | <a href="#">PDB</a> | MOLECULE: PHNB PROTEIN;                                     |
| <input type="checkbox"/> | 719: | <a href="#">2i52-F</a> | 2.4 | 4.1  | 75  | 119 | 9  | <a href="#">PDB</a> | MOLECULE: HYPOTHETICAL PROTEIN;                             |
| <input type="checkbox"/> | 720: | <a href="#">1kw2-A</a> | 2.4 | 13.0 | 77  | 455 | 8  | <a href="#">PDB</a> | MOLECULE: VITAMIN D-BINDING PROTEIN;                        |
| <input type="checkbox"/> | 721: | <a href="#">3ct8-A</a> | 2.4 | 4.0  | 72  | 133 | 7  | <a href="#">PDB</a> | MOLECULE: PUTATIVE GLYOXALASE;                              |
| <input type="checkbox"/> | 722: | <a href="#">5dhh-B</a> | 2.4 | 3.9  | 57  | 387 | 7  | <a href="#">PDB</a> | MOLECULE: GPCR-BRIL CHIMERA;                                |
| <input type="checkbox"/> | 723: | <a href="#">4wzs-C</a> | 2.4 | 3.5  | 59  | 722 | 7  | <a href="#">PDB</a> | MOLECULE: ECU11_1470 PROTEIN;                               |
| <input type="checkbox"/> | 724: | <a href="#">3cwg-B</a> | 2.4 | 6.0  | 81  | 507 | 7  | <a href="#">PDB</a> | MOLECULE: SIGNAL TRANSDUCER AND ACTIVATOR OF TRANSCRIPTION  |
| <input type="checkbox"/> | 725: | <a href="#">3ebb-A</a> | 2.4 | 5.2  | 110 | 265 | 9  | <a href="#">PDB</a> | MOLECULE: PHOSPHOLIPASE A2-ACTIVATING PROTEIN;              |
| <input type="checkbox"/> | 726: | <a href="#">3nmw-B</a> | 2.4 | 5.2  | 99  | 331 | 6  | <a href="#">PDB</a> | MOLECULE: APC VARIANT PROTEIN;                              |
| <input type="checkbox"/> | 727: | <a href="#">2q0e-A</a> | 2.3 | 5.1  | 124 | 331 | 10 | <a href="#">PDB</a> | MOLECULE: RNA URIDYLYL TRANSFERASE;                         |
| <input type="checkbox"/> | 728: | <a href="#">2i4g-A</a> | 2.3 | 4.5  | 113 | 289 | 4  | <a href="#">PDB</a> | MOLECULE: RECEPTOR-TYPE TYROSINE-PROTEIN PHOSPHATASE BETA;  |
| <input type="checkbox"/> | 729: | <a href="#">2p25-A</a> | 2.3 | 4.1  | 72  | 126 | 10 | <a href="#">PDB</a> | MOLECULE: GLYOXALASE FAMILY PROTEIN;                        |
| <input type="checkbox"/> | 730: | <a href="#">4o10-B</a> | 2.3 | 3.9  | 75  | 902 | 4  | <a href="#">PDB</a> | MOLECULE: GTP-BINDING NUCLEAR PROTEIN RAN;                  |
| <input type="checkbox"/> | 731: | <a href="#">2kjz-A</a> | 2.3 | 3.5  | 69  | 122 | 4  | <a href="#">PDB</a> | MOLECULE: ATC0852;                                          |
| <input type="checkbox"/> | 732: | <a href="#">2j5c-B</a> | 2.3 | 4.7  | 69  | 491 | 3  | <a href="#">PDB</a> | MOLECULE: 1,8-CINEOLE SYNTHASE;                             |

|                          |                                             |     |      |     |      |    |                     |                                                             |
|--------------------------|---------------------------------------------|-----|------|-----|------|----|---------------------|-------------------------------------------------------------|
| <input type="checkbox"/> | <a href="#">733:</a> <a href="#">3a6p-A</a> | 2.3 | 3.3  | 57  | 1072 | 9  | <a href="#">PDB</a> | MOLECULE: EXPORTIN-5;                                       |
| <input type="checkbox"/> | <a href="#">734:</a> <a href="#">1xm9-A</a> | 2.3 | 3.0  | 62  | 420  | 11 | <a href="#">PDB</a> | MOLECULE: PLAKOPHILIN 1;                                    |
| <input type="checkbox"/> | <a href="#">735:</a> <a href="#">4yc7-B</a> | 2.2 | 6.0  | 117 | 291  | 5  | <a href="#">PDB</a> | MOLECULE: FORMIN-LIKE PROTEIN 2;                            |
| <input type="checkbox"/> | <a href="#">736:</a> <a href="#">1z1w-A</a> | 2.2 | 4.8  | 114 | 780  | 8  | <a href="#">PDB</a> | MOLECULE: TRICORN PROTEASE INTERACTING FACTOR F3;           |
| <input type="checkbox"/> | <a href="#">737:</a> <a href="#">3j2m-A</a> | 2.2 | 4.4  | 93  | 211  | 4  | <a href="#">PDB</a> | MOLECULE: TAIL CONNECTOR PROTEIN GP15;                      |
| <input type="checkbox"/> | <a href="#">738:</a> <a href="#">1s5u-E</a> | 2.2 | 3.8  | 71  | 136  | 6  | <a href="#">PDB</a> | MOLECULE: PROTEIN YBGC;                                     |
| <input type="checkbox"/> | <a href="#">739:</a> <a href="#">3zhp-A</a> | 2.2 | 4.7  | 91  | 315  | 12 | <a href="#">PDB</a> | MOLECULE: CALCIUM-BINDING PROTEIN 39-LIKE;                  |
| <input type="checkbox"/> | <a href="#">740:</a> <a href="#">2mxz-A</a> | 2.2 | 3.4  | 74  | 137  | 7  | <a href="#">PDB</a> | MOLECULE: L-ALANYL-D-GLUTAMATE PEPTIDASE;                   |
| <input type="checkbox"/> | <a href="#">741:</a> <a href="#">1gxb-D</a> | 2.2 | 3.8  | 78  | 345  | 9  | <a href="#">PDB</a> | MOLECULE: ANTHRANILATE PHOSPHORIBOSYLTRANSFERASE;           |
| <input type="checkbox"/> | <a href="#">742:</a> <a href="#">4c00-A</a> | 2.2 | 11.9 | 76  | 544  | 8  | <a href="#">PDB</a> | MOLECULE: TRANSLOCATION AND ASSEMBLY MODULE TAMA;           |
| <input type="checkbox"/> | <a href="#">743:</a> <a href="#">3jbr-A</a> | 2.2 | 15.5 | 95  | 1224 | 4  | <a href="#">PDB</a> | MOLECULE: VOLTAGE-DEPENDENT L-TYPE CALCIUM CHANNEL SUBUNIT  |
| <input type="checkbox"/> | <a href="#">744:</a> <a href="#">5i6x-A</a> | 2.2 | 8.8  | 78  | 544  | 8  | <a href="#">PDB</a> | MOLECULE: SODIUM-DEPENDENT SEROTONIN TRANSPORTER;           |
| <input type="checkbox"/> | <a href="#">745:</a> <a href="#">2wzk-A</a> | 2.2 | 3.2  | 66  | 369  | 6  | <a href="#">PDB</a> | MOLECULE: CULLIN-5;                                         |
| <input type="checkbox"/> | <a href="#">746:</a> <a href="#">4yay-A</a> | 2.2 | 3.6  | 56  | 393  | 7  | <a href="#">PDB</a> | MOLECULE: SOLUBLE CYTOCHROME B562,TYPE-1 ANGIOTENSIN II REC |
| <input type="checkbox"/> | <a href="#">747:</a> <a href="#">2wm9-A</a> | 2.2 | 4.2  | 90  | 407  | 7  | <a href="#">PDB</a> | MOLECULE: DEDICATOR OF CYTOKINESIS PROTEIN 9;               |
| <input type="checkbox"/> | <a href="#">748:</a> <a href="#">4oww-A</a> | 2.2 | 4.9  | 81  | 463  | 5  | <a href="#">PDB</a> | MOLECULE: DNA (5'-D(P*TP*TP*TP*TP*TP*T)-3') ;               |
| <input type="checkbox"/> | <a href="#">749:</a> <a href="#">5i7n-A</a> | 2.1 | 4.4  | 100 | 325  | 9  | <a href="#">PDB</a> | MOLECULE: MAOC-LIKE DEHYDRATASE;                            |
| <input type="checkbox"/> | <a href="#">750:</a> <a href="#">1wa5-B</a> | 2.1 | 4.2  | 107 | 463  | 9  | <a href="#">PDB</a> | MOLECULE: GTP-BINDING NUCLEAR PROTEIN RAN;                  |
| <input type="checkbox"/> | <a href="#">751:</a> <a href="#">4hbd-A</a> | 2.1 | 3.5  | 89  | 245  | 7  | <a href="#">PDB</a> | MOLECULE: KN MOTIF AND ANKYRIN REPEAT DOMAIN-CONTAINING PRO |
| <input type="checkbox"/> | <a href="#">752:</a> <a href="#">4i2w-A</a> | 2.1 | 9.5  | 98  | 904  | 8  | <a href="#">PDB</a> | MOLECULE: PROTEIN UNC-45;                                   |
| <input type="checkbox"/> | <a href="#">753:</a> <a href="#">3q0q-A</a> | 2.1 | 6.0  | 94  | 343  | 9  | <a href="#">PDB</a> | MOLECULE: PUMILIO HOMOLOG 2;                                |
| <input type="checkbox"/> | <a href="#">754:</a> <a href="#">1f7u-A</a> | 2.1 | 9.0  | 92  | 607  | 10 | <a href="#">PDB</a> | MOLECULE: TRNA (ARG) ;                                      |
| <input type="checkbox"/> | <a href="#">755:</a> <a href="#">5emw-A</a> | 2.1 | 3.7  | 82  | 208  | 4  | <a href="#">PDB</a> | MOLECULE: TRANSCRIPTIONAL ENHANCER FACTOR TEF-5;            |
| <input type="checkbox"/> | <a href="#">756:</a> <a href="#">3hbz-A</a> | 2.1 | 4.6  | 102 | 341  | 11 | <a href="#">PDB</a> | MOLECULE: PUTATIVE GLYCOSIDE HYDROLASE;                     |
| <input type="checkbox"/> | <a href="#">757:</a> <a href="#">2hlj-A</a> | 2.1 | 6.8  | 75  | 154  | 5  | <a href="#">PDB</a> | MOLECULE: HYPOTHETICAL PROTEIN;                             |
| <input type="checkbox"/> | <a href="#">758:</a> <a href="#">3b18-A</a> | 2.1 | 3.6  | 69  | 167  | 4  | <a href="#">PDB</a> | MOLECULE: UNCHARACTERIZED PROTEIN RV0098/MT0107;            |
| <input type="checkbox"/> | <a href="#">759:</a> <a href="#">1kgz-B</a> | 2.1 | 3.8  | 77  | 330  | 6  | <a href="#">PDB</a> | MOLECULE: ANTHRANILATE PHOSPHORIBOSYLTRANSFERASE;           |
| <input type="checkbox"/> | <a href="#">760:</a> <a href="#">317t-A</a> | 2.1 | 4.0  | 68  | 133  | 9  | <a href="#">PDB</a> | MOLECULE: PUTATIVE UNCHARACTERIZED PROTEIN;                 |
| <input type="checkbox"/> | <a href="#">761:</a> <a href="#">4tnm-A</a> | 2.1 | 4.9  | 86  | 407  | 5  | <a href="#">PDB</a> | MOLECULE: IMPORTIN SUBUNIT ALPHA;                           |
| <input type="checkbox"/> | <a href="#">762:</a> <a href="#">3s4k-A</a> | 2.1 | 4.6  | 69  | 124  | 10 | <a href="#">PDB</a> | MOLECULE: PUTATIVE ESTERASE RV1847/MT1895;                  |
| <input type="checkbox"/> | <a href="#">763:</a> <a href="#">5dqq-A</a> | 2.1 | 3.4  | 58  | 649  | 7  | <a href="#">PDB</a> | MOLECULE: TWO PORE CALCIUM CHANNEL PROTEIN 1;               |
| <input type="checkbox"/> | <a href="#">764:</a> <a href="#">4n6h-A</a> | 2.1 | 3.1  | 53  | 408  | 4  | <a href="#">PDB</a> | MOLECULE: SOLUBLE CYTOCHROME B562, DELTA-TYPE OPIOID RECEPT |
| <input type="checkbox"/> | <a href="#">765:</a> <a href="#">4fml-A</a> | 2.1 | 3.1  | 53  | 204  | 9  | <a href="#">PDB</a> | MOLECULE: VSDC;                                             |
| <input type="checkbox"/> | <a href="#">766:</a> <a href="#">1g87-B</a> | 2.1 | 3.8  | 86  | 613  | 5  | <a href="#">PDB</a> | MOLECULE: ENDOCELLULASE 9G;                                 |
| <input type="checkbox"/> | <a href="#">767:</a> <a href="#">3chl-A</a> | 2.0 | 5.0  | 116 | 315  | 7  | <a href="#">PDB</a> | MOLECULE: ALPHA-14 GIARDIN;                                 |
| <input type="checkbox"/> | <a href="#">768:</a> <a href="#">3now-A</a> | 2.0 | 5.0  | 102 | 786  | 8  | <a href="#">PDB</a> | MOLECULE: UNC-45 PROTEIN, SD10334P;                         |
| <input type="checkbox"/> | <a href="#">769:</a> <a href="#">3tb5-A</a> | 2.0 | 5.8  | 97  | 254  | 12 | <a href="#">PDB</a> | MOLECULE: METHIONINE AMINOPEPTIDASE;                        |
| <input type="checkbox"/> | <a href="#">770:</a> <a href="#">2opd-A</a> | 2.0 | 3.9  | 69  | 121  | 6  | <a href="#">PDB</a> | MOLECULE: PILX;                                             |
| <input type="checkbox"/> | <a href="#">771:</a> <a href="#">2i7r-A</a> | 2.0 | 4.1  | 69  | 115  | 7  | <a href="#">PDB</a> | MOLECULE: CONSERVED DOMAIN PROTEIN;                         |
| <input type="checkbox"/> | <a href="#">772:</a> <a href="#">3jcm-I</a> | 2.0 | 3.3  | 60  | 416  | 7  | <a href="#">PDB</a> | MOLECULE: PRE-MRNA-SPLICING FACTOR 8;                       |
| <input type="checkbox"/> | <a href="#">773:</a> <a href="#">3nmz-B</a> | 2.0 | 6.7  | 122 | 400  | 7  | <a href="#">PDB</a> | MOLECULE: APC VARIANT PROTEIN;                              |

## Pairwise Structural Alignments

Notation: three-state secondary structure definitions by DSSP (reduced to H=helix, E=sheet, L=coil) are shown above the amino acid sequence. Structurally equivalent residues are in uppercase, structurally non-equivalent residues (e.g. in loops) are in lowercase. Amino acid identities are marked by vertical bars.

No 1: Query=mollA Sbjct=4ok0A Z-score=14.4

[back to top](#)

```
DSSP 1111111111hhhhhhhhhhhhhh11LLHHHHHHHHHHHHHHHHLL1111111LEEEE
Query aapyspntnlrslrdrltqvaerqgVVFGRlQRHVAXIVVAQFAATLtddtgapLLLVK 60
ident | | | | | | | | | | | | | | | | | | | | | | | | | | | |
Sbjct -----LSEQALNHEKLMRAIVKNLADT-----PMVLK 27
DSSP -----LLHHHHHHHHHHHHHHHHHHHHLL-----LLEEL
```

```
DSSP HHHHHHHHHH11LLLLLLEEEEEELLHhHHHHHHHHHHhh1LLLE-eeEELLLEEL111
Query GGSSLELRRGipDSRSTKDFATVARRDIeLIHEQLADAGetgWEGF-taIFTAPEEiaap 119
ident | | | | | | | | | | | | | | | | | | | | | | |
```

Sbjct GETALYLYGY--LNRFSEDLDFDCHKKI-NLLGRVKSAT---PNGIInDIHIKKDT--- 78  
DSSP HHHHHHHHLL--LLLLLLEEEELLLL-LHHHHHHHHL---LLEEEeEEEEEEEL---

DSSP 111LLEEEEEEEEEEL-1EEEEEEEEEEELL11LLL--LEEEe1h1111111eEE  
Query gxpVKPRRFTAkLSYR-grAFATVPIEVSSVEagNADQ--FDTLTsdalglvgvpaavAV 176  
ident | | | | | | | | | | | |  
Sbjct ---DSVGRYMRVYATKdnKEEQTLKLEISYRD--APKESevNVIE-----GM 120  
DSSP ---LLEEEEEEEEEEL11LLEEEEEEEELL--LLLHhHEEEEL-----LE

DSSP EELLLLLLLLLLLLLLLL1111LLLHLLLLLLLLLLLL--HLLHhHLLLLLLLLLLLLLLL 235  
Query PCXTIPWQIAQKLHAVTAVLeepkaNDRAHDLVDLQLE-GLLLdadLXPTRsaciaife  
ident | | | | | | | | | | | | | | | | |  
Sbjct RIAKIERIIDNKLCACFDGE---htRTKARDLFDLHFLakHYEE-hfNLDLA----- 168  
DSSP EEEELLLLLLLLLLLLLLLL---111LHLLLLLLLLLLLLLLLHhHhHhHHL-----

DSSP hh111111LLL---11LHLLLLLLLLLLLL--HLL1111111LHLLLLLLLLLLLLLLLLL 288  
Query araqhpwPPRV----aTLPHWPLIYAGA--LEGLdhle1aRTVDAQAQAVQRFVARIDR-  
ident | | | | | | | | | | | | | | | | |  
Sbjct ----sr1KDFSkdPdKLVSDYLVVKLda1LNQI-----MDLEETALELGVAQLIHKK 218  
DSSP ----hhHHHh11hhHHHHHHHHHHHL11LLL-----LHLLLLLLLLLLLLLLLLL

DSSP LLL---  
Query ATKR--- 292  
ident |  
Sbjct LEKLehh 225  
DSSP HHL111

No 2: Query=mol1A Sbjct=4ok0B Z-score=14.4

[back to top](#)

DSSP 111111111h111111111LHLLLLLLLLLLLLLLLLL111111111LEEEE 60  
Query aapyssptnlrslrdrtlqvaerqgVVFGRQLRHVAXIVVAQFAATLlddtgapLLLVK  
ident | | | | | | | | | | | | | | | | | | | | | | | | | | | |  
Sbjct -----LSEQALNHEKLMRAIVKNLADT-----PMVLK 27  
DSSP -----LHLLLLLLLLLLLLLLLLL-----LLEEL

DSSP HHHHHHHHLL11LHLLLLLLEEEELLLLhHHHHHHHHHHHh1LLEEE-EELLEEL111 119  
Query GGSSLELRRGipDSRTSKDFATVARRDIeLIHEQLADAGetgWEGFTA-IFTAPEEiaap  
ident | | | | | | | | | | | | | | | | | | | | | | | | | | | | | | | | | | | | | | | | |  
Sbjct GETALYLYGY--LNRFSEDLDFDCHKKI-NLLGRVKSAT---PNGIInDIHIKKDT--- 78  
DSSP HHHHHHHHLL--LLLLLLEEEELLLL-LHHHHHHHHL---LLEEEeEEEEEEEL---

DSSP 111LLEEEEEEEEEEL-1EEEEEEEEEEELL11LLL--LEEEe1h1111111eEE 176  
Query gxpVKPRRFTAkLSYR-grAFATVPIEVSSVEagNADQ--FDTLTsdalglvgvpaavAV  
ident | | | | | | | | | | | | | | | | | | | | | | | |  
Sbjct ---DSVGRYMRVYATKdnKEEQTLKLEISYRD--APKESevNVIE-----GM 120  
DSSP ---LLEEEEEEEEEEL1eEEEEEEEEEEELL--LLLHhHEEEEL-----LE

DSSP EELLLLLLLLLLLLLLLL1111LLLHLLLLLLLLLLLL--HLLHhHLLLLLLLLLLLLLLL 235  
Query PCXTIPWQIAQKLHAVTAVLeepkaNDRAHDLVDLQLE-GLLLDaLXPTRsaciaife  
ident | | | | | | | | | | | | | | | | | | | | | | | | | | | | | | | | | | | | | | | | |  
Sbjct RIAKIERIIDNKLCACFDGE---htRTKARDLFDLHFLakHYEEH-FNLDLA----- 168  
DSSP EEEELLLLLLLLLLLLLLLL---11LHLLLLLLLLLLLLLLLHhHhHhHHL-----

DSSP hh111111LLL---LHLLLLLLLLLLLL--HLL1111111LHLLLLLLLLLLLLLLLLL 288  
Query araqhpwPPRV----ATLPHWPLIYAGA--LEGLdhle1aRTVDAQAQAVQRFVARIDR-  
ident | | | | | | | | | | | | | | | | | | | | | | | | | | | | | | | | | | | | | | | | |  
Sbjct ----sr1KDFSkdPdKLVSDYLVVKLda1LNQI-----MDLEETALELGVAQLIHKK 218  
DSSP ----hhHHHh11hhHHHHHHHHHHHL11LLL-----LHLLLLLLLLLLLLLLLLL

DSSP LLL-----  
Query ATKR----- 292  
ident |  
Sbjct LEKLehhh 227  
DSSP HHHh111







```

DSSP  EHHHHHHHHhLLL--LLLLLLEEEEEEEhHHHHHHHHHHHL-----LLEEEELL

DSSP  111111LLEEEEEeeellleeeEEEEEEEL-----1LLLLL-LEEEEELh
Query  apgxpvKPRRFtAKlsyrgrafaTVPIEVSS-----eAGNADQ-FDTLTSDa 164
ident  |
Sbjct  -----YGFLAEIG-----DELLDCEPAwwadeayeiaeapQGSCPEaAEGVIAG- 116
DSSP  -----LLEEEEL-----LEEEEEEEeeellleee1111LLLLL1LLEELL-

DSSP  hhh11111EEEEELLHHHHHHHHHHHL111111LLLLHHHHHHHHHHHLHHHHH
Query  lglvgpaaVAVPCXTIPWQIAQKLHAVTAVleepkaNDRAHDLVDLQLEGLLDADLX 224
ident  | | | | |
Sbjct  -----RPVRCNSWEAIWDFYFYADEV---ppvDWPTKHIESYRLACTSLGAEKVE 164
DSSP  -----EEELLLLHHHHHHHHHHHL---1hhHLLHHHHHHHHHHHLHHHHH

DSSP  HHHhhhhhhhh11LLLL111111hhhhhhhh11111111hhhhhhhhhh
Query  PTRSaciaifearaqHPWPprvatlphwpliyagaleglhdhlelartvdaaaqavqrfva 284
ident  |
Sbjct  VLRA-----afRSRY----- 174
DSSP  HHH-----hhHHH-----

DSSP  hhh1111
Query  ridratkr 292
ident
Sbjct  -----aa 176
DSSP  -----11

```

No 7: Query=mol1A Sbjct=4xjeA Z-score=11.1

[back to top](#)

```

DSSP  11111111hhhhhhhhhh1111hhhhHHHHHHHHHH-LLLL1111LLEEE
Query  aapyspntnlrslrdrltqvaerqgvfgrlqrHVAXIVVAQFAA-TLTDdtGAPLLLV 59
ident  |
Sbjct  -----DTTQVTLIHKILaAADE--RNLPLWI 24
DSSP  -----LHHHHHHHHHHHHHHH--LLLLLEE

DSSP  EHHHHHHHHLL11LLLLLLEEEEL-LHHHHHHHHHHhh1111eeEELLEELI
Query  KGSSELELRRIpdSRTSKDFATVARR-DIELIHEQLADAgewgftaIFTAPEEIIa 118
ident  || | | | |
Sbjct  GGGWAIDARLGR-vTRKHDDIDLTFPGeRRGELEAIVEML-----GGRVMEELD- 72
DSSP  EHHHHHHHHHL-1LLLLLLEEEEEhHHHHHHHHHHL-----LLEEEELL-

DSSP  11111LLEEEEEeeellleeeEEEEEE-----LLL-----LLL-LEEEELhh
Query  pgxpvKPRRFtAKlsyrgrafaTVPIEVSS-----VEAG----NADQ-fDTLTSDa1 165
ident  |
Sbjct  -----YGFLAEIG-----DELLDCEPAwwadeayeIAEapqgSCPEaaEGVIAG-- 116
DSSP  -----LLEEEEL-----LEEEEEEEee1111eEELL1111LLLL1LEELL--

DSSP  hhh11111EEEEELLHHHHHHHHHHHL111111LLLLHHHHHHHHHHHLHHHHH
Query  glvgpaaVAVPCXTIPWQIAQKLHAVTAVleepkaNDRAHDLVDLQLEGLLDADLXP 225
ident  | | | | |
Sbjct  -----RPVRCNSWEAIWDFYFYADEV---ppVDWPTKHIESYRLACTSLGAEKVEV 165
DSSP  -----EEELLLLHHHHHHHHHHHL---1hhHLLHHHHHHHHHHHLHHHHH

DSSP  HHHhhhhhhhh11LLLL111111hhhhhhhh11111111hhhhhhhhhh
Query  TRSaciaifearaqHPWPprvatlphwpliyagaleglhdhlelartvdaaaqavqrfvar 285
ident  |
Sbjct  LRA-----afRSRY----- 174
DSSP  HHH-----hhHHH-----

DSSP  hhh1111
Query  idratkr 292
ident
Sbjct  -----a 175
DSSP  -----1

```



DSSP Hhhhhhhhhh111LLL111111hhhhhhhh11111111hhhhhhhhhhhhhhhh  
 Query SaciaifearaqhPWPPrvatlphwplyagalegldhlelartvdaaaqavqrfvarid 287  
 ident  
 Sbjct A-----afRSRYA----- 174  
 DSSP H-----hhhHHL-----

DSSP h1111  
 Query ratkr 292  
 ident  
 Sbjct ----a 175  
 DSSP ----l

No 10: Query=mol1A Sbjct=4e8jB Z-score=9.6

[back to top](#)

DSSP 11111111hhhhhhhhhhhhhh111hhhhHHHHHHHHHHHHHHLLL1111LLEEEE  
 Query aapyssptnlrsldrldlqvaerqgvfgRlqRHVAXIVVAQFAATLTddtgaPllLVK 60  
 ident  
 Sbjct -----nnvTEKELFYILDLEFHXK----VTYWLD 25  
 DSSP -----111LHHHHHHHHHHHHHL----LLEEEE

DSSP HHHHHHHHLL1LLLLLEEEEL-LHHHHHHHHhhhh111leeEELLEEL111  
 Query GGSSLELRRGIpDSRTSKDFATVARR-DIELIHEQLAdagetgwegftAIFTAPEElaap 119  
 ident || | | |  
 Sbjct GGWGVdVLtGK-QQREHRDIDIDfDAqHTQKVIQKLED-----IGYKIEVHW--- 71  
 DSSP HHHHHHHHLL-LLLLEEEEEEhHHHHHHHHHH-----LLEEEEEE---

DSSP 111LLEEEEEEeellleeEEEEEEEL-----LLL1LLEEEEEE  
 Query gxpVKPRRFTAKlsyrgrafATVPIEVSSV-----EAGNaDQFDLTLS 162  
 ident | |  
 Sbjct --xPSRXELKHE-----EYGYLDIHPInlnddgsitqanpeggnYVfQnDWFSETNY 121  
 DSSP --1LLEEEEEEEL-----LLEEEEEEeell111leeel111leEELLhHHEEEEEE

DSSP Lhhhh1111LLEEEELLHHHHHHHHhHHL11111111LHHHHHHHHHHH1h hh  
 Query DalglvgvpaAVAVPCXTIPWQIAQKlhAVTAvleepkandRAHDLVDLQLEGL1ldad 222  
 ident || | | |  
 Sbjct K-----DRKIPCISKEAQLLFH--SGYD-----1TETDHFdIKNLKSI----- 157  
 DSSP L-----LLEEEELLHHHHHHHL--LLL-----1LHHHHHHHHHHHL-----

DSSP hhhhhhhhhhhhh11111111111hhhhhhhh1111111111hhhhhhhhhh  
 Query lxptrsaciaifearaqhpwprvatlphwplyagalegldhlelartvdaaaqavqrf 282  
 ident  
 Sbjct ----- 157  
 DSSP -----

DSSP hhhhh1111  
 Query varidratkr 292  
 ident  
 Sbjct -----t 158  
 DSSP -----l

No 11: Query=mol1A Sbjct=2ewrA Z-score=9.5

[back to top](#)

DSSP 11111111hhhhhhhhhhhh111hhHHHHHHHHHHHHHHLLL1111LLEEEE  
 Query aapyssptnlrsldrldlqvaerqgvfgRlQrHVAXIVVAQFAATLTddtgaPllLVK 60  
 ident | |  
 Sbjct -----iRPEYLRVLRKIYDRLKNEK-----VNwVVT 26  
 DSSP -----1LHHHHHHHHHHHHLLL----LLEEEE

DSSP HHHHHHHH1111LLLEEEELL-HHHHHHHhhhh111leeEELLE-ELL  
 Query GGSSLELRRGipDSRTSKDFATVARRD-IELIHEQLAdagetgwegftAIFTAPE-EIAA 118  
 ident | | | | |  
 Sbjct GSLSFALQG--vPVEVHDIDIQTDEEGAYEIERIFS-----EFVSKKvRFSS 71



DSSP HHHHHHLL---LLLLLLEEEEEELHhHHHHHHHLH-----HHEEEeEEEE

DSSP L-LLLLLLEEEEEeellleeEEEEEEEEEL-----LLL-LLEEEEEELhh  
Query P-GXPVKPRRFTAKlsyrgrafATVPIEVSSVE-----AGNA-DQFDTLTSDal 165  
ident |  
Sbjct TeKICSHFGELII-----DGIKVEIXGDIrkrledgtwedPVDLnKYKRFVETH-- 120  
DSSP L1LEEEEEEEEE-----LLEEEEEEEEEe11111111LLLHhHEEEEEEL---

DSSP hh11111LEEEEEELHHHHHHHHHHHh1111111111hHHHHHHHHHLLHHHhh  
Query glvgvpaAVAVPCXTIPWQIAQKLHAVtavleepkandrahDLVDLQLEGLLLDADlxp 225  
ident | | | | |  
Sbjct -----GXKIPVLSLEYEYQAYLKL-----RVEKAETLRKWLNERK--- 156  
DSSP -----LEEEEEELHHHHHHHHHHL-----LHHHHHHHHHHHLL---

DSSP hhhhhhhhhhh11111111111hhhhhhhh1111111111hhhhhhhhhhhh  
Query trsaciaifearaqhpwrvtlphwpliyagalegldhlelartvdaaaqavqrfrvar 285  
ident  
Sbjct ----- 156  
DSSP -----

DSSP hhh1111  
Query idratkr 292  
ident  
Sbjct ----- 156  
DSSP -----

No 12: Query=mol1A Sbjct=2fc1A Z-score=9.4

[back to top](#)

DSSP 111111111hhhhhhhhhh1111hhHHHHHHHHHHHLL11111LEEEEE  
Query aapyspntnlrslrdrltqvaerqgvfgRLQRHVAXIVVAQFAATLTddtgaPLLVK 60  
ident | | | | |  
Sbjct -----mirPEYLRVLRXIYDRLXNEX-----VNWVVT 27  
DSSP -----11LHHHHHHHHHHHLL-----LLEEEEE

DSSP HHHHHHHH1111LLLLLEEEEEELL-HHHHHHHHh1111eeEEEL-LEELL  
Query GGSLELRrgipdSRTSKDFATVARRD-IELIHEQLAdagetgwegftAIFTA-PEEIAA 118  
ident | | | | |  
Sbjct GSLSFALQG---vPVEVHDIDIQTDEEGAYEIERIFS-----EFVsxVRFSS 73  
DSSP HHHHHHLL---LLLLLLEEEEEELHhHHHHHHHLH-----HHEEEeEEEEEL

DSSP LLL1111LEEEEEeellleeEEEEEEEEEL-----LLLLLLEEEEEELhh  
Query PGXpVKPRRFTAKlsyrgrafATVPIEVSSV-----EAGNADQFDTLTSDalg 166  
ident | | | | |  
Sbjct EXI-CSHFGELII-----DGIXVEIMGDirxrledgtwedPVDLNXYRFVETH--- 121  
DSSP LLE-EEEEEEEE-----LLEEEEEEEEEe11111111LLLHHHEEEEEEL---

DSSP h11111LEEEEEELHHHHHHHHHHHh1111111111hHHHHHHHHHLLHHHhh  
Query lvgvpaAVAVPCXTIPWQIAQKLHAVtavleepkandrahDLVDLQLEGLLLDADlxpt 226  
ident | | | | |  
Sbjct -----GMXIPVLSLEYEYQAYLXLG-----RVEXAETLRXWLNERX---- 157  
DSSP -----LEEEEEELHHHHHHHHHHL-----LHHHHHHHHHHHLL---

DSSP hhhhhhhhhhh11111111111hhhhhhhh1111111111hhhhhhhhhhhh  
Query rsaciaifearaqhpwrvtlphwpliyagalegldhlelartvdaaaqavqrfrvari 286  
ident  
Sbjct ----- 157  
DSSP -----

DSSP hh1111  
Query dratkr 292  
ident  
Sbjct ----- 157  
DSSP -----

No 13: Query=mol1A Sbjct=4e8iB Z-score=9.2

[back to top](#)

```
DSSP 1111111111hhhhhhhhhhhhhh1111hhhhHHHHHHHHHHHHLL111111LEEEEE
Query aapyspntnlrslrdrltqvaerqgvfgrlqRHVAXIVVAQFAATLTddtgaPLLLVK 60
ident
Sbjct -----nnvTEKELFYILDLEFEHXK-----VTYWLD 25
DSSP -----111LHHHHHHHHHHHHLL-----LLEEEEE
```

```
DSSP HHHHHHHHLL1LLLLLLEEEEEEL-LHHHHHHHHhhhh111leeEEELLEEL111
Query GGSLELRRIpDSRTSKDFATVARR-DIELIHEQLADagetgwegftAIFTAPEEiaap 119
ident || | | | |
Sbjct GGWGDVLTGK-QQREHRDIDIDFDAqHTQKVIQKLED-----IGYKIEVHW--- 71
DSSP HHHHHHHHLL-LLLLLLEEEEEEEHhHHHHHHHHHH-----LLEEEEE---
```

```
DSSP 111LLEEEEEeeel1eeEEEEEEL-----LLL1LLEEEEE
Query gxpVKPRRFTAK1syrgrafATVPIEVSSV-----EAGNaDQFDLTS 162
ident | |
Sbjct --xPSRXELKHE-----EYGYLDIHPInlndgsitqanpeggnYVFQnDWFSETNY 121
DSSP --1LLEEEEEEL-----LLEEEEEEEeell111leeeel1eeEEELhHHHEEEEE
```

```
DSSP Lhhhh1111LLEEEELLHHHHHHhhHHHL11111111LHHHHHHHHHHHL1hhh
Query DalglvgvpaAVAVPCXTIPWQIAQK1hAVTAveepkandRAHDLVDLQLEGLL1dad 222
ident | | | | |
Sbjct K-----DRKIPCISKEAQLLFH--SGYD-----1TETDHFDIKNLKSIT---- 158
DSSP L-----LLEEEELHHHHHHHL--LLL-----1LHHHHHHHHHHHL-----
```

```
DSSP hhhhhhhhhhhhh111111111111hhhhhhhh1111111111hhhhhhhhhh
Query lxptrsaciaifearaqhpwprvatlphwplyagalegldhlelartvdaaaqavqrf 282
ident
Sbjct ----- 158
DSSP -----
```

```
DSSP hhhhhh1111
Query varidratkr 292
ident
Sbjct ----- 158
DSSP -----
```

No 14: Query=mol1A Sbjct=4fo1B Z-score=9.2

[back to top](#)

```
DSSP 1111111111hhhhhhhhhhhhhh1111hhhhHHHHHHHHHHHHLL111111LEEEEE
Query aapyspntnlrslrdrltqvaerqgvfgrlqRHVAXIVVAQFAATLTddtgaPLLLVK 60
ident
Sbjct -----nnvTEKELFYILDLEFEHXK-----VTYWLD 25
DSSP -----111LHHHHHHHHHHHHLL-----LLEEEEE
```

```
DSSP HHHHHHHHLL1LLLLLLEEEEEEL-LHHHHHHHHhhhh111leeEEELLEEL111
Query GGSLELRRIpDSRTSKDFATVARR-DIELIHEQLADagetgwegftAIFTAPEEiaap 119
ident || | | | |
Sbjct GGWGDVLTGK-QQREHRDIDIDFDAqHTQKVIQKLED-----IGYKIEVHW--- 71
DSSP HHHHHHHHLL-LLLLLLEEEEEEEHhHHHHHHHHHH-----LLEEEEE---
```

```
DSSP 111LLEEEEEeeel1eeEEEEEEL-----LLL1LLEEEEE
Query gxpVKPRRFTAK1syrgrafATVPIEVSSV-----EAGNaDQFDLTS 162
ident | |
Sbjct --xPSRXELKHE-----EYGYLDIHPInlndgsitqanpeggnYVFQnDWFSETNY 121
DSSP --1LLEEEEEEL-----LLEEEEEEEeell111leeeel1eeEEELhHHHEEEEE
```

```
DSSP Lhhhh1111LLEEEELLHHHHHHhhHHHL11111111LHHHHHHHHHHHL1hhh
Query DalglvgvpaAVAVPCXTIPWQIAQK1hAVTAveepkandRAHDLVDLQLEGLL1dad 222
ident | | | | |
Sbjct K-----DRKIPCISKEAQLLFH--SGYD-----1TETDHFDIKNLKSIT---- 158
DSSP L-----LLEEEELHHHHHHHL--LLL-----1LHHHHHHHHHHHL-----
```



DSSP HHHHHHHHLL-LLLLLEEEEEEEhHHHHHHHHHHH-----LLLEEEEL---

DSSP 1111LEEEEEeeel1eeEEEEEEL-----LLL1LEEEEE  
Query gxpVKPRRFTAK1syrgrafATVPIEVSSV-----EAGNaDQFDLTS 162  
ident | |  
Sbjct --xPSRXELKHE-----EYGyLDIHPInlnddgsitqanpegnYVFQnDWFSETNY 121  
DSSP --1LEEEEEEL-----LLEEEEEEEee11111eeee11111eEELhHHEEEEE

DSSP Lhhhh1111LEEEELLHHHHHHhhHHHL1111111LLHHHHHHHHHHLlhhh  
Query DalglvgvpaAVAVPCXTIPWQIAQKlhAVTAveepkandRAHDLVDLQLEGLLdad 222  
ident | | | | | |  
Sbjct K-----DRKIPCSKEAQLLFH--SGYD-----1TETDHFDIKnlKSIT---- 158  
DSSP L-----LEEEELHHHHHHHL--LLL-----1LHHHHHHHHHHHL-----

DSSP hhhhhhhhhhhhh111111111111hhhhhhhh111111111111hhhhhhhhhh  
Query lxptrsaciaifearaqhpwprvatlphwplyagalegldhlelartvdaaaqavqrf 282  
ident  
Sbjct ----- 158  
DSSP -----

DSSP hhhhhh1111  
Query varidratkr 292  
ident  
Sbjct ----- 158  
DSSP -----

No 17: Query=mol1A Sbjct=4wh5A Z-score=9.1

[back to top](#)

DSSP 1111111111hhhhhhhhhh1111hhhhHHHHHHHHHHHHLLL1111LEEEEE  
Query aapyspntnlrslrdrltqvaerqgvfgrlqRHVAXIVVAQFAATLTDdtgaPLLVK 60  
ident  
Sbjct -----nnvTEKELFYILDLEFEHXK-----VTYWLD 25  
DSSP -----111LHHHHHHHHHHHHHL-----LLEEEE

DSSP HHHHHH-HHLL11LLLLLEEEELL-LHHHHHHHHhhhh1111eeEELLLEEL11  
Query GGSLEL-RRGIpdsRTSKDFATVARR-DIELIHEQLADagetgwegftAIFTAPEEIAa 118  
ident | | | | | |  
Sbjct GGWGVdV1TGKQ--QREHRDIDIDFDAQHTQKVIKLED-----IGYKIEVHW-- 71  
DSSP HHHHHHHhLLL--LLLLLEEEEEEEhHHHHHHHHHHH-----LLEEEEEEE--

DSSP 1111LEEEEEeeel1eeEEEEEEL-----LLL1LEEEEE  
Query pgxpVKPRRFTAK1syrgrafATVPIEVSSV-----EAGNaDQFDLTS 161  
ident | |  
Sbjct ---xPSRXELKHE-----EYGyLDIHPInlnddgsitqanpegnYVFQnDWFSETN 120  
DSSP ---1LEEEEEEL-----LLEEEEEEEee11111eeee11111eEELhHHEEEEE

DSSP ELhhhh1111LEEEELLHHHHHHhhHHHL1111111LLHHHHHHHHHHLlhh  
Query SDalglvgvpaAVAVPCXTIPWQIAQKlhAVTAveepkandRAHDLVDLQLEGLLda 221  
ident | | | | | |  
Sbjct YK-----DRKIPCSKEAQLLFH--SGYD-----1TETDHFDIKnlKSIT---- 157  
DSSP EL-----LEEEELHHHHHHHL--LHH-----1LHHHHHHHHHHHL-----

DSSP hhhhhhhhhhhhh111111111111hhhhhhhh111111111111hhhhhhhhhh  
Query dlxptrsaciaifearaqhpwprvatlphwplyagalegldhlelartvdaaaqavqrf 281  
ident  
Sbjct ----- 157  
DSSP -----

DSSP hhhhhh1111  
Query fvaridratkr 292  
ident  
Sbjct -----t 158  
DSSP -----l

No 18: Query=mol1A Sbjct=4e8jA Z-score=9.1

[back to top](#)

```
DSSP 1111111111hhhhhhhhhhhhhh1111hhhhHHHHHHHHHHHHLL1111LLEEEE
Query aapyspntnlrslrdrltqvaerqgvfgrlqRHVAXIVVAQFAATLTddtgaPLLVK 60
ident
Sbjct -----nrvTEKELFYILDLEFEHXK-----VTYWLD 25
DSSP -----111LHHHHHHHHHHHHHHLL-----LLEEEE
```

```
DSSP HHHHHH-HLLL1111LLEEEEL-LHHHHHHHHHHhh1111eeEEELLEEL11
Query GGSSLEL-RRGIpDSRTSKDFATVARR-DIELIHEQLADagetgwegftAIFTAPEEIaa 118
ident || | | |
Sbjct GGWGDVLTGKQ--QREHRDIDIDFDAqHTQKVIQKLED-----IGYKIEVHW-- 71
DSSP HHHHHHHhLLL--LLLLLEEEEEEhHHHHHHHHHH-------LLEEEEEE--
```

```
DSSP 1111LLEEEEEEeellleeEEEEEEEL-----LLLL1LLEEEE
Query pgxpVKPRRFTAKlsyrgrafATVPIEVSSV-----EAGNaDQFDTLT 161
ident | |
Sbjct ---xPSRXELKHE-----EYGLDIHPInlndgsitqanpeggnYVFQnDWFSETN 120
DSSP ---1LLEEEEEEEL-----LLEEEEEEeell1111eeel1111eEELhHHHEEE
```

```
DSSP ELhhh11111LLEEEELHHHHHHHHhHHHL11111111LLHHHHHHHHHH11hh
Query SDalglvgvpaAVAVPCXTIPWQIAQK1hAVTAveepkandRAHDLVDLQLEGL11da 221
ident | | | | |
Sbjct YK-----DRKIPCISKEAQLLFH--SGYD-----1TETDHFDIKNLKS1---- 157
DSSP EL-----LEEEELHHHHHHHL--LHHH-----1LHHHHHHHHHHHL----
```

```
DSSP hhhhhhhhhhhhh1111111111hhhhhhhh1111111111hhhhhhhhhh
Query dlxptrsaciaifearaqhpwprvatlphwplyagaleglldhelartvdaaaqavqr 281
ident
Sbjct ----- 157
DSSP -----
```

```
DSSP hhhhhh1111
Query fvaridratr 292
ident
Sbjct -----t 158
DSSP -----l
```

No 19: Query=mol1A Sbjct=4e8iA Z-score=9.1

[back to top](#)

```
DSSP 1111111111hhhhhhhhhhhhhh1111hhhhHHHHHHHHHHHHLL1111LLEEEE
Query aapyspntnlrslrdrltqvaerqgvfgrlqRHVAXIVVAQFAATLTddtgaPLLVK 60
ident
Sbjct -----nrvTEKELFYILDLEFEHXK-----VTYWLD 25
DSSP -----111LHHHHHHHHHHHHHHLL-----LLEEEE
```

```
DSSP HHHHHHHHLL1111LLEEEEL-LHHHHHHHHHHhh1111eeEEELLEEL11
Query GGSSLELRRGIpDSRTSKDFATVARR-DIELIHEQLADagetgwegftAIFTAPEEiaap 119
ident || | | |
Sbjct GGWGDVLTGK-QREHRDIDIDFDAqHTQKVIQKLED-----IGYKIEVHW-- 71
DSSP HHHHHHHHLL-LLLLLLEEEEEEhHHHHHHHHHH-------LLEEEEEE--
```

```
DSSP 1111LLEEEEEEeellleeEEEEEEEL-----LLLLLLEEEEEE
Query gxpVKPRRFTAKlsyrgrafATVPIEVSSV-----EAGNADQFDLTLS 162
ident | |
Sbjct --xPSRXELKHE-----EYGLDIHPInlndgsitqanpeggnYVFQNDWFSETNY 121
DSSP --1LLEEEEEEEL-----LLEEEEEEeell1111eeel1111eEELHHHEEEEEE
```

```
DSSP Lhhh11111LLEEEELHHHHHHHHhHHHL11111111LLHHHHHHHHHH11hh
Query DalglvgvpaAVAVPCXTIPWQIAQK1hAVTAveepkandRAHDLVDLQLEGL11dad 222
ident | | | | |
Sbjct K-----DRKIPCISKEAQLLFH--SGYD-----1TETDHFDIKNLKSIT---- 158
DSSP L-----LEEEELHHHHHHHL--LLL-----1LHHHHHHHHHHHL----
```





Sbjct rtnctgntisftrmrlrlllekrkqkqtsfvvtpefdffkddletqakldpskarfknts 462  
DSSP 111ee11111hhhhhhhhhhhhhhhhhh11111lee1hhhh1111hhhhhh11111lee111

DSSP -----1  
Query -----r 292  
ident  
Sbjct gnkimvpkyllfkidnngniednihseeaeise 495  
DSSP 11111hhhh1lee1111lee11111lee11

No 21: Query=mol1A Sbjct=4hx0A Z-score=8.5

[back to top](#)

DSSP 111111111hhhhhhhhhhhhhhhh1111hHHHHHHHHHHHHHHHHLLL11111LEEEE  
Query aapyspntnlrslrdrltqvaerqgvvfgrLQRHVAXIVVAQFAATLTddtgaPPLLVK 60  
ident  
Sbjct -----hhhhhmiRPEYLRVLRKIYDRLKNEK-----VNWVVT 32  
DSSP -----1hhh111LHHHHHHHHHHHHHHHHLLL-----LLEEEE

DSSP HHHHHHHHH111LLLLLLEEEEEELL-HHHHHHHHHhhhhh1111eeeEELL-LEELL  
Query GGSLLELRrgipDSRTSKDFATVARRD-IELIHEQLAdagetgwegftaIFTA-PEEIAA 118  
ident | | | | | | |  
Sbjct GSLSFALQG---VPVEVHDIDIQTDEEGAYEIERSFS-----eFVSKkVRFSSST 78  
DSSP HHHHHHHLL---LLLLLLEEEEEELHHhHHHHHHHLLH-----hHEEEeEEEEEL

DSSP LLL1111LEEEEEEEe11leeEEEEEEL-----LLLLLLEEEEEELhhh  
Query PGXpVKPRRFTAKlsyrgrafATVPIEVSSV-----EAGNADQFDLTSDalg 166  
ident | | | | | | | | | | | | | | | | |  
Sbjct EKI-CSHFGELII-----DGIKVEIMGDirkrlwedgtwedPVDLNKYKRFVETH--- 126  
DSSP LLE-EEEEEEEEE-----LLEEEEEEEEEE111111111LHHHHHEEEEEEL---

DSSP h11111LEEEEEELHHHHHHHHHHHLL--LLLL11111hhhhhhhhhh11hhhhh  
Query lvgvpaAVAVPCXTIPWQIAQKLHAVTAV--LEEPKandrahdldvdlqlleg11ldadlx 224  
ident | | | | | | | | | | | | | | | | | | | | | |  
Sbjct -----GMKIPVLSLEYEYQAYLKLGRVEkaETLRK----- 156  
DSSP -----LEEEEEELHHHHHHHHHHHHHHHHHHH-----

DSSP hhhhhhhhhhh11111111111hhhhhhhh111111111hhhhhhhhhh  
Query ptrsaciaifearaqpwwprvatlphwpliayagalegldhlelartvdaaaqavqrqfva 284  
ident  
Sbjct ----- 156  
DSSP -----

DSSP hhhh1111  
Query ridratkr 292  
ident  
Sbjct ---wlner 161  
DSSP ---hhh11

No 22: Query=mol1A Sbjct=4tura Z-score=7.4

[back to top](#)

DSSP -----  
Query ----- 0  
ident  
Sbjct pqetlnggitdmltelanfeknvsqaihkyayrkaasviakyphkiksgaeakklpgvg 60  
DSSP 1111111111111111111111111111111111111111111111111111111111111

DSSP -----11111111  
Query -----aapyspnt 9  
ident  
Sbjct tkiaekideflatgklrklekirqddtssinflttrvsgigpsaarkfvdegiktledlr 120  
DSSP hhhhhhhhhhh111hhhhhhhh1hhhhhhhh111111111hhhhhhhh11111hhhh

DSSP 1hhhhhhhhhhhh1111hhhhhHHHHHHHHHHHHHHH-LLLL11111LEEEEHHHHHHH

```

Query nlrslrdrltqvaerqgvfgrlqRHVAXIVVAQFAA-TLTDdtGAPLLLKGGSSLELr 68
ident | |
Sbjct knedklnhhqriglkyfgdfekriPREEMLQMQDIVLnEVKKvdSEYIATVCGSFRRGA- 179
DSSP hlhhh11hhhhhhhh11hhh11leEHhhhhhhhhhhhhhhhhhh11LLEEEELHHHHLLL-

DSSP h1111111LLEEEEL-----1LHHHHHHHHHHHHhh1111eeEEELLEE111
Query rgipdsrTSKDFATVAR-----rDIELIHEQLADAGetgwegftAIFTAPEEiaa 118
ident | | | | | | | | |
Sbjct -----eSSGMDVLLThpsftsesqpkLLHQVVEQLQKVH-----FITDTLSK--- 222
DSSP -----1EELLEEEL1111111111hHHHHHHHHHHLL-----LEEEEEE---

DSSP 1111LLEEEEEEEL--LEEEEEEEL-LLLL1111eeee1hhhh1111lee
Query pgxpVKPRRFTAKLSYR--GRAFATVPIEVSSV-EAGNadqfdtltsdalglvgpaava 175
ident | | | | |
Sbjct ---gETKFMGVCQLPSKndEKEYPHRRIDIRLlpKDQY----- 257
DSSP ---1LLEEEELLLL11111111LLEEEEEEEL1HHHH-----

DSSP eeellhHHHHhhhhhh1111111111111111HHHH-----hhhhhhh
Query vpcxtiPWQIaqklhavlavleekandraHDLV-----dlqlleg 216
ident | | | | |
Sbjct -----yCGVL-----yftgSDIFnknmrahaiekgtineytirplgvt 296
DSSP -----hHHHH-----hhlLHHHHhhhhhhhhhh11eeel11lee1111

DSSP h11hHHHHhhHHHHhhhh111111111111hhhhhhhh1111111111hhhhh
Query 111dADLXPtrSACIaifearaqhWPPRvatlphwpliyagaleglldhlelartvdaaa 276
ident | | | | | | | | | | | | | | |
Sbjct gvagEPLPV--DSEK----difdYIQWK----- 318
DSSP 1111111111--LLHH-----hhhhHLLL-----

DSSP hhhhhhhhhhh1111
Query qavqrfvaridrskr 292
ident | |
Sbjct -----yrepkdrse 327
DSSP -----111hh111

```

No 23: Query=mol1A Sbjct=4p37A Z-score=7.3

[back to top](#)

```

DSSP -----1111111111hHHHHHHHHHHhh1111hhhhhhHHHHHHHH
Query -----aapyspptnlrSLDRDLTQVaerqgvfgrlqRHVAXIVVA 42
ident | |
Sbjct nrrnklsyqeyvvgdyevrkk1peiikqARTKASQVX-----eptiyekRVVXEIIK 54
DSSP 1111111111111111hhhhhhhhhhhhHHHHHHHHH-----11hhhhHHHHHHHH

DSSP HHHHLL1111111LEEEHHHHHHHHHLL--LLLLL-----1LLEEEEL1HHHHHHH
Query QFAATLtddtgapLLLKGGSSLELRRG---IPDSRT----sKDFATVARRdIELIHEQL 95
ident | | | | | | | | | | | | |
Sbjct DFIRDK-----GRKVYGGTALNETIKkknPEDAIYdsylfSDIEFYSPV-PVPDLKEL 106
DSSP HHHHHH-----LLEEHhhhhhhhhhhhh11111111LLEEEEL--HHHHHHH

DSSP HHHHHH1111leeEELLEE11111111LEEEEEEeeel1111111111111111
Query ADAGETGwegftAIFTAPEEiaapxpvKPRRFTAKlsyrgrafaTVPIEVSSV--eagn 153
ident | | | | |
Sbjct CDILYHK--gydpVQGKEAQH-----EETYSIFV-----n1QLYCDITYVptkvyh 150
DSSP HHHHHHLL--1111LEEEEL-----LLEEEEEE-----11LEEEEEEEL1hhhhh

DSSP 1LLEEEEL1hhhh11111111eEEELHHHHHHHHHHHLLL1111111111111111111111111111
Query adQFDLTLtsdalglvgpaavAVPCXTIPWQIAQKLHAVTAVLEepkANDRAHDLVDLQL 213
ident | | | | | | | | | | | | | | |
Sbjct gIKTIEID-----GINYTHPHFXLIDYLRXINQPLT-aaEQRWEKAFDRXYV 196
DSSP hLLEEEEL-----LEEEELHHHHHHHHHHHHHLLHHH-hhHHHHHHHHHHHHH

DSSP HHH-HLLHH-----
Query LEG-LLLDA----- 221
ident | |
Sbjct LLKnYPXEKydnxsritsprddixyigkvksefxfkipeiqesclisgfdaynfirhax 256
DSSP HHHhLLEEL1111111111111111hhhhhhhhhhhhhhhhhh11eeel1hhhhhhhhhhhhhh

```

DSSP -----hHHHHHHHHHHHHH-----  
Query -----dlxptrsaciaIFEA----- 236  
ident |  
Sbjct gdrslkfnitvlpfxelisvkykdtveklvynflrekvvpdlitideyfplfQFTGysvs 316  
DSSP 11111hh11111leeeel1hhHHHHHHHHHH111hhHeeeel11111LLLee

DSSP -----hLLLL-----LLLL11111hhHHHHHH11111111  
Query -----rAQHP-----WPPRvatlphwplyagalegdhlelar 270  
ident |  
Sbjct inydgipivkvyeadYCVPdikttsgyryvSYQY----- 351  
DSSP ee1leeeeee111LEEEel11leeeLHHH-----

DSSP 1hhHHHHHHHHHH-----hHLLL-----  
Query tvdaaaqavrFVARI-----dRATK----- 291  
ident |  
Sbjct -----iLXIXYiskfkaHldknkexyfnYGIAisnlvqarnsylqknigvndt 401  
DSSP -----hHHHHHHHHHHHH111hhHHHHHHHHHHHHHHHHHHHH11111111

DSSP -----  
Query ----- 291  
ident |  
Sbjct vfsefricigtvtvsytrxlrxlekkqkviqfvytpkqyfsqtpeqqnfdesxk 461  
DSSP 1111111leel1111hhHHHHHHHHHH1111111leelhHHHH111hhHHHHHHHH

DSSP -----1  
Query -----r 292  
ident |  
Sbjct yrfkntsgnkitipknllfkiderniseeisteeay 498  
DSSP 111111111111hh1leee1111leee111111

No 24: Query=mol1A Sbjct=5j29A Z-score=7.3

[back to top](#)

DSSP -----  
Query ----- 0  
ident |  
Sbjct tlnggitdmltelanfeknvsqaihkynayrkaasviakyphkiksgaeakklpgvgtki 60  
DSSP 111hhHHHHHHHHHHHH111hhHHHHHHHHHHHH1111111hh1111111hh

DSSP -----11111111hh  
Query -----aapyspptnlr 12  
ident |  
Sbjct aekideflatgklrklekirddtssinfltrvsgigpsaarkfvddegiktledlrkne 120  
DSSP hhhhhhhhh111hhHHHHHHHH1111111hhHHHHHH111111hhHHHH11h

DSSP hhhhhhhhhhh1111hhHHHHHHHHHHHHH-LLLL11LLLLEEEHHHHHHHHhh11  
Query slrdrltqvaerqgvfgrlqrHVAXIVVAQFAA-TLTDdtGAPLLLKVGSSLELrri 71  
ident | |  
Sbjct dklnhhqriglkyfgdfekriPREEMLMQDIVLNEVKKvdSEYIATVCGSFRGA----- 176  
DSSP hh11hhHHHHHH111hh11eEHHHHHHHHHHHHHHHH11LLEEEELHHHHLL-----

DSSP 1111LLLLEEEEL-----1LHHHHHHHHHHHHhh111leEEELLEE1111  
Query pdsrTSKDFATVAR-----rDIELIHEQLADAGetgwegftAIFTAPEEiaap 119  
ident | | |  
Sbjct ---eSSGDMDVLLThpsftsestqpkLLHQVVEQLQKVH-----FITDTLSK----- 221  
DSSP ---1EELLEEEEE11leel1e1111HHHHHHHHHLL-----LEEEEEEE-----

DSSP 1111LLLLEEEEEEEL--LEEEEEEEEEEL-LLLL111leee1hhhh1111leee  
Query gxpVPRRFTAKLSYR--GRAFATVPIEVSSV-EAGNadqfdtltsdalglvvpaaav 176  
ident | |  
Sbjct --gETKFMGVCQLPSKndEKEYPHRRIDIRLlpKDQY----- 256  
DSSP --1LLEEEEEE11111111LLLEEEEEEEL1HHH-----

DSSP eel1hhHHHHhhHHHH1111111111HHH-----hhhhhhh  
Query pcxtiPWQIaqlhvtavleepkandraHDLV-----dlqllegl 217

```

ident |
Sbjct ---yCGVL-----yftgSDIFnknmrahalekgftineytirplgvtg 296
DSSP ---hHHHH-----hhlLHHHHhhhhhhhhhhleeellleeeelll

DSSP 11hHHHHhhHHHHhhhhhh111LLLLL11111hhhhhhhh111111111hhhhhh
Query 1ldADLXPtRSACIaifearaqhPWPPRVatlpwpliYagalegldhlelartvdaaaq 277
ident |
Sbjct vagEPLPV--DSEK----difdYIQWKY----- 318
DSSP eeLLLLL--LHH----hhhhLLLLL-----

DSSP hhhhhhhhh1111
Query avqrfvaridratkr 292
ident |
Sbjct -----repkdrse 326
DSSP -----11hh111

```

No 25: Query=mol1A Sbjct=4p2hA Z-score=7.3

[back to top](#)

```

DSSP ----- 0
Query -----
ident |
Sbjct tlnggitdmltelanfeknvsqaihkynayrkaasviakyphkiksgaeakklpgvgtki 60
DSSP 111hhhhhhhhhhhhhh1111hhhhhhhhhhhhhh111111hhhh111111hh

```

```

DSSP -----11111111hh
Query -----aapyspntlr 12
ident |
Sbjct aekideflatgklrklekirqddtssinfltrvsgigpsaarkfvdegiktledlrkne 120
DSSP hhhhhhhhh111hhhhhhhh1hhhhhhhh111111hhhhhhhh1111hhhh11h

```

```

DSSP hhhhhhhhh1111hhhhHHHHHHHHHHH-LLLL111LLEEEHHHHHHhh11
Query slrdrltqvaerqgvfgrlqRHXIVVAQFAA-TLTDdtGAPLLLVKGGSSLElrrgi 71
ident | |
Sbjct dklnhhqriglkyfgdfekriPREEMLMQDIVLnEVKKvdSEYIATVCGSFRGA---- 176
DSSP hh11hhhhhh111hh11eHHHHHHHHHHHHHHHHH1LLEEEELHHHLL----

```

```

DSSP 1111LLEEEEL-----1LHHHHHHHHHHHHhh1111eeEELLEE11111
Query pdsrTSKDFATVAR-----rDIELIHEQLADAGetgwegftAIFTAPEEiaapgx 121
ident | | | |
Sbjct ---eSSGDMVLLThpsftsesqpkLLHQVVEQLQKVH-----FITDTLSK----- 219
DSSP ---1EELLEEEEEE1111111111HHHHHHHHHLL-----LEEEEEE-----

```

```

DSSP 1LLEEEEEEEL--LEEEEEEEL-LLLL1111eeeehhhh11111eeeee
Query pVKPRRFTAKLSYR--GRAFATVPIEVSSV-EAGNadqfdtltsdalglvgvpaavavpc 178
ident | |
Sbjct gETKFMGVCQLPSKndEKEYPHRRIDIRLIpKDQY----- 254
DSSP 1LLEEEEEEELLLL11LLLLLLEEEEEEEL1HHHH-----

```

```

DSSP 11hHHHHhhhhhh1111111111HHHH-----hhhhhh11hh
Query xtiPWQIaqklhavtavleekandraHDLV-----dlqlleg111da 221
ident |
Sbjct ---yCGVL-----yftgSDIFnknmrahalekgftineytirplgvtgva 296
DSSP --hHHHH-----hhlLHHHHhhhhhhhhhh1leeellleee11111111

```

```

DSSP hhhhhHHHHhhhh111LLLLL11111hhhhhhhh111111111hhhhhhhh
Query dlxpTRSACIaifearaqhPWPPRVatlpwpliYagalegldhlelartvdaaaqavqr 281
ident |
Sbjct gep1pvDSEKD----ifdYIQWK----- 315
DSSP 11111LHHH-----hhHLLL-----

```

```

DSSP hhhhh1111
Query fvaridratkr 292
ident |
Sbjct --yrepkdrse 324
DSSP --111hh111

```

No 26: Query=mol1A Sbjct=4yn4A Z-score=7.3

[back to top](#)

```
DSSP -----
Query ----- 0
ident
Sbjct pqetlnggitdmltelanfeknvsqaihknayrkaasviakypkiksgaeakklpgvg 60
DSSP 11hhhhhhhhhhhhhhhhhhhh1111hhhhhhhhhhhhhhhh111111hhhh111111
```

```
DSSP -----111111111
Query -----aapysppt 9
ident
Sbjct tkiaekideflatgklrklekirqddtsssinfltrvsgigpsaarkfvdegiktledlr 120
DSSP hhhhhhhhhhhhh111hhhhhhhhhhhhhhhh111111hhhhhhhhhh1111hhhhh
```

```
DSSP 1hhhhhhhhhhhhhh111hhhhhhHHHHHHHHHHHHHHH-LLLL11LLLEEEHHHHHHHH
Query nlrslrdrltqvaerqgvfgrlqRHVAXIVVAQFAA-TLTDdtGAPLLLVKGGSSLELR 68
ident
Sbjct knedklnhhqrigrkyfgdfekriPREEMLQMQRDIVLnEVKKvdSEYIATVCGSFRRGA- 179
DSSP hlhhh11hhhhhhhh11hhhh11eHHHHHHHHHHHHHHHHH11LLLEEEELHHHHLLL-
```

```
DSSP h111111LLLEEEEL-----1LHHHHHHHHHHHHhh1111eeEEELLLEE111
Query rgipdsrTSKDFATVAR-----rDIELIHEQLADAGetgwegftAIFTAPEEiaa 118
ident
Sbjct -----eSSGDMVLLThpsftsesqpkLLHQVVEQLQKVH-----FITDTLSK--- 222
DSSP -----1EELLEEEEEE1111111111HHHHHHHHHHHLL-----LEEEEEE---
```

```
DSSP 1111LLLEEEEEEEL--EEEEEEEEEEELLLL1111eeehhhh111111ee
Query pgxpVKPRRFTAKLSYRG--RAFATVPIEVSSVEAGNAdqfdtlttsdalglvgvpaavav 176
ident
Sbjct ---gETKFMGVCQLPSKNdeKEYPHRRIDIRLIPKDQY----- 257
DSSP ---1LLEEEEEEELLLL1111LLLEEEEEEELHHHH-----
```

```
DSSP eellhHHHHhhhhhhhh1111111111HHHH-----hhhhhhh
Query pcxtiPWQIaqklhavtavleepkandraHDLV-----dlqllegl 217
ident
Sbjct ---yCGVL-----yftgSDIFnknmrahalekgftineytirplgvtg 297
DSSP ---hHHHH-----h111LHHHHhhhhhh111111eeel111eeel1111
```

```
DSSP 1hhHHHHhhHHHHhhhhhh1111LLLL111111hhhhhhhhhh1111111111hhhhhh
Query lldaDLXPTrSACIAifearaqhWPPRvatlphwplyagalegldhlelartvdaaaq 277
ident
Sbjct vagePLPV--DSEKD----ifdYIQWK----- 318
DSSP 1111LLLL--LLHHH-----hhhLLLL
```

```
DSSP hhhhhhhhhhh1111
Query avqrfvaridratkr 292
ident
Sbjct -----yrepkdrse 327
DSSP -----111hhhh111
```

No 27: Query=mol1A Sbjct=4pgqA Z-score=7.3

[back to top](#)

```
DSSP -----
Query ----- 0
ident
Sbjct etlnggitdmltelanfeknvsqaihknayrkaasviakypkiksgaeakklpgvgtk 60
DSSP 1111hhhhhhhhhhhhhhhhhhhh1111hhhhhhhhhhhhhhhh111111hhhh111111hh
```

```
DSSP -----111111111h
Query -----aapyspptnl 11
ident
Sbjct iaekideflatgklrklekirqddtsssinfltrvsgigpsaarkfvdegiktledlrkn 120
```

DSSP hhhhhhhhhhhllllhhhhhhhhhhhhhhhhllllllhhhhhhhhhhllllllhhhhhhll

DSSP hhhhhhhhhhhllllhhhhHHHHHHHHHHHH-LLLL11LLLEEEHHHHHHhhhl  
Query rslrdrldtqvaerqgvfgrlqRHVAXIVVAQFAA-TLTDdtGAPLLLVKGGSSLElrrg 70  
ident | |  
Sbjct edklnhhqrigrkygdfekriPREEMLQMqDIVLnEVKKvdSEYIATVCGSFRRG---- 176  
DSSP hhhllhhhhhhhhllhhhlleEHHHHHHHHHHHHHHHHhh1LLLEEEELHHHHLL----

DSSP 111LLLEEEEEEEL-----1LHHHHHHHHHHHHhhlllleEEELLEE1111  
Query ipdSRTSKDFATVAR-----rDIELIHEQLADAGetgwegftAIFTAPEEiaapg 120  
ident | | | |  
Sbjct ---AESSGDMDVLLThpsftsesqpkLLHQVVEQLQKVH-----FITDTLSK----- 220  
DSSP ---LLEELLEEELLLL11111111hHHHHHHHHHHHLL-----LEEEEEE-----

DSSP 111LLLEEEEEEEL-LEEEEEEELLLL111leeeehhhhhllllleeeel  
Query xpVKPRRF TAKLSYR-GRAFATVPIEVSSVEAGNAdqfdtltsdalglvgvpaavavpcx 179  
ident | | |  
Sbjct -gETKFMGVCQLPSKdEKEYPHRRIDIRLIPKDQY----- 254  
DSSP -1LEEEEEEELLLL1LLLEEEEEEELHHHH-----

DSSP 1hHHHHhhhhhhllllllllllllHHHH-----hhhhhhhhllhh  
Query tiPWQIaqlhavlavleepkandraHDLV-----dlqllegllldad 222  
ident |  
Sbjct -yCGVL-----yftgSDIFnknmrahalekgftineytirplgvtgvag 297  
DSSP -hHHHH-----hlllHHHHhhhhhhhhllleellleellllllll

DSSP hhhhhHHHHhhhhllllllllllllhhhhhhhhllllllllllhhhhhhhhhh  
Query lxptrSACIAifearaqhPWPPrvatlphwplyagaleglhdhlelartvdaaaqavqrf 282  
ident |  
Sbjct eplpvDSEKD----ifdYIQWK----- 315  
DSSP 11111LLHHH-----hhhLLLL-----

DSSP hhhhhllll  
Query varidratkr 292  
ident |  
Sbjct -yrepkdrse 324  
DSSP -111hhhhll

No 28: Query=mol1A Sbjct=5j0vA Z-score=7.3

[back to top](#)

DSSP -----  
Query ----- 0  
ident -----  
Sbjct apqetlnggitdmltelanfeknvsqaihkynayrkaasviakyphkiksgaeakklpgv 60  
DSSP 11111111hhhhhhhhhhhhhhhhllllhhhhhhhhhhhhhhllllllhhhhhhllllll

DSSP -----11111111  
Query -----aapysspp 8  
ident -----  
Sbjct gtkiaekideflatgklrklekirqddtssinfltrvsgigpsaarkfvdegiktledl 120  
DSSP 1hhhhhhhhhhhhllllhhhhhhhhhhhhhhllllllhhhhhhhhhhllllllhhhh

DSSP 1hhhhhhhhhhhhllllhhhhHHHHHHHHHHHH-LLLL11LLLEEEHHHHHHhh  
Query tnrlsldrldtqvaerqgvfgrlqRHVAXIVVAQFAA-TLTDdtGAPLLLVKGGSSLEl 67  
ident | |  
Sbjct rknedklnhhqrigrkygdfekriPREEMLQMqDIVLnEVKKvdSEYIATVCGSFRRG- 179  
DSSP hllhhhl1hhhhhhhhllhhhhllleEHHHHHHHHHHHHHHHHhh1LLLEEEELHHHHLL----

DSSP hh1111LLLEEEEEEEL-----1LHHHHHHHHHHHHhhlllleEEELLEE1111  
Query rrgipdSRTSKDFATVAR-----rDIELIHEQLADAGetgwegftAIFTAPEEiaap 119  
ident | | | |  
Sbjct -----AESSGDMDVLLThpsftseskLLHQVVEQLQKVH-----FITDTLSK----- 221  
DSSP -----LLEELLEEELLLL11111111HHHHHHHHHHHLL-----LEEEEEE-----

DSSP 111LLLEEEEEEEL--EEEEEEEELLLL111leeeehhhhhllllleee



```

Query  gxpVKPRRFTAKLSYRG--RAFATVPIEVSSV-EAGNadqfdtlttsdalglv gvpavav 176
ident  | |
Sbjct  --gETKFMGVCQLPSKNdeKEYPHRRIDIRLIpKDQY----- 256
DSSP   --1LLEEEEEELLLLLL11LLLLLEEEEEEL1HHHH-----

DSSP   eellhHHHHhhhhhhhh111111111111HHHH-----hhhhhhhh11
Query  pcxtiPWQIaqklhavtavleepkandraHDLV-----dlqllegl11 219
ident  |
Sbjct  ----yCGVL-----yftgSDIFnknmrahalekgftineytirplgvtg 296
DSSP   ----hHHHH-----hhh1LHHHHhhhhhhhhhh1lee1111ee11111

DSSP   hhhhhhhHHHHhhhhhh1111LLLLL111111hhhhhhhh1111111111hhhhhhhh
Query  dadlxptrSACIAifearaqhPWPPRvatlphwpliyagalegl dhlelartvdaaaqav 279
ident  |
Sbjct  vageplpvDSEKD----ifdYIQWK----- 317
DSSP   11111111LLHHH----hhHLLLL-----

DSSP   hhhhhhhhh1111
Query  qrfvaridratkr 292
ident  |
Sbjct  ----yrepkdrse 326
DSSP   ----111hhhh111

```

No 29: Query=mol1A Sbjct=5j0uA Z-score=7.3

[back to top](#)

```

DSSP   -----11111111
Query  -----aapyspp 8
ident  |
Sbjct  gtkiaekideflatgklrklekirqddtssinfltrvsgigpsaarkfvddegiktledl 120
DSSP   1hhhhhhhhhhhh11hhhhhhhh1hhhhhhhh1111111hhhhhhhh11111hhhh

DSSP   11hhhhhhhhhhhh1111hhhhHHHHHHHHHHHHH-LLLL1111LLEEEHHHHHHH
Query  tnlrslrdrltqvaergvfgrlqRHVAXIVVAQFAA-TLTDdtGAPLLLVKGGSSLEI 67
ident  | |
Sbjct  rknedklnhhqriglkyfgfekriPREEMLQMQDIVLnEVKkvdSEYIATVCGSFRRG- 179
DSSP   h11hhh11hhhhhh11hhhh11eEHHHHHHHHHHHHHHHH11LLEEEELHHHHL-

DSSP   hh1111LLLLLEEEEL-----1LHHHHHHHHHHHHhh1111eeEEELLEE1111
Query  rrgipdSRTSKDFATVAR-----rDIELIHEQLADAGetgwegftAIFTAPEEiaap 119
ident  | | |
Sbjct  -----AESSGDMDVLLThpsftseskLLHQVVEQLQKVH-----FITDTLSK---- 221
DSSP   -----LLEELLEEEEEE11111111HHHHHHHHHHHLL-----LEEEEEE----

DSSP   1111LLEEEEEEEL--EEEEEEEEEEEL-LLLL1111eeeee1hhhh11111lee
Query  gxpVKPRRFTAKLSYRG--RAFATVPIEVSSV-EAGNadqfdtlttsdalglv gvpavav 176
ident  | |
Sbjct  --gETKFMGVCQLPSKNdeKEYPHRRIDIRLIpKDQY----- 256
DSSP   --1LLEEEEEELLLLLL11LLLLLEEEEEEL1HHHH-----

DSSP   eellhHHHHhhhhhhhh111111111111HHHH-----hhhhhhhh11
Query  pcxtiPWQIaqklhavtavleepkandraHDLV-----dlqllegl11 219
ident  |
Sbjct  ----yCGVL-----yftgSDIFnknmrahalekgftineytirplgvtg 296
DSSP   ----hHHHH-----hhh1LHHHHhhhhhhhhhh1lee1111ee11111

DSSP   hhhhhhhHHHHhhhhhh1111LLLLL111111hhhhhhhh1111111111hhhhhhhh
Query  dadlxptrSACIAifearaqhPWPPRvatlphwpliyagalegl dhlelartvdaaaqav 279
ident  |
Sbjct  vageplpvDSEKD----ifdYIQWK----- 317
DSSP   11111111LLHHH----hhHLLLL-----

```



```
Sbjct tlnggitdmltelanfeknvsqaihkynayrkaasviakyphkiksgaeakklpgvgtki 60
DSSP 111hhhhhhhhhhhhhhhh111hhhhhhhhhhhhhhhh1111111hhhhh11111hhhh

DSSP -----111111111hh
Query -----aapyspntlr 12
ident

Sbjct aekideflatgklrklekirqddtssinfltrvsgigpsaarkfvdegiktledlrkne 120
DSSP hhhhhhhhhhh111hhhhhhhhhhhhhhhh1111111hhhhhhhhhh11111hhhhhhhh

DSSP hhhhhhhhhhh1111hhhhHHHHHHHHHHHHHH-LLLL111LLEEEHHHHHHHHhh11
Query slrdrltqvaerqgvfgrlqRHVAXIVVAQFAA-TLTDdtGAPLLLKGGSSLELrrgi 71
ident | |
Sbjct dklnhhqriglkyfgdfekriPREEMLMQDIVLnEVKKvdSEYIATVCGSFRRGA---- 176
DSSP hhl1hhhhhhhhhh1hhhhhh1leEHHHHHHHHHHHHHHHHLL11LLEEEHHHHLLL----

DSSP 1111LLEEEEEEEL-----1LHHHHHHHHHHHHhh111leeEEELLEEL11111L
Query pdsrTSKDFATVAR-----rDIELIHEQLADAGetgwegftAIFTAPEEiaapgxpv 123
ident | | | |
Sbjct ---eSSGMDVLLThpsftseskLLHQVVEQLQKVH-----FITDTLSKG-----E 219
DSSP ---1EELLEEEEEE11111111HHHHHHHHHHHLL-----LEEEEEEEL-----L

DSSP LLEEEEEEEEEELEEEEEEEEEEEEL-LLLL111leeeelhhhh11111leeeellhh
Query KPRRFTAKLSYRGRAFATVPIEVSSV-EAGNadqfdt1tsdalglvgvpaavavpctiP 182
ident | |
Sbjct TKFMGVCQLPSKEKEYPHRRIDIRLIpKDQY-----yC 252
DSSP LEEEEEEELLLL11111LLEEEEEEEEL1HHHH-----hh

DSSP HHHhhhhhhhh1111111111HHHHHHHH-----hhhhh11hHHH
Query WQIaqlhavlavlepkandraHDLVDLQ-----1leg111dADL 223
ident | |
Sbjct GVL-----yftgSDIFNKNmkahalekgftineytirplgvgtvagEPL 296
DSSP HHH-----hhh1LHHHHHHHHhhhhhh11lee111lee111111111L

DSSP HHHhHHHHhhhhhh111L1111111111hhhhhhhhhh1111111111hhhhhhhhhh
Query XPtrSACIaifearaqhPWPRVat1phwpliyagalegldhlelartvdaaaqavrFv 283
ident
Sbjct PV--DSEK-----difdYIQWKY----- 312
DSSP LL--LLHH-----hhhhHLLL-----

DSSP hhhhh1111
Query aridratkr 292
ident
Sbjct -repkdrse 320
DSSP -11hhhh111
```

No 32: Query=mol1A Sbjct=4f5nA Z-score=7.3

[back to top](#)

```
DSSP -----
Query ----- 0
ident

Sbjct qetlnggitdmltelanfeknvsqaihkynayrkaasviakyphkiksgaeakklpgvgt 60
DSSP 1hhhhhhhhhhhhhhhhhhhh1111hhhhhhhhhhhhhhhh1111111hhhhh11111h

DSSP -----111111111
Query -----aapyspntn 10
ident

Sbjct kiaekideflatgklrklekirqddtssinfltrvsgigpsaarkfvdegiktledlrk 120
DSSP hhhhhhhhhhh111hhhhhhhhhhhhhhhh1111111hhhhhhhhhh11111hhhhhhhh

DSSP hhhhhhhhhhh1111hhhhHHHHHHHHHHHHHH-LLLL111LLEEEHHHHHHHHhh
Query lrsldrltqvaerqgvfgrlqRHVAXIVVAQFAA-TLTDdtGAPLLLKGGSSLELrr 69
ident | |
Sbjct nedklnhhqriglkyfgdfekriPREEMLMQDIVLnEVKKvdSEYIATVCGSFRRGA-- 178
DSSP 1hhh1hhhhhhhhhhhhhh1leEHHHHHHHHHHHHHHHHHHLLLEEEHHHHLLL--
```



DSSP ---hHHHH-----hhlLLLLHHHHhhhhhhllleellllllleelllllll

DSSP 1hHHHHhhHHHHhhhhhh1111LLLLL1111hhhhhhhh1111111111hhhhhhh  
 Query ldADLXptRSACIaifearaqhpWPPRVatlphwpliyagalegldhlelartvdaaaqa 278  
 ident |  
 Sbjct agEPLP--VDSEQ-----difDYIQW----- 314  
 DSSP 11LLLL--LLLHH-----hHHHHLL-----

DSSP hhhhhhhhh1111  
 Query vqrfvaridratkr 292  
 ident  
 Sbjct ----ryrepkdrse 324  
 DSSP ----1111hhhh1

No 34: Query=mol1A Sbjct=lzjma Z-score=7.3

[back to top](#)

DSSP -----  
 Query ----- 0  
 ident  
 Sbjct tlnggitdmltelanfeknvsqaihkynayrkaasviakyphkiksgaeakklpgvgtki 60  
 DSSP 111hhhhhhhhhhhhhh1111hhhhhhhhhhhhhh1111111hhhh11111hh

DSSP -----111111111hh  
 Query -----aapyspntlr 12  
 ident  
 Sbjct aekideflatgklrklekirqddtssinfltrvsgigpsaarkfvddegiktledlrkne 120  
 DSSP hhhhhhhhh111hhhhhhhh1hhhhhhhh1111111hhhhhhhh11111hhhh11h

DSSP hhhhhhhhh1111hhhhHHHHHHHHHHHH-LLLL11LLLLEEEEHHHHHHhh11  
 Query slrdrltqvaerqgvfgrlqRHVAXIVVAQFAA-TLTDdtGAPLLLKVGGSSELELrgi 71  
 ident | |  
 Sbjct dklnhhqriglkyfgdfekriPREEMLQMqDIVLnEVKKvdSEYIATVCGSFRRGA---- 176  
 DSSP hhl1hhhhhhhh1hhhh11eEHHHHHHHHHHHHHHHH11LLEEEELHHHHLL-----

DSSP 1111LLLLEEEEEL-----1LHHHHHHHHHHHHhh1111eeEEELLEEL11111  
 Query pdsrTSKDFATVAR-----rDIELIHEQLADAGetgwegftAIFTAPEEiaapgxp 122  
 ident | | | |  
 Sbjct ---eSSGDMDVLLThpsftsestklLHQVVEQLQKVH-----FITDTLSKG----- 219  
 DSSP ---1EELLEEEEE1111111111HHHHHHHHHHLL-----LEEEEEEL-----

DSSP LLEEEEEEEEL--LEEEEEEEEEELLLLL1111eeee1hhhh11111eeee11  
 Query VKPRRFTAkLSYR--GRAFATVPIEVSSVEAGNAdqfdtlttsdalglvgvpaavavpcxt 180  
 ident | |  
 Sbjct ETKFMGVCQLPSKndEKEYPHRRIDIRLIPKDQY----- 253  
 DSSP LLEEEEEELLLLL11LLLLLLEEEEEELHHHH-----

DSSP hHHHHhhhhhh1111111111hhhhHHHHHH-----hhl  
 Query iPWQIaqk1havtavlepkandrahd1vDLQLE-----gll 218  
 ident  
 Sbjct yCGVL-----yftgSDIFNKnmrahalekgftineytirplgvtg 293  
 DSSP hHHHH-----hhlLHHHHHHhhhhhh11leell11leell1111

DSSP 1hhhhhhhhHHHHhhhhhh1111LLLLL1111hhhhhhhh1111111111hhhhhhh  
 Query ldadlxptrSACIaifearaqhpWPPRVatlphwpliyagalegldhlelartvdaaaqa 278  
 ident |  
 Sbjct vageplpvdSEKD-----ifdYIQWK----- 314  
 DSSP 11111111LHHH-----hHHLLLL-----

DSSP hhhhhhhhh1111  
 Query vqrfvaridratkr 292  
 ident  
 Sbjct ----yrepkdrse 323  
 DSSP ----111hh111

No 35: Query=mol1A Sbjct=1zqzA Z-score=7.3

[back to top](#)

```
DSSP -----111111111hhhhhhhhhhhh1111hhhh
Query -----aapyspntlrsldrirtqvaerqgvvfgrrlq 33
ident
Sbjct ddtsssinfltrvtgigpsaarklvdegiktledlrknedklnhhqriglkyfedfekri 60
DSSP 111hhhhhhhh111111hhhhhhhhhh1111hhhhhh11hh11hhhhhhhh111hhhlle

DSSP HHHHHHHHHHHH-LLLL11LLLLLEEEHHHHHHHHhh11111LLLLLEEEEL-----
Query RHVAXIVVAQFAA-TLTDdtGAPLLLVKGGSSLELrrgipdsrTSKDFATVAR----- 85
ident
Sbjct PREEMLMQDIVLnEVKk1dPEYIATVCGSFRRGA-----eSSGDMVLLThpntse 113
DSSP EHHHHHHHHHHHHHHHHHH11111LLLLLEEEELLLLLL-----IEELLEEEEEE111111

DSSP -----1LHHHHHHHHHHHHhh1111eeEELLEEL11111LLLLLEEEEEEELLeEEE
Query -----rDIELIHEQLADAGetgwegftAIFTAPEEiaapgxpvKPRRFTAKLSYRGrAFA 140
ident
Sbjct sskqpkLLHRVVEQLQKVR-----FITDTLSKG-----ETKFMGVCQLPSEN-EYP 158
DSSP 1111hhHHHHHHHHHHLL-----LEEEEEEL-----LLEEEELLLLLL-LLL

DSSP EEEEEEEELLLLL111eeeee1hhhh111111eeeee1hhHHHHhhhhhh111111
Query TVPIEVSSVEAGNAdqfdtltsdalglvgvpaavavpcxtiPWQIaqlhvtavleepk 200
ident
Sbjct HRRIDIRLIPKDQY-----yCGVL----- 177
DSSP LEEEEEEELLHHHH-----hHHHH-----

DSSP 1111hhhhHHHHHH-----hh11hhhhhhHHHHhhhhhh1
Query andrahdlvDLQLE-----g111dadlxptrSACIaifeara 238
ident
Sbjct -----yftgSDIFNkmrahalekgftineyrtirplgtgvageplpvdSEQD----- 225
DSSP -----h111LHHHHHHhhhhhhhh11ee1111ee1111111111111LHHH-----

DSSP 111LLLLL11111hhhhhhhhhh1111111111hhhhhhhhhhhhhhhhhh1111
Query qhpWPRVat1phwpliyagalegldhlelartvdaaaqavqrfvaridratkr 292
ident
Sbjct ifdYIQWR-----yrepkdrse 242
DSSP hhhHLLL-----111hhhh11
```

No 36: Query=mol1A Sbjct=4r66A Z-score=7.3

[back to top](#)

```
DSSP -----
Query ----- 0
ident
Sbjct tlnggitdmltelanfeknvsqaihkynayrkaasviakypkiksgaeakklpgvgtki 60
DSSP 111hhhhhhhhhhhhhhhh111hhhhhhhhhhhhhhhh1111111hhhhhh11111hh

DSSP -----111111111hh
Query -----aapyspntlrs 12
ident
Sbjct aekideflatgklrklekirqddtsssinfltrvsgigpsaarkfvdegiktledlrkne 120
DSSP hhhhhhhhh111hhhhhhhh1hhhhhhhh1111111hhhhhhhh11111hhhhhh11h

DSSP hhhhhhhhhhh1111hhhhhhHHHHHHHHHHHH-LLLL11LLLLLEEEHHHHHHHHhh11
Query slrdlirtqvaerqgvvfgrrlqRHVAXIVVAQFAA-TLTDdtGAPLLLVKGGSSLELrrgi 71
ident
Sbjct dklnhhqriglkyfgdfekriPREEMLMQDIVLnEVKkVdSEYIATVCGSFRRGA---- 176
DSSP h111hhhhhhhh11hhhhhh11eHHHHHHHHHHHHHHHHHH1111111111111111L-----

DSSP 1111LLLLLEEEEL-----1LHHHHHHHHHHHHhh1111eeEELLEEL1111
Query pdsrTSKDFATVAR-----rDIELIHEQLADAGetgwegftAIFTAPEEiaap 119
ident
Sbjct ---eSSGDMVLLThpsfetskqpkLLHQVVEQLQKVH-----FITDTLSK---- 221
DSSP ---IEELLEEEEEE1111111111111111HHHHHHHHHHLL-----LEEEEEEE----
```

DSSP 111LLEEEEEEEEL--LEEEEEEEEEEEL-LLLL1111eeeeehhhh11111lee  
Query gxpVKPRRFTAKLSYR--GRAFATVPIEVSSV-EAGNadqfdtltsdalglvgvpaavav 176  
ident  
Sbjct --gETKFMGVCQLPSKndEKEYPHRRIDIRLIpKDQY----- 256  
DSSP --1LLEEEEEELLLL11LLLLLEEEEEEEEL1HHHH-----

DSSP eel1hHHHHhhhhhhhh1111111111HHHH-----hhhhhhh  
Query pcxtiPWQIaqk1havtavleekandraHDLV-----dlqllegl 217  
ident  
Sbjct ---yCGVL-----yftgSDIFnknmrahalekgftinkytirplgvtg 296  
DSSP ---hHHHH-----hhh1LHHHHhhhhhhhh1111ee1111ee1111

DSSP 1hhHHHHhhHHHHhhhhhh111L11111111hhhhhhhh1111111111hhhhhh  
Query 1ldaDLXPtrSACIAifearaqhWPPRVat1phwplyagalegldhlelartvdaaaq 277  
ident  
Sbjct vagePLPV--DSEKD-----ifdYIQWK----- 317  
DSSP 1111LLL--LLHHH-----hhhLLLL-----

DSSP hhhhhhhhhhh1111  
Query avqravaridratkr 292  
ident  
Sbjct -----yrepkdrse 326  
DSSP -----111hh111

No 37: Query=mol1A Sbjct=4ny8A Z-score=7.3

[back to top](#)

DSSP ----- 0  
Query -----  
ident  
Sbjct lnggitdmltelanfeknvsqaihkynayrkaasviakypkhkiksgaeaklpgvgtkia 60  
DSSP 11hhhhhhhhhhhhhhhh1111hhhhhhhhhhhhhh11111111hhhh111111hhhh

DSSP -----111111111hhh  
Query -----aapyspntlrs 13  
ident  
Sbjct ekideflatgklrklekirqddtssinfltrvsgigpsaarkfvdegiktleldrkned 120  
DSSP hhhhhhhhh111hhhhhhhh11hhhhhhhh11111111hhhhhhhh1111hhhhhhhh

DSSP hhhhhhhhhhh1111hHHHHHHHHHHHHHHHHHH--LLL11LLEEEHhhhhhh111  
Query lrdrltqaerqgvfGRLQRHVXIVVAQFAA-TLTDdtGAPLLLVKGGSSLELrrgip 72  
ident  
Sbjct klnhhqriglkyfgdfEKRIPREEMLQMQDIVLnEVKKvdSEYIATVCGSFRRGA----- 175  
DSSP h11hhhhhhhh11hhhhLLEEHhhhhhhhhhhhhhhhhhh1LLEEEELHHHHLLL-----

DSSP 111LLEEEEEEL-----1LHHHHHHHHHHHHhh1111eeEEELLEEL11111  
Query dsrTSKDFATVAR-----rDIELIHEQLADAGetgwegftAIFTAPEEIAapgxp 122  
ident  
Sbjct --eSSGDMVLLThpsftsesqpkLLHQVVEQLQKVH-----FITDTLSKG----- 219  
DSSP --1EELLEEEEE1111111111HHHHHHHHHHLL-----LEEEEEEL-----

DSSP LLEEEEEEEEL--LEEEEEEEEEEELLLL1111eeeeehhhh11111eeee11  
Query VKPRRFTAKLSYR--GRAFATVPIEVSSVEAGNadqfdtltsdalglvgvpaavpcxt 180  
ident  
Sbjct ETKFMGVCQLPSKndEKEYPHRRIDIRLIpKDQY----- 253  
DSSP LLEEEEEELLLL11LLLLLEEEEEEEELHHHH-----

DSSP hHHHHhhhhhhhh1111111111hhhhHHHHHH-----hh11  
Query iPWQIaqk1havtavleekandrahd1vDLQLE-----gl11 219  
ident  
Sbjct yCGVL-----yftgSDIFNknmrahalekgftineytirplgvtg 293  
DSSP hHHHH-----hhh1LHHHHhhhhhhhh1111ee1111ee1111

DSSP hhhhhhhHHHHhhhhhh1111L1111111hhhhhhhh1111111111hhhhhhhh  
Query dadlxptRSACIAifearaqhWPPRVAt1phwplyagalegldhlelartvdaaaqav 279  
ident

Sbjct vageplpVDSEK-----difDYIQWK----- 314  
DSSP 11111111LLHH-----hhHLLLLL-----

DSSP hhhhhhhh1111  
Query qrfvaridratkr 292  
ident  
Sbjct ----yrepkdrse 323  
DSSP ----111hhh111

No 38: Query=mol1A Sbjct=4ppxA Z-score=7.3

[back to top](#)

DSSP -----  
Query ----- 0  
ident  
Sbjct etlnggitdmltelanfeknvsqaihkynayrkaasviakyphkiksgaeakklpvggtk 60  
DSSP 1111hhhhhhhhhhhhhhhh1111hhhhhhhhhhhhhhhh11111111hhhh111111hh

DSSP -----111111111h  
Query -----aapyspntnl 11  
ident  
Sbjct iaekideflatgklrklekirqddtssinfltrvsgigpsaarkfvdegiktledlrkn 120  
DSSP hhhhhhhhhhh111hhhhhhhh1hhhhhhhh111111hhhhhhhh1111hhhh11

DSSP hhhhhhhhhhh1111hHHHHHHHHHHHHHHHHHHH-LLLL11LLLLEEEHHHHHHhh1  
Query rslrdrltqvaerqgvfgrLQRHVAXIVVAQFAA-TLTDdtGAPLLLKGGSSLELrgr 70  
ident | |  
Sbjct edklnhhqrigrlykfygdfekRIPREMLQMDDIVLnEVKKvdSEYIATVCGSFRGA--- 177  
DSSP hhh11hhhhhhhh1hhhh1LLEEHHHHHHHHHHHHHHHHHH1LLEEEELHHHHLLL---

DSSP 11111LLLLEEEEL-----1LHHHHHHHHHHHHhh1111eeEELLEEL11111  
Query ipdsrTSKDFATVAR-----rDIELIHEQLADAGetgwegftAIFTAPEEiaapgx 122  
ident | | | |  
Sbjct ----eSSGDMDVLLThpsftseskLLHQVVEQLQKVH-----FITDTLSKG----- 219  
DSSP ----1EELLEEEEEE111111111HHHHHHHHHHHLL-----LEEEEEEEL-----

DSSP LLEEEEEEEEL1eEEEEEEEEEEL-LLLL1111eese1hhhh11111eeseelh  
Query VKPRRFTAKLSYRgrAFATVPIEVSSV-EAGNadqfdtlttsdalglvgvpaavapcxti 181  
ident | |  
Sbjct ETKFMGVCQLPSK--EYPHRRIDIRLIpKDQY-----y 250  
DSSP LLEEEEEELLLL--LLEEEEEEEEL1HHHH-----h

DSSP HHHHhhhhhh111111111111hhhhHHHHHH-----h111hhhhh  
Query PWQIaqk1havtavlepkandrahd1vDLQLE-----g11dad1x 224  
ident  
Sbjct CGVL-----yftgSDIFNKnrahalekgftinkytirplagepl 290  
DSSP HHHH-----h111LHHHHHHhhhhhh1111ee1111ee111111

DSSP hhhHHHHhhhh1111LLL11111hhhhhhhh1111111111hhhhhhhhhh  
Query ptrSACIaifearaqhpWPPRVat1phwpliyagalegldhlelartvdaaqaqrfva 284  
ident |  
Sbjct pvdSEKD-----ifdYIQWK-----y 306  
DSSP 111LHHH-----hhHLLLL-----1

DSSP hhh1111  
Query ridratkr 292  
ident  
Sbjct repkdrse 314  
DSSP 11hhh111

No 39: Query=mol1A Sbjct=4tupA Z-score=7.2

[back to top](#)

DSSP -----







ident |  
Sbjct -----yCGVL-----yftgSDIFnknmrahalekgftineytirplgvt 296  
DSSP -----hHHHH-----hhhLHHHHhhhhhhhhhh1leeellleeellll

DSSP h11hhHHHHhhHHHHhhhhhh111LLLLL11111hhhhhhhhhh111111111hhhhh  
Query 111daDXLPtrSACIAifearaqhPWPPRvatlphwpliyagaleglhdhlelartvdaaa 276

ident |  
Sbjct gvagePLPV--DSEKD----ifdYIQWK----- 318  
DSSP 11111LLLL--LLHHH-----hhhHLLL-----

DSSP hhhhhhhhhhh1111  
Query qavqrfvaridratkr 292  
ident |  
Sbjct -----yrepkdrse 327  
DSSP -----111hhhh111

No 42: Query=mol1A Sbjct=4pgyA Z-score=7.2

[back to top](#)

DSSP -----  
Query ----- 0  
ident |  
Sbjct pqetlnggitdmltelanfeknvsqaihknayrkaasviakypkiksgaeakklpgvg 60  
DSSP 111111hhhhhhhhhhhhhhhhhh1111hhhhhhhhhhhhhhhh11111111hhhh111111

DSSP -----111111111  
Query -----aapysppt 9  
ident |  
Sbjct tkiaekideflatgklrklekirqddtsssinfltrvsgigpsaarkfvdegiktledlr 120  
DSSP hhhhhhhhhhhhh111hhhhhhhhhhhhhhhhhh111111hhhhhhhhhh1111hhhhhh

DSSP lhhhhhhhhhhhhhh111hhhhhhHHHHHHHHHHHHH-LLLL111LLEEEHHHHHHHHH  
Query nlrslrdrltqaerqgvfgrlqRHXIVVAQFAA-TLTDdtGAPLLLVKGGSSLELr 68  
ident | |  
Sbjct knedklnhhqrigkyfgdfekriPREEMLMQMDIVLnEVKKvdSEYIATVCGSFRRGA- 179  
DSSP hlhhh11hhhhhhhh1hhhhhh11eHHHHHHHHHHHHHHHHHH1LLEEEELHHHHLLL-

DSSP h111111LLEEEEL-----1LHHHHHHHHHHHHhh1111eeEEELLLEE111  
Query rgipdsrTSKDFATVAR-----rDIELIHEQLADAGetgwegftAIFTAPEEiaa 118  
ident | | | |  
Sbjct -----eSSGDMVLLThpsftsesqpkLLHQVVEQLQKVH-----FITDTLSK--- 222  
DSSP -----1EELLEEEEEE1111111111HHHHHHHHHHHLL-----LEEEEEE---

DSSP 1111LLEEEEEEEL--LEEEEEEELLLLLL111eeeee1hhhh1111lee  
Query pgxpVKPRRFTAKLSYR--GRAFATVPIEVSSVEAGNadqfdtltaldglvgvpaavav 176  
ident | |  
Sbjct ---gETKFMGVCQLPSKndeKEYPHRRIDIRLIPKDQY----- 257  
DSSP ---1LLEEEEEE1111111111LLEEEEEEELHHHH-----

DSSP eellHHHHhhhhhhhh1111111111HHHH-----hhhhhhh  
Query pcxtiPWQIaqk1havtavleepkandraHDLV-----dlqllegl 217  
ident |  
Sbjct -----yCGVL-----yftgSDIFnknmrahalekgftineytirplgvtg 297  
DSSP -----hHHHH-----hhhLHHHHhhhhhhhhhh1leeellleeellll

DSSP 11hhHHHHhhHHHHhhhhhh111LLLLL11111hhhhhhhhhh111111111hhhhhh  
Query 11daDXLPtrSACIAifearaqhPWPPRvatlphwpliyagaleglhdhlelartvdaaaq 277  
ident |  
Sbjct vagePLPV--DSEKD----ifdYIQWK----- 318  
DSSP 1111LLLL--LLHHH-----hhhHLLL-----

DSSP hhhhhhhhhhh1111  
Query avqrfvaridratkr 292  
ident |  
Sbjct -----yrepkdrse 327  
DSSP -----111hhhh111

No 43: Query=mol1A Sbjct=5dbbA Z-score=7.2

[back to top](#)

```
DSSP -----
Query ----- 0
ident
Sbjct pqetlnggitdmltelanfeknvsqaihkynayrkaasviakyphkiksgaeakklpgvg 60
DSSP 11hhhhhhhhhhhhhhhhhhhh1111hhhhhhhhhhhhhhhh11111111hhhh111111

DSSP -----11111111
Query -----aapysp 9
ident
Sbjct tkiaekideflatgklrklekirqddtsssinftrvsgigpsaarkfvdegiktledlr 120
DSSP hhhhhhhhhhhhh111hhhhhhhhhhhhhhhh11111111hhhhhhhhhh11111hhhhh

DSSP 1hhhhhhhhhhhhhh111hhhhhhHHHHHHHHHHHHHH-LLLL11LLLLEEEHHHHHHHH
Query nlrslrdrltqvaerqgvfgrlqRHVAXIVVAQFAA-TLTDdtGAPLLLVKGGSSLELr 68
ident | |
Sbjct knedklnhhqriglkyfgdfekriPREEMLQMQRDIVLnEVKKvdSEYIATVCGSFRRGA- 179
DSSP hlhhh11hhhhhhhh11hhhh11leHHHHHHHHHHHHHHHHHH11LLLLEEEELHHHHLLL-

DSSP h111111LLLLEEEEL-----1LHHHHHHHHHHHHhh1111eeEEELLLEE11
Query rgipdsrTSKFATVAR-----rDIELIHEQLADAGetgwegftAIFTAPEEiaa 118
ident | | | |
Sbjct -----eSSGDMDVLLThpsftsesqpkLLHQVVEQLQKVH-----FITDTLSK--- 222
DSSP -----1EELLEEEEEE1111111111HHHHHHHHHHHLL-----LEEEEEE---

DSSP 1111LLLLEEEEEEEL--EEEEEEEEEEEL-LLLL1111eeeee1hhhh11111ee
Query pgxpVKPRRFTAKLSYRG--RAFATVPIEVSSV-EAGNadqfdtltsdalglvgpaava 175
ident | |
Sbjct ---gETKFMGVCQLPSKNdeKEYPHRRIDIRLIpKDQY----- 257
DSSP ---1LLEEEEEE1111111111LLLLEEEEEEEL1HHHH-----

DSSP eeellHHHHhhhhhhhh1111111111HHHH-----hhhhhh
Query vpcxtiPQWQIaqklhavtavlepkandraHDLV-----dlqlleg 216
ident |
Sbjct -----yCGVL-----yftgSDIFnknmrahalekgftineytirplgvt 296
DSSP -----hHHHH-----hhh1LHHHHhhhhhhhhhh11eeel11lee1111

DSSP h11hhHHHHhhHHHHhhhhhh111LLL11111hhhhhhhhhh1111111111hhhhh
Query 111daDLXPtrSACIAifearaqhPWPPRvatlphwpliyagalegldhlelartvdaaa 276
ident |
Sbjct gvagePLPV--DSEKD-----ifdYIQWK----- 318
DSSP 11111LLL--LHHH--hhHLLL

DSSP hhhhhhhhhhh1111
Query qavqrvaridratkr 292
ident
Sbjct -----yrepkdrse 327
DSSP -----111hh111
```

No 44: Query=mol1A Sbjct=5j0oA Z-score=7.2

[back to top](#)

```
DSSP -----
Query ----- 0
ident
Sbjct pqetlnggitdmltelanfeknvsqaihkynayrkaasviakyphkiksgaeakklpgvg 60
DSSP 111111hhhhhhhhhhhhhhhhhh1111hhhhhhhhhhhhhhhh11111111hhhh111111

DSSP -----11111111
Query -----aapysp 9
ident
Sbjct tkiaekideflatgklrklekirqddtsssinftrvsgigpsaarkfvdegiktledlr 120
```

```

DSSP hhhhhhhhhhhh111hhhhhhhhhh111hhhhhhhh111111hhhhhhhh11111hhhh
DSSP 1hhhhhhhhhh1111hhhhHHHHHHHHHHHHH-LLLL111LLEEEEEHHHHHHHHh
Query nlrs1rdrltqvaerqgvfgrlqRHVAXIVVAQFAA-TLTDdtGAPLLLVKGGSSLELr 68
ident
Sbjct knedklnhhqriglkyfgdfekriPREEMLQMQDIVLnEVKkvdSEYIATVCGSFRRGA- 179
DSSP 11hhh11hhhhhhhh11hhhh111eHHHHHHHHHHHHH111LLEEEEELLLLL--

DSSP h111111LLEEEEL-----1LHHHHHHHHHHHHhh111leeEELLEE111
Query rgipdsrTSKDFATVAR-----rDIELIHEQLADAGetgwegftAIFTAPEEiaa 118
ident
Sbjct -----eSSGDMVLLThpsftsesqpkLLHQVVEQLQKVH-----FITDTLSK--- 222
DSSP -----1EELLEEEEE1111111111HHHHHHHHHHHLL-----LEEELLEE---

DSSP 1111LLEEEEEEEEL--LEEEEEEEL-LLLL1111eeee1hhhh1111lee
Query pgxpVKPRRFTAKLSYR--GRAFATVPIEVSSV-EAGNadqfdtltsdalglvqpaava 175
ident
Sbjct ---gETKFMGVCQLPSKndEKEYPHRRIDIRLIpKDQY----- 257
DSSP ---1LLEEEELLLL1111111111LLEEEEL1HHHH--

DSSP eeellHHHHhhhhhhh1111111111HHHH-----hhhhhhh
Query vpcxtiPWQIaqlh'avtavleepkandraHDLV-----dlqlleg 216
ident
Sbjct ----yCGVL-----yftgSDIFnknmrahalekgftineytirplgvt 296
DSSP ----hHHHH-----h111LHHHHhhhhhhhhhleeel11lee111

DSSP h11hhHHHHhhHHHHhhhhh111LLLLL11111hhhhhhhh111111111hhhh
Query 111daDXPTrSACIAifearaqhPWPRvatlphwpliyagalegldhlelartvdaaa 276
ident
Sbjct gvagePLPV--DSEKD----ifdYIQWK----- 318
DSSP 11111LLL--LHHH--hHHLLL-----

DSSP hhhhhhhhhh1111
Query qavqrfvaridratkr 292
ident
Sbjct -----yrepkdrse 327
DSSP -----111hhhh11

```

No 45: Query=mol1A Sbjct=3uxnA Z-score=7.2

[back to top](#)

```

DSSP ----- 0
Query -----
ident
Sbjct tlnggitdmlvelanfeknvsqaihknayrkaasviakyphkiksgeakklpgvgtki 60
DSSP 1111hhhhhhhhhhhhhh111hhhhhhhhhhhhhhhhhh1111111111111111hhhh

DSSP -----111111111hh
Query -----aapyspsptnlr 12
ident
Sbjct aekideflatgklrklekirqddtsssinfltrvtgigpsaarklvdegiktlelrlkne 120
DSSP hhhhhhhhh111hhhhhh111hhhhhhhh111111hhhhhhhh11111hhhh111h

DSSP hhhhhhhhhhh1111hhhhHHHHHHHHHHHHH-LLLL111LLEEEEEHHHHHHHHh11
Query slrdrltqvaerqgvfgrlqRHVAXIVVAQFAA-TLTDdtGAPLLLVKGGSSLELrgi 71
ident
Sbjct dklnhhqriglkyfedfekriPREEMLQMQDIVLnEVKk1dPEYIATVCGSFRRGA---- 176
DSSP hhh1hhhhhhhh11hhhh111eHHHHHHHHHHHHHHHHHH111LLEEEELHHHHLL--

DSSP 1111LLEEEEL-----1LHHHHHHHHHHHHhh111leeEELLEE111
Query pdsrTSKDFATVAR-----rDIELIHEQLADAGetgwegftAIFTAPEEiaap 119
ident
Sbjct ---eSSGDMVLLThpnftsesskqpkLLHRVVEQLQKVR-----FITDTLSKG--- 222
DSSP ---1EELLEEEEE11111111111hHHHHHHHHHHHLL-----LEEELLEE---

DSSP 111LLEEEEEEEELLE--EEEEEEEEL-LLLL1111eeee1hhhh1111lee

```

Query gxpVKPRRF**TAKLSYRGR**--AFATVPIEVSSV-EAGNadqfdtlttsdalglvgvpaavav 176  
ident | |  
Sbjct ---ETKFMGVCQLPSENDenEYPHRRIDIRL**IpKDQY**----- 256  
DSSP ---LLEEEEEELLLLLL1111LLEEEEEEL1HHHH-----

DSSP ee11hHHHHhhhhhhh1111111111hHHHHH-----  
Query pcxtiPWQ**Iaqk**lhavtavleepkandrahdLvDLQLE----- 215  
ident  
Sbjct ---yCGVL-----yftgSDIFNKmrahalekgftineytirpl 292  
DSSP ---hHHHH-----hhhLHHHHhhhhhh1111ee1111ee1

DSSP hh11hhhhhhHHHHhhhhhh1111LLLLL11111hhhhhhhh1111111111hhhh  
Query g11dadlxptRSACIaifearaqhp**WPPRV**at1phwpli<sup>g</sup>al<sup>e</sup>gldhle<sup>l</sup>artv<sup>daa</sup> 275  
ident  
Sbjct gvtgvageplpVDSEQ-----di**fDYIQW**----- 316  
DSSP 1111111111LHH-----hhHHLHL

DSSP hhhhhhhhhhh1111  
Query aqavqrfvaridratkr 292  
ident  
Sbjct -----ryrepkdrs 325  
DSSP -----1111hhhh11

### No 46: Query=mollA Sbjct=3uxoA Z-score=7.2

[back to top](#)

DSSP -----  
Query ----- 0  
ident  
Sbjct **tlnggitdmlvelanf**ekvnsqaihkynayrkaasviakyphkiksgaeakklpgvgtki 60  
DSSP 111hhhhhhhhhhhhhh1111hhhhhhhhhhhhhh111111hhhhhh11111hh

DSSP -----111111111hh  
Query -----aapysspptnlr 12  
ident  
Sbjct aekideflatgklrklekirqddtssinfltrvtgigpsaarklvdegiktledlrkne 120  
DSSP hhhhhhh11111hhhhhhhh11hhhhhhhh111111hhhhhhhh11111hhhh111h

DSSP hhhhhhhhhhh1111hhhhHHHHHHHHHHHH-LLLL11LLEEEHHHHHHhh11  
Query slrdrлтqvaerqgvfgrlqRHVAXIVVAQFAA-TLTDdtGAPLLL**VKGGSSLE**Lrrgi 71  
ident | |  
Sbjct dklnhhqriglkyfedfekriPREEMLQM**QDIVL**nEVKKIdPEYIATVCGSFRRGA---- 176  
DSSP hh11hhhhhhhh11hhhh11eEHHHHHHHHHHHHHHHH1LLEEEELHHHHLL----

DSSP 1111LLEEEEEEL-----1LHHHHHHHHHHHHhh1111eEELLEEL111  
Query pdsrTSKDFATVAR-----rDIELIHEQLADAGetgwegftAIFTAPEEIaap 119  
ident | | | |  
Sbjct ---eSSGDMDVLLThpnftsesskqpkLLHRVVEQLQKVR-----FITDTLSKG--- 222  
DSSP ---1EELLEEEEE1111111111hhHHHHHHHHHHLL-----LEEEEEEL---

DSSP 111LLEEEEEEEELLE--EEEEEEEEEL-LLLL1111eeeee1hhhh11111ee  
Query gxpVKPRRF**TAKLSYRGR**--AFATVPIEVSSV-EAGNadqfdtlttsdalglvgvpaavav 176  
ident | |  
Sbjct ---ETKFMGVCQLPSENDenEYPHRRIDIRL**QpKDQY**----- 256  
DSSP ---LLEEEEEELLLLLL11LLEEEEEEL1HHHH-----

DSSP ee11hHHHHhhhhhhh1111111111hHHHHH-----hhh  
Query pcxtiPWQ**Iaqk**lhavtavleepkandrahd**LDVLD**Q-----1leg 216  
ident  
Sbjct ---yCGVL-----yftgSDIFNKmrahalekgftineytirplgvt 295  
DSSP ---hHHHH-----hhhLHHHHhhhhhh111ee1111ee1111

DSSP h11hHHHHhhHHHHhhhhhh1111LLLLL1111hhhhhhhh1111111111hhhh  
Query 111dADLXptRSACIaifearaqhp**WPPRV**at1phwpli<sup>g</sup>al<sup>e</sup>gldhle<sup>l</sup>artv<sup>daa</sup> 276  
ident |  
Sbjct gvagEPLP--VDSEQ-----di**fDYIQW**----- 316  
DSSP 1111LLL--LLHH-----hhHHLHL



DSSP hhhhhhhhhhh1111  
Query qavqrfvaridratkr 292  
ident  
Sbjct -----ryrepkdrs 325  
DSSP -----1111hhhl1

No 47: Query=mol1A Sbjct=1tv9A Z-score=7.2

[back to top](#)

DSSP -----  
Query ----- 0  
ident  
Sbjct kapqetlnggitdmltelanfeknvsqaihkynayrkaasviakyphkiksgaeakklpg 60  
DSSP 1111hhhhhhhhhhhhhhhhhhhh1111hhhhhhhhhhhhhhhhhh111111hhhhhh1111

DSSP -----1111111  
Query -----aapyssp 7  
ident  
Sbjct vgtkiaekideflatgklrklekirqddtsssinfltrvsgigpsaarkfvdegiktled 120  
DSSP 11hhhhhhhhhhhh111hhhhhhhh1hhhhhhhh111111hhhhhhhh11111hhhh

DSSP 111hhhhhhhhhhhh1111hhhhHHHHHHHHHHHHHH-LLLL11LLLLEEEHHHHHH  
Query ptnlrslrdr1tqvaerqgvfgrlqRHVAXIVVAQFAA-TLTDdtGAPLLLVKGGSSLE 66  
ident | |  
Sbjct lrknedklnhhqriglkyfgdfekriPREEMLMQDIVLnEVKKvdSEYIATVCGSFRRG 180  
DSSP hhh1hh11hhhhhhhh1hhhhhh1eEHHHHHHHHHHHHHHHHHH11LLEEEELHHHHLL

DSSP Hhh111111LLLLEEEEEE-----1LHHHHHHHHHHHHhh1111eeEEELLLE  
Query LrrgipdsrTSKDFATVAR-----rDIELIHEQLADAGetgwegftAIFTAPE 114  
ident | | | |  
Sbjct A-----eSSGDMDVLLThpsftsestkqpkLLHQVVEQLQKVH-----FITDTLS 225  
DSSP L-----1EELLEEEEEE1111111111hhHHHHHHHHHHLL-----LEEEEEE

DSSP EL111111LLLLEEEEEEEL--LEEEEEEEL-LLL1111eeeee1hhhh1111  
Query E1aapgxPKPRRFTAKLSYR--GRAFATVPIEVSSV-EAGNadqfd1tsdalglvgvp 171  
ident | |  
Sbjct KG-----ETKFMGVCQLPSKndEKEYPHRRIDIRLlpKDQY----- 261  
DSSP EL-----LLEEEEEE1111111111LLLLEEEEEEEL1HHHH-----

DSSP 1leeeel1hHHHHhhhhhh1111111111HHHHHHHH-----  
Query aavavpcxtiPWQIaqklhavtavleekandraHDLVDLQL----- 213  
ident |  
Sbjct -----yCGVL-----yftgSDIFNKNMrahalekgftineytirp 296  
DSSP -----hHHHH-----hhh1LHHHHHHhhhhhh1leeel111lee

DSSP -hhhh1hHHHHhhHHHHhhhhhh1111LLL11111hhhhhhhh1111111111h  
Query -leg111dADLXptRSACIaifearaqhpWPPRVat1phwpliyagalegl dhlelartv 272  
ident |  
Sbjct lgvtagvagEPLP--VDSEK-----difDYIQW----- 321  
DSSP 11111111LLL--LLHH-----hhHLLL-----

DSSP hhhhhhhhhhhhh1111  
Query daaaqavqrfvaridratkr 292  
ident  
Sbjct -----kyrepkdrse 331  
DSSP -----1111hhhl1

No 48: Query=mol1A Sbjct=3isca Z-score=7.2

[back to top](#)

DSSP -----  
Query ----- 0  
ident

Sbjct ppetlnggitdmltelanfeknvsqaihkynayrkaasviakypkiksgaeakklpgvg 60  
DSSP 11hhhhhhhhhhhhhhhhhhhh1111hhhhhhhhhhhhhhhh111111hhhhhh111111

DSSP -----11111111  
Query -----aapysppt 9  
ident

Sbjct tkiaekideflatgklrklekirqddtssinfltrvsgigpsaarkfvdegiktledlr 120  
DSSP hhhhhhhhhhhhh111hhhhhhhh1hhhhhhhh111111hhhhhhhh1111hhhhh

DSSP 1hhhhhhhhhhhh1111hhhhHHHHHHHHHHHH-LLLL11LLLEEEHHHHHHHH 68  
Query nlrslrdrltqvaerqgvfgrlqRHVAXIVVAQFAA-TLTDdtGAPLLLKGGSSLELr  
ident | |

Sbjct knedklnhhqriglkyfgdfekriPREEMLQMQDIVLnEVKKvdSEYIATVCGSFRRGA- 179  
DSSP 11hhh11hhhhhhhh1hhhh111eHHHHHHHHHHHHHHHHH11LLEEEELHHHHLL-

DSSP h111111LLLEEEEL-----1LHHHHHHHHHHhh1111eeEEELLEEL11  
Query rgipdsrTSKDFATVAR-----rDIELIHEQLADAGetgwegftAIFTAPEEIaa 118  
ident | |

Sbjct -----eSSGMDVLLThpsftsesqpkLLHQVVEQLQKVH-----FITDTLSKG-- 223  
DSSP -----1EELLEEEEEE1111111111HHHHHHHHHHLL-----LEEEEEEEL--

DSSP 1111LLLEEEEEEEL--EEEEEEEEEEEL-LLLL1111eeee1hhhh111111ee  
Query pgxpVKPRRFTAKLSYRG--RAFATVPIEVSSV-EAGNadqfdtltsdalglvgvpaava 175  
ident | |

Sbjct ----ETKFMGVCQLPSKNdeKEYPHRRIDIRLIpKDQY----- 257  
DSSP ----LLEEEEEE1111111111LLLEEEEEEEL1HHHH-----

DSSP ee11hHHHHhhhhhh1111111111hhhhHHHHHH-----  
Query vpcxtiPWQIaqlhavlavlepkandrahdlvDLQLE----- 215  
ident

Sbjct ----yCGVL-----yftgSDIFNKnmrahalekgftineytirp 292  
DSSP ----hHHHH-----hhh1LHHHHhhhhhhhh1lee1111ee

DSSP --hh11hhhhhhhhHHHHhhhhhh1111LLLL1111hhhhhhhh1111111111hh  
Query --gllldadlxptrSACIaifearaqhpWPPRVatlpwplyagaleglhdhleartvd 273  
ident |

Sbjct lgvgtvageplpvdSEKD-----ifdYIQWK----- 318  
DSSP 111111111111LHHH-----hhhLLLL-----

DSSP hhhhhhhhhhhhh1111  
Query aaaqavqrfvaridrskr 292  
ident  
Sbjct -----yrepkdrse 327  
DSSP -----111hh111

No 49: Query=mol1A Sbjct=3isbA Z-score=7.2

[back to top](#)

DSSP -----  
Query ----- 0  
ident

Sbjct ppetlnggitdmltelanfeknvsqaihkynayrkaasviakypkiksgaeakklpgvg 60  
DSSP 11hhhhhhhhhhhhhhhhhhhh1111hhhhhhhhhhhhhhhh111111hhhhhh111111

DSSP -----11111111  
Query -----aapysppt 9  
ident

Sbjct tkiaekideflatgklrklekirqddtssinfltrvsgigpsaarkfvdegiktledlr 120  
DSSP hhhhhhhhhhhhh111hhhhhhhh1hhhhhhhh111111hhhhhhhh1111hhhhh

DSSP 1hhhhhhhhhhhh1111hhhhHHHHHHHHHHHH-LLLL11LLLEEEHHHHHHHH 68  
Query nlrslrdrltqvaerqgvfgrlqRHVAXIVVAQFAA-TLTDdtGAPLLLKGGSSLELr  
ident | |

Sbjct knedklnhhqriglkyfgdfekriPREEMLQMQDIVLnEVKKvdSEYIATVCGSFRRGA- 179  
DSSP h1hhh11hhhhhhhh1hhhh111eHHHHHHHHHHHHHHHHH11LLEEEELHHHHLL-



DSSP hhLLLLL-----111hhh111

No 51: Query=mol1A Sbjct=1jn3A Z-score=7.2

[back to top](#)

DSSP -----111111111hhhhhhhhhhhhhh1111hhhhh  
 Query -----aapyspptnlrslrdrltqvaerqgvvfgrlq 33  
 ident  
 Sbjct ddtsssinfltrvtgigpsaarklvdegiktledlrknedklnhhqriglkyfedfekri 60  
 DSSP 1hhhhhhhh111111hhhhhhhh1111hhhh11hh11hhhhhhhh11hh11e

DSSP HHHHHHHHHHHH-LLLL11LLLLEEEEHHHHHHHHhh11111LLLLEEEEEL-----  
 Query RHVAXIVVAQFAA-TLTDdtGAPLLLVKGGSSLELrrgipdsrTSKDFATVAR----- 85  
 ident | | | |  
 Sbjct PREEMLMQDIVLnEVKKIdPEYIATVCGSFRRGA-----eSSGDMVLLThpnftse 113  
 DSSP EHHHHHHHHHHHHHHHHHH11LLEEEELHHHHLLL-----1EELLEEEEE111111

DSSP -----1LHHHHHHHHHHHHhh1111eeEEELLEEL11111LLEEEEEEEELLeEEE  
 Query -----rDIELIHEQLADAGetgwegftAIFTAPEEiaapgxPKPRRFTAKLSYRGrAFA 140  
 ident | | | | | | | | | |  
 Sbjct sskqpkLLHRVVEQLQKVR-----FITDTLSKG-----ETKFMGVCQLPSEN-EYP 158  
 DSSP 1111hhHHHHHHHHHHLLL-----LEEEEEEL-----LLEEEEEELLLL-LLL

DSSP EEEEEEEEL-LLLL1111eeeee1hhhh11111eeeee1hHHHHhhhhhh11111  
 Query TVPIEVSSV-EAGNadqfdlttsdalglvgvpaavavpcxtiPWQIaqlh'avtavleep 199  
 ident |  
 Sbjct HRRIDIRLIpKDQY-----yCGVL----- 177  
 DSSP LEEEEEEEL1HHHH-----hHHHH-----

DSSP 11111hhhhHHHHHH-----hh11hhhhhhhhHHHHhhhhhh  
 Query kandrahdlvDLQLE-----gllldadlxptrSACIaifear 237  
 ident |  
 Sbjct -----yftgSDIFNKnIrahalekgftineytirplgvtgvageplpvdSEQD----- 225  
 DSSP -----h111LHHHHHHhhhhhh11ee1111ee11111111111111LHHH-----

DSSP 1111LLLL11111hhhhhhhh1111111111hhhhhhhhhhhhhh111  
 Query aqhpWPPRVatIphwpliayagalegldhlelartvdaaaqavqrfvaridratr 292  
 ident  
 Sbjct -ifdYIQWR-----yrepkdrse 242  
 DSSP -hhhLLLL-----111hhh111

No 52: Query=mol1A Sbjct=2i9gA Z-score=7.2

[back to top](#)

DSSP -----  
 Query ----- 0  
 ident  
 Sbjct etlnggitdmltelanfekonvsqaihknayrkaasviakyphkiksgaeakklpgvgtk 60  
 DSSP 1111hhhhhhhhhhhhhh1111hhhhhhhhhhhhhh111111hhhh111111hh

DSSP -----111111111h  
 Query -----aapyspptnl 11  
 ident  
 Sbjct iaekideflatgklrklekirqddtsssinfltrvsgigpsaarkfvdegiktledlrkn 120  
 DSSP hhhhhhhhh111hhhhhh11hhhhhhhh111111hhhhhhhh1111hhhh11

DSSP hhhhhhhhhhh1111hhhhHHHHHHHHHHHHH-LLLL11LLLLEEEEHHHHHHHHh1  
 Query rslrdrltqvaerqgvvfgrlqRHVAXIVVAQFAA-TLTDdtGAPLLLVKGGSSLELrrg 70  
 ident | |  
 Sbjct edklnhhqriglkyfgdfekriPREEMLMQDIVLnEVKKvdSEYIATVCGSFRRGA--- 177  
 DSSP hhh11hhhhhhhh11hhhh11eHHHHHHHHHHHHHHHHHH11LLEEEELHHHHLLL---

DSSP 11111LLLLEEEEEL-----1LHHHHHHHHHHHHhh1111eeEEELLEEL1111  
 Query ipdsrTSKDFATVAR-----rDIELIHEQLADAGetgwegftAIFTAPEEiaapg 120

```

ident      | |
Sbjct ----eSSGDMVLLThpsftsesqpkLLHQVVEQLQKVH-----FITDTLSKG---- 221
DSSP ----1EELLEEEEE111111111hHHHHHHHHHHHLL-----LEEEEEEL----

DSSP 11LLEEEEEEEEEEL--LEEEEEEEEEELLLLLL11leeeelhhhh1111leeee
Query xpVKPRRFTAKLSYR--GRAFATVPIEVSSVEAGNAdqfdtltsdalglvgvpaavavpc 178
ident      | |
Sbjct --ETKFMGVCQLPSKndEKEYPHRRIDIRLIPKDQY----- 255
DSSP --LLEEEEEELLLLL11LLEEEEEELHHHH-----

DSSP 11hHHHHhhhhhhhh11111111111hhhhHHHHHH-----h
Query xtiPWQIaqlhavlavleekandrahdldDLQLE-----g 216
ident      |
Sbjct --yCGVL-----yftgSDIFNKnmrahalekgftineytirplgv 293
DSSP --hHHHH-----hhh1LHHHHhhhhhhhh1lee111lee111

DSSP h11hhhhhhhhHHHHhhhhhh1111LLELL11111hhhhhhhh111111111hhhhh
Query 11ldadlxptrSACIaifearaqhpWPPRVatlpwpliayaglegldhlelartvdaaa 276
ident      |
Sbjct tgvageplpvdSEKD-----ifdYIQWK----- 316
DSSP 1111111111LHHH-----hhHLLLL-----

DSSP hhhhhhhhhhh1111
Query qavqrvaridratkr 292
ident
Sbjct -----yrepkdrse 325
DSSP -----111hhhh111

```

No 53: Query=mol1A Sbjct=4o5cA Z-score=7.2

[back to top](#)

```

DSSP -----111111111
Query -----aapysspt 9
ident
Sbjct tkiaekideflatgklrklekirqddtssinfltrvsgigpsaarkfvdegiktledlr 120
DSSP hhhhhhhhhhh111hhhhhh11hhhhhhhh111111hhhhhhhh1111hhhh

DSSP 1hhhhhhhhhh111hhhhHHHHHHHHHHHH--LLLL11LLEEEEEHHHHHHH
Query nlrslrdrltqaerqgvfgrlqRHVAXIVVAQFAA--TLTDdtGAPLLLVKGGSSLELR 68
ident      | |
Sbjct knedklnhhqriglkyfgdfekriPREEMLMQMDIVLnEVKKvdSEYIATVCGSFRRGA-- 179
DSSP 11hhhh11hhhhhh11hhhh11leEHHHHHHHHHHHHHHHH1LLEEEEEELHHHHLL--

DSSP h111111LLEEEEEEL-----1LHHHHHHHHHHHHhh1111eeEEELLLEE111
Query rgipdsrTSKDFATVAR-----rDIELIHEQLADAGetgwegftAIFTAPEEiaa 118
ident      | |
Sbjct ----eSSGDMVLLThpsftsesqpkLLHQVVEQLQKVH-----FITDTLSK--- 222
DSSP ----1EELLEEEEE1111111111HHHHHHHHHHHLL-----LEEEEEEL----

DSSP 1111LLEEEEEEEEEEL--LEEEEEEEEEELLLLLL11leeeelhhhh1111leee
Query pgxpVKPRRFTAKLSYR--GRAFATVPIEVSSVEAGNAdqfdtltsdalglvgvpaavav 176
ident      | |
Sbjct ---gETKFMGVCQLPSKndEKEYPHRRIDIRLIPKDQY----- 257
DSSP ---1LLEEEEEELLLLL11LLEEEEEELHHHH-----

DSSP ee11hHHHHhhhhhhhh1111111111HHHH-----hhhhhhhh11
Query pcxtiPWQIaqlhavlavleekandraHDLV-----dlqllegl11 219
ident      |
Sbjct ----yCGVL-----yftgSDIFNknmrahalekgftineytirplgv 297
DSSP ----hHHHH-----hhh1LHHHHhhhhhhhh1lee111lee1111

```

DSSP hhhhhhhhhHHHHHHhhhhhh111LLLLL111111hhhhhhhhhh111111111hhhhhhhh 279  
 Query dadlxptrSACIAifearaqhPWPPRvatlphwpliyagalegldhlelartvdaaaqav  
 ident  
 Sbjct vageplpvDSEKD-----ifdYIQWK----- 318  
 DSSP 11111111LLHHH----hhhHLLL-----

DSSP hhhhhhhhh1111  
 Query qrfvaridratkr 292  
 ident  
 Sbjct ----yrepkdrse 327  
 DSSP ----111hh111

No 54: Query=mol1A Sbjct=5j0yA Z-score=7.2

[back to top](#)

DSSP -----  
 Query ----- 0  
 ident  
 Sbjct apqetlnggitdmltelanfeknvsqaihkynayrkaasviakyphkiksgaeakklpgv 60  
 DSSP 111hhhhhhhhhhhhhhhhhhhh111hhhhhhhhhhhhhhhh1111111hhhh11111

DSSP -----11111111  
 Query -----aapysspp 8  
 ident  
 Sbjct gtkiaekideflatgklrklekirqddtssinfltrvsgigpsaarkfvddegiktle 120  
 DSSP 1hhhhhhhhhhhh111hhhhhhhh1hhhhhhhh1111111hhhhhhhh11111hhhh

DSSP 11hhhhhhhhhhhh1111hhhhHHHHHHHHHHHHH-LLLL111LLEEEHHHHHHH  
 Query tnlrslrdrltqvaerqgvfgrlqRHXIVVAQFAA-TLTDdtGAPLLLVKGSSELEL 67  
 ident  
 Sbjct rknedklnhhqriglkyfgdfekriPREEMLQMQDIVLnEVKKvdSEYIATVCGSFRRGA 180  
 DSSP hh1hh11hhhhhhhh1hhhh11eEHHHHHHHHHHHHHHHHH1LLEEEELHHHHLL

DSSP hh111111LLEEEEL-----1LHHHHHHHHHHHHhh111eeEELLLEE111  
 Query rrgipdsrTSKDFATVAR-----rDIELIHEQLADAGetgwegftAIFTAPEEiaa 118  
 ident  
 Sbjct -----eSSGDMVLLThpsftsespkLLHQVVEQLQKVH-----FITDTLSK--- 222  
 DSSP -----1EELLEEEEEE111111111HHHHHHHHHHLL-----LEEEEEE---

DSSP 1111LLEEEEEEEL--LEEEEEEELLLL111111eeehhh111111lee  
 Query pgxpVKPRRFATAKLSYR--GRAFATVPIEVSSVEAGNAdqfdtlttsdalglvgpaavav 176  
 ident  
 Sbjct ---gETKFMGVCQLPSKndEKEYPHRRIDIRLIPKDQY----- 257  
 DSSP ---1LLEEEEEEELLLL111LLEEEEEEELHHH-----

DSSP eel1hHHHHhhhhhh1111111111HHHH-----hhhhhhh  
 Query pcxtiPWQIaqklhavtavlpepkandraHDLV-----dlq1legl 217  
 ident  
 Sbjct ----yCGVL-----yftgSDIFnknmrahaalekgftineytirplgvvtg 297  
 DSSP ----hHHHH-----h111LHHHHhhhhhh111ee111eeeee111

DSSP 11hhHHHHhhHHHHhhhh111LLLL111111hhhhhhhh111111111hhhhhh 277  
 Query lldaDLXPTrSACIAifearaqhPWPPRvatlphwpliyagalegldhlelartvdaaaq  
 ident  
 Sbjct vagePLPV--DSEKD-----ifdYIQWK----- 318  
 DSSP ee1LLLL--LLHHH----hhhHLLL-----

DSSP hhhhhhhhh1111  
 Query avqrfvaridratkr 292  
 ident  
 Sbjct -----yrepkdrse 327  
 DSSP -----111hh111

No 55: Query=mol1A Sbjct=5db6A Z-score=7.2





```

ident          | |
Sbjct knedklnhhqriglkyfgdfEKRIPREEMLQMQDIVLnEVKKvdSEYIATVCGSFRRGA- 179
DSSP  11hhh11hhhhhhhh11hhhhHLEEEHHHHHHHHHHHHHHHHHH1LLEEEELHHHHLLL-

DSSP  h1111111LLEEEEL-----1LHHHHHHHHHHHHhh1111eeEEELLEEL111
Query  rgipdsrTSKDFATVAR-----rDIELIHEQLADAGetgwegftAIFTAPEEJaap 119
ident          | |
Sbjct -----eSSGDMVLLThpsftsespkLLHQVVEQLQKVH-----FITDTLSKG--- 222
DSSP  -----1EELLEEEEEE111111111hHHHHHHHHHHHLL-----LEEEEEEEL---

DSSP  111LLEEEEEEEL--LEEEEEEEL-LLLL1111eeee1hhh11111lee
Query  gxpVKPRRFTAKLSYR--GRAFATVPIEVSSV-EAGNadqfdtlttsdalglvgvpaavav 176
ident          | |
Sbjct ---ETKFMGVCQLPSKndEKEYPHRRIDIRLIpKDQY----- 256
DSSP  ---LLEEEEEE111111111LLEEEEEEEL1HHHH-----

DSSP  ee11HHHHhhhhhhhh1111111111111111hhhhHHHHHH-----
Query  pcxtiPWQIaqlhavtavleepkandrahdLvDLQLE----- 215
ident          | |
Sbjct ----yCGVL-----yftgSDIFNKmrahalekgftineytirpl 292
DSSP  ----hHHHH-----hhh1LHHHHhhhhhhhh1lee1111lee1

DSSP  hh11hhhhhhHHHHHHhhhh1111LLELL111111hhhhhhhh1111111111hhhh
Query  gllldadlxptRSACIaifearaqhpWPPRVat1phwpliYagalegldhlelartvdaa 275
ident          | |
Sbjct gvtgvageplpVDSEK-----difDYIQW----- 316
DSSP  111111111111LHLLH-----hhHHL-----

DSSP  hhhhhhhhhhh1111
Query  aqavqrvaridratkr 292
ident          | |
Sbjct -----kyrepkdrse 326
DSSP  -----1111hhh111

```

No 57: Query=mol1A Sbjct=4o9mA Z-score=7.2

[back to top](#)

```

DSSP  -----
Query  ----- 0
ident          | |
Sbjct pqetlnggitdmltelanfeknvsqaihkyayrkaasviakypkiksgaeakklpgvg 60
DSSP  11hhhhhhhhhhhhhhhhhh1111hhhhhhhhhhhhhhhh111111hhhh111111

DSSP  -----11111111
Query  -----aapysppt 9
ident          | |
Sbjct tkiaekideflatgklrklekirqddtssinfltrvsgigpsaarkfvdegiktledlr 120
DSSP  hhhhhhhhhhh1111hhhhhhhh1hhhhhhhh111111hhhhhhhh1111hhhh

DSSP  1hhhhhhhhhh1111hHHHHHHHHHHHHHHHL-LLLL1LLEEEHHHHHHHH
Query  nlrslrdrltqaerqgvfGRLQRHVAXIVVAQFAAT-LTDDtGAPLLLVKGGSSLELr 68
ident          | |
Sbjct knedklnhhqriglkyfgdfEKRIPREEMLQMQDIVLnEVKKvdSEYIATVCGSFRRGA- 179
DSSP  11hhh11hhhhhhhh11hhhhHLEEEHHHHHHHHHHHHHHHH1LLEEEELHHHHLLL-

DSSP  h111111LLEEEEL-----1LHHHHHHHHHHHHhh1111eeEEELLEEL111
Query  rgipdsrTSKDFATVAR-----rDIELIHEQLADAGetgwegftAIFTAPEEJaap 119
ident          | |
Sbjct -----eSSGDMVLLThpsftsespkLLHQVVEQLQKVH-----FITDTLSKG--- 222
DSSP  -----1EELLEEEEEE111111111HHHHHHHHHHLL-----LEEEEEEEL---

DSSP  111LLEEEEEEEL--LEEEEEEEL-LLLL1111eeee1hhh11111lee
Query  gxpVKPRRFTAKLSYR--GRAFATVPIEVSSV-EAGNadqfdtlttsdalglvgvpaavav 176
ident          | |
Sbjct ---ETKFMGVCQLPSKndEKEYPHRRIDIRLIpKDQY----- 256
DSSP  ---LLEEEEEE111111111LLEEEEEEEL1HHHH-----

```

DSSP eellhHHHHhhhhhhhh111111111111hhhhHHHHHH-----  
Query pcxtiPWQIaqlhavlavleekandrahdLvDLQLE----- 215  
ident  
Sbjct ---yCGVL-----yftgSDIFNKNmrahalekgftineytirpl 292  
DSSP ---hHHHH-----hhlLHHHHhhhhhhhh11eeel111eeel

DSSP -hll1hhhhhhhhHHHHhhhhhh111LLLLL11111hhhhhhhh1111111111hh  
Query -gl1ldadlxptrSACIaifearaqhPWPPRVat1phwpliyagalegldhlelartvda 274  
ident  
Sbjct gvtgvageplpvdSEKD-----ifDYIQWK----- 317  
DSSP 111111111111LHHH-----hhLLLLL-----

DSSP hhhhhhhhhhhhh1111  
Query aaqavqrfvaridratkr 292  
ident  
Sbjct -----yrepkdrse 326  
DSSP -----111hhhh111

No 58: Query=mol1A Sbjct=4m91A Z-score=7.2

[back to top](#)

DSSP -----  
Query ----- 0  
ident  
Sbjct tlnggitdmltelanfekvnvsqaihkynayrkaasviakyphkiksgaeakklpgvgtki 60  
DSSP 111hhhhhhhhhhhhhh1111hhhhhhhhhhhhhh111111hhhh11111hh

DSSP -----111111111hh  
Query -----aapyspntlr 12  
ident  
Sbjct aekideflatgklrklekirqdtssinfltrvsgigpsaarkfvdegiktledlrkne 120  
DSSP hhhhhhhhh111hhhhhh11hhhhhhhh111111hhhhhhhh1111hhhh11h

DSSP hhhhhhhhhhh1111hHHHHHHHHHHHHHHHHL-LLLLLLLEEEHHHHHHhh11  
Query slrdrltqvaerqgvfGRLQRHVAXIVVAQFAAT-LTDDTGAPLLLKVGSSLELrgi 71  
ident  
Sbjct dklnhhqriglkyfgdfEKRIPREEMLMQDIVLNeVKKVDSEYIATVCGSFRRGA---- 176  
DSSP hhl1hhhhhhhh1hhhhLLEEHHHHHHHHHHHHHHHHLLLEEEELHHHHLLL----

DSSP 1111LLEEEEL-----1LHHHHHHHHHHHHhh1111eEEELLEEL11111L  
Query pdsrTSKDFATVAR-----rDIELIHEQLADAGetwegftAIFTAPEElaapxpV 123  
ident  
Sbjct ---eSSGDMDVLLThpsftseskLLHQVVEQLQKVH-----FITDTLSKG-----E 219  
DSSP ---1EELLEEEEL11111111HHHHHHHHHHLL-----LEEEEL-----L

DSSP LEEEEEEEEELLEEEEEEEEEEL-LLLL1111eeeeelhhhh11111eeeeelhh  
Query KPRRFTAKLSYrGRAFATVPIEVSSV-EAGNadqfdt1tsdalglvgvpaavavpctiP 182  
ident  
Sbjct TKFMGVCQLPS-EKEYPHRRIDIRLIpKDQY-----yC 251  
DSSP LEEEEELLLL-LLLLLLEEEEL1HHHH-----hh

DSSP HHHhhhhhhhh1111111111HHHHHHH-----hhhh11hHHHHhhH  
Query WQIaqlhavlavleekandrahdLVDLQ-----1leg111dADLXptrS 228  
ident  
Sbjct GVL-----yftgSDIFNKNmrahalekgftinkytirpvagEPLP---V 292  
DSSP HHH-----hhlLHHHHhhhhhhhh11ee1111ee1111LLL---L

DSSP HHHhhhhhh1111LLLL1111hhhhhhhh1111111111hhhhhhhhhhhhhh  
Query ACIaifearaqhWPPRVat1phwpliyagalegldhlelartvdaaaqavqrfvaridr 288  
ident  
Sbjct SEK-----difDYIQW-----kyrepk 309  
DSSP LHH-----hhHLLL-----1111hh

DSSP 1111  
Query atkr 292  
ident

Sbjct drse 313  
DSSP h111

No 59: Query=mol1A Sbjct=5j0rA Z-score=7.2

[back to top](#)

```
DSSP -----
Query ----- 0
ident
Sbjct apqetlnggitdmltelanfeknvsqaihkynayrkaasviakypkiksgaeakklpgv 60
DSSP 1111111hhhhhhhhhhhhhhhh1111hhhhhhhhhhhhhh1111111hhhh11111
```

```
DSSP -----1111111
Query -----aapyspp 8
ident
Sbjct gtkiaekideflatgklrklekirqddtssinfltrvsgigpsaarkfvdegiktledl 120
DSSP 1hhhhhhhhhhhh111hhhhhhhh1hhhhhhhh1111111hhhhhhhh1111hhhh
```

```
DSSP 11hhhhhhhhhhhh1111hhhhHHHHHHHHHHHHHHH-LLLL1111LLEEEHHHHHHH
Query tnlrsldrldtqvaerqgvfgrlqRHVAXIVVAQFAA-TLTDdtGAPLLLVKGGSSLEL 67
ident
Sbjct rknedklnhhqriglkyfgdfekriPREEMLQMQDIVLnEVKKvdSEYIATVCGSFRRGA 180
DSSP hhlhhhl1hhhhhhhh1hhhh11eHHHHHHHHHHHHHHHHHH1LLEEEELHHHHLLL
```

```
DSSP hh11111LLEEEEL-----1LHHHHHHHHHHhh1111eeEEELLLEE111
Query rrgipdsrTSKDFATVAR-----rDIELIHEQLADAGetgwegftAIFTAPEEiaa 118
ident
Sbjct -----eSSGDMVLLThpsftsespkLLHQVVEQLQKVH-----FITDTLSK--- 222
DSSP -----1EELLEEEEEE111111111HHHHHHHHHHHLL-----LEEEEEE---
```

```
DSSP 1111LLEEEEEEEL--LEEEEEEEL-LLLL1111eeee1hhhh1111lee
Query pgxpVKPRRTAKLSYR--GRAFATVPIEVSSV-EAGNadqfdtlttsdalglvgvpaava 175
ident
Sbjct ---gETKFMGVCQLPSKndEKEYPHRRIDIRLIpKDQY----- 257
DSSP ---1LLEEEEEE111111111LLEEEEEE1HHHH-----
```

```
DSSP eeellHHHHhhhhhh1111111111HHHH-----hhhhhh
Query vpcxtiPWQIaqk1havtavlepkandraHDLV-----dlqlleg 216
ident
Sbjct ----yCGVL-----yftgSDIFnknmrahalekgftineytirplgvt 296
DSSP ----hHHHH-----hh1LHHHHhhhhhhhh1lee111lee1111
```

```
DSSP h1hhHHHHhhHHHHhhhh1111LLL11111hhhhhhhh1111111111hhhh
Query 111daDXPTrSACIAifearaqhPWPPRvatlphwpliyagalegldhlelartvdaaa 276
ident
Sbjct gvagePLPV--DSEKD----ifdYIQWK----- 318
DSSP 1111LLL--LHHH----hhhLLL-----
```

```
DSSP hhhhhhhhhhh1111
Query qavqrfvaridratkr 292
ident
Sbjct -----yrepkdrse 327
DSSP -----11hhhh111
```

No 60: Query=mol1A Sbjct=4r63A Z-score=7.2

[back to top](#)

```
DSSP -----
Query ----- 0
ident
Sbjct pqetlnggitdmltelanfeknvsqaihkynayrkaasviakypkiksgaeakklpgvg 60
DSSP 11hhhhhhhhhhhhhhhhhh1111hhhhhhhhhhhhhh1111111hhhh1111111
```

```
DSSP -----111111111
```

```

Query -----aapysppt          9
ident
Sbjct tkiaekideflatgklrklekirqddtsssinfltrvsgigpsaarkfvdegiktledlr 120
DSSP  hhhhhhhhhhhhhhh111hhhhhhhhhhhhhhhhhhhhhh111111hhhhhhhhhh1111hhhhhh

DSSP  lhhhhhhhhhhhhhh111hhhhhhHHHHHHHHHHHHHHH-LLLL11LLLEEEHHHHHHHHH
Query nlrslrdrltqvaerqgvfgrlqRHVAXIVVAQFAA-TLTDdtGAPLLLKGGSSLELr 68
ident          | |
Sbjct knedklnhhqriglkyfgdfekriPREEMLQMQDIVLnEVKKvdSEYIATVCGSFRRGA- 179
DSSP  hlhhh11hhhhhhhhhh1hhhhhh1leEHHHHHHHHHHHHHHHHHHh1LLEEEELHHHLLL-

DSSP  h111111LLLEEEEL-----1LHHHHHHHHHHHHhh1111eeEEELLLEE111
Query rgipdsrTSKDFATVAR-----rDIELIHEQLADAGetgwegftAIFTAPEEiaa 118
ident          | |          | |
Sbjct -----eSSGDMVLLThpsftsesqpkLLHQVVEQLQKVH-----FITDTLSK--- 222
DSSP  -----1EELLEEEEEE1111111111HHHHHHHHHHHLL-----LEEEEEE---

DSSP  1111LLLEEEEEEELL--EEEEEEEEEEEL-LLLL1111eeeeelhhhh1111lee
Query pgxpVKPRRFTAKLSYRG--RAFATVPIEVSSV-EAGNadqfdtlttsdalglvgpaava 175
ident          |          |
Sbjct ---gETKFMGVCQLPSKNdeKEYPHRRIDIALIpKDQY----- 257
DSSP  ---1LLEEEEEE1111111111LLLEEEEEEEL1HHHH-----

DSSP  eeellHHHHhhhhhhhh11111111111HHHH-----hhhhhhhh1
Query vpcxtiPWQIaqlhavlavlepkandraHDLV-----dlqllegll 218
ident          |
Sbjct -----yCGVL-----yftgSDIFnknmrahalekgftineytirplgvt 296
DSSP  -----hHHHH-----hhh1LHHHHhhhhhhhhhh1leeell11lee1111

DSSP  lhhhhhhhhHHHHhhhhhh11111111111hhhhhhhh1111111111hhhhhhhh
Query ldadlxptrSACIAifearaqhPWPPRvatlphwplyagaleglhdhlelartvdaaaqa 278
ident
Sbjct gvageplpvDSEKD----ifdYIQWK----- 318
DSSP  1111111111LHHH-----hhHLLL-----

DSSP  hhhhhhhhh1111
Query vqrfvaridratkr 292
ident
Sbjct -----yrepkdrse 327
DSSP  -----11hhhh111

```

No 61: Query=mol1A Sbjct=5dbcA Z-score=7.2

[back to top](#)

```

DSSP -----
Query ----- 0
ident
Sbjct pqetlngitdmltelanfeknvsqaihknayrkaasviakypkiksgaeakklpgvg 60
DSSP  111111hhhhhhhhhhhhhhhhhhhh1111hhhhhhhhhhhhhhhh111111hhhhhh111111

DSSP -----111111111
Query -----aapysppt          9
ident
Sbjct tkiaekideflatgklrklekirqddtsssinfltrvsgigpsaarkfvdegiktledlr 120
DSSP  hhhhhhhhhhhhhhh111hhhhhhhhhhhhhhhhhhhhhh111111hhhhhhhhhh1111hhhhhh

DSSP  lhhhhhhhhhhhhhh111hhhhhhHHHHHHHHHHHHHHH-LLLL11LLLEEEHHHHHHHHH
Query nlrslrdrltqvaerqgvfgrlqRHVAXIVVAQFAA-TLTDdtGAPLLLKGGSSLELr 68
ident          | |
Sbjct knedklnhhqriglkyfgdfekriPREEMLQMQDIVLnEVKKvdSEYIATVCGSFRRGA- 179
DSSP  l1hhh11hhhhhhhhhh1hhhhhh1leEHHHHHHHHHHHHHHHHHHh1LLEEEELHHHLLL-

DSSP  h111111LLLEEEEL-----1LHHHHHHHHHHHHhh1111eeEEELLLEE111
Query rgipdsrTSKDFATVAR-----rDIELIHEQLADAGetgwegftAIFTAPEEiaa 118
ident          | |          | |
Sbjct -----eSSGDMVLLThpsftsesqpkLLHQVVEQLQKVH-----FITDTLSK--- 222
DSSP  -----1EELLEEEEEE1111111111LHHHHHHHHHHLL-----LEEEEEE---

```









```

DSSP  -----1LLEEEEEELLLLLL1LLLLLEEEEEELLLLLH-----
Query  eeee1hHHHHhhhhhhhh1111111111HHHH-----hhhhhhh
ident  avpcxtiPWQIaqlhavlavleepkandraHDLV-----dlqllegl 217
Sbjct  -----yCGVL-----yftgSDIFnknmrahalekgftineytirplgv 297
DSSP  -----hHHHH-----hhhLHHHHhhhhhhhhhhleeel1leeel1

DSSP  11hhhhhhhhHHHHhhhhhh111LLLLL11111hhhhhhhhhh1111111111hhhhhh
Query  1ldadlxptrSACIAifearaqhPWPPRvatlphwpliyagalegldhlelartvdaaaq 277
ident  tgavageplpvDSEKD-----ifdYIQWK----- 320
Sbjct  1111111111LHHH-----hhhLHLL-----
DSSP  1111111111LHHH-----hhhLHLL-----

DSSP  hhhhhhhhhhh1111
Query  avqrfvaridratkr 292
ident  -----yrepkdrse 329
Sbjct  -----111hhh111
DSSP  -----111hhh111

```

No 66: Query=mol1A Sbjct=5j0pA Z-score=7.1

[back to top](#)

```

DSSP  -----
Query  ----- 0
ident  -----
Sbjct  apqetlnggitdmltelanfeknvsqaihknayrkaasviakyphkiksgaeakklpgv 60
DSSP  111hhhhhhhhhhhhhhhhhhhh1111hhhhhhhhhhhhhh11111111hhhhhh11111

DSSP  -----11111111
Query  -----aapysspp 8
ident  -----
Sbjct  gtkiaekideflatgklrklekirqddtssinfltrvsgigpsaarkfvdegiktledl 120
DSSP  1hhhhhhhhhhhhhh11hhhhhhhhhhhhhhhhhh1111111hhhhhhhhhh11111hhhh

DSSP  11hhhhhhhhhhhhhh111hhhhhhHHHHHHHHHHHHH-LLLL111LLEEEHHHHHHH
Query  tnrlsrldrltqvaerqgvfgrlqRHVAXIVVAQFAA-TLTDdtGAPLLLVKGGSSLEL 67
ident  -----
Sbjct  rknedklnhhqriglkygdfekriPREEMLQMQDIVLnEVKKvdSEYIATVCGSFRRGA 180
DSSP  hhlhhh11hhhhhhhh1hhhh111eEHHHHHHHHHHHHHHHHHH1LLEEEELHHHHLLL

DSSP  hh111111LLEEEEEEEL-----1LHHHHHHHHHHHHhh1111eeEEELLLEE
Query  rrgipdsrTSKDFATVAR-----rDIELIHEQLADAGetgwegftAIFTAPEE 115
ident  -----
Sbjct  -----eSSGDMVLLThpsftsestqkqkLLHQVVEQLQKVH-----FITDTLSK 225
DSSP  -----1EELLEEEEEE1111111111111111HHHHHHHHHHHLL-----LEEEEEE

DSSP  1111111LLEEEEEEEL--1EEEEEEEEELLLLLL111eeee1hhhh111111
Query  iaapgxpVKPRRFTAKLSYR--gRAFATVPIEVSSVEAGNAdqfdt1tsdalglvgvpaa 173
ident  -----
Sbjct  -----gETKFMGVCQLPSKndeKEYPHRRIDIRLIPKDQY----- 260
DSSP  -----1LLEEEEEEELLLLL111LLLLLEEEEEELLLLLH-----

DSSP  eeee1hHHHHhhhhhhhh1111111111HHHH-----hhhhhhh
Query  vavpcxtiPWQIaqlhavlavleepkandraHDLV-----dlqlleg 216
ident  -----
Sbjct  -----yCGVL-----yftgSDIFnknmrahalekgftineytirplg 297
DSSP  -----hHHHH-----h111LHHHHhhhhhhhhhhleeel1leeel1

DSSP  h11hhhhhhhhHHHHhhhhhh111LLLLL11111hhhhhhhhhh1111111111hhhhhh
Query  11ldadlxptrSACIAifearaqhPWPPRvatlphwpliyagalegldhlelartvdaaa 276
ident  vtgavageplpvDSEKD-----ifdYIQWK----- 321
Sbjct  1111111111LHHH-----hhhLHLL-----
DSSP  1111111111LHHH-----hhhLHLL-----

DSSP  hhhhhhhhhhh1111

```

Query qavqrfivaridratkr 292  
ident  
Sbjct -----yrepkdrse 330  
DSSP -----llhhhhll

No 67: Query=mol1A Sbjct=4ub2A Z-score=7.1

[back to top](#)

DSSP -----  
Query ----- 0  
ident  
Sbjct lnggitdmltelanfekonvsqaihkynayrkaasviakyphkiksgaeakklpgvgtkia 60  
DSSP llhhhhhhhhhhhhhhhhhhllllhhhhhhhhhhhhhhhhllllllllllhhhhhhllllllhhhh

DSSP -----llllllllllllhhhh  
Query -----aapyspsptnlrs 13  
ident  
Sbjct ekideflatgklrklekirkddtssinflttrvsgigpsaarkfvddegiktledlrkned 120  
DSSP hhhhhhhhhllllhhhhhhhhllhhhhhhhhhhllllllllllhhhhhhhhhhllllllhhhhhhllhh

DSSP hhhhhhhhhhhllllhhhhhhHHHHHHHHHHHHHHHHH-LLLLlllllllEEEEHHHHHHHHhhllll  
Query lrdrltqvaerqgvfgrlqrHVAVXIVVAQFAA-TLTDdtGAPLLLVKGGSSLELrrgip 72  
ident  
Sbjct klnhhqriglkyfgdfekriPREEMLMQMDIVLnEVKKvdSEYIATVCGSFRRGA----- 175  
DSSP hllhhhhhhhhhhhhhhllleEHHHHHHHHHHHHHHHLLlllllllEEEEELHHHHHLL-----

DSSP lllllllEEEEEL-----lHHHHHHHHHHHHhhllllleeEEEEELLEEllllllll  
Query dsrTSKDFATVAR-----rDIELIHEQLADAGetgwegftAIFTAPEEiaapgxp 122  
ident  
Sbjct --eSSGDMVLLThpsftsseqpkLLHQVVEQLQKVH-----FITDLSK-----g 219  
DSSP --lEEEEEEEEllllllllllllHHHHHHHHHHHLL-----LEEEEEEE-----l

DSSP LLEEEEEEEEEELLEEEL-----LLLllllleeeelhhhhllllllleeeelhh  
Query VKPRRFTAKLSYRGRAFATVPIEVSSV-EAGNadqfdtlttdalglvgvpaavavpcxti 181  
ident  
Sbjct ETKFMGVCQLPSKNKEYPHRRIRLIPKQDY-----y 252  
DSSP LLEEEEEELLLLLLLLLLEEEEEELlHHHH-----h

DSSP HHHHHhhhhhhhhllllllllllllHHHH-----hhhhhhhhllhhHHH  
Query PWQIaqlhavtavleekandraHDLV-----dlqllegllldADX 224  
ident  
Sbjct CGVL-----yftgSDIFnknmrahalekgftineytirplggvagePLP 296  
DSSP HHHH-----hllllHHHHhhhhllhhhhleee1llllee1llllllll

DSSP HhhHHHHhhhhhhllllllllllllllllllllhhhhhhhhhhllllllllllllhhhhhhhhhhhh  
Query PtrSACIAifearaqhPWPPRvatlphwpliyagalegldhlelartvdaaaqavqrfva 284  
ident  
Sbjct V--DSEKD-----ifdYIQWK-----y 311  
DSSP L--LLHHH-----hhHLLLL-----l

DSSP hhhhllll  
Query ridratkr 292  
ident  
Sbjct repkdrse 319  
DSSP llhhhhll

No 68: Query=mol1A Sbjct=5db8A Z-score=7.1

[back to top](#)

DSSP -----  
Query ----- 0  
ident  
Sbjct ppetlnggitdmltelanfekonvsqaihkynayrkaasviakyphkiksgaeakklpgvg 60  
DSSP llhhhhhhhhhhhhhhhhhhhhllllhhhhhhhhhhhhhhhhllllllllllhhhhhhllllll

DSSP -----11111111  
Query -----aapysspt 9  
ident  
Sbjct tkiaekideflatgklrklekirqddtssinfltrvsgigsaarkfvdegiktledlr 120  
DSSP hhhhhhhhhhhhh111hhhhhhhh111hhhhhhhh111111hhhhhhhh11111hhhhhh

DSSP lhhhhhhhhhhhh1111hhhhhhHHHHHHHHHHHHH-LLLL11LLLEEEHHHHHHHH  
Query nlrslrdrltqvaerqgvfgrlqRHVAXIVVAQFAA-TLTDdtGAPLLLVKGGSSLELr 68  
ident | |  
Sbjct knedklnhhqrigrklyfgdfekriPREEMLQMQDIVLnEVKKvdSEYIATVCGSFRRGA- 179  
DSSP l1hhh11hhhhhhhh11hhhh111eEHHHHHHHHHHHHHHHHHH1LLEEEELHHHHLLL-

DSSP h111111LLLEEEEL-----1LHHHHHHHHHHHHhh1111eeEELLEEE111  
Query rgipdsrTSKDFATVAR-----rDIELIHEQLADAGetgewgftAIFTAPEEiaa 118  
ident | | | | |  
Sbjct -----eSSGDMVLLThpsftsesqpkLLHQVVEQLQKVH-----FITDTLSK---- 222  
DSSP -----1EELLEEEEEE11111111111HHHHHHHHHHLL-----LEEEEEE---

DSSP 1111LLLEEEEEEEL--LEEEEEEEL-LLLL1111eeee1hhhh1111lee  
Query pgxpVKPRRFATAKLSYR--GRAFATVPIEVSSV-EAGNadqfdt1tsdalglvpaava 175  
ident | |  
Sbjct ---gETKFMGVCQLPSKndEKEYPHRRIDIRLIpKDQY----- 257  
DSSP ---1LLEEEEEE11111111111LLLEEEEEEEL1HHHH-----

DSSP eeellHHHHhhhhhh11111111111HHHH-----hhhhhhh1  
Query vpcxtiPWQIaqlhavtavleekandraHDLV-----dlqllegll 218  
ident |  
Sbjct ----yCGVL-----yftgSDIFnknmrahalekgftineytirplgvt 296  
DSSP ----hHHHH-----h111LHHHHhhhhhhhh111lee111lee1111

DSSP lhhhhhhhhHHHHhhhhhh11111111111HHHHhhhh1111111111hhhhhhh  
Query ldadlxptrSACIAifearaqHPWPPRvatlphwpliayagalegldhlelartvdaaaqa 278  
ident  
Sbjct gvageplpvDSEKD----ifdYIQWK----- 318  
DSSP 1111111111LHHH----hhhHLLL-----

DSSP hhhhhhhhh1111  
Query vqrfvaridratkr 292  
ident  
Sbjct ----yrepkdrse 327  
DSSP ----111hhhh111

No 69: Query=mol1A Sbjct=5db9A Z-score=7.1

[back to top](#)

DSSP -----  
Query ----- 0  
ident  
Sbjct ppetlnggitdmltelanfeknvsqaihknayrkaasviakypkiksgaeakklpgvg 60  
DSSP 1111111111111111111111111111111111111111111111111111111

DSSP -----11111111  
Query -----aapysspt 9  
ident  
Sbjct tkiaekideflatgklrklekirqddtssinfltrvsgigsaarkfvdegiktledlr 120  
DSSP hhhhhhhhhhhhh111hhhhhhhh111hhhhhhhh111111hhhhhhhh11111hhhhhh

DSSP lhhhhhhhhhhhh1111hhhhhhHHHHHHHHHHHHH-LLLL11LLLEEEHHHHHHHH  
Query nlrslrdrltqvaerqgvfgrlqRHVAXIVVAQFAA-TLTDdtGAPLLLVKGGSSLELr 68  
ident | |  
Sbjct knedklnhhqrigrklyfgdfekriPREEMLQMQDIVLnEVKKvdSEYIATVCGSFRRGA- 179  
DSSP l1hhh11hhhhhhhh11hhhh111eEHHHHHHHHHHHHHHHHHH1LLEEEELHHHHLLL-

DSSP h111111LLLEEEEL-----1LHHHHHHHHHHHHhh1111eeEELLEEE111  
Query rgipdsrTSKDFATVAR-----rDIELIHEQLADAGetgewgftAIFTAPEEiaa 118  
ident | | | | |

Sbjct -----eSSGDMVLLThpsftsesqpkLLHQVVEQLQKVH-----FIDTLISK--- 222  
DSSP -----1EELLEEEEE1111111111HHHHHHHHHHLL-----LEEEEEEE---

DSSP 1111LLEEEEEEEELL--EEEEEEEEEEELLLLL1111eeeee1hhh1111lee  
Query pgxpVKPRRFTAKLSYRG--RAFATVPIEVSSVEAGNAdqfdtlttsdalglvgvpaavav 176  
ident | |  
Sbjct ---gETKFMGVCQLPSKNdeKEYPHRRIDIRLIPKDQY----- 257  
DSSP ---1LLEEEEEELLLLL1111LLEEEEEELHHHH-----

DSSP ee11HHHHhhhhhh1111111111HHHH-----hhhhhhhh11  
Query pcxtiPWQIaqlhavtavleepkandraHDLV-----dlqllegl11 219  
ident |  
Sbjct ----yCGVL-----yftgSDIFnknmrahalekgftineytirplgvtg 297  
DSSP ----hHHHH-----hhh1LHHHHhhhhhhhh11lee1111ee1111

DSSP hhhhhhhHHHHhhhh1111LLELL111111hhhhhhhh11111111hhhhhhhh  
Query dadlxptrSACIAifearaqhPWPPRvatlphwpliyagaleglhdlelar tvdaaaqav 279  
ident  
Sbjct vageplpvDSEKD----ifdYIQWK----- 318  
DSSP 11111111LHLLL-----hhHLLL-----

DSSP hhhhhhh1111  
Query qrfvaridratkr 292  
ident  
Sbjct ----yrepkdrse 327  
DSSP ----111hh111

No 70: Query=mol1A Sbjct=4kliA Z-score=7.1

[back to top](#)

DSSP -----  
Query ----- 0  
ident  
Sbjct tlnggitdmltelanfeknvsqaihkynayrkaasviakyphkiksgaeakklpgvgtki 60  
DSSP 111hhhhhhhhhhhhhh1111hhhhhhhhhhhhhh111111hhhh11111hh

DSSP -----11111111hh  
Query -----aapyspptnlr 12  
ident  
Sbjct aekideflatgklrklekirqddtssinfltrvsgigpsaarkfvdegiktledlrkne 120  
DSSP hhhhhhhhh111hhhhhhhh1hhhhhhhh111111hhhhhhhh1111hhhhhh1h

DSSP hhhhhhhhhhh1111hhhhHHHHHHHHHHHH--LLLL11LLEEEHHHHHHhh11  
Query slrdrltqvaerqgvfgrlqRHVAXIVVAQFAA-TLTDdtGAPLLLVKGGSSLELrgi 71  
ident | |  
Sbjct dklnhhqriglkyfgdfekriPREEMLMQDIVLnEVKvdSEYIATVCGSFRRGA---- 176  
DSSP h11hhhhhhhh1hhhh111eEHHHHHHHHHHHHHHHH1LLEEEELHHHHLL-----

DSSP 1111LLEEEEEEL-----1LHHHHHHHHHHhh1111eeEEELLEEL111  
Query pdsrTSKDFATVAR-----rDIELIHEQLADAGetgwegftAIFTAPEElaap 119  
ident | | | |  
Sbjct ---eSSGDMVLLThpsftsestqpkLLHQVVEQLQKVH-----FITDTLSKG--- 222  
DSSP ---1EELLEEEEE1111111111HHHHHHHHHHLL-----LEEEEEEE---

DSSP 111LLEEEEEEEEL--LEEEEEEEEEEL--LLLL1111eeeee1hhh1111lee  
Query gxpVKPRRFTAKLSYRG--GRAFATVPIEVSSV-EAGNAdqfdtlttsdalglvgvpaavav 176  
ident | |  
Sbjct ---ETKFMGVCQLPSKNdeKEYPHRRIDIRLIPKDQY----- 256  
DSSP ---LLEEEEEELLLLL11LLEEEEEELHHHH-----

DSSP ee11HHHHhhhhhh1111111111HHHHHH-----hhhh  
Query pcxtiPWQIaqlhavtavleepkandraHDLVDLQ-----llegl 217  
ident |  
Sbjct ----yCGVL-----yftgSDIFNKNmrahalekgftineytirplgvtg 296  
DSSP ----hHHHH-----hhh1LHHHHhhhhhhhh11lee1111ee1111

DSSP 11hHHHHHHHHHHHHHHHH1111LLLLL11111hhhhhhhh111111111hhhhhh  
 Query 1ldADLXptRSACIaifearaqhpWPPRVatlphwplyagalegldhlelartvdaaaq 277  
 ident |  
 Sbjct vagEPLP--VDSEK-----difDYIQW----- 316  
 DSSP 1111LLL--LLLHH-----hhhHLLL-----

DSSP hhhhhhhhh1111  
 Query avqrfvaridratkr 292  
 ident  
 Sbjct ----kyrepkdrse 326  
 DSSP ----1111hh111

No 71: Query=mol1A Sbjct=4kloA Z-score=7.1

[back to top](#)

DSSP -----  
 Query ----- 0  
 ident  
 Sbjct tlnggitdmltelanfeknvsqaihkynayrkaasviakypkiksgaeakklpgvgtki 60  
 DSSP 111hhhhhhhhhhhhhh111hhhhhhhhhhhhhh11111hhhh11111hh

DSSP -----111111111hh  
 Query -----aapyspntlr 12  
 ident  
 Sbjct aekideflatgklrklekirqddtssinfltrvsgigpsaarkfvdegiktledlrkne 120  
 DSSP hhhhhhhhh111hhhhhhhh1hhhhhhhh111111hhhhhhhh1111hhhhhhhh

DSSP hhhhhhhhh1111hhhhHHHHHHHHHHHHH-LLLL11LLLLEEEHHHHHHhh11  
 Query slrdrltqvaerqgvfgrlqRHVAXIVVAQFAA-TLTDdtGAPLLLKGGSSLELrgi 71  
 ident | |  
 Sbjct dklnhhqrigrlykfygdfekriPREEMLMQMDIVLnEVKKvdSEYIATVCGSFRRGA---- 176  
 DSSP hh11hhhhhhhh1hhhh111eHHHHHHHHHHHHHHHHHH11LLEEEELHHHLLL----

DSSP 1111LLLLEEEEL-----1LHHHHHHHHHHHHhh1111eeEELLEEL111  
 Query pdsrTSKDFATVAR-----rDIELIHEQLADAGetgwegftAIFTAPEElaap 119  
 ident | | | | |  
 Sbjct ---eSSGDMVDLLThpsftsetkqpkLLHQVVEQLQKVH-----FITDTLSKG--- 222  
 DSSP ---1EELLEEEEEE11111111111HHHHHHHHHHLL-----LEEEEEEEL---

DSSP 1111LLLLEEEEEEEL--LEEEEEEEL-LLLL1111eeehhhh1111lee  
 Query gxpVKPRRFTAKLSYR--GRAFATVPIEVSSV-EAGNadqfdtltaldglvgvpaavav 176  
 ident | | | | |  
 Sbjct ---ETKFMGVCQLPSKndEKEYPHRRIDIRLlpKDQY----- 256  
 DSSP ---LEEEEEEELLLL11111111111HHHHHHHHHHLL-----

DSSP eel1hHHHHHHHHHH1111111111HHHHHHH-----hhhhh  
 Query pcxtiPWQIaqlhavtavleepkandraHDLVDLQ-----llegl 217  
 ident |  
 Sbjct ---yCGVL-----yftgSDIFNKNmrahalekgftineytirplgvtg 296  
 DSSP ---hhhhh-----hh1LHHHHHHHHHHhh11lee111lee1111

DSSP 11hHHHHhhHHHHHHHHHH1111LLLLL11111hhhhhhhh111111111hhhhhh  
 Query 1ldADLXptRSACIaifearaqhpWPPRVatlphwplyagalegldhlelartvdaaaq 277  
 ident |  
 Sbjct vagEPLP--VDSEK-----difDYIQW----- 316  
 DSSP 1111LLL--LLLHH-----hhhHLLL-----

DSSP hhhhhhhhh1111  
 Query avqrfvaridratkr 292  
 ident  
 Sbjct ----kyrepkdrse 326  
 DSSP ----1111hh111

No 72: Query=mol1A Sbjct=4klfA Z-score=7.1

[back to top](#)

```
DSSP ----- 0
Query -----
ident -----
Sbjct tlnggitdmltelanfeknvsqaihkynayrkaasviakyphkiksgaeakklpgvgtki 60
DSSP 111hhhhhhhhhhhhhhhhhh111hhhhhhhhhhhhhhhh111111hhhhhh11111hhh
```

```
DSSP -----11111111hh
Query -----aapysspntlr 12
ident -----
Sbjct aekideflatgklrklekirqddtssinflttrvsgigpsaarkfvdegiktledlrkne 120
DSSP hhhhhhhhh111hhhhhhhhhhhhhhhh111111hhhhhhhh1111hhhhhhhh
```

```
DSSP hhhhhhhhhhh111hhhhHHHHHHHHHHHH-LLLL11LLLEEEHHHHHHhh11
Query slrdrltqvaerqgvfgrlqRHVAXIVVAQFAA-TLTDdtGAPLLLVKGGSSLELrrgi 71
ident | |
Sbjct dklnhhqrigrlyfgdfekriPREEMLMQDIVLnEVKkvdSEYIATVCGSFRRGA---- 176
DSSP hhl1hhhhhhhh1hhhhhh1leHHHHHHHHHHHHHHHHHH11LLLEEEELHHHLLL----
```

```
DSSP 1111LLLEEEEEEEL-----1LHHHHHHHHHHHHhh111leeEEELLEEL111
Query pdsrTSKDFATVAR-----rDIELIHEQLADAGetgwegftAIFTAPEEIaap 119
ident | |
Sbjct ---eSSGMDVLLThpsftsestqpkLLHQVVEQLQKVH-----FITDTLSKG--- 222
DSSP ---LEELLEEEEEE1111111111HHHHHHHHHHLL-----LEEEEEEEL---
```

```
DSSP 1111LLLEEEEEEEL--LEEEEEEEL-LLLL1111eeee1hhhh1111lee
Query gxpVKPRRFTAKLSYR--GRAFATVPIEVSSV-EAGNadqfdtltsdalglvgaavav 176
ident | |
Sbjct ---ETKFMGVCQLPSKndEKEYPHRRIDIRLIpKDQY----- 256
DSSP ---LEEEEEEELLLL11LLLEEEEEEEL1HHHH-----
```

```
DSSP eel1hHHHHhhhhhhhh1111111111HHHHHHHH-----hhh
Query pcxtiPWQIaqk1havtavleepkandraHDLVDLQL-----legl 217
ident |
Sbjct ---yCGVL-----yftgSDIFNKMraha1ekgftineytirplgvgtg 296
DSSP ---hHHHH-----hh1LHHHHHHHHhhhhhhhhlee111lee111111
```

```
DSSP 11hHHHHhhHHHHhhhhhh1111LLL1111hhhhhhhh11111111hhhhhh
Query 11dADLXptRSACIaifearaqhpWPPRVatlphwpliyagalegldhlelartvdaaaq 277
ident |
Sbjct vagEPLP--VDSEK-----difDYIQW----- 316
DSSP 111LLL--LLLHH-----hhHHL
```

```
DSSP hhhhhhhhh1111
Query avqrfvaridrskr 292
ident -----
Sbjct -----kyrepkdrse 326
DSSP -----1111hh111
```

No 73: Query=mol1A Sbjct=4kljA Z-score=7.1

[back to top](#)

```
DSSP ----- 0
Query -----
ident -----
Sbjct tlnggitdmltelanfeknvsqaihkynayrkaasviakyphkiksgaeakklpgvgtki 60
DSSP 111hhhhhhhhhhhhhhhhhh111hhhhhhhhhhhhhhhh111111hhhhhh11111hhh
```

```
DSSP -----11111111hh
Query -----aapysspntlr 12
ident -----
Sbjct aekideflatgklrklekirqddtssinflttrvsgigpsaarkfvdegiktledlrkne 120
DSSP hhhhhhhhh111hhhhhhhhhhhhhhhh111111hhhhhhhh1111hhhhhhhh
```

```
DSSP hhhhhhhhhhh111hhhhHHHHHHHHHHHH-LLLL11LLLEEEHHHHHHhh11
Query slrdrltqvaerqgvfgrlqRHVAXIVVAQFAA-TLTDdtGAPLLLVKGGSSLELrrgi 71
```

```

ident
Sbjct dklnhhqr iglkyfgdfekriPREEMLQMQDIVLnEVKKvdSEYIATVCGSFRRGA---- 176
DSSP hhl1hhhhhhhh1hhhh111eEHHHHHHHHHHHHHHHHHH1LLEEEEEEHHHLLL----

DSSP 1111LLEEEEEEEL-----1LHHHHHHHHHHHHhh1111eeEEELLEEL111
Query pdsrTSKDFATVAR-----rDIELIHEQLADAGetgwegftAIFTAPEEaap 119
ident | | | | |
Sbjct ---eSSGDMVDLLThpsfts estkqpkLLHQVVEQLQKVH-----FITDTLSKG--- 222
DSSP ---1EELLEEEEEE111111111111HHHHHHHHHHLL-----LEEEEEEEL---

DSSP 111LLEEEEEEEL--LEEEEEEEL-LLLL1111eeeee1hhhh11111ee
Query gxpVKPRRFTAKLSYR--GRAFATVPIEVSSV-EAGNadqfdtlttsdalglvgvpaavav 176
ident | | |
Sbjct ---ETKFMGVCQLPSKndEKEYPHRRIDIRLlpKDQY----- 256
DSSP ---LLEEEEEEELLLL1LLEEEEEEEL1HHHH-----

DSSP ee11hhhhhhhhhhhh1111111111HHHHHHH-----hhhhh
Query pcxtiPWQIaqlhavtavlepkandraHDLVDLQ-----llegl 217
ident |
Sbjct ----yCGVL-----yftgSDIFNKNmrahalekgftineytirplgvgtg 296
DSSP ----hHHHH-----hhlLHHHHHHHHHHhh1lee1111ee1111

DSSP 11hHHHHhhHHHHhhhhhh1111LLELL1111hhhhhhhh11111111hhhhhh
Query 1ldADLXptRSACIaifearaqhpWPPRVatlphwpliyagalegl dhlelartvdaaaq 277
ident |
Sbjct vagEPLP--VDSEK-----difDYIQW----- 316
DSSP 111LLELL--LLHH-----hHHHLL-----

DSSP hhhhhhhhh1111
Query avqrfvaridratkr 292
ident
Sbjct ----kyrepkdrse 326
DSSP ----1111hh111

```

No 74: Query=mol1A Sbjct=4gxkA Z-score=7.1

[back to top](#)

```

DSSP -----
Query ----- 0
ident
Sbjct tlnggitdmltelanfeknvsqaihkynayrkaasviakyphkiksgaeakklpgvgtki 60
DSSP 111hhhhhhhhhhhhhh111hhhhhhhhhhhhhh1111111hhhh11111hhhh

DSSP -----11111111hh
Query -----aapyspntlr 12
ident
Sbjct aekideflatgklrklekirqddtssinfltrvsgigpsaarkfvdegiktledlrkne 120
DSSP hhhhhhhhh111hhhhhhhh1hhhhhhhh1111111hhhhhhhh1111hhhhhhhh

DSSP hhhhhhhhh111hhhhHHHHHHHHHHH-LLLL11LLEEEHHHHHHHHhh11
Query slrdrltqvaerqgvfgrlqRHVAXIVVAQFAA-TLTDdtGAPLLLVKGSSELELrgi 71
ident | |
Sbjct dklnhhqr iglkyfgdfekriPREEMLQMQDIVLnEVKKvdSEYIATVCGSFRRGA---- 176
DSSP hhl1hhhhhhhh1hhhh11eEHHHHHHHHHHHHHHHH1LLEEEEEEELLLL----

DSSP 1111LLEEEEEEEL-----1LHHHHHHHHHHHHhh1111eeEEELLEEL1111
Query pdsrTSKDFATVAR-----rDIELIHEQLADAGetgwegftAIFTAPEEaapgx 121
ident | | | | |
Sbjct ---eSSGDMVDLLThpsfts esqpkLLHQVVEQLQKVH-----FITDTLSKG----- 220
DSSP ---1EELLEEEEEE111111111111HHHHHHHHHHLL-----LEEEEEEEL-----

DSSP 1LLEEEEEEEL-LEEEEEEEL-LLLL1111eeeee1hhhh11111eeeee1
Query pVKPRRFTAKLSYR--GRAFATVPIEVSSV-EAGNadqfdtlttsdalglvgvpaavavpcx 179
ident | |
Sbjct -ETKFMGVCQLPSKdEKEYPHRRIDIRLlpKDQY----- 253
DSSP -LLEEEEEEELLLL1LLEEEEEEEL1HHHH-----

```



DSSP lhHHHHhhhhhhhh1111111111HHHHHHH-----hHHhh1lhHHHHhhH  
Query tiPWQIaqlhavlavleekandraHDLVLDLQ-----lleg11ldADLXptR 227  
ident | |  
Sbjct -yCGVL-----yftgSDIFNKNmkahalekgftineytirpGEPLP--V 294  
DSSP -hHHHH-----hhl1LHHHHHHhhhhhh1111ee1111ee11LLLL--L

DSSP HHHHHhhhhhh1111LLLLL1111hhhhhhhh1111111111hhhhhhhhhhhhhhhh  
Query SACIaifearaqhpWPPRVat1phwpliyagalegldhlelartvdaaaqavqrfvarid 287  
ident |  
Sbjct DSEK-----difDYIQW-----kyrep 311  
DSSP LLHH-----hHHHLLL-----1111h

DSSP h1111  
Query ratkr 292  
ident  
Sbjct kdrse 316  
DSSP hhh11

No 75: Query=mol1A Sbjct=4klmA Z-score=7.1

[back to top](#)

DSSP -----  
Query ----- 0  
ident  
Sbjct tlnggitdmltelanfekonvsqaihkynayrkaasviakyphkiksgaeakklpgvgtki 60  
DSSP 111hhhhhhhhhhhhhh1111hhhhhhhhhhhhhh111111hhhh111111hh

DSSP -----1111111111hh  
Query -----aapyspntlr 12  
ident  
Sbjct aekideflatgklrklekirqdtssinfltrvsgigpsaarkfvdegiktledlrkne 120  
DSSP hhhhhhhhh111hhhhhhhh1hhhhhhhh111111hhhhhhhh1111hhhhhh1h

DSSP hhhhhhhhhhh1111hhhhHHHHHHHHHHHHH-LLLL11LLLLEEEEHHHHHHhh11  
Query slrdrltqvaerqgvfgrlqRHVAXIVVAQFAA-TLTDdtGAPLLLKGGSSLELrrgi 71  
ident | |  
Sbjct dklnhhqriglkyfgdfekriPREEMLMQDIVLnEVKkvdSEYIATVCGSFRGA---- 176  
DSSP hhl1hhhhhhhh1hhhh111eEHHHHHHHHHHHHHHHHH1LLEEEEEHHHLLL----

DSSP 1111LLLLEEEEEL-----1LHHHHHHHHHHHHhh1111eeEELLEEL111  
Query pdsrTSKDFATVAR-----rDIELIHEQLADAGetgwegftAIFTAPEElaap 119  
ident | | | |  
Sbjct ---eSSGDMDVLLThpsftsestkpqkLLHQVVEQLQKVH-----FITDTLSKG--- 222  
DSSP ---1EELLEEEEE11111111111HHHHHHHHHHLL-----LEEEEEEL---

DSSP 1111LLLLEEEEEEEL--LEEEEEEEEEEL-LLLL1111eeeee1hhhh111111eee  
Query gxpVKKRRFTAKLSYR--GRAFATVPIEVSSV-EAGNadqfdt1tsdalglvgvpaavav 176  
ident | |  
Sbjct ---ETKFMGVCQLPSKndEKEYPHRRIDIRLlpKDQY----- 256  
DSSP ---LEEEEEELLLL11111111111HHHHHHHHHHLL-----

DSSP ee11hHHHHhhhhhh1111111111HHHHHHH-----hHHhh  
Query pcxtiPWQIaqlhavlavleekandraHDLVLDLQ-----llegl 217  
ident | |  
Sbjct ---yCGVL-----yftgSDIFNKNmrahalekgftineytirplgvtg 296  
DSSP ---hHHHH-----hhl1LHHHHHHhhhhhh11ee1111ee1111

DSSP 11hHHHHhhHHHHhhhhhh1111LLLLL1111hhhhhhhh1111111111hhhhhh  
Query 1ldADLXptRSACIaifearaqhpWPPRVat1phwpliyagalegldhlelartvdaaaq 277  
ident |  
Sbjct vagEPLP--VDSEK-----difDYIQW----- 316  
DSSP 1111LLL--LLLH-----hHHHLLL-----

DSSP hhhhhhhhh1111  
Query avqrfvaridratkr 292  
ident

Sbjct -----kyrepkdrse 326  
DSSP -----1111hhh111

No 76: Query=mol1A Sbjct=4klgA Z-score=7.1

[back to top](#)

DSSP -----  
Query ----- 0  
ident -----  
Sbjct tlnngitdmltelanfeknvsqaihkynayrkaasviakypkhiksgaeakklpgvgtki 60  
DSSP 111hhhhhhhhhhhhhhhh111hhhhhhhhhhhhhhhh1111111hhhhhh11111hhhh

DSSP -----111111111hh  
Query -----aapyspptnlr 12  
ident -----  
Sbjct aekideflatgklrklekirddtssinflttrvsgigpsaarkfvdegiktledlrkne 120  
DSSP hhhhhhhhhhh111hhhhhhhhhhhhhhhhhh1111111hhhhhhhhhh1111hhhhhhhh

DSSP hhhhhhhhhhh1111hhhhhhHHHHHHHHHHHHHHH-LLLL11LLLEEHEHHHHHHhh11  
Query slrdrltqvaerqgvfgrlqRHXIVVAQFAA-TLTDdtGAPLLLVKGSSELELrrgi 71  
ident | |  
Sbjct dklnhhqrigrlykgdfekriPREEMLQMQDIVLnEVKKvdSEYIATVCGSFRRGA---- 176  
DSSP hhl1hhhhhhhh1hhhh111eEHHHHHHHHHHHHHHHHhh1LLEEHEHHHLLL----

DSSP 1111LLLEEEL-----1LHHHHHHHHHHHHhh1111eeEELLEEEL111  
Query pdsrTSKDFATVAR-----rDIELIHEQLADAGetgwegftAIFTAPEEiaap 119  
ident | | | | |  
Sbjct --eSSGDMVLLThpsftsestkqpkLLHQVVEQLQKVH-----FITDTLSKG--- 222  
DSSP ---1EELLEEEL111111111111111111HHHHHHHHHHHLL-----LEEEEL---

DSSP 1111LLLEEEEEEL--LEEEEL-----LLLL1111eellhhhh1111lee  
Query gxpVKKRRFTAKLSYR--GRAFATVPIEVSSV-EAGNadqfdtltsdalglvsvpavav 176  
ident | |  
Sbjct ---ETKFMGVCQLPSKndEKEYPHRRIDIRLIpKDQY----- 256  
DSSP ---LLEEEELLLL1111111111111111HHHH-----

DSSP eellHHHHHHhhhhhhhh111111111111111111HHHHHHH-----hhhhh  
Query pcxtiPWQIaqlhavtavllepandraHDLVDLQ-----llegl 217  
ident | |  
Sbjct ---yCGVL-----yftgSDIFNKNmrahailegftineytirplvgtg 296  
DSSP ---hHHHH-----hhhlHHHHHHhhhhhhhhllleeell1111111

DSSP 11hHHHHhhHHHHhhhhhh1111LLLL11111hhhhhhhh1111111111hhhhhh  
Query 11dADLXptRSACIaifearaqhpWPPRVatlpwpliYagaleghleartvdaaaq 277  
ident | |  
Sbjct vagEPLP--VDSEK-----difDYIQW----- 316  
DSSP 111LLL--LLHH-----hhHHLLL-----

DSSP hhhhhhhhhhh1111  
Query avqrfvaridratkr 292  
ident  
Sbjct -----kyrepkdrse 326  
DSSP -----1111hhh111

No 77: Query=mol1A Sbjct=3v7jA Z-score=7.1

[back to top](#)

DSSP -----  
Query ----- 0  
ident -----  
Sbjct etlnngitdmlvelanfeknvsqaihkynayrkaasviakypkhiksgaeakklpgvgtk 60  
DSSP 1111hhhhhhhhhhhhhhhh111hhhhhhhhhhhhhhhh1111111hhhhhh11111hh

DSSP -----111111111h



DSSP EL111111LLEEEEEEEELL--EEEEEEEEEEEL-LLLL1111eeeee1hhhh1111  
Query EIaapgxpVKPRRFTAKLSYRG--RAFATVPIEVSSV-EAGNadqfdtlttsdalglvgvp 171  
ident | |  
Sbjct KG-----ETKFMGVCQLPSEndeNEYPHRRIDIRLIpKDQY----- 261  
DSSP EL-----LLEEEEEELLLLL1111LLEEEEEEEEL1HHHH-----

DSSP l1eeree1hHHHHhhhhhh111111111111hhhhHHHHHH-----  
Query aavavpcxtiPWQIaqlhavlavleepkandrahd1vDLQLE----- 215  
ident |  
Sbjct -----yCGVL-----yftgSDIFNKnmrahalekgftiney 292  
DSSP -----hHHHH-----hhhlLHHHHhhhhhhhh1lee111

DSSP -----hh11hhhhhhhhHHHHhhhhhh1111LLELL1111hhhhhhhh11111111  
Query -----gllldadlxptrSACIaifearaqhpWPPRVatlphwpliyagalegldhlela 269  
ident |  
Sbjct tirplgvtgvageplpvdSEQD-----ifdYIQWR----- 322  
DSSP leee111111111111LHHH-----hhHLLLL-----

DSSP 11hhhhhhhhhhhhhh1111  
Query rtvdaaaqavqrfvaridratkr 292  
ident |  
Sbjct -----yrepkdrse 331  
DSSP -----111hh111

No 79: Query=mol1A Sbjct=3oguA Z-score=7.1

[back to top](#)

DSSP -----  
Query ----- 0  
ident |  
Sbjct tlnggitdmltelanfeknvsqaihkynayrkaasviakyphkiksgaeakklpgvgtki 60  
DSSP 111hhhhhhhhhhhhhh111hhhhhhhhhhhhhh111111hhhh111111hh

DSSP -----111111111hh  
Query -----aapyspntlr 12  
ident |  
Sbjct aekideflatgkrlrklekirddtssinlltrvsgigpsaarkfvdegiktledlrkne 120  
DSSP hhhhhhhhh111hhhhhhhh1hhhhhhhh111111hhhhhhhh1111hhhhhh1h

DSSP hhhhhhhhhhh1111hhhhHHHHHHHHHHHH--LLLL11LLEEEHHHHHHHHh11  
Query slrdrltqvaerqgvfgrlqRHVAXIVVAQFAA-TLTDdtGAPLLLVKGGSSLELrri 71  
ident | |  
Sbjct dklnhhqriglkyfgdfekriPREEMLMQDIVLnEVKkvdSEYIATVCGSFRRGA---- 176  
DSSP hh11hhhhhhhh1hhhh11eEHHHHHHHHHHHHHHHHhh1LLEEEELHHHHLL----

DSSP 1111LLEEEEEEL-----1LHHHHHHHHHHHHhh1111eeEEELLEEL111  
Query pdsrTSKDFATVAR-----rDIELIHEQLADAGetgwegftAIFTAPEEaap 119  
ident | | | |  
Sbjct ---eSSGDMDVLLThpsftsestkpqkLLHQVVEQLQKVH-----FITDTLSKG--- 222  
DSSP ---1EELLEEEEEEL1111111111hhHHHHHHHHHHLL-----LEEEEEEL---

DSSP 111LLEEEEEEEEL--LEEEEEEEEEEL-LLLL1111eeree1hhhh1111lee  
Query gxpVKPRRFTAKLSYR--GRAFATVPIEVSSV-EAGNadqfdtlttsdalglvgvpaav 176  
ident | |  
Sbjct ---KTKFMGVCQLPSKndEKEYPHRRIDIRLIpKDQY----- 256  
DSSP ---LLEEEEEELLLLL11LLEEEEEEEEL1HHHH-----

DSSP eel1hHHHHhhhhhh111111111111hhhhHHHHHH-----  
Query pcxtiPWQIaqlhavlavleepkandrahd1vDLQLE----- 215  
ident |  
Sbjct ---yCGML-----yftgSDIFNKnmrahalekgftineytirpl 292  
DSSP ---hHHHH-----hhhlLHHHHhhhhhhhh1lee111lee1

DSSP -hh11hhhhhhhhHHHHhhhhhh1111LLELL1111hhhhhhhh1111111111hh  
Query -gllldadlxptrSACIaifearaqhpWPPRVatlphwpliyagalegldhlelartvda 274

ident |  
Sbjct gvtgvageplpvdSEKD-----ifdYIQWK----- 317  
DSSP 111111111111LHHH-----hhHLLLL-----

DSSP hhhhhhhhhhhhhhh1111  
Query aaqavqrfvaridratkr 292  
ident  
Sbjct -----yrepkdrse 326  
DSSP -----111hhhh111

No 80: Query=mol1A Sbjct=3rjeA Z-score=7.1

[back to top](#)

DSSP ----- 0  
Query -----  
ident  
Sbjct pqtlnngitdmltelanfeknvsqaihkynayrkaasviakypkiksgaeaklpgvgt 60  
DSSP 11111hhhhhhhhhhhhhhhh1111hhhhhhhhhhhhhhhh111111hhhhhh11111h

DSSP -----1111111111  
Query -----aapyspptn 10  
ident  
Sbjct kiaekideflatgklrklekirkddtsssinfltrvsgigpsaarkfvdegiktledlrk 120  
DSSP hhhhhhhhhhhhh111hhhhhhhhhhhhhhhh111111hhhhhhhhhh1111hhhhhh1

DSSP hhhhhhhhhhhhhhh1111hhhhhhHHHHHHHHHHHHH-LLLL11LLLEEEHHHHHHHHhh  
Query lrsldrdr1tqvaerqgvfgrlqRHVAXIVVAQFAA-TLTDdtGAPLLLVKGGSSLELrr 69  
ident | |  
Sbjct nedklnhhqriglkyfgdfekriPREEMLQMQDIVLnEVKKvdSEYIATVCGSFRRGA-- 178  
DSSP 1hhh11hhhhhhhh11hhhh111eHHHHHHHHHHHHHHHHHH11LLLEEEELLHHHHLL--

DSSP 111111LLLEEEEL-----1LHHHHHHHHHHHHhh1111eeEEELLEEL  
Query gipdsrTSKDFATVAR-----rDIELIHEQLADAGetgwegftAIFTAPEE Ia 117  
ident | | | |  
Sbjct -----eSSGDMDVLLThpsftsestqpkLLHQVVEQLQKVH-----FITDTLSKG- 224  
DSSP -----1EELLEEEEL111111111111HHHHHHHHHHLL-----LEEEEEEEL-

DSSP 11111LLLEEEEEEEL--LEEEEEEELLLL111111111111eeehhhhh111111ee  
Query apgxpVKPRRFTAKLSYR--GRAFATVPIEVSSVEAGNAdqfdt1tsdalglvgpaava 175  
ident | |  
Sbjct -----ETKFMGVCQLPSKndEKEYPHRRIDIRLIPKDQY----- 258  
DSSP -----LLEEEEEE111111111111LLLEEEEEEELHHHH-----

DSSP ee11hHHHHhhhhhhhh111111111111hhhhHHHHHH-----  
Query vpcxtiPWQIaqklhavlavlepkandrahd1vDLQLE----- 215  
ident  
Sbjct -----yCGVL-----yftgSDIFNKnmrahalekgftineytirp 293  
DSSP -----hHHHH-----hhh1LHHHHhhhhhhhh11lee1111ee

DSSP --hh11hhhhhhhhHHHHhhhhhh111111111111hhhhhhhh1111111111hh  
Query --g111dadlxptrSACIaifearaqhPWPPRVat1phwplyagalegldhlelartvd 273  
ident |  
Sbjct lgvgtvageplpvdSEKD-----ifdYIQWK----- 319  
DSSP 111111111111LHHH-----hhHLLLL-----

DSSP hhhhhhhhhhhhhhh1111  
Query aaaqavqrfvaridratkr 292  
ident  
Sbjct -----yrepkdrse 328  
DSSP -----111hhhh111

No 81: Query=mol1A Sbjct=4f5oA Z-score=7.1

[back to top](#)

```

DSSP -----
Query ----- 0
ident
Sbjct tlnggitdmltelanfeknvsqaihkynayrkaasviakyphkiksgaeakklpgvgtki 60
DSSP 111hhhhhhhhhhhhhhhhhhhh111hhhhhhhhhhhhhhhh1111111hhhhh11111hhh

DSSP -----11111111hh
Query -----aapyspntlr 12
ident
Sbjct aekideflatgklrklekirqddtsssinfltrvsgigpsaarkfvdegiktledlrkne 120
DSSP hhhhhhhhhhh111hhhhhhhhhhhhhhhhhh1111111hhhhhhhhhh11111hhhhhhhh

DSSP hhhhhhhhhhh1111hhhhhhHHHHHHHHHHHHHH-LLLL111LLLEEEHHHHHHHHhh11
Query slrdrltqvaerqgvfgrlqRHVAXIVVAQFAA-TLTDdtGAPLLLVKGGSSLELrrgi 71
ident | |
Sbjct dklnhhqriglkyfgdfekriPREEMLQMQDIVLnEVKKvdSEYIATVCGSFRRGA---- 176
DSSP hhh11hhhhhhhh11hhhhhh11eEHHHHHHHHHHHHHHHHHH11LLLEEEELHHHHLL----

DSSP 1111LLLEEEEL-----1LHHHHHHHHHHHHhh1111eeEELLLEEL11111L
Query pdsrTSKFATVAR-----rDIELIHEQLADAGetgwegftAIFTAPEEIIaapgxpv 123
ident | | | | |
Sbjct ---eSSGDMDVLLThpsf tseskLLHQVVEQLQKVH-----FITDTLSKG-----E 219
DSSP ---1EELLEEEEEE11111111HHHHHHHHHHHLL-----LEEEEEEEL-----L

DSSP LLEEEEEEEEL-LLEEEEEEEELLLLLL11leeeelhhhh11111leeeelhh
Query KPRRFTAKLSYR-GRAFATVPIEVSSVEAGNAqfdtlttsdalglvgpaavavpcxtiP 182
ident | |
Sbjct TKFMGVCQLPSKdeKEYPHRRIDIRLIPKDQY-----yC 253
DSSP LEEEEELLLL11111111LEEEEEEELHHHH-----hH

DSSP HHHhhhhhhhh11111111111hhhhHHHHHH-----hhllh
Query WQIaqklhavtavlepkandrahd1vDLQLE-----gllld 220
ident
Sbjct GVL-----yftgSDIFNKnmkahalekgftineytirplvgvtgva 293
DSSP HHH-----hhh1LHHHHHHhhhhhhhh11eeel111eeel111111

DSSP hhhhhhhHHHHhhhhhh11111111111hhhhhhhhhh11111111111hhhhhhhh
Query adlxptrSACIaifearaqhpWPPRVat1phwpliyagaleldhlelartvdaaaqavq 280
ident |
Sbjct ge1pvdSEKD-----ifdYIQWK----- 312
DSSP 1111111LHHH-----hhHLLL-----

DSSP hhhhhhh1111
Query rfvaridratkr 292
ident
Sbjct ---yrepkdrse 321
DSSP ---111hhhh111

```

No 82: Query=mol1A Sbjct=1tvaA Z-score=7.1

[back to top](#)

```

DSSP -----
Query ----- 0
ident
Sbjct kapqetlnggitdmltelanfeknvsqaihkynayrkaasviakyphkiksgaeakklpg 60
DSSP 1111hhhhhhhhhhhhhhhhhhhh111hhhhhhhhhhhhhhhh1111111hhhhh1111

DSSP -----1111111
Query -----aapysp 7
ident
Sbjct vgtkiaekideflatgklrklekirqddtsssinfltrvsgigpsaarkfvdegiktled 120
DSSP 11hhhhhhhhhhhhhh111hhhhhhhhhhhhhhhhhh1111111hhhhhhhhhh11111hhh

DSSP 111hhhhhhhhhhhhhh1111hhhhhhHHHHHHHHHHHH-LLLL111LLLEEEHHHHHH
Query ptnlrslrdrltqvaerqgvfgrlqRHVAXIVVAQFAA-TLTDdtGAPLLLVKGGSSLE 66
ident | |
Sbjct lrknedklnhhqriglkyfgdfekriPREEMLQMQDIVLnEVKKvdSEYIATVCGSFRRG 180

```



```

Query cxtiPwQIaqkInavtavileepkandrandivDLQLE----- 215
ident
Sbjct ---yCGVL-----yftgSDIFNKnmkahalekgftineytirplg 292
DSSP ---hHHHH-----hhh1LHHHHhhhhhhhh1lee1111lee11

DSSP hh11hhhhhhhhHHHHhhhhhh1111LLLLL1111hhhhhhhh11111111hhhh
Query g11ldadlxptrSACIaifearaqhpWPPRVat1phwpliyagalegldhleartvdaa 275
ident
Sbjct vtgvageplpvdSEKD-----ifdYIQWK----- 316
DSSP 1111111111LHHH-----hhhHLLL-----

DSSP hhhhhhhhhhh1111
Query aqavqrfvaridratkr 292
ident
Sbjct -----yrepkdrse 325
DSSP -----111hh111

```

No 84: Query=mol1A Sbjct=4gxiA Z-score=7.1

[back to top](#)

```

DSSP -----
Query ----- 0
ident
Sbjct pqtlnngitdmltelanfeknvqsaihknayrkaasviakyphkiksgaeaklpgvgt 60
DSSP 11111hhhhhhhhhhhhhh1111hhhhhhhhhhhhhh11111hhhh11111h

DSSP -----1111111111
Query -----aapyspptn 10
ident
Sbjct kiaekideflatgklrklekirkqddtssinfltrvsgigpsaarkfvdegiktledlrk 120
DSSP hhhhhhhhhhh111hhhhhhhh1hhhhhhhh111111hhhhhhhh1111hhhhhh

DSSP hhhhhhhhhhh1111hhhhHHHHHHHHHHHH-LLLL11LLLEEEHHHHHHHHhh
Query lrs1rdrltqvaerqgvfgrlqRHVAXIVVAQFAA-TLTDdtGAPLLLKGGSSLELrr 69
ident
Sbjct nedklnhhqriglkyfgdfekriPREEMLQMqDIVLnEVKKvdSEYIATVCGSFRRA-- 178
DSSP 1hhh1hhhhhhhh1hhhh111eHHHHHHHHHHHHHHHHH1LLLEEEELLLL--

DSSP 11111LLLEEEEL-----1LHHHHHHHHHHHHhh1111eeEEELLEEL1
Query gipdsrTSKDFATVAR-----rDIELIHEQLADAGetgwegftAIFTAPEE1a 117
ident
Sbjct -----eSSGDMVLLThpsftsEstkqpkLLHQVVEQLQKVH-----FITDTLSKG- 224
DSSP -----1EELLEEEL1111111111HHHHHHHHHHLL-----LEEEEL-

DSSP 1111LLLEEEEL--EEEEEEEEELLLL1111eeehhh1111lee
Query apgxpVKPRRFTAKLSYRG--RAFATVPIEVSSVEAGNAdqfdt1tsdalglvgpaava 175
ident
Sbjct -----ETKFMGVCQLPSKNdeKEYPHRRIDIRLIPKDQY----- 258
DSSP -----LLEEEELLLL11LLLEEEELHHHH-----

DSSP eeellHHHHhhhhhh1111111111hhhhHHHHHH-----
Query vpcxtiPwQIaqklhavtavileepkandrahd1vDLQLE----- 215
ident
Sbjct ---yCGVL-----yftgSDIFNKnmkahalekgftineytirp 293
DSSP ---hHHHH-----hhh1LHHHHhhhhhh1lee1111lee

DSSP --hh1hhhhhhhhHHHHhhhhhh1111LLLLL11111hhhhhhhh11111111hh
Query --g11ldadlxptrSACIaifearaqhpWPPRVat1phwpliyagalegldhleartvd 273
ident
Sbjct lgvtgvageplpvdSEKD-----ifdYIQWK----- 319
DSSP 1111111111LHHH-----hhhHLLL-----

DSSP hhhhhhhhhhh1111
Query aaaqavqrfvaridratkr 292
ident
Sbjct -----yrepkdrse 328
DSSP -----111hh111

```





```

Sbjct FKEEMLQMVDIVLnEVKkIGREYIAIVCGSFRRGA-----eSSGDMVDVLLInpnttse 113
DSSP EHHHHHHHHHHHHHHHHHHh1LLEEEELHHHHLLL-----LEELLEEEEEEL111111

DSSP -----1LHHHHHHHHHHHHhh1111eeEEELLEEL111111LLEEEEEEEELLeEEE
Query -----rDIELIHEQLADAGetgwegftAIFTAPEEIIaapgxpVKPRRFTAKLSYRGrAFA 140
ident          |||          |          |
Sbjct sskqpkLLHRVVEQLQKVR-----FITDTLSKG-----ETKFMGVCQLPSEN-EYP 158
DSSP 1111hhHHHHHHHHHHHL-----LEEEEEEL-----LLEEEEEELLLLL-LLL

DSSP EEEEEEEEL-LLLL1111eeeee1hHHHh111111eeeee1hHHHHhhhhhh111111
Query TVPIEVSSV-EAGNadqfdt1tsdalglvgvpaavavpcxtiPWQIaqlhavtavleep 199
ident  |
Sbjct HRRIDIRLIpKDQY-----yCGVL----- 177
DSSP LEEEEEEEL1LLH-----hHHHH-----

DSSP 11111hhhhHHHHHH-----hh11hhhhhhhhHHHHhhhhhh
Query kandrahdlvDLQLE-----g11dadlxptrSACIaifear 237
ident
Sbjct -----yftgSDIFNKNmrahalekgftineytirplgvtgvageplpvdSEQD----- 225
DSSP -----h111LHHHHHHhhhhhh11eeel111eeel1111111111111111LLHH-----

DSSP 1111LLL11111hhhhhhhh1111111111hhhhhhhhhhhhhh1111
Query aqhpWPPRvatlphwpliYagalegldhlelartvdaaaqavqrFvaridratkr 292
ident
Sbjct -ifdYIQW-----ryrepkdrse 242
DSSP -hhhHLL-----1111hhhh11

```

No 87: Query=mol1A Sbjct=2fmpA Z-score=7.1

[back to top](#)

```

DSSP -----
Query ----- 0
ident -----
Sbjct tlnggitdmltelanfeknvsqaihkynayrkaasviakyphkiksgaeakklpgvgtki 60
DSSP 111hhhhhhhhhhhhhh111hhhhhhhhhhhhhh111111hhhh11111hhhh

DSSP -----111111111hh
Query -----aapyspntlr 12
ident -----
Sbjct aekideflatgklrklekirqdtssinfltrvsgigpsaarkfvdegiktledlrkne 120
DSSP hhhhhhhhh111hhhhhhhh1hhhhhhhh111111hhhhhhhh11111hhhh11h

DSSP hhhhhhhhhhh1111hhhhHHHHHHHHHHHHHH-LLLL111LLEEEHHHHHHHHhh11
Query slrdrltqvaerqgvfgrlqRHVAXIVVAQFAA-TLTDdtGAPLLLKVGGSSELELrgi 71
ident          |
Sbjct dklnhhqriglkyfgdfekriPREEMLQMVDIVLnEVKkvdSEYIATVCGSFRRGA---- 176
DSSP hh11hhhhhhhh1hhhh111eEHHHHHHHHHHHHHHHHHH1LLEEEELHHHHLLL-----

DSSP 1111LLEEEEEEL-----1LHHHHHHHHHHHHhh1111eeEEELLEEL111
Query pdsrTSKDFATVAR-----rDIELIHEQLADAGetgwegftAIFTAPEEIIaap 119
ident  | |          |
Sbjct ---eSSGDMVDVLLThpsftsestqpkLLHQVVEQLQKVH-----FITDTLSKG--- 222
DSSP ---1EELLEEEEEEL111111111111HHHHHHHHHHLLL-----LEEEEEEL---

DSSP 111LLEEEEEEEEL--LEEEEEEEEEEEL-LLLL1111eeeee1hHHH111111ee
Query gxpVKPRRFTAKLSYR--GRAFATVPIEVSSV-EAGNadqfdt1tsdalglvgvpaavav 176
ident          |
Sbjct ---ETKFMGVCQLPSKndEKEYPHRRIDIRLIpKDQY----- 256
DSSP ---LLEEEEEELLLLL1111LLEEEEEEL1HHHH-----

DSSP eellhHHHHhhhhhh1111111111HHHHHH-----hhhhh
Query pcxtiPWQIaqlhavtavleepkandraHDLVDLQ-----llegl 217
ident          |
Sbjct ---yCGVL-----yftgSDIFNKNmrahalekgftineytirplgvtg 296
DSSP ---hHHHH-----hh1LHHHHHHhhhhhh11eeel111eeel1111

```



[back to top](#)

```
DSSP -----
Query ----- 0
ident
Sbjct tlnggitdmltelanfeknvsqaihkynayrkaasviakyphkiksgaeakklpgvgtki 60
DSSP 111hhhhhhhhhhhhhhhh111hhhhhhhhhhhhhhhh1111111hhhh111111hhhh

DSSP -----111111111hh
Query -----aapysspntlr 12
ident
Sbjct aekideflatgklrklekirqddtsssinfltrvsgigpsaarkfvdegiktledlrkne 120
DSSP hhhhhhhhh111hhhhhhhhhhhhhhhh1111111hhhhhhhh11111hhhhhhhh1h

DSSP hhhhhhhhhhh1111hhhhHHHHHHHHHHHHHH-LLLL111LLLEEEHHHHHHHHhh11
Query slrdrltqvaerqgvfgrlqRHVAXIVVAQFAA-TLTDdtGAPLLLKGGSSLELrrgi 71
ident
Sbjct dklnhhqriglkyfgdfekriPREEMLMQDIVLnEVKKvdSEYIATVCGSFRRGA---- 176
DSSP hhl1hhhhhhhh111hhhl1eHHHHHHHHHHHHHHHHHH11LLEEEELHHHHLLL----

DSSP 1111LLLEEEEEEEL-----1LHHHHHHHHHHHHhh111leeEEELLEEEL111
Query pdsrTSKDFATVAR-----rDIELIHEQLADAGetgwegftAIFTAPEElaap 119
ident
Sbjct ---eSSGDMDVLLThpsftsestkpqkLLHQVVEQLQKVH-----FITDTLSKG--- 222
DSSP ---1EELLEEEL1111111111111111HHHHHHHHHHHLL-----LEEEEEEEL---

DSSP 111LLLEEEEEEEL--LEEEEEEEL-LLLL111leeeelhhhh1111leee
Query gxpVKPRRFTAKLSYR--GRAFATVPIEVSSV-EAGNadqfdtlttsdalglvqpaavav 176
ident
Sbjct ---ETKFMGVCQLPSKndEKEYPHRRIDIRLIpKDQY----- 256
DSSP ---LLEEEEEEELLLL111LLLEEEEEEEL1HHHH-----

DSSP eellHHHHHHhhhhhh1111111111HHHHHHH-----hhhhh
Query pcxtiPWQIaqkIhavtavleepkandraHDLVDLQ-----llegl 217
ident
Sbjct ----yCGVL-----yftgSDIFNKNmrahaalekgftineytirplvgtg 296
DSSP ----hHHHH-----hhhlHHHHHHhhhhhh11leel11leel1111

DSSP 11hHHHHHHHHHHhhhhhh1111111111hhhhhhhh1111111111hhhhhh
Query 1ldADLXptRSACIaifearaqhpWPPRVatlpwpliyagalegldhlelartvdaaaq 277
ident
Sbjct vagEPLP--VDSEK-----difDYIQW----- 316
DSSP 111LLL--LLLHH-----hhHLLL-----

DSSP hhhhhhhhh1111
Query avqrfvaridratkr 292
ident
Sbjct ----kyrepkdrse 326
DSSP ----1111hh111
```

No 90: Query=mol1A Sbjct=5j2dA Z-score=7.1

[back to top](#)

```
DSSP -----
Query ----- 0
ident
Sbjct tlnggitdmltelanfeknvsqaihkynayrkaasviakyphkiksgaeakklpgvgtki 60
DSSP 111hhhhhhhhhhhhhhhh111hhhhhhhhhhhhhhhh1111111hhhh111111hhhh

DSSP -----111111111hh
Query -----aapysspntlr 12
ident
Sbjct aekideflatgklrklekirqddtsssinfltrvsgigpsaarkfvdegiktledlrkne 120
DSSP hhhhhhhhh111hhhhhhhhhhhhhhhh1111111hhhhhhhh11111hhhhhhhh1h

DSSP hhhhhhhhhhh1111hhhhHHHHHHHHHHHHHH-LLLL111LLLEEEHHHHHHHHhh11
Query slrdrltqvaerqgvfgrlqRHVAXIVVAQFAA-TLTDdtGAPLLLKGGSSLELrrgi 71
```

ident  
Sbjct dklnhhqriglkyfgdfekriPREEMLQMQDIVLnEVKkVdSEYIATVCGSFRRGA---- 176  
DSSP hhlhhhhhhhhhhhhhhhhhh11eEHHHHHHHHHHHHHHHHHH1LLLEEEELHHHHLL----

DSSP 1111LLLEEEEL-----1LHHHHHHHHHHHHhh1111eeEEELLLEE1111  
Query pdsrTSKDFATVAR-----rDIELIHEQLADAGetgwegftAIFTAPEEiaap 119  
ident | | | | |  
Sbjct --eSSGDMVLLThpsftssetkqpkLLHQVVEQLQKVH-----FIDTLSK---- 221  
DSSP ---1EELLEEEEEE111111111111HHHHHHHHHHHLL-----LEEEEEE----

DSSP 1111LEEEEEEEL--LEEEEEEEL-LLLL1111eeeeelhhh1111leee  
Query gxpVKPRRFATKLSYR--GRAFATVPIEVSSV-EAGNadqfdtltsdalglvgvpaavav 176  
ident | | | | |  
Sbjct --gETKFMGVCQLPSKndEKEYPHRRIDIRLpKDQY----- 256  
DSSP --1LEEEEEEELLLL11LLLEEEEEEEL1HHHH-----

DSSP eellHHHHHHhhhhhhhh1111111111HHHH-----hhhhhhh  
Query pcxtiPWQIaqklhavtavleepkandraHDLV-----dlqllegl 217  
ident | | | | |  
Sbjct ---yCGVL-----yftgSDIFnknmrahalekgftineyrtirplgvtg 296  
DSSP ---hHHHH-----hhh1LHHHHhhhhhhhh1leee1111ee1111

DSSP 1hhHHHHhhHHHHhhhhhh1111LLLLL1111hhhhhhhh11111111hhhhhh  
Query llADLXPtrSACIaifearaqhpPPRVatlpwpliyagalegldhleartvdaaaq 277  
ident | | | | |  
Sbjct vagEPLPV--DSEK----difdYIQWKY----- 318  
DSSP 1111LLL--LHH-----hhhhLLLLL

DSSP hhhhhhhhh1111  
Query avqrfvaridratkr 292  
ident  
Sbjct -----repkdrse 326  
DSSP -----11hhh111

No 91: Query=mol1A Sbjct=4m2yA Z-score=7.1

[back to top](#)

DSSP ----- 0  
Query -----  
ident  
Sbjct lnggitdmltelanfeknvsqaihknayrkaasviakyphkiksgaeaklpgvgtkia 60  
DSSP 11hhhhhhhhhhhhhhhh1111hhhhhhhhhhhhhh111111hhhhhh11111hhhh

DSSP -----11111111hhhh  
Query -----aapyspptnlrs 13  
ident  
Sbjct ekideflatgklrklekirkddtssinfltrvsgigpsaarkfvddegiktledlrkned 120  
DSSP hhhhhhhhh11hhhhhhhh1hhhhhhhh111111hhhhhhhh11111hhhh11hh

DSSP hhhhhhhhhhh111hhhhHHHHHHHHHHHLL-LLLL1LLLEEEHHHHHHhh111  
Query lrdr1tqaerqgvfgrlqrHVXIVVAQFAAT-LTDDtGAPLLLVKGGSSLELrrgip 72  
ident | | | | |  
Sbjct klnhhqriglkyfgdfekriPREEMLQMQDIVLnEVKkVdSEYIATVCGSFRRGA---- 175  
DSSP h11hhhhhhhhhhhhhh111eEHHHHHHHHHHHHHHHHH1LLLEEEELHHHHLL----

DSSP 1111LLLEEEEL-----1LHHHHHHHHHHHHhh1111eeEEELLLEEL111111LL  
Query dsrTSKDFATVAR-----rDIELIHEQLADAGetgwegftAIFTAPEEiaapgxpVK 124  
ident | | | | |  
Sbjct --eSSGDMVLLThpsftssetkqpkLLHQVVEQLQKVH-----FIDTLSKG-----ET 219  
DSSP --1EELLEEEEEE111111111111HHHHHHHHHHHLL-----LEEEEEEEL-----LL

DSSP LEEEEEEELLEEEEEEEL-LLLL1111eeeeelhhh1111leeeel1hHH  
Query PRRFTAKLSYRGRAFATVPIEVSSV-EAGNadqfdtltsdalglvgvpaavpcxtiPW 183  
ident | | | | |  
Sbjct KFMGVCQLPSDEKEYPHRRIDIRLpKDQY-----yCG 252  
DSSP EEEEEELLLL11LLLEEEEEEEL1HHHH-----hhh











Sbjct L-----yftgSDIFNKNmrahalekgftineytirplgtvagerLr--- 292  
DSSP H-----hhh1LHHHHHHHHHHHHHHH1leeel11leeel111111LLLL--L

DSSP HHHHHHHHHH1111LLLLL1111HHHHHHHH1111111111HHHHHHHHHHHHHHH  
Query SACIaifearaqhpWPPRVAtlphwpliayaglegldhlelartvdaaaqavqrfvarid 287  
ident  
Sbjct DSEK-----difDYIQWK-----yrep 309  
DSSP LLHH-----hhhHHHLLL-----111h

DSSP h1111  
Query ratkr 292  
ident  
Sbjct kdrse 314  
DSSP hh111

No 98: Query=mol1A Sbjct=4nlzA Z-score=7.1

[back to top](#)

DSSP -----  
Query ----- 0  
ident  
Sbjct etlnggitdmltelanfeknvsqaihknayrkaasviakyphkiksgaeakklpgvgtk 60  
DSSP 1111HHHHHHHHHHHHHHH1111HHHHHHHHHHHHH11111111HHHHH111111h

DSSP -----111111111h  
Query -----aapyspsptnl 11  
ident  
Sbjct iaekideflatgklrklekirqddtsssinfltrvsgigpsaarkfvdegiktledlrkn 120  
DSSP hhhhhhhhhhh111HHHHHHHHHHHHHHH111111HHHHHHHHH1111HHHHH11

DSSP hhhhhhhhhhh1111hHHHHHHHHHHHHHHHLLLLLLLLEEEHHHHHHHHH1  
Query rslrdrltqvaerqgvfGRLQRHVAXIVVAQFAAT-LTDDTGAPLLLVKGGSSLELrrg 70  
ident  
Sbjct edklnhhqriglkyfgdfEKRIPREEMLQMQDIVLNeVKKVDSEYIATVCGSFRGA--- 177  
DSSP hhh11HHHHHHHHHHHLLLEEHHHHHHHHHHHHHHLLLEEEELHHHHLLL---

DSSP 11111LLEEEEEEEL-----1LHHHHHHHHHHHHHh1111leeEELL-LEEL1111  
Query ipdsrTSKDFATVAR-----rDIELIHEQLADAGetgwegftaIFTA-PEElaapg 120  
ident  
Sbjct ---eSSGDMDVLLThpsftsesqkLLHQVVEQLQKVH-----FITDtLSKG---- 220  
DSSP ----1EELEEEEEE111111111HHHHHHHHHHHLL-----LEEEeEEEL----

DSSP 11LLEEEEEEEL-LEEEEEEEEEEEL-LLLL1111eeeeelhhh11111eeeee  
Query xpVKPRRFTAKLSYR-GRAFATVPIEVSSV-EAGNadqfdt1tsdalglvgvpaavavpc 178  
ident  
Sbjct --ETKFMGVCQLPSKdEKEYPHRRIDIRLlpKDQY----- 253  
DSSP --LLEEEEEEELLLL1LLLLLLEEEEEEEL1HHHH-----

DSSP 11HHHHHHHHHHH1111111111HHHHHHH-----HHHHH11  
Query xtiPWQIaqklhavtavleekandraHDLVLDLQ-----1leg111 219  
ident  
Sbjct --yCGVL-----yftgSDIFNKNmrahalekgftineytirplgtvga 295  
DSSP --HHHHH-----hh1LHHHHHHHHHHHHH1leeel11leeel111111

DSSP hHHHHhhHHHHHHHHHHH1111LLLLL1111HHHHHHHH1111111111HHHHHHH  
Query dADLXptRSACIaifearaqhpWPPRVAtlphwpliayaglegldhlelartvdaaaqav 279  
ident  
Sbjct gEPLP--VDSEK-----difDYIQW----- 313  
DSSP 1LLL--LLLH-----hhhHHLLL-----

DSSP hhhhhhh1111  
Query qrfvaridrskr 292  
ident  
Sbjct ---kyrepkdrse 323  
DSSP ---1111hh111

No 99: Query=mol1A Sbjct=4nmZA Z-score=7.1

[back to top](#)

```
DSSP -----
Query ----- 0
ident -----
Sbjct  nggitdmltelanfeknvsqaihkyayrkaasviakypkiksgaeakklpgvgtkiae 60
DSSP  1hhhhhhhhhhhhhhhhhh1111hhhhhhhhhhhhhhhh1111111hhhhh11111hhhhh
```

```
DSSP -----111111111hhhh
Query -----aapyspptnlrsl 14
ident -----
Sbjct  kideflatgklrklekirqddtsssinf1trvsgigpsaarkfvdegiktledlrknek 120
DSSP  hhhhhhhhh111hhhhhhhh11hhhhhhhh1111111hhhhhhhh1111hhhhh11hhh
```

```
DSSP  hhhhhhhhh1111hHHHHHHHHHHHHHHHHHLL-LLLLLLLLLEEEHHHHHHHHhh1111
Query  rdrltqvaerqgvvfgRLQRHVAXIVVAQFAAT-LTDDTGAPLLLKGGSSLELrrgipd 73
ident  |
Sbjct  lnhhqrighkyfgdfEKRIPREEMLQMQDIVLNeVKKVDSEYIATVCGSFRRGA----- 174
DSSP  11hhhhhhhh11hhhhLLEEEHHHHHHHHHHHHHHHHHLLLEEEELLLHHHLL-----
```

```
DSSP  11111LEEEEL-----1LHHHHHHHHHHHHhh1111eEEELLEEL11111L
Query  srTSKDFATVAR-----rDIELIHEQLADAGetgwegftAIFTAPEElaapgxPV 123
ident  ||
Sbjct  -eSSGMDVLLThpsftsesqpkLLHQVVEQLQKVH-----FITDTLSKG-----E 219
DSSP  -1EELEEEEEE1111111111HHHHHHHHHHHLL-----LEEEEEEEL-----L
```

```
DSSP  LEEEEEEEEEL-LEEEEEEEEEELLLLLL11111eeeeelhhhh11111eeeeellhH
Query  KPRRFTAKLSYR-GRAFATVPIEVSSVEAGNAdqfdlttsdalglvgvpaavavpcxtiP 182
ident  |
Sbjct  TKFMGVCQLPSKdEKEYPHRRIDIRLIPKDQY-----yC 253
DSSP  LEEEEELLLLL11111LEEEEEEELLLLH-----hh
```

```
DSSP  HHHhhhhhhhh11111111111hhhhHHHHHH-----hh11h
Query  WQIaqklhavtavleekandrahdlvDLQLE-----g111d 220
ident  |
Sbjct  GVL-----yftgSDIFNKnmahalekgftineytirplgvgtgva 293
DSSP  HHH-----hhhlHHHHHHHHHHHHhh11111eeel111eeel111111
```

```
DSSP  hhhhhhhHHHHhhhhhh1111LLLLL11111hhhhhhhhhh111111111hhhhhhhhh
Query  adlxptrSACIaifearaqhPWPPRVat1phwpliyagaleldhlelartvdaaqaqvq 280
ident  |
Sbjct  gep1pvdSEKD-----ifDYIQWK----- 312
DSSP  1111111LHHH-----hhHHHLL-----
```

```
DSSP  hhhhhhh1111
Query  rfvaridratkr 292
ident  |
Sbjct  ---yrepkdrse 321
DSSP  ---111hhh111
```

No 100: Query=mol1A Sbjct=4phdA Z-score=7.1

[back to top](#)

```
DSSP -----
Query ----- 0
ident -----
Sbjct  pqetlmggitdmltelanfeknvsqaihkyayrkaasviakypkiksgaeakklpgvg 60
DSSP  111111hhhhhhhhhhhhhhhh1111hhhhhhhhhhhhhhhh1111111hhhhh1111111
```

```
DSSP -----111111111
Query -----aapysppt 9
ident -----
Sbjct  tkiaekideflatgklrklekirqddtsssinf1trvsgigpsaarkfvdegiktledlr 120
DSSP  hhhhhhhhhhh111hhhhhhhh11hhhhhhhh1111111hhhhhhhh1111hhhhh
```

DSSP lhhhhhhhhhhhhhh1111hhhhhHHHHHHHHHHHHHHH-LLLL11LLLEEEEEHHHHHHHH 68  
Query nlrslrdrltqvaerqgvfgrlqRHVAXIVVAQFAA-TLTDdtGAPLLLKGGSSLELr  
ident | |  
Sbjct knedklnhhqriglkyfgdfekriPREEMLQMQDIVLnEVKKvdSEYIATVCGSFRRGA- 179  
DSSP 11hhhh11hhhhhhhh11hhhh111eEHHHHHHHHHHHHHHHHHh11LEEEELHHHHLLL-

DSSP h111111LLLEEEEL-----1LHHHHHHHHHHHHhh1111eeEELLEEL11 118  
Query rgipdsRTSKDFATVAR-----rDIELIHEQLADAGetgwegftAIFTAPEEiaa  
ident | | | | |  
Sbjct -----ESSGMDVLLThpsftsesqpkLLHQVVEQLQKVH-----FITDTLSK--- 222  
DSSP -----LEELLEEEEEE111111111111HHHHHHHHHHHLL-----LEEEEEEE---

DSSP 1111LLLEEEEEEEEL-1EEEEEEEEEEEL-LLLL1111eeee1hhhh1111lee 176  
Query pgxpVKPRRFTAKLSYR-gRAFATVPIEVSSV-EAGNAdqfdt1tsdalglvgvpaavav  
ident | | | | |  
Sbjct ---gETKFMGVCQLPSKdeKEYPHRRIDIRLlPKDQY----- 256  
DSSP ---1LEEEEEELLLL1111LLLEEEEEEEL1HHHH-----

DSSP eellHHHHhhhhhhhh1111111111HHHH-----hhhhhhh 217  
Query pcxtiPWQIaqlkhavtavleepkandraHDLV-----dlqllegl  
ident |  
Sbjct ---yCGVL-----yftgSDIFnknmrahalekgftineytirplgvtg 296  
DSSP ---hHHHH-----hhl1LHHHHhhhhhhhhhh111ee111ee111111

DSSP 11hhHHHHhhHHHHhhhhhh1111LLL111111hhhhhhhhhh1111111111hhhhhh 277  
Query lldaDLXPtRACIAifearaqhPWPPRVatlphwpliyagaleglhdhleartvdaaaq  
ident | | | | |  
Sbjct vagePLPV--DSEKD----ifdYIQWK----- 317  
DSSP 1111LLL--LLHH--hhHLLL-----

DSSP hhhhhhhhhhh1111  
Query avqrfvaridratkr 292  
ident  
Sbjct -----yrepkdrse 326  
DSSP -----111hhhh111

No 101: Query=mol1A Sbjct=4m9hA Z-score=7.1

[back to top](#)

DSSP ----- 0  
Query -----  
ident  
Sbjct lnggitdmltelanfekonvsqaihknayrkaasviakyphkiksgaeaklpgvgtkia 60  
DSSP 11hhhhhhhhhhhhhhhhhh1111hhhhhhhhhhhhhhhh11111111hhhhhh111111hhhh

DSSP -----1111111111hhh 13  
Query -----aaysspptnlrs  
ident  
Sbjct ekideflatgklrklekirqddtssinfltrvsgigpsaarkfvddegiktledlrkned 120  
DSSP hhhhhhhhh1111hhhhhhhh1hhhhhhhh11111111hhhhhhhh111111hhhh11hh

DSSP hhhhhhhhhhh1111hHHHHHHHHHHHHHHHHHH-LLLL11LLLEEEHHHHHHhh111 72  
Query lrdrltqvaerqgvfGRLQRHVAXIVVAQFAA-TLTDdtGAPLLLKGGSSLELrrgip  
ident | |  
Sbjct klnhhqriglkyfgdfEKRIPREEMLQMQDIVLnEVKKvdSEYIATVCGSFRRGA---- 175  
DSSP h11hhhhhhhh11hhhh11LEEHhHHHHHHHHHHHHHh111LEEEELHHHHLLL-----

DSSP 111LLLEEEEL-----1LHHHHHHHHHHHHhh1111eeEELLEEL111111LLE 126  
Query dsrTSKDFATVAR-----rDIELIHEQLADAGetgwegftAIFTAPEEiaapgxVKPR  
ident | | | | |  
Sbjct --eSSGMDVLLThpsftskLLHQVVEQLQKVH-----FITDTLSK-----ETKF 219  
DSSP --1EELLEEEEEE111111111111HHHHHHHHHHHLL-----LEEEEEEL-----LLEE

DSSP EEEEEEE11EEEEEEEEEEELLLL111eeee1hhhh111111eeee11hHHHHh  
Query RFTAKLSYrgRAFATVPIEVSSVEAGNAdqfdt1tsdalglvgvpaavavpcxtiPWQIa  
ident | |

SUBJECT MOYVQLFS REIFRRADIDRLIFRDFI YGVVL 200  
 DSSP EEEELLLL--LLLLLEEEEEEELLHHHH-----hHHHH-

DSSP hhhhhh1111111111hhhhHHHHHH-----hh11hhhh  
 Query qklhavtavleepkandrahdldDLQLE-----g11dadlx 224  
 ident  
 Sbjct -----yftgSDIFNKnmrahalekgftinkytirplgvtgvagepl 291  
 DSSP -----hh1LHHHHHHHHHHHH1lee111lee1111111111

DSSP hhhHHHHHHHH1111LLLL11111hhhhhhhh1111111111hhhhhhhhhhhh  
 Query ptrSACIAifearaqhpWPPRVatlphwpliYagalegldhlelartvdaaaqavqrfva 284  
 ident |  
 Sbjct pvdSEKD-----ifdYIQWK----- 306  
 DSSP 111LHHH-----hhHLLL-----

DSSP hhh1111  
 Query ridratkr 292  
 ident  
 Sbjct yrepkdrs 314  
 DSSP 111hhhh1

No 102: Query=mol1A Sbjct=4mfaA Z-score=7.1

[back to top](#)

DSSP -----  
 Query ----- 0  
 ident  
 Sbjct Inggitdmltelanfeknvsqaihkynayrkaasviakyphkiksgaeaklpgvgtkia 60  
 DSSP 11hhhhhhhhhhhhhhhh1111hhhhhhhhhhhhhh111111hhhhhh1111hhhh

DSSP -----1111111111hh  
 Query -----aapyspntlrs 13  
 ident  
 Sbjct ekideflatgklrklekirqddtssinlrvsgigpsarkfvddegiktleldrkned 120  
 DSSP hhhhhhhhh111hhhhhhhh1hhhhhhhh111111hhhhhhhh1111hhhhhh11hh

DSSP hhhhhhhhhhh1111hhhhHHHHHHHHHHHH--LLLL11LLLLEEEHHHHHHhh111  
 Query lrdrltqvaerqgvfgrlqRHVAXIVVAQFAA-TLTDdtGAPLLLVKGGSSLElrrgip 72  
 ident | |  
 Sbjct klnhhqrigrkyfgdfekriPREEMLQMQDIVLnEVKKvdSEYIATVCGSFRRG----- 174  
 DSSP h11hhhhhhhh1hhhh11leEHHHHHHHHHHHHHHHHHh1LLEEEELHHHLL-----

DSSP 1LLLLLLEEEEL-----1LHHHHHHHHHHHHhh111leeEELLEE111111  
 Query dSRTSKDFATVAR-----rDIELIHEQLADAGetgwegftAIFTAPEEiaapgx 122  
 ident | | | |  
 Sbjct -AESSGMDVLLThpsftsesqpkLLHQVVEQLQKVH-----FITDLSK-----g 219  
 DSSP -LLEELLEEEEEE1111111111HHHHHHHHHHLL-----LEEEEEE-----1

DSSP LLEEEEEEEELLEEEEEEEEEEELLLLL11leeelhhhh11111leeel1hh  
 Query VKPRRFTAKLSYRGRAFATVPIEVSSVEAGNAdqfdt1tsdalglvgpaavavpcxtiP 182  
 ident | |  
 Sbjct ETKFMGVCQLPSDEKEYPHRRIDIRLIPKDQY-----yC 253  
 DSSP LLEEEEEELLLLLLLLLEEEEEEEELHHHH-----hH

DSSP HHHhhhhhh1111111111HHHH-----hhhhhhhh11hhHH  
 Query WQIaqlhavtavleepkandrahdLV-----dlqllegl11daDL 223  
 ident |  
 Sbjct GVL-----yftgSDIFNknmrahalekgftineytirplgvtgvagePL 297  
 DSSP HHH-----h111LHHHHHHHHHHHH1lee111lee111111111L

DSSP HHHhHHHHHHHHhh1111LLLL11111hhhhhhhh1111111111hhhhhhhhhhhh  
 Query XPtrSACIAifearaqhpWPPRVatlphwpliYagalegldhlelartvdaaaqavqrfv 283  
 ident  
 Sbjct PV--DSEKD-----ifdYIQWK----- 312  
 DSSP LL--LLHHH-----hhHLLL-----





```

ident
Sbjct aekideflatgklrklekirqddtssinfltrvsgigpsaarkfvdegiktledlrkne 120
DSSP hhhhhhhhhhh111hhhhhhhhhhhhhhhhhhhh111111hhhhhhhhhh1111hhhhhhhh

DSSP hhhhhhhhhhh111hhhhhhHHHHHHHHHHHHHH-LLLL111LLLEEEHHHHHHHHhh11
Query slrdrltqvaerqgvfgrlqRHVAXIVVAQFAA-TLTDdtGAPLLLKGGSSLELrrgi 71
ident | |
Sbjct dklnhhqrigrkyfgdfekriPREEMLMQDIVLnEVKKvdSEYIATVCGSFRRGA---- 176
DSSP h11hhhhhhhh1hhhh11eEHHHHHHHHHHHHHHHHHH11LLLEEEELHHHHLL----

DSSP 1111LLLEEEEEEEL-----1LHHHHHHHHHHHHhh1111eeEEELLLEE1111
Query pdsrTSKDFATVAR-----rDIELIHEQLADAGetgwegftAIFTAPEEiaap 119
ident | | | |
Sbjct ---eSSGDMDVLLThpsftseskqpkLLHQVVEQLQKVH-----FITDTLSK---- 221
DSSP ---1EELLEEEEEE111111111111HHHHHHHHHHHLL-----LEEEEEE-----

DSSP 111LLLEEEEEEEL--LEEEEEEEL-LLLL1111eeee1hhhh1111lee
Query gxpVKPRRFTAKLSYR--GRAFATVPIEVSSV-EAGNadqfdtlttsdalglvgvpaav 176
ident | |
Sbjct --gETKFMGVCQLPSKndEKEYPHRRIDIRLlpKDQY----- 256
DSSP --1LEEEEEE111111111111LLLEEEEEEEL1HHHH-----

DSSP eellhHHHHhhhhhhhh111111111111HHHH-----hhhhhhh
Query pcxtiPWQIaqklhavtavleekandraHDLV-----dlqllegl 217
ident |
Sbjct ----yCGVL-----yftgSDIFnknmrahalekgftineytirplgvtg 296
DSSP ----hHHHH-----hhh1LHHHHhhhhhhhhhh1lee1111ee1111

DSSP 11hHHHHhhHHHHhhhhhh111111111111hhhhhhhh1111111111hhhhhh
Query 1ldADLXPTrSACIaifearaqhPWPPRVatlpwpliyagalegldhlelartvdaaaq 277
ident |
Sbjct vagEPLPV--DSEK-----difdYIQWKY----- 318
DSSP 11111111--LLHH-----hhhh111111-----

DSSP hhhhhhhhhhh1111
Query avqrfvaridratkr 292
ident
Sbjct -----repkdrse 326
DSSP -----11hhhh11

```

No 106: Query=mol1A Sbjct=5bomA Z-score=7.0

[back to top](#)

```

DSSP -----
Query ----- 0
ident
Sbjct lnggitdmltelanfeknvsaiahkynayrkaasviakypkiksgaeakklpgvgtkia 60
DSSP 11hhhhhhhhhhhhhhhh1111hhhhhhhhhhhhhhhh111111hhhhhh1111hhhh

DSSP -----1111111111hhhh
Query -----aapyspntlrs 13
ident
Sbjct ekideflatgklrklekirqddtssinfltrvsgigpsaarkfvdegiktledlrkned 120
DSSP hhhhhhhhh111hhhhhhhh11hhhhhhhhhh111111hhhhhhhhhh1111hhhhhhhh

DSSP hhhhhhhhhhh111hhhhhhHHHHHHHHHHHHHH-LLLL111LLLEEEHHHHHHHHhh11
Query lrdrltqvaerqgvfgrlqRHVAXIVVAQFAA-TLTDdtGAPLLLKGGSSLELrrgip 72
ident | |
Sbjct klnhhqrigrkyfgdfekriPREEMLMQDIVLnEVKKvdSEYIATVCGSFRRGA---- 175
DSSP h11hhhhhhhh1hhhh11eEHHHHHHHHHHHHHHHHHH11LLLEEEELHHHHLL----

DSSP 111LLLEEEEEEEL-----1LHHHHHHHHHHHHhh1111eeEEELLLEE111111L
Query dsrTSKDFATVAR-----rDIELIHEQLADAGetgwegftAIFTAPEEiaapgxpV 123
ident | | | |
Sbjct --eSSGDMDVLLThpsftsespkLLHQVVEQLQKVH-----FITDTLSK-----gE 219
DSSP --1EELLEEEEEE111111111111HHHHHHHHHHHLL-----LEEEEEE-----1L

```







```

query v
ident
Sbjct tlnggitdmltelanfeknvsqaihkynayrkaasviakypkiksgaeakklpgvgtki 60
DSSP 111hhhhhhhhhhhhhhhh111hhhhhhhhhhhhhhhh111111hhhhhh11111hhhh

DSSP -----111111111hh
Query -----aapyspsptnlr 12
ident
Sbjct aekideflatgklrklekirqddtsssinftrvsgigpsaarkfvdegiktledlrkne 120
DSSP hhhhhhhhhhh111hhhhhhhhhh1hhhhhhhhhh111111hhhhhhhhhh11111hhhhhhhh

DSSP hhhhhhhhhhh1111hhhhhhHHHHHHHHHHHHHHH-LLLL111LLLEEEHHHHHHHHhh11
Query slrdrltqvaerqgvfgrlqRHVAXIVVAQFAA-TLTDdtGAPLLLVKGGSSLELrrgi 71
ident | |
Sbjct dklnhhqriglkyfgdfekriPREEMLQMQDIVLnEVKKvdSEYIATVCGSFRRGA---- 176
DSSP hhl1hhhhhhhh1hhhh111eEHHHHHHHHHHHHHHHHHH1LLEEEEEEHHHLLL----

DSSP 1111LLLEEEEEEEL-----1LHHHHHHHHHHHHhh1111eeEEELLEEL111
Query pdsrTSKDFATVAR-----rDIELIHEQLADAGetgwegftAIFTAPEEJaap 119
ident | | | |
Sbjct ---eSSGDMDVLLThpsftsestkqpkLLHQVVEQLQKVH-----FITDTLSKG--- 222
DSSP ---1EELLEEEEEE1111111111111111HHHHHHHHHHHLL-----LEEEEEEEL---

DSSP 111LLLEEEEEEEL--LEEEEEEEL-LLLL1111eeee1hhhh11111lee
Query gxpVKPRRFTAKLSYR--GRAFATVPIEVSSV-EAGNadqfdtlttsdalglvgvpaavav 176
ident | |
Sbjct ---ETKFMGVCQLPSKndEKEYPHRRIDIRLlpKDQY----- 256
DSSP ---LLEEEEEE1111111111111111HHHHHHHHHHH-----

DSSP ee11hHHHHhhhhhhhh1111111111111111HHHHHHHH-----hhh
Query pcxtiPWQIaqklhavtavleepkandraHDLVDLQL-----legl 217
ident |
Sbjct ----yCGVL-----yftgSDIFNKNMrahalekgftineytirplgvtg 296
DSSP ----hHHHH-----hhh1LHHHHHHhhhhhh1lee1111lee11111

DSSP 11hHHHHhhHHHHhhhhhh1111LLLL11111hhhhhhhh1111111111hhhhhh
Query 1ldADLXptRSACIaifearaqhpWPPRVatlphwpliyagalegl dhlelartvdaaaq 277
ident |
Sbjct vagEPLP--VDSEK-----difDYIQW----- 316
DSSP 111LLLL--LLLHH-----hhhHLLL-----

DSSP hhhhhhhhhhh1111
Query avqravaridratkr 292
ident
Sbjct ----kyrepkdrse 326
DSSP ----1111hh111

```

No 110: Query=mol1A Sbjct=4docA Z-score=7.0

[back to top](#)

```

DSSP -----
Query ----- 0
ident
Sbjct tlnggitdmltelanfeknvsqaihkynayrkaasviakypkiksgaeakklpgvgtki 60
DSSP 111hhhhhhhhhhhhhhhh111hhhhhhhhhhhhhhhh111111hhhhhh11111hhhh

DSSP -----111111111hh
Query -----aapyspsptnlr 12
ident
Sbjct aekideflatgklrklekirqddtsssinftrvsgigpsaarkfvdegiktledlrkne 120
DSSP hhhhhhhhhhh111hhhhhhhhhh1hhhhhhhhhh111111hhhhhhhhhh11111hhhhhhhh

DSSP hhhhhhhhhhh1111hhhhhhHHHHHHHHHHHHHHH-LLLL111LLLEEEHHHHHHHHhh11
Query slrdrltqvaerqgvfgrlqRHVAXIVVAQFAA-TLTDdtGAPLLLVKGGSSLELrrgi 71
ident | |
Sbjct dklnhhqriglkyfgdfekriPREEMLQMQDIVLnEVKKvdSEYIATVCGSFRRGA---- 176
DSSP hhl1hhhhhhhh1hhhh111eEHHHHHHHHHHHHHHHHHH1LLEEEELHHHLLL----

```



```

ident           |
Sbjct  ---yCGVL-----yftgSDIFNKNMrahalekgftineytirplgvtg 296
DSSP  ---hHHHH-----hhlLHHHHHHHHHHhhhhllleelllleel11111

```

```

DSSP  11hHHHHhhHHHHhhhhhh1111LLLLL1111hhhhhhhh111111111hhhhhh
Query  1ldADLXptRSACIaifearaqhpWPPRVatlphwpliyagalegldhlelartvdaaaq 277
ident  |
Sbjct  vagEPLP--VDSEK-----difDYIQW-----316
DSSP  111LLL--LLLLH-----hhhHHHLL-----

```

```

DSSP  hhhhhhhhh1111
Query  avqrfvaridratkr 292
ident  |
Sbjct  ----kyrepkdrse 326
DSSP  ----1111hh111

```

No 112: Query=mollA Sbjct=4klpA Z-score=7.0

[back to top](#)

```

DSSP  -----
Query  -----0
ident  |
Sbjct  tlnggitdmltelanfekonvsqaihkynayrkaasviakypkiksgaeakklpgvgtki 60
DSSP  111hhhhhhhhhhhhhhhh1111hhhhhhhhhhhhhh111111hhhh111111hh

```

```

DSSP  -----11111111hh
Query  -----aapyspptnlr 12
ident  |
Sbjct  aekideflatgklrklekirqddtssinfltrvsgigpsaarkfvdegiktledlrkne 120
DSSP  hhhhhhhhh111hhhhhhhh1hhhhhhhh1111111hhhhhhhh1111hhhhhh1h

```

```

DSSP  hhhhhhhhh1111hhhhHHHHHHHHHHH-LLLL11LLLLEEEHHHHHHHH11
Query  slrdrltqvaerqgvfgrlqRHVAXIVVAQFAA-TLTDdtGAPLLLKGGSSLELrrgi 71
ident  | |
Sbjct  dklnhhqriqkyfgdfekriPREEMLQMQDIVLnEVKKvdSEYIATVCGSFRRGA---- 176
DSSP  hhl1hhhhhh11hhhhllleEHHHHHHHHHHHHHHHHHH1111111LEEEEEEHHHLLL----

```

```

DSSP  1111LLLLEEEEEEL-----1LHHHHHHHHHHHHhh111leEEELLEE111
Query  pdsrTSKFATVAR-----rDIELIHEQLADAGetgwegftAIFTAPEEiaap 119
ident  | | |
Sbjct  ---eSSGDMDVLLThpsftsestkqpkLLHQVVEQLQKVH-----FITDtlskg--- 222
DSSP  ---1EELLEEEL111111111111HHHHHHHHHHHLL-----LEEEEEEL---

```

```

DSSP  1111LEEEEEEELLEEEEEEEEL-LLLL111leeeelhhhh1111leeee
Query  gxpVKPRRFTAKLSYGRGFATVP1EVSSV-EAGNadqfdtltsdalglvgvpaavavpc 178
ident  | |
Sbjct  ---ETKFMGVCQLPSKEKEYPHRRIDIRL1pKDQY-----254
DSSP  ---LLEEEELLLLLLLLLLEEEEEEEL1HHHH-----

```

```

DSSP  11hHHHHhhhhhh1111111111HHHHHHH-----hhhh11
Query  xtiPWQIaqlhavtavlepkandraHDLVDLQ-----1leg111 219
ident  |
Sbjct  ---yCGVL-----yftgSDIFNKNMrahalekgftineytirplgvtgva 296
DSSP  --hHHHH-----hhlLHHHHHHHHHHhh11leel11leel11111

```

```

DSSP  hHHHHhhHHHHhhhhhh1111LLLLL1111hhhhhhhh111111111hhhhhhhh
Query  dADLXptRSACIaifearaqhpWPPRVatlphwpliyagalegldhlelartvdaaaqav 279
ident  |
Sbjct  gEPLP--VDSEK-----difDYIQW-----314
DSSP  1LLL--LLLLH-----hhhHHHLL-----

```

```

DSSP  hhhhhhhhh1111
Query  qrfvaridratkr 292
ident  |
Sbjct  ---kyrepkdrse 324
DSSP  ---1111hh111

```



```

DSSr  nnnnnnnnnnnnnnnnnnnnnllllleeeellllnnll-----leeeeeeeel11111111
DSSP  ---1LHHHHHHHHHHHHhh111leeEEELLEEL111111LLEEEEEEEEL--LEEE
Query  ---rDIELIHEQLADAGetgwegftAIFTAPEElaapgxpvKPRRFTAKLSYR--GRAFA 140
ident  ||| |
Sbjct  kqpkLLHRVVEQLQKVR-----FITDTLSKG-----ETKFMGVCQLPSEndENEYP 159
DSSP  1hhHHHHHHHHHHLL-----LEEEEEEEL-----LLEEEEEEEELLLL11LLLLL

DSSP  EEEEEEEEL-LLLL111leeeelhhhh1111leeeel1hHHHHhhhhhhhh11111
Query  TVPIEVSSV-EAGNadqfdt1tsdalglvgvpaavavpcxtiPWQIaqlhavlaveep 199
ident  |
Sbjct  HRRIDIRLIpKDQY-----yCGVL----- 178
DSSP  EEEEEEEEL1HHHH-----hHHHH-----

DSSP  11111hhhhHHHHHH-----hh11hhhhhhhhHHHHhhhhhh
Query  kandrahdlvDLQLE-----gllldadlxptrSACIaifear 237
ident  |
Sbjct  -----yftgSDIFNKnmrahalekgftineytirplgvtgvageplpvdSEQD----- 226
DSSP  -----hhh1LHHHHHHhhhhhh1leeeelleee11111111111LHHH-----

DSSP  1111LLL11111hhhhhhhh1111111111hhhhhhhhhhhhhh111
Query  aqhpWPPRVat1phwpliYagaleglhlehlar tvdaaaqavqrvaridratkr 292
ident  |
Sbjct  -ifdYIQWR-----yrepkdrse 243
DSSP  -hhhHLLL-----11hhhh11

```

No 115: Query=mol1A Sbjct=2p66A Z-score=7.0

[back to top](#)

```

DSSP  -----
Query  ----- 0
ident  -----
Sbjct  pqetlnggitdmltelanfeknvsqaihkynayrkaasviakypkiksgaeaklpgvg 60
DSSP  1hhhhhhhhhhhhhhhhhh111hhhhhhhhhhhhhh111111hhhhhh11111

DSSP  -----11111111
Query  -----aapysppt 9
ident  -----
Sbjct  tkiaekideflatgklrklekirqddtssinfltrvsgigpsaarkfvdegiktledlr 120
DSSP  hhhhhhhhhhhhh111hhhhhhhh111hhhhhh111111hhhhhhhh1111hhhh

DSSP  1hhhhhhhhhhhh111hhhhHHHHHHHHHHHH-LLLL11LLEEEHHHHHHHH
Query  nlrsldr1tqvaerqgvfgrlqRHVAXIVVAQFAA-TLTDdtGAPLLLVKGGSSLELr 68
ident  | |
Sbjct  knedklnhqrigrkyfgdfekriPREEMLMQMDIVLnEVKKvdSEYIATVCGSFRRGA- 179
DSSP  h1hh11hhhhhh11hhhh1leEHHHHHHHHHHHHHHHHHH1LLEEEELLLLLL-

DSSP  h11111LLEEEEL-----1LHHHHHHHHHHHHhh111leeEEELLEEL111
Query  rgipdsrTSKDFATVAR-----rDIELIHEQLADAGetgwegftAIFTAPEElaap 119
ident  ||| |
Sbjct  -----eSSGMDVLLThpsftsespkLLHQVVEQLQKVH-----FITDTLSKG--- 222
DSSP  -----1EELLEEEEEE11111111hhHHHHHHHHHLL-----LEEEEEEEL---

DSSP  111LLEEEEEEEL--LEEEEEEEL-LLLL111leeeelhhhh1111lee
Query  gxpVKKPRRFTAKLSYR--GRAFATVPIEVSSV-EAGNadqfdt1tsdalglvgvpaavav 176
ident  |
Sbjct  ---ETKFMGVCQLPSKndEKEYPHRRIDIRLIpKDQY----- 256
DSSP  ---LLEEEEEEELLLL11LLEEEEEEEL1LLLH-----

DSSP  eellHHHHHHhhhhhh1111111111hhhhHHHHHH-----
Query  pcxtiPWQIaqlhavlaveepkandrahdlvDLQLE----- 215
ident  -----
Sbjct  ---yCGVL-----yftgSDIFNKnmrahalekgftineytirpl 292
DSSP  ---hHHHH-----h111LHHHHHHhhhhhh11leee111leee1

DSSP  -hh11hhhhhhhhHHHHhhhh11L11L1111hhhhhhhh1111111111hh

```

```
query  gllldadlxptRSACIAifearaqhWPPRVatlphwpliyagaleglhdhlar tvda 274
ident  |
Sbjct  gvtgvageplpvdSEKD-----ifDYIQWK----- 317
DSSP  1111111111111111LHHH-----hhHLLLL-----
```

```
DSSP  hhhhhhhhhhhhh1111
Query  aaqavqrfvaridratkr 292
ident
Sbjct  -----yrepkdrse 326
DSSP  -----111hh111
```

No 116: Query=mol1A Sbjct=9icsA Z-score=7.0

[back to top](#)

```
DSSP  -----
Query  ----- 0
ident
Sbjct  etlnggitdmltelanfeknvsqaihkynayrkaasviakypkiksgaeakklpgvgtk 60
DSSP  1111hhhhhhhhhhhhhhhh1111hhhhhhhhhhhhhhhh111111hhhhhh11111hh
```

```
DSSP  -----1111111111h
Query  -----aapyspsptnl 11
ident
Sbjct  iaekideflatgklrklekirqddtsssinfltrvsgigpsaarkfvdegiktledlrkn 120
DSSP  hhhhhhhhhhh1111hhhhhhhhhhhhhhhh111111hhhhhhhh111111hhhhhh1
```

```
DSSP  hhhhhhhhhhh1111hhhhhhHHHHHHHHHHHHH-LLLL11LLLEEEHHHHHHHHhh1
Query  rslrdrltqvaerqgvfgrlqRHVAXIVVAQFAA-TLTDdtGAPLLLKVGGSSELRrg 70
ident  |
Sbjct  edklnhhqriglkyfgdfekriPREEMLQMQDIVLnEVKkvdSEYIATVCGSFRGA--- 177
DSSP  hhh11hhhhhhhh1hhhhhh1leEHHHHHHHHHHHHHHHHHH1LLEEEELLLLLLLL---
```

```
DSSP  11111LLLEEEEL-----1LHHHHHHHHHHHHhh1111eeEEELLEEL11
Query  ipdsrTSKDFATVAR-----rDIELIHEQLADAGetgwegftAIFTAPEEIaa 118
ident  | |
Sbjct  ---eSSGMDVLLThpsftsestqpkLLHQVVEQLQKVH-----FITDTLSKG-- 223
DSSP  ---1EELLEEEEEEe1111111111hhHHHHHHHHHHLL-----LEEEEEEEL--
```

```
DSSP  11111LLLEEEEEEEL--EEEEEEEEEEEL-LLLL1111eeeeelhhhh11111lee
Query  pgxpVKPRRFTAKLSYRG--RAFATVPIEVSSV-EAGNadqfdtltsdalglvgvpaava 175
ident  |
Sbjct  ---ETKFMGVCQLPSKNdeKEYPHRRIDIRLIpKDQY----- 257
DSSP  ---LLEEEEEEELLLLL1111111111LLEEEEEEeHHHH-----
```

```
DSSP  ee11hHHHHhhhhhhhh111111111111hhhhHHHHHH-----
Query  vpcxtiPWQIaqklhavtavleekandrahdlvDLQLE----- 215
ident
Sbjct  ---yCGVL-----yftgSDIFNKnurahalekgftineytirp 292
DSSP  ---hHHHH-----hh11LHHHHhhhhhhhh111111111111
```

```
DSSP  -hh11hhhhhhhhHHHHHHhhhhhh111111111111hhhhhhhhhh1111111111hhh
Query  -gllldadlxptRSACIAifearaqhWPPRVatlphwpliyagaleglhdhlar tvda 274
ident
Sbjct  lgvtgvageplpVSEKD-----ifDYIQWK----- 318
DSSP  1111111111111111LHHH-----hhHLLLL-----
```

```
DSSP  hhhhhhhhhhhhh1111
Query  aaqavqrfvaridratkr 292
ident
Sbjct  -----yrepkdrse 327
DSSP  -----111hh111
```

No 117: Query=mol1A Sbjct=3gdxA Z-score=7.0



[back to top](#)

DSSP -----  
 Query ----- 0  
 ident  
 Sbjct tlnggitdmltelanfeknvsqaihkyayrkaasviakyphkiksgaeakklpgvgtki 60  
 DSSP 111hhhhhhhhhhhhhhhh111hhhhhhhhhhhhhh11111111hhhh11111hh

DSSP -----111111111hh  
 Query -----aapyspntl 12  
 ident  
 Sbjct aekideflatgklrklekirddtsssinfltrvsgigpsaarkfvdegiktledlrkne 120  
 DSSP hhhhhhhhh111hhhhhhhh1hhhhhhhh1111111hhhhhh11111hhhhhh1h

DSSP hhhhhhhhhhh1111hHHHHHHHHHHHHHHHHL-LLLL1LLLLEEEHHHHHHhh11  
 Query slrdrltqvaerqgvvfgRLQRHVAXIVVAQFAAT-LTDDtGAPLLLVKGGSSLELrgi 71  
 ident  
 Sbjct dklnhhqriglkylfgdfEKRIPREEMLQMQDIVLNeVKKvDSEYIATVCGSFRRGA---- 176  
 DSSP hhh1hhhhhhhh1hhhhHLEEEHHHHHHHHHHHHHHH11LLLEEEELHHHLLL----

DSSP 1111LLLLEEEEL-----1LHHHHHHHHHHHHhh111leEEELLEEL111  
 Query pdsrTSKDFATVAR-----rDIELIHEQLADAGetgwegftAIFTAPEEaap 119  
 ident  
 Sbjct ---eSSGDMVLLThpsftsestkqpkLLHQVVEQLQKVH-----FITDTLSKG--- 222  
 DSSP ---LEELLEEEEEEL11leel111HHHHHHHHHHLL-----LEEEEEEL---

DSSP 111LLLLEEEEEEEL--LEEEEEEEEEEEL-LLLL111leeeelhhhh1111leee  
 Query gxpVKPRRFTAKLSYR--GRAFATVPIEVSSV-EAGNadqfdtlttsdalglvgvpaav 176  
 ident  
 Sbjct ---ETKFMGVCQLPSKndEKEYPHRRIDIRLlpKDQY----- 256  
 DSSP ---LEEEEEELLLL11LLLLEEEEEEEL1HHHH-----

DSSP eellhHHHHhhhhhhhh111111111111HHHHHHH-----hhhhh  
 Query pcxtiPWQIaqklhavtavleekandraHDLVDLQ-----llegl 217  
 ident  
 Sbjct ----yCGVL-----yftgSDIFNKNmrahalekgftineytirplgvtg 296  
 DSSP ----hHHHH-----hhhLHHHHHHHHhhhh1leee111ee11111

DSSP 11hHHHHhhHHHHhhhh11111111111111hhhhhhhh1111111111hhhhh  
 Query 1ldADLXptRSACIaifearaqhpWPPRVAtlphwpliyagalegldhlelartvdaaaq 277  
 ident  
 Sbjct vagEPLP--VDSEK-----difDYIQWK----- 317  
 DSSP 111LLL--LLLH-----hhHLLL-----

DSSP hhhhhhhhh1111  
 Query avqravaridratkr 292  
 ident  
 Sbjct -----yrepkdrse 326  
 DSSP -----11hhhh111

No 118: Query=mol1A Sbjct=3c21A Z-score=7.0

[back to top](#)

DSSP -----  
 Query ----- 0  
 ident  
 Sbjct tlnggitdmltelanfeknvsqaihkyayrkaasviakyphkiksgaeakklpgvgtki 60  
 DSSP 111hhhhhhhhhhhhhhhh111hhhhhhhhhhhhhh11111111hhhh11111hh

DSSP -----111111111hh  
 Query -----aapyspntl 12  
 ident  
 Sbjct aekideflatgklrklekirddtsssinfltrvsgigpsaarkfvdegiktledlrkne 120  
 DSSP hhhhhhhhh1111hhhhhhhh1hhhhhhhh1111111hhhhhhhh11111hhhhhh1h

DSSP hhhhhhhhhhh1111hhhhHHHHHHHHHHHHL-LLLL1LLLLEEEHHHHHHhh11  
 Query slrdrltqvaerqgvvfgrlqRHXIVVAQFAA-TLTDdtGAPLLLVKGGSSLELrgi 71

```

ident
Sbjct dklnhhqriglkyfgdfekriPREEMLQMQDIVLnEVKkvdSEYIATVCGSFRRGA---- 176
DSSP hhl1hhhhhhhhhh1hhhh11eEHHHHHHHHHHHHHHHLL11LLLLLEEEHHHLLL----

DSSP 1111LLLLLEEEEL-----1LHHHHHHHHHHHHhh1111eeEELLEEL111
Query pdsrTSKDFATVAR-----rDIELIHEQLADAGetgwegftAIFTAPEElaap 119
ident
Sbjct ---eSSGMDVLLThpsftsestkpqkLLHQVVEQLQKVH-----FITDTLSKG--- 222
DSSP ---1EELLEEEEL111111111111HHHHHHHHHHHLL-----LEEEEEEEL---

DSSP 1111LLLLLEEEEEEEL--LEEEEEEEL-LLLL1111eeeee1hhhh11111eee
Query gxpVKPRRFTAKLSYR--GRAFATVPIEVSSV-EAGNadqfdtlttsdalglvgvpaavav 176
ident
Sbjct ---ETKFMGVCQLPSKndEKEYPHRRIDIRLIpKDQY----- 256
DSSP ---LEEEEEEELLLL11LLLLLEEEEEEEL1HHHH-----

DSSP eellhHHHHhhhhhh111111111111hhhhHHHHHHHLL-----1HHHH-----
Query pcxtiPWQIaqklhavtavleepkandrahd1vDLQLEGLL-----1DADL----- 223
ident
Sbjct ----yCGVL-----yftgSDIFNKNMRahalekgFTINeytirpl 292
DSSP ----hHHHH-----h111LHHHHHHHHhhhh11EEEL111eeel

DSSP -----hhHHHHHHhhhh1111LLLLL11111hhhhhhhh1111111111hhhh
Query -----xptRSACIaifearaqhpWPPRVat1phwpliyagalegldhlelartvdaa 275
ident
Sbjct gvtgvageplpVDSEK-----difDYIQW----- 316
DSSP 111111111111LHLLH-----hhHHLLL-----

DSSP hhhhhhhhhhh1111
Query aqavqrfvaridratkr 292
ident
Sbjct -----kyrepkdrse 326
DSSP -----1111hhhh111

```

No 119: Query=mol1A Sbjct=1rplA Z-score=7.0

[back to top](#)

```

DSSP -----1111111111hhhhhhhhhhhh1111hhhhHHHH
Query -----aapyspntnrslrdrltqvaerqgvfgrlqRHVA 37
ident
Sbjct ssinfltrvtgigpsaarklvdegiktledlrknedklnhhqriglkyfedfekriPREE 60
DSSP 1hhhhhh11111hhhhhhhh1111hhhh11hh11hhhhhhhh111hh11eEHHH

DSSP HHHHHHHH-LLLL11LLLLLEEEHHHHHHHHhh111111LLLLLEEEEL-----
Query XIVVAQFAA-TLTDdtGAPLLLVKGGSSLELrrgipdsrTSKDFATVAR----- 85
ident
Sbjct MLQMQDIVLnEVKk1dPEYIATVCGSFRRGA-----eSSGMDVLLThpnftsesskq 113
DSSP HHHHHHHHHhhHHHh1LLEEEELLLLLLL-----1EELLEEEEL1111111111

DSSP -1LHHHHHHHHHHhh1111eeEELLEEL111111LLEEEEEEEL--LEEEEEE
Query -rDIELIHEQLADAGetgwegftAIFTAPEElaapxpVKPRRFTAKLSYR--GRAFATV 142
ident
Sbjct pkLLHRVVEQLQKVR-----FITDTLSKG-----ETKFMGVCQLPSEndENEYPHR 159
DSSP hhHHHHHHHHHHHLL-----LEEEEEEEL-----LLEEEEEEELLLL11LLLLLE

DSSP EEEEEEEL-LLLL1111eeeee1hhhh111111eeeee1hHHHHhhhhhh11111111
Query PIEVSSV-EAGNadqfdtlttsdalglvgvpaavavpcxtiPWQIaqklhavtavleepka 201
ident
Sbjct RIDIRLIpKDQY-----yCGVL----- 176
DSSP EEEEEEEL1HHHH-----hHHHH-----

DSSP 1111hhhhHHHHH-----hh11hhhhhhhhHHHHhhhh11
Query ndrhd1vDLQLE-----gllldad1xptrSACIaifearaq 239
ident
Sbjct ----yftgSDIFNKNmrahaalekgftineytirplgvtgvageplpvdSEQD-----i 225
DSSP ----hh1LHHHHHHhhhhhh11lee1111ee111111111111LHLLH-----h

```

DSSP 11LLLLL11111hhhhhhhhhh1111111111hhhhhhhhhhhhhhhh1111  
 Query hpWPPRVatlphwpliyagalegldhlelartvdaaaqavqrfvaridratkr 292  
 ident  
 Sbjct fdYIQWR-----yrepkdrse 241  
 DSSP hhHLLLL-----111hhh111

No 120: Query=mol1A Sbjct=1bpdA Z-score=7.0

[back to top](#)

DSSP -----  
 Query ----- 0  
 ident  
 Sbjct etlnggitdmlvelanfeknvsqaihkynayrkaasviakyphkiksgaeakklpgvgtk 60  
 DSSP 1111hhhhhhhhhhhhhhhh111hhhhhhhhhhhhhhhh111111hhhhhh1111hh

DSSP -----111111111h  
 Query -----aapyspsptnl 11  
 ident  
 Sbjct iaekideflatgklrklekirqddtssinfltrvtgigpsaarklvdegiktledlrkn 120  
 DSSP hhhhhhhhh1111hhhhhhhh11hhhhhhhhhh11111hhhhhhhh11111hhhh111

DSSP hhhhhhhhhhh1111hHHHHHHHHHHHHHHHH-LLLL11LLLEEEHHHHHHHHh1  
 Query rslrdrltqvaerqgvvfGRLQRHVAXIVVAQFAA-TLTDdtGAPLLLKGGSSLELrrg 70  
 ident  
 Sbjct edklnhhqriglkyfedfEKRIPREEMLMQDIVLnEVKKIdPEYIATVCGSFRRGA--- 177  
 DSSP hhh11hhhhhhhhhhhhL1111HHHHHHHHHHHHhHHHHh1LLEEEELLLLLL---

DSSP 11111LLLEEEEL-----1LHHHHHHHHHHhh1111eeEEELLLEEL11  
 Query ipdsrTSKDFATVAR-----rDIELIHEQLADAGetgwegftAIFTAPEEIIaa 118  
 ident  
 Sbjct ---eSSGDMDVLLThpnftsesskqpkLLHRVVEQLQKVR-----FITDTLSKG-- 223  
 DSSP ---1LLEEEEEE1111111111hHHHHHHHHHHLL-----LEEEEEEEL---

DSSP 1111LLLEEEEEEELLeEEEEEEEEEL-LLLL1111eeeee1hhhh11111eeeee  
 Query pgxpVKPRRFATAKLSYRGrAFATVPIEVSSV-EAGNadqfdtltsdalglvgvpaavavp 177  
 ident  
 Sbjct ---ETKFMGVCQLPSEN-EYPHRRIDIRLIpKDQY----- 254  
 DSSP ---LLEEEEEEELLLL-LLEEEEEEEL11LLH-----

DSSP e11hHHHHhhhhhh11111111111hhhhHHHHHH-----  
 Query cxtiPWQIaqlhavlavlepkandradlvDLQLE----- 215  
 ident  
 Sbjct ---yCGVL-----yftgSDIFNKmrahalekgftineytirplg 291  
 DSSP ---hHHHH-----hhhlLHHHHhhhhhhhh1leeeelleee11

DSSP hhl1hhhhhhhhHHHHhhhh1111LLLLL11111hhhhhhhh111111111hhhh  
 Query gl1ldadlxptrSACIaifearaqhpWPPRVatlphwpliyagalegldhlelartvdaa 275  
 ident  
 Sbjct vtgvageplpvdSEQD-----ifdYIQWR----- 315  
 DSSP 111111111111LHHH-----hhhHLLLL-----

DSSP hhhhhhhhhhh1111  
 Query aqavqrfvaridratkr 292  
 ident  
 Sbjct -----yrepkdrse 324  
 DSSP -----111111111

No 121: Query=mol1A Sbjct=4rq7A Z-score=7.0

[back to top](#)

DSSP -----  
 Query ----- 0  
 ident  
 Sbjct tlnggitdmltelanfeknvsqaihkynayrkaasviakyphkiksgaeakklpgvgtki 60

```

DSSP -----111111111hh
Query -----aapyssptnlr 12
ident
Sbjct aekideflatgklrklekirqddtsssinfltrvsgigpsaarkfvdegiktledlrkne 120
DSSP hhhhhhhhhhh111hhhhhhhhhhhhhhhhhh111111hhhhhhhhhh1111hhhhhhhh

DSSP hhhhhhhhhhh111hhhhhhHHHHHHHHHHHHHHH-LLLL111LLEEEHHHHHHHHhh11
Query slrdrltqvaerqgvfgrlqRHVAXIVVAQFAA-TLTDdtGAPLLLVKGGSSLELrgi 71
ident | |
Sbjct dklnhhqriglkyfgdfekriPREEMLQMQDIVLnEVKKvdSEYIATVCGSFRRGA---- 176
DSSP hhl1hhhhhhhh1h11eEHHHHHHHHHHHHHHHHHHh1LLEEEELLLLLL-----

DSSP 1111LLEEEEL-----1LHHHHHHHHHHHHhh1111eeEELLEEL111
Query pdsrTSKDFATVAR-----rDIELIHEQLADAGetgwegftAIFTAPEEiaap 119
ident | |
Sbjct ---eSSGDMDVLLThpsfstsstkpkLLHQVVEQLQKVH-----FITDTLSK---- 221
DSSP ---1EELLEEEEL111111111111HHHHHHHHHHHLL-----LEEEEEE-----

DSSP 111LLEEEEEEEL--LEEEEEEEL-LLLL1111eeehhh1111lee
Query gxpVKPRRFTAKLSYR--GRAFATVPIEVSSV-EAGNadqfdtlttsdalglvgvpaavav 176
ident | |
Sbjct --gETKFMGVCQLPSKndEKEYPHRRIDIRLIpKDQY----- 256
DSSP --LLEEEEEEELLLL111LLEEEEEEEL1HHHH-----

DSSP eellHHHHhhhhhhhh1111111111HHHH-----hhhhhhh
Query pcxtiPWQIaqkIhavtavleepkandraHDLV-----dlqllegl 217
ident |
Sbjct ----yCGVL-----yftgSDIFnknmrahalekgftineytirplgvtg 296
DSSP ----hHHHH-----hhlLHHHHhhhhhhhhhh111ee111ee1111

DSSP 11hhHHHHhhHHHHhhhhhh111L111111hhhhhhhh1111111111hhhhhh
Query lldaDLXPtRACIaifearaqhPWPPRvatlphwpliyagalegldhlelartvdaaaq 277
ident |
Sbjct vagePLPV--DSEK----difdYIQWK----- 317
DSSP 1111L111--LLHH----hhhhL111L-----

DSSP hhhhhhhhhhh1111
Query avqrfvaridratkr 292
ident
Sbjct -----yrepkdrs 325
DSSP -----111hhhh1

```

No 122: Query=mol1A Sbjct=4m9jA Z-score=7.0

[back to top](#)

```

DSSP -----
Query ----- 0
ident
Sbjct tlnggitdmltelanfeknvsqaihknayrkaasviakyphkiksgaeakklpgvgtki 60
DSSP 111hhhhhhhhhhhhhhhhhh111hhhhhhhhhhhhhhhh111111hhhh11111hh

DSSP -----111111111hh
Query -----aapyssptnlr 12
ident
Sbjct aekideflatgklrklekirqddtsssinfltrvsgigpsaarkfvdegiktledlrkne 120
DSSP hhhhhhhhhhh111hhhhhhhhhhhhhhhhhh111111hhhhhhhhhh1111hhhhhhhh

DSSP hhhhhhhhhhh111hhhhhhHHHHHHHHHHHHHHH-LLLL111LLEEEHHHHHHHHhh11
Query slrdrltqvaerqgvfgrlqRHVAXIVVAQFAA-TLTDdtGAPLLLVKGGSSLELrgi 71
ident | |
Sbjct dklnhhqriglkyfgdfekriPREEMLQMQDIVLnEVKKvdSEYIATVCGSFRRGA---- 176
DSSP hhl1hhhhhhhh1h11eEHHHHHHHHHHHHHHHHHHh1LLEEEELHHHHLL-----

DSSP 1111LLEEEEL-----1LHHHHHHHHHHHHhh1111eeEELLEEL111111LL

```



DSSP h11hHHHHHhhHHHhHHh111LLLLL11111hHHHhHHh11111111hHHh  
Query 11ldADLXPtrSACIAifearaqhPWPPRVatlphwpliyagalegl dhlelartvdaaa 276  
ident |  
Sbjct gvagEPLPV--DSEK-----difdYIQWKY----- 319  
DSSP 1111LLLLL--LLHH-----hHHHLLLLL-----

DSSP hHHHHHhHHh1111  
Query qavqrfvaridratkr 292  
ident  
Sbjct -----repkdrse 327  
DSSP -----11hHHh111

No 124: Query=mollA Sbjct=4ymnA Z-score=7.0

[back to top](#)

DSSP -----  
Query ----- 0  
ident  
Sbjct pqetlnggitdmltelanfeknvsqaihknayrkaasviakyphkiksgaeakklpgvg 60  
DSSP 11hHHHHHhHHhHHHhHHh1111hHHhHHhHHhHHh11111111hHHHh11111

DSSP -----111111111  
Query -----aapyssppt 9  
ident  
Sbjct tkiaekideflatgklrklekirqddtsssinfptrvsgigpsaarkfvddegiktledlr 120  
DSSP hHHHHHhHHh111hHHhHHh111hHHhHHh1111111hHHHhHHh1111hHHh

DSSP 1hHHHhHHhHHh111hHHhHHHhHHHhHHHhHHHhHHHhHHHhHHHhHHHhHHHh 68  
Query nlrslrdrltqvaerqgvfgrlqrHVAVIVVAFQFAA-TLTDdtGAPLLLVKGGSSLELr  
ident | |  
Sbjct knedklnhhqriglkyfgdfekriPREEMLQMqDIVLnEVKKvdSEYIATVCGSFRRA- 179  
DSSP 11hHHh11hHHhHHh11hHHh11leEHHHHHhHHHhHHHh11LLEEEELHHHLLH-

DSSP h11111LLLLLEEEEL-----1LHHHhHHhHHh1111eeEEELLEE111  
Query rgipdsRTSKDFATVAR-----rDIELIHEQLADAGetgwegftAIFTAPEEiaa 118  
ident | | | |  
Sbjct -----ESSGMDVLLThpsftsesqpkLLHQVVEQLQKVH-----FITDTLSK--- 222  
DSSP -----LEELLEE11111111hHHHhHHHhLL-----LEEEEEE---

DSSP 1111LLEEEEEEELL-----EEEEEEEEEEL-LLLL1111eHhHHh11111ee  
Query pgxpVKPRRFTAklSYRG--RAFATVPIEVSSV-EAGNadqfdtltsdalglvgvpaava 175  
ident | |  
Sbjct ---gETKFMGVCQLPSKNdeKEYPHRRIDIRLIpKDQY----- 257  
DSSP ---1LLEEEEEE11111111LLLLLEEEEEEEL1HhHH-----

DSSP ee11hHHHhHHhHHh1111111111HhHHH-----hHHHh  
Query vpcxtiPWQIaqklhavtavlepkandraHDLV-----dlqlleg 216  
ident |  
Sbjct ----yCGVL-----yftgSDIFnknmrahalekgtineytirplgv 296  
DSSP ----hHHH-----hHHHLLHhHHhHHh11hHHh11ee111111

DSSP h11hHHHhHHhHHHhHHh111LLLLL11111hHHHhHHh11111111hHHh  
Query 11ldaDLPTrSACIAifearaqhPWPPRVatlphwpliyagalegl dhlelartvdaaa 276  
ident |  
Sbjct gvagePLPV--DSEKD-----ifdYIQWK----- 318  
DSSP 11111LLLL--LLHH-----hh1LLLLL-----

DSSP hHHHHHhHHh1111  
Query qavqrfvaridratkr 292  
ident  
Sbjct -----yrepkdrse 327  
DSSP -----11hHHh111



DSSP hhhhhhhhhhh1111hHHHHHHHHHHHHHHHHH-LLLL11LLLLLEEEHHHHHHHHhh11  
Query slrdrltqvaerqgvvfGRLQRHVAXIVVAQFAA-TLTDdtGAPLLLKGGSSLELrrgi 71  
ident | |  
Sbjct dklnhhqriglkyfgdfEKRIPREEMLMQDIVLnEVKkvdSEYIATVCGSFRRGA---- 176  
DSSP hhl1hhhhhhhh1hhhhLLEEEHHHHHHHHHHHHHHHHHh1LLEEEELLLLLL----

DSSP 1111LLLLLEEEEL-----1LHHHHHHHHHHHHhh1111eeEELLEEL111  
Query pdsrTSKDFATVAR-----rDIELIHEQLADAGetgwegftAIFTAPEEiaap 119  
ident | | | |  
Sbjct ---eSSGDMVLLThpsftsestkpqkLLHQVVEQLQKVH-----FITDTLSKG--- 222  
DSSP ---1EELLEEEEEE111111111111HHHHHHHHHHHLL-----LEEEEEEEL---

DSSP 1111LEEEEEEEL--LEEEEEEEL-LLLL1111eeehhh1111lee  
Query gxpVKPRRFTAKLSYR--GRAFATVPIEVSSV-EAGNadqfdtlttsdalglvgvpaavav 176  
ident | | | |  
Sbjct ---ETKFMGVCQLPSKndEKEYPHRRIDIRLlpKDQY----- 256  
DSSP ---LEEEEEEELLLLL111111111111LEEEEEEEL1HHHH-----

DSSP eel1hHHHHhhhhhh111111111111HHHHHHH-----hhhhh  
Query pcxtiPWQIaqlhavlavleekandraHDLVDLQ-----llegl 217  
ident | |  
Sbjct ---yCGVL-----yftgSDIFNKNmrahalekgftineytirplgvtg 296  
DSSP ---hHHHH-----hhl1LHHHHHHHHHHhh11lee1111lee1111

DSSP 11hHHHHhhHHHHhhhhhh1111LLLLL1111hhhhhhhh1111111111hhhhhh  
Query lldADLXptRSACIaifearaqhpWPPRVAtpLhpwpliyagalegldhlelartvdaaaq 277  
ident | |  
Sbjct vagEPLP--VDSEK-----difDYIQWK----- 317  
DSSP 1111LLL--LLLH-----hHHHLLL-----

DSSP hhhhhhhhhhh1111  
Query avqrfvaridratkr 292  
ident |  
Sbjct -----yrepkdrse 326  
DSSP -----111hhhh111

No 127: Query=mol1A Sbjct=5j2fA Z-score=6.9

[back to top](#)

DSSP -----  
Query ----- 0  
ident -----  
Sbjct tlnggitdmltelanfeknvsqaihknayrkaasviakyphkiksgaeakklpgvgtki 60  
DSSP 111hhhhhhhhhhhhhh111hhhhhhhhhhhhhh111111hhhh11111hh

DSSP -----111111111hh  
Query -----aapyspntlr 12  
ident -----  
Sbjct aekideflatgklrklekirqddtssinfltrvsgigpsaarkfvdegiktledlrkne 120  
DSSP hhhhhhhhh111hhhhhhhhhhhhhh111111hhhhhhhh1111hhhh11h

DSSP hhhhhhhhhhh1111hhhhHHHHHHHHHHHH-LLLL11LLLLLEEEHHHHHHHHhh11  
Query slrdrltqvaerqgvvfgrlqRHVAXIVVAQFAA-TLTDdtGAPLLLKGGSSLELrrgi 71  
ident | |  
Sbjct dklnhhqriglkyfgdfekriPREEMLMQDIVLnEVKkvdSEYIATVCGSFRRGA---- 176  
DSSP hhl1hhhhhhhh11hhhh1eEHHHHHHHHHHHHHHHHHh1LLEEEELHHHHLLL----

DSSP 1111LLLLLEEEEL-----1LHHHHHHHHHHHHhh1111eeEELLEEL1111  
Query pdsrTSKDFATVAR-----rDIELIHEQLADAGetgwegftAIFTAPEEiaap 119  
ident | | | |  
Sbjct ---eSSGDMVLLThpsftsestkpqkLLHQVVEQLQKVH-----FITDTLSK--- 221  
DSSP ---1EELLEEEEEE111ee11ee1111HHHHHHHHHHHLL-----LEEEEEE---

DSSP 1111LEEEEEEEL--LEEEEEEEL-LLLL1111eeehhh1111lee  
Query gxpVKPRRFTAKLSYR--GRAFATVPIEVSSV-EAGNadqfdtlttsdalglvgvpaavav 176  
ident | |



Sbjct GLTRMVTQGLSRUGERLTHRRDTRLETPDQI 299  
DSSP --1LLEEEEEELLLL11LLLLLLEEEEEEL1HHHH-----

DSSP eel1hHHHHhhhhhhhh1111111111HHHH-----hhhhhhh  
Query pcxtiPWQIaqlhavtavleepkandraHDLV-----dlqllegl 217  
ident |  
Sbjct ----yCGVL-----yftgSDIFnknmrahalekgftineytirplgvtg 296  
DSSP ----hHHHH-----hhh1LHHHHhhhhhhhhhhleeel111lee11111

DSSP 11hHHHHhhHHHHhhhhhh111LLLLL11111hhhhhhhh1111111111hhhhh  
Query 11dADLXPTrSACIaifearaqhPWPPRVat1phwpliyagalegldhlelartvdaaaq 277  
ident |  
Sbjct vagEPLPV--DSEK----difdYIQWKY----- 318  
DSSP 111LLLLL--LLHH----hhhhLLLLLL-----

DSSP hhhhhhhhhhh1111  
Query avqrfvaridratkr 292  
ident  
Sbjct -----repkdrse 326  
DSSP -----11hhh111

No 128: Query=mol1A Sbjct=5j2cA Z-score=6.9

[back to top](#)

DSSP -----  
Query ----- 0  
ident  
Sbjct tlnggitdmltelanfeknvsqaihknayrkaasviakyphkiksgaeakklpgvgtki 60  
DSSP 111hhhhhhhhhhhhhh111hhhhhhhhhhhhhh111111hhhh111111hhh

DSSP -----111111111hh  
Query -----aapyspntlr 12  
ident  
Sbjct aekideflatgklrklekirqddtssinflttrvsgigpsaarkfvdegiktledlrkne 120  
DSSP hhhhhhhhh111hhhhhhhh1hhhhhhhh111111hhhhhhhh1111hhhhhh1h

DSSP hhhhhhhhhhh111hhhhHHHHHHHHHHHHH-LLLL11LLLLEEEEHHHHHHhh11  
Query slrdrltqvaerqgvfgrlqRHVAXIVVAQFAA-TLTDdtGAPLLLVKGGSSLELrgi 71  
ident | |  
Sbjct dklnhqrigrkyfgdfekriPREEMLQMqDIVLnEVKKvdSEYIATVCGSFRRGA---- 176  
DSSP hhl1hhhhhhhh1hhhh11eEHHHHHHHHHHHHHHHHHH1LLEEEELHHHHLL-----

DSSP 1111LLLLEEEEEL-----1LHHHHHHHHHHHHhh1111eeEELLEE1111  
Query pdsrTSKDFATVAR-----rDIELIHEQLADAGetgwegftAIFTAPEEiaap 119  
ident | | | |  
Sbjct ---eSSGDMdVLLThpsftsetkqpkLLHQVVEQLQKVH-----FITDTLSK---- 221  
DSSP ---1EELLEEELLLL1111111111111111HHHHHHHHHHLL-----LEEEEEEL-----

DSSP 111LLEEEEEEL--LEEEEEEEEEEL-LLLL1111eeee1hhhh11111lee  
Query gxpVKPRRFTAKLSYR--GRAFATVPIEVSSV-EAGNadqfdt1tsdalglvgvpaavav 176  
ident | |  
Sbjct --gETKFMGVCQLPSKndEKEYPHRRIDIRLlpKDQY----- 256  
DSSP --1LLEEEEEELLLL11LLLLLLEEEEEEL1HHHH-----

DSSP eel1hHHHHhhhhhhhh1111111111HHHH-----hhhhhhh  
Query pcxtiPWQIaqlhavtavleepkandraHDLV-----dlqllegl 217  
ident |  
Sbjct ----yCGVL-----yftgSDIFnknmrahalekgftineytirplgvtg 296  
DSSP ----hHHHH-----hhh1LHHHHhhhhhhhhhhleeel111lee11111

DSSP 11hHHHHhhHHHHhhhhhh111LLLLL11111hhhhhhhh1111111111hhhhh  
Query 11dADLXPTrSACIaifearaqhPWPPRVat1phwpliyagalegldhlelartvdaaaq 277  
ident |  
Sbjct vagEPLPV--DSEK----difdYIQWKY----- 318  
DSSP 111LLLLL--LLHH----hhhhLLLLLL-----



DSSP -----111111111  
Query -----aapysppt 9  
ident  
Sbjct tkiaekideflatgklrklekirqddtsssinfltrvsgigpsaarkfvdegiktledlr 120  
DSSP hhhhhhhhhhhhh111hhhhhhhh11hhhhhhhh111111hhhhhhhh1111hhhh

DSSP 1hhhhhhhhhhhh111hhhhHHHHHHHHHHHH-LLLL11LLLLEEEEHHHHHHhh  
Query nlrslrdrltqvaerqgvfgrlqRHVAXIVVAQFAA-TLTDdtGAPLLLKGGSSLElr 68  
ident | |  
Sbjct knedklnhhqriglkyfgdfekriPREEMLMQMDIVLnEVKKvdSEYIATVCGSFRRGA- 179  
DSSP 11hhh11hhhhhhhh11hhhh11leHHHHHHHHHHHHHHHHhh1LLEEEELHHHHLL-

DSSP h111111LLLLEEEEEL-----1LHHHHHHHHHHHHhh1111eeEEELLLEE11  
Query rgipdsrTSKDFATVAR-----rDIELIHEQLADAGetgwegftAIFTAPEEiaa 118  
ident | | | | |  
Sbjct -----eSSGMDVLLThpsftsesqpkLLHQVVEQLQKVH-----FITDTLSK--- 222  
DSSP -----1EELLEEEEE1111111111HHHHHHHHHHLL-----LEEEEEEE---

DSSP 1111LLLLEEEEEEEL--EEEEEEEEEEELLLL111eeee1hhhh11111ee  
Query pgxpVKPRRFTAKLSYRG--RAFATVPIEVSSVEAGNAdqfdtltsdalglvvpaaav 176  
ident | | | | |  
Sbjct ---gETKFMGVCQLPSKNdeKEYPHRRIDIRLIPKDQY----- 257  
DSSP ---1LLEEEEEELLLL111LLLLEEEEEEELHHHH-----

DSSP eel1hHHHHhhhhhh1111111111HHHH-----hhhhhhh  
Query pcxtiPWQIaqk1havtavleepkandraHDLV-----dlqllegl 217  
ident | | | | |  
Sbjct ----yCGVL-----yftgSDIFnknmrahalekgftineytirplgvtg 297  
DSSP ----hHHHH-----hh1LHHHHhhhhhh111ee111ee1111

DSSP 1hhHHHHhhHHHHhhhh111LLLL11111hhhhhhhh111111111hhhhhh  
Query l1daDLXPTrSACIAifearaqhWPPRvatlphwplyagalegldhlelartvdaaaq 277  
ident | | | | |  
Sbjct vagePLPV--DSEKD-----ifdYIQWK----- 318  
DSSP 1111LLLL--LLHH--hhHLLLL

DSSP hhhhhhhhh1111  
Query avqrfvaridratkr 292  
ident  
Sbjct -----yrepkdrse 327  
DSSP -----111hh111

No 131: Query=mol1A Sbjct=5db7A Z-score=6.9

[back to top](#)

DSSP -----  
Query ----- 0  
ident  
Sbjct ppetlnggitdmltelanfeknvqsaihkynayrkaasviakypkiksgaeakklpgvg 60  
DSSP 11hhhhhhhhhhhhhhhhhh111hhhhhhhhhhhhhh111111hhhhhh11111

DSSP -----111111111  
Query -----aapysppt 9  
ident  
Sbjct tkiaekideflatgklrklekirqddtsssinfltrvsgigpsaarkfvdegiktledlr 120  
DSSP hhhhhhhhhhhhh111hhhhhhhh11hhhhhhhh111111hhhhhhhh1111hhhh

DSSP 1hhhhhhhhhhhh111hhhhHHHHHHHHHHHH-LLLL11LLLLEEEEHHHHHHhh  
Query nlrslrdrltqvaerqgvfgrlqRHVAXIVVAQFAA-TLTDdtGAPLLLKGGSSLElr 68  
ident | |  
Sbjct knedklnhhqriglkyfgdfekriPREEMLMQMDIVLnEVKKvdSEYIATVCGSFRRG-- 178  
DSSP 11hhh11hhhhhhhh11hhhh11leHHHHHHHHHHHHHHHHhh1LLEEEELHHHHLL--

DSSP h1111LLLLLLLLEEEEEL-----1LHHHHHHHHHHHHhh1111eeEEELLLEE11  
Query rgipdsrTSKDFATVAR-----rDIELIHEQLADAGetgwegftAIFTAPEEiaa 118





[back to top](#)

```
DSSP -----
Query ----- 0
ident
Sbjct tlnggitdmltelanfeknvsqaihkynayrkaasviakyphkiksgaeakklpgvgtki 60
DSSP 111hhhhhhhhhhhhhhhh1111hhhhhhhhhhhhhh1111111hhhhh11111hhhh

DSSP -----111111111hh
Query -----aapyspntlr 12
ident
Sbjct aekideflatgklrklekirqddtssinfltrvsgigpsaarkfvdegiktledlrkne 120
DSSP hhhhhhhhh111hhhhhhhh1hhhhhhhhhh1111111hhhhhhhh11111hhhh11h

DSSP hhhhhhhhhhh1111hhhhHHHHHHHHHHHHH-LLLL111LLEEEHHHHHHHHhh11
Query slrdrltqvaerqgvfgrlqRHVAXIVVAQFAA-TLTDdtGAPLLLKGGSSLELrrgi 71
ident |
Sbjct dklnhhqriglkyfgdfekriPREEMLQMQDIVLnEVKKvdSEYIATVCGSFRGA---- 176
DSSP hh11hhhhhhhh1hhhh11eHHHHHHHHHHHHHHHHHH1LLEEEHHHHHLL----

DSSP 1111LLEEEEL-----1LHHHHHHHHHHHHhh1111eeEELLEEL11111
Query pdsrTSKDFATVAR-----rDIELIHEQLADAGetgwegftAIFTAPEEIIaapgx 122
ident | | | |
Sbjct ---eSSGDMDVLLThpsfttkqpkLLHQVVEQLQKVH-----FITDTLSKG----- 219
DSSP ---1EELLEEEEEE111111111HHHHHHHHHHHLL-----LEEEEEEEL-----

DSSP LLEEEEEEEEE1LEEEEEEEEEEL-LLLL1111eeeeelhhhh11111eeeeelh
Query VKPRRFTAKLSYrGRAFATVPIEVSSV-EAGNadqfdtltsdalglvgvpaavpcxti 181
ident | |
Sbjct ETKFMGVCQLPS-EKEYPHRRIDIRLIpKDQY-----y 251
DSSP LLEEEEEELLL-LLLLLEEEEEEEL1HHHH-----h

DSSP HHHhhhhhhhh1111111111HHHHHHH-----hhhh11hHHHHhhH
Query PWQIaqklhavtavleekandraHDLVDLQ-----1leg111dADLXPTrS 228
ident |
Sbjct CGVL-----yftgSDIFNKNmrahalekgftineytirpagEPLPV--D 293
DSSP HHHH-----hh11LHHHHHHhhhh11111ee1111ee111LLELL--L

DSSP HHHhhhhhh1111LLELL11111hhhhhhhh1111111111hhhhhhhhhhhhhh
Query ACIaifearaqhpWPPRVat1phwpliayagalegldhlelartvdaaaqavqrfvaridr 288
ident
Sbjct SEK-----difdYIQWK-----yrepk 310
DSSP LHH-----hhhhHLLL-----111hh

DSSP 1111
Query atkr 292
ident
Sbjct drse 314
DSSP h111
```

No 135: Query=mol1A Sbjct=3uq1A Z-score=6.9

[back to top](#)

```
DSSP -----
Query ----- 0
ident
Sbjct hnlhiteklevlakaysvqgdkwralgyakainalksfhkpvtsyqeacsipgigkrmae 60
DSSP 11111hhhhhhhhhhhhhh111hhhhhhhhhhhhhh1111111hhhhh111111hhhhh

DSSP -----111111111hhhhhh
Query -----aapyspntnrslrdr 17
ident
Sbjct kiieilesghlrkldhisesvpvlelfsniwgagtktaqmwyqqgfrsledirsqsaltt 120
DSSP hhhhhhh111hhhh11111hhhhhhhh111111hhhhhhhh11111hhhhhh111h

DSSP hhhhhhh1111hhhhHHHHHHHHHHHHHLL-LLLLLLEEEHHHHHHHHhh11111L
Query ltqvaerqgvfgrlQRHVAXIVVAQFAATL-TDDTGAPLLLKGGSSLELrrgipdsrT 76
```

```

ident
Sbjct qqai glkhysdflerMPREEATEIEQTVQKAAQAFNSGLLCVACGSYRRGK-----aT 173
DSSP  hhhhhhh111hhh11EEHHHHHHHHHHHHHHhLLLLLLEEEELHHHLLL-----1E

DSSP  LLEEEEEEL----1LHHHHHHHHHHHHh111leeEELLEEL11111LLEEEEEEE
Query  SKDFATVAR----rDIELIHQADAGetgwegftAIFTAPEElaapgxpvKPRRFTAKL 132
ident  |         |         |         |         |
Sbjct  CGDVDVLIThpdggIFSRLDSLREQE-----FLTDDLKVG-----ETKYLGVCR 219
DSSP  ELLEEEEEEL1111HHHHHHHHHHLLL-----LEEEEEEL-----LLEEEEEEL

DSSP  EE11EEEEEEEEEEEL-LLLL111leeeelh1111leeeelh1111HHHHhhhhh
Query  SYrgRAFATVPIEVSSV-EAGNadqfdt1tsdalglvgvpaavavpcxtiPWQIaqlha 191
ident  |
Sbjct  PG--PGRRHRRLDIIVVpYSEF-----aCALL----- 244
DSSP  LL--LLLLLEEEEEEEeHHHH-----hHHHH-----

DSSP  hh1111111111HHHHHH-----hhhh11hHHHHh
Query  vtavleepkandraHDLVDLQ-----1leg11dADLXpt 226
ident  |
Sbjct  -----yftgSAHFNRSmralaktgmslsehalstavrnthgavgpRVLP-- 292
DSSP  -----hhh1LHHHHHHhhhhhh11le111leee1le111leee11EEL--

DSSP  HHHHHhhhhhh1111LLLL1111hhhhhhhh1111111111hhhhhhhhhhhhhhhh
Query  RSACIaifearaqhpWPRVat1phwplyagaleglh1elartvdaaaqavqrvari 286
ident  |
Sbjct  TPTEK-----dvfRLLGL-----pyre 309
DSSP  LLLHH-----hhhHLLL-----1111

```

```

DSSP  hh1111
Query  dratkr 292
ident
Sbjct  paerdw 315
DSSP  hhhh11

```

No 136: Query=mol1A Sbjct=4fo6A Z-score=6.9

[back to top](#)

```

DSSP ----- 0
Query -----
ident
Sbjct hn1hiteklevlakaysvgdkwralgyakainalksfhkpvtsyqeacsiPgigrmae 60
DSSP  1111hhhhhhhhhhhh111hhhhhhhhhhhhhh111111hhhh111111hhhh

DSSP -----11111111hhhhhh
Query  -----aapyspntlrslrdr 17
ident
Sbjct kiieilesghlrlkldhisesvplvlfnsniwgagtktaqmwyqqgfrsledirsasl 120
DSSP  hhhhhhh111hhhh1111hhhhhhhh11111hhhhhhhh1111hhhhhh111h

DSSP  hhhhhhh1111hhhhHHHHHHHHHHHHHLLL-LLLLLLLEEEHHHHHHhh11111L
Query  ltqaerqgvvfg1QRHVXIVVAQFAATL-TDDTGAPLLLKGGSSLELrrgipdsrT 76
ident  |         |         |         |
Sbjct  qqai glkhysdflerMPREEATEIEQTVQKAAQAFNSGLLCVACGSYRRGK-----aT 173
DSSP  hhhhhhh111hhh11EEHHHHHHHHHHHHHHhLLLLLLEEEELHHHLLL-----1E

DSSP  LLEEEEEEL----1LHHHHHHHHHHHHh111leeEELLEEL11111LLEEEEEEE
Query  SKDFATVAR----rDIELIHQADAGetgwegftAIFTAPEElaapgxpvKPRRFTAKL 132
ident  |         |         |         |
Sbjct  CGDVDVLIThpdggIFSRLDSLREQE-----FLTDDLKVG-----ETKYLGVCR 219
DSSP  ELLEEEEEEL1111HHHHHHHHHHLLL-----LEEEEEEL-----LLEEEEEEL

DSSP  EE11EEEEEEEEEEEL-LLLL111leeeelh1111leeeelh1111HHHHhhhhh
Query  SYrgRAFATVPIEVSSV-EAGNadqfdt1tsdalglvgvpaavavpcxtiPWQIaqlha 191
ident  |
Sbjct  PG--PGRRHRRLDIIVVpYSEF-----aCALL----- 244
DSSP  LL--LLLLLEEEEEEEeHHHH-----hHHHH-----

```

DSSP hh111111111111HHHHHHH-----hhhhh11hHHHHhh  
 Query vtavleepkandraHDLVDLQ-----lleg11ldADLXpt 226  
 ident |  
 Sbjct -----yftgSAHFNRSmralaktgmslsehalstavrnrthgakvpgRVLP-- 292  
 DSSP -----hhhhLHHHHHHhhhhhhhh11lee111leeelle1111lee11EELL--

DSSP HHHHHhhhhhh1111LLLLL1111hhhhhhhh1111111111hhhhhhhhhhhhhh  
 Query RSACIaifearaqHPWPPRVatlpwplyagalegldhlelartvdaaaqavqrfvari 286  
 ident  
 Sbjct TPTEK-----dvfrLLGLPY-----re 309  
 DSSP LLLHH-----hhhhLLLLL-----11

DSSP hh1111  
 Query dratkr 292  
 ident  
 Sbjct paerdw 315  
 DSSP hhhh11

No 137: Query=mol1A Sbjct=1bpzA Z-score=6.9

[back to top](#)

DSSP -----  
 Query ----- 0  
 ident  
 Sbjct kapqetlnggitdmltelanfeknvsqaihknayrkaasviakyphkiksgaeakklpg 60  
 DSSP 1111hhhhhhhhhhhhhhhhhhhh11hhhhhhhhhhhhhhhh111111hhhhhh1111

DSSP -----1111111  
 Query -----aapysp 7  
 ident  
 Sbjct vgtkiaekideflatgklrklekirqddtsssinf1trvsgigpsaarkfvdegiktled 120  
 DSSP 11hhhhhhhhhhhh11hhhhhhhhhhhhhhhh111111hhhhhhhhhh11111hhhh

DSSP 111hhhhhhhhhhhh1111hhhhHHHHHHHHHHHHHH-LLLL1111LLEEEHHHHHH  
 Query ptnlrslrdrltqvaerqgvfgr1qRHVAXIVVAQFAA-TLTDdtGAPLLLKGGSSLE 66  
 ident | |  
 Sbjct lrknedklnhhqriglkyfgdfekriPREEMLQMQDIVLnEVKKvdSEYIATVCGSFRRG 180  
 DSSP hhl1hhhh11hhhhhhhh11hhhh1111LHHHHHHHHHHHHHHHHHH11LLEEEEEE11HHHL

DSSP Hhh1111111LLEEEEEEEL-----1LHHHHHHHHHHHHhh1111eeEEELLE  
 Query LrrgipdsrTSKDFVAR-----rDIELIHEQLADAGetgwegftAIFTAPE 114  
 ident | | | |  
 Sbjct A-----eSSGDMDVLLThpsftsestkkpkLLHQVVEQLQKVH-----FITDTLS 225  
 DSSP L-----1LLEEEEEEEL1111111111hHHHHHHHHHHHLL-----LLEEE

DSSP EL1111111LLEEEEEEEL--LEEEEEEEL--LLL1111leeeehhhh1111  
 Query EIaapgxPKPRRFTAKLSYR--GRAFATVPIEVSSV-EAGNadqfdt1tsdalglvgvp 171  
 ident | |  
 Sbjct KG-----ETKFMGVCQLPSKndEKEYPHRRIDIRLIpKDQY----- 261  
 DSSP LL-----LLEEEEEE1111111111LLEEEEEEeHHHH-----

DSSP 1leeeel1hHHHHHHhhhh1111111111hhhhHHHHHH-----  
 Query aavavpcxtiPWQIAQKlhavtavleepkandrahdldvDLQLE----- 215  
 ident  
 Sbjct -----yCGVLYFT-----gSDIFNKmrahalekgftiney 292  
 DSSP -----hHHHHHH-----1LHHHHHHhhhhhh11lee11

DSSP ----hh11hhhhhhHHHHhhhhhh1111LLLLL1111hhhhhhhh1111111111  
 Query ----gl1ldadlxptRSACIaifearaqHPWPPRVatlpwplyagalegldhlelar 270  
 ident  
 Sbjct tirplgvtgvageplpVDSEK-----difDYIQWK----- 322  
 DSSP leee1111111111111111LHH-----hhhhLLLLL-----

DSSP 1hhhhhhhhhhhhhhhh1111  
 Query tvdaaaqavqrfvaridratkr 292  
 ident





```

aapyspnt 11
ident
Sbjct iaekideflatgklrklekirqddtssinfltrvtgigpsaarklvdegiktledlrkn 120
DSSP hhhhhhhhhhh1111hhhhhhhhhh11hhhhhhhhhh111111hhhhhhhhhh111111hhhhhhhh

DSSP hhhhhhhhhhh1111hhhhhhHHHHHHHHHHHHHHH-LLLL11LLLEEEHHHHHHHHhh1
Query rslrdrltqvaerqgvfgrlqRHVAXIVVAQFAA-TLTDdtGAPLLLKGGSSLELrrg 70
ident |
Sbjct edklnhhqriglkyfedfekriPREEMLQMqDIVLnEVKK1dPEYIATVCGSFRRGA--- 177
DSSP hhh11hhhhhhhh1hhhh11leEHHHHHHHHHHHHHHHHhh1LLEEEELHHHHLLL---

DSSP 1111LLLEEEEEEEL-----1LHHHHHHHHHHHHhh1111eeEEELLEEL11
Query ipdsrTSKDFATVAR-----rDIELIHEQLADAGetgwegftAIFTAPEEIaa 118
ident | |
Sbjct ---eSSGDMDVLLThpnftsesskqpkLLHRVVEQLQKVR-----FITDTLSKG-- 223
DSSP ---1EELLEEEEEE1111111111hhHHHHHHHHHHLLL-----LEEEEEEEL--

DSSP 1111LLLEEEEEEELLeEEEEEEEEEEEL-LLLL1111eeee1hhhh11111eeee
Query pgxpVKPRRFATAKLSYRGraFATVPIEVSSV-EAGNadqfdt1tsdalglvgvpaavavp 177
ident |
Sbjct ---ETKFMGVCQLPSEN-EYPHRRIDIRLIpKDQY----- 254
DSSP ---LEEEEEEELLLL-LLLEEEEEEEL1HHHH-----

DSSP e11hHHHHhhhhhh1111111111HHHHHHH-----hhhhh1
Query cxtiPWQIaqlhavlavlepkandraHDLVDLQ-----llegl1 218
ident |
Sbjct ---yCGVL-----yftgSDIFNKNmrahalekgftineytirplgvgtv 295
DSSP ---hHHHH-----hhh1LHHHHHHHHhhhhhh1lee1111ee111111

DSSP 1hHHHHhhHHHHhhhhhh1111LLLLL1111hhhhhhhh1111111111hhhhhhhh
Query ldADLXptRSACIaifearaqhpWPPRVAtlphwpliyagaleglhdhlelartvdaaaqa 278
ident |
Sbjct agEPLP--VDSEQ-----diFDYIQWR----- 315
DSSP 11LLL--LLLH-----hhHLLL-----

DSSP hhhhhhhhh1111
Query vqrfvaridratkr 292
ident
Sbjct -----yrepkdrse 324
DSSP -----111hhhh111

```

No 140: Query=mol1A Sbjct=7icqA Z-score=6.9

[back to top](#)

```

DSSP -----
Query ----- 0
ident -----
Sbjct etlnggitdmltelanfeknvsqaihkynayrkaasviakyphkiksgaeakklpgvgtk 60
DSSP 1111hhhhhhhhhhhhhhhh1111hhhhhhhhhhhhhhhh111111hhhhhh11111hh

DSSP -----111111111h
Query -----aapyspnt1 11
ident -----
Sbjct iaekideflatgklrklekirqddtssinfltrvsgigpsaarkfvdegiktledlrkn 120
DSSP hhhhhhhhh1111hhhhhhhhhhhhhhhh111111hhhhhhhh11111hhhhhh1

DSSP hhhhhhhhhhh1111hhhhhhHHHHHHHHHHHHH-LLLL11LLLEEEHHHHHHHHhh1
Query rslrdrltqvaerqgvfgrlqRHVAXIVVAQFAA-TLTDdtGAPLLLKGGSSLELrrg 70
ident |
Sbjct edklnhhqriglkygdfekriPREEMLQMqDIVLnEVKKvdSEYIATVCGSFRRGA--- 177
DSSP hhh11hhhhhhhh1hhhh11leEHHHHHHHHHHHHHHHHhh1LLEEEELLLLLLLL---

DSSP 1111LLLEEEEEEEL-----1LHHHHHHHHHHHHhh1111eeEEELLEEL11
Query ipdsrTSKDFATVAR-----rDIELIHEQLADAGetgwegftAIFTAPEEIaa 118
ident | |
Sbjct ---eSSGDMDVLLThpsftsestqpkLLHQVVEQLQKVH-----FITDTLSKG-- 223
DSSP ---1EELLEEEEEE1111111111hhHHHHHHHHHHLLL-----LEEEEEEEL--

```

DSSP 1111LLEEEEEEEEEEL--EEEEEEEEEEEL-LLLL1111eeeee1hhhh1111lee  
Query pgxpVKPRRFTAKLSYRG--RAFATVPIEVSSV-EAGNadqfdtlttsdalglvgpaava 175  
ident | |  
Sbjct ----ETKFMGVCQLPSKNdeKEYPHRRIDIRLIpKDQY----- 257  
DSSP ----LLEEEEEELLLLL11LLLLLEEEEEEEELHHHH-----

DSSP eeellhHHHHHHhhhhhh1111111111hhhhHHHHHH-----  
Query vpcxtiPWQIAqklhavtavleepkandrahd1vDLQLE----- 215  
ident | |  
Sbjct ----yCGVLYF-----tgSDIFNKmrahalekgftineytirp 292  
DSSP ----hHHHHHH-----h1LHHHHHHhhhhhhhh1leeell1lee

DSSP --h11hhhhhhhhHHHHhhhhhh1111LLLLL1111hhhhhhhh111111111hh  
Query --gllldadlxptrSACIaifearaqhpWPPRVat1phwplyagalegldhlelartvd 273  
ident | |  
Sbjct lgvtgvageplpvdSEKD-----ifdYIQWK----- 318  
DSSP 111111111111LHHH-----hhhLLLL-----

DSSP hhhhhhhhhhhhh1111  
Query aaaqavqrfvaridratkr 292  
ident | |  
Sbjct -----yrepkdrse 327  
DSSP -----111hh111

No 141: Query=mol1A Sbjct=9ictA Z-score=6.9

[back to top](#)

DSSP -----  
Query ----- 0  
ident | |  
Sbjct etlnggitdmltelanfeknvsqaihkynayrkaasviakyphkiksgaeakklpgvgtk 60  
DSSP 1111hhhhhhhhhhhhhhhh1111hhhhhhhhhhhhhh111111hhhh11111hh

DSSP -----111111111h  
Query -----aapyspptnl 11  
ident | |  
Sbjct iaekideflatgklrklekirqddtsssinf1trvsgigpsaarkfvdegiktledlrkn 120  
DSSP hhhhhhhhh1111hhhhhh1111hhhhhhhh111111hhhhhhhh11111hhhhhh1

DSSP hhhhhhhhhhh1111hhhhHHHHHHHHHHHHHH-LLLL11LLLLEEEEHHHHHHhh1  
Query rslrdrltqvaerqgvfgrlqRHVAXIVVAQFAA-TLTDdtGAPLLLKGGSSLELrrg 70  
ident | |  
Sbjct edklnhhqriglkyfgdfekriPREEMLMQDIVLnEVKKvdSEYIATVCGSFRGA--- 177  
DSSP 11111hhhhhhhh11hhhh11eEHHHHHHHHHHHHHHHHHh1LLEEEELHHHHLL---

DSSP 1111LLEEEEEEL-----1LHHHHHHHHHHHHhh1111eeEELLEEL11  
Query ipdsrTSKDFATVAR-----rDIELIHEQLADAGetgwegftAIFTAPEEIaa 118  
ident | | | | | |  
Sbjct ----eSSGMDVLLThpsftsestkpklLHQVVEQLQKVH-----FITDTLSKG-- 223  
DSSP ----1EELLEEEEE1111111111hhHHHHHHHHHLL-----LEEEEEEL--

DSSP 1111LLEEEEEEEEEEL--EEEEEEEEEEEL-LLLL1111eeeee1hhhh1111lee  
Query pgxpVKPRRFTAKLSYRG--RAFATVPIEVSSV-EAGNadqfdtlttsdalglvgpaava 175  
ident | |  
Sbjct ----ETKFMGVCQLPSKNdeKEYPHRRIDIRLIpKDQY----- 257  
DSSP ----LLEEEEEELLLLL11LLLLLEEEEEEEELHHHH-----

DSSP eeellhHHHHHHhhhhhh1111111111hhhhHHHHHH-----  
Query vpcxtiPWQIAqklhavtavleepkandrahd1vDLQLE----- 215  
ident | |  
Sbjct ----yCGVL-----yftgSDIFNKmrahalekgftineytirp 292  
DSSP ----hHHHH-----hhh1LHHHHHHhhhhhhhh1leeell1lee

DSSP -h11hhhhhhhhHHHHhhhhhh1111LLLLL1111hhhhhhhh111111111hh  
Query -gllldadlxptrSACIaifearaqhpWPPRVat1phwplyagalegldhlelartvda 274

```

-----
Sbjct lgvtgvageplpVDSEK-----difDYIQW----- 317
DSSP 11111111111LLLHH-----hhhHLLL-----

```

```

DSSP hhhhhhhhhhhhhh1111
Query aaqavqrfvaridratkr 292
ident
Sbjct -----kyrepkdrse 327
DSSP -----1111hhhh1

```

No 142: Query=mol1A Sbjct=9icvA Z-score=6.9

[back to top](#)

```

DSSP ----- 0
Query -----
ident
Sbjct etlnggitdmltelanfknvsqaihknayrkaasviakyphkiksgaeakklpgvgtk 60
DSSP 1111hhhhhhhhhhhhhhh111hhhhhhhhhhhhhh111111hhhh11111hh

```

```

DSSP -----111111111hh
Query -----aapyssptnl 11
ident
Sbjct iaekideflatgklrklekirqddtssinfltrvsgigpsaarkfvdegiktledlrkn 120
DSSP hhhhhhhhhhh1111hhhhhhhhhhhhhhhh111111hhhhhhhhhh1111hhhhhhhh1

```

```

DSSP hhhhhhhhhhh1111hhhhHHHHHHHHHHHHH-LLLL11LLLLEEEHHHHHHHHhh1
Query rslrdr1tqvaerqgvfgrlqRHVAXIVVAQFAA-TLTDdtGAPLLLVKGGSSLELrrg 70
ident
Sbjct edklnhhqriglkyfgdfekriPREEMLMQDIVLnEVKKvdSEYIATVCGSFRRGAAA--- 177
DSSP hhh11hhhhhhhhhh11eEHHHHHHHHHHHHHHHHhh1LLLEEEELLLLLLL---

```

```

DSSP 11111LLLLEEEEL-----1LHHHHHHHHHHHHHHh1111eeEELLLEEL11
Query ipdsrTSKDFATVAR-----rDIELIHEQLADAGetgewgftAIFTAPEEIaa 118
ident
Sbjct ---eSSGDMDVLLThpsftsestkpqkLLHQVVEQLQKVH-----FITDTLSKG-- 223
DSSP ---LEELLEEEEEE111111111hhHHHHHHHHHHHHLL-----LEEEEEEEL--

```

```

DSSP 1111LLLLEEEEEEEL--EEEEEEEEEEEL-LLLL1111eeeee1hhhh11111lee
Query pgxpVKPRRFTAKLSYRG--RAFATVPIEVSSV-EAGNadqfdtltsdalglvgvpaava 175
ident
Sbjct ---ETKFMGVCQLPSKNdeKEYPHRRIDIRLIpKDQY----- 257
DSSP ---LEEEEEEELLLLL11LLLLEEEEEEeHHHH-----

```

```

DSSP ee11hhHHHHhhhhhh1111111111hhhhHHHHH-----
Query vpcxtiPWQIaqlhavlavepkandrahdlvDLQLE----- 215
ident
Sbjct -----yCGVL-----yftgSDIFNKnmrahaalekgftineytirp 292
DSSP -----hHHHH-----hhh1LHHHHhhhhhhhh1lee1111lee

```

```

DSSP -hh11hhhhhhHHHHHHhhhh1111LLL11111hhhhhhhh111111111hh
Query -g11ldadlxptRSACIAifearaqhpWPPRVatlphwpliyagaleghlelartvda 274
ident
Sbjct lgvtgvageplpVDSEKD-----ifdYIQWK----- 318
DSSP 11111111111LLLHH-----hhhHLLL-----

```

```

DSSP hhhhhhhhhhhhhh1111
Query aaqavqrfvaridratkr 292
ident
Sbjct -----yrepkdrse 327
DSSP -----111hhh111

```

No 143: Query=mol1A Sbjct=9ickaA Z-score=6.9

[back to top](#)

```

Query ----- 0
ident
Sbjct etlnggitdmltelanfeknvsqaihknayrkaasviakyphkiksgaeakklpgvgtk 60
DSSP 1111hhhhhhhhhhhhhhhh1111hhhhhhhhhhhhhhhh111111hhhhh11111hh

DSSP -----111111111h
Query -----aapyspntnl 11
ident
Sbjct iaekideflatgklrklekirqddtssinfltrvsgigpsaarkfvdegiktledlrkn 120
DSSP hhhhhhhhh1111hhhhhhhhhhhhhhhh111111hhhhhhhh11111hhhhhh1

DSSP hhhhhhhhhhh1111hhhhhhHHHHHHHHHHHHHH-LLLL11LLLEEEHHHHHHHHh1
Query rslrdrltqvaerqgvfgrlqRHVAXIVVAQFAA-TLTDdtGAPLLLKGGSSLELrrg 70
ident | |
Sbjct edklnhhqriglkygdfekriPREEMLQMQDIVLnEVKKvdSEYIATVCGSFRGA--- 177
DSSP hhh11hhhhhhhh1hhhhhh1eHHHHHHHHHHHHHHHHHH1LLEEEELHHHHLL---

DSSP 11111LLLEEEEL-----1LHHHHHHHHHHHHhh1111eeEEELLEEL11
Query ipdsrTSKDFATVAR-----rDIELIHEQLADAGetgwegftAIFTAPEEIAa 118
ident | | | |
Sbjct ---eSSGDMVDVLLThpsftsestqpkLLHQVVEQLQKVH-----FITDTLSKG-- 223
DSSP ---1EELLEEEEEEe1111111111hHHHHHHHHHHLL-----LEEEEEEEL--

DSSP 1111LLLEEEEEEEL--EEEEEEEEEEEL-LLLL1111eeeee1hhhh11111ee
Query pgxpVKPRRFTAKLSYRG--RAFATVPIEVSSV-EAGNadqfdlttsdalglvgvpaava 175
ident | |
Sbjct ---ETKFMGVCQLPSKNdeKEYPHRRIDIRLIpKDQY----- 257
DSSP ---LLEEEEEEELLLL11LLLEEEEEEeHHHH-----

DSSP eeellhHHHHhhhhhhhh1111111111hhhhHHHHHH-----
Query vpcxtiPWQIaqlhavlavlepkandrahdlvDLQLE----- 215
ident
Sbjct ---yCGVL-----yftgSDIFNKnmrahalekgftineytirp 292
DSSP ---hHHHH-----hhh1LHHHHhhhhhhhh1lee1111ee

DSSP --hh11hhhhhhhhHHHHhhhhhh1111LLLL11111hhhhhhhh111111111hh
Query --gllldadlxptrSACIaifearaqhpWPPRVatlpwplyagalegdhlelartvd 273
ident |
Sbjct lgvtgvageplpvdSEKD-----ifdYIQWK----- 318
DSSP 1111111111111LHHH-----hhhLLLL-----

DSSP hhhhhhhhhhhhh1111
Query aaaqavqrfvaridrskr 292
ident
Sbjct -----yrepkdrse 327
DSSP -----1111hhhh11

```

No 144: Query=mol1A Sbjct=7ichA Z-score=6.9

[back to top](#)

```

DSSP ----- 0
Query -----
ident
Sbjct etlnggitdmltelanfeknvsqaihknayrkaasviakyphkiksgaeakklpgvgtk 60
DSSP 1111hhhhhhhhhhhhhhhh1111hhhhhhhhhhhhhhhh111111hhhhh11111hh

DSSP -----111111111h
Query -----aapyspntnl 11
ident
Sbjct iaekideflatgklrklekirqddtssinfltrvsgigpsaarkfvdegiktledlrkn 120
DSSP hhhhhhhhh1111hhhhhhhhhhhhhhhh111111hhhhhhhh11111hhhhhh1

DSSP hhhhhhhhhhh1111hhhhhhHHHHHHHHHHHHHH-LLLL11LLLEEEHHHHHHHHh1
Query rslrdrltqvaerqgvfgrlqRHVAXIVVAQFAA-TLTDdtGAPLLLKGGSSLELrrg 70
ident | |
Sbjct edklnhhqriglkygdfekriPREEMLQMQDIVLnEVKKvdSEYIATVCGSFRGA--- 177
DSSP hhh11hhhhhhhh1hhhhhh1eHHHHHHHHHHHHHHHHHH1LLEEEELHHHHLL---

```

DSSP #####

DSSP 11111LLEEEEEEL-----1LHHHHHHHHHHhh1111eeEEELLLEEL11
Query ipdsrTSKDFATVAR-----rDIELIHEQLADAGetgwegftAIFTAPEEIaa 118
ident | | || |
Sbjct ---eSSGDMDVLLThpsftsestkpqkLLHQVVEQLQKVH-----FITDTLSKG-- 223
DSSP ---1EELLEEEEEEL1111111111hHHHHHHHHHHLL-----LEEEEEEL--

DSSP 1111LLEEEEEEEEEELL--EEEEEEEEEEEL-LLLL1111eeeee1h1111lee
Query pgxpVKPRRFTAKLSYRG--RAFATVPIEVSSV-EAGNadqfdt1tsdalglvgpaava 175
ident | |
Sbjct ---ETKFMGVCQLPSKNdeKEYPHRRIDIRLIpKDQY----- 257
DSSP ---LLEEEEEELLLLLL11LLLLLEEEEEEEEL1HHHH-----

DSSP ee11hHHHHhhhhhhhh1111111111hHHHHHHHH-----
Query vpcxtiPWQIaqklhavtavleepkandrahd1vDLQLE----- 215
ident
Sbjct ---yCGVL-----yftgSDIFNKmrahalekgftineytirp 292
DSSP ---hHHHH-----h11LHHHHhhhhhhhh1leee1leeee

DSSP -h11hHHHHhhHHHHhhhh1111L1111hHHHHhhhh1111111111h
Query -gl1ldadlxptRSACIAifearaqhpWPPRVat1phwpliyagalegldhlelartvda 274
ident
Sbjct lgv1gvageplpVDSEKD-----ifdYIQWK----- 318
DSSP 111111111111L1111111111hHHHH-----

DSSP hhhhhhhhhhhhh1111
Query aaqavqrfvaridratkr 292
ident
Sbjct -----yrepkdrse 327
DSSP -----111hh111

No 145: Query=mol1A Sbjct=7icvA Z-score=6.9

back to top

DSSP -----
Query ----- 0
ident
Sbjct etlnggitdmltelanfeknvsqaihknayrkaasviakyphkiksgaeakklpgvgtk 60
DSSP 1111hHHHHhhhhhhhh1111hHHHHhhhhhhhh11111111hHHHH111111h

DSSP -----111111111h
Query -----aapyspntl 11
ident
Sbjct iaekideflatgklrklekirqddtsssinf1trvsgigpsaarkfydegiktledlrkn 120
DSSP hhhhhhhhh1111hHHHHhhhhhh11111111hHHHHhh111111hHHHH1

DSSP hhhhhhhhhhh1111hHHHHHHHHHHHHHHHH-LLLL11LLEEEEEHHHHHHhh1
Query rslrdrltqvaerqgvfgr1qRHVAXIVVAQFAA-TLTDdtGAPLLLVKGGSSLELrrg 70
ident | |
Sbjct edklnhhqriglkyfgdfekriPREEMLQMqDIVLnEVKkVdSEYIATVCGSFRRGA--- 177
DSSP hhh11hHHHHhhhhhh11eEHHHHHHHHHHHHHHHH1LLEEEEEELLLLLL---

DSSP 11111LLEEEEEEL-----1LHHHHHHHHHHhh1111eeEEELLLEEL11
Query ipdsrTSKDFATVAR-----rDIELIHEQLADAGetgwegftAIFTAPEEIaa 118
ident | | || |
Sbjct ---eSSGDMDVLLThpsftsestkpqkLLHQVVEQLQKVH-----FITDTLSKG-- 223
DSSP ---1EELLEEEEEEL1111111111hHHHHHHHHHHLL-----LEEEEEEL--

DSSP 1111LLEEEEEEEEEELL--EEEEEEEEEEEL-LLLL1111eeeee1h1111lee
Query pgxpVKPRRFTAKLSYRG--RAFATVPIEVSSV-EAGNadqfdt1tsdalglvgpaava 175
ident | |
Sbjct ---ETKFMGVCQLPSKNdeKEYPHRRIDIRLIpKDQY----- 257
DSSP ---LLEEEEEELLLLLL11LLLLLEEEEEEEELHHHH-----

DSSP ee11hHHHHhhhhhhhh1111111111hHHHHHHHH-----

```

query vpsaqlt qvqqlmrlt vltvcpkmlt dmlt lzzqzzl 219
ident
Sbjct -----yCGVL-----yftgSDIFNKnmrahalekgftineytirp 292
DSSP ----hHHHH-----hhh1LHHHHHHhhhhhhhh1leeel111lee

```

```

DSSP --hh11hhhhhhhhHHHHhhhhhh1111LLLLL11111hhhhhhhhhh1111111111hh
Query --gllldadlxptrSACIaifearaqhpWPPRVatlphwpli yagalegldhlelartvd 273
ident
Sbjct lgtgvageplpvdSEKD-----ifdYIQWK----- 318
DSSP 11111111111111LHHH-----hhhHLLL-----

```

```

DSSP hhhhhhhhhhhhhhh1111
Query aaaqavqrfvaridratkr 292
ident
Sbjct -----yrepkdrse 327
DSSP -----111hhhh11

```

No 146: Query=mol1A Sbjct=7icjA Z-score=6.9

[back to top](#)

```

DSSP -----
Query ----- 0
ident
Sbjct etlnggitdmltelanfeknvsqaihkynayrkaasviakyphkiksgaeakklpgvgtk 60
DSSP 1111hhhhhhhhhhhhhhhh1111hhhhhhhhhhhhhhhh111111hhhh111111hh

```

```

DSSP -----1111111111h
Query -----aapyspsptnl 11
ident
Sbjct iaekideflatgklrklekirqddtssinfltrvsgigpsaarkfvdegiktledlrkn 120
DSSP hhhhhhhhhhh1111hhhhhh111hhhhhhhhhh11111hhhhhhhhhh1111hhhhhh11

```

```

DSSP hhhhhhhhhhhhh1111hhhhHHHHHHHHHHHHHH-LLLL11LLLEEEEEHHHHHHhh1
Query rslrdr1tqvaerqgvfgrlqRHVAXIVVAQFAA-TLTDdtGAPLLLKGGSSLELrrg 70
ident
Sbjct edklnhhqriglkyfgdfekriPREEMLQMqDIVLnEVKkvdSEYIATVCGSFRGA--- 177
DSSP hhh11hhhhhhhh111hhhh1leHHHHHHHHHHHHHHHHhh1LLLLLLLLLLLLLLL---

```

```

DSSP 11111LLLEEEEL-----1LHHHHHHHHHHHHhh1111eeEEELLEEL11
Query ipdsrTSKDFATVAR-----rDIELIHEQLADAGetgwegftAIFTAPEEIaa 118
ident
Sbjct ----eSSGDMDVLLThpsftsestkpkLLHQVVEQLQKVH-----FITDTLSKG-- 223
DSSP ----1EELLEEEEL11111111111hHHHHHHHHHHHLL-----LEEEEEEEL--

```

```

DSSP 1111LLLEEEEEEEEL--EEEEEEEEEEELLLL1111eeee1hhhh11111lee
Query pgxpVKPRRFTAKLSYRG--RAFATVPIEVSSVEAGNAdqfdt1tsdalglvgvpaavav 176
ident
Sbjct ---ETKFMGVCQLPSKNdeKEYPHRRIDIRLIPKDQY----- 257
DSSP ---LLEEEEEEELLLL1111LLLEEEEEEELHHHH-----

```

```

DSSP eellhHHHHHHhhhhhh1111111111hhhhHHHHHH-----
Query pcxtiPWQIAQklhavtavleepkandrahd1vDLQLE----- 215
ident
Sbjct ---yCGVLYF-----tgSDIFNKnmrahalekgftineytirpl 293
DSSP ---hHHHHHH-----h1LHHHHHHhhhhhhhh1lee1111lee1

```

```

DSSP -hh11hhhhhhhhHHHHhhhhhh1111LLLLL11111hhhhhhhhhh1111111111hh
Query -gllldadlxptrSACIaifearaqhpWPPRVatlphwpli yagalegldhlelartvda 274
ident
Sbjct gvtgvageplpvdSEKD-----ifdYIQWK----- 318
DSSP 11111111111111LLH-----hhhHLLL-----

```

```

DSSP hhhhhhhhhhhhhhh1111
Query aaqavqrfvaridratkr 292
ident
Sbjct -----yrepkdrse 327
DSSP -----111hhhh11

```







DSSP -----  
Query RRF TAKLSYRGRAFATVPIEVSSV-EAGNadqfdtlttsdalglvgvpaavavpcxtiPWQ 184  
ident | |  
Sbjct FMGVCQLPSDEKEYPHRRIDIRLIpKDQY-----yCGV 252  
DSSP EEEEELLLLLLLLLLLLLEEEEEELHHHH-----hHHH

DSSP Hhhhhhhhh1111111111hhhhHHHHHHH---h11hhHHHHhhHHHH-----  
Query Iaqlh'avtavleepkandrahdLvDLQLEGG---111dadLXPTrsACIA----- 232  
ident |  
Sbjct L-----yftgSDIFNKNmrahaIekgFTIN-eYTIrplgtgvag 291  
DSSP H-----hhh1LHHHHHHhhhhhh111EEL-1LLEEe1111111

DSSP hHHHH---1111LLLLL1111hhhhhhhhhh1111111111hhhhhhhhhhhhhhhh  
Query iFEAR---aqhpWPPRVat1phwpliYagalegldhlelartvdaaaqavqrfvaridr 288  
ident |  
Sbjct ePLPVdsekdfidYIQWK-----yrepk 314  
DSSP 1LLL11hhhhhhHLLL-----111hh

DSSP 1111  
Query atkr 292  
ident  
Sbjct drse 318  
DSSP h111

No 150: Query=mol1A Sbjct=5ddyC Z-score=6.9

[back to top](#)

DSSP -1111111111hhhhhhhhhhHHLL-----  
Query -aapyspptn1rslrdltqvaERQG----- 26  
ident  
Sbjct atnlnhiteklevlakaysvqgDKWRalgyakainalksfhkpvtisyqeacsipgigkr 60  
DSSP 1111hhhhhhhhhhhhhhhh1LHHHHhhhhhhhhhhhh111111hhhhhh111111

DSSP -----  
Query ----- 26  
ident  
Sbjct maekiieilesghlrkldhisesvpvlelfsniwgagtktaqmwyqgfrsleldirsqas 120  
DSSP hhhhhhhhhhh1111111111hhhhhhhh111111hhhhhhhhhh1111hhhhhh11

DSSP -----11hhhhHHHHHHHHHHHLL-LLLLLLLEEEHHHHHHhh1111  
Query -----vvfgrlqRHVAXIVVAQFAAT-LTDDTGAPLLLKGGSSLELrrgipd 73  
ident | |  
Sbjct lttqqaiglkhydf1ermPREEATEIEQTVQKaAQAFNSGLLCVACGSYRRGK----- 174  
DSSP 11hhhh1111hhhh111eHHHHHHHHHHHHHHHHHLLLEEEELHHHHLL-----

DSSP 11LLLLEEEEL-----1LHHHHHHHHHHHHhh1111eeEELL-LEELLLL1LLL  
Query srTSKDFATVAR-----rDIELIHEQLADAGetgwegftaIFTA-PEEIAAPGxPVK 124  
ident | | | |  
Sbjct -aTCGDVDVLIThpdgrshrgIFSRLDLSLRQEG-----FLTDdLVSQEENG-QQQ 223  
DSSP -1EELEEEEEE11111111HHHHHHHHHHHLL-----LLL1L1LLEEL-LEE

DSSP LEEEEEEEE11EEEEEEEEEEEL-LLLL1111eeeee1hhhh111111eeeee1hHH  
Query PRRFTAKLSYrgRAFATVPIEVSSV-EAGNadqfdtlttsdalglvgvpaavavpcxtiPW 183  
ident | |  
Sbjct KYLGVCRLPG--PGRRHRRLDIIIVpYSEF-----aCA 254  
DSSP EELLEEEELL--LLLLEEEEEEEL1HHHH-----hHH

DSSP HHHhhhhhh1111111111HHHHHHHHhhhh11hhhhhhhhhhHHHH-----  
Query QIaqlh'avtavleepkandraHDLVDLQ1legl1dadlxptrsaciAIFE----- 235  
ident |  
Sbjct LL-----yftgSAHFNRs-----mralaktkgmslseHALStavrnth 293  
DSSP HH-----hh1LHHHHHH-----hhhhhh11ee1LLEEe1111111

DSSP -----hh1111LLLLL1111hhhhhhhh1111111111hhhhhhhhhh  
Query -----araqhpPPRVat1phwpliYagalegldhlelartvdaaaqavqrf 282  
ident  
Sbjct gckvpggrvlp1ptekdvfrLLGLP----- 318

DSSP -----

DSSP hhhhhh1111  
Query varidratkr 292  
ident  
Sbjct -yrepawrdw 327  
DSSP -111hhh111

No 151: Query=mol1A Sbjct=3rjgA Z-score=6.9

[back to top](#)

DSSP -----  
Query ----- 0  
ident  
Sbjct tlnggitdmltelanfeknvsqaihkynayrkaasviakypkiksgaeakklpgvgtki 60  
DSSP 111hhhhhhhhhhhhhhhh111hhhhhhhhhhhhhhhh111111hhhh11111hh

DSSP -----111111111hh  
Query -----aapyspptnlr 12  
ident  
Sbjct aekideflatgklrklekirqdtssinfltrvsgigpsaarkfvdegiktledlrkne 120  
DSSP hhhhhhhhh111hhhhhhhh1hhhhhhhh111111hhhhhhhh11111hhhh11h

DSSP hhhhhhhhhhh1111hhhhHHHHHHHHHHHH-LLLL111LLLEEEHHHHHHhh11  
Query slrdrltqvaerqgvfgrlqRHXIVVAQFAA-TLTDdtGAPLLLKGGSSLELrgi 71  
ident  
Sbjct dklnhhqrigrkyfgdfekriPREEMLMQDIVLnEVKKvdSEYIATVCGSFRRGA---- 176  
DSSP hhl1hhhhhhhh1hhhh111eHHHHHHHHHHHHHHHHHH11LLLEEEELHHHLLL----

DSSP 1111LLLEEEEL-----1LHHHHHHHHHHHHhh1111eeEELLLEEL111  
Query pdsrTSKDFATVAR-----rDIELIHEQLADAGetgwegftAIFTAPEElaap 119  
ident  
Sbjct ---eSSGDMVLLThpsftsesttkqpkLLHQVVEQLQKVH-----FITDTLSKG--- 222  
DSSP ---1EELLEEEEEE111111111111HHHHHHHHHHLL-----LEEEEEEEL---

DSSP 111LLLEEEEEEEL--LEEEEEEEL-LLL11111eeehhhh11111ee  
Query gxpVKPRRFTAKLSYR--GRAFATVPIEVSSV-EAGNadqfdtlttsdalglvgsaavav 176  
ident  
Sbjct ---ETKFMGVCQLPSKndEKEYPHRRIDIRLIpKDQY----- 256  
DSSP ---LEEEEEEELLLL111111111111HHHHHHHHHHLL-----

DSSP ee11hHHHHhhhhhh1111111111hhhhHHHHHH-----  
Query pcxtiPWQIaqk1havtavleepkandrahd1vDLQLE----- 215  
ident  
Sbjct ---yCGVL-----yftgSDIFNKnmrahalekgftineytirpl 292  
DSSP ---hHHHH-----hh1LHHHHhhhhhh111ee111ee1

DSSP -hh1hhhhhhhhHHHHhhhhhh1111111111hhhhhhhh111111111hh  
Query -g11dadlxptrSACIaifearaqhPWPPRVat1phwpliyagalegldhlelartvda 274  
ident  
Sbjct gvtgvageplpvdSEKD-----ifDYIQWK----- 317  
DSSP 111111111111LHHH-----hhHLLLL-----

DSSP hhhhhhhhhhh1111  
Query aaqavqrfvaridratkr 292  
ident  
Sbjct -----yrepkdrse 326  
DSSP -----111hhh111

No 152: Query=mol1A Sbjct=1zqwA Z-score=6.9

[back to top](#)

DSSP -----111111111hhhhhhhhhhhh1111hhhh  
Query -----aapyspptnlrs1rdrltqvaerqgvfgrlq 33

```

ident
Sbjct ddtssinfltrvtgigpsaarklvdegiktleldrknedklnhhqriglkyfedfekri 60
DSSP 111hhhhhhhh111111hhhhhhhhhh111111hhhhhhhh1hhhh1hhhhhhhhhh111hhhhll

DSSP HHHHHHHHHHHHHHLL-LLLLLLLLLEEEHHHHHHHHhh111111LLLEEEEL-----
Query RHVAXIVVAQFAATL-TDDTGAPLLLKVGGSLELrrgipdsrTSKDFATVAR----- 85
ident
Sbjct PREEMLQMQDIVLNEvKKLDPEYIATVCGSFRRGA-----eSSGDMVLLThpnftse 113
DSSP EHHHHHHHHHHHHHHHLLLEEEELHHHHLLL-----1EELLEEEEEE111111

DSSP -----1LHHHHHHHHHHHHhh1111eeEEELLEEL111111LLLEEEEEEEELLeEEE
Query -----rDIELIHEQLADAGetgwegftAIFTAPEEIIaapgxPKPRRFTAKLSYRGrAFA 140
ident
Sbjct sskqpkLLHRVVEQLQKVR-----FITDTLSKG-----ETKFMGVCQLPSEN-EYP 158
DSSP 1111hhHHHHHHHHHHLL-----LEEEEEEEL-----LLEEEEEE111111-LLL

DSSP EEEEEEEEL-LLLL1111eeeee1hhhh111111eeeee1hHHHHhhhhhhhh111111
Query TVPIEVSSV-EAGNadqfdlttsdalglvgvpaavavpcxtiPWQIaqklhavtavleep 199
ident
Sbjct HRRIDIRLIpKDQY-----yCGVL----- 177
DSSP LEEEEEEEL1HHHH-----hHHHH-----

DSSP 111111hhhhHHHHHH-----hh11hhhhhhHHHHHHhhhhhh1
Query kandrahdlvDLQLE-----gllldadlxpRSACIaifeara 238
ident
Sbjct -----yftgSDIFNKmrahalekgftineytirplgvtgvageplpVDSEQ----- 224
DSSP -----hhh1LHHHHHHHHhhhhhh1leeel1111eeel111111111111LLHH-----

DSSP 111111111111hhhhhhhhhh111111111111hhhhhhhhhhhhhhhhhh1111
Query qhpWPPRVAtlphwpliyagaleglhdhlelartvdaaaqavqrfvaridratkr 292
ident
Sbjct difDYIQWR-----yrepkdrse 242
DSSP hhhHLLLL-----111hhhh111

```

No 153: Query=mol1A Sbjct=5j0xA Z-score=6.9

[back to top](#)

```

DSSP -----
Query ----- 0
ident
Sbjct apqetlnggitdmltelanfeknvsqaihkynayrkaasviakyphkiksgaeakklpgv 60
DSSP 1111111hhhhhhhhhhhhhhhh1111hhhhhhhhhhhhhhhh1111111hhhhhh1111

DSSP -----11111111
Query -----aapysspp 8
ident
Sbjct gtkiaekideflatgklrklekirqddtssinfltrvsgigpsaarkfvdegiktleldr 120
DSSP 1hhhhhhhhhhhhhh111hhhhhhhh1hhhhhhhhhh1111111hhhhhhhhhh111111hhhh

DSSP 11hhhhhhhhhhhhhh1111hhhhHHHHHHHHHHHHHHH-LLLL1111LLLEEEHHHHHHH
Query tnlrslrdrltqvaerqgvfgrlqRHVAXIVVAQFAA-TLTDdtGAPLLLKVGGSLEL 67
ident
Sbjct rknedklnhhqriglkyfgdfekriPREEMLQMQDIVLnEVKKvdSEYIATVCGSFRRGA 180
DSSP h11hhhh11hhhhhhhh1hhhh111eEHHHHHHHHHHHHHHHHhh1111LEEEELHHHHLLL

DSSP hh111111LLLEEEEL-----1LHHHHHHHHHHHHhh1111eeEEELLEEL1
Query rrgipdsrTSKDFATVAR-----rDIELIHEQLADAGetgwegftAIFTAPEEia 117
ident
Sbjct -----eSSGDMVLLThpsftsestpkLLHQVVEQLQKVH-----FITDTLSK-- 223
DSSP -----1EELLEEEEEE111111111111HHHHHHHHHHHLL-----LEEEEEE--

DSSP 111111LLLEEEEEEEL--LEEEEEEEL-LLLL1111eeeee1hhhh111111e
Query apgxPKPRRFTAKLSYR--GRAFATVPIEVSSV-EAGNadqfdlttsdalglvgvpaav 174
ident
Sbjct -----gETKFMGVCQLPSKndEKEYPHRRIDIRLIpKDQY----- 258
DSSP -----1LLEEEEEE111111111111LLLEEEEEEEL1HHHH-----

```

```

DSSP eeee1hHHHHhhhhhhhh1111111111HHHH-----hhhhhhh
Query avpcxtiPWQIaqlhvtavleepkandraHDLV-----dlqllegl 217
ident
Sbjct -----yCGVL-----yftgSDIFnknmrahalekgftineytirplgv 296
DSSP -----hHHHH-----hhh1LHHHHhhhhhhhhhh1lee111lee111

DSSP 11hhhhhhhhHHHHhhhhhh111LLLLL11111hhhhhhhh111111111hhhhhh
Query lldadlxptrSACIAifearaqhPWPPRvatlphwpliyagalegldhlelartvdaaaq 277
ident
Sbjct tgvageplpvDSEKD-----ifdYIQWK----- 319
DSSP 1111111111LHHH-----hhhLLLL-----

DSSP hhhhhhhhhhh1111
Query avqrfvaridratkr 292
ident
Sbjct -----yrepkdrse 328
DSSP -----111hh111

```

No 154: Query=mol1A Sbjct=4ub1A Z-score=6.9

[back to top](#)

```

DSSP -----
Query ----- 0
ident
Sbjct nggitdmltelanfekonvsqaihknayrkaasviakypkiksgaeaklpgvgtkiae 60
DSSP 1hhhhhhhhhhhhhhhh1111hhhhhhhhhhhhhh111111hhhhhh11111hhhhhh

DSSP -----111111111hhhh
Query -----aapyspptnlrsl 14
ident
Sbjct kideflatgklrklekirqddtssinfltrvsgigpsaarkfvdegiktledlrknedk 120
DSSP hhhhhhhhh111hhhhhhhh1hhhhhhhhhh111111hhhhhhhhhh1111hhhhhhhhhh

DSSP hhhhhhhhh111hhhhhhHHHHHHHHHHHHH-LLLL11LLLEEEHHHHHHHHhh1111
Query rdr1tqvaerqgvfgrlqRHVAXIVVAQFAA-TLTDdtGAPLLLKGGSSLELrrgipd 73
ident
Sbjct lnhhqriglkyfgdfekriPREEMLQMqDIVLnEVKKvdSEYIATVCGSFRRGA----- 174
DSSP 11hhhhhhhh1hhhh111eHHHHHHHHHHHHHHHHHHh1LLEEEELHHHLLL-----

DSSP 11LLLEEEEL-----1LHHHHHHHHHHHHhh1111eeEEELLEE111111L
Query srTSKDFATVAR-----rDIELIHEQLADAGetgwegftAIFTAPEEiaapgxpv 123
ident
Sbjct -eSSGDMVLLThpsftseseqpkLLHQVVEQLQKVH-----FITDTLSK-----gE 219
DSSP -1EELEEEEEE1111111111HHHHHHHHHHHLL-----LEEEEEE-----1L

DSSP LLEEEEEEEELLEEEEEEEEEEEL-LLLL111leeeelhhhh11111leeeelhh
Query KPRRFtAKLSYRGRAFATVPIEVSSV-EAGNadqfdt1tsdalglvgvpaavavpcxtiP 182
ident
Sbjct TKFMGVCQLPSKEKEYPHRRIDIRLIpKDQY-----yC 252
DSSP LEEEEELLLLLLLLLLEEEEEEL1HHHH-----hH

DSSP HHHhhhhhhhh1111111111HHHH-----hhhhhhhh11hhHH
Query WQIaqlhvtavleepkandraHDLV-----dlqllegl11daDL 223
ident
Sbjct GVL-----yftgSDIFnknmrahalekgftineytirplgvgtgvagePL 296
DSSP HHH-----hhh1LHHHHhhhhhhhhhh1lee111lee111111111L

DSSP HHhHHHHHHhhhh111LLLLL11111hhhhhhhh111111111hhhhhhhhhh
Query XPtrSACIAifearaqhPWPPRvatlphwpliyagalegldhlelartvdaaaqavqrfv 283
ident
Sbjct PV--DSEKD-----ifdYIQWK----- 311
DSSP LL--LLHHH-----hhhLLLL-----

DSSP hhhh1111
Query aridratkr 292
ident

```

Sbjct ---111111  
DSSP ---111111

No 155: Query=mol1A Sbjct=4mffa Z-score=6.9

[back to top](#)

DSSP -----  
Query ----- 0  
ident  
Sbjct lnggitdmltelanfeknvsqaihknayrkaasviakypkiksgaeakklpgvgtkia 60  
DSSP 11hhhhhhhhhhhhhhhh1111hhhhhhhhhhhhhh111111hhhh111111hhhh

DSSP -----1111111111hhh  
Query -----aapyspsptnlrs 13  
ident  
Sbjct ekideflatgklrklekirkddtssinfltrvsgigpsaarkfvddegiktledlrkned 120  
DSSP hhhhhhhhh111hhhhhhhh11hhhhhhhh111111hhhhhhhh1111hhhh11hh

DSSP hhhhhhhhhhh1111hHHHHHHHHHHHHHHHHHH-LLLL11LLLEEEHHHHHHHHhh111  
Query lrdr1tqaerqgvvFRLQRHVAVIVVAQFAA-TLTDdtGAPLLLVKGGSSLELrrgip 72  
ident | |  
Sbjct klnhhqriglkyfgdfEKRIPREEMLMQMDIVLnEVKKvdSEYIATVCGSFRRGA----- 175  
DSSP h11hhhhhhhh111hhHLEEEHHHHHHHHHHHHHHHHHh11LLLEEEELHHHHHLL-----

DSSP 1111LLLEEEEL-----1LHHHHHHHHHHHHhh1111eeEEELLEEL11111L  
Query dsrTSKDFATVAR-----rDIELIHEQLADAGetwegftAIFTAPEElaapgxvV 123  
ident | | | | |  
Sbjct --eSSGDMDVLLThpsftsespkLLHQVVEQLQKVH-----FITDTLSKG-----E 219  
DSSP --1EELLEEEEEE1111111111LLHHHHHHHHHLL-----LEEEEEEEL-----L

DSSP LLEEEEEEEEL-LEEEEEEEEEEEL-LLLL1111eeeeelhhhh111111eeeeelh  
Query KPRRFTAKLSYR-GRAFATVPIEVSSV-EAGNadqfdt1tsdalglvgvpaavavpcxti 181  
ident | | | | |  
Sbjct TKFMGVCQLPSKdEKEYPHRRIDIRLIpKDQY-----y 252  
DSSP LEEEEELLLL1111111111LEEEEEEEL1HHHH-----h

DSSP HHHHhhhhhhhh111111111111HHHHHHHH-----hhhh11hHH  
Query PWQIaqklhavtavleekandraHDLVDLQ-----lleg11ldAD 222  
ident | | | | |  
Sbjct CGVL-----yftgSDIFNKNmrahalekgftineytirplgvgtgvagEP 296  
DSSP HHHH-----h111LHHHHHHHHhhhhhh11eeel111eeel1111111L

DSSP HHhhHHHHHHhhhh111111111111hhhhhhhh1111111111hhhhhhhhhh  
Query LXptRSACIAifearaqhpWPPRVat1phwplyagalegldhlelartvdaaaqavqrf 282  
ident | | | | |  
Sbjct LP--VDSEKD-----ifdYIQWK----- 312  
DSSP LL--LLLHHH-----hhhLLLL-----

DSSP hhhhhh1111  
Query varidratkr 292  
ident  
Sbjct -yrepkdrse 321  
DSSP -111hhh111

No 156: Query=mol1A Sbjct=4m9gA Z-score=6.9

[back to top](#)

DSSP -----  
Query ----- 0  
ident  
Sbjct lnggitdmltelanfeknvsqaihknayrkaasviakypkiksgaeakklpgvgtkia 60  
DSSP 11hhhhhhhhhhhhhhhh1111hhhhhhhhhhhhhh111111hhhh111111hhhh

DSSP -----1111111111hhh

```

ident
Sbjct ekideflatgklrklekirqddtssinfltrvsgigpsaarkfvddegiktledlrkned 120
DSSP hhhhhhhhh111hhhhhhhh1hhhhhhhh111111hhhhhhhh1111hhhh11hh

DSSP hhhhhhhhh1111hhHHHHHHHHHHHHHLL-LLLL1LLLLLEEEHHHHHHhh111
Query lrdrltqvaerqgvfgrlQRHVAXIVVAQFAAT-LTDDtGAPLLLVKGGSSLELrrgip 72
ident
Sbjct klnhhqriglkyfgdfeKRIPREEMLMQMDIVLNeVKKVdSEYIATVCGSFRRGA----- 175
DSSP h11hhhhhhhh1hhhh1LLEEHHHHHHHHHHHHHHHHH1LLEEELHHHHLLL-----

DSSP 111LLLLLEEEEL-----1LHHHHHHHHHHHHhh111leeEEELLEEL11111LLE
Query dsrTSKDFATVAR-----rDIELIHEQLADAGetgwegftAIFTAPEEiaapgxVKPR 126
ident
Sbjct --eSSGDMVLLThpsfstsLLHQVVEQLQKVH-----FITDTLSKG-----ETKF 219
DSSP --1EELLEEEEEE111111HHHHHHHHHHHLL-----LEEEEEEEL-----LLEE

DSSP EEEEEEE11eEEEEEEEEEL-LLLL1111eeeee1hhhh11111eeeee1hHHHH
Query RFTAKLSYrgrAFATVPIEVSSV-EAGNadqfdtltsdalglvgvpaavavpcxtiPWQI 185
ident
Sbjct MGVCQLPS---EYPHRRIDIRLIpKDQY-----yCGVL 249
DSSP EEEELLLL---LLEELEEEL1HHHH-----hHHHH

DSSP hhhhhhh1111111111hhhhHHHHHH-----h111hhhh
Query aqklhavtavleepkandrahdldVLDLQLE-----g111dadl 223
ident
Sbjct -----yftgSDIFNKnmrahalekgftinkytirplgvgtvagep 289
DSSP -----h11LHHHHHHhhhhhhhh1lee1111ee1111111111

DSSP hhhHHHHhhhhhh1111L1111111hhhhhhhh1111111111hhhhhhhhhh
Query xpTrSACIaifearaqhpWPPRVatlphwpliyagalegldhlelartvdaaaqavqrfv 283
ident
Sbjct lpvdSEKD-----ifdYIQWK----- 305
DSSP 1111LHHH-----h11HLLL-----

DSSP hhhhh1111
Query aridratkr 292
ident
Sbjct yrepkdrse 314
DSSP 111hhhh111

```

No 157: Query=mol1A Sbjct=5j2jA Z-score=6.9

[back to top](#)

```

DSSP ----- 0
Query -----
ident
Sbjct tlnggitdmltelanfekvnvsqaihkynayrkaasviakyphkiksgaeakklpgvgtki 60
DSSP 111hhhhhhhhhhhhhh111hhhhhhhhhhhhhh111111hhhh11111hh

DSSP -----111111111hh
Query -----aapyspntlr 12
ident
Sbjct aekideflatgklrklekirqddtssinfltrvsgigpsaarkfvddegiktledlrkne 120
DSSP hhhhhhhhh111hhhhhh11hhhhhhhh111111hhhhhhhh1111hhhh11h

DSSP hhhhhhhhh1111hhhhHHHHHHHHHHH-LLLL11LLLLLEEEHHHHHHhh111
Query slrdrltqvaerqgvfgrlqRHXIVVAQFAA-TLTDdtGAPLLLVKGGSSLELrri 71
ident
Sbjct dklnhhqriglkyfgdfekriPREEMLMQMDIVLNeVKKVdSEYIATVCGSFRRGA---- 176
DSSP h11hhhhhhhh111hh11eHHHHHHHHHHHHHHHHH1LLEEELHHHHLLL-----

DSSP 1111LLLLLEEEEL-----1LHHHHHHHHHHHHhh111leeEEELLEEL1111
Query pdsrTSKDFATVAR-----rDIELIHEQLADAGetgwegftAIFTAPEEiaap 119
ident
Sbjct ---eSSGDMVLLThpsfstsKqpkLLHQVVEQLQKVH-----FITDTLSK---- 221
DSSP ---1EELLEEEEEE111111111111HHHHHHHHHHHLL-----LEEEEEE-----

```

DSSP 111LLEEEEEEEEEEL--LEEEEEEEEEEEEL-LLLL1111eeeee1hhh11111lee  
Query gxpVKPRRFTAKLSYR--GRAFATVPIEVSSV-EAGNadqfdtlttsdalglvgvpaavav 176  
ident | |  
Sbjct --gETKFMGVCQLPSKndEKEYPHRRIDIRLIpKDQY----- 256  
DSSP --1LLEEEEEELLLL11LLEEEEEEEEEEL1HHHH-----

DSSP eellHHHHhhhhhhhh1111111111HHHH-----hhhhhhh  
Query pcxtiPWQIaqk1havtavleekandraHDLV-----dlqllegl 217  
ident |  
Sbjct ----yCGVL-----yftgSDIFnknmrahalekgftineytirplgvtg 296  
DSSP ----hHHHH-----hhl1LHHHHhhhhhhhhhhleeell11lee1111

DSSP 11hHHHHhhHHHHhhhhhh111LLELLL11111hhhhhhhh1111111111hhhh  
Query 1ldADLXPTrSACIaifearaqhPWPPRVat1phwpliYagaleglDhlelartvdaaaq 277  
ident |  
Sbjct vagEPLPV--DSEK----difdYIQWKY----- 318  
DSSP 111LLELL--LLHH----hhhhLLELLL-----

DSSP hhhhhhhhh1111  
Query avqrfvaridratkr 292  
ident  
Sbjct -----repkdrse 326  
DSSP -----11hh111

No 158: Query=mol1A Sbjct=5bolA Z-score=6.9

[back to top](#)

DSSP -----  
Query ----- 0  
ident  
Sbjct tlnggitdmltelanfeknvsqaihkynayrkaasviakyphkiksgaeakklpgvgtki 60  
DSSP 111hhhhhhhhhhhhhh1111hhhhhhhhhhhhhhhh111111hhhh11111hh

DSSP -----111111111hh  
Query -----aapyspntlr 12  
ident  
Sbjct aekideflatgklrklekirddtssinflttrvsgigpsaarkfvdegiktledlrkne 120  
DSSP hhhhhhhhh111hhhhhhhh1hhhhhhhh111111hhhhhhhh1111hhhhhh1h

DSSP hhhhhhhhhhh1111hhhhHHHHHHHHHHHH--LLELLLLEEEHHHHHHhh11  
Query slrdrltqvaerqgvfgrlqRHXIVVAQFAA-TLDDTGAPLLLVKGGSSLElrgi 71  
ident | |  
Sbjct dklnhqriglkyfgdfekriPREEMLQMQDIVLnEVKKVDSEYIATVCGSFRGA---- 176  
DSSP hhl1hhhhhh11hhhh111eEHHHHHHHHHHHHHHHHHHLLLEEEELHHHHLL--

DSSP 111LLEEEEEEL-----1LHHHHHHHHHHHHhh1111eeEELLEE1111  
Query pdsRTSKDFATVAR-----rDIELIHEQLADAGetgwegftAIFTAPEEiaap 119  
ident | | | | |  
Sbjct --ESSGDMDVLLThpsftsestqpkLLHQVVEQLQKVH-----FITDTLSK---- 221  
DSSP ---LEELLEEEEE111111111111HHHHHHHHHHLL-----LEEEEEEE----

DSSP 111LLEEEEEEEEEEL--LEEEEEEEEEEEEL-LLLL1111eeeee1hhh11111lee  
Query gxpVKPRRFTAKLSYR--GRAFATVPIEVSSV-EAGNadqfdtlttsdalglvgvpaavav 176  
ident | |  
Sbjct --gETKFMGVCQLPSKndEKEYPHRRIDIRLIpKDQY----- 256  
DSSP --1LLEEEEEELLLL11LLEEEEEEEEEEL1HHHH-----

DSSP eellHHHH--hhHHHH--HLLL11111111hhhhhhhhhh11hhHHHHhHHHH  
Query pcxtiPWQI--aaQLHAV-TAVLeekandrahdld1qllegl11daLXPTrSACIa 232  
ident |  
Sbjct ----yCGVLyftgSDIFNKnMRAH--alekgftineytirplgvtvagePLPV--DSEK- 307  
DSSP ----hHHHHhh11HHHHhHHHH--hhl1lee1111ee1111111111LL--LLHH--

DSSP hhhhh111LLELLL11111hhhhhhhh1111111111hhhhhhhhhhhhhh1111  
Query ifearaqhPWPPRVat1phwpliYagaleglDhlelartvdaaaqavqrfvaridratkr 292





```

-----
Query -----aapyspptnlrsl 14
ident
Sbjct kideflatgklrklekirqddtsssinfltrvsgigpsaarkfvdegiktledlrknedk 120
DSSP hhhhhhhhh111hhhhhhhh1hhhhhhhh111111hhhhhhhh1111hhhhhh1hh

DSSP hhhhhhhhh111hHHHHHHHHHHHHHHHHH-LLLL11LLLEEEHHHHHHhh1111
Query rdr1tqvaerqgvvfGRLQRHVAXIVVAQFAA-TLTDdtGAPLLLKGGSSLELrrgipd 73
ident | |
Sbjct lnhhqriglkyfgdfEKRIPREEMLQMQDIVLnEVKKvdSEYIATVCGSFRRGA----- 174
DSSP 11hhhhhhhh1hhhhHLEEEHHHHHHHHHHHHHHHHH11LLEEEELHHHHLL-----

DSSP 11LLLEEEEEEEL-----1LHHHHHHHHHHHHhh1111eeEEELLEEL11111
Query srTSKDFATVAR-----rDIELIHEQLADAGetgwegftAIFTAPEE Iaapgx 121
ident | | | |
Sbjct -eSSGMDVLLThpsftsestkqpkLLHQVVEQLQKVH-----FITDTLSKG----- 220
DSSP -1EELEEEEEE111111111111HHHHHHHHHHHLL-----LEEEEEEEL-----

DSSP 1LLLEEEEEEEL--LEEEEEEEL-LLLL1111eeeeelhhhh11111eeeee
Query pVKPRRFTAKLSYR--GRAFATVPIEVSSV-EAGNadqfdt1tsdalglvgvpaavavpc 178
ident | |
Sbjct -ETKFMGVCQLPSKndEKEYPHRRIDIRLlpKDQY----- 254
DSSP -LLEEEEEEELLLL11LLLEEEEEEEL1HHHH-----

DSSP 11hHHHHhhhhhh1111111111HHHHHHH-----hhhh11
Query xtiPWQIaqlhavlavleekandraHDLVDLQ-----llegl11 219
ident |
Sbjct --yCGVL-----yftgSDIFNKNmrahalekgftineytirplgvgtva 296
DSSP --hHHHH-----hhh1LHHHHHHhhhhhh11lee111lee111111

DSSP hHHHHhhHHHHhhhh1111LLLLL1111hhhhhhhh11111111hhhhhhhh
Query dADLXptRSACIaifearaqhpWPPRVAtlphwpliyagalegldh1elartvdaaaqav 279
ident |
Sbjct gEPLP--VDSEK-----difDYIQWK----- 315
DSSP 1LLL--LLLH-----hhHLLLL-----

DSSP hhhhhhhhh1111
Query qrfvaridratkr 292
ident
Sbjct ----yrepkdrse 324
DSSP ----111hhhh111

```

No 161: Query=mol1A Sbjct=4f5pA Z-score=6.9

[back to top](#)

```

DSSP -----
Query ----- 0
ident
Sbjct pqetlnggitdmltelanfeknvsqaihknayrkaasviakypkiksgaeakklpgvg 60
DSSP 11hhhhhhhhhhhhhhhhhh1111hhhhhhhhhhhhhh111111hhhh111111

DSSP -----11111111
Query -----aapysppt 9
ident
Sbjct tkiaekideflatgklrklekirqddtsssinfltrvsgigpsaarkfvdegiktledlr 120
DSSP hhhhhhhhhhh111hhhhhhhh1hhhhhhhh111111hhhhhhhh1111hhhh

DSSP 1hhhhhhhhhhhh1111hHHHHHHHHHHHHHHHLL-LLLLLLLLLEEEHHHHHHHH
Query nlrslrdr1tqvaerqgvvfGRLQRHVAXIVVAQFAAT-LTDDTGAPLLLKGGSSLELr 68
ident | |
Sbjct knedklnhhqriglkyfgdfEKRIPREEMLQMQDIVLNeVKKVDSEYIATVCGSFRRGA- 179
DSSP 11hhh11hhhhhhhh1hhhhHLEEEHHHHHHHHHHHHHHHLLLEEEELHHHHLL-

DSSP h111111LLLEEEEEEEL-----1LHHHHHHHHHHHHhh1111eeEEELLEEL111
Query rgipdsrTSKDFATVAR-----rDIELIHEQLADAGetgwegftAIFTAPEE Iaap 119
ident | | | |
Sbjct -----eSSGMDVLLThpsftsespKLLHQVVEQLQKVH-----FITDTLSKG--- 222

```



Query |
ident |
Sbjct vagEPLP--VDSEK-----difDYIQW----- 316
DSSP 111LLLL--LLLH-----hhhHLLL-----

DSSP hhhhhhhhhhh1111
Query avqrfvaridratkr 292
ident
Sbjct ----kyrepkdrse 326
DSSP ----1111hhh111

No 163: Query=mol1A Sbjct=4wseA Z-score=6.8

[back to top](#)

DSSP -----11111111hHHHHhhhhhhhh1111hhhhHHHHH
Query -----aapyspntnRSLRdrltqvaerqgvfgrlqRHVax 38
ident
Sbjct ekyqtyyttneyqivkeklpdiiirdaeikasevLEPT-----iyekRAIM- 45
DSSP 1lee11111hhhhhhhhhhhhhhhhhhhhhhhhL-----hhhHHHH-

DSSP hHHHHHHHLL1111111EEEEHHHHHHHHHLL---LLLLL-----1LEEEEE111hhh
Query ivVAQFAATLtdtdtgap1LLVKGSSLELRRG---IPDSRT----sKDFATVArddieI 91
ident
Sbjct eVIKDFIRDH-----qRKVYGGTALNEALKqvnPKDAIYdnysfSDIEFYS-----pT 93
DSSP hHHHHHHHH-----1LEEEHHHHHHHHHHhh1HHHLLL11111LEEEEE-----1L

DSSP HHHHHHHHHLL---11eeEEELLEEL1111111EEEEEEEe11eEEEEEEEEEEe
Query HEQLADAGETG---wegftaIFTAPEEiaapgxpkpRRFTAkLsyrgrAFATVPIEVs 148
ident
Sbjct PVQDLVLDLCNI1yrkgykfvQGKDAQHE-----ETYSIFV----NFQLYCDITyS 139
DSSP HHHHHHHHHHHhh1111111EEELLLL-----LEEEEL-----LLEEEEEEEEL

DSSP 1111LLLL-EEEEelhhh11111eEEEELHHHHHHHHHHHHLLL11111LLL-H
Query veagnADQF-DLTSdalglvgvpaavAVPCXTIPWQIAQKLHAVTAVLeepkaNDRA-H 206
ident
Sbjct ptrvfyGIktIEID-----GINYDTPHFMLIDYLRMVNQPL--taaGQRWeK 184
DSSP 1hhhhHLLLeEEEL-----LEEEELHHHHHHHHHHHLLLHH--hhhHHHHhH

DSSP HHHHHHHHHH-HLLHH-----
Query DLVDLQLLEG-LLLDA----- 221
ident
Sbjct AFERMYRLLKdYPIEDfdkrldipeppeeiqsysisrikteflsdnklnesflisgieayn 244
DSSP HHHHHHHHHHhLLLLL1111111111hhhhhhhhhhhh1111111111eeehhhhhh

DSSP -----
Query ----- 221
ident
Sbjct fyirhaassvnlnnfianvpfselisvnyredvknntynflrmivedkekisvdeyfplfq 304
DSSP hhhhh1111111111111111111111111111111111111111111111111111111111

DSSP -----hhhhhhhhhhhhHLLL-----LLL11111hhhhhhhh11
Query -----dlxptrsaciaifeaRAQHP-----WPPRvatlphwplyagalegl 263
ident
Sbjct ftgystvikyddpiiriieyegdGYCIPNvktvktvkvSfQY-----vlmily 352
DSSP 111leeeeee111leeeeee111LLEEEe11111111eLHHH-----hhhhh

DSSP 1111111hhhhhhhhhhHHHLLL-----
Query dhlelartvdaaavqrfvaRIDRATK----- 291
ident
Sbjct inkfrahldknkpmfyngiaISNLVKAarniyldqtkgsvldntvfkfrtnctgntisf 412
DSSP hhhhhhh111hhhhhhhhHHHHHHHHHHHH11111111111111111111111111111111111111

DSSP -----
Query ----- 291
ident
Sbjct trmnr1r1lekrkqgktsfvytpedffkkdletqakldpskarfkntsgnkimvpyll 472
DSSP hhhhhhhhhhh1111111ee1hhhh111hhhh111111111111111111111111111111111



```

DSSP 111hhhhhhhhhhhhhhhh111hhhhhhhhhhhhhhhh1111111hhhh11111hhhh
DSSP -----111111111hh
Query -----aapyspntlr 12
ident
Sbjct aekideflatgklrklekirqddtssinfltrvsgigpsaarkfvdegiktledlrkne 120
DSSP hhhhhhhhhhh111hhhhhhhhhhhhhhhh1111111hhhhhhhhhh11111hhhh11h

DSSP hhhhhhhhhhh1111hhhhHHHHHHHHHHHHH-LLLL11LLLLEEEEHHHHHHHHhh11
Query slrdrltqvaerqgvfgrlqRHVAXIVVAQFAA-TLTDdtGAPLLLVKGGSSLELrgi 71
ident | |
Sbjct dklnhhqriglkyfgdfekriPREEMLQMqDIVLnEVKkvdSEYIATVCGSFRRGA---- 176
DSSP hhh1hhhhhhhh111hhhh11eHHHHHHHHHHHHHHHHHH11LLEEEELHHHHLLL----

DSSP 1111LLLLEEEEEL-----1LHHHHHHHHHHHHhh1111eeEELLEE1111
Query pdsrTSKDFATVAR-----rDIELIHEQLADAGetgwegftAIFTAPEEiaap 119
ident | | | |
Sbjct ---eSSGDMdVLLThpsftsestkpqkLLHQVVEQLQKVH-----FITDTLSK---- 221
DSSP ---1EELLEEEL1111111111111111HHHHHHHHHHHLL-----LEEEEEE----

DSSP 1111LLLLEEEEEL--LEEEEEEEEEEL-LLLL1111eeeee1hhhh11111lee
Query gxpVKPRRFTAKLSYR--GRAFATVPIEVSSV-EAGNadqfdtlttsdalglvgvpaav 176
ident | |
Sbjct --gETKFMGVCQLPSKndEKEYPHRRIDIRLIpKDQY----- 256
DSSP --1LLEEEELLLL1111111111111111LLEEEEL1HHHH-----

DSSP ee11hHHHHhhhhhhhh1111111111111111HHHH-----hhhhhhhh
Query pcxtiPWQIaqlhavlavleekandraHDLV-----dlqllegl 217
ident |
Sbjct ---yCGVL-----yftgSDIFnknmrahalekgftineytirplgvtg 296
DSSP ---hHHHH-----hhh1LHHHHhhhhhhhhhh11ee1111ee11111

DSSP 11hHHHHhhHHHHhhhhhh1111111111111111hhhhhhhh1111111111hhhhhh
Query 1ldADLXPTrSACIaifearaqhPWPPRVat1phwpliyagaleglhdh1elartvdaaaq 277
ident |
Sbjct vagEPLPV--DSEK----difdYIQWKY----- 318
DSSP 11111111--LLHH----hhhh11111111-----

DSSP hhhhhhhhhhh1111
Query avqrfvaridratkr 292
ident
Sbjct -----repkdrse 326
DSSP -----11hhhh111

```

No 166: Query=mol1A Sbjct=5j2eA Z-score=6.8

[back to top](#)

```

DSSP -----
Query ----- 0
ident
Sbjct tlnggitdmltelanfeknvsqaihknayrkaasviakyphkiksgaeakklpgvgtki 60
DSSP 111hhhhhhhhhhhhhhhh111hhhhhhhhhhhhhhhh1111111hhhh11111hhhh

DSSP -----111111111hh
Query -----aapyspntlr 12
ident
Sbjct aekideflatgklrklekirqddtssinfltrvsgigpsaarkfvdegiktledlrkne 120
DSSP hhhhhhhhhhh111hhhhhhhhhhhhhhhh1111111hhhhhhhhhh11111hhhh11h

DSSP hhhhhhhhhhh1111hhhhHHHHHHHHHHHHH-LLLL11LLLLEEEEHHHHHHHHhh11
Query slrdrltqvaerqgvfgrlqRHVAXIVVAQFAA-TLTDdtGAPLLLVKGGSSLELrgi 71
ident | |
Sbjct dklnhhqriglkyfgdfekriPREEMLQMqDIVLnEVKkvdSEYIATVCGSFRRGA---- 176
DSSP hhh1hhhhhhhh11hhhh11eHHHHHHHHHHHHHHHHHH11LLEEEELHHHHLLL----

```



```

DSSP 11hHHHHHHhHHHHhhhhhh111LLLLL11111hhhhhhhh111111111hhhhhh
Query 1ldADLXPtrSACIaifearaqhPWPPRVatlphwpliayagaldhlelartvdaaaq 277
ident |
Sbjct vagEPLPV--DSEK----difdYIQWKY----- 318
DSSP 111LLLLL--LLHH----hhhhLLLLL-----

```

```

DSSP hhhhhhhhhhh1111
Query avqrfvaridratkr 292
ident |
Sbjct -----repkdrse 326
DSSP -----11hhhh111

```

No 168: Query=mol1A Sbjct=5j2kA Z-score=6.8

[back to top](#)

```

DSSP -----
Query ----- 0
ident |
Sbjct tlnggitdmltelanfeknvsqaihkynayrkaasviakyphkiksgaeakklpgvgtki 60
DSSP 111hhhhhhhhhhhhhh111hhhhhhhhhhhhhh1111111hhhh11111hhhh

```

```

DSSP -----111111111hh
Query -----aapyspntlr 12
ident |
Sbjct aekideflatgklrklekirqddtssinfltrvsgigpsaarkfvdegiktledlrkne 120
DSSP hhhhhhhhhhh111hhhhhhhh1hhhhhhhhhh1111111hhhhhhhh1111hhhhhhhh

```

```

DSSP hhhhhhhhhhh1111hhhhHHHHHHHHHHHH--LLLL111LLEEEHHHHHHHHhh11
Query slrdrltqvaerqgvfgrlqRHVAXIVVAQFAA-TLTDdtGAPLLLKVGGSSELErgi 71
ident |
Sbjct dklnhhqriglkyfgdfekriPREEMLQMQRDIVLnEVKKvdSEYIATVCGSFRRGA---- 176
DSSP hh11hhhhhhhh111hhhh11eHHHHHHHHHHHHHHHHHH11LLEEEELHHHHLLL----

```

```

DSSP 1111LLEEEEEEEL-----1LHHHHHHHHHHHHhh1111eeEELLEEE1111
Query pdsrTSKDFATVAR-----rDIELIHEQLADAGetgwegftAIFTAPEEiaap 119
ident | |
Sbjct ---eSSGDMDVLLThpsftsestqkqkLLHQVVEQLQKVH-----FITDTLSK---- 221
DSSP ---1EELLEEEEEE111111111111HHHHHHHHHHHLL-----LEEEEEE----

```

```

DSSP 111LLEEEEEEEL--LEEEEEEEL--LLLL1111eeeee1hhhh11111eee
Query gxpVKPRRFTAKLSYR--GRAFATVPIEVSSV-EAGNadqfdtltsdalglvgvpaavav 176
ident |
Sbjct --gETKFMGVCQLPSKndEKEYPHRRIDIRLlpKDQY----- 256
DSSP --1LLEEEEEE111111111111LLEEEEEEEL1HHHH-----

```

```

DSSP eellHHHHhhhhhh1111111111HHHH-----hhhhhhhh
Query pcxtiPWQIaqklhavtavleepkandraHDLV-----dlqllegl 217
ident |
Sbjct ---yCGVL-----yftgSDIFnknmrahalekgftineytirplgvtg 296
DSSP ---hHHHH-----hhhlHHHHhhhhhhhhhh11ee1111ee1111

```

```

DSSP 11hHHHHHHhHHHHhhhhhh111LLLLL11111hhhhhhhh111111111hhhhhh
Query 1ldADLXPtrSACIaifearaqhPWPPRVatlphwpliayagaldhlelartvdaaaq 277
ident |
Sbjct vagEPLPV--DSEK----difdYIQWKY----- 318
DSSP 111LLLLL--LLHH----hhhhLLLLL-----

```

```

DSSP hhhhhhhhhhh1111
Query avqrfvaridratkr 292
ident |
Sbjct -----repkdrse 326
DSSP -----11hhhh111

```



[back to top](#)

DSSP -----  
Query ----- 0  
ident -----  
Sbjct tlnggitdmltelanfeknvsqaihkynayrkaasviakyphkiksgaeakklpgvgtki 60  
DSSP 111hhhhhhhhhhhhhhhh111hhhhhhhhhhhhhhhh111111hhhhhh11111hhh

DSSP -----111111111hh  
Query -----aapyspntlr 12  
ident -----  
Sbjct aekideflatgklrklekirqddtsssinfltrvsgigpsaarkfvdegiktlelkrne 120  
DSSP hhhhhhhhh111hhhhhhhhhhhhhhhh111111hhhhhhhhhh1111hhhhhhhh

DSSP hhhhhhhhhhh1111hhhhHHHHHHHHHHHHHHHHHH-LLLL111LLEEEHHHHHHHHhh11  
Query slrdrltqvaerqgvfgrlqRHVAXIVVAQFAA-TLTDdtGAPLLLVKGGSSLELrrgi 71  
ident | |  
Sbjct dklhhqriglkyfgdfekriPREEMLQMQUIVnEVKKvdSEYIATVCGSFRRGA---- 176  
DSSP hhl1hhhhhhhh1h1hh11leEHHHHHHHHHHHHHHHHHH1LLEEEEEELLLLLL----

DSSP 1111LLEEEEEEEL-----1LHHHHHHHHHHHHHHHH1111leeEEELLLEEL111  
Query pdsrTSKDFATVAR-----rDIELIHEQLADAGetgwegftAIFTAPEEYaap 119  
ident | |  
Sbjct ---eSSGDMVLLThpsftsestqpkLLHQVVEQLQKVH-----FITDTLSKG--- 222  
DSSP ---lEELEEEEEE111111111111HHHHHHHHHHHLL-----LEEEEEEEL---

DSSP 111LLEEEEEEEL--LEEEEEEEL-LLLL1111eeee1hhhh11111ee  
Query gxpVKKPRFTAKLSYR--GRAFATVPIEVSSV-EAGNadqfdtlttsdalglvgsaavav 176  
ident | |  
Sbjct ---ETKFMGVCQLPSKndEKEYPHRRIDIRLlpKDQY----- 256  
DSSP ---LLEEEEEEELLLL111LLEEEEEEEL1HHHH-----

DSSP eel1hHHHHhhhhhhhh1111111111HHHHHHH-----hHHHH  
Query pcxtiPWQIaqkIhavtavleekandraHDLVLDLQ-----llegl 217  
ident | |  
Sbjct ---yCGVL-----yftgSDIFNKNmrahailekgftineytirplvgtg 296  
DSSP ---hHHHH-----hhl1LHHHHHHHHHHHHhh1lee111ee11111

DSSP 1hhHHHHhhHHHHhhhhhh1111LLLLL11111hhhhhhhh111111111hhhhhh  
Query 1ldADLXptRSACIaifearaqhpWPPRVat1phwpliYagalegldhlelartvdaaaq 277  
ident | |  
Sbjct vagEPLP--VDSEK-----difDYIQW----- 316  
DSSP 111LLL--LLLH-----hhHHLLL-----

DSSP hhhhhhhhh1111  
Query avqrfvaridrskr 292  
ident  
Sbjct ----kyrepkrse 326  
DSSP ----1111hh111

[back to top](#)

DSSP -----  
Query ----- 0  
ident -----  
Sbjct tlnggitdmltelanfeknvsqaihkynayrkaasviakyphkiksgaeakklpgvgtki 60  
DSSP 111hhhhhhhhhhhhhhhh111hhhhhhhhhhhhhhhh111111hhhhhh11111hhh

DSSP -----111111111hh  
Query -----aapyspntlr 12  
ident -----  
Sbjct aekideflatgklrklekirqddtsssinfltrvsgigpsaarkfvdegiktlelkrne 120  
DSSP hhhhhhhhh111hhhhhhhhhhhhhhhh111111hhhhhhhhhh1111hhhhhhhh

```

DSSP hhhhhhhhhhh1111hhhhHHHHHHHHHHHHH-LLLL11LLLLEEEHHHHHHhh11
Query slrdrltqvaerqgvfgrlqRHVAXIVVAQFAA-TLTDdtGAPLLLVKGGSSLELrrgi 71
ident
Sbjct dklnhhqriglkyfgdfekriPREEMLMQDIVLnEVKKvdSEYIATVCGSFRRGA---- 176
DSSP hhl1hhhhhhhh1hhhh1leEHHHHHHHHHHHHHHHHHh1LLEEEELHHHHLLL----

DSSP 1111LLLLEEEEL-----1LHHHHHHHHHHHHhh111leeEEELLEEL111
Query pdsrTSKDFATVAR-----rDIELIHEQLADAGetgwegftAIFTAPEEJaap 119
ident
Sbjct ---eSSGMDVLLThpsftsestkpqkLLHQVVEQLQKVH-----FITDTLSKG--- 222
DSSP ---1EELLEEEEEE11lee1lee1111HHHHHHHHHHLLL-----LEEEEEEEL---

DSSP 1111LLEEEEEEEL--LEEEEEEEL-LLLL111leeeelhhhh1111lee
Query gxpVKPRRFTAKLSYR--GRAFATVPIEVSSV-EAGNadqfdtlttsdalglvgvpaavav 176
ident
Sbjct ---ETKFMGVCQLPSKndEKEYPHRRIEIRLIpKDQY----- 256
DSSP ---LLEEEEEEELLLL1L1L1L1LLEEEEEEEL1HHHH-----

DSSP eel1hHHHHhhhhhh1111111111HHHHHHH-----hhhhh
Query pcxtiPWQIaqlhavtavleepkandraHDLVDLQ-----llegl 217
ident
Sbjct ---yCGVL-----yftgSDIFNKNmrahalekgftineytirplgvtg 296
DSSP ---hHHHH-----hhl1LHHHHHHhhhhhhhhleeel11lee1111

DSSP 11hHHHHhhHHHHhhhhhh1111L1L1L1111hhhhhhhh1111111111hhhhhh
Query 1ldADLXptRSACIaifearaqhpWPPRVatlpwpliyagalegldh1elartvdaaaq 277
ident
Sbjct vagEPLP--VDSEK-----difDYIQW----- 316
DSSP 1111LLL--LLLHH-----hhHLLL-----

DSSP hhhhhhhhhhh1111
Query avqrfvaridratkr 292
ident
Sbjct ----kyrepkdrse 326
DSSP ----1111hh111

```

No 171: Query=mol1A Sbjct=3rjiA Z-score=6.8

[back to top](#)

```

DSSP -----
Query ----- 0
ident
Sbjct tlnggitdmltelanfeknvsqaihkynayrkaasviakyphkiksgaeakklpgvgtki 60
DSSP 111hhhhhhhhhhhhhhhh111hhhhhhhhhhhhhhhh111111hhhh11111hhh

DSSP -----111111111hh
Query -----aapyspntnr 12
ident
Sbjct aekideflatgklrklekirqddtssinfltrvsgigpsaarkfvdegiktledlrkne 120
DSSP hhhhhhhhh111hhhhhhhh1hhhhhhhh111111hhhhhhhh111hhhh11h

DSSP hhhhhhhhhhh1111hhhhHHHHHHHHHHHH-LLLL11LLLLEEEHHHHHHhh11
Query slrdrltqvaerqgvfgrlqRHVAXIVVAQFAA-TLTDdtGAPLLLVKGGSSLELrrgi 71
ident
Sbjct dklnhhqriglkyfgdfekriPREEMLMQDIVLnEVKKvdSEYIATVCGSFRRGA---- 176
DSSP hhl1hhhhhhhh1hhhh1leEHHHHHHHHHHHHHHHHHh1LLEEEELHHHHLLL----

DSSP 1111LLLLEEEEL-----1LHHHHHHHHHHHHhh111leeEEELLEEL111
Query pdsrTSKDFATVAR-----rDIELIHEQLADAGetgwegftAIFTAPEEJaap 119
ident
Sbjct ---eSSGMDVLLThpsftsestkpqkLLHQVVEQLQKVH-----FITDTLSKG--- 222
DSSP ---1EELLEEEEEE111111111111HHHHHHHHHHLLL-----LEEEEEEEL---

DSSP 1111LLEEEEEEEL--LEEEEEEEL-LLLL111leeeelhhhh1111lee
Query gxpVKPRRFTAKLSYR--GRAFATVPIEVSSV-EAGNadqfdtlttsdalglvgvpaavav 176
ident

```

```

DSSP  ---LLEEEEEELLLL11LLLLLEEEEEEL1HHHH-----
DSSP  ee11hHHHHhhhhhhhh1111111111HHHHHHH-----hhhhh
Query  pcxtiPWQIaqkIhavtavleepkandraHDLVDLQ-----llegl 217
ident  |
Sbjct  ---yCGVL-----yftgSDIFNKNmrahalekgftineytirplgvtg 296
DSSP  ---hHHHH-----hhh1LHHHHHHhhhhhh1lee1111eee11111

DSSP  11hHHHHhhHHHHhhhh1111LLLLL1111hhhhhhhh1111111111hhhhh
Query  1ldADLXPtRSACIaifearaqhpWPPRVatIphwpliYagaleglDhlelartvdaaaq 277
ident  |
Sbjct  vagEPLPV--DSEK-----difDYIQW----- 316
DSSP  111LLLLL--LLHH-----hhhHLLL-----

DSSP  hhhhhhhhhh1111
Query  avqrfvaridratkr 292
ident
Sbjct  ----kyrepkdrse 326
DSSP  ----1111hh111

```

No 172: Query=mol1A Sbjct=4jwnA Z-score=6.8

[back to top](#)

```

DSSP  -----
Query  ----- 0
ident
Sbjct  tlnggitdmltelanfeknvsqaihynayrkaasviakyphkiksgaeakklpgvgtki 60
DSSP  111hhhhhhhhhhhhhh1111hhhhhhhhhhhhhh11111111hhhhh11111hhhh

DSSP  -----1111111111hh
Query  -----aapysstpnlr 12
ident
Sbjct  aekideflatgklrklekirqddtssinfltrvsgigpsaarkfvdegiktledlrkne 120
DSSP  hhhhhhhhh111hhhhhhhhhhhhhh1111111hhhhhhhhhh1111hhhhh1lh

DSSP  hhhhhhhhh1111hhhhHHHHHHHHHHHH--LLLL11LLLLEEEEHHHHHHhh11
Query  slrdrltqvaerqgvfgrlqRHVAXIVVAQFAA--TLTDdtGAPLLLKGGSSLELrgi 71
ident  |
Sbjct  dklnhhqriglkyfgdfekriPREEMLQMqDIVLnEVKvdSEYIATVCGSFRFGA---- 176
DSSP  hh11hhhhhhhh11hhhh111eEHHHHHHHHHHHHHHHHHH11LLEEEELHHHLL-----

DSSP  1111LLLLEEEEEL-----1LHHHHHHHHHHHHhh1111eeEELLEEL111
Query  pdsrTSKDFATVAR-----rDIEIIEQLADAGetgwegftAIFTAPEEiaap 119
ident  |
Sbjct  ---eSSGDMDVLLThpsftsestqkplLHQVVEQLQKVH-----FITDTLSKG--- 222
DSSP  ---1EELLEEEEE111ee1111HHHHHHHHHHHLL-----LEEEEEEL---

DSSP  1111LLEEEEEEEEL--LEEEEEEEEEEL--LLLL1111eeee1hhhh11111eee
Query  gxpVKPRRFTAKLSYR--GRAFATVPIEVSSV--EAGNadqfdtItdalglvgvpaavav 176
ident  |
Sbjct  ---ETKFMGVCQLPSKndEKEYPHRRIRIAIRLIpKDQY----- 256
DSSP  ---LLEEEEEELLLL11LLLLLEEEEEEL1HHHH-----

DSSP  ee11hHHHHhhhhhhhh1111111111HHHHHHH-----hhhhh
Query  pcxtiPWQIaqkIhavtavleepkandraHDLVDLQ-----llegl 217
ident  |
Sbjct  ---yCGVL-----yftgSDIFNKNmrahalekgftineytirplgvtg 296
DSSP  ---hHHHH-----hhh1LHHHHHHhhhhhh1lee1111eee11111

DSSP  11hHHHHhhHHHHhhhh1111LLLLL1111hhhhhhhh1111111111hhhhh
Query  1ldADLXptRSACIaifearaqhpWPPRVatIphwpliYagaleglDhlelartvdaaaq 277
ident  |
Sbjct  vagEPLPV--VDSEK-----difDYIQW----- 316
DSSP  111LLLLL--LLHH-----hhhHLLL-----

```

```
Query avqrfvaridratkr 292
ident
Sbjct -----kyrepkdrse 326
DSSP -----1111hhhh11
```

No 173: Query=mol1A Sbjct=3rjhA Z-score=6.8

[back to top](#)

```
DSSP -----
Query ----- 0
ident
Sbjct tlnggitdmltelanfekonvsqaihkynayrkaasviakyphkiksgaeakklpgvgtki 60
DSSP 1111hhhhhhhhhhhhhhhhhh1111hhhhhhhhhhhhhhhhhh1111111hhhhhh111111hh
```

```
DSSP -----111111111hh
Query -----aapyspntlr 12
ident
Sbjct aekideflatgkrlrklekirqddtssinfltrvsgigpsaarkfvddegiktledlrkne 120
DSSP hhhhhhhhhhh111hhhhhhhh1hhhhhhhhhh111111hhhhhhhh111111hhhhhh11h
```

```
DSSP hhhhhhhhhhh1111hhhhHHHHHHHHHHHH-LLLL11LLLLEEEEHHHHHHHHhh11
Query slrdrltqvaerqgvfgrlqRHVAXIVVAQFAA-TLTDdtGAPLLLVKGGSSLELrrgi 71
ident
Sbjct dklnhhqriglkyfgdfekriPREEMLQMqDIVLnEVKKvdSEYIATVCGSFRRGA---- 176
DSSP hh11hhhhhhhh1hhhh11eEHHHHHHHHHHHHHHHHHH11LLLEEEELHHHHLL----
```

```
DSSP 1111LLLLEEEEEL-----1LHHHHHHHHHHHHhh111leeEELLLLEEL111
Query pdsrTSKDFATVAR-----rDIELIHEQLADAGetgwegftAIFTAPEEaap 119
ident
Sbjct ---eSSGDMDVLLThpsftsestqpkLLHQVVEQLQKVH-----FITDTLSKG--- 222
DSSP ---1EELLEEEL11lee11ee1111HHHHHHHHHHLL-----LEEEEEEEL---
```

```
DSSP 1111LEEEEEEEL--LEEEEEEEL-LLL1111eeehhhhh1111lee
Query gxpVKPRRFTAKLSYR--GRAFATVPIEVSSV-EAGNadqfdt1tsdalglvgpaavav 176
ident
Sbjct ---ETKFMGVCQLPSKndEKEYPHRRIDIRLlpKDQY----- 256
DSSP ---LEEEEEEELLLL111111LEEEEEEEL1HHHH-----
```

```
DSSP eel1hHHHHhhhhhhhh1111111111HHHHHHH-----hhhhh
Query pcxtiPWQIaqklhavtavleekandraHDLVdLQ-----llegl 217
ident
Sbjct ---yCGVL-----yftgSDIFNKNmrahalekgftineytirplgvgtg 296
DSSP ---hHHHH-----hh1LHHHHHHhhhhhh1lee111lee1111
```

```
DSSP 11hHHHHhhHHHHhhhhhh1111LLLLL1111hhhhhhhh11111111hhhhhh
Query 1ldADLXptRSACIaifearaqhpWPPRVatlphwplyyagalegldh1elartvdaaaq 277
ident
Sbjct vagEPLP--VDSEK-----difDYIQW----- 316
DSSP 111LLL--LLLH-----hhHLLL-----
```

```
DSSP hhhhhhhhh1111
Query avqrfvaridratkr 292
ident
Sbjct -----kyrepkdrse 326
DSSP -----1111hhhh11
```

No 174: Query=mol1A Sbjct=3uxpB Z-score=6.8

[back to top](#)

```
DSSP -----
Query ----- 0
ident
Sbjct etlnggitdmlvelanfekonvsqaihkynayrkaasviakyphkiksgaeakklpgvgtk 60
DSSP 1111hhhhhhhhhhhhhhhhhh1111hhhhhhhhhhhhhhhhhh111111hhhhhh111111hh
```

DSSP -----111111111h  
Query -----aapyspptnl 11  
ident  
Sbjct iaekideflatgklrklekirqddtsssinftrvtgigpsaarklvdegiktledlrkn 120  
DSSP hhhhhhhhhhh111hhhhhh111hhhhhhhh1111111hhhhhhhh111111hhhhhh1

DSSP hhhhhhhhhhh1111hhhhHHHHHHHHHHHHH-LLLL11LLLLEEEHHHHHHhh1  
Query rslrdrltqvaerqgvfgrlqRHVAXIVVAQFAA-TLTDdtGAPLLLKGGSSLELrrg 70  
ident | |  
Sbjct edklnhhqriglkyfedfekriPREEMLQMqDIVLnEVKKIdPEYIATVCGSFRRGA--- 177  
DSSP hhh11hhhhhhhh11hhhh1leEHHHHHHHHHHHHHHHHHH1LLLLEEEELLLLLL---

DSSP 1111LLLLEEEEL-----1LHHHHHHHHHHHHhh1111eeEEELLEEL11  
Query ipdsrTSKDFATVAR-----rDIELIHEQLADAGetgwegftAIFTAPEEIaa 118  
ident | | | |  
Sbjct ---eSSGDMDVLLThpnftsesskqpkLLHRVVEQLQKVR-----FITDTLSKG-- 223  
DSSP ---1EELLLLLEEEEL1111111111hhHHHHHHHHHLL-----LEEEEEEEL--

DSSP 1111LLLLEEEEEEEL--LEEEEEEEL-LLLL1111eeee1hhhh1111lee  
Query pgxpVKPRRFTAKLSYR--GRAFATVPIEVSSV-EAGNadqfdtlttsdalglvgpaava 175  
ident | |  
Sbjct ---ETKFMGVCQLPSEndENEYPHRRIDIRLQpKDQY----- 257  
DSSP ---LLEEEEEEELLLL11LLLLEEEEEEELLLLH-----

DSSP ee11hHHHHhhhhhh1111111111HHHHHHH-----hhh  
Query vpcxtiPWQIaqlhavlavlepkandraHDLVDLQ-----lleg 216  
ident |  
Sbjct ----yCGVL-----yftgSDIFNKNmrahalekgftineytirplgvt 296  
DSSP ----hHHHH-----hhh1LHHHHHHhhhh1111lee111lee1111

DSSP h11hHHHHhhHHHHhhhhhh1111LLL11111hhhhhhhh111111111hhhh  
Query 111dADLXptRSACIaifearaqhpWPPRVatlpwpliayagalegldhlelartvdaaa 276  
ident |  
Sbjct gvagEPLP--VDSEQ-----difDYIQW----- 317  
DSSP 1111LLL--LLLH-----hhhHLLL-----

DSSP hhhhhhhhhhh1111  
Query qavqrfvaridratkr 292  
ident  
Sbjct -----ryrepkdrs 326  
DSSP -----1111hhhh1

No 175: Query=mol1A Sbjct=3jppqA Z-score=6.8

[back to top](#)

DSSP -----  
Query ----- 0  
ident  
Sbjct tlnggitdmltelanfeknvsqaihkynayrkaasviakyphkiksgaeakklpgvgtki 60  
DSSP 111hhhhhhhhhhhhhh1111hhhhhhhhhhhhhh111111hhhh11111hhhh

DSSP -----111111111hh  
Query -----aapyspptnlr 12  
ident  
Sbjct aekideflatgklrklekirqddtsssinftrvsgigpsaarkfvdegiktledlrkne 120  
DSSP hhhhhhhhh111hhhhhhhh1hhhhhhhh1111111hhhhhhhh11111hhhhhh1h

DSSP hhhhhhhhhhh1111hhhhHHHHHHHHHHHHH-LLLL11LLLLEEEHHHHHHhh11  
Query slrdrltqvaerqgvfgrlqRHVAXIVVAQFAA-TLTDdtGAPLLLKGGSSLELrrgi 71  
ident | |  
Sbjct dklnhhqriglkyfgdfekriPREEMLQMqDIVLnEVKKvdSEYIATVCGSFRRGA---- 176  
DSSP hh11hhhhhhhh111hhhh1leEHHHHHHHHHHHHHHHHHH1LLLLEEEELHHHLLL---

DSSP 1111LLLLEEEEL-----1LHHHHHHHHHHHHhh1111eeEEELLEEL111  
Query pdsrTSKDFATVAR-----rDIELIHEQLADAGetgwegftAIFTAPEEIiap 119



DSSP -hhllhhhhhhhhHHHHhhhhhhllllLLLLllllllhhhhhhhhhhllllllllllllhh  
Query -gllldadlxptrSACIAifearaqhpWPPRVatlphwpliyagalegldhlelartvda 274  
ident |  
Sbjct gvtgvageplpvdSEKD-----ifdYIQWK----- 317  
DSSP lllllllllllllLHHH-----hhhHLLL-----

DSSP hhhhhhhhhhhhhllll  
Query aaqavqrfvaridratkr 292  
ident  
Sbjct -----yrepkdrse 326  
DSSP -----lllhhhhll

No 177: Query=mol1A Sbjct=9icpA Z-score=6.8

[back to top](#)

DSSP -----  
Query ----- 0  
ident  
Sbjct etlnggitdmltelanfknvsqaihknayrkaasviakypkiksgaeakklpgvgtk 60  
DSSP lllllhhhhhhhhhhhhhhllllhhhhhhhhhhhhhhllllllllhhhhhhllllllhh

DSSP -----llllllllllh  
Query -----aapyspsptnl 11  
ident  
Sbjct iaekideflatgklrklekirqddtssinfltrvsgigpsaarkfvdegiktledlrkn 120  
DSSP hhhhhhhhhhhllllhhhhhhllllhhhhhhhhhhllllllllhhhhhhhhllllllhhhhhhll

DSSP hhhhhhhhhhhhhllllhhhhhhHHHHHHHHHHHHH-LLLLllllLEEEHHHHHHHHhh1  
Query rslrdrltqvaerqgvfgrlqRHVAXIVVAQFAA-TLTDdtGAPLLLKGGSSLELrrg 70  
ident | |  
Sbjct edklnhhqriglkygdfekriPREEMLMQDIVLnEVKKvdSEYIATVCGSFRGA--- 177  
DSSP lllllhhhhhhhhllhhhhllleHHHHHHHHHHHHhhHHHHhhllLEEEELHHHLLL---

DSSP lllllllllLEEEEL-----lLHHHHHHHHHHHHhhllllleEEELLEELll  
Query ipdsrTSKDFATVAR-----rDIELIHEQLADAGetgwegftAIFTAPEEIaa 118  
ident | | | |  
Sbjct ---eSSGDMDVLLThpsftsestkpklLHQVVEQLQKVH-----FITDTLSKG-- 223  
DSSP ---LEELLEEEEEEllllllllllllhhHHHHHHHHHHHLL-----LEEEEEEEL--

DSSP lllllllLEEEEEEEL--EEEEEEEEEEEL-LLLLllllleeeelhhhhllllllle  
Query pgxpVKPRRFTAKLSYRG--RAFATVPIEVSSV-EAGNadqfdtltsdalglvgvpaava 175  
ident | |  
Sbjct ---ETKFMGVCQLPSKNdeKEYPHRRIDIRLIpKDQY----- 257  
DSSP ---LEEEEEEELLLLllllllLEEEEEEELlHHH-----

DSSP eeellhHHHHhhhhhhhhllllllllllllhhhhHHHHHH-----  
Query vpcxtiPWQIaqklhavlavlepkandrahdldvDLQLE----- 215  
ident  
Sbjct -----yCGVL-----yftgSDIFNKnmrahalekgftineytirp 292  
DSSP -----hHHHH-----hhhllHHHHHHhhhhhhhhllleeeelleee

DSSP -hhllhhhhhhhhHHHHhhhhhhllllLLLLllllllhhhhhhhhhhllllllllllllhh  
Query -gllldadlxptrSACIAifearaqhpWPPRVatlphwpliyagalegldhlelartvda 274  
ident  
Sbjct lgvtgvageplpvdSEKD-----ifdYIQWK----- 318  
DSSP lllllllllllllLHHH-----hhhHLLL-----

DSSP hhhhhhhhhhhhhllll  
Query aaqavqrfvaridratkr 292  
ident  
Sbjct -----yrepkdrse 327  
DSSP -----lllhhhhll

No 178: Query=mol1A Sbjct=8icsA Z-score=6.8

[back to top](#)

```

DSSP -----
Query ----- 0
ident
Sbjct etlnggitdmltelanfeknvsqaihkyayrkaasviakypkiksgaeakklpgvgtk 60
DSSP 1111hhhhhhhhhhhhhhhh1111hhhhhhhhhhhhhhhh111111hhhh111111hh

DSSP -----111111111h
Query -----aapyspsptnl 11
ident
Sbjct iaekideflatgklrklekirqddtssinfltrvsgigpsaarkfvdegiktledlrkn 120
DSSP hhhhhhhhh1111hhhhhh11hhhhhhhh111111hhhhhhhh111111hhhhhh1

DSSP hhhhhhhhhhh1111hhhhHHHHHHHHHHHHHH-LLLL11LLLEEEHHHHHHHHh1
Query rslrdrltqvaerqgvfgrlqRHVAXIVVAQFAA-TLTDdtGAPLLLKGGSSLELrrg 70
ident
Sbjct edklnhhqriglkyfgdfekriPREEMLMQDIVLnEVKKvdSEYIATVCGSFRGA--- 177
DSSP hhh11hhhhhhhh1hhhh11eHHHHHHHHHHHHHHHHHH11LLLEEEELLLLLL---

DSSP 1111LLLEEEEEEEL-----1LHHHHHHHHHHHHhh1111eeEEELLEEL11
Query ipdsrTSKDFATVAR-----rDIELIHEQLADAGetgwegftAIFTAPEEIIaa 118
ident
Sbjct ---eSSGDMDVLLThpsftsestkqpkLLHQVVEQLQKVH-----FITDTLSKG-- 223
DSSP ---LEELLEEEEEEEL1111111111hHHHHHHHHHHHLL-----LEEEEEEEL--

DSSP 1111LLLEEEEEEEL--EEEEEEEEEEEL-LLLL1111eeehhh111111ee
Query pgxpVKPRRFTAKLSYRG--RAFATVPIEVSSV-EAGNadqfdtltsdalglvgvpaava 175
ident
Sbjct ---ETKFMGVCQLPSKNdeKEYPHRRIDIRLIpKDQY----- 257
DSSP ---LLEEEEEEELLLLL11LLLEEEEEEELLLLH-----

DSSP ee11hHHHHhhhhhh111111111111hhhhHHHHHH-----
Query vpcxtiPWQIaqlhavlavlepkandrahdlvDLQLE----- 215
ident
Sbjct ---yCGVL-----yftgSDIFNKnmrahalekgftineytirp 292
DSSP ---hHHHH-----hhh1LHHHHhhhhhhhh1111ee11ee11

DSSP -hh11hhhhhhHHHHHHhhhh1111LLLLL11111hhhhhhhh1111111111hh
Query -gl1ldadlxptRSACIaifearaqhPWPPRVatlphwpliyagaleglhdlelartvda 274
ident
Sbjct lgvtgvageplpVDESEK-----difDYIQWK----- 318
DSSP 111111111111LLHH-----hhHHLLLL-----

DSSP hhhhhhhhhhh1111
Query aaqavqrvaridratkr 292
ident
Sbjct -----yrepkdrse 327
DSSP -----11111111

```

No 179: Query=mol1A Sbjct=9icoA Z-score=6.8

[back to top](#)

```

DSSP -----
Query ----- 0
ident
Sbjct etlnggitdmltelanfeknvsqaihkyayrkaasviakypkiksgaeakklpgvgtk 60
DSSP 1111hhhhhhhhhhhhhhhh1111hhhhhhhhhhhhhhhh111111hhhh111111hh

DSSP -----111111111h
Query -----aapyspsptnl 11
ident
Sbjct iaekideflatgklrklekirqddtssinfltrvsgigpsaarkfvdegiktledlrkn 120
DSSP hhhhhhhhh1111hhhhhh11hhhhhhhh111111hhhhhhhh111111hhhhhh1

DSSP hhhhhhhhhhh1111hhhhHHHHHHHHHHHHHH-LLLL11LLLEEEHHHHHHHHh1
Query rslrdrltqvaerqgvfgrlqRHVAXIVVAQFAA-TLTDdtGAPLLLKGGSSLELrrg 70

```



```

-----
Sbjct edklnhhqriglkyfgdfekriPREEMLQMQDIVLnEVKKvdSEYIATVCGSFRRGA--- 177
DSSP 11111hhhhhhhhhhhhhhllleEHHHHHHHHHHHHhHHHHh1LLEEEELLLLLLLL---

DSSP 11111LLEEEEEEEL-----1LHHHHHHHHHHHHhh1111eeEEELLEEL11
Query ipdsrTSKDFATVAR-----rDIELIHEQLADAGetgwegftAIFTAPEEIaa 118
ident | | | | |
Sbjct ---eSSGDMDVLLThpsftsestqpkLLHQVVEQLQKVH-----FITDTLSKG-- 223
DSSP ---1EELLEEEEEEe1111111111hhHHHHHHHHHHLL-----LEEEEEEEL--

DSSP 1111LLEEEEEEEL--EEEEEEEEEEEL-LLLL1111eeeee1hhhh11111lee
Query pgxpVKPRRFTAKLSYRG--RAFATVPIEVSSV-EAGNadqfdt1tsdalglvgpaava 175
ident | |
Sbjct ---ETKFMGVCQLPSKNdeKEYPHRRIDIRLIpKDQY----- 257
DSSP ---LLEEEEEEELLLLL11LLEEEEEEELHHHH-----

DSSP ee11hHHHHhhhhhhhh1111111111hhhhHHHHHH-----
Query vpcxtiPWQIaqklhavtavlepkandrahd1vDLQLE----- 215
ident
Sbjct ----yCGVL-----yftgSDIFNKnmrahalekgftineytirp 292
DSSP ----hHHHH-----hhh1LHHHHhhhhhhhh1leee1leeee

DSSP -hh11hhhhhhhhHHHHhhhhhh11LLELLL11111hhhhhhhh1111111111hh
Query -gllldad1xprtRSACIaifearaqhPWPPRVat1phwpliyagalegldhlelartvda 274
ident
Sbjct lgvgtvageplpVDEK-----difDYIQWK----- 318
DSSP 1111111111LLEHH-----hhHHLLELL-----

DSSP hhhhhhhhhhhhh1111
Query aaqavqrfvaridratkr 292
ident
Sbjct -----yrepkdrse 327
DSSP -----1111hh11

```

No 180: Query=mol1A Sbjct=1zqaA Z-score=6.8

[back to top](#)

```

DSSP -----
Query ----- 0
ident
Sbjct etlnggitdmltelanfeknvsqaihkynayrkaasviakyphkiksgaeakklpgvgtk 60
DSSP 11111hhhhhhhhhhhhhh1111hhhhhhhhhhhhhh111111hhhh111111hh

DSSP -----1111111111h
Query -----aapyspsptnl 11
ident
Sbjct iaekideflatgklrklekirqddtsssinf1trvsgigpsaarkfydegiktledlrkn 120
DSSP hhhhhhhhh1111hhhhhhhh1hhhhhhhh111111hhhhhhhh1111hhhhhh1

DSSP hhhhhhhhhhh1111hhhhHHHHHHHHHHHH-LLLL11LLEEEHHHHHHhh1
Query rslrdr1tqvaerqgvfgr1qRHVAXIVVAQFAA-TLTDdtGAPLLLKGGSSLELrrg 70
ident | |
Sbjct edklnhhqriglkyfgdfekriPREEMLQMQDIVLnEVKKvdSEYIATVCGSFRRGA--- 177
DSSP hhh11hhhhhhhhhhhh1leEHHHHHHHHHHHHhHHHHh1LLEEEELHHHLLL---

DSSP 11111LLEEEEEEEL-----1LHHHHHHHHHHHHhh1111eeEEELLEEL11
Query ipdsrTSKDFATVAR-----rDIELIHEQLADAGetgwegftAIFTAPEEIaa 118
ident | | | | |
Sbjct ---eSSGDMDVLLThpsftsestqpkLLHQVVEQLQKVH-----FITDTLSKG-- 223
DSSP ---1EELLEEEEEE1111111111hhHHHHHHHHHHLL-----LEEEEEEEL--

DSSP 1111LLEEEEEEEL--EEEEEEEEEEEL-LLLL1111eeeee1hhhh11111lee
Query pgxpVKPRRFTAKLSYRG--RAFATVPIEVSSV-EAGNadqfdt1tsdalglvgpaava 175
ident | |
Sbjct ---ETKFMGVCQLPSKNdeKEYPHRRIDIRLIpKDQY----- 257
DSSP ---LLEEEEEEELLLLL11LLEEEEEEELHHHH-----

```

```

DSSP ee11hHHHHhhhhhhhh1111111111hHHHHHHH-----
Query vpcxtiPWQIAqklhavtavleepkandrahdlvDLQLE----- 215
ident
Sbjct -----yCGVL-----yftgSDIFNKnmrahalekgftineytirp 292
DSSP -----hHHHH-----h11LHHHHhhhhhhhh1leee1leeee

DSSP -hh11hhhhhhHHHHhhhhhh111L1111111111hHHHHhh1111111111hHH
Query -gl1ldadlxptRSACIaifearaqhPWPPRVatlpwpliyagalegldhlelartvda 274
ident
Sbjct lgvtgvageplpVDSEK-----difDYIQWK----- 318
DSSP 1111111111111111LHH-----hhhHLLL-----

DSSP hhhhhhhhhhhhh1111
Query aaqavqrfvaridratkr 292
ident
Sbjct -----yrepkdrse 327
DSSP -----111hh111

```

No 181: Query=mol1A Sbjct=1zqnA Z-score=6.8

[back to top](#)

```

DSSP -----
Query ----- 0
ident
Sbjct etlnggitdmltelanfeknvsqaihknayrkaasviakyphkiksgaeakklpgvgtk 60
DSSP 1111hhhhhhhhhhhh1111hhhhhhhhhhhh1111111111hhhh111111hh

DSSP -----1111111111h
Query -----aapyspsptnl 11
ident
Sbjct iaekideflatgklrklekirqddtssinfltrvsgigpsaarkfvdegiktledlrkn 120
DSSP hhhhhhhhh1111hhhhhhhhhhhh111111hhhhhhhh111111hhhhhh1

DSSP hhhhhhhhhhh1111hhhhHHHHHHHHHHHHH-LLLL11LLLEEEHHHHHHhh1
Query rslrdrltqvaerqgvfgrlqRHVAXIVVAQFAA-TLTDdtGAPLLLVKGGSSLELrrg 70
ident
Sbjct edklnhhqriglkyfgdfekriPREEMLMQDIVLnEVKkvdSEYIATVCGSFRGA--- 177
DSSP hhh11hhhhhhhh1hhhh11eEHHHHHHHHHHHHHHHHH1LLEEEELLLLLL---

DSSP 11111LLLEEEEL-----1LHHHHHHHHHHHHhh1111eEELLEEL11
Query ipdsrTSKDFATVAR-----rDIELIHEQLADAGetgwegftAIFTAPEEIaa 118
ident
Sbjct ----eSSGDMDVLLThpsftsestkqpkLLHQVVEQLQKVH-----FITDTLSKG-- 223
DSSP ----LEELLEEEEEEe1111111111hhHHHHHHHHHLL-----LEEEEEEEL--

DSSP 1111LLLEEEEEEEL--EEEEEEEEEEEL-LLLL1111e1111hhhh111111lee
Query pgxpVKPRRFTAKLSYRG--RAFATVPIEVSSV-EAGNadqfdtltsdalglvgvpaava 175
ident
Sbjct ----ETKFMGVCQLPSKNdeKEYPHRRIDIRLIpKDQY----- 257
DSSP ----LLEEEEEEELLLL1111LLLEEEEEEeLLLH-----

DSSP ee11hHHHHHHhhhhhh1111111111hHHHHHHH-----
Query vpcxtiPWQIAQklhavtavleepkandrahdlvDLQLE----- 215
ident
Sbjct -----yCGVLYF-----tgSDIFNKnmrahalekgftineytirp 292
DSSP -----hHHHHHH-----1LHHHHHHhhhhhh1leee1leeee

DSSP --hh11hhhhhhHHHHhhhhhh1111L1111111111hHHHHhh1111111111hh
Query --gl1ldadlxptrSACIaifearaqhPWPPRVatlpwpliyagalegldhlelartvd 273
ident
Sbjct lgvtgvageplpvdSEKD-----ifdYIQWK----- 318
DSSP 11111111111111LHH-----hhhHLLL-----

DSSP hhhhhhhhhhhhh1111
Query aaaqavqrfvaridratkr 292
ident

```

DSSP -----111hhh111

No 182: Query=mol1A Sbjct=9icyA Z-score=6.8

[back to top](#)

DSSP -----  
Query ----- 0  
ident -----  
Sbjct etlnggitdmltelanfeknvsqaihkynayrkaasviakypkiksgaeakklpgvgtk 60  
DSSP 1111hhhhhhhhhhhhhhhh1111hhhhhhhhhhhhhhhh111111hhhhh11111hh

DSSP -----111111111h  
Query -----aapyspsptnl 11  
ident -----  
Sbjct iaekideflatgklrklekirqddtssinfltrvsgigpsaarkfvdegiktledlrkn 120  
DSSP hhhhhhhhh1111hhhhhhhhhhhhhhhh111111hhhhhhhhhh1111hhhhhh1

DSSP hhhhhhhhhhh1111hhhhhhHHHHHHHHHHHH-LLLL11LLLEEEHHHHHHhh1  
Query rslrdrltqvaerqgvfgrlqRHVAXIVVAQFAA-TLTDdtGAPLLLKGGSSLELrrg 70  
ident | |  
Sbjct edklnhhqriglkygdfekriPREEMLQMQDIVLnEVKKvdSEYIATVCGSFRGA--- 177  
DSSP hhh11hhhhhhhh1hhhhhh1eHHHHHHHHHHHHHHHHHH1LLLEEEELLLLLL---

DSSP 1111LLLEEEEL-----1LHHHHHHHHHHHHhh1111eeEEELLEEL11  
Query ipdsrTSKDFATVAR-----rDIELIHEQLADAGetgwegftAIFTAPEEIaa 118  
ident | | | | |  
Sbjct ---eSSGDMDVLLThpsftsestqpkLLHQVVEQLQKVH-----FITDTLSKG-- 223  
DSSP ---1EELLEEEEEEe1111111111hHHHHHHHHHHLL-----LEEEEEEEL--

DSSP 1111LLLEEEEEEEL--EEEEEEEEEEEL-LLLL1111eeee1hhhh11111ee  
Query pgxpVKPRRFTAKLSYRG--RAFATVPIEVSSV-EAGNadqfdtltsdalglvgvpaava 175  
ident | | | | |  
Sbjct ---ETKFMGVCQLPSKNdeKEYPHRRIDIRLIpKDQY----- 257  
DSSP ---LLEEEEEEELLLLL11LLLEEEEEEeHHHH-----

DSSP ee11hHHHHhhhhhhhh1111111111hhhhHHHHHH-----  
Query vpcxtiPWQIaqklhavlavlepkandrahdlvDLQLE----- 215  
ident -----  
Sbjct -----yCGVL-----yftgSDIFNKnmrahalekgftineytirp 292  
DSSP -----hHHHH-----hh11LHHHHhhhhhhhh1leee1leeee

DSSP -hh11hhhhhhhhHHHHHHhhhh1111LLLL11111hhhhhhhh111111111hh  
Query -g11ldadlxptRSACIAifearaqhpWPPRVatlpwpliyagalegldhlelartvda 274  
ident -----  
Sbjct lgvtgvageplpVNSEKD-----ifdYIQWK----- 318  
DSSP 111111111111LLHHH-----hhhLLLL-----

DSSP hhhhhhhhhhh1111  
Query aaqavqrfvaridratkr 292  
ident -----  
Sbjct -----yrepkdrse 327  
DSSP -----111hhh111

No 183: Query=mol1A Sbjct=9icxA Z-score=6.8

[back to top](#)

DSSP -----  
Query ----- 0  
ident -----  
Sbjct etlnggitdmltelanfeknvsqaihkynayrkaasviakypkiksgaeakklpgvgtk 60  
DSSP 1111hhhhhhhhhhhhhhhh1111hhhhhhhhhhhhhhhh111111hhhhh11111hh

DSSP -----111111111h

```

-----
ident
Sbjct iaekideflatgklrklekirqddtsssinfptrvsgigpsaarkfvdegiktledlrkn 120
DSSP hhhhhhhhhhh1111hhhhhhhhhhhhhhhhhhhh111111hhhhhhhhhh11111hhhhhhhh1

DSSP hhhhhhhhhhh1111hhhhhhhhhhhhhhhhhhhh-LLLL11LLLEEEHHHHHHHHhh1
Query rslrdrldtqvaerqgvfgrlqRHVAXIVVAQFAA-TLTDdtGAPLLLVKGGSSLELrrg 70
ident | |
Sbjct edklnhhqriglkyfgdfekriPREEMLQMqDIVLnEVKKvdSEYIATVCGSFRRGA--- 177
DSSP hhh11hhhhhhhh11hhhh1leEHHHHHHHHHHHHHHHHHh1LLEEEELLLLLL---

DSSP 11111LLLEEEEL-----1LHHHHHHHHHHHHhh1111eeEELLEEL11
Query ipdsrTSKDFATVAR-----rDIELIHEQLADAGetgwegftAIFTAPEEIaa 118
ident | | | |
Sbjct ---eSSGDMDVLLThpsftsestkpqkLLHQVVEQLQKVH-----FITDTLSKG-- 223
DSSP ---1EELLEEEEEEe1111111111hhHHHHHHHHHHLL-----LEEEEEEEL--

DSSP 11111LLLEEEEEEEL--EEEEEEEEEEEL-LLLL1111eeee1hhhh1111lee
Query pgxpVKPRRFTAKLSYRG--RAFATVPIEVSSV-EAGNadqfdtlttsdalglvgvpaava 175
ident | |
Sbjct ---ETKFMGVCQLPSKNdeKEYPHRRIDIRLIpKDQY----- 257
DSSP ---LLEEEEEEELLLLL11LLLEEEEEEeHHHH-----

DSSP eeellHHHHhhhhhhhh1111111111hhhhHHHHHH-----
Query vpcxtiPWQIaqlhavlavleekandrahdlvDLQLE----- 215
ident
Sbjct ---yCGVL-----yftgSDIFNKnmrahalekgftineytirp 292
DSSP ---hHHHH-----hh11LHHHHhhhhhhhh1lee111lee

DSSP -hh11hhhhhhhhHHHHHHhhhh1111LLLL1111hhhhhhhh1111111111hhh
Query -glldadlxptRSACIAifearaqhpWPPRVatlphwpliyagalegldhlelartvda 274
ident
Sbjct lgtvgvageplpVDSEKD-----ifdYIQWK----- 318
DSSP 111111111111LLHHH-----hhHLLLL-----

DSSP hhhhhhhhhhhhh1111
Query aaqavqrvaridratkr 292
ident
Sbjct -----yrepkdrse 327
DSSP -----111hhhh11

```

No 184: Query=mol1A Sbjct=1zqoA Z-score=6.8

[back to top](#)

```

DSSP -----
Query ----- 0
ident
Sbjct etlnggitdmltelanfeknvsqaihkynayrkaasviakyphkiksgaeakklpgvgtk 60
DSSP 1111hhhhhhhhhhhhhh1111hhhhhhhhhhhh11111111hhhh11111hh

DSSP -----111111111h
Query -----aapyspsptnl 11
ident
Sbjct iaekideflatgklrklekirqddtsssinfptrvsgigpsaarkfvdegiktledlrkn 120
DSSP hhhhhhhhhhh1111hhhhhhhhhhhhhhhhhhhh111111hhhhhhhhhh1111hhhhhh1

DSSP hhhhhhhhhhh1111hhhhhhhhhhhhhhhhhhhh-LLLL11LLLEEEHHHHHHHHhh1
Query rslrdrldtqvaerqgvfgrlqRHVAXIVVAQFAA-TLTDdtGAPLLLVKGGSSLELrrg 70
ident | |
Sbjct edklnhhqriglkyfgdfekriPREEMLQMqDIVLnEVKKvdSEYIATVCGSFRRGA--- 177
DSSP hhh11hhhhhhhh11hhhh1leEHHHHHHHHHHHHHHHHHh1LLEEEELLLLLL---

DSSP 11111LLLEEEEL-----1LHHHHHHHHHHHHhh1111eeEELLEEL11
Query ipdsrTSKDFATVAR-----rDIELIHEQLADAGetgwegftAIFTAPEEIaa 118
ident | | | |
Sbjct ---eSSGDMDVLLThpsftsestkpqkLLHQVVEQLQKVH-----FITDTLSKG-- 223
DSSP ---1EELLEEEEEEe1111111111hhHHHHHHHHHHHHLL-----LEEEEEEEL--

```

DSSP 1111LLEEEEEEEEEELL--EEEEEEEEEEEEEL-LLLL1111eeeeeLhhhh1111lee  
Query pgxpVKPRRFTAKLSYRG--RAFATVPIEVSSV-EAGNadqfdtltsdalglvgvpaava 175  
ident | |  
Sbjct ----ETKFMGVCQLPSKNdeKEYPHRRIDIRLIpKDQY----- 257  
DSSP ---LLEEEEEELLLLLL11LLLLLEEEEEEEEEeLLLH-----

DSSP eeellhHHHHhhhhhhhh1111111111hhhhHHHHHH-----  
Query vpcxtiPWQIaqlhavlavleekandrahdldvDLQLE----- 215  
ident |  
Sbjct ----yCGVL-----yftgSDIFNKnmrahalekgftineytirp 292  
DSSP ----hHHHH-----hh1LHHHHhhhhhhhh1leeeelleeee

DSSP --hh11hhhhhhhhHHHHhhhhhh1111LLLLL1111hhhhhhhh1111111111hh  
Query --gllldadlxptrSACIaifearaqhpWPPRVatlphwpliyagalegldhlelartvd 273  
ident |  
Sbjct lgvgtvageplpvdSEKD-----ifdYIQWK----- 318  
DSSP 111111111111LHHH-----hhHLLLL-----

DSSP hhhhhhhhhhhhh1111  
Query aaaqavqrfvaridratkr 292  
ident |  
Sbjct -----yrepkdrse 327  
DSSP -----111hh111

No 185: Query=mol1A Sbjct=8icgA Z-score=6.8

[back to top](#)

DSSP -----  
Query ----- 0  
ident |  
Sbjct etlnggitdmltelanfeknvsqaihkynayrkaasviakyphkiksgaeakklpgvgtk 60  
DSSP 1111hhhhhhhhhhhhhh1111hhhhhhhhhhhhhh111111hhhh111111hh

DSSP -----1111111111h  
Query -----aapyspntnl 11  
ident |  
Sbjct iaekideflatgklrklekirqddtssinfltrvsgigpsaarkfvdegiktledlrkn 120  
DSSP hhhhhhhhh1111hhhhhhhh1hhhhhhhh111111hhhhhhhh1111hhhhhh1

DSSP hhhhhhhhhhh1111hhhhHHHHHHHHHHHH-LLLL11LLEEEEEHHHHHHhh1  
Query rslrdrltqvaerqgvfgrlqRHVAXIVVAQFAA-TLTDdtGAPLLLKGGSSLELrrg 70  
ident | |  
Sbjct edklnhhqriglkyfgdfekriPREEMLQMQDIVLnEVKkvdSEYIATVCGSFRFGA--- 177  
DSSP hhh11hhhhhhhh1hhhh11eHHHHHHHHHHHHHHHH1LLEEEELLLLLL---

DSSP 1111LLEEEEEEL-----1LHHHHHHHHHHHHhh1111eeEELLEEL11  
Query ipdsrTSKDFATVAR-----rDIELIHEQLADAGetgwegftAIFTAPEEIaa 118  
ident | | | |  
Sbjct ----eSSGDMDVLLThpsftsestkqpkLLHQVVEQLQKVH-----FITDTLSKG-- 223  
DSSP ----1EELLEEEEEe1111111111hHHHHHHHHHHH-----LEEEEEEL--

DSSP 1111LLEEEEEEEEEELL--EEEEEEEEEEEEEL-LLLL1111eeeeeLhhhh1111lee  
Query pgxpVKPRRFTAKLSYRG--RAFATVPIEVSSV-EAGNadqfdtltsdalglvgvpaava 175  
ident | |  
Sbjct ----ETKFMGVCQLPSKNdeKEYPHRRIDIRLIpKDQY----- 257  
DSSP ---LLEEEEEELLLLLL11LLLLLEEEEEEEEEeHHHH-----

DSSP eeellhHHHHhhhhhhhh1111111111hhhhHHHHHH-----  
Query vpcxtiPWQIaqlhavlavleekandrahdldvDLQLE----- 215  
ident |  
Sbjct ----yCGVL-----yftgSDIFNKnmrahalekgftineytirp 292  
DSSP ----hHHHH-----hh1LHHHHhhhhhhhh1111111111

DSSP --hh11hhhhhhhhHHHHhhhhhh1111LLLLL1111hhhhhhhh1111111111hh  
Query --gllldadlxptrSACIaifearaqhpWPPRVatlphwpliyagalegldhlelartvd 273

Sbjct lgvTgvageplpvdSEKD-----ifdYIQWK----- 318  
DSSP 11111111111111LHHH-----hhhHLLL-----

DSSP hhhhhhhhhhhhhhh1111  
Query aaaqavqrfvaridratkr 292  
ident  
Sbjct -----yrepkdrse 327  
DSSP -----111hhh111

No 186: Query=mol1A Sbjct=1zqeA Z-score=6.8

[back to top](#)

DSSP -----  
Query ----- 0  
ident  
Sbjct etlnggitdmltelanfeknvsqaihkynayrkaasviakypkiksgaeakklpgvgtk 60  
DSSP 1111hhhhhhhhhhhhhh1111hhhhhhhhhhhhhhhh111111hhhhhh11111hh

DSSP -----1111111111h  
Query -----aapyspntnl 11  
ident  
Sbjct iaekideflatgklrklekirqddtsssinftrvsgigpsaarkfvdegiktledlrkn 120  
DSSP hhhhhhhhhhh1111hhhhhhhhhhhhhhhh111111hhhhhhhhhh11111hhhhhhhh

DSSP hhhhhhhhhhhhh1111hhhhhhHHHHHHHHHHHH-LLLL11LLLEEEHHHHHHHHhh1  
Query rslrdrltqvaerqgvfgrlqRHVAXIVVAQFAA-TLTDdtGAPLLLVKGSSELELrrg 70  
ident  
Sbjct edklnhhqriglkygdfekriPREEMLQMQDIVLnEVKKvdSEYIATVCGSFRGA--- 177  
DSSP 11111hhhhhhhhhhhhhh11eHHHHHHHHHHHHHHHHHH1LLLEEEELLLLLL---

DSSP 11111LLLEEEEL-----1LHHHHHHHHHHHHhh1111eeEEELLEEL11  
Query ipdsrTSKDFATVAR-----rDIELIHEQLADAGetgwegftAIFTAPEEIaa 118  
ident  
Sbjct ---eSSGDMVLLThpsftsestkpklLHQVVEQLQKVH-----FITDTLSKG-- 223  
DSSP ---1EELLEEELLLL1111111111hhHHHHHHHHHHLL-----LEEEEL---

DSSP 11111LLLEEEEL-----EEEEEEEEEEL-LLLL1111eeehhhhh11111lee  
Query pgxpVKPRRFTAKLSYRG--RAFATVPIEVSSV-EAGNadqfdtltsdalglvgvpaava 175  
ident  
Sbjct ---ETKFMGVCQLPSKNdeKEYPHRRIDIRLIpKDQY----- 257  
DSSP ---LEEEELLLL1111111111LLLEEEEL1HHHH-----

DSSP ee11hHHHHhhhhhhhh111111111111hhhhHHHHHH-----  
Query vpcxtiPWQIaqklhavtavleekandrahdlvDLQLE----- 215  
ident  
Sbjct ---yCGVL-----yftgSDIFNKnmrahalekgftineytirp 292  
DSSP ---hHHHH-----hh11LHHHHhhhhhhhh1111eeelleeee

DSSP --hh11hhhhhhhhHHHHhhhhhh111111111111hhhhhhhhhh1111111111hh  
Query --g11ldadlxptrSACIaifearaqhpWPPRVatlpwplyagalegldhlelartvd 273  
ident  
Sbjct lgvTgvageplpvdSEKD-----ifdYIQWK----- 318  
DSSP 11111111111111LHHH-----hhhHLLL-----

DSSP hhhhhhhhhhhhhhh1111  
Query aaaqavqrfvaridratkr 292  
ident  
Sbjct -----yrepkdrse 327  
DSSP -----111hhh111

No 187: Query=mol1A Sbjct=1zqgA Z-score=6.8

[back to top](#)

```

-----
Query ----- 0
ident
Sbjct etlnggitdmltelanfeknvsqaihkynayrkaasviakyphkiksgaeakklpgvgtk 60
DSSP 1111hhhhhhhhhhhhhhhh1111hhhhhhhhhhhhhhhh111111hhhh111111hh

DSSP -----111111111h
Query -----aapyspsptnl 11
ident
Sbjct iaekideflatgklrklekirqddtsssinfltrvsgigpsaarkfvdegiktledlrkn 120
DSSP hhhhhhhhh1111hhhhhhhhhhhhhhhh111111hhhhhhhhhh1111hhhhhh1

DSSP hhhhhhhhhhh1111hhhhhhHHHHHHHHHHHH-LLLL11LLLLEEEHHHHHHHHhh1
Query rslrdrltqvaerqgvfgrlqRHVAXIVVAQFAA-TLTDdtGAPLLLKGGSSLELrrg 70
ident | |
Sbjct edklnhhqriglkygdfekriPREEMLQMqDIVLnEVKkVdSEYIATVCGSFRRGA--- 177
DSSP hhh11hhhhhhhh1hhhhhh1eEHHHHHHHHHHHHHHHHhh1LLEEEEEE111111---

DSSP 1111LLLLEEEEL-----1LHHHHHHHHHHHHhh1111eeEEELLEEL11
Query ipdsrTSKDFATVAR-----rDIELIHEQLADAGetgwegftAIFTAPEEIaa 118
ident | | |
Sbjct ---eSSGDMDVLLThpsftsestqpkLLHQVVEQLQKVH-----FITDTLSKG-- 223
DSSP ---1EELLEEEEEE111111111111hHHHHHHHHHHHHL-----LEEEEEEEL--

DSSP 1111LLLLEEEEEEEL--EEEEEEEEEEELLLL111111eeee1hhhh111111lee
Query pgxpVKPRRFATAKLSYRG--RAFATVPIEVSSVEAGNAdqfdtltsdalglvgvpaavav 176
ident | |
Sbjct ---ETKFMGVCQLPSKNdeKEYPHRRIDIRLIPKDQY----- 257
DSSP ---LLEEEEEE111111111111LLEEEEEE111111LH-----

DSSP eel1hHHHHhhhhhhhh111111111111hhhhHHHHHH-----
Query pcxtiPWQIaqklhavtavleepkandrahd1vDLQLE----- 215
ident
Sbjct ---yCGVL-----yftgSDIFNKNmrahalekgftineytirpl 293
DSSP ---hHHHH-----hh11LHHHHhhhhhhhhhh1leeeleeeel

DSSP -hh11hhhhhhhhHHHHhhhhhh1111LLL111111hhhhhhhh1111111111hh
Query -gllldadlxptrSACIaifearaqhpWPPRVat1phwpliyagalegldhlelartvda 274
ident |
Sbjct gvtgvageplpvdSEKD-----ifdYIQWK----- 318
DSSP 111111111111LHHH-----hhhL1111-----

DSSP hhhhhhhhhhhhh1111
Query aaqavqrfrvaridratkr 292
ident
Sbjct -----yrepkdrse 327
DSSP -----111hhhh111

```

No 188: Query=mol1A Sbjct=1zqrA Z-score=6.8

[back to top](#)

```

DSSP -----
Query ----- 0
ident
Sbjct etlnggitdmltelanfeknvsqaihkynayrkaasviakyphkiksgaeakklpgvgtk 60
DSSP 1111hhhhhhhhhhhhhhhh1111hhhhhhhhhhhhhhhh111111hhhh111111hh

DSSP -----111111111h
Query -----aapyspsptnl 11
ident
Sbjct iaekideflatgklrklekirqddtsssinfltrvsgigpsaarkfvdegiktledlrkn 120
DSSP hhhhhhhhh1111hhhhhhhhhhhhhhhh111111hhhhhhhhhh1111hhhhhh1

DSSP hhhhhhhhhhh1111hhhhhhHHHHHHHHHHHH-LLLL11LLLLEEEHHHHHHHHhh1
Query rslrdrltqvaerqgvfgrlqRHVAXIVVAQFAA-TLTDdtGAPLLLKGGSSLELrrg 70
ident | |
Sbjct edklnhhqriglkygdfekriPREEMLQMqDIVLnEVKkVdSEYIATVCGSFRRGA--- 177
DSSP hhh11hhhhhhhh1hhhhhh1eEHHHHHHHHHHHHHHHHhh1LLEEEEEE111111---

```

```

DSSP 11111LLLLLEEEEL-----1LHHHHHHHHHHHHhh1111eeEEELLLEEL11
Query ipdsrTSKDFATVAR-----rDIELIHEQLADAGetgwegftAIFTAPEEIIaa 118
ident | | | | |
Sbjct ---eSSGDMDVLLThpsftsestqpkLLHQVVEQLQKVH-----FITDTLSKG-- 223
DSSP ---1EELLEEEEEE1111111111hhHHHHHHHHHHLL-----LEEEEEEEL--

```

```

DSSP 11111LLLLLEEEEEEELL--EEEEEEEEEEEL-LLLL1111eeeee1hhhh11111lee
Query pgxpVKPRRFTAKLSYRG--RAFATVPIEVSSV-EAGNadqfdtlttsdalglvgvpaava 175
ident | | | | |
Sbjct ---ETKFMGVCQLPSKNdeKEYPHRRIDIRLIpKDQY----- 257
DSSP ---LLEEEEEEELLLLL1111111111LEEEEEEEL1HHHH-----

```

```

DSSP ee11hHHHHhhhhhhhh11111111111hhhhHHHHHH-----
Query vpcxtiPWQIaqklhavtavleekandrahdlvDLQLE----- 215
ident | | | | |
Sbjct ---yCGVL-----yftgSDIFNKnmrahalekgftineytirp 292
DSSP ---hHHHH-----hh11LHHHHhhhhhhhh1leee1leeee

```

```

DSSP --hh11hhhhhhhhHHHHhhhhhh1111LLLLL1111hhhhhhhh1111111111hh
Query --g11ldadlxptrSACIaifearaqhpWPPRVatlpwpliayagalegldhlelartvd 273
ident | | | | |
Sbjct lgvtgvagelplpvdSEKD-----ifdYIQWK----- 318
DSSP 11111111111111LHHH-----hhhHLLL-----

```

```

DSSP hhhhhhhhhhhhhhh1111
Query aaaqavqrvaridratkr 292
ident | | | | |
Sbjct -----yrepkdrse 327
DSSP -----111hh111

```

No 189: Query=mol1A Sbjct=1zqqA Z-score=6.8

[back to top](#)

```

DSSP -----
Query ----- 0
ident | | | | |
Sbjct etlnggitdmltelanfeknvsqaihknayrkaasviakyphkiksgaeakklpgvgtk 60
DSSP 1111hhhhhhhhhhhhhh1111hhhhhhhhhhhhhh111111hhhh111111hh

```

```

DSSP -----1111111111h
Query -----aapyspsptnl 11
ident | | | | |
Sbjct iaekideflatgklrklekirqddtssinfltrvsgigpsaarkfvdegiktledlrkn 120
DSSP hhhhhhhhhhh1111hhhhhhhhhhhhhhhh11111hhhhhhhhhh1111hhhhhh1

```

```

DSSP hhhhhhhhhhhhh1111hhhhHHHHHHHHHHHH-LLLL1111LEEEHHHHHHHHhh1
Query rslrdrltqvaerqgvfgrlqRHVAXIVVAQFAA-TLTDdtGAPLLLVKGSSELELrrg 70
ident | | | | |
Sbjct edklnhhqriglkygdfekriPREEMLMQDIVLnEVKKvdSEYIATVCGSFRRGA--- 177
DSSP 11111hhhhhhhh1hhhh11eEHHHHHHHHHHHHHHHH1111LEEEELHHHHLLL---

```

```

DSSP 11111LLLLLEEEEL-----1LHHHHHHHHHHHHhh1111eeEEELLLEEL11
Query ipdsrTSKDFATVAR-----rDIELIHEQLADAGetgwegftAIFTAPEEIIaa 118
ident | | | | |
Sbjct ---eSSGDMDVLLThpsftsestqpkLLHQVVEQLQKVH-----FITDTLSKG-- 223
DSSP ---1EELLEEEEEE1111111111hHHHHHHHHHHHHLL-----LEEEEEEEL--

```

```

DSSP 11111LLLLLEEEEEEELL--EEEEEEEEEEEL-LLLL1111eeeee1hhhh11111lee
Query pgxpVKPRRFTAKLSYRG--RAFATVPIEVSSV-EAGNadqfdtlttsdalglvgvpaava 175
ident | | | | |
Sbjct ---ETKFMGVCQLPSKNdeKEYPHRRIDIRLIpKDQY----- 257
DSSP ---LLEEEEEEELLLLL1111111111LEEEEEEELLLLH-----

```

```

DSSP ee11hHHHHhhhhhhhh11111111111hhhhHHHHHH-----

```



ident  
Sbjct -----yCGVL-----yftgSDIFNKnmrahalekgftineytirp 292  
DSSP -----hHHHH-----hhl1LHHHHHHhhhhhhhhllleeeelleeee

DSSP -hhllhhhhhhHHHHHHhhhhhh1111LLLLL1111hhhhhhhh1111111111hh  
Query -gllldadlxptRSACIaifearaqhpWPPRVatlphwpliyagalegldhlelartvda 274  
ident  
Sbjct lgvvgvageplpVDSEK-----difdYIQWK----- 318  
DSSP 1111111111111111LHH-----hhhHLLL-----

DSSP hhhhhhhhhhhhh1111  
Query aaqavqrfvaridratkr 292  
ident  
Sbjct -----yrepkdrse 327  
DSSP -----111hh111

No 190: Query=mol1A Sbjct=7icpA Z-score=6.8

[back to top](#)

DSSP -----  
Query ----- 0  
ident  
Sbjct etlnggitdmltelanfeknvsqaihknayrkaasviakypkiksgaeakklpgvgtk 60  
DSSP 1111hhhhhhhhhhhhhhhh1111hhhhhhhhhhhhhhhh111111hhhh111111hh

DSSP -----1111111111h  
Query -----aapyspsptnl 11  
ident  
Sbjct iaekideflatgklrklekirqddtssinfltrvsgigpsaarkfvdegiktledlrkn 120  
DSSP hhhhhhhhh1111hhhhhh11hhhhhhhh111111hhhhhhhh1111hhhhhh1111hhhhhh1

DSSP hhhhhhhhhhh1111hhhhHHHHHHHHHHHH-LLLL11LLLEEEHHHHHHhh1  
Query rslrdrltqvaerqgvfgrlqRHVAXIVVAQFAA-TLTDdtGAPLLLKGGSSLELrrg 70  
ident  
Sbjct edklnhhqriglkygdfekriPREEMLQMqDIVLnEVKkvdSEYIATVCGSFRGA--- 177  
DSSP 11111hhhhhhhh1hhhh1leEHHHHHHHHHHHHHHHHHH1LLEEEELHLLL---

DSSP 11111LLLEEEEL-----1LHHHHHHHHHHhh1111eeEEELLEEL11  
Query ipdsrTSKDFATVAR-----rDIELIHEQLADAGetgwegftAIFTAPEEIaa 118  
ident  
Sbjct ---eSSGDMdVLLThpsftsestkqpkLLHQVVEQLQKVH-----FITDTLSKG-- 223  
DSSP ---1EELLEEEEL1111111111hhHHHHHHHHHHHL-----LEEEEEEEL--

DSSP 11111LLLEEEEEEEL--EEEEEEEEEEEL-LLLL1111eeee1hhhh11111ee  
Query pgxpVKPRRFTAKLSYRG--RAFATVPIEVSSV-EAGNadqfdtltsdalglvgvpaava 175  
ident  
Sbjct ---ETKFMGVCQLPSKNdeKEYPHRRIDIRLIpKDQY----- 257  
DSSP ---LLEEEEEEELLLL1111111111LHHHHHHHHHHHL-----

DSSP eeellhHHHHhhhhhh1111111111hhhhHHHHHH-----  
Query vpcxtiPWQIaqklhavtavlepkandrahdlvDLQLE----- 215  
ident  
Sbjct -----yCGVL-----yftgSDIFNKnmrahalekgftineytirp 292  
DSSP -----hHHHH-----hhl1LHHHHHHhhhhhhhhllleeeelleeee

DSSP -hhllhhhhhhHHHHHHhhhhhh1111LLLLL1111hhhhhhhh1111111111hh  
Query -gllldadlxptRSACIaifearaqhpWPPRVatlphwpliyagalegldhlelartvda 274  
ident  
Sbjct lgvvgvageplpVDSEKD-----ifdYIQWK----- 318  
DSSP 1111111111111111LHH-----hhhHLLL-----

DSSP hhhhhhhhhhhhh1111  
Query aaqavqrfvaridratkr 292  
ident  
Sbjct -----yrepkdrse 327  
DSSP -----111hh111

No 191: Query=mol1A Sbjct=1zqiA Z-score=6.8

[back to top](#)

```

DSSP -----
Query ----- 0
ident
Sbjct etlnggitdmltelanfeknvsqaihkynayrkaasviakypkiksgaeakklpgvgtk 60
DSSP 1111hhhhhhhhhhhhhhhh1111hhhhhhhhhhhhhh11111111hhhh111111hh

```

```

DSSP -----1111111111h
Query -----aapyspptnl 11
ident
Sbjct iaekideflatgklrklekirqddtsssinfltrvsgigpsaarkfvdegiktledlrkn 120
DSSP hhhhhhhhh1111hhhhhhhh1hhhhhhhh111111hhhhhhhh1111hhhhhh1

```

```

DSSP hhhhhhhhhhh1111hhhhHHHHHHHHHHHH-LLLL1111LLEEEHHHHHHHHhh1
Query rslrdrltqvaerqgvfgrlqRHVAXIVVAQFAA-TLTDdtGAPLLLKGGSSLELrrg 70
ident
Sbjct edklnhhqriglkyfgdfekriPREEMLQMqDIVLnEVKKvdSEYIATVCGSFRRGA--- 177
DSSP hhh11hhhhhhhh1hhhhhh1eHHHHHHHHHHHHHHHHHh1LLEEEELLLLLL---

```

```

DSSP 11111LLEEEEL-----1LHHHHHHHHHHHHhh1111eeEEELLEEL11
Query ipdsrTSKDFATVAR-----rDIELIHEQLADAGetgwegftAIFTAPEEIaa 118
ident
Sbjct ---eSSGDMDVLLThpsftsestkqpkLLHQVVEQLQKVH-----FITDTLSKG-- 223
DSSP ---1EELLEEEEEE1111111111hhHHHHHHHHHHLL-----LEEEEEEEL--

```

```

DSSP 1111LLEEEEEEEL--EEEEEEEEEEEL-LLLL1111eeee1hhhh11111ee
Query pgxpVKPRRFTAKLSYRG--RAFATVPIEVSSV-EAGNadqfdtltsdalglvgpaava 175
ident
Sbjct ---ETKFMGVCQLPSKNdeKEYPHRRIDIRLIpKDQY----- 257
DSSP ---LLEEEEEEELLLLL1111LLEEEEEEEL1111LH-----

```

```

DSSP eeellHHHHhhhhhhhh11111111111hhhhHHHHHH-----
Query vpcxtiPWQIaqlh'avtaveepkandrahd1vDLQLE----- 215
ident
Sbjct ---yCGVL-----yftgSDIFNKmrahalekgftineytirp 292
DSSP ---hHHHH-----hh11LHHHHhhhhhhhh1leeeelleee

```

```

DSSP --hh11hhhhhhhhHHHHhhhhhh1111LLLLL1111hhhhhhhh11111111hh
Query --gllldadlxptrSACIaifearaqhpWPPRVat1phwplyagaleglhdhlelartvd 273
ident
Sbjct lgvtagveplpvdSEKD-----ifdYIQWK----- 318
DSSP 111111111111LHHH-----hhHLLLL-----

```

```

DSSP hhhhhhhhhhhhh1111
Query aaaqavqrfvaridratkr 292
ident
Sbjct -----yrepkdrse 327
DSSP -----111hh111

```

No 192: Query=mol1A Sbjct=1zqfA Z-score=6.8

[back to top](#)

```

DSSP -----
Query ----- 0
ident
Sbjct etlnggitdmltelanfeknvsqaihkynayrkaasviakypkiksgaeakklpgvgtk 60
DSSP 1111hhhhhhhhhhhhhhhh1111hhhhhhhhhhhhhh11111111hhhh111111hh

```

```

DSSP -----1111111111h
Query -----aapyspptnl 11
ident

```

```

DSSP hhhhhhhhhhh1111hhhhhhhhhhhhhhhhhhhhhh111111hhhhhhhhhhhh1111hhhhhhhh
DSSP hhhhhhhhhhhhh1111hhhhHHHHHHHHHHHHHH-LLLL11LLLLEEEHHHHHHHHhh1
Query rslrdr1tqvaerqgvfgr1qRHVAXIVVAQFAA-TLTDdtGAPLLLKGGSSLELrrg 70
ident | |
Sbjct edklnhhqriglkyfgdfekriPREEMLQMQUIVLnEVKKvdSEYIATVCGSFRFGA--- 177
DSSP hhh11hhhhhhhhhhhhhh11eHHHHHHHHHHHHHHHHHH1LLLLEEEELLLLLLLL---

DSSP 11111LLLLEEEEL-----1LHHHHHHHHHHHHhh1111eeEELLEEL11
Query ipdsrTSKDFATVAR-----rDIELIHEQLADAGetgwegftAIFTAPEEIaa 118
ident | |
Sbjct ----eSSGDMVLLThpsftsestqpkLLHQVVEQLQKVH-----FITDTLSKG-- 223
DSSP ----1EELLEEEEEEe111111111hhHHHHHHHHHHLL-----LEEEEEEEL--

DSSP 1111LLLLEEEEEEEL--EEEEEEEEEEEL-LLLL1111eeeehhhh11111lee
Query pgxpVKPRRFTAKLSYRG--RAFATVPIEVSSV-EAGNadqfdt1tsdalglvgvpaava 175
ident | |
Sbjct ---ETKFMGVCQLPSKNdeKEYPHRRIDIRLIpKDQY----- 257
DSSP ---LLEEEEEEELLLLL11LLLLEEEEEEeHHHH-----

DSSP ee11hHHHHhhhhhhhh1111111111hhhhHHHHHH-----
Query vpcxtiPWQIaqlhavtavleekandrahdlvDLQLE----- 215
ident | |
Sbjct ----yCGVL-----yftgSDIFNKnmrahalekgftineytirp 292
DSSP ----hHHHH-----hhh1LHHHHhhhhhhhh1leee1leeee

DSSP -hh11hhhhhhHHHHHHhhhhhh1111LLL11111hhhhhhhh1111111111hh
Query -gl1ldadlxptRSACIaifearaqhpWPPRVatlphwpliyagalegldhlelartvda 274
ident | |
Sbjct lgvtgavageplpVDESEK-----difDYIQW----- 317
DSSP 1111111111111111LH-----hhhHLLL-----

DSSP hhhhhhhhhhhhh1111
Query aaqavqrfvaridratkr 292
ident | |
Sbjct -----kyrepkdrse 327
DSSP -----1111hh111

```

No 193: Query=mol1A Sbjct=1zqpA Z-score=6.8

[back to top](#)

```

DSSP -----
Query ----- 0
ident -----
Sbjct etlnggitdmltelanfeknvsqaihkynayrkaasviakyphkiksgaeakklpgvgtk 60
DSSP 1111hhhhhhhhhhhhhhhh1111hhhhhhhhhhhhhhhh111111hhhhhh11111hh

DSSP -----1111111111h
Query -----aapyssptnl 11
ident -----
Sbjct iaekideflatgklrklekirqddtssinfltrvsgigpsaarkfvdegiktledlrkn 120
DSSP hhhhhhhhhhh1111hhhhhhhhhhhhhhhh111111hhhhhhhhhh1111hhhhhh1

DSSP hhhhhhhhhhhhh1111hhhhHHHHHHHHHHHHHH-LLLL11LLLLEEEHHHHHHHHhh1
Query rslrdr1tqvaerqgvfgr1qRHVAXIVVAQFAA-TLTDdtGAPLLLKGGSSLELrrg 70
ident | |
Sbjct edklnhhqriglkyfgdfekriPREEMLQMQUIVLnEVKKvdSEYIATVCGSFRFGA--- 177
DSSP hhh11hhhhhhhhhhhhhh11eHHHHHHHHHHHHHHHHHH1LLLLEEEELLLLLLLL---

DSSP 11111LLLLEEEEL-----1LHHHHHHHHHHHHhh1111eeEELLEEL11
Query ipdsrTSKDFATVAR-----rDIELIHEQLADAGetgwegftAIFTAPEEIaa 118
ident | |
Sbjct ----eSSGDMVLLThpsftsestqpkLLHQVVEQLQKVH-----FITDTLSKG-- 223
DSSP ----1EELLEEEEEEe111111111hhHHHHHHHHHHLL-----LEEEEEEEL--

```



DSSP hhhhhhhhhhhhhhh1111  
Query aaqavqrfvaridratkr 292  
ident  
Sbjct -----kyrepkdrse 327  
DSSP -----1111111111

No 195: Query=mol1A Sbjct=9icaA Z-score=6.8

[back to top](#)

DSSP -----  
Query ----- 0  
ident  
Sbjct etlnggitdmltelanfeknvsqaihkynayrkaasviakypkiksgaeakklpgvgtk 60  
DSSP 1111hhhhhhhhhhhhhh1111hhhhhhhhhhhhhh111111hhhh111111hh

DSSP -----1111111111h  
Query -----aapyspntl 11  
ident  
Sbjct iaekideflatgklrklekirqddtsssinfptrvsgigpsaarkfvdegiktledlrkn 120  
DSSP hhhhhhhhh1111hhhhhhhhhhhhhh111111hhhhhhhh1111hhhhhh1

DSSP hhhhhhhhhhh1111hhhhhhHHHHHHHHHHHH-LLLL11LLLLEEEHHHHHHhh1  
Query rslrdrltqvaerqgvfgrlqRHVAXIVVAQFAA-TLTDdtGAPLLLKGGSSLELrrg 70  
ident | |  
Sbjct edklnhhqriglkygdfekriPREEMLMQDIVLnEVKKvdSEYIATVCGSFRRGA--- 177  
DSSP hhh11hhhhhh11111111eEHHHHHHHHHHHHhHHHHh1LLEEEELLLLLL---

DSSP 1111LLLLEEEEL-----1LHHHHHHHHHHhh1111eeEELLEEL11  
Query ipdsrTSKDFATVAR-----rDIELIHEQLADAGetgwegftAIFTAPEEIaa 118  
ident | | | |  
Sbjct ---eSSGMDVLLThpsftsestkqpkLLHQVVEQLQKVH-----FITDTLSKG-- 223  
DSSP ---1EELLEEEEEEe1111111111hHHHHHHHHHHLL-----LEEEEEEEL--

DSSP 1111LLLLEEEEEEEL--EEEEEEEEEEEL-LLLL1111eeeee1hhhh11111ee  
Query pgxpVKPRRFTAKLSYRG--RAFATVPIEVSSV-EAGNadqfdtlttsdalglvgpaava 175  
ident | |  
Sbjct ---ETKFMGVCQLPSKNdeKEYPHRRIDIRLIpKDQY----- 257  
DSSP ---LLEEEEEEELLLL11LLLLEEEEEEeHHHH-----

DSSP ee11hHHHHhhhhhh1111111111hhhhHHHHHH-----  
Query vpcxtiPWQIaqklhavlavlepkandrahd1vDLQLE----- 215  
ident  
Sbjct ----yCGVL-----yftgSDIFNKnmrahalekgftineytirp 292  
DSSP ----hHHHH-----hh1LHHHHhhhhhh1leee1leeee

DSSP -hh11hhhhhhHHHHHHhhhh1111LLL1111hhhhhhhh1111111111hh  
Query -gllldadlxtRSACIAifearaqhpWPPRVat1phwpliyagalegldhlelartvda 274  
ident  
Sbjct lgvgtvageplpVDSEKD-----ifdYIQWK----- 318  
DSSP 1111111111111111HHH-----hhHLLL-----

DSSP hhhhhhhhhhhhh1111  
Query aaqavqrfvaridratkr 292  
ident  
Sbjct -----yrepkdrse 327  
DSSP -----111hh111

No 196: Query=mol1A Sbjct=3c2mA Z-score=6.8

[back to top](#)

DSSP -----  
Query ----- 0

```

Sbjct tlnggitdmltelanfeknvsqaihkynayrkaasviakyphkiksgaeakklpgvgtki 60
DSSP 111hhhhhhhhhhhhhhhh1111hhhhhhhhhhhhhhhh111111hhhh11111hhhh

DSSP -----111111111hh
Query -----aapyspptnlr 12
ident

Sbjct aekideflatgklrklekirqddtsssinflltrvsgigpsaarkfvdegiktledlrkne 120
DSSP hhhhhhhhhhh111hhhhhhhh1hhhhhhhhhh111111hhhhhhhhhh11111hhhhhhhh

DSSP hhhhhhhhhhh1111hhhhHHHHHHHHHHHHH-LLLLLLLLLLEEEHHHHHHHHhh11
Query slrdrltqvaerqgvfgrlqRHVAXIVVAQFAA-TLDDTGAPLLLKVGGSSELErrgi 71
ident | |
Sbjct dklnhhqrigrkyfgdfekriPREEMLQMQDIVLnEVKKVDSEYIATVCGSFRRGA---- 176
DSSP h111hhhhhhhh1hhhhhh11eHHHHHHHHHHHHHHHHHHLLLLLEEEELHHHHLLL----

DSSP 1111LLLLLEEEEL-----1LHHHHHHHHHHHHhh1111eEEELLEEL111
Query pdsrTSKDFATVAR-----rDIELIHEQLADAGetgwegftAIFTAPEElaap 119
ident | | | |
Sbjct ---eSSGDMVDLLThpsftsestqpkLLHQVVEQLQKVH-----FITDTLSKG--- 222
DSSP ---1EELLEEEEE1111111111111111HHHHHHHHHHHLL-----LEEEEEEL---

DSSP 1111LEEEEEEEEL--LEEEEEEEEEEEL-LLLL1111eEEEElhhhh111111ee
Query gxpVKPRRF TAKLSYR--GRAFATVPIEVSSV-EAGNadqfdtlttsdalglvgvpaavav 176
ident | |
Sbjct ---ETKFMGVCQLPSKndEKEYPHRRIDIRLIpKDQY----- 256
DSSP ---LEEEEEELLLL1111111111111111HHHH-----

DSSP eellHHHHHHhhhhhhhh111111111111hhhhHHHHHHHLL-----1HHHH-----
Query pcxtiPWQIaqklhavtavleepkandrahd1vDLQLEGLL-----1DADL----- 223
ident
Sbjct ----yCGVL-----yftgSDIFNKNMRahalekgFTINeytirpl 292
DSSP ----hHHHH-----hhh1LHHHHHHHHhhhh11EEEL111eeel

DSSP -----hhhHHHHHHhhhhhh1111LLLLL11111hhhhhhhh1111111111hhhh
Query -----xptRSACIaifearaqhpWPPRVat1phwpliyagalegldhlelartvdaa 275
ident
Sbjct gvtgvageplpVDSEK-----difDYIQW----- 316
DSSP 1111111111111111LHH-----hhhhHLLL-----

DSSP hhhhhhhhhhh1111
Query aqavqrfvaridratkr 292
ident
Sbjct -----kyrepkdrse 326
DSSP -----1111hhhh111

```

No 197: Query=mol1A Sbjct=1huzA Z-score=6.8

[back to top](#)

```

DSSP -----
Query ----- 0
ident

Sbjct tlnggitdmlvelanfeknvsqaihkynayrkaasviakyphkiksgaeakklpgvgtki 60
DSSP 111hhhhhhhhhhhhhhhh1111hhhhhhhhhhhhhhhh111111hhhh11111hhhh

DSSP -----111111111hh
Query -----aapyspptnlr 12
ident

Sbjct aekideflatgklrklekirqddtsssinflltrvtgigpsaarklvdegiktledlrkne 120
DSSP hhhhhhhhhhh111hhhhhhhh1hhhhhhhhhh111111hhhhhhhhhh11111hhhh1111

DSSP hhhhhhhhhhh1111hhhhHHHHHHHHHHHHH-LLLLLLLLLLEEEHHHHHHHHhh11
Query slrdrltqvaerqgvfgrlqRHVAXIVVAQFAAT-TLDDTGAPLLLKVGGSSELErrgi 71
ident | |
Sbjct dklnhhqrigrkyfedfekriPREEMLQMQDIVLNeVKKLDPEYIATVCGSFRRGA---- 176
DSSP 1111hhhhhhhh1hhhhhh11eHHHHHHHHHHHHHHHHHHLLLLLEEEELLLLLLLL----

```

DSSP 1111LLLLEEEEEL-----1LHHHHHHHHHHHHhh1111eeEEEELLEEL111  
 Query pdsrTSKDFATVAR-----rDIELIHEQLADAGetgwegftAIFTAPEEiaap 119  
 ident | | | | |  
 Sbjct ---eSSGDMDVLLThpnftsesskqpkLLHRVVEQLQKVR-----FITDTLSKG--- 222  
 DSSP ---1EELLEEEL1111111111hHHHHHHHHHHLL-----LEEEEEEL---

DSSP 1111LLEEEEEEEEL--1EEEEEEEEEEEL-LLLL1111eeeee1hhh11111eee  
 Query gxpVKPRRFTAKLSYR--gRAFATVPIEVSSV-EAGNadqfdtltaldglvqvpaavav 176  
 ident | | | | |  
 Sbjct ---ETKFMGVCQLPSEndENEYPHRRIDIRLlpKDQY----- 256  
 DSSP ---LLEEEEEELLLL1111111111LLEEEEEEEEL1HHHH-----

DSSP eellhHHHHhhhhhh1111111111HHHHHH-----hhhhh  
 Query pcxtiPWQIaqklhavtavleekandraHDLVDLQ-----llegl 217  
 ident | | | | |  
 Sbjct ---yCGVL-----yftgSDIFNKNmrahalekgftineytirplgvtg 296  
 DSSP ---hHHHH-----h111LHHHHHHHHHHHHhhleell1111eee11111

DSSP 11hHHHHhhHHHHhhhh1111111111HHHHHHHHHH1111111111hhhhh  
 Query 1ldADLXptRSACIaifearaqhpWPPRVAtpHwpliYagalegldhlelartvdaaaq 277  
 ident | | | | |  
 Sbjct vagEPLP--VDSEQ-----difDYIQWR----- 317  
 DSSP 1111LLL--LLLH-----hhhHLLL-----

DSSP hhhhhhhhh1111  
 Query avqrfvaridratkr 292  
 ident | | | | |  
 Sbjct -----yrepkdrs 325  
 DSSP -----111hhh11

No 198: Query=mol1A Sbjct=4pgxA Z-score=6.8

[back to top](#)

DSSP -----1111111111hh  
 Query -----aapyspntlr 12  
 ident | | | | |  
 Sbjct aekideflatgklrklekirqdtssinfltrvsgigpsaarkfvdegiktledlrkne 120  
 DSSP hhhhhhhhh111hhhhhhhh1hhhhhhhh111111hhhhhhhh1111hhhh11h

DSSP -----1111111111hh  
 Query -----aapyspntlr 12  
 ident | | | | |  
 Sbjct aekideflatgklrklekirqdtssinfltrvsgigpsaarkfvdegiktledlrkne 120  
 DSSP hhhhhhhhh111hhhhhhhh1hhhhhhhh111111hhhhhhhh1111hhhh11h

DSSP hhhhhhhhh1111hhhhHHHHHHHHHHHH-LLLL1111LLEEEHHHHHHhh11  
 Query slrdrltqvaerqgvfgrlqRHVAXIVVAQFAA-TLTDdtGAPLLLKGGSSLELrrgi 71  
 ident | | | | |  
 Sbjct dklnhhqriglkyfgdfekriPREEMLMQDIVLnEVKkVdSEYIATVCGSFRGA---- 176  
 DSSP hhl1hhhhhhhh1hhhh11eEHhhHHHHHHHHHHHHhh1LLEEEELHHHHLLL----

DSSP 1111LLLLEEEEEL-----1LHHHHHHHHHHHHhh1111eeEEEELLEEL1111  
 Query pdsrTSKDFATVAR-----rDIELIHEQLADAGetgwegftAIFTAPEEiaap 119  
 ident | | | | |  
 Sbjct ---eSSGDMDVLLThpsftsestqpkLLHQVVEQLQKVH-----FITDTLSK---- 221  
 DSSP ---1EELLEEEL1111111111hHHHHHHHHHHLL-----LEEEEEEL---

DSSP 1111LLEEEEEEEEL--LEEEEEEEEEEEL-LLLL1111eeeee1hhh11111eee  
 Query gxpVKPRRFTAKLSYR--GRAFATVPIEVSSV-EAGNadqfdtltaldglvqvpaavav 176  
 ident | | | | |  
 Sbjct --gETKFMGVCQLPSKndEKEYPHRRIDIRLlpKDQY----- 256  
 DSSP --1LLEEEEEELLLL1111111111LLEEEEEEEEL1HHHH-----

DSSP eellhHHHHhhhhhh1111111111HHHH-----hhhhhhh  
 Query pcxtiPWQIaqklhavtavleekandraHDLV-----dlqllegl 217  
 ident | | | | |

```

DSSP  ---hHHHH-----hhhLHHHHhhhhhhhhhhleeellleeelllll

DSSP  1lhHHHHhhHHHHhhhhhh111LLLLL11111hhhhhhhh111111111hhhhhh
Query  1ldADLXPTrSACIaifearaqhPWPPRVatlpwplyagalegldhlelartvdaaaq 277
ident  |
Sbjct  vagEPLPV--DSEK----difdYIQWKY----- 318
DSSP  111LLLLL--LLHH----hhhHLLLLL-----

DSSP  hhhhhhhhh1111
Query  avqrfvaridratkr 292
ident  |
Sbjct  -----repkdrse 326
DSSP  -----1lhhh111

```

No 199: Query=mol1A Sbjct=4ubbA Z-score=6.8

[back to top](#)

```

DSSP  -----
Query  ----- 0
ident  |
Sbjct  tlnggitdmltelanfeknvsqaihkynayrkaasviakyphkiksgaeakklpgvgtki 60
DSSP  111hhhhhhhhhhhhhh111hhhhhhhhhhhhhhhh111111hhhh11111hh

DSSP  -----111111111hh
Query  -----aapyspptnlr 12
ident  |
Sbjct  aekideflatgklrklekirqddtssinfltrvsgigpsaarkfvdegiktledlrkne 120
DSSP  hhhhhhhhh111hhhhhhhhhhhhhhhh111111hhhhhhhh11111hhhhhh1h

DSSP  hhhhhhhhhhh1111hhhhHHHHHHHHHHHHH-LLLL111LLEEEHHHHHHHHhh11
Query  slrdrltqvaerqgvfgrlqRHXIVVAQFAA-TLTDdtGAPLLLVKGSSELELrgi 71
ident  | |
Sbjct  dklnhhqriglkyfgdfekriPREEMLMQDIVLnEVKKvdSEYIATVCGSFRRGA---- 176
DSSP  hhl1hhhhhhhh1hhhh11eEHHHHHHHHHHHHHHHHH1LLEEEELHHHHLLL----

DSSP  1111LLEEEEEEEL-----1LHHHHHHHHHHHHhh111leeEEELLEE1111
Query  pdsrTSKFATVAR-----rDIELIHEQLADAGetgwegftAIFTAPEEiaap 119
ident  | | | |
Sbjct  ---eSSGDMDVLLThpsftsestkqpkLLHQVVEQLQKVH-----FITDTLSK---- 221
DSSP  ---1EELLEEEEEE1111111111111111HHHHHHHHHHHLL-----LEEEEEE----

DSSP  111LLEEEEEEEL--LEEEEEEEL-LLLL1111eeehhh1111lee
Query  gxpVKPRRFTAKLSYR--GRAFATVPIEVSSV-EAGNadqfdtlttsdalglvgvpaav 176
ident  | |
Sbjct  --gETKFMGVCQLPSKndEKEYPHRRIDIRLIpKDQY----- 256
DSSP  --1LLEEEEEEELLLL11LLLLLLEEEEEEEL1HHHH-----

DSSP  eel1hhHHHHhhhhhh1111111111HHHH-----hhhhhhh
Query  pcxtiPWQIaqk1havtavleepkandraHDLV-----dlqllegl 217
ident  |
Sbjct  ---yCGVL-----yftgSDIFnknmrahalekgftineytirplgvtg 296
DSSP  ---hHHHH-----hhhLHHHHhhhhhhhhhhleeellleeelllll

DSSP  1lhHHHHhhHHHHhhhhhh111LLLLL11111hhhhhhhh111111111hhhhhh
Query  1ldADLXPTrSACIaifearaqhPWPPRVatlpwplyagalegldhlelartvdaaaq 277
ident  |
Sbjct  vagEPLPV--DSEK----difdYIQWKY----- 318
DSSP  111LLLLL--LLHH----hhhHLLLLL-----

DSSP  hhhhhhhhh1111
Query  avqrfvaridratkr 292
ident  |
Sbjct  -----repkdrse 326
DSSP  -----1lhhh111

```



[back to top](#)

```
DSSP -----
Query ----- 0
ident
Sbjct tlnggitdmltelanfeknvsqaihkynayrkaasviakyphkiksgaeakklpgvgtki 60
DSSP 111hhhhhhhhhhhhhhhhhh1111hhhhhhhhhhhhhhhh1111111hhhhhh11111hh
```

```
DSSP -----111111111hh
Query -----aapysspptnlr 12
ident
Sbjct aekideflatgklrklekirqddtssinfltrvsgigpsaarkfvdegiktledlrkne 120
DSSP hhhhhhhhhhh111hhhhhhhhhhhhhhhhhh111111hhhhhhhhhh11111hhhhhhhh
```

```
DSSP hhhhhhhhhhh111hhhhhhHHHHHHHHHHHHH-LLLL111LLEEEHHHHHHHHhh11
Query slrdrltqvaerqgvvfgrlqRHXVAXIVVAQFAA-TLTDdtGAPLLLVKGGSSLELrrgi 71
ident |
Sbjct dklnhhqriglkyfgdfekriPREEMLQMQDIVLnEVKKvdSEYIATVCGSFRGA---- 176
DSSP hh11hhhhhhhh11hhhhhh11eHHHHHHHHHHHHHHHHHH11LLEEEELHHHHLLL----
```

```
DSSP 1111LLEEEEEEEL-----1LHHHHHHHHHHHHHHhh1111eeEEELLLEE1111
Query pdsrTSKDFATVAR-----rDIELIHEQLADAGetgwegftAIFTAPEEiaap 119
ident |
Sbjct ---eSSGDMDVLLThpsftsestqpkLLHQVVEQLQKVH-----FITDTLSK---- 221
DSSP ---1EELLEEEEEE1111111111111111HHHHHHHHHHHLL-----LEEEEEE----
```

```
DSSP 111LLEEEEEEEL--LEEEEEEEL-LLLL1111eeee1hhhh11111lee
Query gxpVKPRRFTAKLSYR--GRAFATVPIEVSSV-EAGNadqfdtltaldglvgvpaavav 176
ident |
Sbjct --gETKFMGVCQLPSKndeEKEYPHRRIDIRLlpKDQY----- 256
DSSP --1LLEEEEEE1111111111111111LLEEEEEEEL1HHHH-----
```

```
DSSP ee11hHHHHhhhhhhhh111111111111HHHH-----hhhhhhhh
Query pcxtiPWQIaqklhavtavleepkandraHDLV-----dlqllegl 217
ident |
Sbjct ----yCGVL-----yftgSDIFnknmrahalekgftineytirplgvtg 296
DSSP ----hHHHH-----hhh1LHHHHhhhhhhhhhh11ee1111eee11111
```

```
DSSP 11hHHHHhhHHHHhhhhhh1111L1111hhhhhhhh1111111111hhhhhh
Query 1ldADLXPtrSACIaifearaqhPWPPRVatlpwpliyagalegldhlelartvdaaaq 277
ident |
Sbjct vagEPLPV--DSEK----difdYIQWKY----- 318
DSSP 1111L1111--L1111--hhhhH11111-----
```

```
DSSP hhhhhhhhhhh1111
Query avqrfvaridratkr 292
ident
Sbjct -----repkdrse 326
DSSP -----11hhhh111
```

No 201: Query=mol1A Sbjct=7iceA Z-score=6.8

[back to top](#)

```
DSSP -----
Query ----- 0
ident
Sbjct etlnggitdmltelanfeknvsqaihkynayrkaasviakyphkiksgaeakklpgvgtk 60
DSSP 1111hhhhhhhhhhhhhhhhhh1111hhhhhhhhhhhhhhhh1111111hhhhhh11111hh
```

```
DSSP -----111111111hh
Query -----aapysspptnlr 11
ident
Sbjct iaekideflatgklrklekirqddtssinfltrvsgigpsaarkfvdegiktledlrkn 120
DSSP hhhhhhhhhhh111hhhhhhhhhhhhhhhhhh111111hhhhhhhhhh11111hhhhhhhh
```

DSSP hhhhhhhhhhhhhhh1111hhhhhhHHHHHHHHHHHHHH-LLLL11LLLLEEEHHHHHHHHhh1  
 Query rslrdrltqvaerqgvfgrlqRHVAXIVVAQFAA-TLTDdtGAPLLLKGGSSLELrrg 70  
 ident | |  
 Sbjct edklnhhqriglkyfgdfekriPREEMLQMQRDIVLnEVKKvdSEYIATVCGSFRRGA--- 177  
 DSSP hhh11hhhhhhhhhh11eEHHHHHHHHHHHHHHHHHHh1LLEEEELHHHHLL---

DSSP 1111LLLLEEEEL-----1LHHHHHHHHHHHHhh1111eEEELLEEL11  
 Query ipdsrTSKDFATVAR-----rDIELIHEQLADAGetgwegftAIFTAPEEiaa 118  
 ident | | | | |  
 Sbjct ----eSSGDMVLLThpsftsestqpkLLHQVVEQLQKVH-----FITDTLSKG-- 223  
 DSSP ----1EELLEEEEEEe1111111111hhHHHHHHHHHHLL-----LEEEEEEEL--

DSSP 1111LLLLEEEEEEEL--EEEEEEEEEEEL-LLLL1111eEEEEhhhh1111lee  
 Query pgxpVKPRRFTAKLSYRG--RAFATVPIEVSSV-EAGNadqfdtlttsdalglvgpaava 175  
 ident | | |  
 Sbjct ----ETKFMGVCQLPSKNdeKEYPHRRIDIRLIpKDQY----- 257  
 DSSP ----LLEEEEEEELLLLL11LLLLEEEEEEeHHHH-----

DSSP eeellhHHHHHHhhhhhh11111111111hhhhHHHHHH-----  
 Query vpcxtiPWQIAQklhavtavleekandrahdldvDLQLE----- 215  
 ident |  
 Sbjct ----yCGVLYF-----tgSDIFNKmrahalekgftineytirp 292  
 DSSP ----hHHHHHH-----h1LHHHHHHhhhhhhhh1leeelllee

DSSP --hh11hhhhhhhhHHHHhhhhhh1111LLL11111hhhhhhhh111111111hh  
 Query --gllldadlxptrSACIaifearaqhpWPPRVatlpwpliayagalegldhlelartvd 273  
 ident |  
 Sbjct lgvtgvagelplvdSEKD-----ifdYIQWK----- 318  
 DSSP 1111111111111LHHH-----hhhHLLL-----

DSSP hhhhhhhhhhhhhhh1111  
 Query aaaqavqrfvaridratkr 292  
 ident |  
 Sbjct -----yrepkdrse 327  
 DSSP -----111hhhh111

No 202: Query=mol1A Sbjct=4r64A Z-score=6.8

[back to top](#)

DSSP -----  
 Query ----- 0  
 ident |  
 Sbjct tlnggitdmltelanfeknvsqaihkynayrkaasviakyphkiksgaeakklpgvgtki 60  
 DSSP 111hhhhhhhhhhhhhh1111hhhhhhhhhhhhhh111111hhhh11111hh

DSSP -----111111111hh  
 Query -----aapyspntlr 12  
 ident |  
 Sbjct aekideflatgklrklekirqdtssinfltrvsgigpsaarkfvdegiktledlrkne 120  
 DSSP hhhhhhhhhhh111hhhhhhhh1hhhhhhhh111111hhhhhhhh1111hhhh11h

DSSP hhhhhhhhhhh1111hhhhHHHHHHHHHHHH-LLLL11LLLLEEEHHHHHHHHhh11  
 Query slrdrltqvaerqgvfgrlqRHVAXIVVAQFAA-TLTDdtGAPLLLKGGSSLELrrgi 71  
 ident | |  
 Sbjct dklnhhqriglkyfgdfekriPREEMLQMQRDIVLnEVKKvdSEYIATVCGSFRRGA--- 176  
 DSSP hh11hhhhhhhh11hhhh11eEHHHHHHHHHHHHHHHHHHh1LLEEEELHHHHLL---

DSSP 1111LLLLEEEEL-----1LHHHHHHHHHHHHhh1111eEEELLEEL1111  
 Query pdsrTSKDFATVAR-----rDIELIHEQLADAGetgwegftAIFTAPEEiaap 119  
 ident | | | | |  
 Sbjct ---eSSGDMVLLThpsftsestqpkLLHQVVEQLQKVH-----FITDTLSK--- 221  
 DSSP ---1EELLEEEEEE111111111111HHHHHHHHHHLL-----LEEEEEE---

DSSP 111LLLLEEEEEEEL--EEEEEEEEEEEL-LLLL1111eEEEEhhhh1111lee  
 Query gxpVKPRRFTAKLSYRG--RAFATVPIEVSSV-EAGNadqfdtlttsdalglvgpaavav 176  
 ident | |

DSSP --1LLEEEEEELLLLLL11LLLLLEEEEEEL1HHHH-----

DSSP ee11hHHHHhhhhhhhh111111111111HHHH-----hhhhhhh  
Query pcxtiPWQIaqklhavtavleekandraHDLV-----dlqllegl 217  
ident |  
Sbjct ----yCGVL-----yftgSDIFnknmrahalekgftinkytirplgvtg 296  
DSSP ----hHHHH-----hhh1LHHHHhhhhhhhhhh1lee1111ee1111

DSSP 11hhHHHHhhHHHHhhhh111LLLLL11111hhhhhhhh1111111111hhhhhh  
Query l1daDLXPTrSACIAifearaqhPWPPRvatlphwpliyagalegldhlelartvdaaaq 277  
ident |  
Sbjct vagePLPV--DSEKD----ifdYIQWK----- 317  
DSSP 1111LLLL--LHHH-----hhhHLLL-----

DSSP hhhhhhhhh1111  
Query avqrfvaridratkr 292  
ident  
Sbjct -----yrepkdrse 326  
DSSP -----111hh111

No 203: Query=mol1A Sbjct=4ymmA Z-score=6.8

[back to top](#)

DSSP -----  
Query ----- 0  
ident  
Sbjct pqetlnggitdmltelanfeknvsqaihkyayrkaasviakyphkiksgaeakklpgvg 60  
DSSP 11hhhhhhhhhhhhhhhhhh1111hhhhhhhhhhhhhh11111111hhhh111111

DSSP -----11111111  
Query -----aapysppt 9  
ident  
Sbjct tkiaekideflatgklrklekirqddtssinfltrvsgigpsaarkfvdegiktledlr 120  
DSSP hhhhhhhhhhh111hhhhhhhhhhhhhhhh11111111hhhhhhhh1111hhhh

DSSP 1hhhhhhhhhhhh1111hhhhHHHHHHHHHHHH--LLLL11LLLLEEEEHHHHHHHH  
Query nlrslrdrltqvaerqgvfgrlqRHVAXIVVAQFAA-TLTDdtGAPLLLVKGGSSLELr 68  
ident | |  
Sbjct knedklnhhqriglkyfgdfekriPREEMLMQMDIVLnEVKKvdSEYIATVCGSFRRGA- 179  
DSSP hlhhh11hhhhhhhh11hhhh11eEHHHHHHHHHHHHHHHH1LLEEEELHHHHLLL-

DSSP h11111111LLEEEEEEL-----1LHHHHHHHHHHHHhh1111eeEEELLLEE111  
Query rgipdsrTSKDFATVAR-----rDIELIHEQLADAGetgwegftAIFTAPEEiaa 118  
ident | | | |  
Sbjct -----eSSGDMVDVLLThpsftsesqpkLLHQVVEQLQKVH-----FITDTLSK--- 222  
DSSP -----1EELLEEEEE1111111111HHHHHHHHHHLL-----LEEEEEEE---

DSSP 1111LLEEEEEEEEEEL--LEEEEEEEEEEL--LLLL1111eeeee1hhhh11111ee  
Query pgxpVKPRRFTAKLSYR--GRAFATVPIEVSSV-EAGNadqfdtltsdalglvgvpaava 175  
ident | |  
Sbjct ---gETKFMGVCQLPSKndeKEYPHRRIDIRLIpKDQY----- 257  
DSSP ---1LLEEEEEELLLLL11LLLLLEEEEEEL1HHHH-----

DSSP ee11hHHHHhhhhhh111111111111HHHH-----hhhhhhh  
Query vpcxtiPWQIaqklhavtavleekandraHDLV-----dlqlleg 216  
ident |  
Sbjct ----yCGVL-----yftgSDIFnknmrahalekgftineytirplgvt 296  
DSSP ----hHHHH-----h111LHHHHhhhhhhhh11lee1111ee1111

DSSP h11hhHHHHhhHHHHhhhh111LLLLL11111hhhhhhhh1111111111hhhh  
Query l11daDLXPTrSACIAifearaqhPWPPRvatlphwpliyagalegldhlelartvdaaa 276  
ident |  
Sbjct gvagePLPV--DSEKD----ifdYIQWK----- 318  
DSSP 1111LLLL--LHHH-----hhhHLLL-----



DSSP hhhhhhhhhhh1111hhhhHHHHHHHHHHHH-LLLL11LLLLEEEEHHHHHHhh11  
 Query slrdrltqvaerqgvfgrlqRHVAXIVVAQFAA-TLTDdtGAPLLLKGGSSLELrgi 71  
 ident | |  
 Sbjct dklnhhqriglkyfgdfekriPREEMLQMQDIVLnEVKkvdSEYIATVCGSFRRGA---- 176  
 DSSP hhl1hhhhhhhh11hhhh1leEHHHHHHHHHHHHHHHHHh1LLEEEELHHHLLL----

DSSP 1111LLLLEEEEEL-----1LHHHHHHHHHHHHhh1111eeEELLEE1111  
 Query pdsrTSKDFATVAR-----rDIELIHEQLADAGetgwegftAIFTAPEEiaap 119  
 ident | | | | |  
 Sbjct ---eSSGMDVLLThpsftsestqpkLLHQVVEQLQKVH-----FITDTLSK---- 221  
 DSSP ---1EELLEEEL111111111111HHHHHHHHHHLLL-----LEEEEEE----

DSSP 1111LLLLEEEEEL--LEEEEEEEEEEL-LLLL1111eeeee1hhhh11111lee  
 Query gxpVKPRRFTAKLSYR--GRAFATVPIEVSSV-EAGNadqfdtlttsdalglvgvpaavav 176  
 ident | | | | |  
 Sbjct --gETKFMGVCQLPSKndEKEYPHRRIDIRLIpKDQY----- 256  
 DSSP --1LEEEELLLL111111111111HHHHHHHHHHLLL-----LEEEEEE----

DSSP eellhHHHHhhhhhh111111111111HHHH-----hhhhhhh  
 Query pcxtiPWQIaqklhavtavleekandraHDLV-----dlqllegl 217  
 ident | | | | |  
 Sbjct ----yCGVL-----yftgSDIFnknmrahalekgftineytirplgvtg 296  
 DSSP ----hHHHH-----hhl1LHHHHhhhhhhhh1leeel1111eeel1111

DSSP 11hHHHHhhHHHHhhhhhh111111111111hhhhhhhh111111111111hhhhhh  
 Query lldADLXPTrSACIaifearaqhWPPRVatlpwplyagaleglhdhlelartvdaaaq 277  
 ident | | | | |  
 Sbjct vagEPLPV--DSEK----difdYIQWKY----- 318  
 DSSP 11111111--LLHH-----hhhhHLLL

DSSP hhhhhhhhhhh1111  
 Query avqrfvaridratkr 292  
 ident | | | | |  
 Sbjct -----repkdrse 326  
 DSSP -----11hhhh111

No 206: Query=mol1A Sbjct=5j2bA Z-score=6.8

[back to top](#)

DSSP -----  
 Query ----- 0  
 ident | | | | |  
 Sbjct tlnggitdmltelanfeknvsqaihknayrkaasviakyphkiksgaeakklpgvgtki 60  
 DSSP 1111hhhhhhhhhhhhhh1111hhhhhhhhhhhhhh111111hhhhhh1111hh

DSSP -----1111111111hh  
 Query -----aapyspptnlr 12  
 ident | | | | |  
 Sbjct aekideflatgklrklekirqddtssinfltrvsgigpsaarkfvdegiktledlrkne 120  
 DSSP hhhhhhhhh111hhhhhhhh1hhhhhhhh111111hhhhhhhh1111hhhhhh1h

DSSP hhhhhhhhhhh1111hhhhHHHHHHHHHHHH-LLLL11LLLLEEEEHHHHHHhh11  
 Query slrdrltqvaerqgvfgrlqRHVAXIVVAQFAA-TLTDdtGAPLLLKGGSSLELrgi 71  
 ident | |  
 Sbjct dklnhhqriglkyfgdfekriPREEMLQMQDIVLnEVKkvdSEYIATVCGSFRRGA---- 176  
 DSSP hhl1hhhhhhhh11hhhh1leEHHHHHHHHHHHHHHHHHh1LLEEEELHHHLLL----

DSSP 1111LLLLEEEEEL-----1LHHHHHHHHHHHHhh1111eeEELLEE1111  
 Query pdsrTSKDFATVAR-----rDIELIHEQLADAGetgwegftAIFTAPEEiaap 119  
 ident | | | | |  
 Sbjct ---eSSGMDVLLThpsftsestqpkLLHQVVEQLQKVH-----FITDTLSK---- 221  
 DSSP ---1EELLEEEL111111111111HHHHHHHHHHLLL-----LEEEEEE----

DSSP 1111LLLLEEEEEL--LEEEEEEEEEEL-LLLL1111eeeee1hhhh11111lee  
 Query gxpVKPRRFTAKLSYR--GRAFATVPIEVSSV-EAGNadqfdtlttsdalglvgvpaavav 176

Sbjct --gETKFMGVCQLPSKndEKEYPHRRIDIRLIpKDQY----- 256  
DSSP --1LLEEEEEELLLLL1LLLLLLEEEEEEL1HHHH-----

DSSP eellhHHHHhhhhhhhh111111111111HHHH-----hhhhhhh  
Query pcxtiPWQIaqlhavtavleepkandraHDLV-----dlqllegl 217  
ident |  
Sbjct ---yCGVL-----yftgSDIFnknmrahalekgftineytirplgvtg 296  
DSSP ---hHHHH-----hhhlHHHHhhhhhhhhhhleeell11leeell1111

DSSP 1lhHHHHhhHHHHhhhhhh1111LLLLL11111hhhhhhhh1111111111hhhhhh  
Query 1ldADLXPTrSACIaifearaqhPWPPRVatlpwpliyagalegldhlelartvdaaaq 277  
ident |  
Sbjct vagEPLPV--DSEK----difdYIQWKY----- 318  
DSSP 111LLLL--LLHH----hhhhHLLLL-----

DSSP hhhhhhhhhhh1111  
Query avqrfvaridratkr 292  
ident |  
Sbjct -----repkdrse 326  
DSSP -----11hhhh11

No 207: Query=mol1A Sbjct=4mf2A Z-score=6.8

[back to top](#)

DSSP ----- 0  
Query -----  
ident |  
Sbjct lnggitdmltelanfeknvsqaihknayrkaasviakypkiksgaeakklpgvgtkia 60  
DSSP 11hhhhhhhhhhhhhh1111hhhhhhhhhhhhhh111111hhhh11111hhhh

DSSP -----111111111hhh  
Query -----aapyspntlrs 13  
ident |  
Sbjct ekideflatgklrklekirqddtssinfltrvsgigpsaarkfvdegiktledlrkned 120  
DSSP hhhhhhhhh111hhhhhhhh11hhhhhhhh111111hhhhhhhh1111hhhhhh1hh

DSSP hhhhhhhhhhh1111hHHHHHHHHHHHHHHHLL-LLLLLLLEEEHHHHHHHHhh111  
Query ldr1ltqvaerqgvfGRLQRHVXIVVAQFAAT-LTDDTGAPLLLVKGGSSLELrrgip 72  
ident | |  
Sbjct klnhhqriglkyfgdfEKRIPREEMLQMQDIVLNeVKKVDSEYIATVCGSFRRGA----- 175  
DSSP h11hhhhhhhh11hhhhLLEEHHHHHHHHHHHHHHHHLLLEEEELHHHHLLL-----

DSSP 111LLLLLEEEEL-----1LHHHHHHHHHHHHhh1111eeEEELLEEL11111LL  
Query dsrTSKDFATVAR-----rDIELIHEQLADAGetgwegftAIFTAPEElaapgxpvK 124  
ident | | | |  
Sbjct --eSSGDMVLLThpsftsepkLLHQVVEQLQKVH-----FITDTLSKG-----ET 219  
DSSP --1EELLEEEEEE11111111HHHHHHHHHHHLL-----LEEEEEEEL-----LL

DSSP LEEEEEEEEEL--LEEEEEEEEEEL-LLLL1111eeee1hhhh11111eeee1lh  
Query PRRFTAKLSYR--GRAFATVPIEVSSV-EAGNadqfdt1tsdalglvgvpaavavpcxti 181  
ident | |  
Sbjct KFMGVCQLPSKndEKEYPHRRIDIRLIpKDQY-----y 252  
DSSP EEEEEELLLLL1LLLLLLEEEEEEL1HHHH-----h

DSSP HHHHHhhhhhh1111111111hhhhHHHHHH-----hh11  
Query PWQIaqlhavtavleepkandrahd1vDLQLE-----g111 219  
ident |  
Sbjct CGVL-----yftgSDIFNknmrahalekgftineytirplgvtgv 292  
DSSP HHHH-----hhhlHHHHhhhhhhhhhhleeell11leeell1111

DSSP hhhhhhhHHHHhhhhhh1111LLLLL1111hhhhhhhh1111111111hhhhhhhh  
Query dadlxptrSACIaifearaqhPWPPRVatlpwpliyagalegldhlelartvdaaaqav 279  
ident |  
Sbjct ageplpvdSEKD-----ifdYIQWK----- 312  
DSSP 11111111LHHH-----hhhhL-----

DSSP hhhhhhhhh1111  
Query qrfvaridratkr 292  
ident  
Sbjct ----yrepkdrse 321  
DSSP ----111hhhh11

No 208: Query=mol1A Sbjct=5cr0A Z-score=6.8

[back to top](#)

DSSP -----111111111hhhhhhhhhhhhhh1111hHHHHHH  
Query -----aapyspptnlrsldrldtqvaerqgvvfGRLQRH 35  
ident  
Sbjct esvpvlelfsniwgagtktaqmwyqqgfrsleldirsqaslttqqaiglkhysdfLERMPR 60  
DSSP 1hhhhhhhhhh111111hhhhhhhhhh11111hhhhhhhh1111hhhhhhhhhhhhLLEEh

DSSP HHHHHHHHHHLL-LLLLLLEEEEEHHHHHHHHhh111111LLEEEEEEL-----1  
Query VAXIVVAQFAATL-TDDTGAPLLLKGGSSLELrrgipdsrTSKDFATVAR-----r 86  
ident  
Sbjct EEATEIEQTVQKAaQAFNSGLLCVACGSYRRGK-----aTCGDVDVAIThpdgrshrg 113  
DSSP HHHHHHHHHHHHHHHHLLLEEEEEHHHHHLL-----1EELLEEEEE111111111

DSSP LHHHHHHHHHHHHhh1111eeEEELLEELL11LLEEEEEEEEE11EEEEEEEE  
Query DIELIHEQLADAGetgwegftAIFTAPEEIAApGXPVKPRRFTAKLSYrgRAFATVPIEV 146  
ident  
Sbjct IFSRLDLSLRQEG-----FLTDDLVSQEE-nGQQQKYLGVCRPLG--PGRRHRRLDI 162  
DSSP HHHHHHHHHHHHLL-----LEEEEEEEEE-eLLEEEEEEEELLLL--LLLLLEEEEE

DSSP EEL-LLLL1111eeeee1hhhh111111eeeee1hHHHHhhhhhhhh1111111111  
Query SSV-EAGNadqfdlttsdalglvgvpaavavpcxtiPWQIaqklhavtavleekandra 205  
ident  
Sbjct IVVpYSEF-----aCALL-----yftg 179  
DSSP EEL1LLLH-----hHHHH-----hhh1

DSSP HHHHHHH-----hhhh11hhhhhhHHHHHHhhhhhh1111L  
Query HDLVDLQ-----lleg111dadlxptRSACIaifearaqhpW 242  
ident  
Sbjct SAHFNRSmralaktkgmslsehalstavvrnthgckvpggrvlpTPTEK-----dvfR 232  
DSSP LHHHHHHhhhhhhhh111ee1111ee1111111111111111ee1LLLHH-----hhh

DSSP LLLL1111hhhhhhhhhh1111111111hhhhhhhhhhhhhhhh1111  
Query PPRVAtlphwpliyagalegldhlelartvdaaaqavqrfvaridratkr 292  
ident  
Sbjct LLGLP-----yrepaerdw 246  
DSSP HLLL-----111hhhh11

No 209: Query=mol1A Sbjct=5cp2B Z-score=6.8

[back to top](#)

DSSP -----111111111hhhhhhhhhhhhhh1111hHHHHHH  
Query -----aapyspptnlrsldrldtqvaerqgvvfGRLQRH 35  
ident  
Sbjct esvpvlelfsniwgagtktaqmwyqqgfrsleldirsqaslttqqaiglkhysdfLERMPR 60  
DSSP 1hhhhhhhhhh111111hhhhhhhhhh11111hhhhhhhh1111hhhhhhhhhhhhHLEEh

DSSP HHHHHHHHHHLL-LLLLLLEEEEEHHHHHHHHhh111111LLEEEEEEL-----1  
Query VAXIVVAQFAATL-TDDTGAPLLLKGGSSLELrrgipdsrTSKDFATVAR-----r 86  
ident  
Sbjct EEATEIEQTVQKAaQAFNSGLLCVACGSYRRGK-----aTCGDVDVAIThpdgrshrg 113  
DSSP HHHHHHHHHHHHHHHHLLLEEEELHHHHLL-----1EELLEEEEE111111111

DSSP LHHHHHHHHHHHHhh1111eeEEELLEELL11LLEEEEEEEEE11EEEEEEEE  
Query DIELIHEQLADAGetgwegftAIFTAPEEIAApGXPVKPRRFTAKLSYrgRAFATVPIEV 146  
ident  
Sbjct IFSRLDLSLRQEG-----FLTDDLVSQEE-nGQQQKYLGVCRPLG--PGRRHRRLDI 162







DSSP hhhhhhhhhhh1111hhhhHHHHHHHHHHHH-LLLL11LLLLEEEHHHHHHhh11  
Query slrdrltqvaerqgvfgrlqRHVAXIVVAQFAA-TLTDdtGAPLLLKGGSSLELrrgi 71  
ident | |  
Sbjct dklnhhqriglkyfgdfekriPREEMLQMQDIVLnEVKKvdSEYIATVCGSFRRGA---- 176  
DSSP hhl1hhhhhhhh1hhhh11eHHHHHHHHHHHHHHHHH11LLEEEELHHHHLLL----

DSSP 1111LLLLEEEEL-----1LHHHHHHHHHHHHhh1111eeEEELLEE1111  
Query pdsrTSKDFATVAR-----rDIELIHEQLADAGetgwegftAIFTAPEEiaap 119  
ident | | | | |  
Sbjct ---eSSGDMVDLLThpsftsestkqpkLLHQVVEQLQKVH-----FITDTLSK---- 221  
DSSP ---1EELLEEEEEE1111111111111111HHHHHHHHHHLL-----LEEEEEE----

DSSP 1111LLLLEEEEEEEL--LEEEEEEEL-LLLL1111eeeee1hhhh11111lee  
Query gxpVKPRRFTAKLSYR--GRAFATVPIEVSSV-EAGNadqfdtlttsdalglvgvpaavav 176  
ident | | | | |  
Sbjct --gETKFMGVCQLPSKndEKEYPHRRIDIRLlpKDQY----- 256  
DSSP --1LLEEEEEE1111111111111111HHHHHHHHHH-----

DSSP eellHHHHhhhhhh1111111111HHHH-----hhhhhhhh  
Query pcxtiPWQIaqklhavtavlepkandraHDLV-----dlqllegl 217  
ident | | | | |  
Sbjct ---yCGVL-----yftgSDIFnknmrahalekgftineytirplgvtg 296  
DSSP ---hHHHH-----hhh1LHHHHhhhhhhhh1lee1111ee1111

DSSP 11hHHHHhhHHHHhhhh1111111111hhhhhhhh1111111111hhhhhh  
Query 1ldADLXPtrSACIaifearaqhWPPRvatlphwpliyagaleglhdhlarvdaaaq 277  
ident | | | | |  
Sbjct vagEPLPV--DSEK----difdYIQWK----- 317  
DSSP 11111111--LLHH-----hhhh111111

DSSP hhhhhhhhh1111  
Query avqravaridratkr 292  
ident | | | | |  
Sbjct -----yrepkdrse 326  
DSSP -----111hhhh11

No 213: Query=mol1A Sbjct=4rpyA Z-score=6.7

[back to top](#)

DSSP -----  
Query ----- 0  
ident | | | | |  
Sbjct tlnggitdmltelanfeknvsqaihkynayrkaasviakyphkiksgaeakklpgvgtki 60  
DSSP 111hhhhhhhhhhhhhh1111hhhhhhhhhhhhhh111111hhhh11111hh

DSSP -----111111111hh  
Query -----aapyspntlr 12  
ident | | | | |  
Sbjct aekideflatgklrklekirqddtssinfltrvsgigpsaarkfvdegiktledlrkne 120  
DSSP hhhhhhhhh111hhhhhhhh1hhhhhhhh111111hhhhhhhh1111hhhhhhhh

DSSP hhhhhhhhhhh1111hhhhHHHHHHHHHHHH-LLLL11LLLLEEEHHHHHHhh11  
Query slrdrltqvaerqgvfgrlqRHVAXIVVAQFAA-TLTDdtGAPLLLKGGSSLELrrgi 71  
ident | | | | |  
Sbjct dklnhhqriglkyfgdfekriPREEMLQMQDIVLnEVKKvdSEYIATVCGSFRRGA---- 176  
DSSP hhl1hhhhhhhh1hhhh11eHHHHHHHHHHHHHHHHH11LLEEEELHHHHLLL----

DSSP 1111LLLLEEEEL-----1LHHHHHHHHHHHHhh1111eeEEELLEE1111  
Query pdsRTSKDFATVAR-----rDIELIHEQLADAGetgwegftAIFTAPEEiaap 119  
ident | | | | |  
Sbjct ---ESSGDMVDLLThpsftsestkqpkLLHQVVEQLQKVH-----FITDTLSK---- 221  
DSSP ---LEELLEEEEEE1111111111111111HHHHHHHHHHLL-----LEEEEEE----

DSSP 1111LLLLEEEEEEEL--1EeeeeeeeeEL-LLLL1111eeeee1hhhh11111lee  
Query gxpVKPRRFTAKLSYR--GRAFATVPIEVSSV-EAGNadqfdtlttsdalglvgvpaavav 176  
ident | | | | |

DSSP --1LLEEEEEELLLLL111LLLLLEEEEEEL1HHHH-----

DSSP ee11hHHHHhhhhhhhh111111111111HHHH-----hhhhhhh  
Query pcxtiPWQIaqklhavtavleekandraHDLV-----dlqllegl 217  
ident |  
Sbjct ---yCGVL-----yftgSDIFnknmrahalekgftineytirplgvtg 296  
DSSP ---hHHHH-----hhh1LHHHHhhhhhhhhhh1leeel11leeel1111

DSSP 11hHHHHhhHHHHhhhhhh111LLLLL11111hhhhhhhh1111111111hhhhhh  
Query 11dADLXPTrSACIaifearaqhPWPPRVat1phwpliyagalegldhlelartvdaaaq 277  
ident |  
Sbjct vagEPLPV--DSEK----difdYIQWKY----- 318  
DSSP 111LLLLL--LLHH----hhhhHLLLL-----

DSSP hhhhhhhhh1111  
Query avqrfvaridratkr 292  
ident  
Sbjct -----repkdrse 326  
DSSP -----11hhhh11

No 214: Query=mol1A Sbjct=4rq0A Z-score=6.7

[back to top](#)

DSSP -----  
Query ----- 0  
ident  
Sbjct etlnggitdmltelanfeknvsqaihknayrkaasviakypkiksgaeakklpgvgtk 60  
DSSP 1111hhhhhhhhhhhhhh1111hhhhhhhhhhhhhh111111hhhh111111hh

DSSP -----1111111111h  
Query -----aapyspsptnl 11  
ident  
Sbjct iaekideflatgklrklekirqddtssinfltrvsgigpsaarkfvdegiktledlrkn 120  
DSSP hhhhhhhhh111hhhhhhhh1hhhhhhhh111111hhhhhhhh11111hhhhhh1

DSSP hhhhhhhhhhh1111hhhhHHHHHHHHHHHHH-LLLL11LLLEEEHHHHHHhh1  
Query rslrdrltqvaerqgvfgrlqRHVAXIVVAQFAA-TLTDdtGAPLLLVKGSSELELrrg 70  
ident | |  
Sbjct edklnhhqriglkygdfekriPREEMLQMQDIVLnEVKkvdSEYIATVCGSFRGA--- 177  
DSSP hhh11hhhhhhhh1hhhh11eEHHHHHHHHHHHHHHHHHH1LLEEEELHHHHLLL---

DSSP 1111LLLEEEEEEEL-----1LHHHHHHHHHHHHhh1111eeEEELLLEE111  
Query ipdsRTSKDFATVAR-----rDIELIHEQLADAGetgwegftAIFTAPEEiaa 118  
ident | | | |  
Sbjct ---ESSGDMDVLLThpsftsestkqpkLLHQVVEQLQKVH-----FITDTLSK--- 222  
DSSP ---LEELLEEEEEE111111111111HHHHHHHHHHHLL-----LEEEEEE---

DSSP 1111LLLEEEEEEEL--1EEEEEEEEEEEL-LLLL1111eeee1hhhh11111lee  
Query pgxpVKPRRFTAKLSYR--gRAFATVPIEVSSV-EAGNadqfdtltsdalglvgvpaava 175  
ident | |  
Sbjct ---gETKFMGVCQLPSKndeKEYPHRRIDIRLIpKDQY----- 257  
DSSP ---1LLEEEEEELLLLL111LLLLLEEEEEEL1HHHH-----

DSSP ee11hHHHHhhhhhhhh111111111111HHHH-----hhhhhhh  
Query vpcxtiPWQIaqklhavtavleekandraHDLV-----dlqlleg 216  
ident |  
Sbjct ---yCGVL-----yftgSDIFnknmrahalekgftineytirplgvt 296  
DSSP ---hHHHH-----hhh1LHHHHhhhhhhhhhh1leeel11leeel1111

DSSP h11hHHHHhhHHHHhhhhhh111LLLLL11111hhhhhhhh1111111111hhhh  
Query 111dADLXPTrSACIaifearaqhPWPPRVat1phwpliyagalegldhlelartvdaaa 276  
ident |  
Sbjct gvagEPLPV--DSEK----difdYIQWKY----- 319  
DSSP 1111LLLLL--LLHH----hhhhHLLLL-----



```

DSSP 1111LLLLLEEEEEEL-----LHHHHHHHHHHHHHh1111eeEEEELLEEL111
Query pdsrTSKDFATVAR-----rDIELIHEQLADAGetgwegftAIFTAPEE|Iaap 119
ident | | | |
Sbjct ---eSSGDMDVLLThpsftsestkqpkLLHQVVEQLQKVH-----FIDTTLSTGK--- 222
DSSP ---1EELLEEEEEEL1111111111111111HHHHHHHHHHHLL-----LEEEEEEEEL---

```

```

DSSP 111LLEEEEEEEEEEEL--LEEEEEEEEEEEL-LLLL1111eeeee1hhh11111lee
Query gxpVKPRRFTAklSYR--GRAFATVPIEVSSV-EAGNadqfdt|ttsdalglv|gvp|aaav 176
ident | |
Sbjct ---ETKFMGVCQLPSKndEKEYPHRRIDIRL|IpKDQY----- 256
DSSP ---LLEEEEEELLLL1111111111111111HHHH-----

```

```

DSSP ee11hHHHHhhhhhhhh111111111111HHHHHHHH-----hhhhh
Query pcxtiPWQ|Iaql|hav|tav|leep|kandra|HDLV|DLQ-----l|legl 217
ident |
Sbjct ----yCGVL-----yftgSDIFNK|N|mr|ahalek|gft|iney|tir|plgvtg 296
DSSP ----hHHHH-----hhh1LHHHHHHhhhhhh11lee1111lee11111

```

```

DSSP 11hHHHHhhHHHHhhhhhh111111111111hhhhhhhh111111111111hhhhhh
Query 1ldADLXptRSACIaifearaqhpWPPRVat|lphw|piyaga|legldh|elartv|daaaq 277
ident |
Sbjct vagEPLP--VDSEK-----difDYIQW----- 316
DSSP 11111111--LLLHH-----hhhhHLLL-----

```

```

DSSP hhhhhhhhhhh1111
Query avqrfvaridr|atkr 292
ident
Sbjct ----kyrepkdrse 326
DSSP ----1111hh111

```

No 217: Query=mol1A Sbjct=3isdA Z-score=6.7

[back to top](#)

```

DSSP -----
Query ----- 0
ident
Sbjct tlnggitdmltelanfeknvsqaihkynayrkaasviakyphkiksgaeakklpgvgtki 60
DSSP 111hhhhhhhhhhhhhhhh1111hhhhhhhhhhhhhh11111111hhhh111111hhhh

```

```

DSSP -----111111111hh
Query -----aapysp|ptn|lr 12
ident
Sbjct aekideflatgklrklekirqddtssinfltrvsgigpsaarkfvddegiktledlrkne 120
DSSP hhhhhhhhh111hhhhhhhh1hhhhhhhh111111hhhhhhhh1111hhhhhh1h

```

```

DSSP hhhhhhhhhhh1111hhhhHHHHHHHHHHHHHH--LLLL111LLEEEHHHHHHHHh11
Query slrdrltqvaerqgvvfgrlqRHVAXIVVQFAA-TLTDdtGAPLLLVKGGSSLElrrgi 71
ident | |
Sbjct dklnhhqriglkyfgdfekriPREEMLMQD|IVL|n|EVK|Kvd|SEY|IAT|VCGS|FRGA---- 176
DSSP hh11hhhhhh11hh111eEHHHHHHHHHHHHHHHHHH11LLLLEELHHHHLLL----

```

```

DSSP 1111LLLLLEEEEEEL-----LHHHHHHHHHHHHHh1111eeEEEELLEEL111
Query pdsrTSKDFATVAR-----rDIELIHEQLADAGetgwegftAIFTAPEE|Iaap 119
ident | | | |
Sbjct ---eSSGDMDVLLThpsftsestkqpkLLHQVVEQLQKVH-----FIDTTLSTGK--- 222
DSSP ---1EELLEEEEEEL1111111111111111HHHHHHHHHHHLL-----LEEEEEEEEL---

```

```

DSSP 111LLEEEEEEEEEEEL--EEEEEEEEEEEEL-LLLL1111eeeee1hhh11111lee
Query gxpVKPRRFTAklSYRG--RAFATVPIEVSSV-EAGNadqfdt|ttsdalglv|gvp|aaav 176
ident | |
Sbjct ---ETKFMGVCQLPSKNdeKEYPHRRIDIRL|IpKDQY----- 256
DSSP ---LLEEEEEELLLL1111111111111111HHHH-----

```

```

DSSP ee11hHHHHhhhhhhhh111111111111HHHHHHHH-----hhhhh
Query pcxtiPWQ|Iaql|hav|tav|leep|kandra|HDLV|DLQ-----l|legl 217

```

Sbjct ----yCGVL-----yftgSDIFNKNmrahalekgftineytirplgvtg 296  
DSSP ---hHHHH-----hhhLHHHHHHHHHHHHH1leeel111eee11111

DSSP 11hHHHHhhHHHHhhhhhh1111LLLLL11111hhhhhhhhh1111111111hhhhhh  
Query 11dADLXptRSACIaifearaqhpWPPRVatlphwpliyagalegldhlelartvdaaaq 277  
ident |  
Sbjct vagEPLP--VDSEK-----difDYIQW----- 316  
DSSP 1111LLL--LHLLH-----hhhHLLL-----

DSSP hhhhhhhhhh1111  
Query avqrfvaridratkr 292  
ident |  
Sbjct ----kyrepkdrse 326  
DSSP ----1111hhh111

No 218: Query=mol1A Sbjct=4doaA Z-score=6.7

[back to top](#)

DSSP ----- 0  
Query ----- 0  
ident |  
Sbjct tlnggitdmltelanfeknvsqaihkynayrkaasviakypkiksgaeakklpgvgtki 60  
DSSP 111hhhhhhhhhhhhhh1111hhhhhhhhhhhhhh1111111hhhhh1111111hhh

DSSP -----1111111111hh 12  
Query -----aapyspptnlr 12  
ident |  
Sbjct aekideflatgklrklekirkddtsssinfltrvsgigpsaarkfvddegiktledlrkne 120  
DSSP hhhhhhhhh111hhhhhhhh1hhhhhhhh1111111hhhhhhhh11111hhhhhh1h

DSSP hhhhhhhhh1111hhhhHHHHHHHHHHHH--LLLL111LLEEEHHHHHHHHh11 71  
Query slrdrltqvaerqgvfrlqRHVAXIVVAQFAA-TLTDdtGAPLLLKGGSSLELrrgi 71  
ident | |  
Sbjct dklnhhqriglkyfgdfekriPREEMLQMCDIVLnEVKvdSEYIATVCGSFRFGA---- 176  
DSSP hh11hhhhhhhh11hhhh11eEHHHHHHHHHHHHHHHH11LLEEEELHHHLLL----

DSSP 1111LLEEEEL-----1LHHHHHHHHHHHHhh1111eeEELLEEL111 119  
Query pdsrTSKDFATVAR-----rDIELIHEQLADAGetgwegftAIFTAPEEJaap 119  
ident | | |  
Sbjct ---eSSGDMDVLLThpsftsestkqpKLLHQVVEQLQKVH-----FITDTLSKG--- 222  
DSSP ---1EELLEEEEEE11111111111HHHHHHHHHHLL-----LEEEEEEEL---

DSSP 111LLEEEEEEEL--LEEEEEEEL-LLLL1111eeeee1hhhh11111eee 176  
Query gxpVKPRRFTAklSYR--GRAFATVPIEVSSV-EAGNadqfdtltsdalglvgvpaavav 176  
ident | |  
Sbjct ---ETKFMGVCQLPSKndeKEYPHRRIDIRLlpKDQY----- 256  
DSSP ---LEEEEEEELLLL11LLLLLEEEEEEEL1HHHH-----

DSSP eellhHHHHhhhhhh1111111111HHHHHH--hhhh 217  
Query pcxtiPWQiaqk1havtavleepkandraHDLVDLQ-----1legl 217  
ident |  
Sbjct ----yCGVL-----yftgSDIFNKNmrahalekgftineytirplgvtg 296  
DSSP ---hHHHH-----hhhLHHHHHHHHHHHHH1leeel111eee11111

DSSP 11hHHHHhhHHHHhhhhhh1111LLLLL11111hhhhhhhhh1111111111hhhhhh 277  
Query 11dADLXptRSACIaifearaqhpWPPRVatlphwpliyagalegldhlelartvdaaaq 277  
ident |  
Sbjct vagEPLP--VDSEK-----difDYIQW----- 316  
DSSP 1111LLL--LHLLH-----hhhHLLL-----

DSSP hhhhhhhhhh1111  
Query avqrfvaridratkr 292  
ident |  
Sbjct ----kyrepkdrse 326  
DSSP ----1111hhh111

No 219: Query=mol1A Sbjct=3rh6A Z-score=6.7

[back to top](#)

```
DSSP -----
Query ----- 0
ident
Sbjct tlnggitdmltelanfeknvsqaihkynayrkaasviakyphkiksgaeakklpgvgtki 60
DSSP 111hhhhhhhhhhhhhhhh111hhhhhhhhhhhhhhhh111111hhhh11111hhhh

DSSP -----111111111hh
Query -----aapyspptnlr 12
ident
Sbjct aekideflatgklrklekirqddtssinfltrvsgigpsaarkfvdegiktledlrkne 120
DSSP hhhhhhhhhhh111hhhhhhhhhhhhhhhh111111hhhhhhhhhh1111hhhh11h

DSSP hhhhhhhhhhh1111hhhhHHHHHHHHHHHHHHH-LLLL11LLLLEEEEHHHHHHHHhh11
Query slrdrltqvaerqgvfgrlqRHVAXIVVAQFAA-TLTDdtGAPLLLVKGGSSLELrrgi 71
ident
Sbjct dklnhhqriglkyfgdfekriPREEMLQMQDIVLnEVKKvdSEYIATVCGSFRRGA---- 176
DSSP hh11hhhhhhhh1hhhh11eHHHHHHHHHHHHHHHHHH1LLEEEELHHHHLLL----

DSSP 1111LLLLEEEEEL-----1LHHHHHHHHHHHHhh111leeEEELLEEEL111
Query pdsrTSKFATVAR-----rDIELIHEQLADAGetgwegftAIFTAPEElaap 119
ident
Sbjct ---eSSGMDVLLThpsftsestkpqkLLHQVVEQLQKVH-----FITDTLSKG--- 222
DSSP ---1EELLEEEL1111111111111111HHHHHHHHHHHLL-----LEEEEEEEL---

DSSP 1111LLLLEEEEEEEL--LEEEEEEEEEEL-LLLL1111eeee1hhhh11111lee
Query gxpVKPRRFTAKLSYR--GRAFATVPIEVSSV-EAGNadqfdtlttsdalglvgvpaavav 176
ident
Sbjct ---ETKFMGVCQLPSKndEKEYPHRRIDIRLIpKDQY----- 256
DSSP ---LLEEEEEEELLLL11LLLLLLEEEEEEEL1HHHH-----

DSSP eel1hHHHHhhhhhhhh1111111111HHHHHHH-----hhhhh
Query pcxtiPWQIaqlhavtavleepkandraHDLVDLQ-----llegl 217
ident
Sbjct ---yCGVL-----aftgSDIFNKNmrahalekgftineytirplgvtg 296
DSSP ---hHHHH-----hhl1LHHHHHHhhhhhhhhleeel11lee11111

DSSP 11hHHHHhhHHHHhhhhhh1111LLLLL11111hhhhhhhh1111111111hhhhhh
Query 1ldADLXptRSACIaifearaqhpWPPRVatlpwplyagalegldhelartvdaaaq 277
ident
Sbjct vagEPLP--VDSEK-----difDYIQW----- 316
DSSP 111LLLL--LLLH-----hHHHLLL-----

DSSP hhhhhhhhhhh1111
Query avqrfvaridratkr 292
ident
Sbjct ----kyrepkdrse 326
DSSP ----1111hhhh11
```

No 220: Query=mol1A Sbjct=3jpsA Z-score=6.7

[back to top](#)

```
DSSP -----
Query ----- 0
ident
Sbjct tlnggitdmltelanfeknvsqaihkynayrkaasviakyphkiksgaeakklpgvgtki 60
DSSP 111hhhhhhhhhhhhhhhh111hhhhhhhhhhhhhhhh111111hhhh11111hhhh

DSSP -----111111111hh
Query -----aapyspptnlr 12
ident
Sbjct aekideflatgklrklekirqddtssinfltrvsgigpsaarkfvdegiktledlrkne 120
```

DSSP hhhhhhhhhhh1111hhhhHHHHHHHHHHHH-LLLL11LLLLEEEHHHHHHhh11  
Query slrdrltqvaerqgvfgrlqRHVAXIVVAQFAA-TLTDdtGAPLLLKVGGSSELELrgi 71  
ident | |  
Sbjct dklnhhqrigrlyfgdfekriPREEMLMQDIVLnEVKKvdSEYIATVCGSFRRGA---- 176  
DSSP hhl1hhhhhhhh11hhhh1leEHHHHHHHHHHHHHHHHHh1LLLEEEELHHHHLLL----

DSSP 1111LLLLEEEEL-----1LHHHHHHHHHHHHhh1111eeEEELLEEL111  
Query pdsrTSKDFATVAR-----rDIELIHEQLADAGetgwegftAIFTAPEEJaap 119  
ident | | | | |  
Sbjct ---eSSGDMVLLThpsftsestkqpkLLHQVVEQLQKVH-----FITDTLSKG--- 222  
DSSP ---1EELLEEEEEE111111111111HHHHHHHHHHLLL-----LEEEEEEEL---

DSSP 111LLLLEEEEEEEL--LEEEEEEEL-LLL111leeeehhhh1111leee  
Query gxpVKPRRFTAKLSYR--GRAFATVPIEVSSV-EAGNadqfdtlttsdalglvgpavaav 176  
ident | | |  
Sbjct ---ETKFMGVCQLPSKndEKEYPHRRIDIRLIpKDQY----- 256  
DSSP ---LLEEEEEE111111111111LEEEEEEEL1HHH-----

DSSP eellHHHHHHhhhhhh1111111111HHHHHH-----hhhhh  
Query pcxtiPWQIaqlhavtavleepkandraHDLVDLQ-----llegl 217  
ident | | | | |  
Sbjct ----yCGVL-----yftgSDIFKNmrahalekgftineytirplgvtg 296  
DSSP ----hHHHH-----hhlLHHHHHHhhhhhh1lee111lee11111

DSSP 11hHHHHHHHHHHhhhh1111111111HHHHHH-----hhhhh  
Query 1ldADLXptRSACIaifearaqhpWPPRVatlpwhpiyagalegldhlelartvdaaaq 277  
ident | | | | |  
Sbjct vagEPLP--VDSEK-----difDYIQW----- 316  
DSSP 111LLL--LLLH-----hhhHLLL-----

DSSP hhhhhhhhh1111  
Query avqrfvaridratkr 292  
ident | | | | |  
Sbjct ----kyrepkdrse 326  
DSSP ----1111hh111

### No 221: Query=mol1A Sbjct=3uxnB Z-score=6.7

[back to top](#)

DSSP -----  
Query ----- 0  
ident | | | | |  
Sbjct tlnggitdmlvelanfeknvsqaihkynayrkaasviakyphkiksgaeakklpgvgtki 60  
DSSP 111hhhhhhhhhhhhhhhh111hhhhhhhhhhhhhh1111111111111111hhhh

DSSP -----111111111hh  
Query -----aapyspptnlr 12  
ident | | | | |  
Sbjct aekideflatgklrklekirddtssinfltrvtgigpsaarklvdegiktledlrkne 120  
DSSP hhhhhhhhh111111111111hhhh1111111111hhhhhhhh1111111111

DSSP hhhhhhhhhhh1111hhhhHHHHHHHHHHHH-LLLL11LLLLEEEHHHHHHhh11  
Query slrdrltqvaerqgvfgrlqRHVAXIVVAQFAA-TLTDdtGAPLLLKVGGSSELELrgi 71  
ident | | | | |  
Sbjct dklnhhqrigrlyfedfekriPREEMLMQDIVLnEVKKldPEYIATVCGSFRRGA---- 176  
DSSP 111111hhhh1hhhh11leEHHHHHHHHHHHHHHHh1LLLEEEELHHHHLLL----

DSSP 1111LLLLEEEEL-----1LHHHHHHHHHHHHhh1111eeEEELLEEL111  
Query pdsrTSKDFATVAR-----rDIELIHEQLADAGetgwegftAIFTAPEEJaap 119  
ident | | | | |  
Sbjct ---eSSGDMVLLThpnftsesskqpkLLHRVVEQLQKVR-----FITDTLSKG--- 222  
DSSP ---1EELLEEEEEE11111111111hHHHHHHHHHHLLL-----LEEEEEEEL---

DSSP 111LLLLEEEEEELE--EEEEEEEEL-LLL111leeeehhhh1111leee



```
ident | |
Sbjct ---ETKFMGVCQLPSENDenEYPHRRIDIRLIpKDQY----- 256
DSSP ---LLEEEEEELLLLLL11LLLLLEEEEEEL1HHHH-----

DSSP ee11hHHHHhhhhhhhh1111111111HHHHHH-----hhhhh
Query pcxtiPWQIaqlhavlaveepkandraHDLVDLQ-----llegl 217
ident |
Sbjct ----yCGVL-----yftgSDIFNKNmrahalekgftineytirplgvtg 296
DSSP ----hHHHH-----hhh1LHHHHHHhhhhhh1lee1111ee11111

DSSP 11hHHHHhhHHHHhhhhhh1111LLLLL1111hhhhhhhh11111111hhhhhh
Query 1ldADLXptRSACIaifearaqhpWPPRVatlphwpliyagalegldhlelartvdaaaq 277
ident |
Sbjct vagEPLP--VDSEQ-----difDYIQW----- 316
DSSP 111LLL--LLHH-----hhhHLLL-----

DSSP hhhhhhhhh1111
Query avqravaridratkr 292
ident
Sbjct -----ryrepkdrs 325
DSSP -----1111hh11
```

No 222: Query=mol1A Sbjct=9icnA Z-score=6.7

[back to top](#)

```
DSSP ----- 0
Query -----
ident
Sbjct etlnggitdmltelanfeknvsqaihkynayrkaasviakyphkiksgaeakklpgvgtk 60
DSSP 1111hhhhhhhhhhhhhh1111hhhhhhhhhhhhhh111111hhhh11111hh

DSSP -----111111111h
Query -----aapyspsptnl 11
ident
Sbjct iaekideflatgklrklekirqddtssinfltrvsgigpsaarkfvdegiktledlrkn 120
DSSP hhhhhhhhh1111hhhhhh1111hhhhhhhh111111hhhhhhhh11111hhhhhh1

DSSP hhhhhhhhhhh1111hhhhHHHHHHHHHHHHH-LLLL11LLLLEEEHHHHHHhh1
Query rslrdr1tqvaerqgvfgrlqRHVAXIVVAQFAA-TLTDdtGAPLLLVKGGSSLELrrg 70
ident | |
Sbjct edklnhhqriglkyfgdfekriPREEMLMQDIVLnEVKKvdSEYIATVCGSFRGA--- 177
DSSP 1111hhhhhhhh1hhhh11eHHHHHHHHHHHHHHHHH1LLEEEELLLLLL---

DSSP 1111LLLLEEEEL-----1LHHHHHHHHHHHHhh1111eeEEELLEEL11
Query ipdsrTSKDFATVAR-----rDIELIHEQLADAGetgwegftAIFTAPEEIaa 118
ident | | | |
Sbjct ----eSSGDMDVLLThpsftsestkpqkLLHQVVEQLQKVH-----FITDTLSKG-- 223
DSSP ----1EELLEEEEEEe1111111111hHHHHHHHHHHHLL-----LEEEEEEEL--

DSSP 1111LLLLEEEEEEELL--EEEEEEEEEEEL-LLLL1111eeeee1hhhh11111ee
Query pgxpVKPRRFTAKLSYRG--RAFATVPIEVSSV-EAGNadqfdtltsdalglvgvpaava 175
ident | |
Sbjct ---ETKFMGVCQLPSKNdeKEYPHRRIDIRLIpKDQY----- 257
DSSP ---LLEEEEEELLLLL11LLLLLEEEEEEEeHHHH-----

DSSP ee11hHHHHhhhhhhhh1111111111hhhhHHHHHH-----
Query vpcxtiPWQIaqlhavlaveepkandrahdlvDLQLLE----- 215
ident
Sbjct ----yCGVL-----yftgSDIFNKNmrahalekgftineytirp 292
DSSP ----hHHHH-----hhh1LHHHHHHhhhhhhhh1111ee11ee11

DSSP -hh11hhhhhhHHHHHHhhhh1111LLLLL1111hhhhhhhh11111111hhhh
Query -gl1ldadlxptRSACIaifearaqhpWPPRVatlphwpliyagalegldhlelartvda 274
ident
Sbjct lgvgtgavageplpVDSEKD-----ifdYIQWK----- 318
DSSP 111111111111LLLHHH-----hhhHLLL-----
```

DSSP hhhhhhhhhhhhhhh1111  
Query aaqavqrfvaridratkr 292  
ident  
Sbjct -----yrepkdrse 327  
DSSP -----111hhhh11

No 223: Query=mol1A Sbjct=2fmsA Z-score=6.7

[back to top](#)

DSSP -----  
Query ----- 0  
ident  
Sbjct tlnggitdmltelanfeknvsqaihknayrkaasviakyphkiksgaeakklpgvgtki 60  
DSSP 111hhhhhhhhhhhhhhhh1111hhhhhhhhhhhhhhhh11111111hhhh111111hh

DSSP -----111111111hh  
Query -----aapyspntnr 12  
ident  
Sbjct aekideflatgklrklekirqddtssinfltrvsgigpsaarkfvdegiktledlrkne 120  
DSSP hhhhhhhhh111hhhhhhhhhhhhhhhh1111111hhhhhhhh11111hhhhhhhh

DSSP hhhhhhhhhhh1111hhhhHHHHHHHHHHHHHH-LLLLLLLLLLEEEHHHHHHHHhh11  
Query slrdrltqvaerqgvfgrlqRHXVAXIVVAQFAA-TLDDTGAPLLLVKGGSSLELrrgi 71  
ident  
Sbjct dklnhhqriglkyfgdfekriPREEMLQMQDIVLnEVKKVDSEYIATVCGSFRRGA---- 176  
DSSP hhl1hhhhhhhh111hhhh1leEHHHHHHHHHHHHHHHHHHHLLLLLEEEELHHHHLLL----

DSSP 1111LLLLLEEEEL-----1LHHHHHHHHHHHHhh111leeEEELLEEEL111  
Query pdsrTSKDFATVAR-----rDIELIHEQLADAGetgwegftAIFTAPEEaap 119  
ident  
Sbjct ---eSSGMDVLLThpsftsestqpkLLHQVVEQLQKVH-----FITDTLSKG--- 222  
DSSP ---1EELLEEEEEE11lee1lee1111HHHHHHHHHHHLL-----LEEEEEEEL---

DSSP 1111LEEEEEEEL--LEEEEEEEL-LLLL111leee1hhhh1111lee  
Query gxpVKPRRFTAKLSYR--GRAFATVPIEVSSV-EAGNadqfdtltsdalglvqpaavav 176  
ident  
Sbjct ---ETKFMGVCQLPSKndEKEYPHRRIDIRLIpKDQY----- 256  
DSSP ---LLEEEEEEELLLL11111111LEEEEEEEL1HHHH-----

DSSP eellhHHHHhhhhhhhh1111111111HHHHHHH-----hhhhh  
Query pcxtiPwQIaqklhavtavleepkandraHDLVDLQ-----llegl 217  
ident  
Sbjct ----yCGVL-----yftgSDIFNKNmrahalekgftineytirplgvtg 296  
DSSP ----hHHHH-----hhhlLHHHHHHhhhhhhhhleeell11lee1111

DSSP 11hHHHHhhHHHHhhhhhh1111LLLLL1111hhhhhhhh1111111111hhhhhh  
Query 1ldADLXptRSACIaifearaqhpWPPRVAtlphwplyagalegldhlelartvdaaaq 277  
ident  
Sbjct vagEPLP--VDSEK-----difDYIQWK----- 317  
DSSP 111LLL--LLLH-----hhHHLLLL-----

DSSP hhhhhhhhhhh1111  
Query avqrfvaridratkr 292  
ident  
Sbjct -----yrepkdrse 326  
DSSP -----111hhhh11

No 224: Query=mol1A Sbjct=1huoB Z-score=6.7

[back to top](#)

DSSP -----  
Query ----- 0  
ident

```

DSSP 111hhhhhhhhhhhhhhhh111hhhhhhhhhhhhhhhh111111hhhh11111hh
DSSP -----11111111hh
Query -----aapyspptnlr 12
ident
Sbjct aekideflatgklrklekirqddtssinfltrvtgigpsaarklvdegiktledlrkne 120
DSSP hhhhhhhhh111hhhhhhhhhhhhhhhh111111hhhhhhhh1111hhhh11h

DSSP hhhhhhhhhhh1111hhhhHHHHHHHHHHHHHHH-LLLL111LLEEEHHHHHHHHhh11
Query slrdrltqvaerqgvfgrlqRHVAXIVVAQFAA-TLTDdtGAPLLLVKGGSSLELrrgi 71
ident | |
Sbjct dklnhhqriglkyfedfekriPREEMLQMqDIVLnEVKk1dPEYIATVCGSFRRGA---- 176
DSSP hhl1hhhhhhhhhhhhhh11eHHHHHHHHHHHHHHHHHH1LLEEEELHHHHLL----

DSSP 1111LLEEEEEEEL-----1LHHHHHHHHHHHHhh1111eeEEELLEEL111
Query pdsrTSKDFATVAR-----rDIELIHEQLADAGetgwegftAIFTAPEEJaap 119
ident | | | |
Sbjct ---eSSGDMdVLLThpnftsesskqpkLLHRVVEQLQKVR-----FITDTLSKG--- 222
DSSP ---1EELLEEEEEE1111111111hhHHHHHHHHHHLL-----LLEEEEEEEL---

DSSP 111LLEEEEEEEL--LEEEEEEEL-LLLL1111eeehhh1111lee
Query gxpVKPRRFTAKLSYR--GRAFATVPIEVSSV-EAGNadqfdtlttsdalglvgvpaavav 176
ident | |
Sbjct ---ETKFMGVCQLPSEndENEYPHRRIDIRLIpKDQY----- 256
DSSP ---LLEEEEEEELLLL111LLEEEEEEEL1HHHH-----

DSSP eel1hHHHHhhhhhh1111111111HHHHHHH-----hhhhh
Query pcxtiPWQIaqlhavlavlepkandraHDLVDLQ-----llegl 217
ident |
Sbjct ---yCGVL-----yftgSDIFNKNmrahaalekgftineytirplgvtg 296
DSSP ---hHHHH-----hhl1LHHHHHHhhhhhhhhlee111lee1111

DSSP 11hHHHHhhHHHHhhhhhh1111LLELL1111hhhhhhhh111111111hhhhhh
Query 1ldADLXptRSACIaifearaqhpWPPRVAtlphwpliyagalegldhlelartvdaaaq 277
ident |
Sbjct vagEPLP--VDSEQ-----difDYIQWR----- 317
DSSP 111LLELL--LLLHH-----hHHHHLLLL-----

DSSP hhhhhhhhhhh1111
Query avqrfvaridratkr 292
ident
Sbjct -----yrepkdrs 325
DSSP -----11111111

```

No 225: Query=mol1A Sbjct=2pxiA Z-score=6.7

[back to top](#)

```

DSSP -----
Query ----- 0
ident
Sbjct tlnggitdmltelanfeknvsqaihkynayrkaasviakyphkiksgaeakklpgvgtki 60
DSSP 111hhhhhhhhhhhhhhhh111hhhhhhhhhhhhhhhh111111hhhh11111hh

DSSP -----11111111hh
Query -----aapyspptnlr 12
ident
Sbjct aekideflatgklrklekirqddtssinfltrvsgigpsaarkfvdegiktledlrkne 120
DSSP hhhhhhhhh111hhhhhhhhhhhhhhhh111111hhhhhhhh1111hhhh11h

DSSP hhhhhhhhhhh1111hhhhHHHHHHHHHHHHH-LLLL111LLEEEHHHHHHHHhh11
Query slrdrltqvaerqgvfgrlqRHVAXIVVAQFAA-TLTDdtGAPLLLVKGGSSLELrrgi 71
ident | |
Sbjct dklnhhqriglkyfgdfekriPREEMLQMqDIVLnEVKkvDSEYIATVCGSFRRGA---- 176
DSSP hhl1hhhhhhhh111hh11eHHHHHHHHHHHHHHHHHH1LLEEEELHHHHLL----

```





[back to top](#)

```

DSSP -----
Query ----- 0
ident
Sbjct etlnggitdmltelanfeknvsqaihknayrkaasviakyphkiksgaeakklpgvgtk 60
DSSP 1111hhhhhhhhhhhhhhhhhh1111hhhhhhhhhhhhhhhh111111hhhhhh11111hh

DSSP -----1111111111h
Query -----aapyspsptnl 11
ident
Sbjct iaekideflatgklrklekirqddtssinflttrvsgigpsaarkfvdegiktledlrkn 120
DSSP hhhhhhhhhhh1111hhhhhhhhhhhhhhhhhh111111hhhhhhhhhh1111hhhhhhhh1

DSSP hhhhhhhhhhh1111hhhhhhHHHHHHHHHHHHHH-LLLL11LLLLEEEEEHHHHHHHHhh1
Query rsldrqltqaerqgvfgrlqRHVAXIVVAQFAA-TLTDdtGAPLLLVKGGSSLELrrg 70
ident
Sbjct edklnhhqriglkyfgdfekriPREEMLQMQDIVLnEVKkvdSEYIATVCGSFRRGA--- 177
DSSP hhh11hhhhhhhhhhhhhh11eHHHHHHHHHHHHHHHHHH11LLLEEEEEE11111111---

DSSP 111111111111111111111111111111111111111111111111111111111111
Query ipdsrTSKDFATVAR-----rDIELIHEQLADAGetgwegftAIFTAPEEIaa 118
ident
Sbjct ----eSSGMDVLLThpsftsestqpkLLHQVVEQLQKVH-----FITDTLSKG-- 223
DSSP ----1EELLEEEEE11111111111111111111111111111111111111111111111---

DSSP 111111111111111111111111111111111111111111111111111111111111
Query pgxpVKPRRFTAKLSYRG--RAFATVPIEVSSV-EAGNadqfdtltaldglvgpaava 175
ident
Sbjct ---ETKFMGVCQLPSKNdeKEYPHRRIDIRLIpKDQY----- 257
DSSP ---LLEEEEE11111111111111111111111111111111111111111111111---

DSSP ee1111111111111111111111111111111111111111111111111111111111
Query vpcxtiPWQIaqlhavtavleekandrahdLvDLQLE----- 215
ident
Sbjct -----yCGVL-----yftgSDIFNKnmrahaekgftineytirp 292
DSSP -----hHHHH-----hh11111111111111111111111111111111111111111111111

DSSP -hh1111111111111111111111111111111111111111111111111111111111
Query -gl1ldadlxptRSACIaifearaqhpWPPRVat1phwpliyagalegldhlelartvda 274
ident
Sbjct lgvvgvageplpVDESEK-----difDYIQWK----- 318
DSSP 111111111111111111111111111111111111111111111111111111111111

DSSP hhhhhhhhhhhhh1111
Query aaqavqrfvaridratkr 292
ident
Sbjct -----yrepkdrse 327
DSSP -----111hhhh111

```

No 229: Query=mol1A Sbjct=9ic1A Z-score=6.7

[back to top](#)

```

DSSP -----
Query ----- 0
ident
Sbjct etlnggitdmltelanfeknvsqaihknayrkaasviakyphkiksgaeakklpgvgtk 60
DSSP 1111hhhhhhhhhhhhhhhhhh1111hhhhhhhhhhhhhhhh111111hhhhhh11111hh

DSSP -----1111111111h
Query -----aapyspsptnl 11
ident
Sbjct iaekideflatgklrklekirqddtssinflttrvsgigpsaarkfvdegiktledlrkn 120
DSSP hhhhhhhhhhh1111hhhhhhhhhhhhhhhhhh111111hhhhhhhh11111hhhhhh1

```

DSSP hhhhhhhhhhhhh1111hhhhHHHHHHHHHHHH-LLLL11LLLLEEEHHHHHHhh1  
Query rslrdrltqvaerqgvfgrlqRHVAXIVVAQFAA-TLTDdtGAPLLLKGGSSLELrrg 70  
ident | |  
Sbjct edklnhhqriglkyfgdfekriPREEMLQMqDIVLnEVKKvdSEYIATVCGSFRRGA--- 177  
DSSP hhh11hhhhhhhh1hhhh1leEHHHHHHHHHHHHHHHHH1LLEEEELLLLLLLL---

DSSP 1111LLLLEEEEL-----1LHHHHHHHHHHHHhh1111eeEEELLEEL11  
Query ipdsrTSKDFATVAR-----rDIELIHEQLADAGetgwegftAIFTAPEEIaa 118  
ident | | | | |  
Sbjct ----eSSGDMVLLThpsftsestkqpkLLHQVVEQLQKVH-----FITDTLSKG-- 223  
DSSP ----1EELLEEEEEEe1111111111hHHHHHHHHHHLL-----LEEEEEEEL--

DSSP 1111LLLLEEEEEEEL--EEEEEEEEEEEL-LLLL1111eeeee1hhhh11111lee  
Query pgxpVKPRRFTAkLSYRG--RAFATVPIEVSSV-EAGNadqfdtltsdalglvgvpaava 175  
ident | | | | |  
Sbjct ----ETKFMGVCQLPSKNdeKEYPHRRIDIRLIpKDQY----- 257  
DSSP ----LLEEEEEEELLLLL11LLLLEEEEEEeHHHH-----

DSSP eeellhHHHHhhhhhh1111111111hhhhHHHHHH-----  
Query vpcxtiPWQIaqlhavtavleekandrahd1vDLQLE----- 215  
ident | | | | |  
Sbjct ----yCGVL-----yftgSDIFNkmrahalekgftineytirp 292  
DSSP ----hHHHH-----hhh1LHHHHhhhhhh1leeelllee

DSSP --hh11hhhhhhHHHHhhhh1111LLL1111hhhhhhhh111111111hh  
Query --gllldadlxptrSACIaifearaqhpWPPRVat1phwpliayageldh1elartvd 273  
ident | | | | |  
Sbjct lgvTgvageplpvdSEKD-----ifdYIQWK----- 318  
DSSP 111111111111LHHH-----hhhHLLL-----

DSSP hhhhhhhhhhhhh1111  
Query aaaqavqrfvaridrskr 292  
ident | | | | |  
Sbjct -----yrepkdrse 327  
DSSP -----111hhhh11

No 230: Query=mol1A Sbjct=8icca Z-score=6.7

[back to top](#)

DSSP -----  
Query ----- 0  
ident | | | | |  
Sbjct etlnggitdmltelanfknvsqaihknayrkaasviakyphkiksgaeakklpgvgtk 60  
DSSP 1111hhhhhhhhhhhh111hhhhhhhhhhhh111111hhhh11111hh

DSSP -----111111111h  
Query -----aapyspsptnl 11  
ident | | | | |  
Sbjct iaekideflatgklrklekirqddtssinfltrvsgigpsaarkfvdegiktledlrkn 120  
DSSP hhhhhhhhh1111hhhhhhhh1hhhhhhhh111111hhhhhhhh1111hhhhhh1

DSSP hhhhhhhhhhh1111hhhhHHHHHHHHHH-LLLL11LLLLEEEHHHHHHhh1  
Query rslrdrltqvaerqgvfgrlqRHVAXIVVAQFAA-TLTDdtGAPLLLKGGSSLELrrg 70  
ident | |  
Sbjct edklnhhqriglkyfgdfekriPREEMLQMqDIVLnEVKKvdSEYIATVCGSFRRGA--- 177  
DSSP hhh11hhhhhhhh1hhhh1leEHHHHHHHHHHHHHHHHH1LLEEEELLLLLLLL---

DSSP 1111LLLLEEEEL-----1LHHHHHHHHHHHHhh1111eeEEELLEEL11  
Query ipdsrTSKDFATVAR-----rDIELIHEQLADAGetgwegftAIFTAPEEIaa 118  
ident | | | | |  
Sbjct ----eSSGDMVLLThpsftsestkqpkLLHQVVEQLQKVH-----FITDTLSKG-- 223  
DSSP ----1EELLEEEEEEe1111111111hHHHHHHHHHHLL-----LEEEEEEEL--

DSSP 1111LLLLEEEEEEEL--EEEEEEEEEEEL-LLLL1111eeeee1hhhh11111lee  
Query pgxpVKPRRFTAkLSYRG--RAFATVPIEVSSV-EAGNadqfdtltsdalglvgvpaava 175  
ident | | | | |

DSSP ----LLEEEEEELLLLLL11LLLLLEEEEEEEeHHHH-----

DSSP eeellhHHHHhhhhhhhh1111111111hhhhHHHHHH-----  
Query vpcxtiPWQIaqklhavtavleepkandrahdvDLQLE----- 215  
ident  
Sbjct ----yCGVL-----yftgSDIFNKnmrahalekgftineytirp 292  
DSSP ----hHHHH-----hhh1LHHHHhhhhhhhh111leelleell

DSSP --hllhhhhhhhhHHHHhhhhhh1111LLLLL1111hhhhhhhh111111111hh  
Query --glldadlxptrSACIaifearaqhpWPPRVatlphwplyagalegldhlelartvd 273  
ident  
Sbjct lgvttvageplpvdSEK-----ifdYIQWK----- 318  
DSSP 1111111111111LHHH-----hhhLLLL-----

DSSP hhhhhhhhhhhhh1111  
Query aaaqavqrvaridratkr 292  
ident  
Sbjct -----yrepkdrse 327  
DSSP -----111hhh111

No 231: Query=mol1A Sbjct=9icwA Z-score=6.7

[back to top](#)

DSSP -----  
Query ----- 0  
ident  
Sbjct etlnggitdmltelanfeknvsqaihkynayrkaasviakyphkiksgaeakklpvgvgtk 60  
DSSP 1111hhhhhhhhhhhhhh1111hhhhhhhhhhhhhh111111hhhh11111hh

DSSP -----111111111h  
Query -----aapyspntl 11  
ident  
Sbjct iaekideflatgklrklekirqddtsssinfptrvsgigpsaarkfvddegiktledlrkn 120  
DSSP hhhhhhhhh111hhhh111hhhhhhhh111111hhhhhhhh1111hhhhhh1

DSSP hhhhhhhhhhh111hhhhHHHHHHHHHHHHH-LLLL11LLLLLEEEEEHHHHHHhh1  
Query rslrdrltqvaerqgvfgrlqRHVAXIVVAQFAA-TLTDdtGAPLLLVKGGSSLELrrg 70  
ident  
Sbjct edklnhhqriglkygdfekriPREEMLQMQDIVLnEVKKvdSEYIATVCGSFRRGA--- 177  
DSSP hhh1hhhhhh111hhh1leEHhHHHHHHHHHHhhHHHH1LLEEEEELLLLLLL---

DSSP 1111LLLLLEEEEL-----1LHHHHHHHHHHhh111leeEEEELEEL11  
Query ipdsrTSKDFATVAR-----rDIELIHQVVEQLQKVH-----FITDTLSKG-- 118  
ident  
Sbjct ----eSSGDMDVLLThpsftsestqpkLLHQVVEQLQKVH-----FITDTLSKG-- 223  
DSSP ----1EELEEEEEEL1111111111hhHHHHHHHHHLL-----LEEEEEEEL--

DSSP 1111LLLLLEEEEEEEL--EEEEEEEEEEEL-LLLL111leeeelhhhh1111lee  
Query pgxpVKPRRFTAKLSYRG--RAFATVPIEVSSV-EAGNadqfdtltsdalglvpaava 175  
ident  
Sbjct ----ETKFMGVCQLPSKNdeKEYPHRRIDIRLIpKDQY----- 257  
DSSP ----LLEEEEEELLLLLL11LLLLLEEEEEEEeHHHH-----

DSSP eeellhHHHHhhhhhhhh1111111111hhhhHHHHHH-----  
Query vpcxtiPWQIaqklhavtavleepkandrahdvDLQLE----- 215  
ident  
Sbjct ----yCGVL-----yftgSDIFNKnmrahalekgftineytirp 292  
DSSP ----hHHHH-----hhh1LHHHHhhhhhhhh1leeeleeeee

DSSP --hllhhhhhhhhHHHHhhhhhh1111LLLLL1111hhhhhhhh111111111hh  
Query --glldadlxptrSACIaifearaqhpWPPRVatlphwplyagalegldhlelartvda 274  
ident  
Sbjct lgvttvageplpvdSEK-----difDYIQW----- 317  
DSSP 111111111111LHHH-----hhhHHLLL-----



Query aaqavqrfvaridratkr 292  
ident  
Sbjct -----kyrepkdrse 327  
DSSP -----1111hhhl11

No 232: Query=mol1A Sbjct=7iciA Z-score=6.7

[back to top](#)

DSSP -----  
Query ----- 0  
ident  
Sbjct etlnggitdmltelanfeknvsqaihkynayrkaasviakyphkiksgaeakklpgvgtk 60  
DSSP 1111hhhhhhhhhhhhhhhh1111hhhhhhhhhhhhhhhh111111hhhhh11111hh

DSSP -----1111111111h  
Query -----aapyspsptnl 11  
ident  
Sbjct iaekideflatgklrklekirkddtssinfltrvsgigpsaarkfvdegiktledlrkn 120  
DSSP hhhhhhhhh1111hhhhhh111hhhhhhhhhh111111hhhhhhhh111111hhhhhh1

DSSP hhhhhhhhhhh1111hhhhHHHHHHHHHHHHHHH-LLLL11LLLEEEHHHHHHHHhh1  
Query rslrdrltqvaerqgvfgrlqRHVAXIVVAQFAA-TLTDdtGAPLLLKGGSSLELrrg 70  
ident | |  
Sbjct edklnhhqriglkyfgdfekriPREEMLQMqDIVLnEVKKvdSEYIATVCGSFRRGA--- 177  
DSSP hhh11hhhhhhhh1hhhhhl1eEHHHHHHHHHHHHHHHHHH1LLEEEELLLLLLLL---

DSSP 11111LLLEEEEL-----1LHHHHHHHHHHHHhh1111eeEELLEEL11  
Query ipdsrTSKDFATVAR-----rDIELIHEQLADAGetgwegftAIFTAPEEIaa 118  
ident | | | | |  
Sbjct ---eSSGDMDVLLThpsftsestkpklLHQVVEQLQKVH-----FITDTLSKG-- 223  
DSSP ----1EELLEEEEEEe1111111111hHHHHHHHHHHLL-----LEEEEEEEL--

DSSP 1111LLLEEEEEEEL--EEEEEEEEEEEL-LLLL1111eeehhhh1111lee  
Query pgxpVKPRRFTAKLSYRG--RAFATVPIEVSSV-EAGNadqfdtlttsdalglvgvpaava 175  
ident | |  
Sbjct ---ETKFMGVCQLPSKNdeKEYPHRRIDIRLIpKDQY----- 257  
DSSP ---LLEEEEEEELLLLL11LLLEEEEEEeHHHH-----

DSSP ee11hHHHHhhhhhhhh11111111111hhhhHHHHHH-----  
Query vpcxtiPWQIaqlhvtavleekandrahd1vDLQLE----- 215  
ident  
Sbjct ---yCGVL-----yftgSDIFNkmraha1ekgftineytirp 292  
DSSP ---hHHHH-----hhh1LHHHHhhhhhhhh1leee1leeee

DSSP -hh11hhhhhhhhHHHHHHhhhh1111LLLLL11111hhhhhhhh1111111111hh  
Query -gl1ldadlxptRSACIAifearaqhpWPPRVat1phwpliyagaleglhdhlelartvda 274  
ident  
Sbjct lgv1gvageplpVDSEKD-----ifdYIQWK----- 318  
DSSP 111111111111LLHHH-----hhhL-----

DSSP hhhhhhhhhhh1111  
Query aaqavqrfvaridratkr 292  
ident  
Sbjct -----yrepkdrse 327  
DSSP -----111hhhl11

No 233: Query=mol1A Sbjct=7icrA Z-score=6.7

[back to top](#)

DSSP -----  
Query ----- 0  
ident  
Sbjct etlnggitdmltelanfeknvsqaihkynayrkaasviakyphkiksgaeakklpgvgtk 60  
DSSP 1111hhhhhhhhhhhhhhhh1111hhhhhhhhhhhhhhhh111111hhhhh11111hh



Sbjct ---eSSGDMDVLLThpsftsestkqpkLLHQVVEQLQKVH-----FITDTLSKG-- 223  
DSSP ---1EELLEEEEEEE1111111111hHHHHHHHHHHHLL-----LEEEEEEL--

DSSP 1111LLEEEEEEEEEELL--EEEEEEEEEEELLLLL1111eeeee1hhhh11111lee  
Query pgxpVKPRRFTAKLSYRG--RAFATVPIEVSSVEAGNAdqfdtlttsdalglvgpaavav 176  
ident | |  
Sbjct ---ETKFMGVCQLPSKNdeKEYPHRRIDIRLIPKDQY----- 257  
DSSP ---LLEEEEEELLLLL1111LLEEEEEELLLLLH-----

DSSP ee11hHHHHhhhhhh1111111111hHHHHHH-----  
Query pcxtiPWQIaqklhavtavleepkandrahdldLQLE----- 215  
ident  
Sbjct ---yCGVL-----yftgSDIFNKNmrahalekgftineytirpl 293  
DSSP ---hHHHH-----hhhlHHHHhhhhhhhh11eeleeeel

DSSP -hh11hhhhhhhhHHHHhhhhhh1111LLELLLL1111hHHHHhhhh11111111hh  
Query -gllldadlxptrSACIaifearaqhpWPPRVatlpwpliyagalegldhlelartvda 274  
ident |  
Sbjct gvtgvageplpvdSEKD-----ifdYIQWK----- 318  
DSSP 111111111111LHHH-----hhhHLLL-----

DSSP hhhhhhhhhhh1111  
Query aaqavqrfvaridratkr 292  
ident  
Sbjct -----yrepkdrse 327  
DSSP -----111hhhh111

No 235: Query=mol1A Sbjct=8icvA Z-score=6.7

[back to top](#)

DSSP -----  
Query ----- 0  
ident  
Sbjct etlnggitdmltelanfeknvsqaihknayrkaasviakypkiksgaeakklpgvgtk 60  
DSSP 1111hhhhhhhhhhhhhh1111hhhhhhhhhhhhhh111111hhhh11111hh

DSSP -----111111111h  
Query -----aapyspntl 11  
ident  
Sbjct iaekideflatgklrklekirqddtssinfltrvsgipsaarkfvddegiktledlrkn 120  
DSSP hhhhhhhhh1111hhhhhhhhhhhhhh111111hhhhhhhh1111hhhhhh1

DSSP hhhhhhhhhhh1111hhhhHHHHHHHHHHHHH-LLLL11LLEEEEEHHHHHHhh1  
Query rslrdr1tqvaerqgvfgrlqrHVAXIVVAQFAA-TLTDdtGAPLLLVKGSSELRrg 70  
ident | |  
Sbjct edklnhhqriglkyfgdfekriPREEMLQMQDIVLnEVKkVdSEYIATVCGSFRGA--- 177  
DSSP hhh11hhhhhhhhhhhh11eHHHHHHHHHHHHHHHHhh1LLEEEEEELLLLL---

DSSP 1111LLEEEEEEL-----1LHHHHHHHHHHHHhh1111eeEEELLEEL11  
Query ipdsrTSKDFATVAR-----rDIELIHEQLADAGetgwegftAIFTAPEEIaa 118  
ident | | | |  
Sbjct ---eSSGDMDVLLThpsftsestkqpkLLHQVVEQLQKVH-----FITDTLSKG-- 223  
DSSP ---1EELLEEEEEEE1111111111hHHHHHHHHHHHLL-----LEEEEEEL--

DSSP 1111LLEEEEEEEEEELL--EEEEEEEEEEEL-LLLL1111eeeee1hhhh11111lee  
Query pgxpVKPRRFTAKLSYRG--RAFATVPIEVSSV-EAGNAdqfdtlttsdalglvgpaava 175  
ident | |  
Sbjct ---ETKFMGVCQLPSKNdeKEYPHRRIDIRLIPKDQY----- 257  
DSSP ---LLEEEEEELLLLL11LLEEEEEEL1HHHH-----

DSSP ee11hHHHHhhhhhh1111111111hHHHHHH-----  
Query vpcxtiPWQIaqklhavtavleepkandrahdldLQLE----- 215  
ident  
Sbjct ---yCGVL-----yftgSDIFNKNmrahalekgftineytirp 292  
DSSP ---hHHHH-----hhhlHHHHhhhhhhhh1111eeleee11

DSSP --hhllhhhhhhhhHHHHhhhhhhllllLLLLLllllhhhhhhhhhhllllllllllhh  
Query --glldadlxptrSACIaifearaqhpWPPRVatlpwplyagalegldhlelartvd 273  
ident |  
Sbjct lgtgvageplpvdSEKD-----ifdYIQWK----- 318  
DSSP lllllllllllllllLHHH-----hhhHLLL-----

DSSP hhhhhhhhhhhhhhhllll  
Query aaaqavqrfvaridratkr 292  
ident  
Sbjct -----yrepkdrse 327  
DSSP -----llllllllll

No 236: Query=mol1A Sbjct=9icuA Z-score=6.7

[back to top](#)

DSSP -----  
Query ----- 0  
ident  
Sbjct etlngitdmltelanfeknvsqaihknayrkaasviakyphkiksgaeakklpgvgtk 60  
DSSP lllllhhhhhhhhhhhhhhhhllllhhhhhhhhhhhhhhhhllllllllhhhhhhllllllhh

DSSP -----llllllllllh  
Query -----aapyspsptnl 11  
ident  
Sbjct iaekideflatgklrklekirqddtsssinfptrvsgigpsaarkfydegiktledlrkn 120  
DSSP hhhhhhhhhhhllllhhhhhhhhhhhhhhhhllllllllhhhhhhhhhhllllllhhhhhhll

DSSP hhhhhhhhhhhhhllllhhhhhhHHHHHHHHHHHH-LLLLLLLLLLEEEHHHHHHHHhh  
Query rslrdrltqvaerqgvfgrlqRHVAXIVVAQFAA-TLDDTGAPLLLVKGGSSLELrrg 70  
ident | |  
Sbjct edklnhhqriglkyfgdfekriPREEMLMQDIVLnEVKKVDSEYIATVCGSFRRGA--- 177  
DSSP hhhllhhhhhhhhhhhhhhllleEHHHHHHHHHHHHHHHHHHHLLLLLEEEELLLLLLLL---

DSSP lllllLLLLLEEEEL-----lLHHHHHHHHHHHHhhllllleEEELLEELll  
Query ipdsrTSKDFATVAR-----rDIELIHEQLADAGetgwegftAIFTAPEEIaa 118  
ident | | | |  
Sbjct ---eSSGDMDVLLThpsftsestkpklLHQVVEQLQKVH-----FITDTLSKG-- 223  
DSSP ---lEELLEEEEEEe1llllllllllhhHHHHHHHHHHLL-----LEEEEEEEL---

DSSP lllllLLLLLEEEEEEELL--EEEEEEEEEEEL-LLLLllllleeeelhhhhllllllle  
Query pgxpVKPRRFTAKLSYRG--RAFATVPIEVSSV-EAGNadqfdtltsdalglvgpaava 175  
ident | |  
Sbjct ---ETKFMGVCQLPSKNdeKEYPHRRIDIRLIpKDQY----- 257  
DSSP ---LLEEEEEEELLLLLllllllLEEEEEEeHHHH-----

DSSP eeellhHHHHhhhhhhhhllllllllllllhhhhHHHHHH-----  
Query vpcxtiPWQIaqklhavtavlepkandrahdlyDLQLE----- 215  
ident  
Sbjct -----yCGVL-----yftgSDIFNKnmrahalekgftineytirp 292  
DSSP -----hHHHH-----hhllLHHHHhhhhhhhhllleelllllee

DSSP -hhllhhhhhhhhHHHHhhhhhhllllLLLLLllllhhhhhhhhhhllllllllllhh  
Query -glldadlxptrSACIaifearaqhpWPPRVatlpwplyagalegldhlelartvda 274  
ident  
Sbjct lgtgvageplpVDEK-----difDYIQW----- 317  
DSSP lllllllllllllllLHH-----hhhHLLL-----

DSSP hhhhhhhhhhhhhhhllll  
Query aaaqavqrfvaridratkr 292  
ident  
Sbjct -----kyrepkdrse 327  
DSSP -----llllllllll

No 237: Query=mol1A Sbjct=1zqkA Z-score=6.7

```

DSSP -----
Query ----- 0
ident
Sbjct etlnggitdmltelanfeknvsqaihkynayrkaasviakypkiksgaeakklpgvgtk 60
DSSP 1111hhhhhhhhhhhhhhhh1111hhhhhhhhhhhhhhhh111111hhhh11111hh

DSSP -----111111111h
Query -----aapyspntl 11
ident
Sbjct iaekideflatgklrklekirqddtsssinftrvsgigpsaarkfvdegiktledlrkn 120
DSSP hhhhhhhhh1111hhhhhhhhhhhhhhhh111111hhhhhhhhhh1111hhhhhh1

DSSP hhhhhhhhhhh1111hhhhHHHHHHHHHHHH-LLLL11LLLEEEHHHHHHhh1
Query rslrdrltqvaerqgvfgrlqRHVAXIVVAQFAA-TLTDdtGAPLLLKGGSSLELrrg 70
ident
Sbjct edklnhhqriglkygdfekriPREEMLMQDIVLnEVKKvdSEYIATVCGSFRRGA--- 177
DSSP hhh11hhhhhhhh1hhhh1leEHHHHHHHHHHHHHHHHH1LLEEEEELLLLL---

DSSP 1111LLLEEEEL-----1LHHHHHHHHHHhh1111eeEELLEEL11
Query ipdsrTSKDFATVAR-----rDIELIHEQLADAGetgwegftAIFTAPEEIaa 118
ident
Sbjct ---eSSGDMDVLLThpsftsestqpkLLHQVVEQLQKVH-----FITDTLSKG-- 223
DSSP ---1EELLEEEEL1111111111hhHHHHHHHHHL-----LEEEEEEEL--

DSSP 1111LLLEEEEEEEL--EEEEEEEEEEEL-LLLL1111eeehhh1111lee
Query pgxpVKPRRFATAKLSYRG--RAFATVPIEVSSV-EAGNadqfdtlttsdalglvgpaava 175
ident
Sbjct ---ETKFMGVCQLPSKNdeKEYPHRRIDIRLIpKDQY----- 257
DSSP ---LLEEEEEEELLLL11LLLEEEEEEEL1HHHH-----

DSSP eeellHHHHhhhhhh1111111111hhhhHHHHHH-----
Query vpcxtiPWQIaqlhavtavleekandrahdlyDLQLE----- 215
ident
Sbjct ---yCGVL-----yftgSDIFNKmrahaalekgftineytirp 292
DSSP ---hHHHH-----hh11LHHHHhhhhhhhh1leee1leee

DSSP -hh11hhhhhhHHHHhhhhhh1111LLLLL1111hhhhhhhh111111111hh
Query -glldadlxptRSACIaifearaqhpWPPRVAtlphwpliyagalegldhlelartvda 274
ident
Sbjct lgvtagveplpVDEK-----difDYIQWK----- 318
DSSP 1111111111LLHH-----hhHHLLL-----

DSSP hhhhhhhhhhh1111
Query aaqavqrfvaridratkr 292
ident
Sbjct -----yrepkdrse 327
DSSP -----111hh111

```

No 238: Query=mol1A Sbjct=7icsA Z-score=6.7

[back to top](#)

```

DSSP -----
Query ----- 0
ident
Sbjct etlnggitdmltelanfeknvsqaihkynayrkaasviakypkiksgaeakklpgvgtk 60
DSSP 1111hhhhhhhhhhhhhhhh1111hhhhhhhhhhhhhhhh111111hhhh11111hh

DSSP -----111111111h
Query -----aapyspntl 11
ident
Sbjct iaekideflatgklrklekirqddtsssinftrvsgigpsaarkfvdegiktledlrkn 120
DSSP hhhhhhhhh1111hhhhhhhhhhhhhhhh111111hhhhhhhhhh1111hhhhhh1

DSSP hhhhhhhhhhh1111hhhhHHHHHHHHHHHH-LLLL11LLLEEEHHHHHHhh1
Query rslrdrltqvaerqgvfgrlqRHVAXIVVAQFAA-TLTDdtGAPLLLKGGSSLELrrg 70

```

Sbjct edklnhhqriglkyfgdfekriPREEMLQMqDIVLnEVKkVdSEYIATVCGSFRFGA--- 177  
DSSP hhh11hhhhhhhhhhhhhh11eEHHHHHHHHHHHHHHHHHh1LLEEEELHHHHLL---

DSSP 11111LLEEEEEEEL-----1LHHHHHHHHHHHHhh1111eeEEELLEEL11  
Query ipdsrTSKDFATVAR-----rDIELIHEQLADAGetgwegftAIFTAPEEIIaa 118  
ident | | | | |  
Sbjct ---eSSGMDVLLThpsftsestkpqkLLHQVVEQLQKVH-----FITDTLSKG-- 223  
DSSP ---LEELLEEEEEEe1111111111hHHHHHHHHHHHLL-----LEEEEEEEL---

DSSP 1111LLEEEEEEEL--EEEEEEEEEEEL-LLLL1111eeeee1hhhh11111lee  
Query pgxpVKPRRFTAKLSYRG--RAFATVPIEVSSV-EAGNadqfdt1tsdalglvgvpaava 175  
ident | | | | |  
Sbjct ---ETKFMGVCQLPSKNdeKEYPHRRIDIRLIpKDQY----- 257  
DSSP ---LLEEEEEEELLLL1111LLEEEEEEeHHHH-----

DSSP ee11hHHHHhhhhhhhh1111111111hHHHHHHHH-----  
Query vpcxtiPWQIaqlhavtavleekandrahd1vDLQLE----- 215  
ident | | | | |  
Sbjct ----yCGVL-----yftgSDIFNKnmrahalekgftineytirp 292  
DSSP ----hHHHH-----hhh1LHHHHhhhhhhhh1lee1111eee

DSSP -hh11hhhhhhHHHHHHhhhh1111LLELL1111hHHHHhhhh1111111111hh  
Query -gl1ldadlxptRSACIAifearaqhpWPPRVat1phwpliyagalegldhlelartvda 274  
ident | | | | |  
Sbjct lgvTgvageplpVDEKd-----ifdYIQWK----- 318  
DSSP 11111111111LLEHHH-----hhhLLELL-----

DSSP hhhhhhhhhhhhh1111  
Query aaqavqrfvaridratkr 292  
ident | | | | |  
Sbjct -----yrepkdrse 327  
DSSP -----111111111

No 239: Query=mol1A Sbjct=9icgA Z-score=6.7

[back to top](#)

DSSP -----  
Query ----- 0  
ident | | | | |  
Sbjct etlnggitdmltelanfeknvsqaihknayrkaasviakypkiksgaeakklpgvgtk 60  
DSSP 1111hhhhhhhhhhhhhh1111hhhhhhhhhhhhhh111111hhhh111111hh

DSSP -----111111111h  
Query -----aapyspsptnl 11  
ident | | | | |  
Sbjct iaekideflatgklrklekirqddtssinfltrvsgigpsaarkfvdegiktledlrkn 120  
DSSP hhhhhhhhh1111hhhhhhhh1hhhhhhhh111111hhhhhhhh11111hhhhhh1

DSSP hhhhhhhhhhh1111hhhhHHHHHHHHHHHHH-LLLL11LLEEEHHHHHHhh1  
Query rslrdrltqvaerqgvfgrlqRHVAXIVVAQFAA-TLTDdtGAPLLLKGGSSLELrrg 70  
ident | | | | |  
Sbjct edklnhhqriglkyfgdfekriPREEMLQMqDIVLnEVKkVdSEYIATVCGSFRFGA--- 177  
DSSP hhh11hhhhhh11hhhh11LHHHHHHHHHHHHHHHHHh1LLEEEELHHHHLL---

DSSP 1111LLEEEEEEEL-----1LHHHHHHHHHHHHhh1111eeEEELLEEL11  
Query ipdsrTSKDFATVAR-----rDIELIHEQLADAGetgwegftAIFTAPEEIIaa 118  
ident | | | | |  
Sbjct ---eSSGMDVLLThpsftsestkpqkLLHQVVEQLQKVH-----FITDTLSKG-- 223  
DSSP ---LLEEEEEEe1111111111hHHHHHHHHHHHLL-----LEEEEEEEL---

DSSP 1111LLEEEEEEEL--EEEEEEEEEEEL-LLLL1111eeeee1hhhh11111lee  
Query pgxpVKPRRFTAKLSYRG--RAFATVPIEVSSV-EAGNadqfdt1tsdalglvgvpaava 175  
ident | | | | |  
Sbjct ---ETKFMGVCQLPSKNdeKEYPHRRIDIRLIpKDQY----- 257  
DSSP ---LLEEEEEEELLLL1111LLEEEEEEeHHHH-----

DSSP ee1lhHHHHhhhhhhhh1111111111hhhhHHHHH-----  
 Query vpcxtiPWQIaqklhavtavleepkandradlvDLQLE----- 215  
 ident  
 Sbjct ----yCGVL-----yftgSDIFNKmrahalekgftineytirp 292  
 DSSP ----hHHHH-----hh1LHHHHhhhhhhhh1111111111

DSSP -hh1lhHHHHHHHHHHhhhh1111LLLLL1111hhhhhhhh1111111111hh  
 Query -gl1ldadlxptRSACIaifearaqhpWPPRVatlphwpliyagalegldhlelartvda 274  
 ident  
 Sbjct lgvtgvageplpVDSEK-----ifdYIQWK----- 318  
 DSSP 1111111111LLH-----hhHLLLL-----

DSSP hhhhhhhhhhhhh1111  
 Query aaqavqrfvaridratkr 292  
 ident  
 Sbjct -----yrepkdrse 327  
 DSSP -----111hh111

No 240: Query=mol1A Sbjct=3c2kA Z-score=6.7

[back to top](#)

DSSP -----  
 Query ----- 0  
 ident  
 Sbjct tlnggitdmltelanfeknvsqaihkynayrkaasviakypkiksgaeakklpgvgtki 60  
 DSSP 111hhhhhhhhhhhh111hhhhhhhhhhhhhh1111111hhhh11111hh

DSSP -----111111111hh  
 Query -----aapysspptnlr 12  
 ident  
 Sbjct aekideflatgklrklekirqddtssinfltrvsgigpsaarkfvdegiktledlrkne 120  
 DSSP hhhhhhhhh111hhhhhh111hhhhhhhh1111111hhhhhhhh11111hhhhhhhh

DSSP hhhhhhhhhhh1111hhhhHHHHHHHHHHH-LLLL11LLLEEEHHHHHHHHh11  
 Query slrdrltqvaerqgvfgrlqRHXVAXIVVAQFAA-TLTDdtGAPLLLVKGGSSLELrgi 71  
 ident  
 Sbjct dklnhhqriglkyfgdfekriPREEMLQMQDIVLnEVKkvdSEYIATVCGSFRRGA---- 176  
 DSSP hh11hhhhhhhhhhhh11eHHHHHHHHHHHHHHHHhh1LLLEEEELHHHHL-----

DSSP 1111LLLEEEEL-----1LHHHHHHHHHHhh111leeEEELLEEL111  
 Query pdsrTSKDFATVAR-----rDIELIHEQLADAGetgwegftAIFTAPEEaap 119  
 ident  
 Sbjct ---eSSGDMVDLLThpsftsestqkplLHQVVEQLQKVH-----FITDLSKG--- 222  
 DSSP ---1EELLEEEEEE11lee1lee111HHHHHHHHHHHL-----LEEEEEEEL---

DSSP 1111LLLEEEEEEEL--LEEEEEEEL-LLLL111leeeelhhhh1111leee  
 Query gxpVKPRRFTAKLSYR--GRAFATVPIEVSSV-EAGNadqfdtltsdalglvgvpaavav 176  
 ident  
 Sbjct ---ETKFMGVCQLPSKndEKEYPHRRIDIRLIpKDQY----- 256  
 DSSP ---LLEEEEEE1111111111LEEEEEEEL1HHHH-----

DSSP ee1lhHHHHhhhhhh1111111111hhhhHHHHHHH-----  
 Query pcxtiPWQIaqklhavtavleepkandradlvDLQLEGL----- 218  
 ident  
 Sbjct ----yCGVL-----yftgSDIFNKMRAhalekgftineytirpl 292  
 DSSP ----hHHHH-----hh1LHHHHHHHHhhhhhhleee111leee1

DSSP ---1hhhhhhHHHHHHhhhh1111LLLLL1111hhhhhhhh1111111111hhhh  
 Query ---ldadlxptRSACIaifearaqhpWPPRVatlphwpliyagalegldhlelartvdaa 275  
 ident  
 Sbjct gvtgvageplpVDSEK-----difDYIQW----- 316  
 DSSP 1111111111LLH-----hhHLLLL-----

DSSP hhhhhhhhhhh1111  
 Query aqavqrfvaridratkr 292  
 ident





```

ident
Sbjct iaekideflatgklrklekirqddtssinfltrvtgigpsaarklvdegiktledlrkn 120
DSSP hhhhhhhhhhh1111hhhhhhhhhhhhhhhhhhhhhh11111hhhhhhhh11111hhhhhhhh

DSSP hhhhhhhhhhhhh1111hHHHHHHHHHHHHHHHHHHH-LLLL11LLLLEEEHHHHHHHHhh1
Query rslrdrltqvaerqgvfGRLQRHVAXIVVAQFAA-TLTDdtGAPLLLKVGSSLELrrg 70
ident | |
Sbjct edklnhhqriglkyfedfEKRIPREEMLQMqDIVLnEVKKldPEYIATVCGSFRRGA--- 177
DSSP hhh11hhhhhhhh11hhHLLLEHHHHHHHHHHHHHHHHHh1LLEEEELLLLLLLL---

DSSP 11111LLLLEEEEL-----1LHHHHHHHHHHHHhh1111eeEEELLEEL11
Query ipdsrTSKDFATVAR-----rDIELIHEQLADAGetgwegftAIFTAPEEIaa 118
ident | | | | |
Sbjct ---eSSGDMDVLLThpnftsesskqpkLLHRVVEQLQKVR-----FITDTLSKG-- 223
DSSP ---1EELLEEEEEE11111111111hHHHHHHHHHHHLL-----LEEEEEEELL--

DSSP 1111LLLLEEEEEEELLeEEEEEEEEEEEL-LLLL1111leeeelhhhh1111leee
Query pgxpVKPRRFTAKLSYRGrAFATVPIEVSSV-EAGNadqfdtlttsdalglvgvpaavap 177
ident | |
Sbjct ---ETKFMGVCQLPSEN-EYPHRRIDIRLIpKDQY----- 254
DSSP ---LLEEEEEEELLLL-LLEEEEEEEL1HHHH-----

DSSP e11hHHHHhhhhhhhh11111111111HHHHHHH-----hhhhh1
Query cxtiPWQIaqklhavtavleepkandraHDLVDLQ-----lleg11 218
ident |
Sbjct ---yCGVL-----yftgSDIFNKNmrahalekgftineytirplgvtgv 295
DSSP ---hHHHH-----hhh1LHHHHHHHHHHhh1leee111leee111111

DSSP 1hHHHHhhHHHHhhhhhh1111LLLLL1111hhhhhhhh111111111hhhhhhhh
Query ldADLXptRSACIaifearaqhpWPPRVatlpwhplyagaleglhdhlelartvdaaaqa 278
ident |
Sbjct agEPLP--VDSEQ-----difDYIQW----- 314
DSSP 11LLLL--LLLHH-----hhHHLLL-----

DSSP hhhhhhhhh1111
Query vqrfvaridrskr 292
ident
Sbjct ---ryrepkdrse 324
DSSP ---1111hhhh111

```

No 243: Query=mol1A Sbjct=4rpxA Z-score=6.7

[back to top](#)

```

DSSP -----
Query ----- 0
ident
Sbjct tlnggitdmltelanfeknvsqaihkynayrkaasviakyphkiksgaeakklpgvgtki 60
DSSP 111hhhhhhhhhhhhhhhh1111hhhhhhhhhhhhhhhh11111hhhhhh11111hhh

DSSP -----111111111hh
Query -----aapyspntlr 12
ident
Sbjct aekideflatgklrklekirqddtssinfltrvsgigpsaarkfvdegiktledlrkne 120
DSSP hhhhhhhhhhh111hhhhhhhh11hhhhhhhhhh11111hhhhhhhh11111hhhhhhhh

DSSP hhhhhhhhhhh1111hhhhHHHHHHHHHHHHHHH-LLLL11LLLLEEEHHHHHHHHhh1
Query slrdrltqvaerqgvfgrlqRHVAXIVVAQFAA-TLTDdtGAPLLLKVGSSLELrri 71
ident | |
Sbjct dklnhhqriglkyfgdfekriPREEMLQMqDIVLnEVKKvdSEYIATVCGSFRRGA---- 176
DSSP hh11hhhhhhhh11hhhh11eEHHHHHHHHHHHHHHHHHh1LLEEEELHHHHLLL----

DSSP 1111LLLLEEEEL-----1LHHHHHHHHHHHHhh1111eeEEELLEEL1111
Query pdsrTSKDFATVAR-----rDIELIHEQLADAGetgwegftAIFTAPEEiaap 119
ident | | | | |
Sbjct ---eSSGDMDVLLThpsftsestqkpkLLHQVVEQLQKVH-----FITDTLSK---- 221
DSSP ---1EELLEEEEEE11111111111HHHHHHHHHHHLL-----LEEEEEEEL----

```





```

Query  rslrdrltqvaerqgvfgrlqRHVAXIVVAQFAA-TLTDdtGAPLLLKGGSSLELrrg  70
ident
Sbjct  edklnhhqriglkygdfekriPREEMLMQDIVLnEVKKvdSEYIATVCGSFRRGA--- 177
DSSP  hhhllhhhhhhhhhhhhhhllleEHHHHHHHHHHHHHHHHHh1LLEEEELHHHHLLL---

DSSP  1111LLEEEEEEEL-----1LHHHHHHHHHHHHhh1111eeEEELLEEL11
Query  ipdsrTSKDFATVAR-----rDIELIHEQLADAGetgwegftAIFTAPEEIaa  118
ident
Sbjct  ---eSSGDMDVLLThpsftsestkpqkLLHQVVEQLQKVH-----FITDTLSKG-- 223
DSSP  ---1EELLEEEEEEe1111111111hHHHHHHHHHHHLL-----LEEEEEEEL--

DSSP  1111LLEEEEEEEL--EEEEEEEEEEEL-LLLL1111eeeee1hhhh1111lee
Query  pgxpVKPRRFTAKLSYRG--RAFATVPIEVSSV-EAGNadqfdtltsdalgvvpaava  175
ident
Sbjct  ---ETKFMGVCQLPSKNdeKEYPHRRIDIRLIpKDQY-----257
DSSP  ---LLEEEEEEELLLL1111LLEEEEEEeHHHH-----

DSSP  eeellHHHHhhhhhhhh11111111111hhhhHHHHHH-----
Query  vpcxtiPWQIaqlhavtavleekandrahdlyDLQLE-----215
ident
Sbjct  ---yCGVL-----yftgSDIFNKnmrahaalekgftineytirp  292
DSSP  ---hHHHH-----hh11LHHHHhhhhhhhh1111lee1leell

DSSP  --hhllhhhhhhhhHHHHhhhhhh1111LLELL11111hhhhhhhh111111111hh
Query  --gllldadlxptrSACIaifearaqhpWPPRVatlpwplyagalegldhlelartvd  273
ident
Sbjct  lgvtgvageplpvdSEKD-----ifdYIQWK-----318
DSSP  11111111111111LHHH-----hhhLLLL-----

DSSP  hhhhhhhhhhhhhhh1111
Query  aaaqavqrfvaridratkr  292
ident
Sbjct  -----yrepkdrse  327
DSSP  -----111hhh111

```

No 247: Query=mol1A Sbjct=8ickA Z-score=6.7

[back to top](#)

```

DSSP -----
Query ----- 0
ident
Sbjct  etlnggitdmltelanfeknvsqaihkynayrkaasviakyphkiksgaeakklpgvgtk  60
DSSP  1111hhhhhhhhhhhhhhhh111hhhhhhhhhhhhhhhh111111hhhh111111hh

DSSP -----1111111111h
Query -----aapyspsptnl  11
ident
Sbjct  iaekideflatgklrklekirqddtsssinftrvsgigpsaarkfvdegiktledlrkn  120
DSSP  hhhhhhhhh1111hhhhhhhhhhhhhhhh111111hhhhhhhh1111hhhhhh1

DSSP  hhhhhhhhhhh1111hhhhHHHHHHHHHHHHH-LLLL11LLEEEHHHHHHHHhh1
Query  rslrdrltqvaerqgvfgrlqRHVAXIVVAQFAA-TLTDdtGAPLLLKGGSSLELrrg  70
ident
Sbjct  edklnhhqriglkygdfekriPREEMLMQDIVLnEVKKvdSEYIATVCGSFRRGA--- 177
DSSP  hhhllhhhhhhhhhhhhhhllleEHHHHHHHHHHHHHHHHHh1LLEEEELLLL1111---

DSSP  1111LLEEEEEEEL-----1LHHHHHHHHHHHHhh1111eeEEELLEEL11
Query  ipdsrTSKDFATVAR-----rDIELIHEQLADAGetgwegftAIFTAPEEIaa  118
ident
Sbjct  ---eSSGDMDVLLThpsftsestkpqkLLHQVVEQLQKVH-----FITDTLSKG-- 223
DSSP  ---1EELLEEEEEEe1111111111hHHHHHHHHHHHLL-----LEEEEEEEL--

DSSP  1111LLEEEEEEEL--EEEEEEEEEEEL-LLLL1111eeeee1hhhh1111lee
Query  pgxpVKPRRFTAKLSYRG--RAFATVPIEVSSV-EAGNadqfdtltsdalgvvpaava  175
ident
Sbjct  ---ETKFMGVCQLPSKNdeKEYPHRRIDIRLIpKDQY-----257

```

DSSP ee11hHHHHhhhhhhhh1111111111hHHHHHHH-----  
Query vpcxtiPWQIaqlhavlavleekandrahdLvDLQLE----- 215  
ident  
Sbjct -----yCGVL-----yftgSDIFNKnmrahalekgftineytirp 292  
DSSP -----hHHHH-----hhh1LHHHHHHhhhhhhhh1leee1leeee

DSSP -hh11hhhhhhHHHHHHhhhh1111LLLLL1111hhhhhhhh1111111111hhh  
Query -gl1ldadlxptRSACIAifearaqhpWPPRVAtlphwplyagalegldhlelartvda 274  
ident  
Sbjct lgvTgvageplpVDSEK-----ifdYIQWK----- 318  
DSSP 1111111111111111LHHH-----hhhHLLL-----

DSSP hhhhhhhhhhhhh1111  
Query aaqavqrfvaridratkr 292  
ident  
Sbjct -----yrepkdrse 327  
DSSP -----111hhhh111

No 248: Query=mol1A Sbjct=4nlkA Z-score=6.7

[back to top](#)

DSSP -----  
Query ----- 0  
ident  
Sbjct tlnggitdmltelanfeknvsqaihkynayrkaasviakyphkiksgaeakklpgvgtki 60  
DSSP 111hhhhhhhhhhhhhhhh1111hhhhhhhhhhhhhh11111111hhhh111111hh

DSSP -----1111111111hh  
Query -----aapyspntlr 12  
ident  
Sbjct aekideflatgklrklekirqddtssinflttrvsgigpsaarkfvdegiktledlrkne 120  
DSSP hhhhhhhhhhh111hhhhhhhh1hhhhhhhhhh111111hhhhhhhh111111hhhh11h

DSSP hhhhhhhhhhh111hHHHHHHHHHHHHHHHHH-LLLL11LLLEEEHHHHHHhh11  
Query slrdrltqvaerqgvfGRLQRHVAXIVVAQFAA-TLTDdtGAPLLLKGGSSLELrrgi 71  
ident | |  
Sbjct dklnnhqriglkyfgdfEKRIPREEMLQMqDIVLnEVKkdSEYIATVCGSFRRGA---- 176  
DSSP hh11hhhhhhhh11hhhhLLEEEHHHHHHHHHHHHHHHH11LLLEEEELHHHHLLL----

DSSP 1111LLLEEEEL-----1LHHHHHHHHHHHHhh1111eeEEELLEEL111  
Query pdsrTSKDFATVAR-----rDIELIHEQLADAGetgwegftAIFTAPEElaap 119  
ident | | | |  
Sbjct ---eSSGDMDVLLThpsftsestqkplLHQVVEQLQKVH-----FITDTLSKG--- 222  
DSSP ---1EELLEEEEL1111111111111111LHHHHHHHHHLL-----LEEEEEEEL---

DSSP 1111LLLEEEEEEEL--LEEEEEEEL-LLLL1111eeeee1hhhh111111lee  
Query gxpVKPRRFTAKLSYR--GRAFATVPIEVSSV-EAGNadqfdtlttsdalglvgpaavav 176  
ident | |  
Sbjct ---ETKFMGVCQLPSKndEKEYPHRRIDIRLlpKDQY----- 256  
DSSP ---LEEEEEEELLLL1111111111111111LHHHHHHHHHH-----

DSSP ee11hHHHHhhhhhhhh111111111111HHHHHHH-----hhhhh  
Query pcxtiPWQIaqlhavlavleekandraHDLVDLQ-----llegl 217  
ident |  
Sbjct ----yCGVL-----yftgSDIFNKnmrahalekgftineytirplgvtg 296  
DSSP ----hHHHH-----hhh1LHHHHHHhhhhhhhh1leee1111ee11111

DSSP 11hHHHHhhHHHHhhhhhh1111LLLLL1111hhhhhhhh1111111111hhhhhh  
Query 1ldADLXptRSACIAifearaqhpWPPRVAtlphwplyagalegldhlelartvdaaaq 277  
ident |  
Sbjct vagEPLP--VDSEK-----difdYIQWK----- 317  
DSSP 1111LLL--LLLH-----hhhHLLL-----

DSSP hhhhhhhhhhh1111

ident  
 Sbjct -----yrepkdrse 326  
 DSSP -----111hhhh111

No 249: Query=mol1A Sbjct=3v72A Z-score=6.7

[back to top](#)

```
DSSP -----
Query ----- 0
ident
Sbjct etlnggitdmlvelanfeknvsqaihkynayrkaasviakyphkiksgaeakklpgvgtk 60
DSSP 1111hhhhhhhhhhhhhhhh1111hhhhhhhhhhhhhh1111111hhhhhh11111hh
```

```
DSSP -----111111111h
Query -----aapyspptnl 11
ident
Sbjct iaekideflatgklrklekirkdtdssinfltrvtgigpsaarklvdegiktledlrkn 120
DSSP hhhhhhhhhhh11hhhhhhhhhhhhhhhh111111hhhhhhhhhh1111hhhhhh11
```

```
DSSP hhhhhhhhhhh1111hHHHHHHHHHHHHHHHHL-LLLLLLLLLLEEHHHHHHHHhh1
Query rslrdrltqvaerqgvvfGRLQRHVAXIVVAQFAAT-LTDDTGAPLLLVKGGSSLELrrg 70
ident
Sbjct edklnhhqrigrlyfedfEKRIPREEMLMQDIVLNeVKKLDPEYIATVCGSFRGA--- 177
DSSP hhh11hhhhhhhhhhhhHLLLEHHHHHHHHHHHHHHHHHLLLEEEELHHHHHLL---
```

```
DSSP 111111LLEEEEEEL-----1LHHHHHHHHHHHHhh1111eeEEEELLEEL11
Query ipdsrTSKDFATVAR-----rDIELIHEQLADAGetgwegftAIFTAPEEIaa 118
ident
Sbjct ---eSSGDMDVLLThpnftsesskqpkLLHRVVEQLQKVR-----FITDTLSKG-- 223
DSSP ---1EELLEEEEEEL1111111111hHHHHHHHHHHHLL-----LEEEEEEL--
```

```
DSSP 1111LLEEEEEEEEEEEL--EEEEEEEEEEEEL-LLLL1111eeeeelhhhh11111lee
Query pgxpVKPRRFTAkLSYRG--RAFATVPIEVSSV-EAGNadqfdtlttsdalglvgvpaava 175
ident
Sbjct ---ETKFMGVCQLPSENDENEYPHRRIDIRLIpKDQY----- 257
DSSP ---LLEEEEEELLLL11LLLLEEEEEEEEELHHHH-----
```

```
DSSP eeellhHHHHhhhhhhhh1111111111hhhhHHHHHH-----
Query vpcxtiPWQIaqkhhavtavleekandrahdlvDLQLE----- 215
ident
Sbjct ---yCGVL-----yftgSDIFNKmrahalekgftinkytirp 292
DSSP ---hHHHH-----h111LHHHHhhhhhhhhhhleeelllee
```

```
DSSP -hh11hhhhhhhhhhHHHHhhhhhh11LLLLL11111hhhhhhhh111111111hh
Query -gl1ldadlxptrsACIAifearaqhPWPPRvatlphwplyagalegldhlehlarvd 274
ident
Sbjct lgvtagveplpvdSEQD-----ifdYIQWR----- 318
DSSP 111111111111LHHH-----hhhHLLL-----
```

```
DSSP hhhhhhhhhhhhh1111
Query aaqavqrfrvaridratkr 292
ident
Sbjct -----yrepkdrse 327
DSSP -----111hhhh11
```

No 250: Query=mol1A Sbjct=4nm1A Z-score=6.7

[back to top](#)

```
DSSP -----
Query ----- 0
ident
Sbjct tlnggitdmltelanfeknvsqaihkynayrkaasviakyphkiksgaeakklpgvgtki 60
DSSP 111hhhhhhhhhhhhhhhh111hhhhhhhhhhhhhh1111111hhhh11111hh
```

```

DSSP -----11111111hh
Query -----aapyspptnlr 12
ident
Sbjct aekideflatgklrklekirqddtssinflttrvsgigpsaarkfvdegiktledlrkne 120
DSSP hhhhhhhhhhh111hhhhhhhhhhhhhhhhhhhhhh111111hhhhhhhhhh11111hhhhhhhhhh

DSSP hhhhhhhhhhh1111hHHHHHHHHHHHHHHHHHLLL-----LLEEEHHHHHHHHhh11
Query slrdrltqvaerqgvvFGRLQRHVAXIVVAQFAAT-LTDDTGAPLLLKGGSSLELrrgi 71
ident | |
Sbjct dklnhhqrigrlyfgdfEKRIPREEMLQMQDIVLNeVKKVDSEYIATVCGSFRRGA---- 176
DSSP hhl1hhhhhhhh11hhhhLLEEEHHHHHHHHHHHHHhHHHLLLEEEELHHHHLLL-----

DSSP 1111LLEEEEEEEL-----1LHHHHHHHHHHHHhh1111eeEEELLLEEL111
Query pdsrTSKDFATVAR-----rDIELIHEQLADAGetgwegftAIFTAPEElaap 119
ident | | |
Sbjct ---eSSGDMVLLThpsftsestkqpkLLHQVVEQLQKVH-----FITDTLSKG--- 222
DSSP ---1EELLEEEEEE1111111111111111HHHHHHHHHHHLL-----LEEEEEEEL---

DSSP 111LLEEEEEEEL--LEEEEEEEL-LLLL1111eeehhh1111lee
Query gxpVKPRRFTAKLSYR--GRAFATVPIEVSSV-EAGNadqfdtlttsdalglvgvpaav 176
ident | |
Sbjct ---ETKFMGVCQLPSKndEKEYPHRRIDIRLIpKDQY----- 256
DSSP ---LLEEEEEE1111111111111111LLEEEEEEEL1HHHH-----

DSSP eellhHHHHhhhhhhhh111111111111HHHHHH-----hhhhh
Query pcxtiPWQIaqkIhavtavleepkandraHDLVDLQ-----llegl 217
ident |
Sbjct ----yCGVL-----yftgSDIFNKNmrahaalekgftineytirplgvtg 296
DSSP ----hHHHH-----hhlLHHHHHHhhhhhhhh1lee1111lee1111

DSSP 11hHHHHhhHHHHhhhhhh1111LLELLL1111hhhhhhhh1111111111hhhhhh
Query lldADLXptRSACIaifearaqhpWPPRVAAtlphwpliyagalegldhlelartvdaaaq 277
ident |
Sbjct vagEPLP--VDSEK-----difDYIQWK----- 317
DSSP 111LLELL--LLHH-----hhhHLLL-----

DSSP hhhhhhhhhhh1111
Query avqrfvaridratkr 292
ident
Sbjct -----yrepkdrse 326
DSSP -----111hhhh111

```

No 251: Query=mol1A Sbjct=4nxzA Z-score=6.7

[back to top](#)

```

DSSP -----
Query ----- 0
ident
Sbjct tlnggitudmltelanfeknvsqaihkynayrkaasviakyphkiksgaeakklpgvgtki 60
DSSP 111hhhhhhhhhhhhhhhhhhhhhh111hhhhhhhhhhhhhhhhhhhh111111hhhhhh11111hhhh

DSSP -----11111111hh
Query -----aapyspptnlr 12
ident
Sbjct aekideflatgklrklekirqddtssinflttrvsgigpsaarkfvdegiktledlrkne 120
DSSP hhhhhhhhhhh111hhhhhhhhhhhhhhhhhhhhhh111111hhhhhhhhhh11111hhhhhhhhhh

DSSP hhhhhhhhhhh1111hHHHHHHHHHHHHHHHHHLLL-----LLEELLEEHHHHHHhh11
Query slrdrltqvaerqgvvFGRLQRHVAXIVVAQFAAT-LTDDtGAPLLLKGGSSLELrrgi 71
ident | |
Sbjct dklnhhqrigrlyfgdfEKRIPREEMLQMQDIVLNeVKKVdSEYIATVCGSFRRGA---- 176
DSSP hhl1hhhhhhhh111hhLLEEEHHHHHHHHHHHHHhHLL1LLEEEELHHHHLLL-----

DSSP 1111LLEEEEEEEL-----1LHHHHHHHHHHHHhh1111eeEEELLLEEL111
Query pdsrTSKDFATVAR-----rDIELIHEQLADAGetgwegftAIFTAPEElaap 119
ident | | |

```





Query 1ldADLXPTrSACIaifearaqhPWPPRVatlphwplyagalegldhlelartvdaaaq 277  
ident |  
Sbjct vagEPLPV--DSEK-----difdYIQWKY----- 318  
DSSP 111LLLLL--LLHH----hhhhLLLLLL-----

DSSP hhhhhhhhhhh1111  
Query avqrfvaridratkr 292  
ident  
Sbjct -----repkdrse 326  
DSSP -----11hhh111

No 253: Query=mol1A Sbjct=4ph5A Z-score=6.7

[back to top](#)

DSSP -----  
Query ----- 0  
ident  
Sbjct tlnggitdmltelanfeknvsqaihkynayrkaasviakyphkiksgaeakklpgvgtki 60  
DSSP 111hhhhhhhhhhhhhhhh111hhhhhhhhhhhhhhhh1111111hhhhh11111hh

DSSP -----111111111hh  
Query -----aapyspntnr 12  
ident  
Sbjct aekideflatgklrklekirqdtssinfltrvsgigpsaarkfvdegiktledlrkne 120  
DSSP hhhhhhhhh111hhhhhhhhhhhhhhhh111111hhhhhhhh11111hhhhhh11h

DSSP hhhhhhhhhhh1111hhhhHHHHHHHHHHHHHH--LLLL11LLLLEEEEHHHHHHHHhh11  
Query slrdrltqvaerqgvfgrlqRHXVAXIVVAQFAA-TLTDdtGAPLLLKGGSSLELrrgi 71  
ident | |  
Sbjct dklnhhqriglkyfgdfekriPREEMLMQDIVLnEVKKvdSEYIATVCGSFRRGA---- 176  
DSSP hhl1hhhhhhhh111hhhl1eHHHHHHHHHHHHHHHHHH11LLEEEELHHHHLLL----

DSSP 111LLLLLEEEEEEL-----1LHHHHHHHHHHHHhh111leeEEELLEE1111  
Query pdsRTSKDFATVAR-----rDIELIHEQLADAGetgwegftAIFTAPEEiaap 119  
ident | | | |  
Sbjct ---ESSGMDVLLThpsftsestkpqkLLHQVVEQLQKVH-----FITDTLSK---- 221  
DSSP ---LEELLEEEEE111111111111HHHHHHHHHHHLL-----LEEEEEEE----

DSSP 111LLEEEEEEEEEEL--LEEEEEEEEEEEEL-LLLL111leeeelhhhh1111lee  
Query gxpVKKRRFTAKLSYR--GRAFATVPIEVSSV-EAGNadqfdtltsdalglvgvpaavav 176  
ident | |  
Sbjct --gETKFMGVCQLPSKndEKEYPHRRIDIRLIpKDQY----- 256  
DSSP --LLEEEEEELLLL11LLLLLLEEEEEEL1HHHH-----

DSSP eel1hHHHHhhhhhhhh1111111111HHHH-----hhhhhhh  
Query pcxtiPWQIaqklhavtavleepkandraHDLV-----dlqllegl 217  
ident |  
Sbjct ----yCGVL-----yftgSDIFnknmrahaalekgftineytirplgvtg 296  
DSSP ----hHHHH-----hhhlLHHHHhhhhhhhhhh1leeel11eeel1111

DSSP 11hHHHHhhHHHHhhhhhh111LLLLL11111hhhhhhhh111111111hhhhh  
Query 1ldADLXPTrSACIaifearaqhPWPPRVatlphwplyagalegldhlelartvdaaaq 277  
ident |  
Sbjct vagEPLPV--DSEK-----difdYIQWKY----- 318  
DSSP 111LLLLL--LLHH----hhhhLLLLLL-----

DSSP hhhhhhhhhhh1111  
Query avqrfvaridratkr 292  
ident  
Sbjct -----repkdrse 326  
DSSP -----11hhh111

No 254: Query=mol1A Sbjct=4k4hI Z-score=6.7

```

DSSP -----
Query ----- 0
ident
Sbjct atnlnhiteklevlakaysvqgdkwralgyakainalksfhkpvtsyqeacsipgigkr 60
DSSP 11111hhhhhhhhhhhhhhhh111hhhhhhhhhhhhhhhh1111111hhhh11111hh

DSSP -----111111111hhhh
Query -----aapyspptnlrs1 14
ident
Sbjct maekiiieilesghlrkldhisesvvpvelfsniwgagtktaqmwyqqgfrsledirsqs 120
DSSP hhhhhhhhhhh111hhhh111hhhhhhhh111111hhhhhhhh1111hhhhhh11

DSSP hhhhhhhhh1111hhhhHHHHHHHHHHHHHHH-LLLL11LLLLEEEHHHHHHhh1111
Query rdr1tqvaerqgvfgrlqRHVAXIVVAQFAA-TLTDdtGAPLLLVKGGSSLElrrgipd 73
ident
Sbjct lttqqaiglkhysdflermPREEATEIEQTVQkAAQafnSGLLCVACGSYRRG----- 173
DSSP 11hhhhhhhh1hhhh1leHHHHHHHHHHHHHHHHHH1LLLLEEEELHHHHLL-----

DSSP LLLLLLEEEEL-----1LHHHHHHHHHHHHhh111leeEEELLE-ELLL11LLL
Query SRTSKDFATVAR-----rDIELIHEQLADAGetgwegftAIFTAPE-EIAApGXPVK 124
ident
Sbjct KATCGDVDVLITHpdgrshrgIFSRLDLSLRQEG-----FLTDDLvsQEEN--GQQQ 223
DSSP LLEELLEEEEL11111111HHHHHHHHHHHLL-----LEEEEEEeEEEE--LLEE

DSSP LEEEEEEEE1EEEEEEEEEEEL-LLLL1111eeee1hhhh11111eeee1hHH
Query PRRFTAKLSYrgRAFATVPIEVSSV-EAGNadqfdtltsdalglvgvpaavavpctiPW 183
ident
Sbjct KYLGVCRLPG--PGRRRRLDIIVVpYSEF-----aCA 254
DSSP EEEEEELLL--LLLLEEEEEEEL1HHHH-----hHH

DSSP HHHhhhhhh1111111111HHHH-----hhhhhhh1
Query QIaqklhavtavleepkandraHDLV-----dlqllegl1 218
ident
Sbjct LL-----yftgSAHFnrsmralaktkgmslsehalstavrnrthgckvg 298
DSSP HH-----hhlLHHHHhhhhhhhhhh1lee111lee1111111111

DSSP 1hhHHHHhhHHHHhhhhhh111LLL111111hhhhhhhh11111111hhHHHH
Query ldaDLXPtrSACIaifearaqHPWPPRvatlphwpliyagalegldhlelartvdaAAQA 278
ident
Sbjct pgrVLPT--PTEK----dvfrLLGLP-----yrepardwLEHH 331
DSSP 111EEL--LHH--hhhhLLLL-----111hh111LLL

DSSP hhhhhhhhh1111
Query vqrfvaridratkr 292
ident
Sbjct -----h 332
DSSP -----l

```

No 255: Query=mol1A Sbjct=3rh5A Z-score=6.7

[back to top](#)

```

DSSP -----
Query ----- 0
ident
Sbjct tlnggitdmltelanfeknvsqaihknayrkaasviakyphkiksgaeakklpgvgtki 60
DSSP 111hhhhhhhhhhhhhhhh111hhhhhhhhhhhhhhhh111111hhhh11111hh

DSSP -----111111111hh
Query -----aapyspptnlr 12
ident
Sbjct aekideflatgklrklekirqddtssinflttrvsgigpsaarkfvdegiktledlrkne 120
DSSP hhhhhhhhh111hhhh111hhhhhhhh111111hhhhhhhh1111hhhh11h

DSSP hhhhhhhhh1111bHHHHHHHHHHHHHHHHH-LLLL11LLLLEEEHHHHHHhh11
Query slrdrltqvaerqgvfGRLQRHVAXIVVAQFAA-TLTDdtGAPLLLVKGGSSLElrrgi 71

```

Sbjct dklnhhqriglkyfgdfEKRIPREEMLQMQDIVLnEVKkvdSEYIATVCGSFRRGA---- 176  
DSSP hhl1hhhhhhhh1hhhhHLEEEHHHHHHHHHHHHHHHHHh1LLEEEELHHHHLLL----

DSSP 1111LLEEEEL-----1LHHHHHHHHHHHHhh1111eeEELLEEL111  
Query pdsrTSKDFATVAR-----rDIELIHEQLADAGetgwegftAIFTAPEElaap 119  
ident | | | | |  
Sbjct ---eSSGDMVLLThpsftsetkqpkLLHQVVEQLQKVH-----FITDTLSKG--- 222  
DSSP ---1EELLEEEEEE1111111111HHHHHHHHHHLL-----LEEEEEEEL---

DSSP 111LLEEEEEEEL--LEEEEEEEL-LLLL1111eeeee1hhhh11111eee  
Query gxpVKPRRFTAKLSYR--GRAFATVPIEVSSV-EAGNadqfdt1tsdalglvgvpaavav 176  
ident | | | | |  
Sbjct ---ETKFMGVCQLPSKndEKEYPHRRIDIRLlpKDQY----- 256  
DSSP ---LLEEEEEE1111111111LLEEEEEEEL1HHHH-----

DSSP eellhHHHHhhhhhhhh1111111111HHHHHHH-----hhhhh  
Query pcxtiPWQIaqlkhavtavleekandraHDLVDLQ-----llegl 217  
ident | | | | |  
Sbjct ---yCGVL-----aftgSDIFNKNmrahalekgftineytirplgvtg 296  
DSSP ---hHHHH-----hhh1LHHHHHHhhhhhh11ee1111eee11111

DSSP 11hHHHHhhHHHHhhhhhh1111LLELL1111hhhhhhhh1111111111hhhhhh  
Query 1ldADLXptRSACIaifearaqhpWPPRVAtlphwpliyagalegldhlelartvdaaaq 277  
ident | | | | |  
Sbjct vagEPLP--VDSEK-----difDYIQWK----- 317  
DSSP 111LLL--LLLH-----hhHLLL-----

DSSP hhhhhhhhh1111  
Query avqrfvaridratkr 292  
ident  
Sbjct -----yrepkdrse 326  
DSSP -----111hhhh11

No 256: Query=mol1A Sbjct=4ycxA Z-score=6.7

[back to top](#)

DSSP -----  
Query ----- 0  
ident  
Sbjct wmpayacqrptplthhntglsealeilaagfegsegrlltfcraasvkalpsvttl 60  
DSSP 1111hhhh11111111hhhhhhhhhhhhhh11hhhhhhhhhhhhhh111111h

DSSP -----  
Query ----- 0  
ident  
Sbjct sqlqglphfgehssrvvqellehgvceeverrseryqtmklftqifgvvktadrwyr 120  
DSSP hhh1111111hhhhhhhhhhhh11hhhhhhhh1hhhhhhhh111111hhhhhhhh

DSSP -111111111hhhhhhhhhh1111hHHHHHHHHHHHHHHHLL-LLLL1LLEEE  
Query -aapyspntlrsldr1tqvaerqgvvfGRLQRHVXIVVAQFAAT-LTDDtGAPLLL 58  
ident | | | | |  
Sbjct eglrtlddlreqpqltqqkag1qhhqd1STPVLRSVDALQQVVEEaVGQA1PGATVT 180  
DSSP 11111hhhh11hh11hhhhhh1hhhhLLEEEHHHHHHHHHHHHHHHH1LLEEE

DSSP EEEHHHHHHhh11111LLEEEEL-----1LHHHHHHHHHHHHhh1111eeEE  
Query VKGGSLELrrgipdsrTSKDFATVAR-----rDIELIHEQLADAGetgwegftaIF 110  
ident | | | | |  
Sbjct LTGFRRGK-----1QGHVDVFLIThpkegqeagLLPRVMCRLQDQG-----LI 224  
DSSP ELHHHHLLL-----1EELLEEEEEE11111111LHHHHHHHHHHLL-----LE

DSSP LLEEL1111LLEEEEEEELLeEEEEEEL-LLLL1111eeeee1hhhh11  
Query TAPEElaapXPVKPRRFTAKLSYRGRaFATVPIEVSSV-EAGNadqfdt1tsdalglvg 169  
ident | | | | |  
Sbjct LYHQHQ--hSAFERSFCIFRLPQPGS-WKAVRVDLVVapVSQF----- 264  
DSSP EEEEE--LLEEEEEEELLe-EEEEEEEL1LLH-----

DSSP 1111e11hHHHHhhhhhhhh1111111111HHHHHHH-----h  
Query vpaavavpcxtiPWQIaqlhvtavleepkandraHDLVDLQ-----l 213  
ident |  
Sbjct -----pFALL-----gwtgSKLFQRElrrfsrkekgwlshg 297  
DSSP -----hHHHH-----h11LHHHHHHhhhhhhhh11e1111

DSSP hhhh11hHHHHhhHHHHhhhhhh1111LLLLL1111hhhhhhhh1111111111hh  
Query leg11ldADLXptRSACIaifearaqhpWPPRVAtlphwpliayagalegldhlelartvd 273  
ident |  
Sbjct lfdpeqkTFFQ--AASEE-----difRHGLG----- 322  
DSSP ee1111EELL--LLLHH-----h11HLLLL-----

DSSP hhhhhhhhhhhhhhh1111  
Query aaavqrfvaridratkr 292  
ident |  
Sbjct -----ylppeqrna 331  
DSSP -----111hhhh11

No 257: Query=mol1A Sbjct=5ca7B Z-score=6.7

[back to top](#)

DSSP -----1111111111hhhhhhhhhhhh1111hHHHHH  
Query -----aapysspntlrslrdrltqvaerqgvfGRLQR 34  
ident |  
Sbjct sesvplvelfsniwagtktaqmwyqgfrsleldirsqaslttqqaiglkhysdfLERMP 60  
DSSP 11hhhhhhhh111111hhhhhhhh1111hhhhhh1111hhhhhh11hhhhHLEE

DSSP HHHHHHHHHHHHLL-LLLLLLLEEEHHHHHHhh111111LLEEEEL-----  
Query HVAXIVVAQFAATL-TDDTGAPLLLVKGGSSLELrrgipdsrTSKDFATVAR----- 85  
ident | | | | | | | | | |  
Sbjct REEATEIEQTVQKaAQAFNSGLLCVACGSYRRGK-----aTCGDVDVLIThpdgrshr 113  
DSSP HHHHHHHHHHHHHhhHHLLLEEEELHHHHLL-----1EELLEEEEE11111111

DSSP 1LHHHHHHHHHHHHhh1111eeEEELLEELL11LLLLLEEEEEE11EEEEEEEE  
Query rDIELIHEQLADAGetgewftAIFTAPEEIAApgXPVKPRRFTAKLSYrgRAFATVPIE 145  
ident | | | | | | | | | |  
Sbjct gIFSRLLDSLQEG-----FLTDDLVSQEE-nGQQKYLGVCRPLG--PGRRHRLD 162  
DSSP 1HHHHHHHHHHHLL-----LEEEEEE-eLLEEEEEEELL--LLLLLEEE

DSSP EEEL-LLLL1111e11h1111e11hHHHHhhhhhh1111111111  
Query VSSV-EAGNadqfdtltsdalglvgvpaavavpcxtiPWQIaqlhvtavleepkandr 204  
ident |  
Sbjct IIIVpYSEF-----aCALL-----yft 179  
DSSP EEEL1HHHH-----hHHHH-----hhh

DSSP 1HHHHHHH-----h11hh11hHHHHhhHHHHhhhhhh11  
Query aHDLVDLQ-----lleg11ldADLXptRSACIaifearaq 239  
ident |  
Sbjct gSAHFNRSmralaktkgmslsehalstavrnthgckvpgRVLP--TPTEK-----d 230  
DSSP 1LHHHHHHhhhhhh11e1111e11e1111e11EEL--LLLHH-----h

DSSP 11LLLLL1111hhhhhhhh1111111111hhhhhhhhhhhh1111  
Query hpWPPRVAtlphwpliayagalegldhlelartvdaavqrfvaridratkr 292  
ident |  
Sbjct vfRLLGLP-----yrepardw 247  
DSSP hhHLLLL-----111hhhh11

No 258: Query=mol1A Sbjct=4xq8B Z-score=6.7

[back to top](#)

DSSP -----1111111111hhhhhhhhhhhh1111hHHHHH  
Query -----aapysspntlrslrdrltqvaerqgvfGRLQR 34  
ident |  
Sbjct sesvplvelfsniwagtktaqmwyqgfrsleldirsqaslttqqaiglkhysdfLERMP 60

```

DSSP  HHHHHHHHHHHLL-LLLLLLLLLEEEHHHHHHhh11111LLLLLEEEEL-----
Query  HVAXIVVAQFAATL-TDDTGAPLLLKGGSSLELrrgipdsrTSKDFATVAR----- 85
ident  | | | | |
Sbjct  REEATEIEQTVQKaaQAFNSGLLCVACGSYRRGK-----aTCGDVDVLIThpdgrshr 113
DSSP  HHHHHHHHHHHHHhHLLLEEEELHHHLL-----1EEEEEEEE11111111

DSSP  1LHHHHHHHHHHHh1111eeEEELLEELL11LLLLLEEEEEEE11EEEEEEEE
Query  rDIELIHEQLADAGetgwegftAIFTAPEEIAApgXPVKPRRFTAKLSYrgRAFATVPIE 145
ident  | | | | |
Sbjct  gIFSRLDSLRLQEG-----FLTDDLVSQEE-nGQQQKYLGVCRPLG--PGRHRRLD 162
DSSP  1LHHHHHHHHHLL-----LEEEEEEELLEEELLL--LLLLLEEE

DSSP  EEEL-LLLL1111eeeeelhhhh11111eeeeel1hHHHHhhhhhhh111111111
Query  VSSV-EAGNadqfdtltsdalglvgvpaavpcxtiPWQIaaklhavtavleepkandr 204
ident  |
Sbjct  IIVVpYSEF-----aCALL-----yft 179
DSSP  EEEL1HHHH-----hHHHH-----hhh

DSSP  1HHHHHHH-----hHHhh1hHHHHhhHHHHhhhhhh11
Query  aHDLVDLQ-----1leg11ldADLXptRSACIaifearaq 239
ident  |
Sbjct  gSAHFNRSmralaktkgmslsehalsstavrnthgckvgpgrVLP--TPTEK-----d 230
DSSP  1LHHHHHHhhhhhh11ee1111ee11ee1111ee11EEEL--LLLHH-----h

DSSP  11LLLLL1111hhhhhhhh1111111111hhhhhhhhhhhhhh1111
Query  hpWPPRVAtlphwplyagaleglhdhlelartvdaaavqrfvaridratkr 292
ident  |
Sbjct  vfRLLGLP-----yrepardw 247
DSSP  hhHLLLL-----111hh111

```

No 259: Query=mol1A Sbjct=5chgA Z-score=6.7

[back to top](#)

```

DSSP  -----11111111hhhhhhhhhhhh111hHHHHHH
Query  -----aapyspptnlrsldr1tqvaerqgvvfGRLQRH 35
ident  |
Sbjct  esvpvlelfsniwgagtktaqmwyqgfrslelrsqaslttqqaiglkhysdfLERMPR 60
DSSP  1hhhhhhhh11111hhhhhhhh1111hhhhhh1111hhhhhhhhhhhhHLEEH

DSSP  HHHHHHHHHHLL-LLLLLLLLLEEEHHHHHHhh11111LLLLLEEEEL-----l
Query  VAXIVVAQFAATL-TDDTGAPLLLKGGSSLELrrgipdsrTSKDFATVAR-----r 86
ident  | | | | |
Sbjct  EEATEIEQTVQKaaQAFNSGLLCVACGSYRRGK-----aTCGDVDVAIThpdgrshrg 113
DSSP  HHHHHHHHHHHhHLLLEEEELLLLLLL-----1EEEEEEEE11111111

DSSP  LHHHHHHHHHHHh1111eeEEELL-EELL11LLLLLEEEEEEE11EEEEEEEE
Query  DIELIHEQLADAGetgwegftAIFTAP-EEIAApgXPVKPRRFTAKLSYrgRAFATVPIE 145
ident  | | | | |
Sbjct  IFSRLDSLRLQEG-----FLTDDLvSQEEN--GQQQKYLGVCRPLG--PGRHRRLD 161
DSSP  HHHHHHHHHHLL-----LEEEELLEE--LEEEEEEELLL--LLLLLEEE

DSSP  EEEL-LLLL1111eeeeelhhhh11111eeeeel1hHHHHhhhhhhh111111111
Query  VSSV-EAGNadqfdtltsdalglvgvpaavpcxtiPWQIaaklhavtavleepkandr 204
ident  |
Sbjct  IIVVpYSEF-----aCALL-----yft 178
DSSP  EEEL1HHHH-----hHHHH-----hhh

DSSP  1HHHHHHH-----hHHhh1hHHhhHHHHhhhhhh1111
Query  aHDLVDLQ-----1leg11ldadlxptRSACIaifearaqh 241
ident  |
Sbjct  gSAHFNRSmralaktkgmslsehalsstavrnthgckvgpgrvlpTPTEK-----dvf 231
DSSP  1LHHHHHHhhhhhh11ee1111ee111111111111111111ee11LLLHH-----hhh

DSSP  LLLLLL1111hhhhhhhh1111111111hhhhhhhhhhhhhh1111

```

ident  
 Sbjct RLLGLP-----yrepaerdw 246  
 DSSP HLLLLL-----111hhh111

No 260: Query=mol1A Sbjct=4z6fA Z-score=6.6

[back to top](#)

DSSP -----  
 Query ----- 0  
 ident -----  
 Sbjct tlnggitdmltelanfeknvsqaihkynayrkaasviakyphkiksgaeakklpgvgtki 60  
 DSSP 111hhhhhhhhhhhhhhhh111hhhhhhhhhhhhhh111111hhhhh11111hhh

DSSP -----111111111hh  
 Query -----aapyspntlr 12  
 ident -----  
 Sbjct aekideflatgklrklekirqddtssinfltrvsgigpsaarkfvdegiktledlrkne 120  
 DSSP hhhhhhhhh111hhhhhhhh1hhhhhhhh111111hhhhhhhh111hhhhhh1h

DSSP hhhhhhhhhhh1111hhhhhHHHHHHHHHHHHHH-LLLLLLLLLEEEHHHHHHHHhh11  
 Query slrdrltqvaerqgvfgrlqRHVAXIVVAQFAA-TLDDTGAPLLLKVGSSLELrrgi 71  
 ident | |  
 Sbjct dklnhhqriglkyfgdfekriPREEMLQMQDIVLnEVKKVDSEYIATVCGSFRRGA---- 176  
 DSSP hhl1hhhhhhhh1hhhhh1leEHHHHHHHHHHHHHHHHHHHLLLLEEEELHHHHLLL----

DSSP 111LLLLLEEEEL-----1LHHHHHHHHHHHHhh111leeEEELLEE1111  
 Query pdsRTSKDFATVAR-----rDIELIHEQLADAGetgwegftAIFTAPEEiaap 119  
 ident | | | |  
 Sbjct ---ESSGDMVDVLLThpsftsestkqpkLLHQVVEQLQKVH-----FITDTLSK---- 221  
 DSSP ---LEELLEEEEEE111111111111HHHHHHHHHHHLL-----LEEEEEE----

DSSP 111LLEEEEEEEEL--LEEEEEEEEEEEEL-LLLL111leeeelhhhh1111lee  
 Query gxpVKPRRFTAKLSYR--GRAFATVPIEVSSV-EAGNadqfdtlttsdalglvgvpaavav 176  
 ident | |  
 Sbjct --gETKFMGVCQLPSKndEKEYPHRRIDIRLlpKDQY----- 256  
 DSSP --1LLEEEEEELLLL11LLLLLLEEEEEEEL1HHHH-----

DSSP eel1hHHHH--hhHHHHHHLLL11111111hhhhhhhhhhhh11hHHHHHHHHHHhh  
 Query pcxtiPWQI---aqKLHAVTAVLeepkandrahdldvdlqlegl1ldaDXPtrSACIai 233  
 ident | | | |  
 Sbjct ---yCGVlyftgsDIFAKNMRahaekgftineytirplgvtgvagePLPV--DSEK-- 308  
 DSSP ---hHHHHhhhh11HHHHHHHHHHhhhhleeel11leeel1111111LLL--LLHH--

DSSP hhhh111LLLLL111111hhhhhhhh1111111111hhhhhhhhhhhhhhhh1111  
 Query fearaqhPWPPRvatlphwpliyagaleglhdhlelartvdaaavqrfvaridratkr 292  
 ident -----  
 Sbjct ---difdYIQWK-----yrepkdrse 326  
 DSSP ---hhhhHLLL-----111hhh111

No 261: Query=mol1A Sbjct=1zjnA Z-score=6.6

[back to top](#)

DSSP -----  
 Query ----- 0  
 ident -----  
 Sbjct tlnggitdmltelanfeknvsqaihkynayrkaasviakyphkiksgaeakklpgvgtki 60  
 DSSP 111hhhhhhhhhhhhhhhh111hhhhhhhhhhhhhh111111hhhhh11111hhh

DSSP -----111111111hh  
 Query -----aapyspntlr 12  
 ident -----  
 Sbjct aekideflatgklrklekirqddtssinfltrvsgigpsaarkfvdegiktledlrkne 120  
 DSSP hhhhhhhhh111hhhhhhhh1hhhhhhhh111111hhhhhhhh1111hhhhhh1h

DSSP hhhhhhhhhhh1111hhhhHHHHHHHHHHHHHH-LLLL11LLLLEEEEEHHHHHHhh11  
 Query slrdrltqvaerqgvvfgrlqRHVAXIVVAQFAA-TLTDdtGAPLLLVKGGSSLELrgi 71  
 ident | |  
 Sbjct dklnhhqrigrkyfgdfekriPREEMLMQDIVLnEVKKvdSEYIATVCGSFRRGA---- 176  
 DSSP hhl1hhhhhhhh1hhhhll1eEHHHHHHHHHHHHHHHHL11LLLLEEELHHHHLLL----

DSSP 1111LLLLEEEEEEL-----1LHHHHHHHHHHHHhh1111eeEEELLEE1111  
 Query pdsrTSKDFATVAR-----rDIELIHEQLADAGetgwegftAIFTAPEEiaap 119  
 ident | | | | | | |  
 Sbjct ---eSSGDMDVLLThpsftsestqkpkLLHQVVEQLQKVH-----FITDTLSK---- 221  
 DSSP ---1EELLEEELLLL11111111111HHHHHHHHHHHLL-----LEEEEEE----

DSSP 1111LLLLEEEEEEL--LEEEEEEEL-LLLL1111eeeeh1hhhh11111lee  
 Query gxpVKPRRFTAKLSYR--GRAFATVPIEVSSV-EAGNadqfdtlttsdalglv g v p a a v a v 176  
 ident | | | | |  
 Sbjct --gETKFMGVCQLPSKndEKEYPHRRIDIRLIpKDQY----- 256  
 DSSP --1LEEEEEEELLLL111111111111HHHH-----

DSSP eellhHHHHHHhhhhhh1111111111HHHH-----hhhhhhhh  
 Query pcxtiPWQIAQklhavtavleepkandraHDLV-----dlqllegl 217  
 ident |  
 Sbjct ----YCGVLY-----ftgSDIFnkmmrahaalekgftineytirplgtg 296  
 DSSP ----HHHHH-----hhlLHHHHhhhhhhhhhhleeel11111111

DSSP 11hHHHHHhHHHHhhhhhh11111111111hhhhhhhh1111111111hhhhhh  
 Query lldADLXPtrSACIaifearaqhWPPRvatlphwplyagalegl dhlelartvdaaaq 277  
 ident |  
 Sbjct vagEPLPV--DSEK----difdYIQWK----- 317  
 DSSP 11111111--LLHH----hhhhHLLL-----

DSSP hhhhhhhhhhh1111  
 Query avqrfvaridratkr 292  
 ident |  
 Sbjct -----yrepkdrs 325  
 DSSP -----111hhhh11

No 262: Query=mol1A Sbjct=4rpzA Z-score=6.6

[back to top](#)

DSSP -----  
 Query ----- 0  
 ident -----  
 Sbjct tlnggitedmtelanfeknvsqaihknayrkaasviakyphkiksgaeakklpgvgtki 60  
 DSSP 11111111111111111111111111111111111111111111111111111111111111

DSSP -----1111111111hh  
 Query -----aapyspptnlr 12  
 ident -----  
 Sbjct aekideflatgklrklekirqddtssinfltrvsgigpsaarkfvdegiktledlrkne 120  
 DSSP hhhhhhhhh111hhhhhhhh1hhhhhhhh111111111111111111111111111111111111

DSSP hhhhhhhhhhh1111hhhhHHHHHHHHHHHHHH-LLLL11LLLLEEEEEHHHHHHhh11  
 Query slrdrltqvaerqgvvfgrlqRHVAXIVVAQFAA-TLTDdtGAPLLLVKGGSSLELrgi 71  
 ident | |  
 Sbjct dklnhhqrigrkyfgdfekriPREEMLMQDIVLnEVKKvdSEYIATVCGSFRRGA---- 176  
 DSSP hhl1hhhhhhhh1hhhhll1eEHHHHHHHHHHHHHHHHHHL11LLLLEEELHHHHLLL----

DSSP 1111LLLLEEEEEEL-----1LHHHHHHHHHHHHhh1111eeEEELLEE1111  
 Query pdsrTSKDFATVAR-----rDIELIHEQLADAGetgwegftAIFTAPEEiaap 119  
 ident | | | | | | |  
 Sbjct ---eSSGDMDVLLThpsftsestqkpkLLHQVVEQLQKVH-----FITDTLSK---- 221  
 DSSP ---1EELLEEELLLL11111111111HHHHHHHHHHHLL-----LEEEEEE----

DSSP 1111LLLLEEEEEEL--1EEEEEEL-LLLL1111eeeeh1hhhh11111lee  
 Query gxpVKPRRFTAKLSYR--GRAFATVPIEVSSV-EAGNadqfdtlttsdalglv g v p a a v a v 176  
 ident | | | | |

DSSP --1LLEEEEEELLLLL111LLLLLEEEEEEL1HHHH-----  
DSSP eellHHHHHHHHHH1111111111HHHH-----hhhhhhh  
Query pcxtiPWQIaqlhavtavleepkandraHDLV-----dlqllegl 217  
ident |  
Sbjct ---yCGVL-----yftgSDIFnknmrahalekgftineytirplgvtg 296  
DSSP ---hHHHH-----hhh1LHHHHHHHHHHHlleell11lee1111

DSSP 1lhHHHHHHHHHHHHHHHH111LLLLL1111hhhhhhhh1111111111hhhhhh  
Query 1ldADLXPtRSACIaifearaqhPWPPRVatlpwpliyagalegldhlelartvdaaaq 277  
ident |  
Sbjct vagEPLPV--DSEK----difdYIQWKY----- 318  
DSSP 111LLLL--LLHH----hhhHLLLL-----

DSSP hhhhhhhhh1111  
Query avqrfvaridratkr 292  
ident |  
Sbjct -----repkdrse 326  
DSSP -----11hhhh11

No 263: Query=mol1A Sbjct=31k9A Z-score=6.6

[back to top](#)

DSSP -----  
Query ----- 0  
ident |  
Sbjct tlnggitdmltelanfekvnqsqaihkynayrkaasviakyphkiksgaeakklpgvgtki 60  
DSSP 111hhhhhhhhhhhhhh111hhhhhhhhhhhhhh1111111hhhh111111hh

DSSP -----11111111hh  
Query -----aapyspntlr 12  
ident |  
Sbjct aekideflatgklrklekirqddtssinfltrvsgigpsaarkfvdegiktledlrkne 120  
DSSP hhhhhhhhh111hhhhhhhh1hhhhhhhh11111hhhhhhhh1111hhhhhhhh

DSSP hhhhhhhhh1111hhhhHHHHHHHHHHH-LLLL11LLLLEEEEHHHHHHhh11  
Query slrdrltqvaerqgvfgrlqRHXIVVAQFAA-TLTDdtGAPLLLVKGGSSLELrrgi 71  
ident | |  
Sbjct dklnhhqriglkyfgdfekriPREEMLMQDIVLnEVKKvdSEYIATVCGSFRRGA---- 176  
DSSP hhl1hhhhhh111hh11eEHHHHHHHHHHHHHLL111LLEEEELHHHHLL----

DSSP 1111LLEEEEEEL-----1LHHHHHHHHHHHHhh1111eeEELLEEL111  
Query pdsrTSKDFATVAR-----rDIELIHEQLADAGetgwegftaIFTAPEEJaap 119  
ident | | | |  
Sbjct ---eSSGDMVLLThpsftsestqpkLLHQVVEQLQKVH-----FITDTLSK--- 221  
DSSP ---1EELLEEEEE11lee11ee1111HHHHHHHHHHLL-----LEEEEE---

DSSP 111LLEEEEEEEEL--LEEEEEEEEEEL-LLLL1111eeee1hhhh1111lee  
Query gxpVKPRRFTAKLSYR--GRAFATVPIEVSSV-EAGNadqfdtlttsdalglvgpaavav 176  
ident | |  
Sbjct --gETKFMGVCQLPSKndEKEYPHRRIDIRLIpKDQY----- 256  
DSSP --1LLEEEEEELLLLL11LLLLLEEEEEEL1LLH-----

DSSP eellHHHHHHHHHH1111111111HHHHHH-----hhhhh  
Query pcxtiPWQIaqlhavtavleepkandraHDLVDLQ-----llegl 217  
ident |  
Sbjct ---yCGVL-----yftgSDIFNKNmrahalekgftineytirplgvtg 296  
DSSP ---hHHHH-----hhh1LHHHHHHHHHHHHHlleell11lee1111

DSSP 1lhHHHHHHHHHHHHHHHH111LLLLL1111hhhhhhhh1111111111hhhhhh  
Query 1ldADLXptRSACIaifearaqhPWPPRVatlpwpliyagalegldhlelartvdaaaq 277  
ident |  
Sbjct vagEPLPV--VDSEK----difDYIQW----- 316  
DSSP 111LLLL--LLLHH----hhhHLLLL-----



Query avqrfvaridratkr 292  
ident  
Sbjct -----kyrepkdrse 326  
DSSP -----1111hhh111

No 264: Query=mol1A Sbjct=9icrA Z-score=6.6

[back to top](#)

DSSP -----  
Query ----- 0  
ident  
Sbjct etlnggitdmltelanfeknvsqaihkynayrkaasviakyphkiksgaeakklpgvgtk 60  
DSSP 1111hhhhhhhhhhhhhhhh1111hhhhhhhhhhhhhhhh111111hhhhh11111hh

DSSP -----111111111h  
Query -----aapyspsptnl 11  
ident  
Sbjct iaekideflatgklrklekirqddtssinfltrvsgigpsaarkfvdegiktledlrkn 120  
DSSP hhhhhhhhh1111hhhhhh111hhhhhhhhhh111111hhhhhhhhhh1111hhhhhh1

DSSP hhhhhhhhhhh1111hhhhHHHHHHHHHHHHH-LLLL11LLLLEEEHHHHHHhh1  
Query rslrdrltqvaerqgvfgrlqRHVAXIVVAQFAA-TLTDdtGAPLLLKGGSSLELrrg 70  
ident | |  
Sbjct edklnhhqriglkyfgdfekriPREEMLMQDIVLnEVKKvdSEYIATVCGSFRGA--- 177  
DSSP 11111hhhhhhhh11hhhh1eHHHHHHHHHHHHHHHHH1LLLLEEEELLLLLL---

DSSP 1111LLLLEEEEL-----1LHHHHHHHHHHHHhh1111eeEEELLLEEL11  
Query ipdsrTSKDFATVAR-----rDIELIHEQLADAGetgwegftAIFTAPEEIIaa 118  
ident | | | | |  
Sbjct ---eSSGDMDVLLThpsftsestkpqkLLHQVVEQLQKVH-----FITDTLSKG-- 223  
DSSP ---1EELLEEEEEE11111111111hHHHHHHHHHHLL-----LEEEEEEEL--

DSSP 1111LLLLEEEEEEEL--EEEEEEEEEEEL-LLLL1111eeeee1hhhh11111ee  
Query pgxpVKPRRFTAKLSYRG--RAFATVPIEVSSV-EAGNadqfdtltsdalglvgvpaava 175  
ident | |  
Sbjct ---ETKFMGVCQLPSKNdeKEYPHRRIDIRLIpKDQY----- 257  
DSSP ---LLEEEEEEELLLLL11LLLLEEEEEEEL1HHHH-----

DSSP eeellhHHHHhhhhhhhh11111111111hhhhHHHHHH-----  
Query vpcxtiPWQIaqlhavlavlepkandrahdLvDLQLE----- 215  
ident  
Sbjct -----yCGVL-----yftgSDIFNKnrahalekgftineytirp 292  
DSSP -----hHHHH-----hh11LHHHHhhhhhhhh11eeel11lee

DSSP -hh11hhhhhhHHHHHHhhhh1111LLL11111hhhhhhhh1111111111hh  
Query -gl1ldadlxptRSACIAifearaqhpWPPRVatlphwpliyagaleglhdhlelartvda 274  
ident  
Sbjct lgvtgvageplpVDSEKD-----ifdYIQWK----- 318  
DSSP 111111111111LLLHHH-----hhhHLLL-----

DSSP hhhhhhhhhhh1111  
Query aaqavqrfvaridratkr 292  
ident  
Sbjct -----yrepkdrse 327  
DSSP -----1111hhh11

No 265: Query=mol1A Sbjct=9icqA Z-score=6.6

[back to top](#)

DSSP -----  
Query ----- 0  
ident  
Sbjct etlnggitdmltelanfeknvsqaihkynayrkaasviakyphkiksgaeakklpgvgtk 60  
DSSP 1111hhhhhhhhhhhhhhhh1111hhhhhhhhhhhhhhhh111111hhhhh11111hh

```

DSSP -----111111111h
Query -----aapyspntnl 11
ident
Sbjct iaekideflatgklrklekirqddtssinfltrvsgigpsaarkfvdegiktledlrkn 120
DSSP hhhhhhhhhhh111hhhhhh11hhhhhhhh111111hhhhhhhh111111hhhhhhhh1

DSSP hhhhhhhhhhh111hhhhHHHHHHHHHHHHH-LLLL11LLLEEEHHHHHHhh1
Query rslrdrltqvaerqgvfgrlqRHVAXIVVAQFAA-TLTDdtGAPLLLVKGGSSLELrrg 70
ident | |
Sbjct edklnhhqriglkyfgdfekriPREEMLQMQDIVLnEVKKvdSEYIATVCGSFRRGA--- 177
DSSP 1111hhhhhhhh1hhhh1leEHHHHHHHHHHHHHHHHHH1LLLEEEELHHHHLL---

DSSP 1111LLLEEEEL-----1LHHHHHHHHHHHHhh111leEEELLEEL11
Query ipdsrTSKDFATVAR-----rDIELIHEQLADAGetgwegftAIFTAPEEIaa 118
ident | | || |
Sbjct ---eSSGDMVLLThpsftsestqpkLLHQVVEQLQKVH-----FITDTLSKG-- 223
DSSP ---LEELLEEEEEEe1111111111hhHHHHHHHHHLL-----LEEEEEEEL--

DSSP 1111LLLEEEEEEEL--EEEEEEEEEEEL-LLLL111leeee1hhhh11111ee
Query pgxpVKPRRFTAKLSYRG--RAFATVPIEVSSV-EAGNadqfdtltsdalglvgvpaava 175
ident | |
Sbjct ---ETKFMGVCQLPSKNdeKEYPHRRIDIRLIpKDQY----- 257
DSSP ---LEEEEEEELLLL11LLLEEEEEEeHHHH-----

DSSP ee11hHHHHhhhhhh1111111111hhhhHHHHH-----
Query vpcxtiPWQIaqlhavgtaaveepkandrahdlvDLQLE----- 215
ident
Sbjct ----yCGVL-----yftgSDIFNKmrahalekgftineytirp 292
DSSP ----hHHHH-----hh11LHHHHhhhhhhhh1leee1leeee

DSSP -hh1hhhhhhHHHHHHhhhh1111LLLL1111hhhhhhhh1111111111hh
Query -gl1ldadlxtRSACIAifearaqhpWPPRVatlphwpliyagaleglhdlelartvda 274
ident
Sbjct lgvtgvageplpVDESEK-----ifdYIQWK----- 318
DSSP 1111111111LLHHH-----hhHLLL-----

DSSP hhhhhhhhhhh1111
Query aaqavqrfvaridratkr 292
ident
Sbjct -----yrepkdrse 327
DSSP -----111hhhh11

```

No 266: Query=mol1A Sbjct=1huzB Z-score=6.6

[back to top](#)

```

DSSP -----
Query ----- 0
ident
Sbjct tlnggitdmlvelanfeknvsqaihkynayrkaasviakyphkiksgaeakk1pgvgtki 60
DSSP 111hhhhhhhhhhhhhh111hhhhhhhhhhhhhh111111hhhh111111hh

DSSP -----111111111hh
Query -----aapyspntnlr 12
ident
Sbjct aekideflatgklrklekirqddtssinfltrvtgigpsaarklvdegiktledlrkne 120
DSSP hhhhhhhhh111hhhhhh11hhhhhhhh111111hhhhhh111111hhhh11h

DSSP hhhhhhhhhhh111hhhhHHHHHHHHHHHHH-LLLLLLLLEEEHHHHHHhh11
Query slrdrltqvaerqgvfgrlqRHVAXIVVAQFAA-TLTDGTGAPLLLVKGGSSLELrri 71
ident | |
Sbjct dklnhhqriglkyfedfekriPREEMLQMQDIVLnEVKKLDPEYIATVCGSFRRGA--- 176
DSSP hh11hhhhhhhh1hhhh111LHHHHHHHHHHHHHHHHHH1LLLEEEELHHHHLL---

DSSP 1111LLLEEEEL-----1LHHHHHHHHHHHHhh111leEEELLEEL111
Query pdsrTSKDFATVAR-----rDIELIHEQLADAGetgwegftAIFTAPEEiaap 119

```



DSSP -hhllhhhhhhHHHHHHhhhh1111LLLLL1111hhhhhhhh11111111hhhh  
Query -gl1ldadlxptRSACIaifearaqhpWPPRVatlphwplyagaleglhdhlelartvda 274  
ident  
Sbjct lgvtagvageplpVDSEK-----difDYIQW----- 317  
DSSP 111111111111LHLLH-----hhhHLLL-----

DSSP hhhhhhhhhhhhh1111  
Query aaqavqrfvaridratkr 292  
ident  
Sbjct -----kyrepkdrse 327  
DSSP -----1111hh111

No 268: Query=mollA Sbjct=9iciA Z-score=6.6

[back to top](#)

DSSP -----  
Query ----- 0  
ident  
Sbjct etlnggitdmltelanfeknvsqaihkynayrkaasviakyphkiksgaeakklpgvgtk 60  
DSSP 1111hhhhhhhhhhhh1111hhhhhhhhhhhh111111hhhh111111hh

DSSP -----1111111111h  
Query -----aapyspsptnl 11  
ident  
Sbjct iaekideflatgklrklekirqddtsssinfltrvsgigpsaarkfvdegiktleldrkn 120  
DSSP hhhhhhhhhhh1111hhhhhhhhhhhhhh111111hhhhhhhhhh1111hhhhhh1

DSSP hhhhhhhhhhh1111hhhhhhHHHHHHHHHHH-LLLL11LLLEEEEEHHHHHHhh1  
Query rslrdrltqvaerqgvfgrlqRHXVAXIVVAQFAA-TLTDdtGAPLLLVKGGSSLELrrg 70  
ident  
Sbjct edklnhhqriglkyfgdfekriPREEMLQMQDIVLnEVKKvdSEYIATVCGSFRRGA--- 177  
DSSP hhh11hhhhhhhh1111111eEHHHHHHHHHHHHHHHHH1LLLEEEELHHHHLL---

DSSP 11111LLLEEEEEEL-----1LHHHHHHHHHHHHhh1111eEELLELEEL11  
Query ipdsrTSKDFATVAR-----rDIELIHEQLADAGetgwegftAIFTAPEEIaa 118  
ident  
Sbjct ---eSSGDMDVLLThpsftsestqpkLLHQVVEQLQKVH-----FITDTLSKG-- 223  
DSSP ---1EELLEEEEEEL1111111111hHHHHHHHHHHHHL-----LEEEEEEL--

DSSP 1111LLLEEEEEEEELL--EEEEEEEEEEEL-LLLL1111eEEEElhhhh11111lee  
Query pgxpVKPRRFTAKLSYRG--RAFATVPIEVSSV-EAGNadqfdtltsdalglvgvpaava 175  
ident  
Sbjct ---ETKFMGVCQLPSKNdeKEYPHRRIDIRLIpKDQY----- 257  
DSSP ---LLEEEEEELLLL1111LLLEEEEEEEeHHHH-----

DSSP eeellhHHHHhhhhhh1111111111hhhhHHHHHH-----  
Query vpcxtiPWQIaqklhavtavlepkandrahdLvDLQLE----- 215  
ident  
Sbjct ----yCGVL-----yftgSDIFNKmrahalekgftineytirp 292  
DSSP ----hHHHH-----hh1LHHHHhhhhhhhh1leeel111lee

DSSP --hhllhhhhhhHHHHHHhhhh1111LLLLL1111hhhhhhhh11111111hh  
Query --gl1ldadlxptrSACIaifearaqhpWPPRVatlphwplyagaleglhdhlelartvd 273  
ident  
Sbjct lgvtagvageplpvdSEKD-----ifdYIQWK----- 318  
DSSP 111111111111LHLLH-----hhhHLLL-----

DSSP hhhhhhhhhhhhh1111  
Query aaaqavqrfvaridratkr 292  
ident  
Sbjct -----yrepkdrse 327  
DSSP -----111hh111

No 269: Query=mollA Sbjct=8icyA Z-score=6.6

```

DSSP -----
Query ----- 0
ident
Sbjct etlnggitdmltelanfeknvsqaihkynayrkaasviakyphkiksgaeakklpgvgtk 60
DSSP 1111hhhhhhhhhhhhhhhh1111hhhhhhhhhhhhhhhh111111hhhhhh11111hh

DSSP -----111111111h
Query -----aapyspntnl 11
ident
Sbjct iaekideflatgklrklekirqddtssinflttrvsgigpsaarkfvdegiktledlrkn 120
DSSP hhhhhhhhh1111hhhhhhhhhhhhhhhh111111hhhhhhhhhh11111hhhhhh1

DSSP hhhhhhhhhhh1111hhhhHHHHHHHHHHHH-LLLL11LLLEEEHHHHHHhh1
Query rslrdrltqvaerqgvfgrlqRHVAXIVVAQFAA-TLTDdtGAPLLLKGGSSLELrrg 70
ident
Sbjct edklnhhqriglkyfgdfekriPREEMLQMDIVLnEVKKvdSEYIATVCGSFRRGA--- 177
DSSP hhh11hhhhhhhh111hhhl1eHHHHHHHHHHHHHHHHHh1LLEEEELLLLLL---

DSSP 11111LLLEEEEL-----1LHHHHHHHHHHHHhh1111eeEELLEEL11
Query ipdsrTSKDFATVAR-----rDIELIHEQLADAGetgwegftAIFTAPEEIaa 118
ident
Sbjct ---eSSGDMVLLThpsftsestkpklLHQVVEQLQKVH-----FITDTLSKG-- 223
DSSP ---1EELLEEEEEEe1111111111hHHHHHHHHHHLL-----LEEEEEEEL--

DSSP 1111LLLEEEEEEEL--EEEEEEEEEEEL-LLLL1111eeee1hhhh1111lee
Query pgxpVKPRRFTAKLSYRG--RAFATVPIEVSSV-EAGNadqfdtltsdalglvgpaava 175
ident
Sbjct ---ETKFMGVCQLPSKNdeKEYPHRRIDIRLIpKDQY----- 257
DSSP ---LLEEEEEEELLLL11LLLEEEEEEeHHHH-----

DSSP eeellhHHHHhhhhhh1111111111hhhhHHHHHH-----
Query vpcxtiPWQIaqlhvtavlepkandrahdlyDLQLE----- 215
ident
Sbjct ---yCGVL-----yftgSDIFNKmrahalekgftineytirp 292
DSSP ---hHHHH-----hh11LHHHHhhhhhh1111eeelllee

DSSP -hh11hhhhhhHHHHHHhhhh1111LLLL11111hhhhhhhh111111111hh
Query -gl1ldadlxptRSACIAifearaqhpWPPRVat1phwpliyagalegldhlelartvda 274
ident
Sbjct lgvgtvageplpVDSEKD-----ifdYIQWK----- 318
DSSP 11111111111LLHHH-----hhhL-----

DSSP hhhhhhhhhhh1111
Query aaqavqrfvaridratkr 292
ident
Sbjct -----yrepkdrse 327
DSSP -----11111111

```

No 270: Query=mol1A Sbjct=9icjA Z-score=6.6

[back to top](#)

```

DSSP -----
Query ----- 0
ident
Sbjct etlnggitdmltelanfeknvsqaihkynayrkaasviakyphkiksgaeakklpgvgtk 60
DSSP 1111hhhhhhhhhhhhhhhh1111hhhhhhhhhhhhhhhh111111hhhhhh11111hh

DSSP -----111111111h
Query -----aapyspntnl 11
ident
Sbjct iaekideflatgklrklekirqddtssinflttrvsgigpsaarkfvdegiktledlrkn 120
DSSP hhhhhhhhh1111hhhhhhhhhhhhhhhh111111hhhhhhhhhh11111hhhhhh1

DSSP hhhhhhhhhhh1111hhhhHHHHHHHHHHHH-LLLL11LLLEEEHHHHHHhh1
Query rslrdrltqvaerqgvfgrlqRHVAXIVVAQFAA-TLTDdtGAPLLLKGGSSLELrrg 70

```

Sbjct edklnhhqriglkyfgdfekriPREEMLQMQUIVnEVKKvdSEYIATVCGSFRGA--- 177  
DSSP hhh11hhhhhhhh11hhhh11eEHHHHHHHHHHHHHHHHHh1LLEEEEEELLLLLL---

DSSP 11111LLEEEEEEL-----1LHHHHHHHHHHHHhh1111eeEEELLEEL11  
Query ipdsrTSKDFATVAR-----rDIELIHEQLADAGetgwegftAIFTAPEEIaa 118  
ident | | || |  
Sbjct ---eSSGDMDVLLThpsftsestqpkLLHQVVEQLQKVH-----FITDTLSKG-- 223  
DSSP ---1EELLEEEEEEL1111111111hHHHHHHHHHHHLL-----LEEEEEEL--

DSSP 1111LLEEEEEEEEEELL--EEEEEEEEEEEL-LLLL1111eeeee1hhhh111111ee  
Query pgxpVKPRRFTAKLSYRG--RAFATVPIEVSSV-EAGNadqfdtlttsdalglvgvpaava 175  
ident | |  
Sbjct ---ETKFMGVCQLPSKNdeKEYPHRRIDIRLIpKDQY----- 257  
DSSP ---LLEEEEEELLLLL11LLEEEEEEEEEeHHHH-----

DSSP eeellHHHHhhhhhhhh1111111111111111hhhhHHHHHH-----  
Query vpcxtiPQIaqlhavlavleekandrahdlvDLQLE----- 215  
ident  
Sbjct ----yCGVL-----yftgSDIFNKmrahalekgftineytirp 292  
DSSP ----hHHHH-----hh11LHHHHhhhhhhhh11eeelleeee

DSSP -hh11hhhhhhhhHHHHHHhhhh1111LLELL11111hhhhhhhh1111111111hh  
Query -gl1ldadlxptRSACIAifearaqhpWPPRVatlphwpliyagalegldhelartvda 274  
ident  
Sbjct lgvtgvageplpVDSEKD-----ifdYIQWK----- 318  
DSSP 111111111111LLEHHH-----hhHLLLL-----

DSSP hhhhhhhhhhhhh1111  
Query aaqavqrfvaridratkr 292  
ident  
Sbjct -----yrepkdrse 327  
DSSP -----111hhhh111

No 271: Query=mol1A Sbjct=8icmA Z-score=6.6

[back to top](#)

DSSP -----  
Query ----- 0  
ident  
Sbjct etlnggitdmltelanfeknvsqaihkyayrkaasviakyphkiksgaeakklpgvgtk 60  
DSSP 1111hhhhhhhhhhhhhh1111hhhhhhhhhhhh1111111111hhhh11111hh

DSSP -----1111111111h  
Query -----aapyspsptnl 11  
ident  
Sbjct iaekideflatgklrklekirqddtsssinf1trvsgigpsaarkfvddegiktledlrkn 120  
DSSP hhhhhhhhh1111hhhhhhhhhhhhhh111111hhhhhhhh1111hhhh11

DSSP hhhhhhhhhhh1111hhhhHHHHHHHHHHHH-LLLL11LLEEEEEHHHHHHhh1  
Query rslrdrltqvaerqgvfgrlqRHVAXIVVAQFAA-TLTDdtGAPLLLVKGGSSLELrrg 70  
ident | |  
Sbjct edklnhhqriglkyfgdfekriPREEMLQMQUIVnEVKKvdSEYIATVCGSFRGA--- 177  
DSSP hhh11hhhhhhhh11hhhh11eEHHHHHHHHHHHHHHHh1LLEEEEEELLLLLL---

DSSP 11111LLEEEEEEL-----1LHHHHHHHHHHHHhh1111eeEEELLEEL11  
Query ipdsrTSKDFATVAR-----rDIELIHEQLADAGetgwegftAIFTAPEEIaa 118  
ident | | || |  
Sbjct ---eSSGDMDVLLThpsftsestqpkLLHQVVEQLQKVH-----FITDTLSKG-- 223  
DSSP ---1EELLEEEEEEL1111111111hHHHHHHHHHHHLL-----LEEEEEEL--

DSSP 1111LLEEEEEEEEEELL--EEEEEEEEEEEL-LLLL1111eeeee1hhhh111111ee  
Query pgxpVKPRRFTAKLSYRG--RAFATVPIEVSSV-EAGNadqfdtlttsdalglvgvpaava 175  
ident | |  
Sbjct ---ETKFMGVCQLPSKNdeKEYPHRRIDIRLIpKDQY----- 257  
DSSP ---LLEEEEEELLLLL11LLEEEEEEEEEeHHHH-----

DSSP eeellhHHHHhhhhhhhh1111111111hhhhHHHHHH-----  
Query vpcxtiPWQIaqlhavlavleekandrahdLvDLQLE----- 215  
ident  
Sbjct ----yCGVL-----yftgSDIFNKnmrahalekgftineytirp 292  
DSSP ----hHHHH-----hhh1LHHHHhhhhhhhh1111111111

DSSP --hhllhhhhhhhhHHHHhhhhhh1111LLLLL1111hhhhhhhhhh1111111111hh  
Query --gllldadlxptrSACIaifearaqhpWPPRVatlpwplyagalegldhlelartvd 273  
ident |  
Sbjct lgvTgvageplpvdSEKD-----ifdYIQWK----- 318  
DSSP 111111111111LHHH-----hhhHLLL-----

DSSP hhhhhhhhhhhhh1111  
Query aaaqavqrfvaridratkr 292  
ident  
Sbjct -----yrepkdrse 327  
DSSP -----111hh111

No 272: Query=mol1A Sbjct=7ictA Z-score=6.6

[back to top](#)

DSSP -----  
Query ----- 0  
ident  
Sbjct etlnggitdmltelanfeknvsqaihkynayrkaasviakypkiksgaeakklpgvgtk 60  
DSSP 1111hhhhhhhhhhhhhh1111hhhhhhhhhhhhhh111111hhhh111111hh

DSSP -----1111111111h  
Query -----aapyspntl 11  
ident  
Sbjct iaekideflatgklrklekirqddtssinflttrvsgigpsaarkfvdegiktledlrkn 120  
DSSP hhhhhhhhh1111hhhhhhhhhhhhhh111111hhhhhhhhhh1111hhhhhh1

DSSP hhhhhhhhhhh1111hhhhhhHHHHHHHHHHHH-LLLL11LLLEEEHHHHHHhh1  
Query rslrdrltqvaerqgvfgrlqRHVAXIVVAQFAA-TLTDdtGAPLLLKGGSSLELrrg 70  
ident | |  
Sbjct edklnhhqriglkyfgdfekriPREEMLQMqDIVLnEVKKvdSEYIATVCGSFRRGA--- 177  
DSSP hhh11hhhhhhhh11hhhh11eEHHHHHHHHHHHHHHHHH1LLEEEELLLLLL---

DSSP 1111LLLEEEEL-----1LHHHHHHHHHHhh1111eeEEELLEEL11  
Query ipdsrTSKDFATVAR-----rDIELIHEQLADAGetgwegftAIFTAPEEIaa 118  
ident | | | |  
Sbjct ---eSSGDMDVLLThpsftsestqpkLLHQVVEQLQKVH-----FITDTLSKG-- 223  
DSSP ---1EELLEEEEEEe1111111111hhHHHHHHHHHLL-----LEEEEEEEL--

DSSP 1111LLLEEEEEEEL--EEEEEEEEEEEL-LLLL1111eeee1hhhh111111ee  
Query pgxpVKPRRFTAKLSYRG--RAFATVPIEVSSV-EAGNadqfdlttsdalglvgpaava 175  
ident | |  
Sbjct ---ETKFMGVCQLPSKNdeKEYPHRRIDIRLIpKDQY----- 257  
DSSP ---LLEEEEEEELLLLL11LLLEEEEEEeHHHH-----

DSSP eeellhHHHHhhhhhhhh1111111111hhhhHHHHHH-----  
Query vpcxtiPWQIaqlhavlavleekandrahdLvDLQLE----- 215  
ident  
Sbjct ----yCGVL-----yftgSDIFNKnmrahalekgftineytirp 292  
DSSP ----hHHHH-----hh11LHHHHhhhhhhhh1leeell11ee

DSSP --hhllhhhhhhhhHHHHhhhhhh1111LLLLL1111hhhhhhhhhh1111111111hh  
Query --gllldadlxptrSACIaifearaqhpWPPRVatlpwplyagalegldhlelartvd 273  
ident |  
Sbjct lgvTgvageplpvdSEKD-----ifdYIQWK----- 318  
DSSP 111111111111LHHH-----hhhHLLL-----

DSSP hhhhhhhhhhhhh1111  
Query aaaqavqrfvaridratkr 292  
ident

DSSP -----111hhhh11

No 273: Query=mol1A Sbjct=7icuA Z-score=6.6

[back to top](#)

```

DSSP -----
Query ----- 0
ident
Sbjct etlnggitdmltelanfeknvsqaihkynayrkaasviakyphkiksgaeakklpgvgtk 60
DSSP 1111hhhhhhhhhhhhhhhh1111hhhhhhhhhhhhhhhh111111hhhh11111hh

```

```

DSSP -----111111111h
Query -----aapyspsptnl 11
ident
Sbjct iaekideflatgklrklekirqddtssinflttrvsgigpsaarkfvdegiktleldrkn 120
DSSP hhhhhhhhh1111hhhhhh111hhhhhhhhhh11111hhhhhhhhhh1111hhhhhh1

```

```

DSSP hhhhhhhhhhh1111hhhhhhHHHHHHHHHHHH-LLLL11LLLLEEEHHHHHHHHh1
Query rslrdrltqvaerqgvfgrlqRHVAXIVVAQFAA-TLTDdtGAPLLLKGGSSLELrrg 70
ident
Sbjct edklnhhqriglkyfgdfekriPREEMLMQDIVLnEVKKvdSEYIATVCGSFRGA--- 177
DSSP hhh11hhhhhhhh1hhhh11eHHHHHHHHHHHHHHHHh1LLEEEELLLLLLLL---

```

```

DSSP 11111LLLLEEEEL-----1LHHHHHHHHHHHHhh1111eeEEELLEEL11
Query ipdsrTSKDFATVAR-----rDIELIHEQLADAGetgwegftAIFTAPEEIIaa 118
ident
Sbjct ---eSSGDMDVLLThpsftsestkqpkLLHQVVEQLQKVH-----FITDTLSKG-- 223
DSSP ---1EELLEEEEEEe1111111111hHHHHHHHHHHLL-----LEEEEEEEL--

```

```

DSSP 1111LLLLEEEEEEELL--EEEEEEEEEEEL-LLLL1111eeeeelhhhh1111lee
Query pgxpVKPRRFTAKLSYRG--RAFATVPIEVSSV-EAGNadqfdtltsdalglvgpaava 175
ident
Sbjct ---ETKFMGVCQLPSKNdeKEYPHRRIDIRLIpKDQY----- 257
DSSP ---LLEEEEEEELLLLL1111LLLLEEEEEEeHHHH-----

```

```

DSSP ee11hHHHHHHhhhhhh11111111111hhhhHHHHHH-----
Query vpcxtiPWQIAQklhavtavlepkandrahdldvDLQLE----- 215
ident
Sbjct -----yCGVLYF-----tgSDIFNKnmrahaalekgftineytirp 292
DSSP -----hHHHHHL-----1LHHHHHHhhhhhhhh1lee111lee

```

```

DSSP --hh11hhhhhhhhHHHHhhhhhh1111LLL11111hhhhhhhh111111111hh
Query --gllldadlxptrSACIaifearaqhpWPPRVatlpwpliayagalegldhlelartvd 273
ident
Sbjct lgvtgvageplpvdSEKD-----ifdYIQWK----- 318
DSSP 1111111111111LHHH-----hhHLLL-----

```

```

DSSP hhhhhhhhhhhhh1111
Query aaaqavqrvaridratkr 292
ident
Sbjct -----yrepkdrse 327
DSSP -----111hh111

```

No 274: Query=mol1A Sbjct=8ichA Z-score=6.6

[back to top](#)

```

DSSP -----
Query ----- 0
ident
Sbjct etlnggitdmltelanfeknvsqaihkynayrkaasviakyphkiksgaeakklpgvgtk 60
DSSP 1111hhhhhhhhhhhhhhhh1111hhhhhhhhhhhhhhhh111111hhhh11111hh

```

DSSP -----111111111h



```

ident
Sbjct iaekideflatgklrklekirqddtssinfltrvsgigpsaarkfvdegiktledlrkn 120
DSSP hhhhhhhhhhh1111hhhhhhhhhhhhhhhhhhhh111111hhhhhhhhhh1111hhhhhhhh

DSSP hhhhhhhhhhh1111hhhhhhHHHHHHHHHHHHHH-LLLL11LLLLEEEHHHHHHHHhh1
Query rslrdrldtqvaerqgvfgrlqRHVAXIVVAQFAA-TLTDdtGAPLLLKVGSSLELrrg 70
ident | |
Sbjct edklnhhqriglkyfgdfekriPREEMLQMQDIVLnEVKKvdSEYIATVCGSFRGA--- 177
DSSP hhh11hhhhhhhh11hhhh1leEHHHHHHHHHHHHHHHHHH1LLEEEELLLLLLLL---

DSSP 1111LLLLEEEEL-----1LHHHHHHHHHHHHhh1111eeEEELLLEEL11
Query ipdsrTSKDFATVAR-----rDIELIHEQLADAGetgwegftAIFTAPEEIaa 118
ident | | | |
Sbjct ---eSSGDMDVLLThpsftsestqpkLLHQVVEQLQKVH-----FITDTLSKG-- 223
DSSP ---LEELLEEEEEEe1111111111hHHHHHHHHHHHLL-----LEEEEEEEL--

DSSP 1111LLLLEEEEEEEL--EEEEEEEEEEEL-LLLL1111eeeee1hhhh11111ee
Query pgxpVKPRRFTAKLSYRG--RAFATVPIEVSSV-EAGNadqfdtltsdalglvgvpaava 175
ident | |
Sbjct ---ETKFMGVCQLPSKNdeKEYPHRRIDIRLIpKDQY----- 257
DSSP ---LEEEEEEELLLLL11LLLLEEEEEEeHHHH-----

DSSP eeellhHHHHhhhhhhhh11111111111hhhhHHHHHH-----
Query vpcxtiPWQIaqlhavlavlepkandrahdlvDLQLE----- 215
ident
Sbjct ---yCGVL-----yftgSDIFNKmrahalekgftineytirp 292
DSSP ---hHHHH-----hhh1LHHHHHHhhhhhh1111ee1leell

DSSP -hh11hhhhhhhhHHHHHHhhhh1111LLL11111hhhhhhhh1111111111hh
Query -gl1ldadlxptRSACIAifearaqhpWPPRVatlphwpliyagaleglhdlelartvda 274
ident
Sbjct lgvtgvageplpVDSEKD-----ifdYIQWK----- 318
DSSP 111111111111LLLHHH-----hhhHLLL-----

DSSP hhhhhhhhhhhhh1111
Query aaqavqrfvaridratkr 292
ident
Sbjct -----yrepkdrse 327
DSSP -----111hhhh111

```

No 275: Query=mol1A Sbjct=8icia Z-score=6.6

[back to top](#)

```

DSSP -----
Query ----- 0
ident
Sbjct etlnggitdmltelanfeknvsqaihkyayrkaasviakypkiksgaeakklpgvgtk 60
DSSP 1111hhhhhhhhhhhhhh1111hhhhhhhhhhhhhhhhhh111111hhhhhh11111hh

DSSP -----1111111111h
Query -----aapyspntl 11
ident
Sbjct iaekideflatgklrklekirqddtssinfltrvsgigpsaarkfvdegiktledlrkn 120
DSSP hhhhhhhhhhh1111hhhhhhhhhhhhhhhhhh111111hhhhhhhhhh1111hhhhhh

DSSP hhhhhhhhhhh1111hhhhhhHHHHHHHHHHHHHH-LLLL11LLLLEEEHHHHHHHHhh1
Query rslrdrldtqvaerqgvfgrlqRHVAXIVVAQFAA-TLTDdtGAPLLLKVGSSLELrrg 70
ident | |
Sbjct edklnhhqriglkyfgdfekriPREEMLQMQDIVLnEVKKvdSEYIATVCGSFRGA--- 177
DSSP hhh11hhhhhhhh11hhhh1leEHHHHHHHHHHHHHHHHHH1LLEEEELLLLLLLL---

DSSP 1111LLLLEEEEL-----1LHHHHHHHHHHHHhh1111eeEEELLLEEL11
Query ipdsrTSKDFATVAR-----rDIELIHEQLADAGetgwegftAIFTAPEEIaa 118
ident | | | |
Sbjct ---eSSGDMDVLLThpsftsestqpkLLHQVVEQLQKVH-----FITDTLSKG-- 223
DSSP ---LEELLEEEEEEe1111111111hHHHHHHHHHHHLL-----LEEEEEEEL--

```

DSSP 1111LLLLLLLLLLLLL--EEEEEEEEEEEEEL-LLLL1111eeeeelhhhh11111lee  
Query pgxpVKPRRFTAKLSYRG--RAFATVPIEVSSV-EAGNadqfdtlttsdalglvgvpaava 175  
ident | |  
Sbjct ----ETKFMGVCQLPSKNdeKEYPHRRIDIRLIpKDQY----- 257  
DSSP ----LLEEEEEELLLLLL11LLLLLEEEEEEEEEeHHHH-----

DSSP eeellhHHHHhhhhhhhh11111111111hhhhHHHHHH-----  
Query vpcxtiPWQIaqklhavtavleepkandrahdLvDLQLE----- 215  
ident | |  
Sbjct ----yCGVL-----yftgSDIFNKnmrahalekgftineytirp 292  
DSSP ----hHHHH-----hh11LHHHHhhhhhhhh11eeell11lee

DSSP --hh11hhhhhhhhHHHHhhhhhh1111LLLLL1111hhhhhhhh111111111hh  
Query --gl1ldadlxptrSACIAifearaqhpWPPRVatlpwpliYagalegldhlelartvd 273  
ident | |  
Sbjct lgvTgvageplpvdSEKD-----ifdYIQWK----- 318  
DSSP 111111111111LHHH-----hhhLLLL-----

DSSP hhhhhhhhhhhhh1111  
Query aaaqavqrfvaridratkr 292  
ident | |  
Sbjct -----yrepkdrse 327  
DSSP -----111hh111

No 276: Query=mol1A Sbjct=8icpA Z-score=6.6

[back to top](#)

DSSP ----- 0  
Query -----  
ident | |  
Sbjct etlnggitdmltelanfeknvsqaihknayrkaasviakyphkiksgaeakklpgvgtk 60  
DSSP 1111hhhhhhhhhhhhhh1111hhhhhhhhhhhhhh111111hhhh11111hh

DSSP -----111111111h  
Query -----aapyspptnl 11  
ident | |  
Sbjct iaekideflatgklrklekirqddtsssinf1trvsgigpsaarkfvdegiktledlrkn 120  
DSSP hhhhhhhhh1111hhhhhhhhhhhhhh111111hhhhhhhh1111hhhhhh1

DSSP hhhhhhhhhhh1111hhhhHHHHHHHHHHHH-LLLL11LLLLEEEEHHHHHHhh1  
Query rslrdrltqvaerqgvfgrlqRHVAXIVVAQFAA-TLTDdtGAPLLLKGGSSLELrrg 70  
ident | |  
Sbjct edklnhhqriglkygdfekriPREEMLQMqDIVLnEVKKvdSEYIATVCGSFRRGA--- 177  
DSSP hhh11hhhhhhhh11hhhh11eEHHHHHHHHHHHHhhHHHH11LLEEEELLLLLL---

DSSP 1111LLLLLEEEEL-----1LHHHHHHHHHHHHhh1111eeEELLEEL11  
Query ipdsrTSKDFATVAR-----rDIELIHEQLADAGetgwegftAIFTAPEEIaa 118  
ident | | | |  
Sbjct ----eSSGDMDVLLThpsftsestkpqkLLHQVVEQLQKVH-----FITDTLSKG-- 223  
DSSP ----1EELLEEEEEEe1111111111hHHHHHHHHHHLL-----LEEEEEEEL--

DSSP 1111LLLLLEEEEEEEL--EEEEEEEEEEEEEL-LLLL1111eeeeelhhhh11111lee  
Query pgxpVKPRRFTAKLSYRG--RAFATVPIEVSSV-EAGNadqfdtlttsdalglvgvpaava 175  
ident | |  
Sbjct ----ETKFMGVCQLPSKNdeKEYPHRRIDIRLIpKDQY----- 257  
DSSP ----LLEEEEEELLLLLL11LLLLLEEEEEEEEEeHHHH-----

DSSP eeellhHHHHhhhhhhhh11111111111hhhhHHHHHH-----  
Query vpcxtiPWQIaqklhavtavleepkandrahdLvDLQLE----- 215  
ident | |  
Sbjct ----yCGVL-----yftgSDIFNKnmrahalekgftineytirp 292  
DSSP ----hHHHH-----hh11LHHHHhhhhhhhh11111111111

DSSP --hh11hhhhhhhhHHHHHHhhhh1111LLLLL1111hhhhhhhh111111111hh  
Query --gl1ldadlxptrSACIAifearaqhpWPPRVatlpwpliYagalegldhlelartvda 274



```

Query ----- 0
ident
Sbjct etlnggitdmltelanfeknvsqaihkynayrkaasviakyphkiksgaeakklpgvgtk 60
DSSP 1111hhhhhhhhhhhhhhhh1111hhhhhhhhhhhhhhhh111111hhhhh11111hh

DSSP -----111111111h
Query -----aapyspsptnl 11
ident
Sbjct iaekideflatgklrklekirqddtsssinfltrvsgigpsaarkfvdegiktledlrkn 120
DSSP hhhhhhhhh1111hhhhhhhhhhhhhhhh111111hhhhhhhhhh1111hhhhhh1

DSSP hhhhhhhhhhh1111hhhhHHHHHHHHHHHHHH-LLLL11LLLEEEHHHHHHhh1
Query rslrdrltqvaerqgvfgrlqRHVAXIVVAQFAA-TLTDdtGAPLLLVKGGSSLELrrg 70
ident
Sbjct edklnhhqriglkyfgdfekriPREEMLQMQDIVLnEVKKvdSEYIATVCGSFRRGA--- 177
DSSP hhh11hhhhhhhh1hhhh1leEHHHHHHHHHHHHHHHHH1LLEEEELLLLLL---

DSSP 1111LLLEEEEL-----1LHHHHHHHHHHHHhh1111eeEELLEEL11
Query ipdsrTSKDFATVAR-----rDIELIHEQLADAGetgwegftAIFTAPEEIaa 118
ident
Sbjct ---eSSGDMVLLThpsftsestkqpkLLHQVVEQLQKVH-----FITDTLSKG-- 223
DSSP ---LEELLEEELLLL11111111hhHHHHHHHHHLL-----LEEEEL---

DSSP 1111LLLEEEEL---EEEEEEEEEL-LLLL1111eeehhhh11111ee
Query pgxpVKPRRFTAKLSYRG--RAFATVPIEVSSV-EAGNadqfdtltsdalglvgvpaava 175
ident
Sbjct ---ETKFMGVCQLPSKNdeKEYPHRRIDIRLIpKDQY----- 257
DSSP ---LEEEELLLL11111111LEEEEEEeHHHH-----

DSSP ee11HHHHhhhhhh111111111111hhhhHHHHH-----
Query vpcxtiPWQIaqlhavlavleekandrahdlvDLQLE----- 215
ident
Sbjct ---yCGVL-----yftgSDIFNKnmrahalekgftineytirp 292
DSSP ---hHHHH-----hh11LHHHHhhhhhhhh1leeeleeee

DSSP --hh11hhhhhhhhHHHHhhhhhh1111LLLL11111hhhhhhhh111111111hh
Query --g1lldadlxptrSACIaifearaqhpWPPRVatlphwplyagalegldhlelartvd 273
ident
Sbjct lgvtgvageplpvdSEKD-----ifdYIQWK----- 318
DSSP 111111111111LHHH-----hhhHLLL-----

DSSP hhhhhhhhhhhhh1111
Query aaaqavqrfvaridratkr 292
ident
Sbjct -----yrepkdrse 327
DSSP -----111hh111

```

No 279: Query=mol1A Sbjct=8icxA Z-score=6.6

[back to top](#)

```

DSSP ----- 0
Query -----
ident
Sbjct etlnggitdmltelanfeknvsqaihkynayrkaasviakyphkiksgaeakklpgvgtk 60
DSSP 1111hhhhhhhhhhhhhhhh1111hhhhhhhhhhhhhhhh111111hhhhh11111hh

DSSP -----111111111h
Query -----aapyspsptnl 11
ident
Sbjct iaekideflatgklrklekirqddtsssinfltrvsgigpsaarkfvdegiktledlrkn 120
DSSP hhhhhhhhh1111hhhhhhhhhhhhhhhh111111hhhhhhhhhh1111hhhhhh1

DSSP hhhhhhhhhhh1111hhhhHHHHHHHHHHHHHH-LLLL11LLLEEEHHHHHHhh1
Query rslrdrltqvaerqgvfgrlqRHVAXIVVAQFAA-TLTDdtGAPLLLVKGGSSLELrrg 70
ident
Sbjct edklnhhqriglkyfgdfekriPREEMLQMQDIVLnEVKKvdSEYIATVCGSFRRGA--- 177

```



```

ident
Sbjct -----yCGVL-----yftgSDIFNKnmrahalekgftineytirp 292
DSSP -----hHHHH-----hhh1LHHHHhhhhhhhh1111leelle11

DSSP -hh1lhhhhhhHHHHhhhhhh1111LLLLL11111hhhhhhhh111111111hh
Query -gl1ldadlxptRSACIaifearaqhpWPPRVatlphwplyagalegldhlelartvda 274
ident
Sbjct lgvTgvageplpVDESEK-----difDYIQW----- 317
DSSP 1111111111111111LHH-----hhHHL-----

DSSP hhhhhhhhhhhhh1111
Query aaqavqrfvaridratkr 292
ident
Sbjct -----kyrepkdrse 327
DSSP -----1111hh111

```

No 281: Query=mol1A Sbjct=8icnA Z-score=6.6

[back to top](#)

```

DSSP ----- 0
Query -----
ident
Sbjct etlnggitdmltelanfeknvsqaihkynayrkaasviakyphkiksgaeakklpgvgtk 60
DSSP 1111hhhhhhhhhhhhhhhh1111hhhhhhhhhhhhhhhh111111hhhh111111hh

```

```

DSSP -----111111111h
Query -----aapyspntnl 11
ident
Sbjct iaekideflatgklrklekirqddtsssinfptrvsgigpsaarkfvdegiktledlrkn 120
DSSP hhhhhhhhh1111hhhhhhhhhhhhhhhh111111hhhhhhhhhh1111hhhhhh1

```

```

DSSP hhhhhhhhhhh1111hhhhHHHHHHHHHHHH-LLLL11LLLEEEHHHHHHhh1
Query rslrdr1tqvaerqgvfgrlqRHVAXIVVAQFAA-TLTDdtGAPLLLVKGGSSLELrrg 70
ident
Sbjct edklnhhqriglkyfgdfekriPREEMLQMqDIVLnEVKkvdSEYIATVCGSFRRGA--- 177
DSSP hhh1lhhhhhhhhhh11eEHHHHHHHHHHHHHHHHH1LLEEEELLLLLL---

```

```

DSSP 11111LLLEEEEL-----1LHHHHHHHHHHHHhh1111eeEEELLEEL11
Query ipdsrTSKDFATVAR-----rDIELIHEQLADAGetgwegftAIFTAPEE1aa 118
ident
Sbjct ---eSSGDMDVLLThpsftsestkpqkLLHQVVEQLQKVH-----FITDTLSKG-- 223
DSSP ---1EELLEEEEEEe1111111111hHHHHHHHHHHLL-----LEEEEEEEL--

```

```

DSSP 1111LLLEEEEEEELL--EEEEEEEEEEEL-LLLL1111eeee1hhhh1111lee
Query pgxpVKPRRFTAKLSYRG--RAFATVPIEVSSV-EAGNadqfdtltsdalglvgpaava 175
ident
Sbjct ---ETKFMGVCQLPSKNdeKEYPHRRIDIRLIpKDQY----- 257
DSSP ---LLEEEEEEELLLL1111111111LEEEEEEeHHHH-----

```

```

DSSP ee11hHHHHhhhhhhhh11111111111hhhhHHHHHH-----
Query vpcxtiPWQIaqklhavtavleekandrahd1vDLQLE----- 215
ident
Sbjct -----yCGVL-----yftgSDIFNKnmrahalekgftineytirp 292
DSSP -----hHHHH-----hhh1LHHHHhhhhhhhh1111leelle11

```

```

DSSP --hh1lhhhhhhHHHHhhhhhh1111LLLLL11111hhhhhhhh111111111hh
Query --gl1ldadlxptrSACIaifearaqhpWPPRVatlphwplyagalegldhlelartvd 273
ident
Sbjct lgvTgvageplpvdSEKD-----ifdYIQWK----- 318
DSSP 1111111111111111LHH-----hhHHL-----

```

```

DSSP hhhhhhhhhhhhh1111
Query aaaqavqrfvaridratkr 292
ident
Sbjct -----yrepkdrse 327
DSSP -----111hh111

```

No 282: Query=mol1A Sbjct=8iczA Z-score=6.6

[back to top](#)

```
DSSP -----
Query ----- 0
ident
Sbjct etlnggitdmltelanfeknvsqaihkynayrkaasviakypkiksgaeakklpgvgtk 60
DSSP 1111hhhhhhhhhhhhhhhh1111hhhhhhhhhhhhhhhh111111hhhh11111hh

DSSP -----111111111h
Query -----aapyspntl 11
ident
Sbjct iaekideflatgklrklekirqddtssinfltrvsgigpsaarkfvdegiktledlrkn 120
DSSP hhhhhhhhh1111hhhhhhhhhhhhhhhh111111hhhhhhhh11111hhhhhh1

DSSP hhhhhhhhhhh1111hhhhHHHHHHHHHHHH-LLLL11LLLEEEHHHHHHhh1
Query rslrdrltqvaerqgvfgrlqRHVAXIVVAQFAA-TLTDdtGAPLLLKGGSSLELrrg 70
ident | |
Sbjct edklnhhqriglkyfgdfekriPREEMLQMQDIVLnEVKKvdSEYIATVCGSFRGA--- 177
DSSP hhh11hhhhhhhh1111111eEHHHHHHHHHHHHHHHH1LLEEEELLLLLL---

DSSP 1111LLLEEEEL-----1LHHHHHHHHHHHHhh1111eeEEELLEEL11
Query ipdsrTSKDFATVAR-----rDIELIHEQLADAGetgwegftAIFTAPEEIAa 118
ident | | | |
Sbjct ---eSSGDMVLLThpsftsestkpqkLLHQVVEQLQKVH-----FITDTLSKG-- 223
DSSP ---LEELLEEEEEEe11111111hhHHHHHHHHHHLL-----LEEEEEE--

DSSP 1111LLLEEEEEEELL--EEEEEEEEEEEL-LLLL1111eeehhhh11111ee
Query pgxpVKPRRFTAKLSYRG--RAFATVPIEVSSV-EAGNadqfdtltsdalglvgvpaava 175
ident | |
Sbjct ---ETKFMGVCQLPSKNdeKEYPHRRIDIRLIpKDQY----- 257
DSSP ---LEEEEEEELLLLL11LLLEEEEEEeHHHH-----

DSSP ee11hHHHHhhhhhhhh1111111111hhhhHHHHH-----
Query vpcxtiPWQIaqlhavlavlepkandrahdlvDLQLE----- 215
ident
Sbjct ----yCGVL-----yftgSDIFNKmrahalekgftineytirp 292
DSSP ----hHHHH-----hh11LHHHHhhhhhhhh1111ee11ee11

DSSP --hh11hhhhhhhhHHHHhhhhhh1111LLLL11111hhhhhhhh11111111hh
Query --g11ldadlxptrSACIaifearaqhpWPPRVatlpwplyagalegldhlelartvd 273
ident |
Sbjct lgvtgvageplpvdSEKD-----ifdYIQWK----- 318
DSSP 111111111111LHHH-----hhhLLLL-----

DSSP hhhhhhhhhhhhh1111
Query aaaqavqrfvaridratkr 292
ident
Sbjct -----yrepkdrse 327
DSSP -----111hh111
```

No 283: Query=mol1A Sbjct=9icbA Z-score=6.6

[back to top](#)

```
DSSP -----
Query ----- 0
ident
Sbjct etlnggitdmltelanfeknvsqaihkynayrkaasviakypkiksgaeakklpgvgtk 60
DSSP 1111hhhhhhhhhhhhhhhh1111hhhhhhhhhhhhhhhh111111hhhh11111hh

DSSP -----111111111h
Query -----aapyspntl 11
ident
```

DSSP hhhhhhhhhhh1111hhhhhhhhhhhhhhhhhhhh111111hhhhhhhhhh1111hhhhhhhh1

DSSP hhhhhhhhhhh1111hhhhHHHHHHHHHHHHHHH-LLLL11LLLEEEHHHHHHHHhh1  
 Query rslrdrltqvaerqgvfgrlqRHVAXIVVAQFAA-TLTDdtGAPLLLKGGSSLELrrg 70  
 ident | |  
 Sbjct edklnhhqriglkygdfekriPREEMLQMqDIVLnEVKKvdSEYIATVCGSFRRGA--- 177  
 DSSP hhh11hhhhhhhhhhhhhh1leEHHHHHHHHHHHHHHHHHh1LLEEEELLLLLLLL---

DSSP 1111LLLEEEEEEEL-----1LHHHHHHHHHHHHhh1111eeEEELLEEL11  
 Query ipdsrTSKDFATVAR-----rDIELIHEQLADAGetgwegftAIFTAPEEIaa 118  
 ident | | | |  
 Sbjct ---eSSGDMDVLLThpsftsestkpqkLLHQVVEQLQKVH-----FITDTLSKG-- 223  
 DSSP ---1EELLEEEEEEe1111111111hhHHHHHHHHHHLL-----LEEEEEEEL--

DSSP 1111LLLEEEEEEEL--EEEEEEEEEEEL-LLLL1111eeee1hhhh111111ee  
 Query pgxpVKPRRFATAKLSYRG--RAFATVPIEVSSV-EAGNadqfdtlttsdalglvgvpaava 175  
 ident | |  
 Sbjct ---ETKFMGVCQLPSKNdeKEYPHRRIDIRLIpKDQY----- 257  
 DSSP ---LLEEEEEEELLLLL11LLLEEEEEEeHHHH-----

DSSP ee11hHHHHhhhhhhhh1111111111hhhhHHHHHH-----  
 Query vpcxtiPWQIaqklhavtavleepkandrahd1vDLQLE----- 215  
 ident  
 Sbjct ---yCGVL-----yftgSDIFNKmrahalekgftineytirp 292  
 DSSP ---hHHHH-----hhh1LHHHHhhhhhhhh1leee1leeee

DSSP --hh11hhhhhhhhHHHHhhhhhh1111LLLL1111hhhhhhhh1111111111hh  
 Query --g11ldadlxptrSACIaifearaqhpWPPRVat1phwplyagalegldhlelartvd 273  
 ident |  
 Sbjct lgtgvageplpvdSEKD-----ifdYIQWK----- 318  
 DSSP 11111111111111LHHH-----hhhLLLL-----

DSSP hhhhhhhhhhhhhhh1111  
 Query aaaqavqrfvaridratkr 292  
 ident  
 Sbjct -----yrepkdrse 327  
 DSSP -----111hh111

No 284: Query=mol1A Sbjct=9ichA Z-score=6.6

[back to top](#)

DSSP -----  
 Query ----- 0  
 ident  
 Sbjct etlnggitdmltelanfeknvsqaihkynayrkaasviakyphkiksgaeakklpgvgtk 60  
 DSSP 1111hhhhhhhhhhhhhh1111hhhhhhhhhhhhhh111111hhhh111111hh

DSSP -----1111111111h  
 Query -----aapyspntnl 11  
 ident  
 Sbjct iaekideflatgklrklekirqddtsssinf1trvsgigpsaarkfvdegiktledlrkn 120  
 DSSP hhhhhhhhh1111hhhhhhhhhhhhhhhh111111hhhhhhhh111111hhhhhh1

DSSP hhhhhhhhhhh1111hhhhHHHHHHHHHHHHHHH-LLLL11LLLEEEHHHHHHHHhh1  
 Query rslrdrltqvaerqgvfgrlqRHVAXIVVAQFAA-TLTDdtGAPLLLKGGSSLELrrg 70  
 ident | |  
 Sbjct edklnhhqriglkygdfekriPREEMLQMqDIVLnEVKKvdSEYIATVCGSFRRGA--- 177  
 DSSP hhh11hhhhhhhhhhhhhh1leEHHHHHHHHHHHHHHHHHh1LLEEEELLLLLLLL---

DSSP 1111LLLEEEEEEEL-----1LHHHHHHHHHHHHhh1111eeEEELLEEL11  
 Query ipdsrTSKDFATVAR-----rDIELIHEQLADAGetgwegftAIFTAPEEIaa 118  
 ident | | | |  
 Sbjct ---eSSGDMDVLLThpsftsestkpqkLLHQVVEQLQKVH-----FITDTLSKG-- 223  
 DSSP ---1EELLEEEEEEe1111111111hhHHHHHHHHHHLL-----LEEEEEEEL--



```

Query  pgxpVKPRRFTAKLSYRG--RAFATVPIEVSSV-EAGNadqfdtlttsdalglvgvpaava 175
ident  | |
Sbjct  ----ETKFMGVCQLPSKNdeKEYPHRRIDIRLIpKDQY----- 257
DSSP   ----LLEEEEEELLLLLL11LLLLLEEEEEEEEeHHHH-----

DSSP   eeellhHHHHhhhhhhhh111111111111hhhhHHHHHH-----
Query  vpcxtiPWQIaqlhavlavleekandrahdlvDLQLE----- 215
ident  |
Sbjct  ----yCGVL-----yftgSDIFNKnmrahalekgftineytirp 292
DSSP   ----hHHHH-----hhh1LHHHHhhhhhhhh1leeeelleeee

DSSP   -hh11hhhhhhHHHHhhhhhh1111LLLLL1111hhhhhhhh1111111111hhh
Query  -gl1ldadlxptRSACIaifearaqhpWPPRVAtlphwpliyagalegldhlelartvda 274
ident  |
Sbjct  lgvgtvageplpVDSEK-----difDYIQWK----- 318
DSSP   111111111111LLHH-----hhHHLLLL-----

DSSP   hhhhhhhhhhhhh1111
Query  aaqavqrfvaridratkr 292
ident  |
Sbjct  -----yrepkdrse 327
DSSP   -----111hh111

```

No 285: Query=mol1A Sbjct=9icfA Z-score=6.6

[back to top](#)

```

DSSP   -----1111111111h
Query  -----aapyspsptnl 11
ident  |
Sbjct  iaekideflatgklrklekirqddtssinfltrvsgigpsaarkfvdegiktledlrkn 120
DSSP   hhhhhhhhh1111hhhhhhhh1hhhhhhhh111111hhhhhhhh1111hhhhhh1

DSSP   hhhhhhhhhhh1111hhhhHHHHHHHHHHHHHH-LLLL11LLLEEEHHHHHHhh1
Query  rslrdr1tqvaerqgvfgrlqRHVAXIVVAQFAA-TLTDdtGAPLLLKGGSSLELrrg 70
ident  | |
Sbjct  edklnhhqriglkyfgdfekriPREEMLQMqDIVLnEVKKvdSEYIATVCGSFRRGA--- 177
DSSP   hhh11hhhhhhhh1hhhh11eHHHHHHHHHHHHHHHHHH1LLEEEELLLLLLLL---

DSSP   11111LLLEEEEL-----1LHHHHHHHHHHHHhh1111eeEEELLEEL11
Query  ipdsrTSKDFATVAR-----rDIELIHEQLADAGetgwegftAIFTAPEEIaa 118
ident  | | | |
Sbjct  ----eSSGDMDVLLThpsftsestkqpkLLHQVVEQLQKVH-----FITDTLSKG-- 223
DSSP   ----1EELLEEEEEEe1111111111hHHHHHHHHHHLL-----LEEEEEEEL--

DSSP   1111LLLEEEEEEEL--EEEEEEEEEEEL-LLLL1111eeee1hhhh1111lee
Query  pgxpVKPRRFTAKLSYRG--RAFATVPIEVSSV-EAGNadqfdtlttsdalglvgvpaava 175
ident  | |
Sbjct  ----ETKFMGVCQLPSKNdeKEYPHRRIDIRLIpKDQY----- 257
DSSP   ----LLEEEEEELLLLLL11LLLLLEEEEEEEEeHHHH-----

DSSP   eeellhHHHHhhhhhhhh111111111111hhhhHHHHHH-----
Query  vpcxtiPWQIaqlhavlavleekandrahdlvDLQLE----- 215
ident  |
Sbjct  ----yCGVL-----yftgSDIFNKnmrahalekgftineytirp 292
DSSP   ----hHHHH-----hhh1LHHHHhhhhhhhh1leeeelleeee

DSSP   -hh11hhhhhhHHHHhhhhhh1111LLLLL1111hhhhhhhh1111111111hhh
Query  -gl1ldadlxptRSACIaifearaqhpWPPRVAtlphwpliyagalegldhlelartvda 274
ident  |
Sbjct  lgvgtvageplpVDSEKD-----ifDYIQWK----- 318

```

DSSP hhhhhhhhhhhhh1111  
Query aaqavqrfvaridratkr 292  
ident  
Sbjct -----yrepkdrse 327  
DSSP -----111111111

No 286: Query=mol1A Sbjct=4phpA Z-score=6.6

[back to top](#)

DSSP -----  
Query ----- 0  
ident  
Sbjct tlnggitdmltelanfeknvsqaihkynayrkaasviakypkiksgaeakklpgvgtki 60  
DSSP 111hhhhhhhhhhhhhh111hhhhhhhhhhhhhh111111hhhhhh111111hhhh

DSSP -----111111111hh  
Query -----aapysspptnlr 12  
ident  
Sbjct aekideflatgklrklekirqddtssinfltrvsgigpsaarkfvdegiktledlrkne 120  
DSSP hhhhhhhhhhh111hhhhhhhh1hhhhhhhhhh111111hhhhhhhh111111hhhhhhhh

DSSP hhhhhhhhhhh1111hhhhHHHHHHHHHHHHHH-LLLL111LLLEEEHHHHHHHHhh11  
Query slrdrltqvaerqgvfgrlqRHVAXIVVAQFAA-TLTDdtGAPLLLKVGGSSELELrgi 71  
ident  
Sbjct dklnhhqriglkyfgdfekriPREEMLQMQDIVLnEVKKvdSEYIATVCGSFRRGA---- 176  
DSSP hh11hhhhhhhh111hhhh1leHHHHHHHHHHHHHHHHHH11LLEEEELHHHHLLL----

DSSP 1111LLLEEEEEEEL-----1LHHHHHHHHHHHHhh111leEEELLEE1111  
Query pdsrTSKDFATVAR-----rDIELIHEQLADAGetgwegftAIFTAPEEiaap 119  
ident  
Sbjct ---eSSGDMDVLLThpsftsestqpkLLHQVVEQLQKVH-----FITDTLSK---- 221  
DSSP ---1EELLEEEEEE11111111111LLHHHHHHHHHLL-----LEEEEEE----

DSSP 1111LLLEEEEEEEL--LEEEEEEEL-LLL1111leeeelhhhh11111leee  
Query gxpVKPRRFTAKLSYR--GRAFATVPIEVSSV-EAGNadqfdtltsdalglvqpaavav 176  
ident  
Sbjct --gETKFMGVCQLPSKndEKEYPHRRIDIRLIpKDQY----- 256  
DSSP --1LLEEEEEE11111111111LLLEEEEEEEL1HHHH-----

DSSP ee11hHHHHhhhhhh1111111111HHHH-----hhhhhhhh  
Query pcxtiPWQIaqklhavtavleekandraHDLV-----dlqllegl 217  
ident  
Sbjct ---yCGVL-----yftgSDIFnknmrahalekgftineytirplgvtg 296  
DSSP ---hHHHH-----hhhlLHHHHhhhhhhhhhhleee111leee11111

DSSP 11hHHHHhhhhHHhhhh1111111111hhhhhhhh1111111111hhhhhh  
Query 11dADLXPtrSACIaifearaqhPWPPRVatlpwhpliyagalegldhlelartvdaaaq 277  
ident  
Sbjct vagEPLPV--DSEK-----difdYIQWKY----- 318  
DSSP 11111111--LLHH-----hhhh11111111-----

DSSP hhhhhhhhhhh1111  
Query avqrfvaridratkr 292  
ident  
Sbjct -----repkdrse 326  
DSSP -----11hhhh111

No 287: Query=mol1A Sbjct=1zquA Z-score=6.6

[back to top](#)

DSSP -----111111111hhhhhhhhhhhh1111hhhh  
Query -----aapysspptnlrslrdrltqvaerqgvfgrlq 33

Sbjct ddtsssinfltrvtgigpsaarklvdegiktledlrknedklnhhqriglkyfedfekri 60  
DSSP 111hhhhhhhh111111hhhhhhhhhh1111hhhhhh11hhhh11hhhhhhhh111hhhhle

DSSP HHHHHHHHHHHHHLL-LLLLLLLLEEEEHHHHHHHHhh11111LLLLEEEEEL-----  
Query RHVAXIVVAQFAATL-TDDTGAPLLLKGGSSLELrrgipdsrTSKDFATVAR----- 85  
ident | | | | |  
Sbjct PREEMLMQDIVLNEvKKLDPEYIATVCGSFRRGA-----eSSGDMVLLThpnftse 113  
DSSP EHHHHHHHHHHHHHHHLLLEEEELHHHHLLL-----1EELEEEEE111111

DSSP -----1LHHHHHHHHHHHHhh1111eeEELLEEL111111LLLLEEEEEEEEELLeEEE  
Query -----rDIELIHEQLADAGetgwegftAIFTAPEEIIaapgxPKPRRFTAKLSYRGrAFA 140  
ident | | | | |  
Sbjct sskqpkLLHRVVEQLQKVR-----FITDTLSKG-----ETKFMGVCQLPSEN-EYP 158  
DSSP 1111hhHHHHHHHHHHLL-----LEEEEEEL-----LLEEEEEELLLL-LLL

DSSP EEEEEEEEL-LLLL1111eeeee1hhhh11111eeeee1hhHHHHhhhhhh11111  
Query TVPIEVSSV-EAGNadqfdt1tsdalglvgvpaavavpcxtiPWQIaqlhavtavleep 199  
ident |  
Sbjct HRRIDIRLIpKDQY-----yCGVL----- 177  
DSSP LEEEEEEEL1HHHH-----hHHHH-----

DSSP 111111hhhhHHHHHH-----hh11hhhhhhhhHHHHhhhhhh  
Query kandrahdlvDLQLE-----g11dadlxptrSACIaifear 237  
ident |  
Sbjct -----yftgSDIFNkmrahalekgftineytirplvgvtgvageplpvdSEQD----- 225  
DSSP -----hh1LHHHHHHhhhhhh1lee1111ee111111111111LHHH-----

DSSP 1111LLLL11111hhhhhhhh1111111111hhhhhhhhhhhhhh1111  
Query aqhpWPPRVat1phwplyagalegldhlelartvdaaaqavqrfvaridratkr 292  
ident  
Sbjct -ifdYIQWR-----yrepkdrse 242  
DSSP -hhhHLLL-----111hhhh11

No 288: Query=mol1A Sbjct=1xslI Z-score=6.6

[back to top](#)

DSSP -----  
Query ----- 0  
ident  
Sbjct tnhnlhiteklevlakaysvqgdkwralgyakainalksfhkpvtsyqeacsipgigkrm 60  
DSSP 1111hhhhhhhhhhhhhhhh111hhhhhhhhhhhhhh111111hhhhhh11111hh

DSSP -----1111111111hhhhh  
Query -----aapyspntlrslr 15  
ident  
Sbjct aekieielesghlrklhdhisevplelfsniwgagtktaqmwyqqgfrsledirsqs1 120  
DSSP hhhhhhhhh111hhhh1111hhhhhhhh111111hhhhhhhh1111hhhhhhhh111

DSSP hhhhhhhhh1111hHHHHHHHHHHHHHHHLL-LLLL1LLLLEEEEHHHHHHHHhh11111  
Query drltqvaerqgvvfGRLQRHVAXIVVAQFAAT-LTDDtGAPLLLKGGSSLELrrgipds 74  
ident | | | | |  
Sbjct ttqqaiglkhsdfLERMPREATEIEQTVQKaAQAFnSGLLCVACGSYRRGK----- 173  
DSSP 1hhhhhhhh1hhhhHLEEHHHHHHHHHHHHHHLLL1LLEEEELHHHHLLL-----

DSSP 1LLLLEEEEEL-----1LHHHHHHHHHHHHhh1111eeEELLE-ELL11LLLLL  
Query rTSKDFATVAR-----rDIELIHEQLADAGetgwegftAIFTAPE-EIAApgXPVKP 125  
ident | | | | |  
Sbjct aTCGDVDVLIThpdgrshrgIFSRLDLSLRQEG-----FLTDDLvsQEEN--GQQQK 223  
DSSP 1EELEEEEE1111111111HHHHHHHHHHHLL-----LEEEEEEeEEEE--LLEE

DSSP EEEEEEE11EEEEEEEEEEEL-LLLL1111eeeee1hhhh11111eeeee1hHHH  
Query RRFTAKLSYrgRAFATVPIEVSSV-EAGNadqfdt1tsdalglvgvpaavavpcxtiPWQ 184  
ident | | | | |  
Sbjct YLGVCRLLPG--PGRRRRLDIIVVpYSEF-----aCAL 254  
DSSP EEEEELLL--LLLLEEEEEEEL1HHHH-----hHHH

DSSP Hhhhhhhhh11111111111111HHHHHHH-----hhhhhll  
 Query IaqlhavlavleekandraHDLVDLQ-----lleglll 219  
 ident  
 Sbjct L-----yftgSAHFNRSmralaktkgmslsehalstavrnrthgckvgp 298  
 DSSP H-----hhl1LHHHHHHhhhhhhllleel111eeellee1111leel

DSSP hhHHHHhhHHHHhhhhhh11111111111111hhhhhhhhhh111111111111hhhhhhhh  
 Query daDLXPtrSACIAifearaqhPPPRVatlphwpliyagalegldhlelartvdaaaqav 279  
 ident |  
 Sbjct grVLP--PTEK-----vfrLLGLP----- 317  
 DSSP l1EELL--LLHH-----hhlHLLL-----

DSSP hhhhhhhhh1111  
 Query qrfvaridratkr 292  
 ident  
 Sbjct ----yrepaerdw 326  
 DSSP ----111hhhh11

No 289: Query=mol1A Sbjct=2gwsM Z-score=6.6

[back to top](#)

DSSP -----  
 Query ----- 0  
 ident  
 Sbjct tnhnlhiteklevlakaysvqgdkwralgyakainalksfhkpvtsyqeacsipgigkrm 60  
 DSSP 1111hhhhhhhhhhhhhhhh11hhhhhhhhhhhhhhhh111111hhhhhh111111hhhh

DSSP -----1111111111hhhhh  
 Query -----aapyspntlrslr 15  
 ident  
 Sbjct aekieilesghlrlkldhisesvpvlelfsniwgagtktaqmwyqgfrslelirdsqasl 120  
 DSSP hhhhhhhhh111hhhh1111hhhhhhhh111111hhhhhhhh111111hhhhhhhh111

DSSP hhhhhhhhh1111hHHHHHHHHHHHHHHHLL-LLLLLLLEEEHHHHHHHHhh1111  
 Query drltqvaerqgvfGRLQRHVAXIVVAQFAATL-TDDTGAPLLLKGGSSLELrrgipds 74  
 ident | | | | | | | | | |  
 Sbjct ttqqaiglkhsydfLERMPREEAETEIEQTVQKAaQAFNSGLLCVACGSYRRGK----- 173  
 DSSP lhhhhhhhh111hhhhHLEEHHHHHHHHHHHHHHHHHLLLLLLLEEELHHHHLLL-----

DSSP lLLLEEEEL-----lLHHHHHHHHHHHHhh1111leeEELLE-ELLL11LLLLL  
 Query rTSKFATVAR-----rDIELIHEQLADAGetgwegftAIFTAPE-EIAApGXPVKP 125  
 ident | | | | | | | | | |  
 Sbjct aTCGDVDVLIThpdgrshrgIFSRLDLSLRQEG-----FLTDDLvsQEEN--GQQQK 223  
 DSSP lEELLEEEL1111111111LHHHHHHHHHHHLL-----LEEEEEEeEEEE--LLEE

DSSP EEEEEEEEl1EEEEEEEEEEEL-LLLL1111leeeelh1111leeeelhHHH  
 Query RRFTAKLSYrgRAFATVPIEVSSV-EAGNadqfdtltsdalglvgvpaavapcxtiPWQ 184  
 ident | | | | | | | | | |  
 Sbjct YLGCRLPG--PGRHRRLDIIVpYSEF-----aCAL 254  
 DSSP EEEEELLL--LLLLEEEEEEELlHHH-----hHHH

DSSP Hhhhhhhhh111111111111HHHHHHH-----hhhhhll  
 Query IaqlhavlavleekandraHDLVDLQ-----lleglll 219  
 ident  
 Sbjct L-----yftgSAHFNRSmralaktkgmslsehalstavrnrthgckvgp 298  
 DSSP H-----hhl1LHHHHHHhhhhhhllleel111eeellee1111leel

DSSP hhHHHHhhHHHHhhhhhh11111111111111hhhhhhhhhh111111111111hhhhhhhh  
 Query dADLXptRSACIAifearaqhPPPRVatlphwpliyagalegldhlelartvdaaaqav 279  
 ident |  
 Sbjct grVLP--TPTEK-----dvrLLGLP----- 317  
 DSSP l1EEL--LLLH-----hhlHLLL-----

DSSP hhhhhhhhh1111  
 Query qrfvaridratkr 292  
 ident

DSSP ----111hhh111

No 290: Query=mol1A Sbjct=8icuA Z-score=6.6

[back to top](#)

DSSP -----  
Query ----- 0  
ident  
Sbjct etlnggitdmltelanfeknvsqaihknayrkaasviakyphkiksgaeakklpgvgtk 60  
DSSP 1111hhhhhhhhhhhhhhhhhh111hhhhhhhhhhhhhhhh111111hhhhh11111hh

DSSP -----111111111h  
Query -----aapyspsptnl 11  
ident  
Sbjct iaekideflatgklrklekirqddtsssinfltrvsgigpsaarkfvdegiktledlrkn 120  
DSSP hhhhhhhhhhh1111hhhhhhhhhhhhhhhhhh111111hhhhhhhhhh1111hhhhhhhh

DSSP hhhhhhhhhhhhh1111hhhhhhHHHHHHHHHHHHH-LLLL11LLLLEEEHHHHHHHHhh1  
Query rslrdrltqvaerqgvfgrlqRHVAXIVVAQFAA-TLTDdtGAPLLLVKGGSSLELrrg 70  
ident | |  
Sbjct edklnhhqriglkyfgdfekriPREEMLQMQDIVLnEVKKvdSEYIATVCGSFRGA--- 177  
DSSP hhh11hhhhhhhhhhhhhh11eHHHHHHHHHHHHHHHHhh11LLEEEELLLLLL---

DSSP 11111LLLLEEEEL-----1LHHHHHHHHHHHHhh1111eeEEELLEEL11  
Query ipdsrTSKDFATVAR-----rDIELIHEQLADAGetgwegftAIFTAPEEIIaa 118  
ident | | | |  
Sbjct ---eSSGMDVLLThpsftsestkpqkLLHQVVEQLQKVH-----FITDTLSKG-- 223  
DSSP ---1EELLEEEEEEe1111111111hHHHHHHHHHHHLL-----LEEEELLLL--

DSSP 1111LLLLEEEEEEELL--EEEEEEEEEEEL-LLLL1111eeee1hhhh11111lee  
Query pgxpVKPRRFTAKLSYRG--RAFATVPIEVSSV-EAGNadqfdtltsdalglvgvpaava 175  
ident | |  
Sbjct ---ETKFMGVCQLPSKNdeKEYPHRRIDIRLIpKDQY----- 257  
DSSP ---LLEEEEEEELLLLL11LLLLEEEEEEeHHHH-----

DSSP ee11hHHHHhhhhhhhh1111111111hhhhHHHHHH-----  
Query vpcxtiPWQIaqlhavtavleekandrahdlvDLQLE----- 215  
ident  
Sbjct -----yCGVL-----yftgSDIFNKnmrahalekgftineytirp 292  
DSSP ---hHHHH-----hhh1LHHHHhhhhhhhh11eeee1leeee

DSSP -hh11hhhhhhhhHHHHHHhhhh1111LLL11111hhhhhhhh1111111111hh  
Query -gl1ldadlxptRSACIAifearaqhpWPPRVatlphwpliyagalegldhlelartvda 274  
ident  
Sbjct lgvtgvageplpVDESKD-----ifdYIQWK----- 318  
DSSP 111111111111LLLHHH-----hhhLHLLL-----

DSSP hhhhhhhhhhhhh1111  
Query aaqavqrfvaridratkr 292  
ident  
Sbjct -----yrepkdrse 327  
DSSP -----111hhh111

No 291: Query=mol1A Sbjct=7ickA Z-score=6.6

[back to top](#)

DSSP -----  
Query ----- 0  
ident  
Sbjct etlnggitdmltelanfeknvsqaihknayrkaasviakyphkiksgaeakklpgvgtk 60  
DSSP 1111hhhhhhhhhhhhhhhhhh111hhhhhhhhhhhhhhhh111111hhhhh11111hh

DSSP -----111111111h

```

ident
Sbjct iaekideflatgklrklekirqddtssinfltrvsgigpsaarkfvdegiktledlrkn 120
DSSP hhhhhhhhhhh1111hhhhhhhhhhhhhhhhhhhh111111hhhhhhhhhh1111hhhhhhhh

DSSP hhhhhhhhhhh1111hhhhhhHHHHHHHHHHHHHH-LLLL11LLLLEEEHHHHHHHHhh1
Query rslrdrldtqvaerqgvfgrlqRHVAXIVVAQFAA-TLTDdtGAPLLLKVGSSLELrrg 70
ident | |
Sbjct edklnhhqriglkyfgdfekriPREEMLQMQDIVLnEVKKvdSEYIATVCGSFRGA--- 177
DSSP hhh11hhhhhhhh11hhhhhh1eHHHHHHHHHHHHHHHHHH1LLLLEEEELHHHHLL---

DSSP 1111LLLLEEEEL-----1LHHHHHHHHHHHHhh1111eeEEELLLEEL11
Query ipdsrTSKDFATVAR-----rDIELIHEQLADAGetgwegftAIFTAPEEIaa 118
ident | | | |
Sbjct ---eSSGDMDVLLThpsftsestqpkLLHQVVEQLQKVH-----FITDTLSKG-- 223
DSSP ---LEELLEEEEEEe1111111111hhHHHHHHHHHHLL-----LEEEEEEEL--

DSSP 1111LLLLEEEEEEEL--EEEEEEEEEEEL-LLLL1111eeeee1hhhh11111ee
Query pgxpVKPRRFTAKLSYRG--RAFATVPIEVSSV-EAGNadqfdtltsdalglvgvpaava 175
ident | |
Sbjct ---ETKFMGVCQLPSKNdeKEYPHRRIDIRLIpKDQY----- 257
DSSP ---LEEEEEEELLLL11LLLLEEEEEEeHHHH-----

DSSP eeellhHHHHhhhhhhhh1111111111hhhhHHHHHH-----
Query vpcxtiPWQIaqlhavlavlepkandrahdlvDLQLE----- 215
ident
Sbjct ---yCGVL-----yftgSDIFNKmrahalekgftineytirp 292
DSSP ---hHHHH-----hhh1LHHHHHHhhhhhhhh1leee1leeee

DSSP -hh11hhhhhhhhHHHHHHhhhhhh1111LLL11111hhhhhhhhhh1111111111hh
Query -gl1ldadlxptRSACIAifearaqhpWPPRVatlphwpliyagalegldhlelartvda 274
ident
Sbjct lgvtgvageplpVDSEKD-----ifdYIQWK----- 318
DSSP 111111111111LLLHHH-----hhhHLLL-----

DSSP hhhhhhhhhhhhh1111
Query aaqavqrfvaridratkr 292
ident
Sbjct -----yrepkdrse 327
DSSP -----111hhhh11

```

No 292: Query=mol1A Sbjct=8icwA Z-score=6.6

[back to top](#)

```

DSSP -----
Query ----- 0
ident
Sbjct etlnggitdmltelanfeknvsqaihkynayrkaasviakypkiksgaeakklpgvgtk 60
DSSP 1111hhhhhhhhhhhhhh1111hhhhhhhhhhhhhhhhhh111111hhhhhh11111hh

DSSP -----1111111111h
Query -----aapyspntl 11
ident
Sbjct iaekideflatgklrklekirqddtssinfltrvsgigpsaarkfvdegiktledlrkn 120
DSSP hhhhhhhhhhh1111hhhhhhhhhhhhhhhhhh111111hhhhhhhhhh1111hhhhhh

DSSP hhhhhhhhhhh1111hhhhhhHHHHHHHHHHHHHH-LLLL11LLLLEEEHHHHHHHHhh1
Query rslrdrldtqvaerqgvfgrlqRHVAXIVVAQFAA-TLTDdtGAPLLLKVGSSLELrrg 70
ident | |
Sbjct edklnhhqriglkyfgdfekriPREEMLQMQDIVLnEVKKvdSEYIATVCGSFRGA--- 177
DSSP hhh11hhhhhhhh11hhhhhh1LHHHHHHHHHHHHHHHHHH1LLLLEEEELLLL---

DSSP 1111LLLLEEEEL-----1LHHHHHHHHHHHHhh1111eeEEELLLEEL11
Query ipdsrTSKDFATVAR-----rDIELIHEQLADAGetgwegftAIFTAPEEIaa 118
ident | | | |
Sbjct ---eSSGDMDVLLThpsftsestqpkLLHQVVEQLQKVH-----FITDTLSKG-- 223
DSSP ---LLLLEEEEEE1111111111hhHHHHHHHHHHLL-----LEEEEEEEL--

```

DSSP 1111LLEEEEEEEEEELL--EEEEEEEEEEEEEL-LLLL1111leeeelhhhh1111lee  
 Query pgxpVKPRRFTAKLSYRG--RAFATVPIEVSSV-EAGNadqfdtlttsdalglvgvpaava 175  
 ident | |  
 Sbjct ---ETKFMGVCQLPSKNdeKEYPHRRIDIRLIpKDQY----- 257  
 DSSP ---LLEEEEEELLLLL1111LLEEEEEELLLLL-----

DSSP ee11hHHHHHHhhhhhh111111111111hhhhHHHHHH-----  
 Query vpcxtiPWQIAQklhavtavleepkandrahdLvDLQLE----- 215  
 ident | |  
 Sbjct ---yCGVLYF-----tGSDIFNKnmrahalekgftineytirp 292  
 DSSP ---hHHHHHL-----11LHHHHHHhhhhhh1111leee111lee

DSSP -hh11hhhhhhHHHHHHhhhhhh1111L1111hhhhhhhh1111111111hh  
 Query -gl1ldadlxptRSACIaifearaqhpWPPRVat1phwpliyagalegldhlelartvda 274  
 ident | |  
 Sbjct lgvTgvageplpVDEK-----difdYIQWK----- 318  
 DSSP 111111111111L111111111111L111111111111L111111111111L

DSSP hhhhhhhhhhhhh1111  
 Query aaqavqrfvaridratkr 292  
 ident |  
 Sbjct -----yrepkdrse 327  
 DSSP -----111111111

No 293: Query=mol1A Sbjct=1xsnA Z-score=6.6

[back to top](#)

DSSP -----  
 Query ----- 0  
 ident |  
 Sbjct hnlhiteklevlakaysvqgdkwralgyakainalksfhkpvtsyqeacsiPgigkrmae 60  
 DSSP 11111hhhhhhhhhhhh1111hhhhhhhhhhhh11111111hhhhhh11111hhhhhh

DSSP -----111111111hhhhhh  
 Query -----aapyspntlrsldr 17  
 ident |  
 Sbjct kiieilesghlrkldhisesvpvlelfsniwgagtktaqmwyqqgfrsleDirsqasltt 120  
 DSSP hhh1111111hhhh1111hhhhhhhh11111111hhhhhhhh11111hhhhhh1111h

DSSP hhhhhhh1111hhhhHHHHHHHHHHHHHLL-LLLLLLLEEEHHHHHHHHhh11111L  
 Query ltqvaerqgvfgrlQRHVAXIVVAQFAATL-TDDTGAPLLLVKGGSSLELrrgipdsrT 76  
 ident | | | |  
 Sbjct qqaiGlkhysdflerMPREEATEIEQTVQKAaQAFNSGLLCVACGSYRRGK-----aT 173  
 DSSP hhhhhhh111hh11EEHHHHHHHHHHHHHLLLLLLLLEEEELHHHHLL-----1E

DSSP LLEEEEEEL-----1LHHHHHHHHHHHHhh1111eeEELLEELL1111LLEEE  
 Query SKDFATVAR-----rDIELIHEQLADAGetgwegftaIFTAPEEIAapgxPVKPRRF 128  
 ident | | | |  
 Sbjct CGDVDVLIthpdrshrGIFSRLDSLRLQEG-----FLTDDLVSQeengQQQKYLg 224  
 DSSP EEEEEEEEL11111111LHHHHHHHHHHLL-----LEEEEEEEL1111LLEEE

DSSP EEEEE11EEEEEEEEEEEL-LLLL1111leeeelhhhh1111leeeel1hHHHHhh  
 Query TAKLSYrgRAFATVPIEVSSV-EAGNadqfdtlttsdalglvgvpaavvpcxtiPWQIaQ 187  
 ident | |  
 Sbjct VCRLPG--PGRRRRRLDIIVVpYSEF-----aCALL-- 253  
 DSSP EELLLL--LLLLLEEEEEEL1HHHH-----hHHHH--

DSSP hhhhh111111111111HHHHHHH-----hhhh11hHH  
 Query klhavtavleepkandraHDLVLDLQ-----lleg11ldAD 222  
 ident | |  
 Sbjct -----yftgSAHFNRSmralaktkgmslsehalstavrntHgavpgpRV 299  
 DSSP -----hh1LHHHHHHhhhhhh11lee111lee11ee1111lee11EE

DSSP HHHHHHHHHhhhh1111L1111hhhhhhhh1111111111hhhhhhhh  
 Query LXptRSACIaifearaqhpWPPRVat1phwpliyagalegldhlelartvdaaaqavqrf 282

Sbjct LP--TPTEK-----dvfRLLGL----- 314  
DSSP LL--LLLHH-----hhHHLLL-----

DSSP hhhhhh1111  
Query varidratkr 292  
ident  
Sbjct pyrepaerdw 324  
DSSP 1111hhhh11

No 294: Query=mol1A Sbjct=3pncA Z-score=6.6

[back to top](#)

DSSP -----  
Query ----- 0  
ident  
Sbjct tnhnlhiteklevlakaysvqgdkwralgyakainalksfhkpvtisyqeacsipigikrm 60  
DSSP 1111hhhhhhhhhhhhhhhhhh11hhhhhhhhhhhhhhhh11111111hhhhhh1111hhhh

DSSP -----111111111hhhhh  
Query -----aapyspptnlrslr 15  
ident  
Sbjct aekieielesghlrkldhisesvpvlelfsniwgagtktaqmwyqqgfrsleldirsqasl 120  
DSSP hhhhhhhhh111hhhh1111hhhhhhhh111111hhhhhhhh11111hhhhhh111

DSSP hhhhhhhhh1111hHHHHHHHHHHHHHHHLL-LLLLLLLLLEEEHHHHHHhh1111  
Query drltqvaerqgvfGRLQRHVAXIVVAQFAATL-TDDTGAPLLLVKGSSLELrrgipds 74  
ident  
Sbjct ttqqaiglkhsydfLERMPREEATEIEQTVQKAaQAFNSGLLCVACGSYRRGK----- 173  
DSSP 1hhhhhhhh11hhhhHLLLEHHHHHHHHHHHHHLLLLLLLEEEELHHHHLLL-----

DSSP 1LLLLLEEEEL-----1LHHHHHHHHHHHHhh1111eeEEELLEEL11111LLE  
Query rTSKDFATVAR-----rDIELIHEQLADAGetgwegftAIFTAPEElaapgxPKPR 126  
ident  
Sbjct aTCGDVDVLIThpdgrshrgIFSRLLDSLREQE-----FLTDDLVKG-----ETKY 219  
DSSP 1EELEEEEEE11111111LHHHHHHHHHHLL-----LEEEEEEEL-----LLEE

DSSP EEEEEEE11EEEEEEEEEEEL-LLLL1111eeeee1hhhh11111eeeee1hHHHH  
Query RFTAKLSYrgRAFATVPIEVSSV-EAGNadqfdtlttsdalglvgvpaavavpcxtiPWQI 185  
ident  
Sbjct LGVCRLPG--PGRRRRLDIIVVpYSEF-----aCALL 250  
DSSP EEEELLLL--LLLLLEEEEEEEL1HHHH-----hHHHH

DSSP hhhhhhh111111111111HHHHHH-----hhhh11hHHHHh  
Query aqklhavtavlepkandraHDLVDLQ-----1leg111dADLXp 225  
ident  
Sbjct -----yftgSAHFNRSmralaktgmslsehalsstavrvkvgpRVLP- 293  
DSSP -----hhhlLHHHHHHhhhhhh11eeel111eeel11111111EEEL-

DSSP hHHHHhhhhhh1111LLLLL1111hhhhhhhh1111111111hhhhhhhhhhhh  
Query tRSACIaifearaqhpWPPRVAtlphwplyagalegl dhlelartvdaaaqavqrffvar 285  
ident  
Sbjct -TPTEK-----dvfRLLGLP-----yr 309  
DSSP -LLLHH-----hhHHLLL-----11

DSSP hhh1111  
Query idratkr 292  
ident  
Sbjct epaerdw 316  
DSSP 1hhh111

No 295: Query=mol1A Sbjct=4uawA Z-score=6.6

[back to top](#)





```
DSSP  LLLLLLEEEEL-----1LHHHHHHHHHHhh1111eeEEELLE-ELLL11LLLL
Query  RTSKDFATVAR-----rDIELIHEQLADAGetgwegftAIFTAPE-EIAApgXPVKP 125
ident  | | | | |
Sbjct  ATCGDVDVLIThpdgrshrgIFSRLDLSLRQEG-----FLTDDLvsQEEN--GQQQK 223
DSSP  LEELEEEEEE1111111111HHHHHHHHHLL-----LEEEEEEeEEEE--LLEE

DSSP  EEEEEEE11EEEEEEEEEEEL-LLLL1111eeeee1hHHH111111eeeee1hHHH
Query  RRFTAKLSYrgRAFATVPIEVSSV-EAGNadqfdt1tsdalglvgvpaavavpctiPWQ 184
ident  | | | | |
Sbjct  YLGCRLPG--PGRRHRLDIIVVpYSEF-----aCAL 254
DSSP  EEEEELLL--LLLLLEEEEEEEL1HHHH-----hHHH

DSSP  Hhhhhhhhh111111111111HHHH-----hhhhhhhh11hhHHH
Query  IaqklhavtavleepkandraHDLV-----dlqllegllldaDLX 224
ident  | | | | |
Sbjct  L-----yftgSAHFnrsmralaktkgmslsehalstavvckvgpgrVLP 298
DSSP  H-----hhh1LHHHhhhhhhhhhh11lee1111ee1111111111EEL

DSSP  HhhHHHhhhhhh111LLLLL11111hhhhhhhh1111111111hhHHHHhhhhhh
Query  PtrSACIaifearaqhPWPRvatlphwpliayagalegdhlelartvdaAAQAvqrFva 284
ident  | | | | |
Sbjct  T--PTEK----dvfrLLGLP-----yrepaerdwLEHH----- 325
DSSP  L--LLHH----hhhhLHLL-----11hhhh111LLLL-----

DSSP  hhh1111
Query  ridratkr 292
ident
Sbjct  -----hh 327
DSSP  -----11
```

No 297: Query=mol1A Sbjct=4rq1A Z-score=6.6

[back to top](#)

```
DSSP  -----
Query  ----- 0
ident
Sbjct  tlngitdmltelanfeknvsqaihkynayrkaasviakyphkiksgaeakklpgvgtki 60
DSSP  111hhhhhhhhhhhhhh1111hhhhhhhhhhhhhh111111hhhh111111hhh

DSSP  -----111111111h
Query  -----aapyspntl 11
ident
Sbjct  aekideflatgklrklekirqddtssinfltrvsgigpsaarkfvddegiktledlrkne 120
DSSP  hhhhhhhhh111hhhhhh11hhhhhhhh111111hhhhhhhh1111hhhhhh1h

DSSP  hhhhhhhhhhh1111hHHHHHHHHHHHHHHHHHH-LLLL11LLLLEEEHHHHHHhh1
Query  rslrdrltqvaerqgvfGRLQrHVAXIVVAQFAA-TLTDdtGAPLLLVKGGSLElrrg 70
ident  | | | | |
Sbjct  dklnhhrigrlyfgdfeKRIP-REEMLQMDIVLnEVKkvdSEYIATVCGSFRRG---- 175
DSSP  hh11hhhhhh11hhhhLLEE-HHHHHHHHHHHHHHHHHH11LLLLEELLHHHHL----

DSSP  111LLLLLEEEEL-----1LHHHHHHHHHHhh1111eeEEELLLEE111
Query  ipdSRTSKDFATVAR-----rDIELIHEQLADAGetgwegftAIFTAPEEiaa 118
ident  | | | | |
Sbjct  --AESSGDMDVLLThpsftsestkpLKHVVVEQLQKVH-----FIDTLSK--- 221
DSSP  ---LLEELLEEEEL111111111111HHHHHHHHHLL-----LEEEEEE---

DSSP  1111LLLEEEEEEEL--EEEEEEEEEEEL-LLLL1111eeeee1hHHH11111ee
Query  pgxpVKPRRFTAKLSYRG--RAFATVPIEVSSV-EAGNadqfdt1tsdalglvgvpaava 175
ident  | | | | |
Sbjct  ---gETKFMGVCQLPSKNdeKEYPHRRIDIRLIpKDQY----- 256
DSSP  ---1LLEEEEEEELLLLLL11LLLLLEEEEEEEL1HHHH-----

DSSP  ee11hHHHHhhhhhh111111111111HHHH-----hhhhhh
```

```

ident |
Sbjct -----yCGVL-----yftgSDIFnknmrahalekgftineytirplgvt 295
DSSP -----hHHHH-----hh1LHHHHhhhhhhhhleeel11lee1111

DSSP h11hhHHHHhhHHHHhhhhhh111LLLLL11111hhhhhhhh111111111hhhhh
Query 111daDLXPtrSACIaifearaqhWPPRVatlpwpli yagalegldhlelartvdaaa 276
ident |
Sbjct gvagePLPV--DSEK----difdYIQWKY----- 318
DSSP 11111LLL--LHH-----hhhhHLLL-----

DSSP hhhhhhhhhhh1111
Query qavqrfvaridratkr 292
ident |
Sbjct -----repkdr 324
DSSP -----11hhhl

```

No 298: Query=mol1A Sbjct=3pmnA Z-score=6.6

[back to top](#)

```

DSSP ----- 0
Query -----
ident |
Sbjct atnhnlhiteklevlakaysvqgdkwralgyakainalksfhkpvtsyqeacsipgigkr 60
DSSP 11111hhhhhhhhhhhhhhhh111hhhhhhhhhhhhhh1111111hhhhhh1111hh

DSSP -----111111111hhhh
Query -----aapyspptnlrsl 14
ident |
Sbjct maekieielesghlrkldhisesvpvlelfsniwgagtktaqmwyqqgfrslelirsqas 120
DSSP hhhhhhhhhhh111hhhh111hhhhhhhh111111hhhhhhhh11111hhhhhhhh11

DSSP hhhhhhhhh1111hHHHHHHHHHHHHHHHLL-LLLLLLLEEEHHHHHHHHhh1111
Query rdr1tqvaerqgvfGRLQRHVAXIVVAQFAATL-TDDTGAPLLLKGGSSLELrrgipd 73
ident | | |
Sbjct lttqqaiglkhysdfLERMPREEATEIEQTVQKAaQAFNSGLLCVACGSYRRGK----- 174
DSSP 11hhhhhhhh111hhHLEEHHHHHHHHHHHHHHLLLLLLLEEEELHHHHLLL-----

DSSP 11LLLLLEEEEL-----1LHHHHHHHHHHHHhh1111eeEEELLEEL11111LLL
Query srTSKDFATVAR-----rDIELIHEQLADAGetgwegftAIFTAPEElaapgxPKP 125
ident | | |
Sbjct -aTCGDVDVLIThpdgrshrgIFSRLLDSLREQ-----FLTDDLKVG-----ETK 219
DSSP -1EELLEEEEEE11111111LHHHHHHHHHHHLL-----LEEEEEEEL-----LLE

DSSP EEEEEEEEE11EEEEEEEEEEEL-LLLL1111eeeee1hhhh11111eeeee1hHHH
Query RRFTAKLSYrgRAFATVPIEVSSV-EAGNadqfdtltsdalglvqpaavavpcxtiPWQ 184
ident | |
Sbjct YLGVCRPLPG--PGRRHRRLDIIVpYSEF-----aCAL 250
DSSP EEEEELLL--LLLLLEEEEEEEL1HHHH-----hHHH

DSSP Hhhhhhhhh11111111111HHHHHHH-----hhhh11hHHHHhHHH
Query IaqlhavantlepkandraHDLVDLQ-----11eg111dADLXptRSA 229
ident |
Sbjct L-----yftgSAHFNRSmralaktkgmslsehalstavpgRVLP--TPT 292
DSSP H-----hh1LHHHHHHhhhhhh11eeel11lee111LEEL--LLL

DSSP HHhhhhhh1111LLLLL1111hhhhhhhh111111111hhhhhhhhhhhhhhhh1
Query CIaifearaqhWPPRVatlpwpli yagalegldhlelartvdaaaqavqrfvaridra 289
ident |
Sbjct EK-----dvfRLLGLP-----yrepae 309
DSSP HH-----hhHLLL-----111hhh

DSSP 111
Query tkr 292
ident |
Sbjct rdw 312
DSSP 111

```

No 299: Query=mol1A Sbjct=4z6eA Z-score=6.6

[back to top](#)

```
DSSP -----
Query ----- 0
ident
Sbjct tlnggitdmltelanfeknvsqaihkynayrkaasviakypkiksgaeakklpgvgtki 60
DSSP 111hhhhhhhhhhhhhhhhhh111hhhhhhhhhhhhhhhh1111111hhhhhh11111hhhh

DSSP -----111111111hh
Query -----aapyspntlr 12
ident
Sbjct aekideflatgklrklekirqddtssinfltrvsgigpsaarkfvddegiktledlrkne 120
DSSP hhhhhhhhhhh111hhhhhhhh1hhhhhhhhhh1111111hhhhhhhhhh11111hhhhhhhh1h

DSSP hhhhhhhhhhh1111hHHHHHHHHHHHHHHHHHL-LLLLLLLLLLEEEHHHHHHHHhh11
Query slrdrltqvaerqgvvfGRLQRHVAXIVVAQFAAT-LTDDTGAPLLLKVGGSSELELrgi 71
ident
Sbjct dklnhhqriglkyfgdfEKRIPREEMLMQDIVLNeVKKVDSEYIATVCGSFRRGA---- 176
DSSP hhl1hhhhhhhh1hhhhLLEEEHHHHHHHHHHHHHHHHHLLEEEEEEELLLLLL----

DSSP 1111LLLLLEEEEL-----1LHHHHHHHHHHHHhh1111eeEELLEEL111
Query pdsrTSKDFATVAR-----rDIELIHEQLADAGetgwegftAIFTAPEElaap 119
ident
Sbjct ---eSSGDMDVLLThpsftses tkqpkLLHQVVEQLQKVH-----FITDTLSKG--- 222
DSSP ---1EELLEEEEE111111111111HHHHHHHHHHHL-----LEEEEEEL---

DSSP 1111LEEEEEEEL--LEEEEEEEEEEL-LLLL1111eeeee1hhhh11111eee
Query gxpVKPRRFTAklSYR--GRAFATVPIEVSSV-EAGNadqfdtltaldglvgsaavav 176
ident
Sbjct ---ETKFMGVCQLPSKndEKEYPHRRIDIRLlpKDQY----- 256
DSSP ---LEEEEEEELLLLL111111111111HHHHHHHHHHHL-----

DSSP ee11hHHHHhhhhhhhh11111111111HHHHHHH-----hhhhh
Query pcxtiPWQIaqklhavtavleekandraHDLVDLQ-----llegl 217
ident
Sbjct ---yCGVL-----yftgSDIFAKNmrahalekgftineytirplgtg 296
DSSP ---hhHHH-----hhhlHHHHHHHHHHhhhh11ee1111ee11111

DSSP 11hHHHHhhHHHHhhhhhh11111111111hhhhhhhh11111111111hhhhhh
Query 1ldADLXptRSACIaifearaqhpWPPRVatlpwplyagalegldhlelartvdaaaq 277
ident
Sbjct vagEPLP--VDSEK-----difDYIQW----- 316
DSSP 11111111--LLLH-----hhHHLLL-----

DSSP hhhhhhhhhhh1111
Query avqrfvaridratkr 292
ident
Sbjct ----kyrepkdrse 326
DSSP ----1111hh111
```

No 300: Query=mol1A Sbjct=4rq2A Z-score=6.5

[back to top](#)

```
DSSP -----
Query ----- 0
ident
Sbjct etlnggitdmltelanfeknvsqaihkynayrkaasviakypkiksgaeakklpgvgtk 60
DSSP 1111hhhhhhhhhhhhhhhhhh1111hhhhhhhhhhhhhhhh1111111hhhhhh11111hh

DSSP -----111111111h
Query -----aapyspntlr 11
ident
```



```

Query  gxpVKPRRFTAKLSYR--GRAFATVPIEVSSV-EAGNadqfdtlttsdalglvgvpaavav 176
ident  |                               |
Sbjct  --gETKFMGVCQLPSKndEKEYPHRRIDIRLIpKDQY----- 256
DSSP   --1LEEEEEELLLL11LLLLLLEEEEEEL1HHHH-----

DSSP   ee11hHHHHHHhhhhhh111111111111HHHH-----hhhhhhh
Query  pcxtiPWQIAqk1havtavleepkandraHDLV-----dlq1legl 217
ident  |                               |
Sbjct  ----YCGVLY-----ftgSDIFnknmrahalekgftineytirplgvtg 296
DSSP   ----HHHHH-----hh1LHHHHhhhhhhhhhhleeel1111111111

DSSP   11hHHHHHHhhHHHHhhhhhh1111LLLLL11111hhhhhhhh1111111111hhhhhh
Query  1ldADLXPtrSACIaifearaqhPWPPRVatlphwpliyagalegldhlelartvdaaaq 277
ident  |                               |
Sbjct  vagEPLPV--DSEK-----difDYIQWKY----- 318
DSSP   111LLLLL--LLHH----hhhhHLLLLL-----

DSSP   hhhhhhhhh1111
Query  avqrfvaridratkr 292
ident
Sbjct  -----repkdrse 326
DSSP   -----11hhhh11

```

No 302: Query=mol1A Sbjct=3mbyA Z-score=6.5

[back to top](#)

```

DSSP -----
Query ----- 0
ident
Sbjct  tlngitdmltelanfeknvsqaihknayrkaasviakypkiksgaeakklpgvgtki 60
DSSP   111hhhhhhhhhhhhhh1111hhhhhhhhhhhhhh11111111hhhh111111hh

DSSP -----111111111hh
Query -----aapyspptnlr 12
ident
Sbjct  aekideflatgklrklekirqddtssinfltrvsgigpsaarkfvddegiktledlrkne 120
DSSP   hhhhhhhhh111hhhhhhhh1hhhhhhhh1111111hhhhhhhh1111hhhhhh1h

DSSP   hhhhhhhhh1111hhhhHHHHHHHHHHHH--LLLL11LLLLEEEEHHHHHHhh11
Query  slrdrltqvaerqgvfgrlqRHVAXIVVAQFAA-TLTDdtGAPLLLVKGSSELELrgi 71
ident  | |
Sbjct  dklnhhqriglkyfgdfekriPREEMLMQDIVLnEVKkvdSEYIATVCGSFRGA---- 176
DSSP   hh11hhhhhh111hh11eHHHHHHHHHHHHHHHH11LLEEEELHHHHLL----

DSSP   1111LLLLEEEEEL-----1LHHHHHHHHHHHHhh1111eEEELLEEL111
Query  pdsrTSKDFATVAR-----rDIELIHEQLADAGetgwegftAIFTAPEElaap 119
ident  | | | |
Sbjct  ---eSSGDMDVLLThpsftsestqpkLLHQVVEQLQKVH-----FITDTLSKG--- 222
DSSP   ---1EELLEEEEE111111111111HHHHHHHHHHLL-----LEEEEEEL---

DSSP   1111LLEEEEEEL--LEEEEEEEEEEL--LLLL1111eeee1hhhh1111111111
Query  gxpVKPRRFTAKLSYR--GRAFATVPIEVSSV-EAGNadqfdtlttsdalglvgvpaavav 176
ident  |                               |
Sbjct  ---ETKFMGVCQLPSKndEKEYPHRRIDIRLIpKDQY----- 256
DSSP   --LLEEEEEELLLL11LLLLLLEEEEEEL1HHHH-----

DSSP   ee11hHHHHHHhhhhhh111111111111HHHHHH-----hhhhh
Query  pcxtiPWQIAqk1havtavleepkandraHDLVDLQ-----llegl 217
ident  |                               |
Sbjct  ----yCGVL-----yftgSDIFNKNmrahalekgftineytirplgvtg 296
DSSP   ----HHHHH-----hh1LHHHHHHhhhhhh11leeel1111111111

DSSP   11hHHHHHHhhHHHHhhhhhh1111LLLLL11111hhhhhhhh1111111111hhhhhh
Query  1ldADLXptRSACIaifearaqhPWPPRVatlphwpliyagalegldhlelartvdaaaq 277
ident  |                               |
Sbjct  vagEPLP--VDSEK-----difDYIQW----- 316

```

DSSP hhhhhhhhhhhh1111  
Query avqrfvaridratkr 292  
ident  
Sbjct -----kyrepkdrse 326  
DSSP -----1111hhhh111

No 303: Query=moll1A Sbjct=3jprA Z-score=6.5

[back to top](#)

DSSP -----  
Query ----- 0  
ident  
Sbjct tlnggitdmltelanfekonvsqaihknayrkaasviakypkhiksgaeakklpgvgtki 60  
DSSP 111hhhhhhhhhhhhhhhh1111hhhhhhhhhhhhhhhh111111hhhh111111hhhh

DSSP -----111111111hh  
Query -----aapyssptnlr 12  
ident  
Sbjct aekideflatgklrklekirqddtssinfltrvsgigpsaarkfvdegiktleldrkn 120  
DSSP hhhhhhhhhhh111hhhhhh111hhhhhhhhhh111111hhhhhhhhhh111111hhhhhhhh

DSSP hhhhhhhhhhhh1111hhhhHHHHHHHHHHHHHH-LLLL11LLLEEEHHHHHHHHhh1  
Query slrdrltqvaerqgvvfgrrlqRHVAXIVVAQFAA-TLTDdtGAPLLLKGGSSLELrgi 71  
ident  
Sbjct dklnhhqriglkyfgdfekriPREEMLQMqDIVLnEVKkvDSEYIATVCGSFRRGA---- 176  
DSSP hh11hhhhhhhh111hhhl1eHHHHHHHHHHHHHHHHHH1LLEEEELHHHHL-----

DSSP 1111LLLEEEEL-----1LHHHHHHHHHHHHhh1111eEEELLEEL111  
Query pdsrTSKDFATVAR-----rDIELIHEQLADAGetgwegftAIFTAPEEaap 119  
ident | | || |  
Sbjct ---eSSGDMVLLThpsftsestqkqkLLHQVVEQLQKVH-----FITDTLSKG--- 222  
DSSP ---1EELLEEEL111eell1eell111HHHHHHHHHHHL------LEEEEL---

DSSP 1111LEEEEEEEL--LEEEEEEEL-LLLL1111eellhhhh11111ee  
Query gxpVKPRRFTAKLSYR--GRA FATVPIEVSSV-EAGNadqfdtltsdalglvgvpaav 176  
ident | | |  
Sbjct ---ETKFMGVCQLPSKndEKEYPHRRIDIRLIpKDQY----- 256  
DSSP ---LEEEEEEELLLL111LLLEEEEEEEL1HHHH-----

DSSP eellHHHHhhhhhhhh1111111111HHHHHHH-----hhhhh  
Query pcxtiPWQIaqlhavtavleepkandraHDLVdLQ-----llegl 217  
ident |  
Sbjct ---yCGVL-----yftgSDIFNKNmrahaalekgftineytriplgvtg 296  
DSSP ---hhhhh-----hhhlLHHHHHHhhhhhh11eell111ee1111

DSSP 11hHHHHhhHHHHhhhhhh1111LLLLL1111hhhhhhhh1111111111hhhhhh  
Query 1ldADLXptRSACIaifearaqpWPPRVatlpwpliyagalegldhlelartvdaaaq 277  
ident |  
Sbjct vagEPLP--VDSEK-----difDYIQW----- 316  
DSSP 1111LLL-LLLH-----hhHHL------

DSSP hhhhhhhhhhhh1111  
Query avqrfvaridratkr 292  
ident  
Sbjct -----kyrepkdrse 326  
DSSP -----1111hhhh111

No 304: Query=moll1A Sbjct=3rjfA Z-score=6.5

[back to top](#)

DSSP -----  
Query ----- 0

|       |                                                              |     |
|-------|--------------------------------------------------------------|-----|
| Sbjct | tInggitdmltelanfeknvsqaihkynayrkaasviakyphkiksgaeakklpgvgtki | 60  |
| DSSP  | 111hhhhhhhhhhhhhhhh111hhhhhhhhhhhhhh1111111hhhhh11111hhh     |     |
| DSSP  | -----11111111hh                                              |     |
| Query | -----aapyspptnlr                                             | 12  |
| ident |                                                              |     |
| Sbjct | aekideflatgklrklekirqddtssinfltrvsgigpsaarkfvdegiktledlrkne  | 120 |
| DSSP  | hhhhhhhhhh111hhhhhhhh1hhhhhhhh1111111hhhhhhhh1111hhhhh1lh    |     |
| DSSP  | hhhhhhhhhh1111hhhhHHHHHHHHHHHH-LLLL11LLLLEEEHHHHHHhh11       |     |
| Query | sldrsltqvaerqgvfgrlqRHVAXIVVAQFAA-TLTDdtGAPLLLVKGGSSLELrrgi  | 71  |
| ident |                                                              |     |
| Sbjct | dklnhhqriglkyfgdfekriPREEMLMQDIVLnEVKKvdSEYIATVCGSFRRGA----  | 176 |
| DSSP  | hh11hhhhhhhh1hhhh111eEHHHHHHHHHHHHHHHHHH1LLEEELHHHHLLL----   |     |
| DSSP  | 1111LLLLEEEEL-----1LHHHHHHHHHHHHhh1111eeEEELLEEL111          |     |
| Query | pdsrTSKDFATVAR-----rDIELIHEQLADAGetgwefTAIFTAPEEiaap         | 119 |
| ident |                                                              |     |
| Sbjct | ---eSSGDMVLLThpsftsestkqpkLLHQVVEQLQKVH-----FITDTLSKG---     | 222 |
| DSSP  | ---1EELLEEEEL111ee1111HHHHHHHHHHLL-----LEEEEL---             |     |
| DSSP  | 111LLLLEEEEEEEL--LEEEEEEEL-LLLL1111eeee1hhhh11111lee         |     |
| Query | gxpVKKRRFTAKLSYR--GRAFATVPIEVSSV-EAGNadqfdt1tsdalglvgvpaavav | 176 |
| ident |                                                              |     |
| Sbjct | ---ETKFMGVCQLPSKndEKEYPHRRIDIRLIpKDQY-----                   | 256 |
| DSSP  | ---LLEEELLLLL11LLLLEEEEEEEL1HHHH-----                        |     |
| DSSP  | ee11HHHHhhhhhhhh1111111111HHHHHH-----hhhhh                   |     |
| Query | pcxtiPWQIaqk1havtavleepkandraHDLVDLQ-----llegl               | 217 |
| ident |                                                              |     |
| Sbjct | ----yCGVL-----yftgSDIFKNmrahaiekgtineytirplvgtg              | 296 |
| DSSP  | ----hHHHH-----hhh1LHHHHHHhhhhhh11ee1111ee11111               |     |
| DSSP  | 11hHHHHhhHHHHhhhhhh1111LLL11111hhhhhhhh111111111hhhhh        |     |
| Query | 11dADLXPTrSACIaifearaqhPWPPRVat1phwpliyagalegldhlelartvdaaaq | 277 |
| ident |                                                              |     |
| Sbjct | vagEPLPV--DSEK-----difdYIQWKY-----                           | 318 |
| DSSP  | 111LLL--LLHH-----hhhhL11111-----                             |     |
| DSSP  | hhhhhhhhhh1111                                               |     |
| Query | avqrfvaridratkr                                              | 292 |
| ident |                                                              |     |
| Sbjct | -----repkdrse                                                | 326 |
| DSSP  | -----11hh111                                                 |     |

No 305: Query=mol1A Sbjct=3jpnA Z-score=6.5

[back to top](#)

|       |                                                              |     |
|-------|--------------------------------------------------------------|-----|
| DSSP  | -----                                                        |     |
| Query | -----                                                        | 0   |
| ident |                                                              |     |
| Sbjct | tInggitdmltelanfeknvsqaihkynayrkaasviakyphkiksgaeakklpgvgtki | 60  |
| DSSP  | 111hhhhhhhhhhhhhhhh111hhhhhhhhhhhhhh1111111hhhhh11111hhh     |     |
| DSSP  | -----11111111hh                                              |     |
| Query | -----aapyspptnlr                                             | 12  |
| ident |                                                              |     |
| Sbjct | aekideflatgklrklekirqddtssinfltrvsgigpsaarkfvdegiktledlrkne  | 120 |
| DSSP  | hhhhhhhhhh111hhhhhhhh1hhhhhhhh1111111hhhhhhhh1111hhhhh1lh    |     |
| DSSP  | hhhhhhhhhh1111hhhhHHHHHHHHHHHH-LLLL11LLLLEEEHHHHHHhh11       |     |
| Query | sldrsltqvaerqgvfgrlqRHVAXIVVAQFAA-TLTDdtGAPLLLVKGGSSLELrrgi  | 71  |
| ident |                                                              |     |
| Sbjct | dklnhhqriglkyfgdfekriPREEMLMQDIVLnEVKKvdSEYIATVCGSFRRGA----  | 176 |
| DSSP  | hh11hhhhhhhh1hhhh111eEHHHHHHHHHHHHHHHHHH1LLEEELHHHHLLL----   |     |



```

DSSP 1111LLLLLEEEEL-----1LHHHHHHHHHHHHhh1111eeEEELLEEL111
Query pdsrTSKDFATVAR-----rDIELIHEQLADAGetgwegftAIFTAPEE|aap 119
ident | | | | |
Sbjct ---eSSGDMVDLLThpsftsestkqpkLLHQVVEQLQKVH-----FITD|TL|SKG--- 222
DSSP ---1EELLEEEEEE111111111111HHHHHHHHHHLLL-----LEEEEEEEL---

DSSP 1111LLLLLEEEEEEEL--LEEEEEEELLLL1111eeeee|hhhh|1111leee
Query gxpVKPRRFTAKLSYR--GRAFATVPIEVSSV-EAGNadqf|dt|tsdalglv|gvpaavav 176
ident | | | | |
Sbjct ---ETKFMGVCQLPSKndEKEYPHRRIDIRL|p|KDQY----- 256
DSSP ---LLEEEEEE111111111111LEEEEEEEL1HHHH-----

DSSP ee11HHHHhhhhhhhh111111111111HHHHHHH-----hhhhh
Query pcxtiPWQ|a|qklhavtavleepkandraHDLV|DL|Q-----llegl 217
ident | | |
Sbjct ----yCGVL-----yftgSDIFNKNmrahalek|gft|ineytir|plgvtg 296
DSSP ----hHHHH-----hhlLHHHHHHHHHHhh1lee|111|lee1111111

DSSP 11hHHHHhhHHHHhhhhhh1111LLL1111hhhhhhhh1111111111hhhhh
Query 1ldADLXptRSAC|a|ifearaqhpWPPRVatlphwpliyagale|gldh|leartvdaaaq 277
ident | | | | |
Sbjct vagEPLP--VDSEK-----d|ifDYIQW----- 316
DSSP 111LLL--LLHH-----h|hhHLLL-----

DSSP hhhhhhhhh1111
Query avqrfvaridratkr 292
ident
Sbjct ----kyrepkdrse 326
DSSP ----1111hh111

```

No 306: Query=mol1A Sbjct=4do9A Z-score=6.5

[back to top](#)

```

DSSP -----
Query ----- 0
ident
Sbjct tlnggitdmltelanfeknvsqaihkynayrkaasviakyphkiksgaeakk|lpgv|gtki 60
DSSP 111hhhhhhhhhhhhhh111hhhhhhhhhhhhhh111111hhhh111111hh

DSSP -----111111111hh
Query -----aapys|s|p|tnlr 12
ident
Sbjct aekideflatgk|l|rk|lekirqdt|ss|infltrv|s|g|ipsaarkfvdegikt|led|lrkne 120
DSSP hhhhhhhhh111hhhhhhhh1hhhhhhhh111111hhhhhhhh1111hhhhhh1h

DSSP hhhhhhhhh111hhhhHHHHHHHHHHHLLL1111LEEEEH|HHHHHHhh|1
Query slrdrlt|qvaerqgvfgrlqRHVAXIVVAQFAA-TLTDdtGAPLLLVKGS|SLE|Lrrgi 71
ident | | |
Sbjct dklnhhqriglkyfgdfekriPREEM|L|QM|Q|DIVL|nEVK|vdSEY|IATV|CGS|FR|RG|A---- 176
DSSP hh11hhhhhh111hh11eEH|HHHHHHHHHHHH|111111LEEEEL|HHH|LLL----

DSSP 1111LLLLLEEEEL-----1LHHHHHHHHHHHHhh1111eeEEELLEEL111
Query pdsrTSKDFATVAR-----rDIELIHEQLADAGetgwegftAIFTAPEE|aap 119
ident | | | | |
Sbjct ---eSSGDMVDLLThpsftsestkqpkLLHQVVEQLQKVH-----FITD|TL|SKG--- 222
DSSP ---1EELLEEEEEE111111111111HHHHHHHHHHLLL-----LEEEEEEEL---

DSSP 1111LLLLLEEEEEEEL--LEEEEEEELLLL1111eeeee|hhhh|1111leee
Query gxpVKPRRFTAKLSYR--GRAFATVPIEVSSV-EAGNadqf|dt|tsdalglv|gvpaavav 176
ident | | | | |
Sbjct ---ETKFMGVCQLPSKndEKEYPHRRIDIRL|p|KDQY----- 256
DSSP ---LLEEEEEE111111111111LEEEEEEEL1HHHH-----

DSSP ee11HHHHhhhhhhhh111111111111HHHHHHH-----hhhhh
Query pcxtiPWQ|a|qklhavtavleepkandraHDLV|DL|Q-----llegl 217
ident | | |

```

```

DSSP  ---hHHHH-----hhlLHHHHHHhhhhhhllleeellllleeelllll
Query  1lhHHHHhhHHHHhhhhhh1111LLLLL1111hhhhhhhh1111111111hhhhhh 277
ident  |
Sbjct  vagEPLP--VDSEK-----difDYIQW----- 316
DSSP  111LLL--LLLH-----hhHLLL-----

DSSP  hhhhhhhhh1111
Query  avqrfvaridratkr 292
ident  |
Sbjct  ----kyrepkdrse 326
DSSP  ----1111hh111

```

No 307: Query=mol1A Sbjct=3jpoA Z-score=6.5

[back to top](#)

```

DSSP  -----
Query  ----- 0
ident  |
Sbjct  tlnggitdmltelanfeknvsqaihkynayrkaasviakyphkiksgaeakklpgvgtki 60
DSSP  111hhhhhhhhhhhhhh111hhhhhhhhhhhhhh111111hhhh11111hh

DSSP  -----11111111hh
Query  -----aapyspptnlr 12
ident  |
Sbjct  aekideflatgklrklekirqdtssinfltrvsgigpsaarkfvddegiktledlrkne 120
DSSP  hhhhhhhhh111hhhhhhhh1hhhhhhhh111111hhhhhhhh1111hhhh11h

DSSP  hhhhhhhhh1111hhhhHHHHHHHHHHHH-LLLL111LLLEEEHHHHHHhh11
Query  slrdrltqvaerqgvfgrlqRHVAXIVVAQFAA-TLTDdtGAPLLLKGGSSLELrgi 71
ident  | |
Sbjct  dklnhhqriglkyfgdfekriPREEMLMQDIVLnEVKKvdSEYIATVCGSFRRGA---- 176
DSSP  hhl1hhhhhhhh1hhhh11eEHHHHHHHHHHHHHHHH1LLEEEELHHHHLL-----

DSSP  1111LLLEEEEL-----1LHHHHHHHHHHHHhh1111eeEELLEEL111
Query  pdsrTSKDFATVAR-----rDIELIHEQLADAGetgwegftAIFTAPEElaap 119
ident  | | | |
Sbjct  ---eSSGDMDVLLThpsftsestkpqkLLHQVVEQLQKVH-----FITDTLSKG--- 222
DSSP  ---1EELLEEEEEE1111111111HHHHHHHHHHLL-----LEEEEEEEL---

DSSP  111LLLEEEEEEEL--LEEEEEEEL-LLLL1111eeeee1hhhh11111lee
Query  gxpVKPRRFTAKLSYR--GRAFATVPIEVSSV-EAGNadqfdtltaldglvgpaavav 176
ident  | |
Sbjct  ---ETKFMGVCQLPSKndEKEYPHRRIDIRLlpKDQY----- 256
DSSP  ---LEEEEEEELLLL1111111111HHHHHHHHHH-----

DSSP  eellhHHHHhhhhhh1111111111HHHHHH-----hhhhh
Query  pcxtiPWQIaqklhavtavleepkandraHDLVDLQ-----llegl 217
ident  |
Sbjct  ---yCGVL-----yftgSDIFNKNmrahalekgftineytirplgvtg 296
DSSP  ---hHHHH-----hhlLHHHHHHhhhhhhllleeellllleeelllll

DSSP  1lhHHHHhhHHHHhhhhhh1111LLLLL1111hhhhhhhh1111111111hhhhhh 277
Query  1ldADLXptRSACIaifearaqhpWPPRVatlpwplyagaleglhdhlelartvdaaaq
ident  |
Sbjct  vagEPLP--VDSEK-----difDYIQW----- 316
DSSP  111LLL--LLLH-----hhHLLL-----

DSSP  hhhhhhhhh1111
Query  avqrfvaridratkr 292
ident  |
Sbjct  ----kyrepkdrse 326
DSSP  ----1111hh111

```





DSSP EEELLLL--LLLLLEEEEEELHHH-----hhHHHH--  
 DSSP hhhhhh111111111111HHHHHHH-----hhhhh1hHH  
 Query klhavtavleepkandraHDLVDLQ-----lleg11ldAD 222  
 ident  
 Sbjct -----yftgSAHFNRSmralaktkgmslsehalstavrnthgckvpgpRV 300  
 DSSP -----hhh1LHHHHHHhhhhhh11lee111lee11ee1111lee11EE

DSSP HHhhHHHHHHhhhhhh1111LLLLL1111hhhhhhhh111111111111hhhhhhhhhh  
 Query LXptRSACIaifearaqhpWPPRVat1phwpliayaglegldhlelartvdaaaqavqrf 282  
 ident |  
 Sbjct LP--TPTEK-----dvfRLLGL----- 315  
 DSSP EL--LLLHH-----hhHHLLL-----

DSSP hhhhhh1111  
 Query varidratkr 292  
 ident  
 Sbjct pyrepaerdw 325  
 DSSP 1111hhhh111

No 311: Query=mol1A Sbjct=3uq0A Z-score=6.5

[back to top](#)

DSSP -----  
 Query ----- 0  
 ident  
 Sbjct nhn1hiteklevlakaysvqgdkwralgyakainalksfhkpvtsyqeacsipgigkrma 60  
 DSSP 111hhhhhhhhhhhhhh111hhhhhhhhhhhh111111111111hhhhhh1111hhhh

DSSP -----1111111111hhhhhh  
 Query -----aapyspntlrslrd 16  
 ident  
 Sbjct ekiieilesghlrkldhisesvpvlelfsnwigagtktaqmwyqqgfrsleldirsqaslt 120  
 DSSP hhhhhhhhh111hhhh11111hhhhhhhh111111hhhhhhhh11111hhhhhhhh1111

DSSP hhhhhhh1111hhhhHHHHHHHHHHHHH-LLLL11LLLLEEEEHHHHHHHHhh11111  
 Query rltqvaerqgvfgrlQRHVAXIVVAQFAA-TLTDdtGAPLLLVKGGSSLELrrgipdsr 75  
 ident | | | | |  
 Sbjct tqqaiglkhysdflerMPREEATEIEQTVQkAAQafnSGLLCVACGSYRRGK-----a 173  
 DSSP hhhhhhh11hhhh11EEHHHHHHHHHHHHHHHLL11LLLLEEELHHHHLLL-----1

DSSP LLLLLEEEL-----1LHHHHHHHHHHHHhh1111eeEEELLEEL111111LLEE  
 Query TSKDFATVAR-----rDIELIHEQLADAGetgwegftAIFTAPEEJaapgxPKPRR 127  
 ident | | | | |  
 Sbjct TCGDVDVLITHpdgrshrgrIFSRLLDLSLRQEG-----FLTDDLKVG-----ETKYL 219  
 DSSP EELLEEEEEE1111111111HHHHHHHHHHHLL-----LEEEEEEEL-----LLEE

DSSP EEEEEEE11EEEEEEEEEEELLLLL111eeeee1hhhh111111eeeee1hHHHHhh  
 Query FTAKLSYrgRAFATVPIEVSSVEAGNAdqfdt1tsdalglvgvpaavavpextiPWQIaq 187  
 ident | | | | |  
 Sbjct GVCRLPG--PGRRRRRLDIIIVPYSEF-----aCALL-- 249  
 DSSP EEELLLL--LLLLLEEEEEELHHHH-----hhHHH--

DSSP hhhhhh111111111111HHHHHHH-----hhhhh1hHHHHhhHHHHHh  
 Query klhavtavleepkandraHDLVDLQ-----lleg11ldADLXptRSACIa 232  
 ident |  
 Sbjct -----yftgSAHFNRSmralaktkgmslsehalstavpgRVLP--TPTEK- 292  
 DSSP -----hhh1LHHHHHHhhhhhh11lee111lee1111LLL--LLLH--

DSSP hhhhh1111LLLLL11111hhhhhhhh111111111111hhhhhhhhhhhhhhhh1111  
 Query ifearaqhpWPPRVat1phwpliayaglegldhlelartvdaaaqavqrfvaridratkr 292  
 ident  
 Sbjct -----dvfRLLGL-----pyrepaerdw 310  
 DSSP -----hhHHLLL-----1111hhhh11

[back to top](#)

```
DSSP -----  
Query ----- 0  
ident  
Sbjct tnhnlhiteklevlakaysvqgdkwralgyakainalksfhkpvtisyqeacsipgigkrm 60  
DSSP 1111hhhhhhhhhhhhhhhh111hhhhhhhhhhhhhhhh111111hhhhhh1111hhhh
```

```
DSSP -----111111111hhhhh  
Query -----aapyspptnlrslr 15  
ident  
Sbjct aekieielesghlrkldhisesvpvlelfsniwgagtktaqmwyqgfrsleldirsqasl 120  
DSSP hhhhhhhhh111hh11111hhhhhhhh111111hhhhhhhhhh1111hhhhhh1111
```

```
DSSP hhhhhhhhh1111hHHHHHHHHHHHHHHHHHLL--LLL11LLEEEHHHHHHHHhh1111  
Query drltqvaerqgvfGRLQRHVAXIVVAQFAATL--TDDTgAPLLLKGGSSLELrgipd 73  
ident  
Sbjct ttqqaiglkhsydfLERMPREEATEIEQTVQKAaqAFNS-GLLCVACGSYRRGK----- 173  
DSSP 1hhhhhhhh111hhHLEEEHHHHHHHHHHHHHHhhLLLL-LLEEEELHHHHLLL-----
```

```
DSSP 11LLEEEEL-----1LHHHHHHHHHHHHhh1111eeEEELLEEL11111LLL  
Query srTSKDFATVAR-----rDIELIHEQLADAGetgwegftAIFTAPEEiaapgxPKVP 125  
ident  
Sbjct -aTCGDVDVLIthpdgrshrgIFSRLDLSLRQEG-----FLTDDLKVG-----ETK 218  
DSSP -1EELLEEEEL11111111LHHHHHHHHHHHLL-----LEEEEL-----LLE
```

```
DSSP EEEEEEE11EEEEEEEEEEELLLL1111eeeee1hhhh11111eeeee1hHHHH  
Query RRFTAKLSYrgRAFATVPIEVSSVEAGNadqfdtltsdalglvgvpaavavpctiPWQI 185  
ident  
Sbjct YLGVCRLLPG--PGRRHRLDIIVVPYSE-----faCALL 250  
DSSP EEEEELLL--LLLLLEEEELHHH-----hhHHHH
```

```
DSSP hhhhhhh1111111111HHHHHHH-----hhhh1h  
Query aqklhavtavlepkandraHDLVDLQL-----leg11ld 220  
ident  
Sbjct -----yftgSAHFNRSMralaktgmslsehalstavvrnthgckvgpg 294  
DSSP -----hhhlLHHHHHHHHhhhhhh1lee111lee1111111111111111
```

```
DSSP HHHHhhHHHHhhhhhh1111LLLLL11111hhhhhhhh1111111111hhhhhhhh  
Query ADLXptrSACIaifearaqhpWPPRVatlphwpliyagalegldhlelartvdaaaqavq 280  
ident  
Sbjct RVLTP--TPTEK-----dvfRLLGL----- 311  
DSSP LEEL--LLLHH-----hhHLLL-----
```

```
DSSP hhhhhhh1111  
Query rfvaridratkr 292  
ident  
Sbjct --pyrepaerdw 321  
DSSP --1111hhhh111
```

No 313: Query=mol1A Sbjct=2ispA Z-score=6.5

[back to top](#)

```
DSSP -----  
Query ----- 0  
ident  
Sbjct tlnggitdmltelanfeknvsqaihkynayrkaasviakyphkiksgaeakklpgvgtki 60  
DSSP 111hhhhhhhhhhhhhhhh1111hhhhhhhhhhhhhhhh111111hhhhhh1111hhhh
```

```
DSSP -----111111111hh  
Query -----aapyspptnlr 12  
ident  
Sbjct aekideflatgklrklekirqddtssinfltrvsgigpsaarkfvdegiktledlrkne 120  
DSSP hhhhhhhhh111hhhhhhhh1hhhhhhhhhh111111hhhhhhhh1111hhhhhh11h
```

DSSP hhhhhhhhhhh1111hhhhHHHHHHHHHHHHH-LLLL11LLLLLEEEHHHHHHhh11  
Query slrdrltqvaerqgvfgrlqRHVAXIVVAQFAA-TLTDdtGAPLLLKGGSSLELrrgi 71  
ident | |  
Sbjct dklnhhqrigrkyfgdfekriPREEMLQMqDIVLnEVKKvdSEYIATVCGSFRRGA---- 176  
DSSP hhl1hhhhhhhh111hhhl1eEHHHHHHHHHHHHhHHHHh11LLEEEELHHHHLLL----

DSSP 1111LLLLLEEEEL-----1LHHHHHHHHHHHHhh111leeEEELLEEL111  
Query pdsrTSKDFATVAR-----rDIELIHEQLADAGetgwegftAIFTAPEEiaap 119  
ident | | | |  
Sbjct ---eSSGMDVLLThpsftsestkpqkLLHQVVEQLQKVH-----FITDTLSKG--- 222  
DSSP ---1EELLEEEEEE11lee11e1111HHHHHHHHHHHLL-----LEEEEEEEL---

DSSP 1111LEEEEEEEL--LEEEEEEEL-LLLL1111eeee1hhhh1111lee  
Query gxpVKPRRFTAKLSYR--GRAFATVPIEVSSV-EAGNadqfdtlttsdalglvgpaavav 176  
ident | |  
Sbjct ---ETKFMGVCQLPSKndEKEYPHRRIDIRLIpKDQY----- 256  
DSSP ---LEEEEEEELLLL11LLLLLEEEEEEEL1HHHH-----

DSSP eel1hHHHHhhhhhh1111111111HHHHHHH-----hhhhh  
Query pcxtiPWQIaqkIhavtavleepkandraHDLVDLQ-----llegl 217  
ident |  
Sbjct ----yCGVL-----yftgSDIFNKNmrahalekgftineytirplgvtg 296  
DSSP ----hHHHH-----hhl1LHHHHHHhhhhhhhhlee1111ee1111

DSSP 11hHHHHhhHHHHhhhhhh1111LLLLL1111hhhhhhhh11111111hhhhhh  
Query 1ldADLXptRSACIaifearaqhpWPPRVatlpwpliyagalegldhlelartvdaaaq 277  
ident |  
Sbjct vagEPLP--VDSEK-----difDYIQW----- 316  
DSSP 111LLL--LLLH-----hhHLLL-----

DSSP hhhhhhhhh1111  
Query avqrfvaridratkr 292  
ident  
Sbjct ----kyrepkdrse 326  
DSSP ----1111hh111

No 314: Query=mol1A Sbjct=7icgA Z-score=6.5

[back to top](#)

DSSP -----  
Query ----- 0  
ident  
Sbjct etlnggitdmltelanfeknvsqaihkynayrkaasviakyphkiksgaeakklpgvgtk 60  
DSSP 1111hhhhhhhhhhhhhhhh111hhhhhhhhhhhhhhhh111111hhhh11111hh

DSSP -----111111111h  
Query -----aapyspntl 11  
ident  
Sbjct iaekideflatgklrklekirqddtssinflttrvsgigpsaarkfvdegiktledlrkn 120  
DSSP hhhhhhhhh1111hhhhhhhhhhhhhhhh111111hhhhhhhh11111hhhhhh1

DSSP hhhhhhhhhhh1111hhhhHHHHHHHHHHHHH-LLLLLLLLLLEEEHHHHHHhh1  
Query rslrdrltqvaerqgvfgrlqRHVAXIVVAQFAA-TLTDdtGAPLLLKGGSSLELrrg 70  
ident | |  
Sbjct edklnhhqrigrkyfgdfekriPREEMLQMqDIVLnEVKKVDSEYIATVCGSFRRGA--- 177  
DSSP hhl1hhhhhhhh11hhhh11eEHHHHHHHHHHHHhHHHHLLLLEEEELHHHHLLL---

DSSP 1111LLLLLEEEEL-----1LHHHHHHHHHHHHhh111leeEEELLEEL11  
Query ipdsrTSKDFATVAR-----rDIELIHEQLADAGetgwegftAIFTAPEEiaa 118  
ident | | | |  
Sbjct ---eSSGMDVLLThpsftsestkpqkLLHQVVEQLQKVH-----FITDTLSKG-- 223  
DSSP ---1EELLEEEEEE1111111111hHHHHHHHHHHHLL-----LEEEEEEEL---

DSSP 1111LLLLLEEEEEEEL--EEEEEEEEEEEL-LLLL1111eeee1hhhh1111lee  
Query pgxpVKPRRFTAKLSYRG--RAFATVPIEVSSV-EAGNadqfdtlttsdalglvgpaava 175  
ident | |

DSSP ----LLEEEEEELLLLLL11LLLLLEEEEEEEeHHHH-----  
DSSP eeellhHHHHhHHHHhh1111111111hHHHHHH-----  
Query vpcxtiPWQIaqlhavlaveepkandrahdlvDLQLE----- 215  
ident  
Sbjct -----yCGVL-----yftgSDIFNknmrahalekgftineytirp 292  
DSSP -----hHHHH-----hhl1LHHHHHHHHHHhh1leeeelleee

DSSP -hh1hHHHHHHHHHHHHhh1111LLLLL1111hHHHHHHHH1111111111hhh  
Query -gl1ldadlxptRSACIAifearaqhpWPPRVat1phwpliyagalegldhlelartvda 274  
ident  
Sbjct lgvtgvageplpVDSEK-----ifdYIQW----- 318  
DSSP 111111111111LHLLH-----hhl1LHLL-----

DSSP hHHHHHHHHHHHH1111  
Query aaqavqrfvaridratkr 292  
ident  
Sbjct -----yrepkdrse 327  
DSSP -----111hHH11

No 315: Query=mol1A Sbjct=8iclA Z-score=6.5

[back to top](#)

DSSP -----  
Query ----- 0  
ident  
Sbjct etlnggitdmltelanfknvsqaihknayrkaasviakyphkiksgaeakklpgvgtk 60  
DSSP 1111hHHHHHHHHHHhh1111hHHHHHHHHHHHH111111hHHHH111111hh

DSSP -----1111111111h  
Query -----aapyspntnl 11  
ident  
Sbjct iaekideflatgklrklekirqddtssinfltrvsgigpsaarkfvdegiktledlrkn 120  
DSSP hHHHHHHHH1111hHHHHHHHHHHHH111111hHHHHHHHH1111hHHHH1111hHHHH

DSSP hHHHHHHHHHH1111hHHHHHHHHHHHHHHHHHH-LLLLLLLEEEEEHHHHHHHHh1  
Query rslrdr1tqvaerqvgvgrlqRHVAXIVVAQFAA-TLDDTGAPLLLVKGGSSLELrrg 70  
ident  
Sbjct edklnhhqriglkyfgdfekriPREEMLMQDIVLnEVKKVDSEYIATVCGSFRRGA--- 177  
DSSP hhh1hHHHHHHHH1hHHHH1leEHHHHHHHHHHHHHHHHHHLLLEEEELHHHHLL---

DSSP 1111LLEEEEEEL-----1LHHHHHHHHHHHHhh1111eeEEELLEEL11  
Query ipdsrTSKDFATVAR-----rDIELIHEQLADAGetgwegftAIFTAPEEIIaa 118  
ident  
Sbjct ---eSSGDMDVLLThpsftsestqpkLLHQVVEQLQKVH-----FITDTLSKG-- 223  
DSSP ---LEELLEEEL1111111111hHHHHHHHHHHHLL-----LEEEEEEL---

DSSP 1111LLEEEEEEEELL--EEEEEEEEEEEL-LLLL1111eeee1hHHHH11111ee  
Query pgxpVKPRRFTAKLSYRG--RAFATVPIEVSSV-EAGNadqfdtltsdalglvgvpaava 175  
ident  
Sbjct ---ETKFMGVCQLPSKNdeKEYPHRRIDIRLIpKDQY----- 257  
DSSP ---LLEEEEEELLLLL11LHLLLEEEEEEEeLLLH-----

DSSP eeellhHHHHhHHHHhh1111111111hHHHHHHHH-----  
Query vpcxtiPWQIaqlhavlaveepkandrahdlvDLQLE----- 215  
ident  
Sbjct -----yCGVL-----yftgSDIFNknmrahalekgftineytirp 292  
DSSP -----hHHHH-----hhl1LHHHHHHHHHHhh1leeeelleee

DSSP -hh1hHHHHHHHHHHHHhh1111LLLLL1111hHHHHHHHH1111111111hhh  
Query -gl1ldadlxptRSACIAifearaqhpWPPRVat1phwpliyagalegldhlelartvda 274  
ident  
Sbjct lgvtgvageplpVDSEK-----difdYIQW----- 317  
DSSP 111111111111LHLLH-----hhl1LHLL-----



Query aaqavqrivaridratkr 292  
ident  
Sbjct -----kyrepkdrse 327  
DSSP -----1111hhh111

No 316: Query=mol1A Sbjct=1zqbA Z-score=6.5

[back to top](#)

DSSP -----  
Query ----- 0  
ident  
Sbjct etlnggitdmltelanfeknvsqaihkynayrkaasviakypkiksgaeakklpgvgtk 60  
DSSP 1111hhhhhhhhhhhhhhhh1111hhhhhhhhhhhhhhhh111111hhhhh11111hh

DSSP -----111111111h  
Query -----aapyspsptnl 11  
ident  
Sbjct iaekideflatgklrklekirqddtssinfltrvsgigpsaarkfvdegiktledlrkn 120  
DSSP hhhhhhhhh1111hhhhhhhhhhhhhhhh111111hhhhhhhhhh1111hhhhhh1

DSSP hhhhhhhhhhh1111hhhhHHHHHHHHHHHH-LLLL11LLLEEEHHHHHHhh1  
Query rslrdrltqvaerqgvfgrlqRHVAXIVVAQFAA-TLTDdtGAPLLLKGGSSLELrrg 70  
ident | |  
Sbjct edklnhhqriglkygdfekriPREEMLMQDIVLnEVKKvdSEYIATVCGSFRGA--- 177  
DSSP hhh11hhhhhhhh1hhhh1leEHhHHHHHHHHHHHHHHHH1LLEEEELLLLLL---

DSSP 1111LLLEEEEL-----1LHHHHHHHHHHHHhh1111eeEEELLEEL11  
Query ipdsrTSKDFATVAR-----rDIELIHEQLADAGetgwegftAIFTAPEEIIaa 118  
ident | | | | |  
Sbjct ---eSSGDMDVLLThpsftsestkpklLHQVVEQLQKVH-----FITDTLSKG-- 223  
DSSP ---1EELLEEEEEEe111111111hhHHHHHHHHHHLL-----LEEEEEEEL--

DSSP 1111LLLEEEEEEEL--EEEEEEEEEEEL-LLLL1111eeeee1hhhh11111ee  
Query pgxpVKPRRFTAKLSYRG--RAFATVPIEVSSV-EAGNadqfdtltsdalglvgvpaava 175  
ident | |  
Sbjct ---ETKFMGVCQLPSKNdeKEYPHRRIDIRLIpKDQY----- 257  
DSSP ---LLEEEELLLLLL11LLLEEEEEEeLLLH-----

DSSP ee11hHHHHhhhhhhhh1111111111hhhhHHHHHH-----  
Query vpcxtiPWQIaqklhavlavlepkandrahdlvDLQLE----- 215  
ident  
Sbjct ---yCGVL-----yftgSDIFNKnmrahalekgftineytirp 292  
DSSP ---hHHHH-----hh11LHHHHhhhhhhhh1leee1leeee

DSSP --hh11hhhhhhhhHHHHhhhhhh1111LLLLL1111hhhhhhhh111111111hh  
Query --g11ldadlxptrSACIaifearaqhpWPPRVatlpwplyagalegldhlelartvd 273  
ident |  
Sbjct lgvtgvageplpvdSEKD-----ifdYIQWK----- 318  
DSSP 1111111111111LHHH-----hhhLLLL-----

DSSP hhhhhhhhhhhhh1111  
Query aaqavqrfvaridratkr 292  
ident  
Sbjct -----yrepkdrse 327  
DSSP -----111hhh111

No 317: Query=mol1A Sbjct=7icnA Z-score=6.5

[back to top](#)

DSSP -----  
Query ----- 0  
ident  
Sbjct etlnggitdmltelanfeknvsqaihkynayrkaasviakypkiksgaeakklpgvgtk 60  
DSSP 1111hhhhhhhhhhhhhhhh1111hhhhhhhhhhhhhhhh111111hhhhh11111hh

```

DSSP -----111111111h
Query -----aapyspntl 11
ident
Sbjct iaekideflatgklrklekirqddtssinfltrvsgigpsaarkfvdegiktledlrkn 120
DSSP hhhhhhhhhhh1111hhhhhhhh1111hhhhhhhhhh111111hhhhhhhh11111hhhhhhhh1

DSSP hhhhhhhhhhhhh1111hhhhhhHHHHHHHHHHHH-LLLL11LLLEEEHHHHHHHHhh1
Query rslrdrltqvaerqgvfgrlqRHVAXIVVAQFAA-TLTDdtGAPLLLKGGSSLELrrg 70
ident | |
Sbjct edklnhhqriglkyfgdfekriPREEMLQMqDIVLnEVKkVdSEYIATVCGSFRRGA--- 177
DSSP hhh11hhhhhhhh1hhhhhh1leEHHHHHHHHHHHHHHHHHh1LLEEEELLLLLLLL---

DSSP 1111LLLEEEEL-----1LHHHHHHHHHHHHhh1111eeEEELLEEL11
Query ipdsrTSKDFATVAR-----rDIELIHEQLADAGetgwegftAIFTAPEEIaa 118
ident | | | |
Sbjct ---eSSGDMDVLLThpsftsestqpkLLHQVVEQLQKVH-----FITDTLSKG-- 223
DSSP ---1EELLEEEEL1111111111hhHHHHHHHHHHLL-----LEEEEEEEL--

DSSP 1111LLLEEEEEEEL--EEEEEEEEEEEL-LLLL1111eeeee1hhhh1111lee
Query pgxpVKPRRFtAKLSYRG--RAFATVPIEVSSV-EAGNadqfdtlttsdalglvgvpaava 175
ident | |
Sbjct ---ETKFMGVCQLPSKNdeKEYPHRRIDIRLIpKDQY----- 257
DSSP ---LLEEEEEEELLLLL11LLLEEEEEEEL1HHHH-----

DSSP ee11hHHHHhhhhhhhh1111111111hhhhHHHHHH-----
Query vpcxtiPWIaqlhavlavleekandrahdlvDLQLE----- 215
ident
Sbjct ----yCGVL-----yftgSDIFNKmrahalekgftineytirp 292
DSSP ----hHHHH-----hhh1LHHHHhhhhhhhh1leee1leeee

DSSP -hh11hhhhhhhhHHHHhhhhhh1111LLLL1111hhhhhhhh1111111111hh
Query -glldadlxptRSACIaifearaqhpWPPRVatlphwpliyagalegldhlelartvda 274
ident
Sbjct lgvtagveplpVDSEK-----difDYIQW----- 317
DSSP 111111111111LLHH-----hhHHLLL-----

DSSP hhhhhhhhhhhhh1111
Query aaqavqrfvaridratkr 292
ident
Sbjct -----kyrepkdrse 327
DSSP -----1111hhhh11

```

No 318: Query=mol1A Sbjct=1zqdA Z-score=6.5

[back to top](#)

```

DSSP -----
Query ----- 0
ident
Sbjct etlnggitdmltelanfeknvsqaihkynayrkaasviakyphkiksgaeakklpgvgtk 60
DSSP 1111hhhhhhhhhhhhhhhh1111hhhhhhhhhhhhhhhh111111hhhh111111hh

DSSP -----111111111h
Query -----aapyspntl 11
ident
Sbjct iaekideflatgklrklekirqddtssinfltrvsgigpsaarkfvdegiktledlrkn 120
DSSP hhhhhhhhhhh1111hhhhhhhh1111hhhhhhhhhh111111hhhhhhhh1111hhhhhh1

DSSP hhhhhhhhhhhhh1111hhhhhhHHHHHHHHHHHH-LLLL11LLLEEEHHHHHHHHhh1
Query rslrdrltqvaerqgvfgrlqRHVAXIVVAQFAA-TLTDdtGAPLLLKGGSSLELrrg 70
ident | |
Sbjct edklnhhqriglkyfgdfekriPREEMLQMqDIVLnEVKkVdSEYIATVCGSFRRGA--- 177
DSSP hhh11hhhhhhhh1hhhhhh1leEHHHHHHHHHHHHHHHHHh1LLEEEELHHHHLLL---

DSSP 1111LLLEEEEL-----1LHHHHHHHHHHHHhh1111eeEEELLEEL11
Query ipdsrTSKDFATVAR-----rDIELIHEQLADAGetgwegftAIFTAPEEIaa 118

```

Sbjct ----eSSGDMVLLInpsftsestkqpkLLHQVVEQLQKVH-----FIDTL SKG-- 223  
DSSP ----1EELLEEEEEEEe1111111111hhHHHHHHHHHHHLL-----LEEEEEEL--

DSSP 1111LLEEEEEEEEEELL--EEEEEEEEEEEEEL-LLLL1111eeeee1hhhh1111lee  
Query pgxpVKPRRFTAKLSYRG--RAFATVPIEVSSV-EAGNadqfdt1tsdalglvgpaava 175  
ident | |  
Sbjct ---ETKFMGVCQLPSKNdeKEYPHRRIDIRLIpKDQY----- 257  
DSSP ---LLEEEEEELLLLL1111LLEEEEEEEEEeLLLH-----

DSSP ee11hHHHHhhhhhhhh11111111111hhhhHHHHHH-----  
Query vpcxtiPWQIAqklhavtavleekandrahd1vDLQLE----- 215  
ident  
Sbjct ----yCGVL-----yftgSDIFNKnmrahalekgftineytirp 292  
DSSP ----hHHHH-----hh11LHHHHhhhhhhhh1leee1leee

DSSP -hh11hhhhhhHHHHhhhhhh1111LLELL1111hhhhhhhh1111111111hh  
Query -gl1ldadl xptRSACIaifearaqhpWPPRVat1phwpliyagalegldhlelartvda 274  
ident  
Sbjct lgvtg vageplpVDSEK-----difDYIQW----- 317  
DSSP 111111111111LHLLH-----hhhHHHLL-----

DSSP hhhhhhhhhhhhh1111  
Query aaqavqrfvaridratkr 292  
ident  
Sbjct -----kyrepkdrse 327  
DSSP -----1111hh111

No 319: Query=mol1A Sbjct=7icfA Z-score=6.5

[back to top](#)

DSSP -----  
Query ----- 0  
ident  
Sbjct etlngitdmltelanfeknvsqaihkynayrkaasviakyphkiksgaeakklpgvgtk 60  
DSSP 1111hhhhhhhhhhhhhh1111hhhhhhhhhhhhhh111111hhhh111111h

DSSP -----1111111111h  
Query -----aapyspsptnl 11  
ident  
Sbjct iaekideflatgklrklekirqddtssinfltrvsgigpsaarkfvdegiktledlrkn 120  
DSSP hhhhhhhhh1111hhhhhh1111hhhhhhhh111111hhhhhhhh1111hhhhhh1

DSSP hhhhhhhhhhh1111hhhhHHHHHHHHHHHHH-LLLL11LLEEEHHHHHHhh1  
Query rslrdr1tqvaerqgvfgrlqRHVAXIVVAQFAA-TLTDdtGAPLLLKGGSSLELrrg 70  
ident | |  
Sbjct edklnhhqriglkyfgdfekriPREEMLQMQDIVLnEVKkvdSEYIATVCGSFRFGA--- 177  
DSSP hhh11hhhhhhhh11eHHHHHHHHHHHHHHHHH1LLEEEELHHHHLL---

DSSP 1111LLEEEEEEL-----1LHHHHHHHHHHHHhh1111eeEEELLLEEL11  
Query ipdsrTSKDFATVAR-----rDIELIHEQLADAGetgwegftAIFTAPEEIIaa 118  
ident | | | |  
Sbjct ----eSSGDMVLLThpsftsestkqpkLLHQVVEQLQKVH-----FITDTLSKG-- 223  
DSSP ----1EELLEEEEEEEe1111111111hHHHHHHHHHHHLL-----LEEEEEEL--

DSSP 1111LLEEEEEEEEEELL--EEEEEEEEEEEEEL-LLLL1111eeeee1hhhh1111lee  
Query pgxpVKPRRFTAKLSYRG--RAFATVPIEVSSV-EAGNadqfdt1tsdalglvgpaava 175  
ident | |  
Sbjct ---ETKFMGVCQLPSKNdeKEYPHRRIDIRLIpKDQY----- 257  
DSSP ---LLEEEEEELLLLL1111LLEEEEEEEEEeLLLH-----

DSSP ee11hHHHHhhhhhhhh11111111111hhhhHHHHHH-----  
Query vpcxtiPWQIAqklhavtavleekandrahd1vDLQLE----- 215  
ident  
Sbjct ----yCGVLYF-----tgSDIFNKnmrahalekgftineytirp 292  
DSSP ----hHHHHLL-----1LHHHHhhhhhhhh1leee111leee



```

DSSP -----
Query ----- 0
ident
Sbjct etlnggitdmltelanfeknvsqaihkynayrkaasviakyphkiksgaeakklpgvgtk 60
DSSP 1111hhhhhhhhhhhhhhhh1111hhhhhhhhhhhhhhhh111111hhhh11111hh

DSSP -----111111111hh
Query -----aapyspntnl 11
ident
Sbjct iaekideflatgklrklekirqddtssinfltrvsgigpsaarkfvdegiktledlrkn 120
DSSP hhhhhhhhh1111hhhhhhhh1hhhhhhhh111111hhhhhhhh11111hhhhhh1

DSSP hhhhhhhhhhh1111hhhhHHHHHHHHHHHHH-LLLL11LLLLEEEHHHHHHhh1
Query rslrdrltqvaerqgvfgrlqRHVAXIVVAQFAA-TLTDdtGAPLLLKGGSSLELrrg 70
ident | |
Sbjct edklnhhqriglkyfgdfekriPREEMLQMQDIVLnEVKkvdSEYIATVCGSFRFGA--- 177
DSSP hhh11hhhhhhhh1hhhhhh1eHHHHHHHHHHHHHHHHH1LLLLEEEELLLLLL---

DSSP 11111LLLLEEEEL-----1LHHHHHHHHHHHHhh1111eeEEELLLEEL11
Query ipdsrTSKDFATVAR-----rDIELIHEQLADAGetgwegftAIFTAPEEIaa 118
ident | | | |
Sbjct ---eSSGDMDVLLThpsftsestkpklLHQVVEQLQKVH-----FITDTLSKG-- 223
DSSP ----1EELLEEEEEEe1111111111hhHHHHHHHHHLL-----LEEEEEEEL--

DSSP 1111LLLLEEEEEEEL--EEEEEEEEEEEL-LLLL1111eeeee1hhhh11111ee
Query pgxpVKPRRFTAKLSYRG--RAFATVPIEVSSV-EAGNadqfdtltsdalglvgpaava 175
ident | |
Sbjct ---ETKFMGVCQLPSKNdeKEYPHRRIDIRLIpKDQY----- 257
DSSP ---LLEEEEEEELLLLL11LLLLEEEEEEeHHHH-----

DSSP eeel1hhHHHHhhhhhhhh1111111111hhhhHHHHHH-----
Query vpcxtiPWQIaqlhavtavlepkandrahdlvDLQLE----- 215
ident
Sbjct -----yCGVL-----yftgSDIFNKmrahalekgftineytirp 292
DSSP -----hHHHH-----hhh1LHHHHHHhhhhhhhh11111111111

DSSP --hh11hhhhhhhhHHHHhhhhhh1111LLL1111hhhhhhhhhh111111111hh
Query --gllldadlxptrSACIaifearaqhpWPPRVatlpwpliayaglegldhlelartvd 273
ident |
Sbjct lgvtgvageplpvdSEKD-----ifdYIQWK----- 318
DSSP 1111111111111LHHH-----hhhHLLL-----

DSSP hhhhhhhhhhhhh1111
Query aaaqavqrfvaridrskr 292
ident
Sbjct -----yrepkdrse 327
DSSP -----111111111

```

No 322: Query=mol1A Sbjct=3jppA Z-score=6.5

[back to top](#)

```

DSSP -----
Query ----- 0
ident
Sbjct tlnggitdmltelanfeknvsqaihkynayrkaasviakyphkiksgaeakklpgvgtki 60
DSSP 111hhhhhhhhhhhhhhhh1111hhhhhhhhhhhhhhhh111111hhhh11111hh

DSSP -----111111111hh
Query -----aapyspntnlr 12
ident
Sbjct aekideflatgklrklekirqddtssinfltrvsgigpsaarkfvdegiktledlrkne 120
DSSP hhhhhhhhh1111hhhhhhhh1hhhhhhhh111111hhhhhhhh11111hhhh11h

DSSP hhhhhhhhhhh1111hhhhHHHHHHHHHHHHH-LLLL11LLLLEEEHHHHHHhh11
Query slrdrltqvaerqgvfgrlqRHVAXIVVAQFAA-TLTDdtGAPLLLKGGSSLELrri 71

```

```

Sbjct dklnhhqriglkyfgdfekriPREEMLMQDIVLnEVKKvdSEYIAIVCGSFRRGA---- 176
DSSP  hhl1hhhhhhhh1hhhh11eEHHHHHHHHHHHHHHHHHh1LLEEEELHHHLLL----

DSSP  1111LLEEEEEEEL-----1LHHHHHHHHHHHHhh111leeEEELLEEL111
Query  pdsrTSKDFATVAR-----rDIELIHEQLADAGetgwegftAIFTAPEEJaap 119
ident  | | | | |
Sbjct  ---eSSGMDVLLThpsftsestkpqkLLHQVVEQLQKVH-----FITDTLSKG--- 222
DSSP  ---1EELLEEEEEE111111111111HHHHHHHHHHHLL-----LEEEEEEEL---

DSSP  111LLEEEEEEEL--LEEEEEEEL-LLLL1111eeeee1hhhh11111lee
Query  gxpVKPRRFTAKLSYR--GRAFATVPIEVSSV-EAGNadqfdt1tsdalglvgvpaavav 176
ident  | | | | |
Sbjct  ---ETKFMGVCQLPSKndEKEYPHRRIDIRLIpKDQY----- 256
DSSP  ---LLEEEEEEELLLL11LLEEEEEEEL1HHHH-----

DSSP  eel1hHHHHhhhhhh1111111111HHHHHH-----hhhhh
Query  pcxtiPWQIaqlhavlavleepkandraHDLVDLQ-----llegl 217
ident  | | | | |
Sbjct  ---yCGVL-----yftgSDIFNKNmrahalekgftineytirplgvtg 296
DSSP  ---hHHHH-----hhl1LHHHHhhhhhh1leeel111ee11111

DSSP  11hHHHHhhHHHHhhhhhh111LLELL11111hhhhhhhh1111111111hhhhhh
Query  1ldADLXptRSACIaifearaqhpWPPRVat1phwplyagalegldhlelartvdaaaq 277
ident  | | | | |
Sbjct  vagEPLP--VDSEK-----difDYIQW----- 316
DSSP  111LLELL--LLLHH-----hHHHLL-----

DSSP  hhhhhhhhhhh1111
Query  avqrfvaridratkr 292
ident  | | | | |
Sbjct  ----kyrepkdrse 326
DSSP  ----1111hh111

```

No 323: Query=mol1A Sbjct=4k1dA Z-score=6.5

[back to top](#)

```

DSSP  -----
Query  ----- 0
ident  -----
Sbjct  tlnggitdmltelanfeknvsqaihkynayrkaasviakyphkiksgaeakklpgvgtki 60
DSSP  111hhhhhhhhhhhhhh111hhhhhhhhhhhhhh111111hhhh11111hh

DSSP  -----11111111hh
Query  -----aapyspntlr 12
ident  -----
Sbjct  aekideflatgklrklekirqddtssinfltrvsgigpsaarkfvdegiktledlrkne 120
DSSP  hhhhhhhhh111hhhhhhhh1hhhhhhhh111111hhhhhhhh1111hhhh11h

DSSP  hhhhhhhhhhh111hhhhHHHHHHHHHHH-LLLL11LLEEEHHHHHHhh11
Query  slrdrltqvaerqgvfgrlqRHXIVVAQFAA-TLTDdtGAPLLLVKGGSSLELrrgi 71
ident  | | | | |
Sbjct  dklnhhqriglkyfgdfekriPREEMLMQDIVLnEVKKvdSEYIATVCGSFRRGA---- 176
DSSP  hhl1hhhhhhhh1hhhh11eEHHHHHHHHHHHHHHHHHh1LLEEEELLLLLL----

DSSP  1111LLEEEEEEEL-----1LHHHHHHHHHHHHhh111leeEEELLEEL111
Query  pdsrTSKDFATVAR-----rDIELIHEQLADAGetgwegftAIFTAPEEJaap 119
ident  | | | | |
Sbjct  ---eSSGMDVLLThpsftsestkpqkLLHQVVEQLQKVH-----FITDTLSKG--- 222
DSSP  ---1EELLEEEEEE111111111111HHHHHHHHHHHLL-----LEEEEEEEL---

DSSP  111LLEEEEEEEL--LEEEEEEEL-LLLL1111eeeee1hhhh11111lee
Query  gxpVKPRRFTAKLSYR--GRAFATVPIEVSSV-EAGNadqfdt1tsdalglvgvpaavav 176
ident  | | | | |
Sbjct  ---ETKFMGVCQLPSKndEKEYPHRRIDIRLIpKDQY----- 256
DSSP  ---LLEEEEEEELLLL11LLEEEEEEEL1HHHH-----

```

DSSP ee11HHHHHHHHHHHHHH1111111111HHHHHHH-----hHHHH  
Query pcxtiPWQIaqlhavtavleepkandraHDLVDLQ-----llegl 217  
ident |  
Sbjct ---yCGVL-----yftgSDIFNKNmrahalekgftineytirplgvtg 296  
DSSP ---hHHHH-----hhh1LHHHHHHHHHHHHHlee1111lee1111

DSSP 11hHHHHhhHHHHHHHHHH1111LLLLL1111hHHHHHHHH1111111111hHHHH  
Query 1ldADLXptRSACIaifearaqhWPPRVatlpwpliyagalegldhlelartvdaaaq 277  
ident |  
Sbjct vagEPLP--VDSEK-----difDYIQW----- 316  
DSSP 111LLLL--LLHH-----hhhHLLL-----

DSSP hHHHHHHHHH1111  
Query avqrfvaridratkr 292  
ident  
Sbjct ----kyrepkdrse 326  
DSSP ----1111hh111

No 324: Query=mol1A Sbjct=4rq6A Z-score=6.5

[back to top](#)

DSSP -----  
Query ----- 0  
ident  
Sbjct tlnggitdmltelanfeknvsqaihkynayrkaasviakyphkiksgaeakklpgvgtki 60  
DSSP 111hHHHHHHHHHHHHHH1111hHHHHHHHHHHHHHH1111111hHHHH11111hHH

DSSP -----111111111hh  
Query -----aapyspntlr 12  
ident  
Sbjct aekideflatgklrklekirqddtssinfltrvsgigpsaarkfvdegiktledlrkne 120  
DSSP hHHHHHHHH111hHHHHHH1hHHHHHHHH11111hHHHHHH1111hHHHH11h

DSSP hHHHHHHHHHH1111hHHHHHHHHHHHHHHH-LLLL111LLEEEHHHHHHHHh11  
Query slrdrltqvaerqgvfgrlqRHVAXIVVAQFAA-TLTDdtGAPLLLVKGGSSLELrri 71  
ident | |  
Sbjct dklnhhqrigrlyfgdfekriPREEMLQMQDIVLnEVKkvdSEYIATVCGSFRGA---- 176  
DSSP hh11hHHHHHH1hHHH111eHHHHHHHHHHHHHHHH11LLEEEELHHHLLL----

DSSP 1111LLEEEEL-----1LHHHHHHHHHHHHH1111eEEELLEE1111  
Query pdsrTSKDFATVAR-----rDIELIHEQLADAGetgwegftAIFTAPEEiaap 119  
ident | | | | |  
Sbjct ---eSSGDMVDLLThpsftsestqpkLLHQVVEQLQKVH-----FITDTLSK---- 221  
DSSP ---1EELLEEEEEE111111111111HHHHHHHHHHLL-----LEEEEEE----

DSSP 111LLEEEEEEEL--LEEEEEEEL-LLLL1111eEEE1hHH11111lee  
Query gxpVKPRRFTAKLSYR--GRAFATVPIEVSSV-EAGNadqfdtlttsdalglvgvpaavav 176  
ident | |  
Sbjct --gETKFMGVCQLPSKndeKEYPHRRIDIRLlpKDQY----- 256  
DSSP --1LLEEEEEE111111111111LLEEEEEEEL1HHHH-----

DSSP ee11HHHHHHHHHHHH1111111111HHHH-----hHHHHHH  
Query pcxtiPWQIaqlhavtavleepkandraHDLV-----dlqlllegl 217  
ident |  
Sbjct ---yCGVL-----yftgSDIFnknmrahalekgftineytirplgvtg 296  
DSSP ---hHHHH-----hhh1LHHHHHHHHHHHHHlee1111lee1111

DSSP 11hHHHHhhHHHHHHHHHH1111LLLLL1111hHHHHHHHH1111111111hHHHH  
Query 1ldADLXptrSACIaifearaqhWPPRVatlpwpliyagalegldhlelartvdaaaq 277  
ident |  
Sbjct vagEPLPV--DSEK-----difDYIQWKY----- 318  
DSSP 111LLLL--LLHH-----hhhHLLLL-----

DSSP hHHHHHHHHH1111  
Query avqrfvaridratkr 292  
ident

DSSP -----11hhhh11

No 325: Query=mol1A Sbjct=1xslM Z-score=6.5

[back to top](#)

```

DSSP -----
Query ----- 0
ident -----
Sbjct atnhnlhiteklevlakaysvqgdkwralgyakainalksfhkpvttsyqeacsipgigr 60
DSSP 11111hhhhhhhhhhhhhhhhhh111hhhhhhhhhhhhhhhh111111hhhhhh1111hh

```

```

DSSP -----1111111111hhhh
Query -----aapyspptnlrsl 14
ident -----
Sbjct maekiieilesghlrkldhisesvpvlelfsniwgagtktaqmwyqqgfrslelirsqas 120
DSSP hhhhhhhhhhh111hhhh11111hhhhhhhhhh111111hhhhhhhhhh11111hhhhhhhh11

```

```

DSSP hhhhhhhhh1111hHHHHHHHHHHHHHHHHHLL-LLLLLLEEEHHHHHHHHhh1111
Query rdrltqvaerqgvvfGRLQRHVAXIVVAQFAATL-TDDTGAPLLLKGGSSLELrrgipd 73
ident | | | | |
Sbjct lttqqaiglkhysdfLERMPREEATEIEQTVQKAaQAFNSGLLCVACGSYRRGK----- 174
DSSP 11hhhhhhhh1hhhhHLEEHHHHHHHHHHHHHHHHLLLLLLLEEEELHHHHLLL-----

```

```

DSSP 11LLLLLEEEEL-----1LHHHHHHHHHHHHhh1111eeEELL-EELL1LLLLL
Query srTSKDFATVAR-----rDIELIHEQLADAGetwegftaIFTAP-EEIAApGXPVK 124
ident | | | | |
Sbjct -aTCGDVDVLIThpdgrshrgIFSRLDSLRLQEG-----FLTDDIVSQEE-NGQQQ 223
DSSP -1EELLEEEEEE11111111LHHHHHHHHHHHLL-----LEEEeEEEE-ELLEE

```

```

DSSP LEEEEEEEEE11EEEEEEEEEEEL-LLLL1111eeee1hhhh111111eeeee1hhHH
Query PRRFTAKLSYrgRAFATVPIEVSSV-EAGNadqfdtltsdalglvgvpaavavpcxtiPW 183
ident | | | | |
Sbjct KYLGVCRLPG--PGRRRRLDIIIVpYSEF-----aCA 254
DSSP EEEEEELLLL--LLLLLEEEEEEEL1HHHH-----hHH

```

```

DSSP HHHhhhhhh1111111111HHHHHHH-----hhhh1
Query QIaqklhavtavleekandraHDLVDLQ-----llegll 218
ident -----
Sbjct LL-----yftgSAHFNRSmralaktkgmslsehalstavrnthgckvg 298
DSSP HH-----hh1LHHHHHHhhhhhh11eeel111eeellee111111ee

```

```

DSSP 1hHHHHhhHHHHhhhhhh1111LLLLL11111hhhhhhhh1111111111hhhhhhhh
Query ldADLXptRSACIaifearaqhpWPPRVatlpwplyagaleglhdlelartvdaaaqa 278
ident |
Sbjct pgRVLP--TPTEK-----dvfRLLGL----- 317
DSSP 11LEEL--LLLHH-----hhHLLL

```

```

DSSP hhhhhhhhh1111
Query vqrfvaridratkr 292
ident -----
Sbjct ----pyrepaerdw 327
DSSP ----1111hhhh111

```

No 326: Query=mol1A Sbjct=2bcrA Z-score=6.5

[back to top](#)

```

DSSP -----
Query ----- 0
ident -----
Sbjct nhnlhiteklevlakaysvqgdkwralgyakainalksfhkpvttsyqeacsipgigrma 60
DSSP 111hhhhhhhhhhhhhhhhhh111hhhhhhhhhhhhhhhh11111111hhhh11111hhhh

```

DSSP -----1111111111hhhhhh





DSSP EEEEEEE1EEEEEEEEEEEL-LLLL1111eeeeelhhhh111111eeeeel1hHHHHh  
Query FTAKLSYrgRAFATVPIEVSSV-EAGNadqfdt1tsdalglvgvpaavavpcxtiPWQ1a 186  
ident | |  
Sbjct GVCRLPG--PGRRHRRLDIIIVpYSEF-----aCALL- 254  
DSSP EEELLLL--LLLLEEEEEEEL1HHHH-----hHHHH-

DSSP hhhhhhh111111111111HHHHHHH-----hhhh11hH  
Query qklhvtavleepkandraHDLVDLQ-----lleg111dA 221  
ident |  
Sbjct -----yftgSAHFNRSmralaktkgmslsehalstavvrnthgakvpggR 299  
DSSP -----hhh1LHHHHHHhhhhhh11eee1111eeel111111111111E

DSSP HHHhhHHHHHhhhhhh1111LLLLL11111hhhhhhhh1111111111hhhhhhhh  
Query DLXptRSACIaifearaqhpWPPRVat1phwpliyagaleglhdhleartvdaaaqavqr 281  
ident |  
Sbjct VLP--TPTEK-----dvfRLLGL----- 315  
DSSP EEL--LLLH-----hhhHLLL-----

DSSP hhhhhhh1111  
Query fvaridratkr 292  
ident |  
Sbjct -pyrepaerdw 325  
DSSP -1111hhhh11

No 328: Query=mol1A Sbjct=lrztA Z-score=6.5

[back to top](#)

DSSP -----  
Query ----- 0  
ident |  
Sbjct atnhnlhiteklevlakaysvqgdkwralgyakainalksfhkpvtsyqeacsipgigkr 60  
DSSP 11111hhhhhhhhhhhhhhhh111hhhhhhhhhhhhhh111111hhhhhh11111h

DSSP -----1111111111hhhh  
Query -----aapyspptnlrsl 14  
ident |  
Sbjct maekieielesghlrkldhisesvplvelfsnwagtktaqmwyqqgfrslelirsqas 120  
DSSP hhhhhhhhhhh111hhhh111hhhhhhhh111111hhhhhhhh11111hhhhhh11

DSSP hhhhhhhhh1111hHHHHHHHHHHHHHHHLL-LLLLLLLEEEHHHHHHhh1111  
Query rdr1tqvaerqvvfGRLQRHVAXIVVAQFAATL-TDDTGAPLLLVKGGSSLELrrgipd 73  
ident | | |  
Sbjct lttqqaiglkhydfLERMPREATEIEQTVQKAaQAFNSGLLCVACGSYRRGK----- 174  
DSSP 11hhhhhhhh11hhhhHLLLEHHHHHHHHHHHHHLLLLLLLEEEELHHHHLLL-----

DSSP 11111LEEEEL-----1LHHHHHHHHHHHHhh1111eeEELL-EELL111111  
Query srTSKDFATVAR-----rDIELIHEQLADAGetgwegftaIFTAP-EEIAApGXPVK 124  
ident | | | | |  
Sbjct -aTCGDVDVLIThpdgrshrgIFSRLDLSLRQEG-----FLTDDIVSQEE-NGQQQ 223  
DSSP -1EELLEEEEL11111111LHHHHHHHHHHLL-----LEEEeEEEE-ELLEE

DSSP LEEEEEE1EEEEEEEEEEEL-LLLL1111eeeeelhhhh111111eeeeel1hHH  
Query PRRFTAKLSYrgRAFATVPIEVSSV-EAGNadqfdt1tsdalglvgvpaavavpcxtiPW 183  
ident | |  
Sbjct KYLGVCRLPG--PGRRHRRLDIIIVpYSEF-----aCA 254  
DSSP EEEEEELLLL--LLLLEEEEEEEL1HHHH-----hHH

DSSP HHhhhhhhhh111111111111HHHHHHH-----hhhh11h  
Query QIaqklhvtavleepkandraHDLVDLQ-----lleg111d 220  
ident |  
Sbjct LL-----yftgSAHFNRSmralaktkgmslsehalstavvrnthgckvg 298  
DSSP HH-----hhh1LHHHHHHhhhhhh11eee1111eeel111111111111ee

DSSP hhhhhHHHHHHhhhh1111LLLLL11111hhhhhhhh1111111111hhhhhhhh  
Query adlxptRSACIaifearaqhpWPPRVat1phwpliyagaleglhdhleartvdaaaqavq 280

Sbjct pgrvIPPIEK-----dVIKLLGL----- 317  
DSSP 1111111111HH-----hhhHLLL-----

DSSP hhhhhhhhh1111  
Query rfvaridratkr 292  
ident  
Sbjct --pyrepaerdw 327  
DSSP --1111hhhh111

No 329: Query=mol1A Sbjct=7icoA Z-score=6.5

[back to top](#)

DSSP -----  
Query ----- 0  
ident  
Sbjct etlnggitdmltelanfeknvsqaihkynayrkaasviakyphkiksgaeakklpgvgtk 60  
DSSP 11111hhhhhhhhhhhhhhhh1111hhhhhhhhhhhhhhhh111111hhhh111111hh

DSSP -----1111111111h  
Query -----aapyspsptnl 11  
ident  
Sbjct iaekideflatgklrklekirqddtsssinfltrvsgigpsaarkfvdegiktledlrkn 120  
DSSP hhhhhhhhh1111hhhhhhhhhhhhhhhh111111hhhhhhhh111111hhhhhh11

DSSP hhhhhhhhhhh1111hhhhhhHHHHHHHHHHHHHHH-LLLL11LLLEEEHHHHHHHHhh1  
Query rslrdrltqvaerqgvfgrlqRHVAXIVVAQFAA-TLTDdtGAPLLLKGGSSLELrrg 70  
ident | |  
Sbjct edklnhhqriglkygdfekriPREEMLQMQDIVLnEVKKvdSEYIATVCGSFRGA--- 177  
DSSP 11111hhhhhhhh111hhhl1eHHHHHHHHHHHHHHHHHH11LLLLLLLLHHHHLL---

DSSP 11111LLLEEEEL-----1LHHHHHHHHHHHHhh1111eeEEELLEEL11  
Query ipdsrTSKDFATVAR-----rDIELIHEQLADAGetgwegftAIFTAPEEIAa 118  
ident | | | | |  
Sbjct ----eSSGDMVLLThpsftsestqpkLLHQVVEQLQKVH-----FITDTLSKG-- 223  
DSSP ----1EELLEEEEEEe1111111111hHHHHHHHHHHHLL-----LEEEEEEEL--

DSSP 11111LLLEEEEEEEL--EEEEEEEEEEEL-LLLL1111eeeee1hhhh11111ee  
Query pgxpVKPRRFTAkLSYRG--RAFATVPIEVSSV-EAGNadqfdtltsdalglvgvpaava 175  
ident | | | | |  
Sbjct ----ETKFMGVCQLPSKNdeKEYPHRRIDIRLIpKDQY----- 257  
DSSP ----LLEEEEEEELLLL1111111111LEEEEEEeHHHL-----

DSSP ee11hHHHHHHhhhhhh1111111111hhhhHHHHHH-----  
Query vpcxtiPWQIAQklhavtavlepkandrahd1vDLQLE----- 215  
ident  
Sbjct ----yCGVLYF-----tgSDIFNKnmrahalekgftineytirp 292  
DSSP ----hHHHHHH-----h1LHHHHHHhhhhhhhh1leee1leeee

DSSP -hh11hhhhhhhhHHHHHHhhhh1111111111hhhhhhhh1111111111hh  
Query -gl1ldadlxptRSACIaifearaqhpWPPRVAtlphwplyagalegldhlelartvda 274  
ident  
Sbjct lgvtagvageplpVDEK-----difDYIQWK----- 318  
DSSP 1111111111111111LH-----hhhHLLLL-----

DSSP hhhhhhhhhhh1111  
Query aaqavqrfvaridratkr 292  
ident  
Sbjct -----yrepkdrse 327  
DSSP -----111111111

No 330: Query=mol1A Sbjct=3hw8A Z-score=6.5

[back to top](#)

```

Query ----- 0
ident
Sbjct atnlnlhitteklevlakaysvqgdkwralgyakainalksfhkpvtysqeacsipgigkr 60
DSSP llllllhhhhhhhhhhhhhhhhhhh111hhhhhhhhhhhhhhhhhhh111lllllhhhhhh111llhh

DSSP -----1llllllllllhhhh
Query -----aapyspntlrsl 14
ident
Sbjct maekiiieilesghlrklhdhisesvplelfsniwgagtktaqmwyqgfrsledirsqa 120
DSSP hhhhhhhhhhh111llhhhh111llhhhhhhhhhh111llllhhhhhhhhhh111llhhhhhhhh11

DSSP hhhhhhhhhhh111llhhHHHHHHHHHHHHHHHHHL-LLLLLLLLLEEEHHHHHHHHhh11ll
Query rdrltqvaerqgvvfgrLQRHVAXIVVAQFAATL-TDDTGAPLLLKGGSSLELrrgipd 73
ident
Sbjct lttqqaiglkhydsf1ERMPREEATEIEQTVQKAAQAFNSGLLVCACGSYRRGK----- 174
DSSP llhhhhhhhhhh11llllHHHHHHHHHHHHHHHHHHHL-LLLLLLLLLEEEELHHHHLLL-----

DSSP lllllLEEEEL-----lLHHHHHHHHHHHHHHhh11llleeeEELLEELL111llllll
Query srTSKDFATVAR-----rDIELIHEQLADAGetgwegftaIFTAPEEIAapgxPVKP 125
ident
Sbjct -aTCGDVDVLIThpdgrshrgrIFSRLDLSLRQEG-----FLTDDLVSQeengQQQK 224
DSSP -1EELEEEEEE11111111LHHHHHHHHHHHL-----LEEEEL111111LLE

DSSP EEEEEEE11EEEEEEEEEEEL-LLLLllleeeehhhhh1111leeeelhHHH
Query RRF TAKLSYrgRAFATVPIEVSSV-EAGNadqfdtltsdalglvgvpaavavpcxtiPWQ 184
ident
Sbjct YLVCRLPG--PGRRHRRLDIIVVpYSEF-----aCAL 255
DSSP EEEEELLL--LLLLLEEEEEEEL1HHHH-----hHHH

DSSP Hhhhhhhhh1111111111HHHHHHH-----hhhhh11
Query IaqlhавtavleepkandraHDLVDLQ-----lleglll 219
ident
Sbjct L-----yftgSAHFNRSmralaktkgmslsehalstavrnthgakvgp 299
DSSP H-----hhhLHHHHHHhhhhhhhh1leeellleee1111111111

DSSP hHHHHhhHHHHhhhhhh1111LLLLLL1111hhhhhhhh1111111111hhhhhhhh
Query dADLXptRSACIaifearaqhpWPPRVatlphwpliyagaleglldhlelartvdaaaqav 279
ident
Sbjct gRVLP--TPTEK-----dvfRLGL----- 317
DSSP 1EELL--LLLHH-----hhhhHLLL-----

DSSP hhhhhhhhh1111
Query qrfvaridratkr 292
ident
Sbjct ---pyrepaerdw 327
DSSP ---1111hhhh11

```

No 331: Query=mol1A Sbjct=4uazA Z-score=6.5

[back to top](#)

```

DSSP ----- 0
Query -----
ident
Sbjct tlnggitdmltelanfeknvsqaihkynayrkaasviakyphkiksgaeaklpgvgtki 60
DSSP lllhhhhhhhhhhhhhhhhhhhh111hhhhhhhhhhhhhhhhhh111lllllhhhhhh111llhh

DSSP -----1llllllllllhh
Query -----aapyspntlr 12
ident
Sbjct aekideflatgklrklekirqddtsssinfltrvsgigpsaarkfvdegiktledlrkne 120
DSSP hhhhhhhhhhh111hhhhhhhhhhhhhhhhhh111llllhhhhhhhhhh111llhhhhhhhh

DSSP hhhhhhhhhhh111llhhhhHHHHHHHHHHHHHH-LLLL111LLLEEEHHHHHHhh11
Query slrdrltqvaerqgvfgrlqRHVAXIVVAQFAA-TLTDdtGAPLLLKGGSSLELrrgi 71
ident
Sbjct dklnhhqrigrkyfgdfekriPREEMLMQDIVLnEVKKvdSEYIATVCGSFRGA---- 176

```

DSSP 1111LLLLLEEEEL-----1LHHHHHHHHHHHHhh1111eeEEELLLEE1111  
Query pdsrTSKDFATVAR-----rDIELIHEQLADAGetgwegftAIFTAPEEiaap 119  
ident | | | | |  
Sbjct ---eSSGDMDVLLThpsftsetkqpkLLHQVVEQLQKVH-----FITDTLSK---- 221  
DSSP ---1EELLEEEEE1111111111HHHHHHHHHHLL-----LEEEEEEE----

DSSP 1111LEEEEEEEEL--LEEEEEEEEEEL-LLLL1111eeeeelhhh1111lee  
Query gxpVKPRRFTAKLSYR--GRAFATVPIEVSSV-EAGNadqfdtlttsdalglvgvpaavav 176  
ident | | | | |  
Sbjct --gETKFMGVCQLPSKndEKEYPHRRIDIRLIpKDQY----- 256  
DSSP --1LEEEEEELLLL1111111111HHHH-----

DSSP eel1hHHHHhhhhhhhh1111111111HHHH-----hhhhhhhh1  
Query pcxtiPWQIaqlhavtavleekandraHDLV-----dlqllegll 218  
ident | | | | |  
Sbjct ----yCGVL-----yftgSDIFnknmrahalekgftineytirplgtgv 296  
DSSP ----hHHHH-----hhh1LHHHHhhhhhhhhhh1lee1111ee1111

DSSP 1hHHHHHHhhhhhhhh1111111111HHHHhhhh1111111111hhhhhh  
Query ldADLXPtRSACIaifearaqhPWPPRVat1phwpliyagaleglhdlhlarvtvdaaaqa 278  
ident | | | | |  
Sbjct agEPLPV--DSEK-----difdYIQWKY----- 317  
DSSP 11111111--LLHH-----hhhhL11111

DSSP hhhhhhhhh1111  
Query vqrfvaridrskr 292  
ident | | | | |  
Sbjct -----repkdrse 325  
DSSP -----11hhhh111

No 332: Query=mol1A Sbjct=4rq3A Z-score=6.5

[back to top](#)

DSSP -----0  
Query -----  
ident | | | | |  
Sbjct tlnggitdmltelanfeknvsqaihknayrkaasviakyphkiksgaeakklpgvgtki 60  
DSSP 111hhhhhhhhhhhhhh1111hhhhhhhhhhhhhh11111111hhhh11111hh

DSSP -----111111111hh  
Query -----aapyspntlr 12  
ident | | | | |  
Sbjct aekideflatgklrklekirqddtsssinf1trvsgigpsaarkfvdegiktledlrkne 120  
DSSP hhhhhhhhh111hhhhhh11hhhhhhhhhh111111hhhhhhhh1111hhhhhh11h

DSSP hhhhhhhhhhh1111hhhhHHHHHHHHHHHH--LLLL1111LEEEHHHHHHhh11  
Query slrdrltqvaerqgvfgrlqRHVAXIVVAQFAA-TLTDdtGAPLLLVKGGSSLELrgi 71  
ident | | | | |  
Sbjct dklnhhqrigrlyfgdfekriPREEMLMQDIVLnEVKvdSEYIATVCGSFRGA---- 176  
DSSP hh11hhhhhhhh11hhhh11eHHHHHHHHHHHHHHHHHH1LLEEEELHHHHLL----

DSSP 1111LLLLLEEEEL-----1LHHHHHHHHHHHHhh1111eeEEELLLEE1111  
Query pdsrTSKDFATVAR-----rDIELIHEQLADAGetgwegftAIFTAPEEiaap 119  
ident | | | | |  
Sbjct ---eSSGDMDVLLThpsftsetkqpkLLHQVVEQLQKVH-----FITDTLSK---- 221  
DSSP ---1EELLEEEEE111ee1111HHHHHHHHHHLL-----LEEEEEEE----

DSSP 1111LEEEEEEEEL--1EEEEEEEEEL-LLLL1111eeeeelhhh1111lee  
Query gxpVKPRRFTAKLSYR--GRAFATVPIEVSSV-EAGNadqfdtlttsdalglvgvpaavav 176  
ident | | | | |  
Sbjct --gETKFMGVCQLPSKndEKEYPHRRIDIRLIpKDQY----- 256  
DSSP --1LEEEEEELLLL1111111111HHHH-----

DSSP eel1hHHHHhhhhhhhh1111111111HHHH-----hhhhhhhh

```

ident |
Sbjct  ---yCGVL-----yftgSDIFnknmrahalekgftineytrplgtg 296
DSSP  ---hHHHH-----hhlLHHHHhhhhhhhhhhhh1leeel111eeel1111

DSSP  11hHHHHHHhhHHHHhhhhhh111LLLLL11111hhhhhhhhhh1111111111hhhhhh
Query  11dADLXPtrSACIaifearaqhPWPPRVat1phwpliyagaleglhdhlelartvdaaaq 277
ident  |
Sbjct  vagEPLPV--DSEK----difdYIQWKY----- 318
DSSP  111LLLLL--LHH-----hhhhL11111

DSSP  hhhhhhhhhhh1111
Query  avqrfvaridrskr 292
ident  |
Sbjct  -----repkdrse 326
DSSP  -----11hhhh11

```

No 333: Query=mol1A Sbjct=5cr0B Z-score=6.5

[back to top](#)

```

DSSP  -----111111111hhhhhhhhhhhh1111hHHHHHHHHH
Query  -----aapyspntnrslrdrltqvaerqgvfGRLQRHVAX 38
ident  |
Sbjct  pvlelfsnwigagtktaqmwyqqgfrsledirsqaslttqqaiglkhsdfLERMPREEA 60
DSSP  11hhhhhh11111hhhhhhhhhh11111hhhhhhhh11111hhhhhhhh1hhhhLLEEHHHH

DSSP  HHHHHHHHLL-LLLLLLEEEHHHHHHhh11111LLEEEL-----LHH
Query  IVVAQFAATL-TDDTGAPLLLVKGGSSLELrrgipdsrTSKDFATVAR-----rDIE 89
ident  | | | | |
Sbjct  TEIEQTVQKaaQAFNSGLLCVACGYSYRRGK-----aTCGDVDVAIThpdrshrgIFS 113
DSSP  HHHHHHHHHHHhHHHLLLEEEELLLLLL-----1EELLEEEEE1111111HHH

DSSP  HHHHHHHHHhh1111leeEELLLE-ELL111LLLLLEEEEEE11EEEEEEEEEE
Query  LIHEQLADAGetgwegftAIFTAPE-EIAApgXPVKPRRFTAKLSYrgRAFATVPIEVSS 148
ident  | | | | |
Sbjct  RLLDSLRQEG-----FLTDDLvsQEEN--GQQQKYLGVCR LPG--PGRRRRLDIIV 161
DSSP  HHHHHHHHLL-----LEELEEeEEEE--LLEEELLLL--LLLLLEEEEEE

DSSP  L-LLLL1111eeeeelhhhh11111111111111111111HH
Query  V-EAGNadqfdlttsdalglvgvpaavapcxtiPWQIaqklhavtavlepkandraHD 207
ident  |
Sbjct  VpYSEF-----aCALL-----yftgSA 178
DSSP  L1HHHH-----hHHHH-----hhl1LH

DSSP  HHHHH-----hhhh11hHHHHhhHHHHhhhhhh1111L
Query  LVDLQ-----1leg111dADLXptRSACIaifearaqhPW 242
ident  |
Sbjct  HFNRSmralktgmslsehalstavvrnthgckvgpgRVLP--TPTEK-----dvfR 229
DSSP  HHHHHhhhhhh11lee1111eeleee11111111111111111111L1111LHH-----hhH

DSSP  LLLL11111hhhhhhhhhh1111111111111111111111111111
Query  PPRVat1phwpliyagaleglhdhlelartvdaaaqavqrfvaridrskr 292
ident  |
Sbjct  LLGL-----pyrepaerdw 243
DSSP  HLLL-----1111hhhh11

```

No 334: Query=mol1A Sbjct=5iimA Z-score=6.5

[back to top](#)

```

DSSP  -----
Query  ----- 0
ident  |
Sbjct  tnhnlhiteklevlakaysvqgdkwralgyakainalksfhkpvtsyqeacsipigikrm 60
DSSP  1111hhhhhhhhhhhhhhhhhh111hhhhhhhhhhhhhhhh1111111hhhh11111hh

```

```

DSSP -----111111111nnnnn
Query -----aapyspptnlrslr 15
ident
Sbjct aekieilesghlrkldhisesvpvlelfsniwgagtktaqmwyqqgfrsledirsqs1 120
DSSP hhhhhhhhh111hhhh111hhhhhhhh11111hhhhhhhhhh1111hhhhhhhh111

DSSP hhhhhhhhh1111hHHHHHHHHHHHHHHHLL-LLLLLLLLLEEEHHHHHHHHhh11111
Query drltqvaerqgvvfgRLQRHVAXIVVAQFAATL-TDDTGAPLLLKGGSSLELrrgipds 74
ident
Sbjct ttqqaiglkhsdfIERMPREATEIEQTVQKAaQAFNSGLLCVACGSYRRGK----- 173
DSSP 1hhhhhhhh1hhhhhhLLEHHHHHHHHHHHHHHHLLLEEEELHHHHLLL-----

DSSP 1LLLLLEEEEL-----1LHHHHHHHHHHHHhh1111eeEELLEELL1111LLLE
Query rTSKDFATVAR-----rDIELIHEQLADAGetgwegftaIFTAPEEIAapgxPVKPR 126
ident
Sbjct aTCGDVDVLIThpdgrshrgIFSRLLDLSLRQEG-----FLTDDLVSQeengQQQKY 224
DSSP 1EELLEEEEEE11111111HHHHHHHHHHHLL-----LEEEEEE1111LLLEE

DSSP EEEEEEE11EEEEEEEEEEELLLLLL111eeeeelhhhh11111eeeeellhHHHHh
Query RFTAKLSYrgRAFATVPIEVSSVEAGNAdqfdt1tsdalglvgvpaavavpctiPWQIa 186
ident
Sbjct LGVCRLPG--PGRHRRLDIIVVPYSEF-----aCALL- 255
DSSP EEEELLLL--LLLLLEEEEEEELHHHH-----hHHHH-

DSSP hhhhhhh111111111111HHHHHHH-----hhhh11hH
Query qklhavtavleepkandraHDLVDLQ-----1leg111dA 221
ident
Sbjct -----yftgSAHFNRSmralaktkgmslsehalstavvrnthgckvpggR 300
DSSP -----hhh1LHHHHHHhhhhhh111ee1111ee1111ee1111ee11E

DSSP HHHhhHHHHHHhhhhhh1111LLLLL11111hhhhhhhhhh1111111111hhhhhhhhhh
Query DLXptRSACIaifearaqhpWPPRVat1phwpliyagaleglhdhlelartvdaaaqavqr 281
ident
Sbjct VLP--TPTEK-----dvfRLLGL----- 316
DSSP ELL--LLLHH-----hhhHLLL-----

DSSP hhhhhhh1111
Query fvaridratkr 292
ident
Sbjct -pyrepaerdw 326
DSSP -1111hhhh111

```

No 335: Query=mol1A Sbjct=5iinA Z-score=6.5

[back to top](#)

```

DSSP -----
Query ----- 0
ident
Sbjct tnhlhiteklevlakaysvqgdkwralgyakainalksfhkpvtsyqeacsipgigkrm 60
DSSP 1111hhhhhhhhhhhhhhhh111hhhhhhhhhhhhhhhh111111hhhh11111hh

DSSP -----111111111hhhhh
Query -----aapyspptnlrslr 15
ident
Sbjct aekieilesghlrkldhisesvpvlelfsniwgagtktaqmwyqqgfrsledirsqs1 120
DSSP hhhhhhhhh111hhhh111hhhhhhhh11111hhhhhhhhhh1111hhhhhhhh111

DSSP hhhhhhhhh1111hHHHHHHHHHHHHHHHLL-LLLLLLLLLEEEHHHHHHHHhh11111
Query drltqvaerqgvvfgRLQRHVAXIVVAQFAAT-LTDDTGAPLLLKGGSSLELrrgipds 74
ident
Sbjct ttqqaiglkhsdfIERMPREATEIEQTVQKAaQAFNSGLLCVACGSYRRGK----- 173
DSSP 1hhhhhhhh1hhhhhhLLEHHHHHHHHHHHHHHHLLLEEEELHHHHLLL-----

DSSP 1LLLLLEEEEL-----1LHHHHHHHHHHHHhh1111eeEELLEELL1111LLLE
Query rTSKDFATVAR-----rDIELIHEQLADAGetgwegftaIFTAPEEIAapgxPVKPR 126
ident

```









```
Sbjct  IttqqaiglkhysdILEKMPKEEAIEIEQIVKAAQAFNSGLLCVACGSYKRGK----- 174
DSSP  11hhhhhhhhhhhhHLEEHHEHHHHHHHHHHHHhHHHLLLLLLEEEELHHHHLLL-----

DSSP  11LLLLLEEEEL-----1LHHHHHHHHHHHHhh1111eeEEELLEEL11111LLL
Query  srTSKDFATVAR-----rDIELIHEQLADAGetgwegftAIFTAPEE|aapgxpVKP 125
ident  |  |  |  |  |  |  |
Sbjct  -aTCGDVDVLIThpdgrshrgIFSRLDLSLRQEG-----FLTDDLKVG-----ETK 219
DSSP  -1EELEEEEEE11111111LHHHHHHHHHHLL-----LEEEEEEEL-----LLE

DSSP  EEEEEEE11EEEEEEEEEEEL-LLLL1111eeeee1hhhh111111eeeee1hHHH
Query  RRFTAKLSYrgRAFATVPIEVSSV-EAGNadqfdt|tsdalglvgvpaavavpctxiPWQ 184
ident  |  |  |  |  |  |  |
Sbjct  YLGCRLPG--PGRRHRLDIIVVpYSEF-----aCAL 250
DSSP  EEEEELLL--LLLLLEEEEEEEL1HHHH-----hHHH

DSSP  Hhhhhhhhh1111111111HHHHHHH-----hhhh11
Query  Iaqk|havtavleepkandraHDLVDLQ-----lleg111 219
ident  |  |  |  |  |  |  |
Sbjct  L-----yftgSAHFNRSmralaktkgmslsehalstavrntngckvgp 294
DSSP  H-----hhlLHHHHHHhhhhhh1leeel111eeellee1111leeel

DSSP  hHHHHhhHHHHHHhhhh1111LLLLL11111hhhhhhhh1111111111hhhhhhh
Query  dADLXptRSACIaifearaqhpPPRVatlphwpliyagalegldh|elartvdaaaqav 279
ident  |  |  |  |  |  |  |
Sbjct  gRVLP--TPTEK-----dvfRLLGL----- 312
DSSP  1LLL--LLLHH-----hhHLLL-----

DSSP  hhhhhhhhh1111
Query  qrfvaridratkr 292
ident  |  |  |  |  |  |  |
Sbjct  ---pyrepaerdw 322
DSSP  ---1111hhhh11
```

No 340: Query=mol1A Sbjct=3mgiA Z-score=6.4

[back to top](#)

```
DSSP  ----- 0
Query  -----
ident  -----
Sbjct  hnlhiteklevlakaysvqgdkwralgyakainalksfhkpvtsyqeacsipgigkrmae 60
DSSP  11111hhhhhhhhhhhh1111hhhhhhhhhhhhhh11111hhhh11111hhhh

DSSP  -----111111111hhhhhh
Query  -----aapyspntlrslrdr 17
ident  -----
Sbjct  kiieilesghlrklhdhisvplvelfsniwgagtktaqmwyyqgfrs|ledirsqasltt 120
DSSP  hhhhhhh1111hhhh1111hhhhhhhh111111hhhhhhhh11111hhhhhh1111h

DSSP  hhhhhhh1111hhhhHHHHHHHHHHHHHL-LLLLLLLEEEHHHHHHhh11111L
Query  ltqvaerqgvfgrlQRHVXIVVAQFAAT-LTDDTGAPLLLKGGSSLELrrgipdsrT 76
ident  |  |  |  |  |  |  |
Sbjct  qqai|glkhysdflerMPREEAIE|EQTVQKaAQAFNSGLLCVACGSYRRGK-----aT 173
DSSP  hhhhhhh111hh11EEHHHHHHHHHHHHhhHHHLLLLLEEEELHHHHLLL-----1E

DSSP  LLEEEEL-----1LHHHHHHHHHHHHhh1111eeEEELLEEL11111LLEEE
Query  SKDFATVAR-----rDIELIHEQLADAGetgwegftAIFTAPEE|aapgxpVKPRRF 128
ident  |  |  |  |  |  |  |
Sbjct  CGDVDVLIThpdgrshrgIFSRLDLSLRQEG-----FLTDDLKVG-----ETKYL 219
DSSP  ELLEEEEEE11111111HHHHHHHHHHLL-----LEEEEEEEL-----LLEEE

DSSP  EEEEE11EEEEEEEEEEEL-LLLL1111eeeee1hhhh111111eeeee1hHHHHhh
Query  TAKLSYrgRAFATVPIEVSSV-EAGNadqfdt|tsdalglvgvpaavavpctxiPWQIaq 187
ident  |  |  |  |  |  |  |
Sbjct  VCRLPG--PGRRHRLDIIVVpYSEF-----aCALL-- 248
DSSP  EELLLL--LLLLLEEEEEEEL1HHHH-----hHHHH--
```



DSSP 111nnnn11

No 342: Query=mol1A Sbjct=2isoA Z-score=6.4

[back to top](#)

```

DSSP -----
Query ----- 0
ident -----
Sbjct tlnggitdmltelanfeknvsqaihkynayrkaasviakyphkiksgaeakklpgvgtki 60
DSSP 111hhhhhhhhhhhhhhhh111hhhhhhhhhhhhhhhh111111hhhhhh11111hh

```

```

DSSP -----111111111hh
Query -----aapysspptnlr 12
ident -----
Sbjct aekideflatgklrklekirqddtssinfltrvsgigpsaarkfvdegiktledlrkne 120
DSSP hhhhhhhhhhh111hhhhhhhh1hhhhhhhhhh111111hhhhhhhhhh1111hhhhhhhh

```

```

DSSP hhhhhhhhhhh1111hhhhHHHHHHHHHHHHHHH-LLLLLLLLLEEEHHHHHHHHhh11
Query slrdrltqvaerqgvfgrlqRHVAXIVVAQFAA-TLDDTGAPLLLKVGGSSELELrgi 71
ident | |
Sbjct dklnhhqrigrlykfygdfekriPREEMLQMQRDIVLnEVKKVDSEYIATVCGSFRRGA---- 176
DSSP hh11hhhhhhhh1hhhh111eHHHHHHHHHHHHHHHHHHLLLEEEELHHHHLLL----

```

```

DSSP 1111LLLLLEEEEL-----1LHHHHHHHHHHHHhh1111eeEELLEEL111
Query pdsrTSKDFATVAR-----rDIELIHEQLADAGetgwegftAIFTAPEElaap 119
ident | | | |
Sbjct ---eSSGDMVDLLThpsftsestkpqkLLHQVVEQLQKVH-----FITDTLSKG--- 222
DSSP ---1EELLEEEEEE111111111111HHHHHHHHHHHLL-----LEEEEEEEL---

```

```

DSSP 1111LEEEEEEEL--LEEEEEEEL-LLLL1111eeehhhhh1111lee
Query gxpVKPRRFTAKLSYR--GRAFATVPIEVSSV-EAGNadqfdtltsdalglvgvpaavav 176
ident | |
Sbjct ---ETKFMGVCQLPSKndEKEYPHRRIDIRLIpKDQY----- 256
DSSP ---LEEEEEEELLLL111111111111HHHHHHHHHHH-----

```

```

DSSP eel1hHHHHhhhhhhhh1111111111HHHHHHH-----hhhhh
Query pcxtiPWQIaqlhavtavleepkandraHDLVDLQ-----llegl 217
ident |
Sbjct ---yCGVL-----yftgSDIFNKNmrahalekgftineytirplgvtg 296
DSSP ---hHHHH-----hhhlHHHHHHhhhhhh11eeel1111eeel1111

```

```

DSSP 11hHHHHhhHHHHhhhhhh1111LLLLL1111hhhhhhhh1111111111hhhhhh
Query 1ldADLXptRSACIaifearaqhpWPPRVAAtlphwplyagalegldhlelartvdaaaq 277
ident |
Sbjct vagEPLP--VDSEK-----difDYIQWK----- 317
DSSP 111LLL--LLLH-----hhHLLL-----

```

```

DSSP hhhhhhhhhhh1111
Query avqrfvaridratkr 292
ident
Sbjct -----yrepkdrse 326
DSSP -----111hhhh111

```

No 343: Query=mol1A Sbjct=1mq3A Z-score=6.4

[back to top](#)

```

DSSP -----
Query ----- 0
ident -----
Sbjct tlnggitdmltelanfeknvsqaihkynayrkaasviakyphkiksgaeakklpgvgtki 60
DSSP 111hhhhhhhhhhhhhhhh111hhhhhhhhhhhhhhhh111111hhhhhh11111hh

```

```

DSSP -----111111111hh

```

```

ident
Sbjct aekideflatgklrklekirqddtsssinfltrvsgigpsaarkfvdegiktledlrkne 120
DSSP hhhhhhhhhhh111hhhhhhhh111hhhhhhhh111111hhhhhhhh11111hhhhhh11

DSSP hhhhhhhhhhh1111hhhhHHHHHHHHHHHHH-LLLL1111LLEEEHHHHHHHHhh11
Query slrdrltqvaerqgvfgrlqRHVAXIVVAQFAA-TLTDdtGAPLLLKGGSSLELrgi 71
ident |
Sbjct dklnhhqrigrkyfgdfekriPREEMLQMQDIVLnEVKKvdSEYIATVCGSFRRGA---- 176
DSSP 1111hhhhhhhh11hhhh1leEHHHHHHHHHHHHHHHHHH1LLEEEELHHHHLLL----

DSSP 1111LLEEEEEEEL-----1LHHHHHHHHHHHHhh111leeEEELLEEL111
Query pdsrTSKDFATVAR-----rDIELIHEQLADAGetgwegftAIFTAPEEaap 119
ident |
Sbjct ---eSSGMDVLLThpsftsestkqpkLLHQVVEQLQKVH-----FITDTLSKG--- 222
DSSP ---1EELLEEEEEE11lee11e1111HHHHHHHHHHHLL-----LEEEEEEEL---

DSSP 1111LLEEEEEEEL--LEEEEEEEL-LLLL1111eeeee1hhhh1111lee
Query gxpVKPRRFTAKLSYR--GRAFATVPIEVSSV-EAGNadqfdtlttsdalglvgvpaavav 176
ident |
Sbjct ---ETKFMGVCQLPSKndEKEYPHRRIDIRLIpKDQY----- 256
DSSP ---LLEEEEEE1111111111LLEEEEEEEL1HHHH-----

DSSP eellHHHHHHHHHHhh1111111111HHHHHHH-----hhhhh
Query pcxtiPWQIaqklhavtavleekandraHDLVDLQ-----llegl 217
ident |
Sbjct ----yCGVL-----yftgSDIFNKNmrahalekgftineytirplgtg 296
DSSP ----hHHHH-----hhh1LHHHHHHHHHHHHHHHleee1111ee1111

DSSP 11hHHHHHHHHHHHHhhhh1111111111HHHHHHH-----hhhhh
Query 1ldADLXptRSACIaifearaqhpWPPRVAtlphwplyagalegldhlelartvdaaaq 277
ident |
Sbjct vagEPLP--VDSEK-----difDYIQWK----- 317
DSSP 1111LLL--LLLHH-----hhhHLLL-----

DSSP hhhhhhhhhhh1111
Query avqrfvaridratkr 292
ident
Sbjct -----yrepkdrse 326
DSSP -----111hh111

```

No 344: Query=mol1A Sbjct=1zqsA Z-score=6.4

[back to top](#)

```

DSSP -----
Query ----- 0
ident
Sbjct etlnggitdmltelanfeknvsqaihkynayrkaasviakyphkiksgaeakklpgvgtk 60
DSSP 1111hhhhhhhhhhhhhhhh1111hhhhhhhhhhhhhhhh111111hhhhhh11111hh

DSSP -----1111111111h
Query -----aapyspsptnl 11
ident
Sbjct iaekideflatgklrklekirqddtsssinfltrvsgigpsaarkfvdegiktledlrkn 120
DSSP hhhhhhhhhhh1111hhhhhhhh11hhhhhhhh111111hhhhhhhh1111hhhhhh11

DSSP hhhhhhhhhhh1111hhhhHHHHHHHHHHHHH-LLLL1111LLEEEHHHHHHHHhh11
Query rslrdrltqvaerqgvfgrlqRHVAXIVVAQFAA-TLTDdtGAPLLLKGGSSLELrg 70
ident |
Sbjct edklnhhqrigrkyfgdfekriPREEMLQMQDIVLnEVKKvdSEYIATVCGSFRRGA--- 177
DSSP 11111hhhhhhhh11hhhh1leEHHHHHHHHHHHHHHHHHH1LLEEEEL1111111111---

DSSP 11111LLEEEEEEEL-----1LHHHHHHHHHHHHhh111leeEEELLEEL11
Query ipdsrTSKDFATVAR-----rDIELIHEQLADAGetgwegftAIFTAPEEaap 118
ident |
Sbjct ---eSSGMDVLLThpsftsestkqpkLLHQVVEQLQKVH-----FITDTLSKG-- 223
DSSP ---1EELLEEEEEE1111111111hhHHHHHHHHHHHLL-----LEEEEEEEL---

```

```

DSSP 1111LLEEEEEEEELL--EEEEEEEEEEEL-LLLL1111eeeeelhhh1111lee
Query pgxpVKPRRFTAKLSYRG--RAFATVPIEVSSV-EAGNadqfdtlttsdalglvgpaava 175
ident | |
Sbjct ---ETKFMGVCQLPSKNdeKEYPHRRIDIRLIpKDQY----- 257
DSSP ---LLEEEEEELLLLL11LLLLLEEEEEEEeLLLH-----

DSSP eeellhHHHHhhhhhh1111111111hhhhHHHHH-----
Query vpcxtiPWQIaqlhavlavleekandrahdlvDLQLE----- 215
ident | |
Sbjct -----yCGVL-----yftgSDIFNKmrahalekgftineytirp 292
DSSP -----hHHHH-----hh1LHHHHhhhhhh1leeeleeee

DSSP --hh11hhhhhhHHHHhhhh1111LLLLL1111hhhhhhhh11111111hh
Query --gllldadlxptrSACIaifearaqhpWPPRVatlpwplyagalegldhlelartvd 273
ident | |
Sbjct lgvtagvageplpvdSEKD-----ifdYIQWK----- 318
DSSP 111111111111LHHH-----hhhLLLL-----

DSSP hhhhhhhhhhh1111
Query aaaqavqrfvaridrskr 292
ident | |
Sbjct -----yrepkdrse 327
DSSP -----111hh111

```

No 345: Query=mol1A Sbjct=1zqhA Z-score=6.4

[back to top](#)

```

DSSP -----
Query ----- 0
ident | |
Sbjct etlnggitdmltelanfknvsqaihknayrkaasviakypkiksgaeakklpgvgtk 60
DSSP 1111hhhhhhhhhh1111hhhhhhhhhh111111hhhh11111hh

DSSP -----111111111h
Query -----aapyspntnl 11
ident | |
Sbjct iaekideflatgklrklekirqddtssinfltrvsgigpsaarkfvdegiktledlrkn 120
DSSP hhhhhhhhh1111hhhhhhhhhh11111hhhhhhhh1111hhhhhh1

DSSP hhhhhhhhhhh1111hhhhHHHHHHHHHHH-LLLL11LLEEEHHHHHHhh1
Query rslrdr1tqvaerqgvfgrlqRHVAXIVVAQFAA-TLTDdtGAPLLLVKGGSSLELrrg 70
ident | |
Sbjct edklnhhqriglkyfgdfekriPREEMLMQDIVLnEVKKvdSEYIATVCGSFRGA--- 177
DSSP hhh11hhhhhh11111111eEHHHHHHHHHHHHHHHH1LLEEEEEELLLLL---

DSSP 1111LLEEEEEEL-----1LHHHHHHHHHHHHhh1111eeEEELLEEL11
Query ipdsrTSKDFATVAR-----rDIELIHEQLADAGetgwegftAIFTAPEEIAa 118
ident | | | |
Sbjct ---eSSGDMDVLLThpsftsestqpkLLHQVVEQLQKVH-----FITDTLSKG-- 223
DSSP ---1EELLEEEEE111111111hhHHHHHHHHHHH-----LEEEEEEL--

DSSP 1111LLEEEEEEEELL--EEEEEEEEEEEL-LLLL1111eeeeelhhh1111lee
Query pgxpVKPRRFTAKLSYRG--RAFATVPIEVSSV-EAGNadqfdtlttsdalglvgpaava 175
ident | |
Sbjct ---ETKFMGVCQLPSKNdeKEYPHRRIDIRLIpKDQY----- 257
DSSP ---LLEEEEEELLLLL11LLLLLEEEEL1HHHH-----

DSSP eeellhHHHHhhhhhh1111111111hhhhHHHHH-----
Query vpcxtiPWQIaqlhavlavleekandrahdlvDLQLE----- 215
ident | |
Sbjct -----yCGVL-----yftgSDIFNKmrahalekgftineytirp 292
DSSP -----hHHHH-----hh1LHHHHhhhhhh1leeeleeee

DSSP --hh11hhhhhhHHHHhhhh1111LLLLL1111hhhhhhhh11111111hh
Query --gllldadlxptrSACIaifearaqhpWPPRVatlpwplyagalegldhlelartvd 273

```

Sbjct lgvvgvageplpvdsEKD-----IdfYIQWK----- 318  
DSSP 1111111111111111LHHH-----hhhHLLL-----

DSSP hhhhhhhhhhhhhhh1111  
Query aaaqavqrfvaridratkr 292  
ident  
Sbjct -----yrepkdrse 327  
DSSP -----111hhh111

No 346: Query=mol1A Sbjct=1zqjA Z-score=6.4

[back to top](#)

DSSP -----  
Query ----- 0  
ident  
Sbjct etlngitdmltelanfeknvsqaihkynayrkaasviakyphkiksgaeakklpgvgtk 60  
DSSP 1111hhhhhhhhhhhhhh1111hhhhhhhhhhhhhh1111111111hhhh11111hh

DSSP -----1111111111h  
Query -----aapyspsptnl 11  
ident  
Sbjct iaekideflatgklrklekirqddtssinfltrvsgigpsaarkfvdegiktledlrkn 120  
DSSP hhhhhhhhh1111hhhhhhhh1hhhhhhhh111111hhhhhhhh1111hhhhhh1

DSSP hhhhhhhhhhh1111hhhhHHHHHHHHHHHHH-LLLL11LLLEEEHHHHHHhh1  
Query rslrdrltqvaerqgvfgrlqRHVAXIVVAQFAA-TLTDdtGAPLLLKGGSSLELrrg 70  
ident  
Sbjct edklnhhqriglkygdfekriPREEMLMQDIVLnEVKKvdSEYIATVCGSFRGA--- 177  
DSSP hhh11hhhhhhhh1hhhh11LHHHHHHHHHHHHHHHHHH1LLEEEELLLLLL---

DSSP 1111LLLEEEEL-----1LHHHHHHHHHHHHhh1111eeEEELLEEL11  
Query ipdsrTSKDFATVAR-----rDIELIHEQLADAGetgwegftAIFTAPEEIaa 118  
ident  
Sbjct ---eSSGDMDVLLThpsftsestqpkLLHQVVEQLQKVH-----FITDTLSKG-- 223  
DSSP ---1LLEEEEEEe1111111111hhHHHHHHHHHHLL-----LEEEEL---

DSSP 1111LLLEEEEEEEL--EEEEEEEEEEEL-LLLL1111eeee1hhhh11111ee  
Query pgxpVKPRRFTAKLSYRG--RAFATVPIEVSSV-EAGNadqfdtltsdalglvgvpaava 175  
ident  
Sbjct ---ETKFMGVCQLPSKNdeKEYPHRRIDIRLIpKDQY----- 257  
DSSP ---LLEEEELLLLL1111111111LLEEEEEEeHHHH-----

DSSP ee11hHHHHhhhhhhhh1111111111hhhhHHHHHH-----  
Query vpcxtiPWQIaqklhavtavlepkandrahd1vDLQLE----- 215  
ident  
Sbjct ---yCGVL-----yftgSDIFNKnmrahalekgftineytirp 292  
DSSP ---hHHHH-----hh11LHHHHhhhhhhhh1leee1leeee

DSSP -hh11hhhhhhHHHHhhhhhh1111111111hhhhhhhh1111111111hh  
Query -glldadlxptRSACIaifearaqhpWPPRVAtlphwpliyagalegldhlelartvda 274  
ident  
Sbjct lgvvgvageplpvDSEK-----difDYIQWK----- 318  
DSSP 11111111111111LHH-----hhhHLLL-----

DSSP hhhhhhhhhhhhh1111  
Query aaaqavqrfvaridratkr 292  
ident  
Sbjct -----yrepkdrse 327  
DSSP -----111hhh111

No 347: Query=mol1A Sbjct=3hwtA Z-score=6.4

[back to top](#)





DSSP ILLLLEEEEEL-----1LHHHHHHHHHHHHhh1111eeeEELLEELL1111LLLE  
Query rTSKDFATVAR-----rDIELIHEQLADAGetgwegftaIFTAPEEIIAapgxPVKPR 126  
ident | | | | |  
Sbjct aTCGDVDVLIThpdgrshrgIFSRLDLSLRQEG-----FLTDDLVSQeengQQQKY 224  
DSSP 1EELEEEEEEL11111111LHHHHHHHHHHLL-----LEEEEEELL1111LLLEE

DSSP EEEEEEEE1EEEEEEEEEEEL-LLLL1111eeeee1hhh111111eeeee1hHHHH  
Query RFTAKLSYrgRAFATVPIEVSSV-EAGNadqfdtltsdalglvgvpaavavpcxtiPWQI 185  
ident | | | | |  
Sbjct LGVCRLPG--PGRRRRRLDIIIVpYSEF-----aCALL 255  
DSSP EEEELLL--LLLLLEEEEEEL1HHHH-----hHHHH

DSSP hhhhhhh1111111111HHHHHHH-----hhhhh1h  
Query aqklhavtavlepkandraHDLVDLQ-----llegl1ld 220  
ident | | | | |  
Sbjct -----yftgSAHFNRSmralaktkgmslsehalstavrnrthgakvpgg 299  
DSSP -----hhl1LHHHHHHHHhhhhh11lee111lee11ee1111lee11

DSSP HHHhhHHHHhhhhhh1111LLLLL11111hhhhhhhh1111111111hhhhhhhh  
Query ADLXptRSACIaifearaqhpWPPRVat1phwpliyagaleglhdhlelartvdaaaqavq 280  
ident | | | | |  
Sbjct RVLV--TPTEK-----dvfRLLGL----- 316  
DSSP EELL--LLLH-----hhHLL-----

DSSP hhhhhhh1111  
Query rfvaridrskr 292  
ident | | | | |  
Sbjct --pyrepaerdw 326  
DSSP --1111hhhh11

No 349: Query=mol1A Sbjct=2pfqA Z-score=6.4

[back to top](#)

DSSP -----  
Query ----- 0  
ident | | | | |  
Sbjct hnhiteklevlakaysvqgdkwralgyakainalksfhkpvttsyqeacsihgigkrmæ 60  
DSSP 11111hhhhhhhhhhhhhh111hhhhhhhhhhhhhh11111111hhhhhh1111hhhh

DSSP -----111111111hhhhhhh  
Query -----aapyspntnrslrdr 17  
ident | | | | |  
Sbjct kiieilesghlrklhdhisesvplvelfsniwgagtktaqmwyqgfrsledirsasltt 120  
DSSP hhhhhhh1111hhhh1111hhhhhhhh11111hhhhhhhh1111hhhhhhhh1111

DSSP hhhhhhh1111hhhhHHHHHHHHHHHHHHLL-LLLLLLLEEEHHHHHHHHhh11111L  
Query ltqaerqgvfgr1QRHVAXIVVAQFAATL-TDDTGAPLLLVKGGSSLELrrgipdsrT 76  
ident | | | | |  
Sbjct qqai9lkhysdflerMPREEATEIEQTQKAAQAFNSGLLCVACGSYRRGK-----aT 173  
DSSP hhhhhhh111hhhh11EEHHHHHHHHHHHHHHHHLLLLLLLEEEELHHHHLL-----1E

DSSP LLEEEEEEL-----1LHHHHHHHHHHHHhh1111eeeEELLEELL11111LLLEEE  
Query SKDFATVAR-----rDIELIHEQLADAGetgwegftaIFTAPEEIIAapgxPVKPRRF 128  
ident | | | | |  
Sbjct CGDQVDVLIThpdgrshrgIFSRLDLSLRQEG-----FLTDDLVSQeengQQQKYLG 224  
DSSP EEEEEEEE111111111LHHHHHHHHHHLL-----LEEEEEEL11111LLLEEE

DSSP EEEEE11EEEEEEEEEEEL-LLLL1111eeeee1hhh111111eeeee1hHHHHhh  
Query TAKLSYrgRAFATVPIEVSSV-EAGNadqfdtltsdalglvgvpaavavpcxtiPWQIa 187  
ident | | | | |  
Sbjct VCRLPG--PGRRRRRLDIIIVpYSEF-----aCALL-- 253  
DSSP EELLLL--LLLLLEEEEEEL1HHHH-----hHHHH--

DSSP hhhhhh1111111111HHHHHHH-----hhhhh1hHH







```

query  IIGADLARtrRSACIaItearaqnrwrrkvatipnwpliyagalegionieiarivdaaaq  211
ident  |
Sbjct  gpgRVLPT--PTEK-----dvfrLLGLPY----- 321
DSSP   11111111--LLHH-----hhhh111111-----

```

```

DSSP   hhhhhhhhhhh1111
Query  avqravaridratkr 292
ident  |
Sbjct  -----repaerdw 329
DSSP   -----11hhhh111

```

No 354: Query=mol1A Sbjct=3hx0A Z-score=6.4

[back to top](#)

```

DSSP   -----
Query  ----- 0
ident  |
Sbjct  sqkatnlnhiteklevlakaysvgdkwraagyakainalksfhkpvtsyqeacsipgi 60
DSSP   11111111hhhhhhhhhhhhhhhh1111hhhhhhhhhhhhhh11111111hhhh11111

```

```

DSSP   -----1111111111h
Query  -----aapyspntnl 11
ident  |
Sbjct  gkrmaekieielesghlrkldhisesvpvlelfsniwgagtktaqmwyqqgfrsledirs 120
DSSP   1hhhhhhhhhhhh1111hhhh1111hhhhhhhh111111hhhhhhhh11111hhhhhh

```

```

DSSP   hhhhhhhhhhh1111hHHHHHHHHHHHHHHHLL-LLLLLLEEEHHHHHHhh1
Query  rslrdr1tqvaerqgvfGRLQRHVAXIVVAQFAATL-TDDTGAPLLLVKGGSSLELrrg 70
ident  |
Sbjct  qasl1ttqqaiglkhydfLERMPREEATEIEQTVQKAaQAFNSGLLCVACGSYRRGK--- 177
DSSP   h1111hhhhhhhh1hhhhHLEEHHHHHHHHHHHHHHHHHHLLLEEEELHHHHLLL---

```

```

DSSP   11111LLEEEEL-----1LHHHHHHHHHHHHhh1111eeEEELLEEL1111L
Query  ipdsrTSKDFATVAR-----rDIELIHEQLADAGetgwegftAIFTAPEElaapgxP 122
ident  |
Sbjct  ----aTCGDVDVLIthpdrshrGIIFSRLDLSLRQEG-----FLTDDLVSQ-eengQ 224
DSSP   ----1EELEEEEEE11111111LHHHHHHHHHHH-----LLEEEEL-1111L

```

```

DSSP   LLEEEEEEEEEE11EEEEEEEEEEEL-LLLL1111eeeee1hhhh11111eeeee1h
Query  VKPRRFTAkLSYrgRAFATVPIEVSSV-EAGNadqfdt1tsdalglvgvpaavavpcxti 181
ident  |
Sbjct  QQKYLGVCRPLPG--PGRRRRLDIIVVpYSEF-----a 255
DSSP   LLEEEEEELLL--LLLLEEEEEEEL1LLH-----h

```

```

DSSP   HHHHhhhhhhhh1111111111HHHHHHH-----hhh
Query  PWQIaqklhavtavleekandraHDLVDLQ-----1leg 216
ident  |
Sbjct  CALL-----yftgSAAFNASmralaktkgmslsehalstavvrnthgak 299
DSSP   HHHH-----hhh1LHHHHHHhhhh1111ee11111ee11111e

```

```

DSSP   h11hHHHHhhHHHHhhhhhh1111LLLLL11111hhhhhhhh1111111111hhhh
Query  111dADLXptrSACIaifearaqhpWPPRVat1phwpliyagalegldhle1artvdaaa 276
ident  |
Sbjct  vpggRVLPT--TPTEK-----dvfrLLGL----- 320
DSSP   ee111111--LLHH-----hhHHHLL-----

```

```

DSSP   hhhhhhhhhhh1111
Query  qavqravaridratkr 292
ident  |
Sbjct  -----pyrepaerdw 330
DSSP   -----1111hhhh111

```

No 355: Query=mol1A Sbjct=5cb1A Z-score=6.4









No 359: Query=mol1A Sbjct=5iikA Z-score=6.4

[back to top](#)

```

DSSP -----
Query ----- 0
ident
Sbjct nnnlhiteklevlakaysvqgdkwralgyakainalksfhkpvtsyqeacsipgigkrma 60
DSSP 111hhhhhhhhhhhhhhhhhh111hhhhhhhhhhhhhhhh1111111hhhhhh1111hhhh

```

```

DSSP -----111111111hhhhhh
Query -----aapyspntnrslrd 16
ident
Sbjct ekiieilesghlrkldhisesvpvlelfsnigagtktaqmwyqqgfrsledirsqsalt 120
DSSP hhhhhhhhh111hhhh1111hhhhhhhh11111hhhhhhhh11111hhhhhhhh1111

```

```

DSSP hhhhhhh1111hhHHHHHHHHHHHHHHHLL-LLLLLLLLLEEEHHHHHHHHhh11111
Query rltqvaerqgvfgrLQRHVAXIVVAQFAATL-TDDTGAPLLLVKGGSSLELrrgipdsr 75
ident
Sbjct tqqaiglkhydsfIERMPREEATEIEQTVQKAaQAFNSGLLCVACGSYRRGK-----a 173
DSSP hhhhhhh111hhLLEEHHHHHHHHHHHHHHHLLLEEEELHHHHLLL-----l

```

```

DSSP LLLLEEEEL-----1LHHHHHHHHHHHHhh1111eeeEELLEELL1111LLLEE
Query TSKDFATVAR-----rDIELIHEQLADAGetgwegftaIFTAPEEIAapgxPVKPRR 127
ident
Sbjct TCGDVDVLIThpdgrshrgIFSRLDLSLRQEG-----FLTDDLVSQeengQQQKYL 224
DSSP EELLEEEEEE11111111HHHHHHHHHHHLL-----LEEEEEEELL1111LLEEE

```

```

DSSP EEEEEEE1EEEEEEEEEEELLLLL1111eeeeelhhhh11111111eeee1lhHHHHhh
Query FTAKLSYrgRAFATVPIEVSSVEAGNAdqfdtlttsdalglvgvpaavavpctiPWQIaq 187
ident
Sbjct GVCRLPG--PGRRHRLDIIIVPYSEF-----aCALL-- 254
DSSP EEELLLL--LLLLLEEEEEEELHHHH-----hHHHH--

```

```

DSSP hhhhh1111111111111111HHHHHHH-----hhhh11hHH
Query klhavtavleepkandraHDLVDLQ-----lleg111dAD 222
ident
Sbjct -----yftgSAHFNRSmralaktkgmslsehalstavrnrthgckvpgpRV 300
DSSP -----hhh1LHHHHHHhhhhhh11lee1111eeellee1111lee11EE

```

```

DSSP HHhhHHHHHHhhhhhh1111LLLLL1111hhhhhhhh1111111111hhhhhhhhhh
Query LXptRSACIaifearaqhpWPPRVAtpwhplyagaleglhdhlelartvdaaaqavqrf 282
ident
Sbjct LP--TPTEK-----dvrLLGLP----- 316
DSSP EL--LLLHH-----hhHHLLL-----

```

```

DSSP hhhhh1111
Query varidratkr 292
ident
Sbjct -yrepawdw 325
DSSP -111hh111

```

No 360: Query=mol1A Sbjct=4fh3A Z-score=6.3

[back to top](#)

```

DSSP 1111111111hhhhhhhhhhhh11LLHHHHHHHHHHHHHHHHHLL11111LLEEEE
Query aapyspntnrslrdrltqvaerqgVVFGRVAXIVVAQFAATLTddtgaPLLVK 60
ident
Sbjct -----shkeftkfcyevyeikiSDKEFKKRAALDTLRLCLKRIS-----PDAELV 47
DSSP -----11hhhhhhhhhhhh11LHHHHHHHHHHHHHHHHHLL-----LLEEE

```

```

DSSP HHhhhhhh11111111LLEEEEL--LLHHHHHHHHHHHHH1111eEEELLEEL11

```

```

ident
Sbjct AF--gslesglalknSDMDLVCVLMdsrVQSDTIALQFYEEELIAE----GFEGKFLQRA-- 99
DSSP EE--1hhhh11111111LEEEEEEL11LLHHHHHHHHHHHHHHHL----LEEEEEEEEL--

DSSP 11111LEEEEEEEEEELLE--EEEEEEEEEEe11111111leeeelhhhh1111leee
Query pgxpvKPRRFTAKLSYRGR--AFATVPIEVSSveagnadqfdtlttsdalglvgvpaavav 176
ident
Sbjct -----RIPIIKLTSDTKNGfgASFQCDIGFN----- 125
DSSP -----LEEEEEEEELLLL11LLLEEEEL-----

DSSP eel1hhhhhhHHHHHHh11111111LLLhHHHHHHHHHHh11hhhhhhhhhhhhhhhhhhhh
Query pcxtipwqiaQKLHAVtavleepkaNDRAhdldlqllegl1ldadlxptrsaciaifea 236
ident
Sbjct -----nr1aIHNTLL-----LSSY----- 139
DSSP -----1hhHHHHHH-----HHHH-----

DSSP h11111111111111LHHHhHHHHHL-1LLL-----1111LHHHHHH-
Query raqhpwprvatlpHWPLiYAGALE-gLDHL-----elarTVDAAAQ- 277
ident
Sbjct -----tkLDAR-LKPMVllvKHWAkrkqinspyfgtLssygyvlmVLYYLIVv 186
DSSP -----hhLLLL-HHHHHHhHHHHhh11111hh11111hhhhhhHHHHHHH1

DSSP -----
Query ----- 277
ident
Sbjct ikppvfpnllsplkqekivdgdvdfddkledippsqnysslgsl1hgffrfyaykfev 246
DSSP 1111111111111111leel1ee11111hh1111111111hhhhhhhhhhhhhh1111

DSSP ----hhHHHH--hhhhLLLL-----
Query ----avQRFV--aridRATKR----- 292
ident
Sbjct rekvvfFRFPdgyltkqEKGWTRYilaiedpfeishnvgtrtvssglyrirgefmaasrl 306
DSSP 111111LLL11111hhHLLL1111111111111111111111hhhh11hhhhhhhhhhhhhhhh

DSSP -----
Query ----- 292
ident
Sbjct lnsrsypipyds1feea 323
DSSP hh111111hhhh111

```

No 361: Query=mol1A Sbjct=4fh5A Z-score=6.3

[back to top](#)

```

DSSP 1111111111hhhhhhhhhhhh11LLHHHHHHHHHHHHHHHHHHLLL11111LEEEE
Query aapyspntnlrslrdrltqvaerqVVFGRQRHVAXIVVAQFAATLddtgaPLLVK 60
ident
Sbjct -----shkeftkfcyevyneikiSDKEFKKRAALDTRLRCLKRIS----PDAELV 47
DSSP -----1hhhhhhhhhhhh11LHHHHHHHHHHHHHHHHHHHHHL----LLEEE

DSSP HHHhhhhhh11111111LEEEEEEL--LHHHHHHHHHHHHHL11leEEELLEEL11
Query GGsslelrrgipdsrtsKDFATVAR--RDIELIHEQLADAGETGwegfTAIFTAPEEIaa 118
ident
Sbjct AF--gslesglalknsdMDLVCVLMdsrVQSDTIALQFYEEELIAE----GFEGKFLQRA-- 99
DSSP EE--1hhhh11111111LEEEEEEL11LLHHHHHHHHHHHHHHHL----LEEEEEEEEL--

DSSP 11111LEEEEEEEEEELLE--EEEEEEEEEEe11111111leeeelhhhh1111leee
Query pgxpvKPRRFTAKLSYRGR--AFATVPIEVSSveagnadqfdtlttsdalglvgvpaavav 176
ident
Sbjct -----RIPIIKLTSDTKNGfgASFQCDIGFN----- 125
DSSP -----LEEEEEEEELLLL11LLLEEEEL-----

DSSP eel1hhhhhhHHHHHHh11111111LLLhHHHHHHHHHHh11hhhhhhhhhhhhhhhhhhhh
Query pcxtipwqiaQKLHAVtavleepkaNDRAhdldlqllegl1ldadlxptrsaciaifea 236
ident
Sbjct -----nr1aIHNTLL-----LSSY----- 139
DSSP -----1hhHHHHHH-----HHHH-----

```

```

DSSP h111111111111LHHHhHHHHLL-LLLL-----1111LHHHHH-
Query raqhpwpprvatlpHWPLiYAGALEG-LDHL-----elarTVDAAAQ- 277
ident
Sbjct -----tkLDAR-LKPMVLLvKHWAKrkqinspyfgtLssygyvlmVLYYLIV 186
DSSP -----hhHLLL-HHHHHHHhHHHHhh1111hhh1111hhhhhhHHHHHHH1

DSSP -----
Query ----- 277
ident
Sbjct ikppvfpnlllsplkqekivdgfdvdfddkledippsqnysslgsllhgffrfyaykfe 246
DSSP 1111111111111111leel1ee11111hhh11111111hhhhhhhhhhhh1111

DSSP ---hhHHHH---hhhHLLL-----
Query ---avQRFV---aridRATKR----- 292
ident
Sbjct rekvvtfRRPdgyltkqEKGWTryilaiedpfeishnvgrtvsssglyrirgefmaasrl 306
DSSP 111111L1111111hhHLLL1111111111111111111111111111hhhhhhhhhhhhhh

DSSP -----
Query ----- 292
ident
Sbjct lnsrsypipydsifeea 323
DSSP hh1111111hhhh111

```

No 362: Query=mol1A Sbjct=4fhwA Z-score=6.3

[back to top](#)

```

DSSP 1111111111hhhhhhhhhhhh11LLHHHHHHHHHHHHHHHHHHLL11111LEEEE
Query aapyspntnlrslrdrltqvaerqVVFGRlQRHVAXIVVAQFAATLTddtgaPLLLVK 60
ident
Sbjct -----shkeftkfcyevyneikiSDKEFKKRAALDTLRLCLKRIS-----PDAELV 47
DSSP -----1hhhhhhhhhhhh11LHHHHHHHHHHHHHHHHHHLL-----LLEEE

DSSP HHHhhhhhh1111111LEEEEL--LLHHHHHHHHHHHHH111eEEELLLEEL11
Query GGsslelrrgipdsrtsKDFATVAR--RDIELIHEQLADAGETGwegfTAIFTAPEEIAa 118
ident
Sbjct AF--gslesglalknsdMDLCVLMdsrVQSDTIALQFYEELIAE---GFEGKFLQRA-- 99
DSSP EE--1hhhh1111111LEEEEL11LHHHHHHHHHHHHH-----LEEEEEEEL--

DSSP 11111LEEEEEEEELLE--EEEEEEEEEl11111111eeee1hhhh1111lee
Query pgxpvKPRRFTAKLSYRGR--AFATVPIEVSSveagnadqfdtlttsdalglvgvpaavav 176
ident
Sbjct -----RIPiIKLTSdTKNGfgASFQCDIGFN----- 125
DSSP -----LEEEEEEELLLL11LLLLEEEEL-----

DSSP eellhhhhhhHHHHHHh1111111LLLhHHhhhhhhhh11hhhhhhhhhhhhhhhh
Query pcxtipwqiaQKLHAVtavleepkaNDRAhdldlqllegllldadlxptrsaciaifea 236
ident
Sbjct -----nr1aIHNTLL-----LSSY----- 139
DSSP -----1hhHHHHHH-----HHHH-----

DSSP h111111111111LHHHhHHHHLL-LLLL-----1111LHHHHH-
Query raqhpwpprvatlpHWPLiYAGALEG-LDHL-----elarTVDAAAQ- 277
ident
Sbjct -----tkLDAR-LKPMVLLvKHWAKrkqinspyfgtLssygyvlmVLYYLIV 186
DSSP -----hhHLLL-HHHHHHHhHHHHhh1111hhh1111hhhhhhHHHHHHH1

DSSP -----
Query ----- 277
ident
Sbjct ikppvfpnlllsplkqekivdgfdvdfddkledippsqnysslgsllhgffrfyaykfe 246
DSSP 1111111111111111leel1ee11111hhh11111111hhhhhhhhhhhh1111

DSSP ---hhHHHH---hhhHLLL-----
Query ---avQRFV---aridRATKR----- 292

```

Sbjct REKVVTFRRRgyLRKQRGNHLYIIdateqpreIshnvglvSSsglyrIrigeImaasrl 306  
DSSP 111111LLLLL11111hhHLLL11111111111111111111111111111111111111111111hhhhhhhhhhhhhhhhhh

DSSP -----  
Query ----- 292  
ident  
Sbjct InrsypipydsIfeea 323  
DSSP hh111111hhhhhh111

No 363: Query=mol1A Sbjct=4fhvA Z-score=6.3

[back to top](#)

DSSP 1111111111hhhhhhhhhhhhhh11LLHHHHHHHHHHHHHHHHHHHLLL11111LLEEEE  
Query aapyspnpnlrslrdrftqvaerqgVVFGRQLQRHVAXIVVAQFAATLTddtgaPLLLVK 60  
ident | |  
Sbjct -----shkeftkfcyevyekiSDKEFKKRAALDTLRLCLKRIS-----PDAELV 47  
DSSP -----1hhhhhhhhhhhhhh11LHHHHHHHHHHHHHHHHHHHLLL-----LLEEEE

DSSP Hhhhhhhhh111111LLEEEEL--LHHHHHHHHHHHHHHL11leEEELLEEL11  
Query GGsslelrrgipdsrtsKDFATVAR--RDIELIHEQLADAGETGwegfTAIFTAPEEIIaa 118  
ident | | |  
Sbjct AF--gslesglalknsdMDLVCVLMdsrVQSDTIALQFYEELIAE---GFEGKFLQRA-- 99  
DSSP EE--1hhhh111111LEEEEEE111LHHHHHHHHHHHHHLL-----LEEEEEEEL--

DSSP 11111LLEEEEEEEEEELLE--EEEEEEEEEe11111111leeeelhhhh1111leee  
Query pgxpvKPRRFTAKLSYRGR--AFATVPIEVSSveagnadqfdtltsdalglvgvpaavav 176  
ident | |  
Sbjct ----RIPIIKLTSDTKNGfgASFQCDIGFN----- 125  
DSSP ----LEEEEEEELL111LLLEEEEL-----

DSSP ee1hhhhhhHHHHHH1111111LLLLhhhhhhhhhhhh11hhhhhhhhhhhhhhhh  
Query pcxtipwqiaQKLHAVtavleepkaNDRAhdldvlqllegl1ldadlxptrsaciaifea 236  
ident  
Sbjct -----nr1aIHNTLL-----LSSY----- 139  
DSSP ----1hhhhHHHHH-----HHHH-----

DSSP h1111111111111LHHHhHHHHHL--LLL-----1111LHHHHHH--  
Query raqhpwprvatlphWPLiYAGALEG-LDHL-----elarTVDAAAQ- 277  
ident  
Sbjct -----tkLDAR-LKPMVLLvKHWAkrkqinspyfgtlssygyvlmVLYLIHv 186  
DSSP -----hhLLL-HHHHHHHhHHHHhh11111hh1111hhhhhhHHHHHHH1

DSSP -----  
Query ----- 277  
ident  
Sbjct ikppvfpnllsplkqekivdvgfdvddkledippsqnysslgslhgfrrfyaykfp 246  
DSSP 1111111111111111leel1e11111hh11111111hhhhhhhhhhhhhh1111

DSSP ----hhHHHh--hhhhLLLL-----  
Query ----avQRfV--aridRATKR----- 292  
ident |  
Sbjct rekvvtFRRPdgyltkqEKGWTryilaiedpfeishnvrvtvsssglyriragefmaasrl 306  
DSSP 111111LLLLL11111hhHLLL11111111111111111111111111111111111111111111hhhh11hhhhhhhhhhhhhhhhhh

DSSP -----  
Query ----- 292  
ident  
Sbjct InrsypipydsIfeea 323  
DSSP hh111111hhhhhh111

No 364: Query=mol1A Sbjct=4p4oA Z-score=6.3

[back to top](#)

```

query -----aa 2
ident
Sbjct qemadlnnalgekykvsyyhklkkatkpklkaiqeltqvhgfgpraaaaldfregiftv 60
DSSP 1111hhhh1111hhhhhhhh11111111hhhhhhhh111111hhhhhhhhhh1111h

DSSP 1111111hhhhhhhhhhhh1111hhhhHHHHHHHHHHHH-LLLL-1LLLLLEEEE
Query pysspptnrslrdrltqvaerqgvvfgrlqRHVAXIVVAQFAA-TLTD-dTGAPLLLVK 60
ident |
Sbjct dellqkadsips1tdqqrvgikyfydinekiPMQESVLHENYLReKCMEv1GKDFSILIC 120
DSSP hhhhhhhhh1111hhhhhhhh1hhhh111eHHHHHHHHHHHHHHHHHHhLLEEEEEEL

DSSP HHHHHHHhh111111LLLLLEEEEEEL-----1LHHHHHHHHHHHHhh1111
Query GGSSLELrrgipdsrTSKDFATVAR-----rDIELIHEQLADAGetgweg 105
ident | | |
Sbjct GSYRRRH-----pFSGDVDAILSrtdapplsepvaatgVLGHFVEFLESK----- 167
DSSP HHHHLLL-----1EELLEEEEEe1111111111hhhh1HHHHHHHHHHLL-----

DSSP eeeEELL-LEEL111111LLLLLEEEEEEE-EEEL-LEEEEEEEEEEEEL-LLLL1111eeee
Query ftaIFTA-PEEIaapgxvKPRRFATAK-LSYR-GRAFATVPIEVSSV-EAGNadqfdtlt 161
ident |
Sbjct ---YLEAtMAQG-----PLKYMGMGR1PPRInTKVYKARRVDIRLLeTKSV----- 210
DSSP ---LEEEeEEL-----LLEEEEEEL1LLL1LLLLLEEEEEEEEE1HHHH-----

DSSP elhhh111111eellhHHHHhhhhhh1111111111HHHHHHHHhhhh1lh
Query sdalglvgvpaavavpctiPWQIaqlhavtavleepkandraHDLVDLQ1leg11lda 221
ident
Sbjct -----pTAML-----tftgSKNFNVI--mrqaais 233
DSSP -----hHHHH-----hh1LHHHHHH--hhhhhhh

DSSP hhhhhhHHHH-----hHHHH--1111L
Query dlxptrsACIA-----iFEAR--aqhpwP 243
ident | |
Sbjct kgyl1neYGLFklgtpeearalyerigirknagelgvpkdeledkrVEVRseqdvfdV 293
DSSP 1leeeleLEEe111hhhhhhhhhh11111111leellelhhhh1leELLL1hhhhhhH

DSSP LLLL1111hhhhhhhh1111111111hhhhhhhhhhhhhhhh1111
Query PRVAtlphwpliyagaleglhdhlarlvdaaaqvqrfvaridratkr 292
ident
Sbjct LGMP-----yakpenrdp 306
DSSP LLLL-----111hh111

```

No 365: Query=mol1A Sbjct=1bpxA Z-score=6.3

[back to top](#)

```

DSSP -----
Query ----- 0
ident
Sbjct kapqetlnggitdmltelanfeknvsqaihknayrkaasviakyphkiksgaeakklpg 60
DSSP 1111hhhhhhhhhhhhhhhh1111hhhhhhhhhhhhhh111111hhhhhh1111

DSSP -----111111
Query -----aapysp 7
ident
Sbjct vgtkiaekideflatgklrklekirqddtssinfltrvsgigpsaarkfvdegiktled 120
DSSP 1hhhhhhhhhhhh111hhhhhh11hhhhhhhhhh1111hhhhhhhh1111hh

DSSP 111hhhhhhhhhhhh1111hhhhHHHHHHHHHHHH-LLLL11LLLLLEEEHHHHHH
Query ptnrslrdrltqvaerqgvvfgrlqRHVAXIVVAQFAA-TLTDdtGAPLLLKGGSSLE 66
ident | |
Sbjct IrknedklnhhqriglkyfgdfekriPREEMLMQDIVLnEVKKvdSEYIATVCGSFRRG 180
DSSP hhl1hh11hhhhhhhhhh111eHHHHHHHHHHHHHHHHHH1LLEEEEELLLLLL

DSSP Hhh11111LLLLLEEEEEEL-----1LHHHHHHHHHHHHhh1111eEEELLLE
Query LrrgipdsrTSKDFATVAR-----rDIELIHEQLADAGetgwegftAIFTAPE 114
ident | | |
Sbjct A-----eSSGDMDVLLThpsftsestkpqkLLHQVVEQLQKVH-----FITDTLS 225

```

DSSP E11111111LLEEEEEEEEEEL--LEEEEEEEEEEEEL-LLLL1111leeee1hhhh1111  
Query EiaapgxVKPRRFTAKLSYR--GRAFATVPIEVSSV-EAGNadqfdtltsdalglvgvp 171  
ident | |  
Sbjct K-----gETKFMGVCQLPSKndEKEYPHRRIDIRLIpKDQY----- 261  
DSSP E-----1LLEEEEEELLLL1111LLEEEEEEEEeHHHH-----

DSSP 1leeee11hHHHHhhhhhhhh1111111111HHHH-----hhh  
Query aavavpcxtiPWQIaqklhavtavleekandraHDLV-----dlq 212  
ident |  
Sbjct -----yCGVL-----yftgSDIFnknmrahalekgftineytirp 296  
DSSP -----hHHHH-----hhhlHHHHhhhhhhhh1lee1111lee

DSSP hhhhh11hhHHHHhhHHHHhhhh1111L1111hhhhhhhh1111111111h  
Query l1eg11ldaDLXPTrSACIAifearaqhWPPRvat1phwpliyagalegldhlelartv 272  
ident |  
Sbjct lgvtgvagePLPV--DSEKD-----ifdYIQWK----- 322  
DSSP 1111111111L11L--LLHHH-----hhhHLLL-----

DSSP hhhhhhhhhhhhh1111  
Query daaaqavqrvaridratkr 292  
ident |  
Sbjct -----yrepkdrse 331  
DSSP -----111hh111

No 366: Query=mol1A Sbjct=7ic1A Z-score=6.3

[back to top](#)

DSSP -----  
Query ----- 0  
ident |  
Sbjct etlnggitdmltelanfeknvsqaihkyayrkasviakypkiksgaeakklpgvgtk 60  
DSSP 1111hhhhhhhhhhhhhh1111hhhhhhhhhhhhhh111111hhhh111111hh

DSSP -----1111111111h  
Query -----aapyspsptnl 11  
ident |  
Sbjct iaekideflatgklrklekirqddtsssinfltrvsgigpsaarkfvdegiktledlrkn 120  
DSSP hhhhhhhhh1111hhhhhhhhhhhhhh111111hhhhhhhh11111hhhhhh1

DSSP hhhhhhhhhhh1111hhhhHHHHHHHHHHHH--L1111LLEEEHHHHHHhh1  
Query rsldr1rtqvaerqgvfgrlQRHVAXIVVAQFAA-TLTDdtGAPLLLVKGSSELElrrg 70  
ident | |  
Sbjct edklnhhqriglkyfgdfekriPREEMLQMDIVLnEVKkVdSEYIATVCGSFRFGA--- 177  
DSSP hhh11hhhhhhhh11hhhh1leEHHHHHHHHHHHHhhHHHh1LLEEEEEELLLL---

DSSP 1111LLEEEEEEEL-----1LHHHHHHHHHHhh1111eeEELLEEL11  
Query ipdsrTSKDFATVAR-----rDIELIHEQLADAGetgwegftAIFTAPEEIaa 118  
ident | | || |  
Sbjct ---eSSGDMDVLLThpsftsestkpLHQQVVEQLKQVH-----FITDTLSKG-- 223  
DSSP ---1EELLEEEEEEe1111111111hHHHHHHHHHHLL-----LEEEEEEEL---

DSSP 1111LLEEEEEEEEEELL--EEEEEEEEEEEL-LLLL1111leeee1hhhh1111lee  
Query pgxpVKPRRFTAKLSYR--RAFATVPIEVSSV-EAGNadqfdtltsdalglvgvpaava 175  
ident | |  
Sbjct ---ETKFMGVCQLPSKndEKEYPHRRIDIRLIpKDQY----- 257  
DSSP ---LLEEEEEELLLL111LLEEEEEEEEeHHHH-----

DSSP ee11hHHHHhhhhhh1111111111hhhhHHHHHH-----  
Query vpcxtiPWQIaqklhavtavleekandrahdlvDLQLE----- 215  
ident |  
Sbjct -----yCGVL-----yftgSDIFNKnmrahalekgftineytirp 292  
DSSP -----hHHHH-----hh11LHHHHhhhhhhhh1lee1111lee

DSSP -hh11hhhhhhHHHHhhhhhh1111L1111hhhhhhhh1111111111hh





```

DSSP -----
Query ----- 0
ident
Sbjct etlnggitdmltelanfeknvsqaihkynayrkaasviakypkiksgaeakklpgvgtk 60
DSSP 1111hhhhhhhhhhhhhhhh1111hhhhhhhhhhhhhhhh111111hhhhh11111hh

DSSP -----111111111hh
Query -----aapyspntl 11
ident
Sbjct iaekideflatgklrklekirqddtssinfltrvsgigpsaarkfvdegiktledlrkn 120
DSSP hhhhhhhhh1111hhhhhhhhhhhhhhhh111111hhhhhhhhhh1111hhhhhh1

DSSP hhhhhhhhhhh1111hhhhhhHHHHHHHHHHHH-LLLL11LLLEEEHHHHHHhh1
Query rslrdrltqvaerqgvfgrlqRHVAXIVVAQFAA-TLTDdtGAPLLLKGGSSLELrrg 70
ident | |
Sbjct edklnhhqriglkygdfekriPREEMLMQDIVLnEVKKvdSEYIATVCGSFRGA--- 177
DSSP hhh11hhhhhhhh1hhhhhh1eHHHHHHHHHHHHHHHHHH1LLEEEELLLLLL---

DSSP 1111LLLEEEEL-----1LHHHHHHHHHHHHhh1111eeEEELLEEL11
Query ipdsrTSKDFATVAR-----rDIELIHEQLADAGetgwegftAIFTAPEEIaa 118
ident | | | |
Sbjct ---eSSGDMDVLLThpsftsestkqpkLLHQVVEQLQKVH-----FITDTLSKG-- 223
DSSP ---1EELLEEEEEEe1111111111hhHHHHHHHHHHLL-----LEEEEEEEL--

DSSP 1111LLLEEEEEEEL--EEEEEEEEEEEL-LLLL1111eeee1hhhh11111ee
Query pgxpVKPRRFTAKLSYRG--RAFATVPIEVSSV-EAGNadqfdtltsdalglvgvpaava 175
ident | |
Sbjct ---ETKFMGVCQLPSKNdeKEYPHRRIDIRLIpKDQY----- 257
DSSP ---LLEEEEEEELLLLL11LLLEEEEEEeHHHH-----

DSSP ee11hHHHHhhhhhhhh1111111111hhhhHHHHHH-----
Query vpcxtiPwQIaqlhavlavepkandrahdlvDLQLE----- 215
ident
Sbjct ---yCGVL-----yftgSDIFNKnmrahalekgftineytirp 292
DSSP ---hHHHH-----hh11LHHHHhhhhhhhh1leee1leeee

DSSP --hh11hhhhhhhhHHHHhhhhhh1111LLLL11111hhhhhhhh111111111hh
Query --g11ldadlxptrSACIaifearaqhpPPRVatlpwplyagalegldhlelartvd 273
ident |
Sbjct lgvtgvageplpvdSEKD-----ifdYIQWK----- 318
DSSP 111111111111LHHH-----hhhLLLL-----

DSSP hhhhhhhhhhhhh1111
Query aaaqavqrfvaridrskr 292
ident
Sbjct -----yrepkdrse 327
DSSP -----111hh111

```

No 369: Query=mol1A Sbjct=1mq2A Z-score=6.3

[back to top](#)

```

DSSP -----
Query ----- 0
ident
Sbjct tlnggitdmltelanfeknvsqaihkynayrkaasviakypkiksgaeakklpgvgtki 60
DSSP 111hhhhhhhhhhhhhhhh111hhhhhhhhhhhhhhhh111111hhhhh11111hh

DSSP -----111111111hh
Query -----aapyspntlr 12
ident
Sbjct aekideflatgklrklekirqddtssinfltrvsgigpsaarkfvdegiktledlrkne 120
DSSP hhhhhhhhh1111hhhhhhhhhhhhhhhh111111hhhhhhhhhh1111hhhhhh1h

DSSP hhhhhhhhhhh1111hhhhhhHHHHHHHHHHHH-LLLLLLLLEEEHHHHHHhh11
Query slrdrltqvaerqgvfgrlqRHVAXIVVAQFAA-TLDDTGAPLLLKGGSSLELrri 71

```

```
Sbjct  GKKTHHMQIIGKAYIGUEKIIRREEMEQMDYIHEVAVYDSEIIEIYCGGFRRA  110
DSSP  hhh11hhhhhhhh1hhhhhh1111HHHHHHHHHHHHhhHHHHHLLLEEELHHHLLL----

DSSP  1111LLLEEEEEEL-----1LHHHHHHHHHHHHhh1111eeEEELLEEL111
Query  pdsrTSKDFATVAR-----rDIELIHEQLADAGetgwegftAIFTAPEEIIaap  119
ident  | | | | | | | | | | | | | | | | | | | | | | | | | |
Sbjct  ---eSSGDMDVLLThpsftsestkqpkLLHQVVEQLQKVH-----FITDTLSKG---  222
DSSP  ---1LLLEEEEEEL111111111111HHHHHHHHHHHLL-----LEEEEEEL---

DSSP  1111LLLEEEEEEEEEEL--EEEEEEEEEEEEEL-LLLL1111eeeeelhhhh1111lee
Query  gxpVKPRRFATAKLSYRG--RAFATVPIEVSSV-EAGNadqfdt1tsdalglvgvpaavav  176
ident  | | | | | | | | | | | | | | | | | | | | | | | | | |
Sbjct  ---ETKFMGVCQLPSKNdeKEYPHRRIDIRLIpKDQY-----  256
DSSP  ---LLEEEEEELLLLL111LLLEEEEEEL1111H-----

DSSP  eel1hHHHHhhhhhhhh111111111111hhhhHHHHHH-----
Query  pcxtiPWQIaqlhavtavleepkandrahd1vDLQLE-----  215
ident  | | | | | | | | | | | | | | | | | | | | | | | | | |
Sbjct  ----yCGVL-----yftgSDIFNKmrahalekgftineytirpl  292
DSSP  ----hHHHH-----hhh1LHHHHhhhhhhhhhhlee1111lee1

DSSP  hhh1hhhhhhhhHHHHHHhhhh1111LLLLL1111hhhhhhhh11111111hhhh
Query  glldadlxptRSACIAifearaqhpWPPRVat1phwpliyagalegldhleartvdaa  275
ident  | | | | | | | | | | | | | | | | | | | | | | | | | |
Sbjct  gvtgvageplpVDSEKD-----ifDYIQW-----  316
DSSP  111111111111LLHHH-----hhLLLL-----

DSSP  hhhhhhhhhhh1111
Query  aqavqrfvaridratkr  292
ident  | | | | | | | | | | | | | | | | | | | | | | | | | |
Sbjct  -----kyrepkdrse  326
DSSP  -----1111hhh111
```

No 370: Query=mol1A Sbjct=1zqmA Z-score=6.3

[back to top](#)

```
DSSP -----
Query -----  0
ident -----
Sbjct  etlnggitdmltelanfeknvsqaihknayrkaasviakypkiksgaeakk1pgvgtk  60
DSSP  1111hhhhhhhhhh1111hhhhhhhhhhhhhh111111hhhh111111hh

DSSP -----1111111111h
Query  -----aapyspptnl  11
ident  | | | | | | | | | | | | | | | | | | | | | | | | | |
Sbjct  iaekideflatgklrklekirqddtsssinfltrvsgigpsaarkfvdegiktledlrkn  120
DSSP  hhhhhhhhh1111hhhhhhhh1hhhhhhhhhh111111hhhhhhhh1111hhhhhhhh1

DSSP  hhhhhhhhhhh1111hhhhHHHHHHHHHHHHH-LLLL11LLLEEEHHHHHHhh1
Query  rslrdr1tqvaerqgvfgrlqRHVAXIVVAQFAA-TLTDdtGAPLLLKGGSSLELrrg  70
ident  | | | | | | | | | | | | | | | | | | | | | | | | | |
Sbjct  edklnhhqrigkyfgdfekriPREEMLQMDIVLnEVKKvdSEYIATVCGSFRFGA---  177
DSSP  hhh11hhhhhhhh1hhhh11eEHHHHHHHHHHHHHHHHLLLEEELLLLLLLL---

DSSP  1111LLLEEEEEEL-----1LHHHHHHHHHHHHhh1111eeEEELLEEL11
Query  ipdsrTSKDFATVAR-----rDIELIHEQLADAGetgwegftAIFTAPEEIIa  118
ident  | | | | | | | | | | | | | | | | | | | | | | | | | |
Sbjct  ---eSSGDMDVLLThpsftsestkqpkLLHQVVEQLQKVH-----FITDTLSKG--  223
DSSP  ---1EELLEEEEEEL1111111111hhHHHHHHHHHLL-----LEEEEEEL---

DSSP  1111LLLEEEEEEEEEEL--EEEEEEEEEEEEEL-LLLL1111eeeeelhhhh1111lee
Query  pgxpVKPRRFATAKLSYRG--RAFATVPIEVSSV-EAGNadqfdt1tsdalglvgvpaava  175
ident  | | | | | | | | | | | | | | | | | | | | | | | | | |
Sbjct  ---ETKFMGVCQLPSKNdeKEYPHRRIDIRLIpKDQY-----  257
DSSP  ---LLEEEEEELLLLL111LLLEEEEEELLLLH-----
```

DSSP eeeL#####  
Query vpcxtiPWQIaqlhavlavleekandrahdlvDLQLE----- 215  
ident  
Sbjct -----yCGVL-----yftgSDIFNKnmrahalekgftineytirp 292  
DSSP -----hHHHH-----hh1LHHHHHHhhhhhhhh1leee1leee

DSSP -hh1lhhhhhhHHHHHHhhhhhh1111LLLLL11111hhhhhhhh111111111hh  
Query -gllldadlxprSACIaifearaqhpWPPRVatlphwpliyagalegdhlelartvda 274  
ident  
Sbjct lgvtgvageplpVDSEK-----difDYIQW----- 317  
DSSP 111111111111LLHH-----hhhHLLL-----

DSSP hhhhhhhhhhhhh1111  
Query aaqavqrfvaridratkr 292  
ident  
Sbjct -----kyrepkdrse 327  
DSSP -----1111hh111

No 371: Query=mol1A Sbjct=8icfA Z-score=6.3

[back to top](#)

DSSP -----  
Query ----- 0  
ident  
Sbjct etlnggitdmltelanfeknvsqaihkynayrkaasviakypkiksgaeakklpgvgtk 60  
DSSP 1111hhhhhhhhhhhhhh1111hhhhhhhhhhhh11111111hhhhh11111hh

DSSP -----111111111h  
Query -----aapyspsptnl 11  
ident  
Sbjct iaekideflatgklrklekirqddtssinfltrvsgigpsaarkfvdegiktledlrkn 120  
DSSP hhhhhhhhh1111hhhhhhhhhhhhhh111111hhhhhhhh11111hhhhhh1

DSSP hhhhhhhhhhh1111hhhhHHHHHHHHHHHH-LLLL11LLLEEEHHHHHHhh1  
Query rslrdrltqvaerqgvfgrlqRHVAXIVVAQFAA-TLTDdtGAPLLLKGGSSLELrrg 70  
ident  
Sbjct edklnhhqriglkygfdfekriPREEMLQMQDIVLnEVKKvdSEYIATVCGSFRGA--- 177  
DSSP hhh1lhhhhhhhhhh1leEHHHHHHHHHHHHHHH1LLEEEELLLLLLL---

DSSP 11111LLLEEEEL-----1LHHHHHHHHHHHHhh1111eeEEELLEEL11  
Query ipdsrTSKDFATVAR-----rDIELIHEQLADAGetgwegftAIFTAPEEIaa 118  
ident  
Sbjct ----eSSGDMDVLLThpsftsestqpkLLHQVVEQLQKVH-----FITDTLSKG-- 223  
DSSP ----LEELLEEEEEEe1111111111hHHHHHHHHHHLLL-----LEEEEEEEL--

DSSP 1111LLLEEEEEEEL--EEEEEEEEEEEL-LLLL1111eeee1hhhh11111ee  
Query pgxpVKPRRFTAKLSYRG--RAFATVPIEVSSV-EAGNadqfdtltsdalglvgvpaava 175  
ident  
Sbjct ----ETKFMGVCQLPSKNdeKEYPHRRIDIRLIpKDQY----- 257  
DSSP ----LEEEEEEELLLLL11LLLLLEEEEEEELLLH-----

DSSP ee1lHHHHHhhhhhhhh1111111111hhhhHHHHHH-----  
Query vpcxtiPWQIaqlhavlavleekandrahdlvDLQLE----- 215  
ident  
Sbjct -----yCGVL-----yftgSDIFNKnmrahalekgftineytirp 292  
DSSP -----hHHHH-----hh1LHHHHHHhhhhhhhh1leee11leee

DSSP --hh1lhhhhhhhhHHHHhhhhhh1111LLLLL11111hhhhhhhh111111111hh  
Query --gllldadlxprSACIaifearaqhpWPPRVatlphwpliyagalegdhlelartvd 273  
ident  
Sbjct lgvtgvageplpvdSEKD-----ifdYIQWK----- 318  
DSSP 111111111111LHHH-----hhhHLLL-----

DSSP hhhhhhhhhhhhh1111  
Query aaqavqrfvaridratkr 292  
ident

No 372: Query=mol1A Sbjct=2bcuA Z-score=6.3

[back to top](#)

|       |                                                                        |     |
|-------|------------------------------------------------------------------------|-----|
| DSSP  | -----                                                                  |     |
| Query | -----                                                                  | 0   |
| ident |                                                                        |     |
| Sbjct | tnhnlhiteklevlakaysvqgdkwralgyakainalksfhkpvtsyqeacsipgigkrm           | 60  |
| DSSP  | 1111111111hhhhhhhhhhhh111hhhhhhhhhhhhhhhhhh1111111111hhhhhh111111hh    |     |
|       |                                                                        |     |
| DSSP  | -----1111111111hhhhh                                                   |     |
| Query | -----aapyspptnlrslr                                                    | 15  |
| ident |                                                                        |     |
| Sbjct | aekieielesghlrkldhisesvpvlelfsniwgagtktaqmwyyqqgfrsleldirsqasl         | 120 |
| DSSP  | hhhhhhhhhh111hhhhhh11111hhhhhhhhhh111111hhhhhhhhhh11111hhhhhhhh111     |     |
|       |                                                                        |     |
| DSSP  | hhhhhhhhhh11111hhhhHHHHHHHHHHHHHHLL-LLLLLLLLLEEEHHHHHHHHhh11111        |     |
| Query | drltqvaerqgvvfrlQRHVAXIVVAQFAAT-LTDDTGAPLLLKGGSSLELrrgipds             | 74  |
| ident |                                                                        |     |
| Sbjct | ttqqaiglkhysdflerMPREREATEIEQTVQkaAQAFNSGLLCVACGSYRRGK-----            | 173 |
| DSSP  | 1hhhhhhhh111hhhh11EEHHHHHHHHHHHHHHHHHHLLLLEEEELHHHHLLL-----            |     |
|       |                                                                        |     |
| DSSP  | 1111111111-----1LHHHHHHHHHHHHhh1111eeEELLEELL1111111111L               |     |
| Query | rTSKFATVAR-----rDIELIHEQLADAGetgwegftaIFTAPEEIAapgxPVKPR               | 126 |
| ident |                                                                        |     |
| Sbjct | aTCGDVDVLIThpdgrshrgrIFSRLLDLSLRQEG-----FLTDDLVSQeengQQQKY             | 224 |
| DSSP  | 1EELLEEEEEE1111111111LHHHHHHHHHHHLL-----LEEEEEELL1111111111LEE         |     |
|       |                                                                        |     |
| DSSP  | EEEEEEEEE11EEEEEEEEEEEL-LLL1111111111111111111111111111111111111111    |     |
| Query | RFTAKLSYrgRAFATVPIEVSSV-EAGNadqfdtltssdalglvgvpaavavpctxtiPWQI         | 185 |
| ident |                                                                        |     |
| Sbjct | LGVCRLPG--PGRRHRLDIIVVpYSEF-----aCALL                                  | 255 |
| DSSP  | EEEELLL--LLLLEEEEEEEEL1HHHH-----hHHHH                                  |     |
|       |                                                                        |     |
| DSSP  | hhhhhhhh111111111111111111111111111111111111111111111111111111         |     |
| Query | aqklhavtavlepekndraHDLVDLQ-----llegl1ld                                | 220 |
| ident |                                                                        |     |
| Sbjct | -----yftgSAHFNRSmralaktkgmslsehalstavrnrthgckvgpg                      | 299 |
| DSSP  | -----hhlLHHHHHHHHhhhhhhhh1111111111111111111111111111111111111111      |     |
|       |                                                                        |     |
| DSSP  | HHHHhhHHHHhhhhhh111111111111111111111111111111111111111111111111111111 |     |
| Query | ADLXpRSACIaifearaqhpWPPRVatlphwpliyagalegldhlelar tvdaaaqavq           | 280 |
| ident |                                                                        |     |
| Sbjct | RVLP--TPTEK-----dvfRLLGL-----                                          | 316 |
| DSSP  | EELL--LLLHH-----hhHHLLL-----                                           |     |
|       |                                                                        |     |
| DSSP  | hhhhhhhh1111                                                           |     |
| Query | rfvaridratkr 292                                                       |     |
| ident |                                                                        |     |
| Sbjct | --pyrepaerdw 326                                                       |     |
| DSSP  | --1111hhhh111                                                          |     |

No 373: Query=mol1A Sbjct=2ihmA Z-score=6.3

[back to top](#)

|       |                                                                      |    |
|-------|----------------------------------------------------------------------|----|
| DSSP  | -----                                                                |    |
| Query | -----                                                                | 0  |
| ident |                                                                      |    |
| Sbjct | smpayacrpsplthhntllsealetlaeaagfeanegrllsfsraasvklslpcpvasl          | 60 |
| DSSP  | 11111hhhh111111111111hhhhhhhhhhhhhhhhhh111hhhhhhhhhhhhhhhhhh1111111h |    |
|       |                                                                      |    |
| DSSP  | -----                                                                |    |

```
ident
Sbjct sqlhglpyfgehstrviqellehggtceevkqvrcseryqtmklftqvfgvgvktanrwyq 120
DSSP hhh1111111hhhhhhhhhhhhhhhh111hhhhhhhhhhhhhhhhhh111111hhhhhhhhhh

DSSP -111111111hhhhhhhhhhhhhhhh111hhhhhHHHHHHHHHHHHHHL-LLLL1LLLEE
Query -aapyspntlrslrdrltqvaerqgvvfgrrlqRHHVAXIVVAQFAAT-LTDDtGAPLL 58
ident
Sbjct eglrtldelreqprltqqkagllqyyqdlstpvRRADAELQQLIEAAVRQT1PGATVT 180
DSSP 11111hhhhhh111111hhhhhhhh1hhhhh1leEHHHHHHHHHHHHHHHL1LLLEEE

DSSP EEHHHHHHHHhh111111LLLEEEEL-----1LHHHHHHHHHHHHhh111leeeEE
Query VKGSSLELrrgipdsrTSKDFATVAR-----rDIELIHEQLADAGetgwegftaIF 110
ident
Sbjct LTGGFRRGK-----1QGHVDVFLIthpeegqevgLLPKVMSCLQSQG-----LV 224
DSSP ELHHHHL111-----1EELEEEEEE11111111HHHHHHHHHHHL-----LE

DSSP LLEELLLL111LLLEEEEEEEEE11EEEEEEEEEEEL-LLLL111leeeelhhhh11
Query TAPEEIAAPgxpVKPRRFTAKLSYrgRAFATVPIEVSSV-EAGNadqfdtltsdalglvg 169
ident
Sbjct LYHQYHRSH-dvFERSFCILGLPQ--PTWKAVRVDLVVTpSSQF----- 265
DSSP EEEEEELL-11LEEEEEEEEL--LLEEEEEEEEL1LLLH-----

DSSP 111leeeel1hHHHHHHhhhhhh1111111111HHHHHHH-----
Query vpaavavpctiPWQIAQklhavravleekandraHDLVDLQ----- 212
ident
Sbjct -----PFALLG-----wtgSQFFERE1rrfsrqekglwlnshg 298
DSSP -----HHHHHH-----hh1LHHHHHHhhhhhhhh1lee1111

DSSP -hhhhh1hhhhhhHHHHHHhhhhhh11111111111hhhhhhhh1111111111
Query -llegl1ldadlxPTRSAciaifearaqhpwprvatlphwpliayagaldhlelart 271
ident
Sbjct lfdpeqkrvfhatSEEDV----- 316
DSSP ee1111111111LHHHH-----

DSSP hhhhhhhhhhhHHHH---hh1111
Query vdaaaqavqrfVARI---dratkr 292
ident
Sbjct -----fr1LGLKylppeqrna 332
DSSP -----hhhLLL111hhhh11
```

No 374: Query=mol1A Sbjct=1xspA Z-score=6.3

[back to top](#)

```
DSSP -----
Query ----- 0
ident
Sbjct atnhnlhiteklevlakaysvqgdkwralgyakainalksfhkpvtsyqeacsipigkr 60
DSSP 11111hhhhhhhhhhhhhhhhhh11hhhhhhhhhhhhhhhhhh111111hhhhhh11111hh

DSSP -----1111111111hhhh
Query -----aapyspntlrsl 14
ident
Sbjct maekiieilesghlrkldhisesvpvlelfsniwgagtktaqmwyqqgfrslelrsqas 120
DSSP hhhhhhhhhhh1111hhhh1111hhhhhhhh111111hhhhhhhh11111hhhhhhhh11

DSSP hhhhhhhhh1111hHHHHHHHHHHHHHHL-LLLLLLLEEEHHHHHHHHhh1111
Query rdrltqvaerqgvvfgRLQRHVAXIVVAQFAATL-TDDTAPLLLVKGGSSLELrrgipd 73
ident
Sbjct lttqqaiglkhsdf1ERMPREEATEIEQTVQKAAQAFNSGLLCVACGSYRRGK----- 174
DSSP 1hhhhhhhh111hhLLEEHHHHHHHHHHHHHHHL1LLLEEEELHHHHHL-----

DSSP 11LLLEEEEL-----1LHHHHHHHHHHHHhh111leeeEELLEELL1111LLL
Query srTSKDFATVAR-----rDIELIHEQLADAGetgwegftaIFTAPEEIAapxpVKP 125
ident
Sbjct -aTCGDVDVLIthpdgrshrgIFSRLDLSLRQEG-----FLTDDLVSQeengQQQK 224
DSSP -1EELLEEEEEE111111111LHHHHHHHHHHHL-----LEEEEEEELL1111LLE
```

```

DSSP EEEEEEE1EEEEEEEEEEELLLL1111eeeeelhhhh111111eeeeellhHHHH
Query RRFtAKLSYrgRAFATVPIEVSSVEAGNadqfdtlttsdalglvgvpaavavpcxtiPWQI 185
ident | |
Sbjct YLGVCR LPG--PGRRRRRLDIIVVPYSE-----faCALL 256
DSSP EEEEELLL--LLLLEEEEEEELHHH-----hhHHHH

DSSP hhhhhhhh111111111111HHHHHH-----hhhhhllh
Query aqklhavtavleekandraHDLVDLQ-----llegl1ld 220
ident |
Sbjct -----yftgSAHFNRSmralaktkgmslsehalstavvrnthgakvgpg 300
DSSP -----hhhlLHHHHHHhhhhhh11lee111lee1lee1111lee11

DSSP HHHHhHHHHHHhhhh1111LLLLL1111hhhhhhhh11111111hhhhhhhh
Query ADLXptRSACIaifearaqhpWPPRVatlphwpliyagalegl dhlelartvdaaaqavq 280
ident |
Sbjct RVL P--TPTEK-----dvfRLLGL----- 317
DSSP EELL--LLLH-----hhHLLL-----

DSSP hhhhhhhh1111
Query rfvaridratkr 292
ident |
Sbjct --pyrepaerdw 327
DSSP --1111hhhh111

```

No 375: Query=mol1A Sbjct=2bcsA Z-score=6.3

[back to top](#)

```

DSSP ----- 0
Query -----
ident |
Sbjct hnlhiteklevlakaysvgqdkwralgyakainalksfhkpvtsyqeacsipgigkrmae 60
DSSP 11hhhhhhhhhhhhhh11hhhhhhhhhhhhhh111111hhhhhh11111hhhhhh

DSSP -----111111111hhhhhhh
Query -----aapyspntlrsldr 17
ident |
Sbjct kiieilesghlrkldhisesvpvlelfsniwgagtktaqmwyqqgfrsleldirsqasltt 120
DSSP hhhhhhh111hhhh1111hhhhhhhh11111hhhhhhhh1111hhhhhh1111h

DSSP hhhhhh1111hhHHHHHHHHHHHHHHLL--LLLLLLEEEHHHHHHhh11111L
Query ltqvaerqgvvfgrLQRHVXIVVAQFAATL--TDDTGAPLLLVKGGSSLELrrgipdsrT 76
ident | | |
Sbjct qqai glkhsdf1ERMPREEATEIEQTVQKAAQAFNSGLLCVACGSYRRGK-----aT 173
DSSP hhhhhh111hhLLEEHHHHHHHHHHHHHHHLLLEEEELHHHHLL-----1E

DSSP LLEEEEL-----1LHHHHHHHHHHHHhh1111eeEELLEELL1111LLEEE
Query SKDFATVAR-----rDIELIHEQLADAGetgwegftaIFTAPEEIAapgxPVKPRRF 128
ident | | |
Sbjct CGDVDVLIThpdgrshrgIFSRLLDSL RQEG-----FLTDDLVSQeengQQQKYL G 224
DSSP EEEEEEE11111111LHHHHHHHHHHLL-----LEEEELL1111LLEEE

DSSP EEEEE1EEEEEEEEEEELLLL1111eeeeelhhhh111111eeeeellhHHHHhh
Query TAKLSYrgRAFATVPIEVSSVEAGNadqfdtlttsdalglvgvpaavavpcxtiPWQIa q 188
ident | |
Sbjct VCRLPG--PGRRRRRLDIIVVPYSE-----faCALL--- 253
DSSP EELLLL--LLLLEEEEEEELHHH-----hhHHHH---

DSSP hhhh111111111111HHHHHH-----hhhhhllHHH
Query lhavtavleekandraHDLVDLQ-----llegl1ldADL 223
ident |
Sbjct -----yftgSAHFNRSmralaktkgmslsehalstavvrnthgckvgpgRVL 300
DSSP -----hhhlLHHHHHHhhhhhh11lee111lee1lee1111lee11EEL

DSSP HhHHHHHHhhhh1111LLLLL1111hhhhhhhh11111111hhhhhhhhhh
Query XptRSACIaifearaqhpWPPRVatlphwpliyagalegl dhlelartvdaaaqavqrfv 283

```







DSSP LLL11111hhhhhhhhhh1111111111hhhhhhhhhhhhhhhhhh1111  
Query PRVat1phwpliyagaleglhdhlelartvdaaaqavqrfvaridratkr 292  
ident  
Sbjct LGL-----pyrepaerdw 245  
DSSP LLL-----1111hhhh11

No 379: Query=mol1A Sbjct=4xusa Z-score=6.3

[back to top](#)

DSSP -----  
Query ----- 0  
ident  
Sbjct hnlhiteklevlakaysvqgdkwralgyakainalksfhkpvtysqeacsipegigkrmae 60  
DSSP 1111hhhhhhhhhhhhhhhh11hhhhhhhhhhhhhhhh111111hhhhhh11111hhhh

DSSP -----111111111hhhhhh  
Query -----aapyspntnlrslrdr 17  
ident  
Sbjct kiieilesghlrkldhisesvpvlelfsniwgagtktaqmwyqqgfrsledirsqsaltt 120  
DSSP hhhhhhh111hhhh1111hhhhhhhh11111hhhhhhhh11111hhhhhhhh1111h

DSSP hhhhhhh1111hhhhHHHHHHHHHHHHHHL-LLLL1LLEEEEEEHHHHHHhh11111L  
Query ltqvaerqgvvfgrlQRHVAXIVVAQFAAT-LTDDtGAPLLLKGGSSLELrrgipdsrT 76  
ident | | | | |  
Sbjct qqai glkhysdflerMPREEATEIEQTVQKaAQAFnSGLLCVACGSYRRGK-----aT 173  
DSSP hhhhhhh1hhhh11EEHHHHHHHHHHHHHHHHH1LLEEEELHHHHLL-----1E

DSSP LLEEEEL-----1LHHHHHHHHHHHHhh1111eeeEELLEELL1111LLEEE  
Query SKDFATVAR-----rDIELIHEQLADAGetgwegftaIFTAPEEIAapgxPVKPRRF 128  
ident | | | | |  
Sbjct CGDVDVLIThpdgrshrgIFSRLDLSLRQEG-----FLTDDLVSQeengQQQKYL 224  
DSSP ELLEEEEEE11111111HHHHHHHHHHHLL-----LEEEEEE11111LLEEE

DSSP EEEEE11EEEEEEEEEEEL-LLLL1111leeeelhhhh11111leeeelhhHHHHh  
Query TAKLSYrgRAFATVPIEVSSV-EAGNadqfdtltsdalglvgvpaavavpctiPWQIa 187  
ident | | | | |  
Sbjct VCRLPG--PGRRRRLDIIVpYSEF-----aCALL-- 253  
DSSP EELLLL--LLLLLEEEEEEEL1HHHH-------hHHHH--

DSSP hhhhh1111111111HHHHHHH-----hhhh11hHHH  
Query klhavgavlepkandraHDLVDLQ-----1leg11dADL 223  
ident | | | | |  
Sbjct -----yftgSAHFNRSmralaktkgmslsehalsstavvrnhgckvgpgRVL 299  
DSSP -----hh1LHHHHHHhhhhhhhh11lee111lee111111111111EEL

DSSP HhhHHHHhhhhhh1111LLELL11111hhhhhhhh1111111111hhhhhhhhhh  
Query XptRSACIaifearaqhpWPPRVat1phwpliyagaleglhdhlelartvdaaaqavqrfv 283  
ident  
Sbjct P--TPTEK-----dvfRLLGL-----p 314  
DSSP L--LLLHH-----hhHHLLL-----1

DSSP hhhhh1111  
Query aridratkr 292  
ident  
Sbjct yrepaerdw 323  
DSSP 111hhhh111

No 380: Query=mol1A Sbjct=4x5vA Z-score=6.3

[back to top](#)

DSSP -----  
Query ----- 0

```

Sbjct mhhhhhtekreviakaysvqgukwialgyakamaikyqeaCSipgigkimaeklrele 00
DSSP 111hhhhhhhhhhhhhhhh111hhhhhhhhhhhhhh111hhhh11111hhhhhhhhhhhh

DSSP -----111111111hhhhhhhhhhhhhh 24
Query -----aapyspntnlrslrdrltqvaer
ident
Sbjct sghlrkldhisesvvpvlelfsniwgagtktaqmwyqqgfrsleldirsqaslttqqaiglk 120
DSSP 1111hhhh11111hhhhhhhhhh11111hhhhhhhhhh11111hhhhhhhh11111hhhhhhhh

DSSP 1111hHHHHHHHHHHHHHHHLL-LLLLLLLLLEEEHHHHHHHHhh11111LLLLLEEEE 83
Query qgvvfGRLQRHVAXIVVAQFAATL-TDDTGAPLLLKGGSSLELrrgipdsrTSKDFATV
ident
Sbjct hysdf1ERMPREEATEIEQTVQKAaQAFNSGLLCVACGSYRRGK-----aTCGDVDVL 173
DSSP 1hhhhLLEEHHHHHHHHHHHHHHHLLLEEEELHHHHLLL-----1EELLEEEEE

DSSP EL-----1LHHHHHHHHHHHHhh1111eeeEELLEELL11111LLLLLEEEEEEEEE1 135
Query AR-----rDIELIHEQLADAGetgwegftaIFTAPEEIAapgxPVKPRRFTAKLSYr
ident
Sbjct IThpdgrshrgIFSRLDSLRLQEG-----FLTDDLVSQeengQQQKYLGVCRPLG- 223
DSSP EE111111111HHHHHHHHHHHLL-----LEEEEEEELL11111LLLLLEEEEEELL-

DSSP 1EEEEEEEEEEELL111111111111111111111111111111111111111111111 195
Query gRAFATVPIEVSSVEAGNAdqfdtlttsdalglvgvpaavavpcxtiPWQIaqlhavlav
ident
Sbjct -PGRRRRLDIIVVPYSEF-----aCALL----- 246
DSSP -LLLLLEEEEEEELHHHH-----hHHHH-----

DSSP 1111111111HHHHHHH-----hhhh11hHHHHhHHHH 230
Query leepkandraHDLVDLQ-----1leg11ldADLXptRSAC
ident
Sbjct -----yftgSAHFNRSmalaktkgmslsehalstavrnrthgckvpgRVLV--TPTE 298
DSSP -----hhh1LHHHHHHhhhhhh11lee1111ee11ee111111ee11EELL--LLLH

DSSP Hhhhhhh111111111111111111111111111111111111111111111111111 290
Query IaifearaqhpWPPRVatlpwhpliyagaleglhdhlearvtdaaaqavqrfrvaridrat
ident
Sbjct K-----dvfRLLGL-----pyrepaer 315
DSSP H-----hhhHHHLL-----1111hhhh

DSSP 11
Query kr 292
ident
Sbjct dw 317
DSSP 11

```

No 381: Query=mol1A Sbjct=5ddyE Z-score=6.3

[back to top](#)

```

DSSP -----111111111hhhhhhhhhhhhhh1111hHHHHHHHH 37
Query -----aapyspntnlrslrdrltqvaerqgvvfGRLQRHVA
ident
Sbjct vpvlelfsniwgagtktaqmwyqqgfrsleldirsqaslttqqaiglkhysdfLERMPREE 60
DSSP 1hhhhhh111111hhhhhhhhhh1111hhhhhh11111hhhhhhhhhhhhLLEEHHH

DSSP HHHHHHHHHLL-LLLLLLLLLEEEHHHHHHhh11111LLLLLEEEEL-----1LH 88
Query XIVVAQFAATL-TDDTGAPLLLKGGSSLELrrgipdsrTSKDFATVAR-----rDI
ident
Sbjct ATEIEQTVQKAaQAFNSGLLCVACGSYRRG-----KATCGDVDVLIThpdgrshrgIF 113
DSSP HHHHHHHHHHHHHHLLLEEEELLLLL-----LEEELEEEEEE111111111HH

DSSP HHHHHHHHHHHhh1111111111111111111111111111111111111111111111 146
Query ELIHEQLADAGetgwegftaIFTAP--EEIAApXPVKPRRFTAKLSYrgRAFATVPIEV
ident
Sbjct SRLDSLRLQEG-----FLTDD1vSQEEN--GQQKYLGVCRPLG--PGRRRRLDI 160
DSSP HHHHHHHHHLL-----LLLLEeLLLEE--LEEEEEEELL--LLLLLEEEEE

```

```

DSSP LLL LLLLLLLLSEEEELHMMMMHLLLSEEEELHMMMMMMMMMMMMMMMMMMMMMMMMMMMMMMMM
Query SSV-EAGNadqfdtltsdalglvgvpaavavpcxtiPWQIaqlkhavtavleepkandra 205
ident |
Sbjct IVVpYSEF-----aCALL-----yftg 177
DSSP EEL1LLLH-----hHHHH-----hhhl

DSSP HHHHHHH-----hHHhh1lhhhhhhHHHHHHhhhhhh111L
Query HDLVDLQ-----lleg1ldadlxptRSACIaifearaqhW 242
ident
Sbjct SAHFNRSmralaktkgmslsehalstavrnthgckvgpgrvlpTPTEK-----dvrR 230
DSSP LHHHHHHhhhhhhhhleeel11lee111111111111111111ee1LLLHH-----hhhH

DSSP LLLLL1111hhhhhhhh1111111111hhhhhhhhhhhhhh1111
Query PPRVAtlphwplyagaleglhdhlelartvdaaaqavqrfvaridratkr 292
ident
Sbjct LLGLP-----yropaerdw 244
DSSP HLLL-----l11hhhh11

```

No 382: Query=mol1A Sbjct=1xslA Z-score=6.2

[back to top](#)

```

DSSP -----
Query ----- 0
ident
Sbjct atnhnlhiteklevlakaysvqgdkwralgyakainalksfhkpvtsyqeacsipgigkr 60
DSSP 11111hhhhhhhhhhhhhh11hhhhhhhhhhhhhh111111hhhhhh1111hh

DSSP -----l11111111hhhh
Query -----aapyspptnrs1 14
ident
Sbjct maekiiieilesghlrkldhisvplelfsniwgagtktaqmwyqqgfrsle dirsqas 120
DSSP hhhhhhhhhhh11hhhh11111hhhhhhhh111111hhhhhhhh11111hhhhhh11

DSSP hhhhhhhhh1111hHHHHHHHHHHHHHHHLL--LLLL1LLEEEHHHHHHhh111
Query rdrltqvaerqgvvfgRLQRHVAXIVVAQFAATL--TDDTgAPLLLKGGSSLELrrgip 72
ident | |
Sbjct lttqqaiglkhydfLERMPREATEIEQTVQKAaqAFNS-GLLCVACGSYRRGK----- 174
DSSP 11hhhhhhhh1hhhhHLLLEHHHHHHHHHHHHhhLLL-LLEEEELHHHHLLL-----

DSSP 111LLEEEEEEEL-----lLHHHHHHHHHHHHhh111leeEELLE-ELL11LLL
Query dsrTSKDFATVAR-----rDIEIHEQLADAGetgwegftAIFTAPE-EIAApGXPV 123
ident | | |
Sbjct --aTCGDVDVLIThpdgrshrGIFSRLDLSLRQEG-----FLTDDLvsQEEN--GQQ 222
DSSP --1EELLEEEEEE11111111LHHHHHHHHHLL-----LEEEEEeEEEE--LLE

DSSP LLEEEEEEEL11EEEEEEEEEEEL-LLLL1111eeeee1hhhh11111eeee1hH
Query KPRRFTAKLSYrgRAFATVPIEVSSV-EAGNadqfdtltsdalglvgvpaavavpcxtiP 182
ident | |
Sbjct QKYLGVCRCLPG--PGRRHRLDIIIVVpYSEF-----aC 253
DSSP EEEEEELLLL--LLLLLEEEEEEEL1HHHH-----hH

DSSP HHHhhhhhhhh1111111111HHHHHHH-----hhhhh
Query WQIaqlkhavtavleepkandraHDLVDLQ-----llegl 217
ident
Sbjct ALL-----yftgSAHFNRSmralaktkgmslsehalstavrnthgckv 297
DSSP HHH-----hhh1LHHHHHHhhhhhh11lee111lee1111111111

DSSP 11hHHHHhhHHHHhhhh111LLLL11111hhhhhhhh1111111111hhhhhh
Query 1ldADLXptRSACIaifearaqhWPPrvatlphwplyagaleglhdhlelartvdaaa 277
ident |
Sbjct gpgRVLp--TPTEKD----vfrLLGLP----- 318
DSSP 111LLL--LLHHH----hhHLLL-----

DSSP hhhhhhhhh1111
Query avqrfvaridratkr 292
ident

```



```

ident
Sbjct ydinekiPMQESVLHENYLReKCMEvlgKDFSILICGSYRRR-----HPFSGDVDAIL 113
DSSP hhh111eEHHHHHHHHHHHHHHHHHH11LEEEELHHHHLL-----LLEELLEEEEE

DSSP L-----1LHHHHHHHHHHHHhh1111eeEEELLEE111111LLEEEEE
Query R-----rDIELIHEQLADAGetgwegftAIFTAPEEiaapgxPKPRRFT 129
ident
Sbjct SrtldapplsepvaatgVLGHFVEFLESK-----YLEATMAQ-----gPLKYMGM 159
DSSP Ee1111111111hhhh1HHHHHHHHHHLL-----LEEEEEE-----1LLEEEEE

DSSP EEEEL--LEEEEEEEEEEEEL-LLLL1111eeeee1hhhh111111eeeee1hHHHHh
Query AKLSYR--GRAFATVPIEVSSV-EAGNadqfdt1tsdalglvgvpaavavpcxtiPWQIa 186
ident
Sbjct GRLPPRinTKVYKARRVDIRLIeTKSV-----pTAML- 191
DSSP ELLLLL11LLLLLEEEEEE1HHHH-----hHHHH-

DSSP hhhhhhh1111111111HHHH-----
Query qklhavantleepkandraHDLV----- 209
ident
Sbjct -----tftgSKNFvimirqaaiskgyllneyglfklgtpeearalyerig 236
DSSP -----hhh1LHHHHhhhhhhhh1leeeelleee11hhhhhhhhhh1

DSSP -----hhhhhhhh11hhHHHHhhHHHHhhhhhh11LLLLL11111hhhhhhhh1
Query -----dlqllegl1ldaDLXPtrSACIaifearaqhPWPPRvatlphwpliyagale 261
ident
Sbjct irgknageelgvpkdeledkRVEV--RSEQ----dvfdVLGMP----- 273
DSSP 111111ee1leehhh11LLLL--LHH-----hhhHLLL-----

DSSP 1111111111hhhhhhhhhhhhhh1111
Query gldhlelartvdaaaqavqrfrvaridratkr 292
ident
Sbjct -----yakpenrdp 282
DSSP -----111hh111

```

No 385: Query=mol1A Sbjct=4yd2A Z-score=6.2

[back to top](#)

```

DSSP -----
Query ----- 0
ident
Sbjct mpayacqrptplthntglsealeilaeaagfegsegrlltfcraasvkalpsvttls 60
DSSP 1111hhhh11111111hhhhhhhhhhhhhh11hhhhhhhhhhhhhh111111hh

DSSP -----
Query ----- 0
ident
Sbjct qlqglphfgehssrvvqellehgvcceeverrrseryqtmklftqifgvvktadrwyre 120
DSSP hh111111hhhhhhhhhhhh11hhhhhhhh1hhhhhhhhhh111111hhhhhhhh1

DSSP 1111111111hhhhhhhhhhhh111hhhhHHHHHHHHHHHHLLLL-11LLEEEE
Query aapyspntnlrsldr1tqvaerqgvfgrlqRHVAXIVVAQFAATLTD-dtGAPLLV 59
ident
Sbjct glrtldd1reqpkl1tqqkag1qhhd1stpvLRSDVDALQQVVEEAVGqalPGATVTL 180
DSSP 1111hhhh11hh11hhhhhhhh1hhhh111eEHHHHHHHHHHHHHHhh1LLEEEEE

DSSP EHHHHHHhh1111LLLLLEEEEL-----1LHHHHHHHHHHHHhh1111eeEEL
Query KGGSSLElrrgipdSRTSKDFATVAR-----rDIELIHEQLADAGetgwegftAIFT 111
ident
Sbjct TGGFRRG-----KLQGHVDVFLIThpkegqeagLLPRVMCRLQDQG-----LIL 224
DSSP LHHHLL-----LLEELLEEEEEE11111111LHHHHHHHHHHLL-----LEE

DSSP LLe11111111LLEEEEEEELLeEEEEEEEEEL-LLLL1111eeeee1hhhh111
Query APe1iaapgxPKPRRFTAKLSYRGRaFATVPIEVSSV-EAGNadqfdt1tsdalglvgv 170
ident
Sbjct YH-----ERSFCIFRLPQPGS-WKAVRVLDLVVApVSQF----- 256
DSSP EL-----LEEEEEEELLE-EEEEEEEEEL1LLH-----

```

DSSP 111eEEEE11hHHHHhhhhhhhh1111111111HHHH-----hHHH  
 Query paavavpcxtiPWQIaqlhvtavleepkandraHDLV-----dlql 214  
 ident |  
 Sbjct -----pFALL-----gwtgSKLFqrelrrfrsrekgwlnshgl 290  
 DSSP -----hHHHH-----hhh1LHHHHhhhhhhhhhh1lee11111e

DSSP hhh1lhhHHHHhhHHHHhhhh111L111111hhhhhhhh1111111111hHH  
 Query eg11ldaDLXpTRsACIaifearaqhPWPPRvatlphwpliayaglegldh1elartvda 274  
 ident |  
 Sbjct fdpeqktFFQA--ASEED----ifRHLGLE----- 314  
 DSSP ee1111eELL--LLHHH-----hhhHLLL-----

DSSP hhhhhhhhhhhhh11111  
 Query aaqavqrFvaridratkr 292  
 ident |  
 Sbjct -----ylppeqrna 323  
 DSSP -----111hh111

No 386: Query=mol1A Sbjct=4k4iA Z-score=6.2

[back to top](#)

DSSP ----- 0  
 Query -----  
 ident -----  
 Sbjct tnhnlhiteklevlakaysvgdkwralgyakainalksfhkpvtstyqeacsiPigkrm 60  
 DSSP 1111hhhhhhhhhhhhhh111hhhhhhhhhhhhhh111111hhhhhh1111hh

DSSP -----111111111hHHH  
 Query -----aapyspPTnrlsrlr 15  
 ident -----  
 Sbjct aekiieilesghlrkldhisesvPvlelfsniwagtgtaqmwYqgfrsleDirsqas1 120  
 DSSP hhhhhhhhh111hhhh1111hhhhhhhh111111hhhhhhhh1111hhhhhh111

DSSP hhhhhhhhh1111hHHHHHHHHHHHHHHHHHLL-LLLLLLLLEEEEHHHHHHHH11111  
 Query drltqvaerqgVvFGLRQrhVAXIVVAQFAATL-TDDTGAPLLLKGGSSLELrRgipds 74  
 ident | | |  
 Sbjct ttqqaiglkysdfLERMPREEATEIEQTVQKAaQAFNSGLLCVACGSYRRGK----- 173  
 DSSP 1hhhhhhhh1hhhhHLEEEHHHHHHHHHHHHHHHLLLLLLLEEEELHHHLL-----

DSSP 1LLLLEEEEEL-----1LHHHHHHHHHHHHhh1111eeeEELLEELL1111L1111LLE  
 Query rTSKDFATVAR-----rDIELIHEQLADAGetgwegftaIFTAPEEIAapgxPVKPR 126  
 ident | | | |  
 Sbjct aTCGDVDVLIThpdgrshrGIFSRLLDSLRLQEG-----FLTDDLVSQeengQQQKY 224  
 DSSP 1EELLEEEEEE1111111111HHHHHHHHHHHLL-----LEEEEEEEL1111L111LEE

DSSP EEEEEEE11EEEEEEEEEELL1111111111eEEelhHHH1111111111eEEel1hHHHHh  
 Query RFTAKLSYrgrAFATVPIEVSSVEAGNadqfdt1tsdalglvypaavavpcxtiPWQIa 186  
 ident | |  
 Sbjct LGVCRLPG--PGRRRRLDIIVPYSE-----faCALL- 255  
 DSSP EEEEEEL--L11LEEEEEEELHHH-----hhHHHH-

DSSP hhhhhhh1111111111HHHHHHH-----hHHh11hH  
 Query qklhvtavleepkandraHDLVDLQ-----1leg111dA 221  
 ident -----  
 Sbjct -----yftgSAHFNRSmralaktkgms1sehalstavrnrthgckvpgpR 300  
 DSSP -----hhh1LHHHHHHhhhhhh111ee111111111111111111111111111111

DSSP HHHhhHHHHhhhh1111L1111111hhhhhhhh11111111L1111HHhhhhhhhh  
 Query DLXpTRsACIaifearaqhPWPPRvatlphwpliayaglegldh1eLARTVDaaavqvr 281  
 ident | |  
 Sbjct VLP--TPTEK-----dVfRLLGL-----pyrepaerdwLEHHHH----- 332  
 DSSP EEL--LLLH-----hhhHLLL-----1111hh111L1111L111111111111111111

DSSP hhhhhhh1111  
 Query fvaridratkr 292

Sbjct " 333  
DSSP -----1

No 387: Query=mol1A Sbjct=5ddyA Z-score=6.2

[back to top](#)

DSSP -1111111111hhhhhhhhhhHHLL-----  
Query -aapyspptnlrslrdrltqvaERQG----- 26  
ident  
Sbjct atnhnlhiteklevlakaysvqgDKWRAlgyakainalksfhkpvtsyqeacsipgigkr 60  
DSSP 11111hhhhhhhhhhhhhhhh1LHHHHhhhhhhhhhh111111hhhhhh111111

DSSP -----  
Query ----- 26  
ident  
Sbjct maekiieilesghlrklhdhisesvpvlelfsniwgagtktaqmwyqqgfrsleldirsqas 120  
DSSP hhhhhhhhh1111111hhhhhhhhhh111111hhhhhhhhhh111hhhhhh111

DSSP -----1hHHHHHHHHHHHHHHHLL-LLLLLLLEEEHHHHHHhh1111  
Query -----vfvGRLQRHVAXIVVAQFAATL-TDDTGAPLLLVKGGSSLELrrgipd 73  
ident  
Sbjct lttqqaiglkhysdfLERMPREEATEIEQTVQKAaQAFNSGLLCVACGSYRRGK----- 174  
DSSP 1hhhhhhhh1hhhhLLEHHHHHHHHHHHLLLLLLLEEEELLLLLL-----

DSSP 1LLLLLEEEEL-----1LHHHHHHHHHHHHhh1111eeEELL--EELL11LLL  
Query srTSKDFATVAR-----rDIELIHEQLADAGetgwegftaIFTAP--EEIAApgXPV 123  
ident  
Sbjct -aTCGDVDVLIThpdgrshrGIFSRLDLSLRQEG-----FLTDD1vSQUEEN--GQQ 222  
DSSP -1EELLEEEEEE11111111HHHHHHHHHHHLL-----LEEEeeEEEEE--LLE

DSSP LLEEEEEEEL1EEEEEEEEEEEL-LLLL1111eeee1hhhh11111111eeee1hh  
Query KPRRFTAKLSYrgRAFATVPIEVSSV-EAGNadqfdtltsdalgvgvpaavavpextiP 182  
ident  
Sbjct QKYLGVCRLLPG--PGRRRRLDIIIVpYSEF-----aC 253  
DSSP EEEEEEEELL--LLLLLEEEEEEEL1LLH-----hh

DSSP HHHhhhhhhhh1111111111HHHHHH-----hhhh  
Query WQIaqklhavtavleepkandraHDLVDLQ-----llegl 217  
ident  
Sbjct ALL-----yftgSAHFNRSmralaktkgmslsehalstavrnrthgckv 297  
DSSP HHH-----hhh1LHHHHHHhhhh111111eeel111eeel111111lee

DSSP 1hHHHHhhHHHHhhhh1111LLLLL1111hhhhhhhh1111111111hhhhhh  
Query lldADLXptRSACIaifearaqhpWPPRVAtlphwpliyagaleldhlelartvdaaaq 277  
ident  
Sbjct gpgRVLP--TPTEK-----dvfRLLGLP----- 318  
DSSP e11LLL--LLLHH-----hhHHLLLL-----

DSSP hhhhhhhhh1111  
Query avqrfvaridratkr 292  
ident  
Sbjct -----yrepawrdw 327  
DSSP -----111hh111

No 388: Query=mol1A Sbjct=4xrhB Z-score=6.2

[back to top](#)

DSSP -----1111111111hhhhhhhhhhhh1111hHHHHH  
Query -----aapyspptnlrslrdrltqvaergvfvGRLQR 34  
ident  
Sbjct sesvpvlelfsniwgagtktaqmwyqqgfrsleldirsqaslttqqaiglkhysdfLERMP 60  
DSSP 1hhhhhhhh111111hhhhhhhh1111hhhhhh1111hhhhhhhh111hhhhLLEE

```

Query  HVAIVVAQFAATL-TDDTGAPLLLVKGGSSLELrrgipdsrTSKDFATVAR 34
ident  | | | | |
Sbjct  REEATEIEQTVQKaaQAFNSGLLCVACGSYRRGK-----aTCGDVDVLIThpdgrshr 113
DSSP  HHHHHHHHHHHHHHhHLLLLLLEEEELHHHHLL-----1EELLEEEEE11111111

DSSP  1LHHHHHHHHHHHHh1111eeEEELLEELL1LLLLLLEEEEEEE11EEEEEEEE
Query  rDIELIHEQLADAGetgwegftAIFTAPEEIAApGXPVKPRRFTAKLSYrgRAFATVPIE 145
ident  | | | | |
Sbjct  gIFSRLLDSLREQE-----FLTDDLVSQEE-nGQQQKYLVCRLPG--PGRRHRLD 162
DSSP  1LHHHHHHHHHHLL-----LEEEEEEE-eLLEEEEEEEELLLL--LLLLLEEE

DSSP  EEEL-LLLL1111eeeeelhhhh11111eeeee1hHHHHhhhhhh1111111111
Query  VSSV-EAGNadqfdt1tsdalglvgvpaavavpcxtiPWQIaqlhavlavlepkandr 204
ident  |
Sbjct  IIVVpYSEF-----aCALL-----yft 179
DSSP  EEEL1HHHH-----hHHHH-----hhh

DSSP  1HHHHHHH-----hhhhh1hHHHHhhHHHHhhhhhh11
Query  aHDLVDLQ-----1leg11ldADLXptRSACIaifearaq 239
ident  |
Sbjct  gSAHFNRSmralaktkgmslsehalstavrnthgckvpgRVLV--TPTEK-----d 230
DSSP  1LHHHHHHhhhhhh1lee111lee1lee111lee11EEL--LLLHH-----h

DSSP  11LLLLL1111hhhhhhhh1111111111hhhhhhhhhhhh1111
Query  hpWPPRVAtlphwpliyaglegldhlelartvdaaavqrfvaridrskr 292
ident
Sbjct  vfRLLGLP-----yrepardw 247
DSSP  hhHLLLL-----111hhhh11

```

No 389: Query=mol1A Sbjct=5ddmB Z-score=6.2

[back to top](#)

```

DSSP  -----11111111hhhhhhhhhhhh111hHHHH
Query  -----aapyspntlrsldr1tqvaerqgvfGRLQR 34
ident
Sbjct  sesvpvlelfsniwgagtktaqmwyqqgfrsleldirsqaslttqqaiglkhsdfLERMP 60
DSSP  11hhhhhhhh11111hhhhhhhh1111hhhhhh1111hhhhhhhh1hhhhHLEE

DSSP  HHHHHHHHHHHLL-LLLLLLLEEEHHHHHHhh11111LLLEEEEL-----
Query  HVAXIVVAQFAATL-TDDTGAPLLLVKGGSSLELrrgipdsrTSKDFATVAR----- 85
ident  | | | | |
Sbjct  REEATEIEQTVQKaaQAFNSGLLCVACGSYRRGK-----aTCGDVDVLIThpdgrshr 113
DSSP  HHHHHHHHHHHHHHhHLLLLLLEEEELHHHHLL-----1EELLEEEEE11111111

DSSP  1LHHHHHHHHHHHHh1111eeEEELLEEL1LLLLLLEEEEEEE11EEEEEEEE
Query  rDIELIHEQLADAGetgwegftAIFTAPEEIAApGXPVKPRRFTAKLSYrgRAFATVPIE 145
ident  | | | | |
Sbjct  gIFSRLLDSLREQE-----FLTDDLVSQ-EEENGQQKYLVCRLPG--PGRRHRLD 162
DSSP  1HHHHHHHHHHHL-----LEEEEEEE-EEELLEEEEEELLLL--LLLLLEEE

DSSP  EEEL-LLLL1111eeeeelhhhh11111eeeee1hHHHHhhhhhh1111111111
Query  VSSV-EAGNadqfdt1tsdalglvgvpaavavpcxtiPWQIaqlhavlavlepkandr 204
ident  |
Sbjct  IIVVpYSEF-----aCALL-----yft 179
DSSP  EEEL1HHHH-----hHHHH-----hhh

DSSP  1HHHHHHH-----hhhhh1hHHHHhhHHHHhhhhhh11
Query  aHDLVDLQ-----1leg11ldADLXptRSACIaifearaq 239
ident  |
Sbjct  gSAHFNRSmralaktkgmslsehalstavrnthgckvpgRVLV--TPTEK-----d 230
DSSP  1LHHHHHHhhhhhh1lee111lee1lee111lee11EEL--LLLHH-----h

DSSP  11LLLLL1111hhhhhhhh1111111111hhhhhhhhhhhh1111
Query  hpWPPRVAtlphwpliyaglegldhlelartvdaaavqrfvaridrskr 292
ident
Sbjct  vfRLLGLP-----pyrepardw 247

```



No 390: Query=mol1A Sbjct=4qzfA Z-score=6.2

[back to top](#)

```
DSSP -----
Query ----- 0
ident
Sbjct vkkisqyacqrtrtlnnynqlftdaldilaendelrenegsclafmrassvklslpfpit 60
DSSP 111111hhhh11111111hhhhhhhhhhhhhhhh111hhhhhhhhhhhhhh111111
```

```
DSSP -----
Query ----- 0
ident
Sbjct smkdtegipclgdkvkxiiegiiedesseakavlnteryksfklftsvfgvlgktaekw 120
DSSP 1hhhh11111111hhhhhhhhhhhhhh111hhhhhhhh1hhhhhhhhhh111111hhhhhh
```

```
DSSP ----1111111111hhhhhhhhhhhh111hHHHHHHHHHHHHHHHHL-LLLL1LLL
Query ----aapyspntlrsldrftqvaerqgvfGRLQRHVAXIVVAQFAAT-LTDDtGAP 55
ident
Sbjct frmgftrtlskiqsdkslrftmqkagflyedlVSCVNRPEAEAVSMLVKEaVVTf1PDA 180
DSSP hh11111hhhhhh11111111hhhhhhhh1hhhhHLLLEHHHHHHHHHHHHhHHHH1LLL
```

```
DSSP LEEEEHHHHHHhh111111LLLEEEEL-----1LHHHHHHHHHHhh1111
Query LLLVKGSSLELrrgipdsrTSKDFATVAR-----rDIELIHEQLADAGetgweg 105
ident |  | | | |
Sbjct LVTMTGGFRRGK-----mTGHDVDFLITspeatedeeqqLLHKVTDFWKQG----- 227
DSSP EEEELHHHLLL-----1EELLEEEEEE111111hhhhhhHHHHHHHHHLL-----
```

```
DSSP eeeEELLLEEL111111LLEEEEEEEEL---LEEEEEEEEEEL-LLLL1111eeee
Query ftaIFTAPEEiaapgxpvKPRRFTAKLSYR---GRAFATVPIEVSSV-EAGNadqfdtlt 161
ident
Sbjct ---LLLYCDIL-----QKCFILKLDHGvvhGKGWKAIRVDLVMCPYDRR----- 269
DSSP ---LEEEEL-----LEEEEEEHHh111LLEEEEEEEL1HHHH-----
```

```
DSSP elhhhh111111eeee1hHHHHhhhhhh1111111111HHHHHH-----
Query sdalglvgvpaavavpcxtiPWQIaqlhavtavlepkandraHDLVDLQ----- 212
ident
Sbjct -----aFALL-----gwtgSRQFERDlrryather 294
DSSP -----hHHHH-----hhh1LHHHHHHhhhhhhhh
```

```
DSSP ----hhhh11hhhhhhHHHHhhhhhh1111LLLLL1111hhhhhhhh111111
Query ----lleg11dadlxptRSACiaifearaqhpWPRVAtlphwpliyagalegldhle 267
ident
Sbjct kmmlndnalhydrtrkrfleAESE-----eeifAHLGLD----- 327
DSSP leee1111ee1111ee111LLH-----hhhHHLLL-----
```

```
DSSP 1111hhhhhhhhhhhhhh1111
Query lartvdaaaqavqrvaridratkr 292
ident
Sbjct -----yipwerna 336
DSSP -----111hh111
```

No 391: Query=mol1A Sbjct=1keja Z-score=6.1

[back to top](#)

```
DSSP -----
Query ----- 0
ident
Sbjct kkisqyacqrtrtlnnynqlftdaldilaendelrenegsclafmrassvklslpfpits 60
DSSP 111111hhhh11111111hhhhhhhhhhhhhhhh111111hhhhhhhhhhhh111111
```

```
DSSP -----
Query ----- 0
```



Query PRRFTAKLSYrgRAFATVPIEVSSV-EAGNadqfdtlttsdalglvgvpaavavpcxtiPW 183  
ident | |  
Sbjct KYLGVCRLPG--PGRRHRLDIIVVpYSEF-----aCA 254  
DSSP EEEEEELLLL--LLLLEEEEEEELHHHH-----hHH

DSSP HHHhhhhhh1111111111HHHHHH-----hHHhh11h  
Query QIaqklhavtavleepkandraHDLVDLQ-----lleg11ld 220  
ident | |  
Sbjct LL-----yftgSAHFNRSmralaktkgmslsehalstavrnrthgckvg 298  
DSSP HH-----hhlLHHHHHHhhhhhh1leeel11leeel1111lee

DSSP hhhHHHHHHHHhhhh1111LLLLL1111hhhhhhhh1111111111hhhhhhhh  
Query adlxPTRSACIaifearaqhpWPPRVat1phwpliyagalegldhlelartvdaaaqavq 280  
ident | |  
Sbjct pgrvLPTPTEK-----dvfRLLGLP----- 318  
DSSP 111eELLLHH-----hhHLLLL

DSSP hhhhhhh1111  
Query rfvaridratkr 292  
ident | |  
Sbjct ---yrepawrdw 327  
DSSP ---111hhhh111

No 393: Query=mol1A Sbjct=4p4mA Z-score=6.1

[back to top](#)

DSSP -----1111111111hhhhhhhhhhhh1111h  
Query -----aapyspntnrslrdrltqvaerqgvf 29  
ident | |  
Sbjct kpklkaiqeltqvhgfgpraaaaldfregiftvdellqkadsips1tdqqrvgikyfydi 60  
DSSP 1hhhhhhhh111111hhhhhhhhhh1111hhhhhhhh1111hhhhhhhh1hhhh

DSSP hhhHHHHHHHHHHHH--LLLL-1LLLLLEEEHHHHHHhh1111LLLLLEEEEL--  
Query grlqRHVAXIVVAQFAA-TLTD-dTGAPLLLKGGSSLElrrgipdSRTSKDFATVAR-- 85  
ident | | | |  
Sbjct nekiPMQESVLHENYLReKCMEv1GKDFSILICGSYRRR-----HPFSGDVDAILSrt 113  
DSSP 111eHHHHHHHHHHHHhhHHHHhhLLEEEELHHHLL-----LLEELLEEEEEEel

DSSP -----1LHHHHHHHHHHhh1111eeEEL-LLEE11111111LLEEEEEE  
Query -----rDIELIHEQLADAgewegftAIFT-APEEiaagxpVKPRRFTAK 131  
ident | |  
Sbjct ldapplsepvatgVLGHFVEFLES-----KYLEaTMAQ-----gPLKYMGMGR 158  
DSSP 11111111hhhh1HHHHHHHHHLL-----LLEEeEEEE-----1LLEEEEEEEL

DSSP EEEL--LEEEEEEEEEEL-LLLL1111eeeee1hhhh11111111eeeee1hHHHHhh  
Query LSYR--GRAFATVPIEVSSV-EAGNadqfdtlttsdalglvgvpaavavpcxtiPWQIaqk 188  
ident | |  
Sbjct LPPRinTKVYKARRVDIRLIeTKSV-----pTAML--- 188  
DSSP LLLL11111111LEEEEEEELHHHH-----hHHHH---

DSSP hhhhh1111111111HHHH-----hhh  
Query lhavtavleepkandraHDLV-----dlq 212  
ident | |  
Sbjct -----tftgSKNFvimirqaaiskgyllneyglfklgtpeeargknageelg 235  
DSSP -----hhlLHHHHHHhhhhhh1leeel11leeel11hhhh1111lee11

DSSP hhhhh11hhHHHHhhHHHHhhhh1111LLLLL111111hhhhhhhh1111111111h  
Query l1eg11ldaDLXPtRSACIaifearaqhpWPPRVat1phwpliyagalegldhlelartv 272  
ident | |  
Sbjct vpkdeledkRVEV--RSEQ-----dvfdVLGMP----- 261  
DSSP eelhhhh111111--LHHL-----hhhhLHLLL-----

DSSP hhhhhhhhhhhhh1111  
Query daaaqavqrfvaridratkr 292  
ident | |



```

ident
Sbjct AF--gslesglalknsdMDLVCVLMdsrVQSDTIALQFYEELIAE----GFEGKFLQRA-- 99
DSSP EE--1hhhh1111111111EEEEELL11LHHHHHHHHHHHHHHL----LEEEEEEEEL--

DSSP 11111LEEEEEEEEEE1leEEEEEEEEEEe111111111leeeelhhhh11111leeee
Query pgxpvKPRRFTAKLSYrgrAFATVPIEVsSveagnadqfdt1tsdalglvgvpaavavpc 178
ident
Sbjct -----RIPIIKLTSDT---ASFQCDIGFN----- 120
DSSP -----LEEEEEEEEL---LLLLEEEEEL-----

DSSP 11hhhhhhHHHHHHh1111111111LHHHHHHHHHHh11hhhhhhhhhhhhhhhh1
Query xtipwqiaQKLAHAVtavleepkaNDRAhdldvlqlleg11ldadlxptrsaciaifeara 238
ident
Sbjct ----nr1aIHNTLL-----LSSY----- 134
DSSP ----1hhHHHHHH-----HHHH-----

DSSP 111111111111LHHHHHHHHHLL-LLLL-----1111LHHHHHH--
Query qhpwpprvatlphWPLiYAGALEG-LDHL-----elarTVDAAAQ-- 277
ident
Sbjct -----tkLDAR-LKPMVLLvKHWAKrkqinspyfgt1ssygyv1mVLYYLIVhik 183
DSSP -----hhLHLL-HHHHHHHhHHHHhh11111hh1111hhhhhhHHHHHHH111

DSSP ----- 277
Query ----- 277
ident
Sbjct ppvfpn111splkqekivdgvfdvdkledippsqnysslgsl1hgffrfyaykfepre 243
DSSP 1111111111111111ee11ee111111hh11111111hhhhhhhhhhhhhh11111

DSSP --hhHHHH--hhhHLLLL----- 292
Query --avQRFV--aridRATKR----- 292
ident
Sbjct kvvtFRRPdgy1tkqEKGWTryilaiedpfeishnvgtrtvsssglyrirgefmaasr1ln 303
DSSP 1111LHLL11111hhHLL111111111111111111111111hhhhhhhhhhhhhhhh

DSSP -----
Query ----- 292
ident
Sbjct srsypipyds1feea 318
DSSP 1111111hhhh111

```

No 396: Query=mol1A Sbjct=4k4iI Z-score=6.0

[back to top](#)

```

DSSP ----- 0
Query ----- 0
ident
Sbjct tnhnlhiteklevlakaysvqgdkwralgyakainalksfhkpvtisyqeacsipigkrm 60
DSSP 1111hhhhhhhhhhhhhhhh11hhhhhhhhhhhhhhhh111111hhhhhh1111hh

DSSP -----1111111111hhhhh
Query -----aapyspntnrslr 15
ident
Sbjct aekieielesghlrkldhisesvpvlelfsniwgagtktaqmwyqqgfrsleldirsqas1 120
DSSP hhhhhhhhh111hhhh1111hhhhhhhh111111hhhhhhhh1111hhhhhhhh111

DSSP hhhhhhhhh1111hhhhHHHHHHHHHHHHH-LLLL11LLEEEHHHHHHhh111L
Query drltqvaerqgvvfg1qRHWAXIVVAQFAA-TLTDdtGAPLLLKVGSSLElrrgipdS 74
ident
Sbjct ttqqaiglkhysdf1ermPREEATEIEQTVQkAAQafnSGLLCVACGSYRRG-----K 173
DSSP 1hhhhhhhh11111leEHHHHHHHHHHHHHHHHH1LLEEEELHHHHLL-----L

DSSP LLLLLEEEEEL-----1LHHHHHHHHHHHHhh1111eeEEELLE-ELLL11LHLL
Query RTSKDFATVAR-----rDIELIHEQLADAGetgwegftAIFTAPE-EIAApgXPVKP 125
ident
Sbjct ATCGDVDVLITHpdgrshrg1FSRLLDLSLRQEG-----FLTDDLvsQEEN--GQQQK 223
DSSP LEELLEEEEE1111111111HHHHHHHHHHHLL-----LEEEEEEEEEE--LLEE

```

```

DSSP  EEEEEEEEE1EEEEEEEEEEEL-LLLL1111eeeeehhhhh111111eeeeelHHH
Query  RRFTAKLSYrgRAFATVPIEVSSV-EAGNadqfdltlsdalglvqpaavavpcxtiPWQ  184
ident  |                               |
Sbjct  YLGCRLPG--PGRRRRLDIIVVPYSEF-----aCAL  254
DSSP  EEEEEELL--LLLLEEEEEEEL1HHHH-----hHHH

```

```

DSSP  Hhhhhhhhh1111111111111HHHH-----hhhhhhh1hhHHHH
Query  IaqklhavtaveepkandraHDLV-----dlqlleg111daDLXP  225
ident  |
Sbjct  L-----yftgSAHFnrsmralaktkgmslsehalstavrntpgrVLPT  298
DSSP  H-----hhh1LHHHHhhhhhhhhhh111eee111eee111111111EELL

```

```

DSSP  hHHHHHhhhhhh111LLLLL111111hhhhhhhhhh1111111111hhHHHHhhhhhh
Query  trSACIaifearaqhWPPRVatlphwpliyagalegldhlelartvdaAAQAvqrfvar  285
ident  |
Sbjct  --PTEK-----dvfrLLGLP-----yropaerdwLEHHH-----  325
DSSP  --LLHH-----hhhhLLLL-----111hhh111LLLL-----

```

```

DSSP  hhh1111
Query  idratkr  292
ident  |
Sbjct  -----  325
DSSP  -----

```

No 397: Query=mol1A Sbjct=3c5gA Z-score=6.0

[back to top](#)

```

DSSP  -----
Query  -----  0
ident  |
Sbjct  atnhnlhiteklevlakaysvqgdkwralgyakainalksfhkpvtysqeacsipgigkr  60
DSSP  11111hhhhhhhhhhhhhhhh111hhhhhhhhhhhhhh1111111hhhh11111hh

```

```

DSSP  -----111111111hhhh
Query  -----aapyspptnlrsl  14
ident  |
Sbjct  maekiieilesghlrklhdhisesvpvlelfsniwagaktqaqmwyqqgfrslelrsqas  120
DSSP  hhhhhhhhh111hhhh111hhhhhhhhhh11111hhhhhhhh11111hhhhhh11

```

```

DSSP  hhhhhhhhh1111hHHHHHHHHHHHHHHHHHLL-LLLLLLLEEEHHHHHHhh111
Query  rdrltqvaerqgvfGRLQRHVAXIVVAQFAATL-TDDTGAPLLLKGGSSLELrrgipd  73
ident  |                               |
Sbjct  lttqqaiglkhydfLERMPREEATEIEQTVQKAAQAFNSGLLCVACGSYRRGK-----  174
DSSP  1hhhhhhhh1hhhhHLEEEHHHHHHHHHHHHHLLLLLLLEEEELHHHLLL-----

```

```

DSSP  11111LEEEEL-----1LHHHHHHHHHHHHhh111leeEELLEELL1111111
Query  srTSKDFATVAR-----rDIELIHEQLADAGetgwegftaIFTAPEEIAapgXPVKP  125
ident  | |                               | |
Sbjct  -aTCGDVDVLIThpdgrshrgIFSRLDLSLRQEG-----FLTDDLVSQeengQQQK  224
DSSP  -1EELLEEEEE11111111HHHHHHHHHHHLL-----LEEEEEEL11111LLE

```

```

DSSP  EEEEEEEEE1EEEEEEEEEEELLLLL1111eeeeehhhhh111111eeeeelHHH
Query  RRFTAKLSYrgRAFATVPIEVSSVEAGNadqfdltlsdalglvqpaavavpcxtiPWI  185
ident  |                               |
Sbjct  YLGCRLPG--PGRRRRLDIIVVPYSE-----faCALL  256
DSSP  EEEEEELL--LLLLEEEEEEELHHH-----hHHHH

```

```

DSSP  hhhhhhh1111111111111HHHHHHH-----hhhhh1hHHH
Query  aqklhavtaveepkandraHDLVDLQ-----lleg111dADL  223
ident  |
Sbjct  -----yftgSAHFNRSmkalaktkgmslsehalstavvhgckvqgRVL  300
DSSP  -----hhh1LHHHHHHhhhhhh111eee111eee111111111LEE

```

```

DSSP  HhHHHHHhhhhhh1111LLLLL1111hhhhhhhhhh1111111111hhhhhhhhhh
Query  XptRSACIaifearaqhWPPRVatlphwpliyagalegldhlelartvdaaaqavrfv  283

```



```

query      aapysppptnlrslrdlrltqvaerqgvvfglqrhvxivvaqfaatltdtgaPLLLVK  30
ident
Sbjct      rmgfrtlskiqsdkslrftmqkagflyyedlvscvNRPEAEAVSMLVKEaVVTFIPDAL  180
DSSP      h11111hhhhhh111111hhhhhhhh1hhhh1leEHHHHHHHHHHHHHHHHH1LLE

DSSP      EEEHHHHHHHHhh111111LLEEEEL-----1LHHHHHHHHHHHHhh111le
Query      LLVKGSSLELrrgipdsrTSKDFATVAR-----rDIELIHEQLADAGetgwegf  106
ident
Sbjct      VTMTGGFRRGK-----mTGHVDVDFLITspeatedeeqqLLHKVTDVFWKQGG-----  226
DSSP      EEELHHHLLL-----1EELLEEEEEE11111hhhhhhHHHHHHHHHHH1-----

DSSP      eeEELLEEL111111LLEEEEEEEEL---1EEEEEEEEEEEL-LLLL111leeee
Query      taIFTAPEElaapgxpvKPRRFTAKLSYR---gRAFATVPIEVSSV-EAGNadqfdt1ts  162
ident
Sbjct      --LLLYCDIL-----QKCFLLKLDHGrvhgKGWKAIRVDLVMCpYDRR-----  268
DSSP      --LEEEEEEEL-----LEEEEEEEHHh111LLEEEEEEEEL1HHHH-----

DSSP      1hhhh11111leeeel1hHHHHhhhhhh1111111111HHHHHH-----
Query      dalglvgvpaavavpctiPWQIaqlhavlavleekandraHDLVDLQ-----  212
ident
Sbjct      -----aFALL-----gwtgSRQFERDlrryatherk  294
DSSP      -----hHHHH-----hhh1LHHHHHHhhhhhhhh1

DSSP      ---hhhh11hhhhhhHHHHhhhhhh1111111111hhhhhhhh1111111
Query      ---llegllldadlxptrSACiaifearaqhPWPPRVatlpwpliyagalegldhlela  269
ident
Sbjct      mmlndnhalydrtkrvf1EAES-----eeifAHLGLD-----  326
DSSP      eeel11leee111leeeLLL-----hhhhHHHLLL-----

DSSP      1hhhhhhhhhhhhhhhh1111
Query      rtvdaaaqavqrfvaridratkr  292
ident
Sbjct      -----yiepwerna  335
DSSP      -----11hhhh11

```

No 400: Query=mol1A Sbjct=4e80A Z-score=5.9

[back to top](#)

```

DSSP      111111111hhhhhhhhhhhh11LHHHHHHHHHHHHHHHHHLLL11111LEEEE
Query      aapysppptnlrslrdlrltqvaerqgvvfglqrhvxivvaqfaatltdtgaPLLLVK  60
ident
Sbjct      -----hkeftkfcyevyneikiSDKEFKKRAALDTRLCLKRIS-----PDAELV  46
DSSP      -----1hhhhhhhhhhhh11LHHHHHHHHHHHHHHHHHLLL-----LLEEEE

DSSP      HHhhhhhh111LLL----1LEEEEL1hhHHHHHHHHHH111eEEELLEE1
Query      GGsslelrrgipDSRT----sKDFATVARRdieLIHEQLADAGETGwegfTAIFTAPEEi  116
ident
Sbjct      AF-----gsleSGLA1knsdMCLVMDM---TIALQFYEEELIAE----GFEGKFLQR-  92
DSSP      EE-----1hhHLLL11111EEEEELLL---LHHHHHHHHHHH----LLEEEEEE-

DSSP      111111LLEEEEEEEEl1eEEEEEEEEEe111111111leeeelhhhh11111leee
Query      aapgxpvKPRRFTAKLSYRgrAFATVPIEVSSveagnadqfdt1tsdalglvgvpaavav  176
ident
Sbjct      -----ARIPIIKLTSDG---ASFQCDIGFN-----  114
DSSP      -----LLEEEEEEEEL---LLEEEEL-----

DSSP      eel1hhhhhhhhhhhh1111111111LHhhhhhhhhhh11hhhhhhhhhhhhhhhh
Query      pcxtipwqiaqlhavlavleekandraHdlvdlqllegllldadlxptrsaciaifea  236
ident
Sbjct      -----nr1aihnt1LLSS-----  127
DSSP      -----1hhhhhhHHHH-----

DSSP      h111111111111LHHHhHHHh-HLLLLL-----11LLLhHHH
Query      raqhpwpprvatlpWPLiyAGA-LEGLDH-----leLARTvdAAA  276
ident
Sbjct      -----ytkLDA-RLKpMvLLVKHwakrkqinspyfgt1ssygvLMVL-yYLI  173

```







```

DSSP -----aapyspntlnrslr 15
Query -----
ident -----
Sbjct aekieielesghlrkldhisesvpvlelfsniwgagtktaqmwyqqgfrsledirsqasl 120
DSSP hhhhhhhhhhlllhhhhllllhhhhhhhhhllllllhhhhhhhhhlllllhhhhhhhhhlll

DSSP hhhhhhhhhhllllhHHHHHHHHHHHHHHHHLLL-LLLLLLLLEEEHHHHHHHHhhlllll
Query drltqvaerqgvfGRlQRHVAXIVVAQFAATL-TDDTGAPLLLKGGSSLELrrgipds 74
ident | | | | | | | | | |
Sbjct ttqqaiglkhysdfLERMPREEATEIEQTVQKAaQAFNSGLLVCVACGSYRRGK----- 173
DSSP lhhhhhhhhllhhhhHLLLEHHHHHHHHHHHHHHHL-LLLLLLLLEELHHHHLLL-----

DSSP lLLLLLEEEEL-----lLHHHHHHHHHHHHhhllllleEEELLEELlllllLLLE
Query rTSKDFATVAR-----rDIELIHEQLADAGetgwegftAIFTAPEElaapgxPVKPR 126
ident | | | | | | | | | |
Sbjct aTCGDVDVLIThpdgrshrgIFSRLLDSLRQEG-----FLTDDLVSQ-eengQQQKY 224
DSSP lEELLEEEEEEllllllllHHHHHHHHHHHLL-----LEEEEEELL-lllllLLEE

DSSP EEEEEEEllEEEEEEEEEEEEELLllllleeeelhhhhllllleeeellhHHHHh
Query RFTAKLSYrgRAFATVPIEVSSVEAGNadqfdtltsdalglvgvpaavavpcxtiPWQla 186
ident | | | |
Sbjct LGVCRLPG--PGRRRRRLDIIVPYSE-----faCALL- 255
DSSP EEEEELL--LLLLEEEEEEEEELLHHH-----hHHHHH-

DSSP hhhhhhhhllllllllllHHHHHHHH-----hhhhllhHHHHhhHHHH
Query qklhavravleekandraHDLVDLQL-----legllldADLXptRSAC 230
ident | | | | | | |
Sbjct -----yftgSAHFNRSMralaktkgmslsehalstavpgrVLP--TPTE 298
DSSP -----hhhlLHHHHHHHHhhhhhlllelllllelllllLLL--LLH

DSSP HhhhhhhlllllLLLllllhhhhhhhhhllllllllLHhhhhhhhhhhhhhhhll
Query IaifearaqhpWPPRVatlpwplyagaleglhdhleLARTVdaaaqavqrfvaridrat 290
ident | | | | |
Sbjct K-----dvrLLGL-----pyrepaerdwLEHHH----- 322
DSSP H-----hhHLLL-----llllhhllllLLL-----

DSSP ll
Query kr 292
ident
Sbjct -- 322
DSSP --

```

No 404: Query=mollA Sbjct=4qzhA Z-score=5.9

[back to top](#)

```

DSSP -----
Query ----- 0
ident -----
Sbjct kisqyacqrtrtlnnynqlftdaldilaendelrenegsclafmrassvlkslpfipism 60
DSSP lllllhhhhllllllllhhhhhhhhhhhhhhllhhhhhhhhhhhhhhlllllll

DSSP -----
Query ----- 0
ident -----
Sbjct kdteqipclgdvkksiiegiiedesseakavlnderyksfklftsvfvglkaekwfr 120
DSSP hhhllllllhhhhhhhhhhhhllhhhhhhhhhhhhhhhhllllllhhhhhhhhh

DSSP --llllllllllhhhhhhhhhhhhllllhhhhHHHHHHHHHHHL-LLLLLLE
Query --aapyspntlnrslrdrltqvaerqgvfgrlQRHVAXIVVAQFAAT-LTDDTGAPLL 57
ident | | | | |
Sbjct mgfrtlskiqsdkslrftqmkgagflyingdlvscvNRPEAEAVSMLVKEaVVTf1PDALV 180
DSSP lllllhhhhhhhllllllhhhhhhhhhhhhllleHHHHHHHHHHHHHHHHllLLEE

DSSP EEEHHHHHHHHhhllllllLLEEEEL-----lLHHHHHHHHHHHHhhllllle
Query LKGGSSLELrrgipdsrTSKDFATVAR-----rDIELIHEQLADAGetgwegft 107
ident | | | | | |

```

```

DSSP eEELLLEELL11111LLEEEEEEEEEEL----1EEEEEEEEEEEEEL-LLLL1111eEEEE
Query aIFTAPEEIAapgxPKPRRFTAKLSYR----gRAFATVPIEVSSV-EAGNadqfdtlts 162
ident
Sbjct -LLLYCDILE-----SQKCFLLKLDHGGrvhsgKGWKAIRVDLVMCPYDRR----- 270
DSSP -LEEEEEEL-----LLEEEEEEEEEHH11111LLEEEEEEEEEEL1HHHH-----

DSSP 1hhhh11111eEEEE1hHHHHhhhhhhhh11111111111HHHHHHH-----
Query dalglvgpaavavpctiPWQIaqlhavlavleekandraHDLVDLQ----- 212
ident
Sbjct -----aFALL-----gwtgSRQFERDlrryatherk 296
DSSP -----hHHHH-----hhh1LHHHHHHhhhhhhhhhh1

DSSP ---hhhhh1hhhhhhhhHHHHhhhhhh11111111111hhhhhhhh111111111
Query ---llegllldadlxptrSACiaifearaqhPWPPRVatlpwpliyagalegldhlela 269
ident
Sbjct mmlndnhalhydrtrkrf1EAES-----eeifAHLGLD----- 328
DSSP eee1111eeel111eeelLLL-----hhhhhHHHLLL-----

DSSP 1hhhhhhhhhhhhhhhhhh1111
Query rtvdaaaqavqrfvaridratkr 292
ident
Sbjct -----yiepwerna 337
DSSP -----11hhhh111

```

No 405: Query=mol1A Sbjct=5dedG Z-score=5.9

[back to top](#)

```

DSSP 111111111hhhhhhhhhhhhHLLLHHHHHHHHHHHHHHHHHHLLL--LLL--LL
Query aapyspntnlrslrdrltqvaeRQGVVFGRLQRHVAXIVVAQFAATLT--DDTG--AP 55
ident
Sbjct -----DKQWERFLVPYRQAVEELKVKLGIRt1YEYEdhSP 37
DSSP -----LHHHHHLLHHHHHHHHHHHHHHHHHHH1LLL111LL

DSSP LEEEEhhHHHHhh111LLL-----1LLEEEEEEL--LHHHHHHH
Query LLLVKggSSLElrrgIPDSR-----tSKDFATVARR--DIELIHEQL 95
ident
Sbjct IEFVT--GRVK---PVASIEkarrksiplheietmqdIAGLRIMCQFvdDIQIVKEML 91
DSSP LLEE--EEL-----LHHHHhhhh11111hhhhhh111LEEEEEELhhHHHHHHHH

DSSP HHHHhh1111eEEEELLEEL--LLL111LLEEEEEEEEEEL--1EEEEEEEEEEEEEL
Query ADAGetgwegfTAIFTAPEEII--AAPGxpvKPRRFTAKLSYR---gRAFATVPIEVSSVE 150
ident
Sbjct FARK-----DFTVVDQRDYiaEHKESgyRSYHLVLYPLQtvsqEKHVLVEIQIRTLA 144
DSSP HLLL-----LLEEEEEEL11LLL111LLEEEEEEEEE1111EEEEEEEEEEEEHH

DSSP 111111eEEEE1hhhh11111eEEEE1hhhhHHHHHHHLL111111111hhhh
Query agnadqfdtltsdalglvgpaavavpctipwqiAQLHAVTAVleekandrahdldv 210
ident
Sbjct -----mfwATIEHSLYK----- 157
DSSP -----hhHHHHHHHLLL-----

DSSP hhhhhhh1hhhhhhhhhhhhHHHH11111111111hhhhhhhh111111111
Query lqllegllldadlxptrsaciaiFEARaqhpwprvatlpwpliyagalegldhlelar 270
ident
Sbjct -----ipekvklrLQRA----- 169
DSSP -----1hhhhhhHHHH-----

DSSP 1hhhhhhhhhhhhhhhh1111
Query tvdaaaqavqrfvaridratkr 292
ident
Sbjct -seaasr1deemseirgevqea 190
DSSP -hhhhhhhhhhhhhhhh111

```

[back to top](#)

```
DSSP 11111111111hhhhhhhhhhhhHLLLLHHHHHHHHHHHHHHHHHHLL--LLL---LL
Query aapyspntlrsldr1tqvaerQGVVFGRLQRHVAXIVVAQFAATLT--DDTG---AP 55
ident |
Sbjct -----DKQWERFLVPYRQAVEELKVKLGIRt1YEYEdhSP 37
DSSP -----LHHHHHHHHHHHHHHHHHHHHHHHHH1LLLL111LL
```

```
DSSP LEEEEhHHHHhh1LLLLL-----1LLEEEEEELL--LHHHHHHHH
Query LLLVKggSSLElrrgIPDSR-----tSKDFATVARR--DIELIHEQL 95
ident |
Sbjct IEFVT--GRVK---PVASILEkarrksiplheietmqdIAGLRIMCQFvdDIQIVKEML 91
DSSP LLEE--EEL---LHHHHhhhhhh1111hhhhhh11LEEEEEELLhhHHHHHHHH
```

```
DSSP HHHhh1111eEEEELLEEL---LLL111LEEEEEEEEEEL---1EEEEEEEEEEEL
Query ADAGetgwegfTAIFTAPEEI---AAPGxpvKPRRFTAKLSYR---gRAFATVPIEVSSV 149
ident |
Sbjct FARK-----DFTVVDQRDYiaeHKES-gyRSYHLVLYPLQtvsGKHLVVEIQIRTL 143
DSSP HHL-----LLEEEEEEL111LLL-1LLEEEEEEEEEEL111EEEEEEEEEEH
```

```
DSSP L1111111eEEEElhhhh111111eEEEElhhhhHHHHHHHHL1111111111hhhh
Query EagnadqfdtltsdalglvgpaavavpcxtipwqiAQKLHAVTAveepkandrahd1v 209
ident |
Sbjct A-----mnfWATIEHSLN----- 156
DSSP H-----hhhHHHHHHHH-----
```

```
DSSP hhhhhhh1111111111111111111111111111111111111111111111111
Query dlqllegllldadlxptrsaciaifearaqhpwprVATLPhwpliyagalegldhlela 269
ident |
Sbjct -----yKYSGN-----ipekvk1r1qr 173
DSSP -----hLLLLL-----11hhhhhhhh
```

```
DSSP 11hhhhhhhhhhhhhhhh1111
Query rtvdaaaqavqrfvaridratkr 292
ident |
Sbjct aseasrldeemseirgevqea 196
DSSP hhhhhhhhhhhhhhhhh1111
```

No 407: Query=mol1A Sbjct=4ig8A Z-score=5.8

[back to top](#)

```
DSSP 11111111111hhhhhhhhhhhhHLL-LHHHHHHHHHHHHHHHHH-LLLL-LLLLLLE
Query aapyspntlrsldr1tqvaERQG-VVFGRLQRHVAXIVVAQFAA-TLTD-DTGAPLL 57
ident |
Sbjct -----dlrntpaksldkfiEYLLpDTCFRMQINHAIDIICGFLKeRCFRgSSYPVCV 53
DSSP -----111111hhhhhhhhHLL1LHHHHHHHHHHHHHHHHHHhLLLL1LLLLLLE
```

```
DSSP -EEEEHHhhHHHLLL11111LLEEEEEEL-----LHHHHHHHHHHHHHLL--LL
Query -LVKGGs1ELRRGIPdsrtsKDFATVARR-----DIELIHEQLADAGETGW--EG 105
ident |
Sbjct sKVVKGG-sSGKGTTLrgrsdADLVVFLSP1ttfqdqlnRRGEFIQEIRRQLEACQreRA 112
DSSP eEEEEH-hHHHLLL11111EEEEEL111hhhhHHHHHHHHHHHHHHHHh1LL
```

```
DSSP EEEEL11e1111111111111111111111111111111111111111111111111
Query FTAIFTapeeiaapgxvpkPRRFTAKLSYR-gRAFATVPIEVSSVEAGNadqfdtltsda 164
ident |
Sbjct FSVKFE-----gnpRALSFVLSSLq1GEGVEFDVLPAPFDALGQ----- 150
DSSP LEEEL-----111LLEEEEEEL11LLEEEEEEEELLLL-----
```

```
DSSP hhh11111eEEEElhhhhhhhhhhhh1111111111111111111111111111111111
Query lglvgpaavavpcxtipwqiaklhavtaveepkandrahd1vd1qllegllldadlx 224
ident |
Sbjct -----1 151
DSSP -----1
```

```

Query PTRSacIAIFEARAQ----- 239
ident
Sbjct TGGY--KPNPQIYVKlieectdlqkegefstcftelqrdfllkqrptklkslirlvkhwq 209
DSSP LLLL--LLLHHHHHHhhhhhhhh111111hhhhhhhh111111hhhhhhhhhhhhhhhhhh

DSSP 11111111111hHHHHH-----hhh11111111111hHHHH-----
Query hpwpprvatlphwPLIYA-----galegl dhlelartvDAAA----- 276
ident
Sbjct nckkkkglklppqyALELLtvyawergsmkthfntaaqgfrtvlelvinyqqLCIYwtkyd 269
DSSP hhhhhh11111hHHHHHHhhhhhhhh111111hhhhhhhhhhhhhhhhhhLEEL111111

DSSP -----hhhhhhh
Query -----qavqrfv 283
ident
Sbjct fknpiiekylrrqltkprpvildpadptgnlgggdpkgwrqlaqeaeawlnypcfknwdg 329
DSSP 111hhhhhhhhhh111111eeeee1eeeee111hhhhhhhhhhhhhhhhhh111hh111111

DSSP hhhhh1111
Query aridratkr 292
ident
Sbjct spvsswill 338
DSSP 1111111111

```

No 408: Query=mol1A Sbjct=3nybA Z-score=5.8

[back to top](#)

```

DSSP -----1111111111hhhhhhhhhhhhhh111111HHHHHHHHHHHHHHHHHHLLL111
Query -----aapyspptnlrslrdrltqvaerqGVVFGRLQRHVAXIVVAQFAATLTddt 52
ident
Sbjct gsywilnhdshkqkeisdwltfeikdfvayisPSREEIEIRNQTISTIREAVKQLW--- 57
DSSP 111hhh1111111111hhhhhhhhhhhhhh111111HHHHHHHHHHHHHHHHHHLLL---

DSSP 11LLEEEHHhhhhhh111LLL---11LLEEEEL---LHHHHHHHHHHHHH111
Query gaPLLLVKGGsslelrrgipDSRT---skDFATVARR---DIELIHEQLADAGETGweg 105
ident
Sbjct --PDADLHVf-----gsysTDLYlpgsdiDCVVTSELggkESRNNLYSLASHLKKK--- 106
DSSP --LLEEEEL-----111LLL11111eEEEELLL1hhHHHHHHHHHHHHHHH---

DSSP EEEE-ELLLEEL111111LLEEEEEEEElleeEEEEEEEEEe1111111leeeelh
Query FTAI-FTAPEElaapgxpvKPRRFTAKLSYrgraFATVPIEVSsveagnadqfdtlttsda 164
ident
Sbjct NLATeVEVAKA-----RVPIIKFVEPH---sGIHIAVSFE----- 139
DSSP LLLL1LEEEEL-----LLEEEEEEEL---1LEEEEEEEL-----

DSSP hhh11111leeeel1hhhhhhHHHHHH1111111LLLhhhhhhhhhhhh11hhhhh
Query lglvgvpaavavpcxtipwqiaQKLHAVTavleepkaNDRAhdldvdlqlllegl1dadlx 224
ident
Sbjct -----rtnGIEAAKL-----IREW----- 153
DSSP -----111LLHHHHH-----HHHH-----

DSSP hhhhhhhhhhh1111111111LHHHhHHHH-HLLL-----1
Query ptrsaciaifearaqhpwpprvatlphWPLiYAGA-LEGLD-----h 265
ident
Sbjct -----IDDTP-GLRE1VLIVKqflharrlnnvhtgglggf 187
DSSP -----hLLL-LHHHhHHHHhhhh11111hh111hh

DSSP 11111LHHHHH-----hhhhHHHH
Query lelarTVDAAAQ-----avqrFVAR 285
ident
Sbjct siic1VFSFLHMhpriitneidpkdnlgvllieffelygknfyddvalgssdgyVYFP 247
DSSP hhhhhHHHHHLL1hhhh1111hh1hhhhhhhhhhhhhh11111leeeel111eEEEE

DSSP hhLLLL-----
Query idRATKR----- 292
ident

```

.....

DSSP -----  
Query ----- 292  
ident  
Sbjct fkdrlgksilgnviky 323  
DSSP hhhh111111111111

No 409: Query=mol1A Sbjct=5decA Z-score=5.8

[back to top](#)

DSSP 1111111111hhhhhhhhhhHLLLLHHHHHHHHHHHHHHHHHHLL--LLLLLL-LE  
Query aapyspntnlrslrdrltqvaeRQGVVFGRLQRHVAXIVVAQFAATLT--DDTGAP-LL 57  
ident |  
Sbjct -----DDKWERFLVPYRQAVEELKVKLGIRt1YEDDHSpIE 37  
DSSP -----LHHHHHHHHHHHHHHHHHHHHHHHHhhHLLLLL1LL

DSSP EEEhhHHHHhhH1LLLL-----1LLEEEEEELL--LHHHHHHHHH  
Query LVKggSLElrrgIPDSR-----tSKDFATVARR--DIELIHEQLAD 97  
ident | | | | |  
Sbjct FVT--GRVK---PVASilekarrksiplheietmqdIAGLRIMCQFvdDIQIVKEMLFA 91  
DSSP EEE--EEEL---LHHHHhhhhhh111hhhhhh11LEEEEEELLhhHHHHHHHHH

DSSP HHHh111leEEELLLEELL1111LLEEEEEEEEL--1EEEEEEEEELL1111  
Query AGetgwegfTAIFTAPEEIAAPgxpvKPRRF TAKLSYR---gRAFATVPIEVSSVEagna 154  
ident | | |  
Sbjct RK-----DFTVVDQRDYIAG---yRSYHLVVLPLQvtvsGKHLVVEIQIRTLA---- 137  
DSSP LL-----LLEEEEEELL--1LLEEEEEEEElleEEEEEEEEHH-----

DSSP 11leeeehhhhh1111leeeehhhhhHHHHHHHLL1111111111hhhhhhhh  
Query dqfdtltsdalglvgvpaavvpcxtpwqiAQKLHAVTAleepkandrahd1vdlqll 214  
ident  
Sbjct -----mfwATIEHSLN----- 149  
DSSP -----hhHHHHHHHH-----

DSSP hhh11hhhhhhhhhhhhhh1111111L LLLLHhhhhhhhh1111111111hh  
Query eglldadlxptrsaciaifearaqhpwrVATLPHWpliyagalegldhlelartvda 274  
ident  
Sbjct -----ykysGNlPEKV-----klrlqrsea 170  
DSSP -----hh1L LLLHH-----hhhhhhhh

DSSP hhhhhhhhhhhhh1111  
Query aaqavqrfvaridratkr 292  
ident  
Sbjct asrldeemseirgevqea 188  
DSSP hhhhhhhhhhhhh11

No 410: Query=mol1A Sbjct=4ud5A Z-score=5.8

[back to top](#)

DSSP 1111111111hhhhhhhhhhhhL LLLLLHHHHHHHHHHHHHHHLL11111LLEEEE  
Query aapyspntnlrslrdrltqvaeqgvVFGRLQRHVAXIVVAQFAATLTddtgaPLLVK 60  
ident | |  
Sbjct -----hkeftkfcyevyeikiSDKEFKKRAALDTLRLCLKRIS-----PDAELV 46  
DSSP -----lhhhhhhhhhhhh1L LHHHHHHHHHHHHHHHHHHL-----LLEEEE

DSSP HHHhhhhhh111L L L-----LLEEEEEELLhHHHHHHHHHHH111leEEEELLIEEL  
Query GGsslelrrgipDSRT----sKDFATVARRDiELIHEQLADAGETGwegfTAIFTAPEE 116  
ident | | |  
Sbjct AF-----gsleSGLA1knsdMCLVMDSS-DTIALQFYEELIAE----GFEGAF-LQA 94  
DSSP EE-----lhhHLLL1111LEEEEEELL-L LHHHHHHHHHHH-----LEEEEE-EEE

DSSP L111111LLEEEEEEEEL--1EEEEEEEEEl1111111leeeehhh11111le





```

DSSP  hhHHHHH-----
Query  vdAAAQA----- 278
ident
Sbjct  -yYLIVHv ikppvfpnlll splkqek ivdgfdvgfddkledippsqnysslgslhgffaf 238
DSSP  -hHHHHLl1111111111111111eelele111111hhl1111111111hhhhhhhhhh

DSSP  -----hHHHHHhHLLL-----
Query  -----vqRFVARidRATK----- 291
ident
Sbjct  yayafeprekvvfrrpDGYLTkqEKGWtsatehtgsadqiikdryilai edpfeishnv 298
DSSP  hh1111111111111111LLLhHLLl11eele1111eele1111111111111111

DSSP  -----l
Query  -----r 292
ident
Sbjct  grtvsssglyrirgefmaasrllnsrsypipyds lfeepippr 342
DSSP  l1111hhhhhhhhhhhhhhhhhhhh111111hhhh1111111111

```

No 412: Query=mol1A Sbjct=4k4gE Z-score=5.8

[back to top](#)

```

DSSP  -----
Query  ----- 0
ident
Sbjct  atnhnlhiteklevlakaysvqgdkwralgyakainalksfhkpvtsyqeacsi pigkr 60
DSSP  l1111hhhhhhhhhhhhhhhhhh111hhhhhhhhhhhhhh111111hhhh111111hh

DSSP  -----l111111111hhhh
Query  -----aapyspptnlrs l 14
ident
Sbjct  maekii eilesglhrkl dhisesv pvl elfsn iwgagtktaqmw yqgfrs ledirsqas 120
DSSP  hhhhhhhhh111hhhh111hhhhhhhh111111hhhhhhhh111111hhhhhhhh11

DSSP  hhhhhhhhh1111hhhhHHHHHHHHHHHHHH--LLLLl1111LEEEEHhhhhhh1111
Query  rdr l tqvaerqgvfgr l qRHVAXIVVAQFAA--TLT DdtGAPLLL VKGSSLEl rrgipd 73
ident
Sbjct  lttqaiglkhysdf lermPREEATEIEEQTVQkAAQAFnSGLLCVACGSYRRG----- 173
DSSP  l1hhhhhhhh11hhhh11eEHhHHHHHHHHHHHHHHLl111LEEEELHhHHL-----

DSSP  LLLLLLEEEEL-----lHHHHHHHHHHHh1111eEEELLEE111111111111111
Query  SRTSKDFATVAR-----rDIELIHEQLADAGetgwegftAIFTAPEEiaapgxPKP 125
ident
Sbjct  KATCGDV DVLiThpdgrshrgIFSRL L DSRQEG-----FLTDDLVS-----qQQK 219
DSSP  LLEELLEEEEL1111111111LHHHHHHHHHLL-----LEEEEL-----1LLE

DSSP  EEEEEEEEE11EEEEEEEEEEEEL--LLLLl111eeeee1hhhh111111eeeee1hHHH
Query  RRFTAKLSYrgRAFATVPIEVSSV-EAGN adqfdtltsdalglvgpaavavp cxtiPWQ 184
ident
Sbjct  YLGVCR L PG--PGRRHRRLDIIVpYSEF-----aCAL 250
DSSP  EEEEELLL--LLLLLEEEEL1HHHH-----hHHH

DSSP  Hhhhhhh111111111111HHHH-----hhhhhhhh11
Query  Iaqlh avtavleepkandraHDLV-----dlqlleglll 219
ident
Sbjct  L-----yftgSAHFnrsmralaktkgmslsehalstavrnthgckvgp 294
DSSP  H-----hhhLHHHhhhhhhhhhh111ee111ee1111111111111111

DSSP  hHHHHHhHHHHhhhh1111LLLl111111hhhhhhhh111111111111hhhhhhhh
Query  dADLXptRSACIaifearaqhPWP RRvatlphwpli yagalegldhlel artvdaaaqav 279
ident
Sbjct  gRVLP--TPTEK----d vfrLLGLPY----- 314
DSSP  lLEEL--LLLH-----hhhhHLLL-----

DSSP  hhhhhhh1111
Query  qrfvaridratkr 292

```

DSSP ----11hhh1111

No 413: Query=mol1A Sbjct=4m04A Z-score=5.8

[back to top](#)

DSSP -----  
 Query ----- 0  
 ident -----  
 Sbjct wmpayacqrptplthhntglsealeilaeagfegsegrlltfcraasvkalpsvttl 60  
 DSSP 11111hhh1111111111hhhhhhhhhhhhhhhh11hhhhhhhhhhhhhhhh1111111h

DSSP -----  
 Query ----- 0  
 ident -----  
 Sbjct sqlqglphfgehssrvvqellehgvceevervrrseryqtmklftqifgvvktadrwyr 120  
 DSSP hhh1111111hhhhhhhhhhhhhhhh11hhhhhhhhhhhhhhhh11111hhhhhhhh

DSSP -111111111hhhhhhhhhhhhhh111hhhhhHHHHHHHHHHHHHHL-LLLL1LLLLEE  
 Query -aapyspsptnlrsldrLrtqvaerqgvvfgrlqRHVAXIVVAQFAAT-LTDDtGAPLLL 58  
 ident |  
 Sbjct eglrtlddlreqpklqtqqkag1qhhqdlstpvLRSDVDALQQVVEEaVGQA1PGATVT 180  
 DSSP 11111hhhhhhhhhh11hhhhhhhhhh11hhhh11leEHHHHHHHHHHHHHHHHH1LLLLEE

DSSP EHHHHHHHHhh111111LLLLEEEEL-----1LHHHHHHHHHHHHhh111leeEE  
 Query VKGGSSLELRrgipdsrTSKDFATVAR-----rDIELIHEQLADAGetgwegftaIF 110  
 ident || | |  
 Sbjct LTGGFRRGK-----1QGHVDVFLITHpkqgeagLLPRVMCRLQDQG-----LI 224  
 DSSP ELHHHHL-----1EELLEEEEEE11111111HHHHHHHHHHHLL-----LE

DSSP LLLLe11111111LLLLEEEEEELLEeEEEEEEEEEL-LLLL1111eeee1hhhh11  
 Query TAPeEiaapgxPKPRRFTAKLSYRGRaFATVPIEVSSV-EAGNadqfdtltsdalglvg 169  
 ident | | | |  
 Sbjct LYHQ-----aFERSFCIFRLPQPGS-WKAVRVDLVVApVSQF----- 260  
 DSSP EELL-----1LLEEEEEEEEEELLE-EEEEEEEEEL1HHHH-----

DSSP 1111eeee11hHHHHhhhhhhhh1111111111HHHHHHH-----h  
 Query vpaavavpcxtiPWQIaqklhavtavlepkandraHDLVDLQ-----1 213  
 ident |  
 Sbjct -----pFALL-----gwtgSKLFQRElrrfsrkekg1wlnshg 293  
 DSSP -----hHHHH-----hhhlHHHHHHHHhhhhhhhh11ee1111

DSSP hhh11hHHHHhhHHHHhhhhhh1111LLLLL1111hhhhhhhh111111111hh  
 Query leg11ldADLXptRSACIaifearaqhpWPPRVAtlphwpliyagalegldhlelartvd 273  
 ident |  
 Sbjct lfdpeqkTFFQ--AASEE-----difRHGLG----- 318  
 DSSP ee1111EELL--LLLH-----hhhHLLL-----

DSSP hhhhhhhhhhhhh1111  
 Query aaaqavqrfvaridrskr 292  
 ident -----  
 Sbjct -----ylppeqrna 327  
 DSSP -----111hhh111

No 414: Query=mol1A Sbjct=5dedC Z-score=5.8

[back to top](#)

DSSP 111111111hhhhhhhhhhhhHLLLHHHHHHHHHHHHHHHHHLL--LLL--LL  
 Query aapyspsptnlrsldrLrtqvaerQGVVFGRLQRHVAXIVVAQFAATLT--DDTG--AP 55  
 ident | |  
 Sbjct -----DKQWERFLVPYRQAVEELKVKLGIRt1YEYEdhSP 37  
 DSSP -----LLLLLLLLHHHHHHHHHHHHHHHHHHHHhhHLL111LL





[back to top](#)

```
DSSP -----
Query ----- 0
ident
Sbjct tlnggitdmltelanfeknvsqaihkynayrkaasviakyphkiksgaeakklpgvgtki 60
DSSP 111hhhhhhhhhhhhhhhhhh1111hhhhhhhhhhhhhhhh111111hhhhh11111hhh

DSSP -----111111111hh
Query -----aapyspntlr 12
ident
Sbjct aekideflatgklrklekirqddtssinfltrvsgigpsaarkfvddegiktledlrkne 120
DSSP hhhhhhhhh111hhhhhhhh1hhhhhhhh111111hhhhhhhh11111hhhh11h

DSSP hhhhhhhhhhh1111hHHHHHHHHHHHHHHHHL-LLLLLLLLLEEEHHHHHHHHhh11
Query slrdrltqvaerqgvvfGRLQRHVAXIVVAQFAAT-LTDDTGAPLLLKVGSSLELrgi 71
ident
Sbjct dklnhhqrigrkyfgdfEKRIPREEMLMQDIVLNeVKKVDSEYIATVCGSFRRGA---- 176
DSSP hh11hhhhhhhh1hhhhLLEEEHHHHHHHHHHHHHHHHHLLLEEEELHHHHLLL----

DSSP 1111LLLLLEEEEL-----1LHHHHHHHHHHHHhh1111eEEELLEEL11111L
Query pdsrTSKDFATVAR-----rDIELIHEQLADAGetwegftAIFTAPEElaapxpV 123
ident
Sbjct ---eSSGDMDVLLThpsftseskLLHQVVEQLQKVH-----FITDTLSKG-----E 219
DSSP ---1EELLEEEEEE11111111HHHHHHHHHHHLL-----LEEEEEEEL-----L

DSSP LEEEEEEEEEE11eEEEEEEEEEEEL-LLLL1111eeeeelhhhh111111eeeeelhh
Query KPRRFTAKLSYrgrAFATVPIEVSSV-EAGNadqfdtltsdalglvgvpaavavpcxtiP 182
ident
Sbjct TKFMGVCQLPS---EYPHRRIDIRLIpKDQY-----yC 249
DSSP LEEEEEEELLLL---LLLLEEEEEEEL1HHHH-----hh

DSSP HHHhhhhhhhh111111111111HHHHHHHH-----hhh11hHHHHHHhhHHHHhhhh
Query WQIaqklhavtavlepkandraHDLVDLQL-----legllldADLXPtrSACIAife 235
ident
Sbjct GVL-----yftgSDIFNKNMrahtinkytirplgEPLPV--DSEKD--- 288
DSSP HHH-----hhh1LHHHHHHhh111111111111LLLL--LLHHH---

DSSP hh1111LLLL111111hhhhhhhh1111111111hhhhhhhhhhhhhhhh1111
Query araqhpWPPRvatlphwpliayaglegldhlelartvdaaaqavqrfvaridratkr 292
ident
Sbjct ----ifDYRE-----pkdrse 300
DSSP ----hhLLLL-----hhh111
```

No 418: Query=mol1A Sbjct=5dedB Z-score=5.7

[back to top](#)

```
DSSP 111111111hhhhhhhhhhhhhhhhhhLLLLHHHHHHHHHHHHHHHHHLL--LLL---LL
Query aapyspntnrslrdrltqvaerQGVVFGRLQRHVAXIVVAQFAATLT--DDTG---AP 55
ident
Sbjct -----dKQWERFLVPYRQAVEELKVKLGIRt1YEYEdhSP 37
DSSP -----1HHHHHHHHHHHHHHHHHHHHHHHHHHhhHHL1111L

DSSP LEEEEhhHHHHhh11LLLL-----1LLEEEEL--LHHHHHHHH
Query LLLVKggSSELElrrgIPDSR-----tSKDFATVARR--DIELIHEQL 95
ident
Sbjct IEFVT--GRVK---PVASIlekarrksiplheietmqDIAGLRIMCQFvdDIQIVKEML 91
DSSP LLEE--EEEL---LHHHHhhhh111111111111LEEEEEEELhhHHHHHHHH

DSSP HHHhh1111eEEELLEEL---LLLL11LEEEEEEEEL---1EEEEEEEEEEEL
Query ADAGetwegftAIFTAPEE1---AAPGXpvKPRRFTAKLSYR---gRAFATVPIEVSSV 149
ident
Sbjct FARK-----DFTVVDQRDYiaehKESG-yRSYHLVLYPLQtvsgEKHVLVEIQIRTL 143
DSSP HLL-----LLEEEEEEEL111LLLL-1LLEEEEEEEEL1111EEEEEEEEEEEH
```

DSSP -----  
Query EagnadqfdtltsdalglvgvpaavavpcxtipwqiAQKLHAVTAveepkandrahdlv 209  
ident  
Sbjct A-----mnfWATIEHSLN----- 156  
DSSP H-----hhhHHHHHHHH-----

DSSP hhhhhhhh1hhhhhhhhhhhhhhHHHH111111111111hhhhhhhh11111111  
Query dlqllegllldadlxptrsaciaiFEARaqhpwpprvatlphwpliyagalegldhlela 269  
ident  
Sbjct -----yksgnkvklrLQRA----- 171  
DSSP -----h11111hhhhHHHH-----

DSSP 1hhhhhhhhhhhhhhhh1111  
Query rtvdaaaqavqrfvaridratkr 292  
ident  
Sbjct ---seaasrldeemseirgevaa 191  
DSSP ---hhhhhhhhhhhhhhhh111

No 419: Query=mol1A Sbjct=4qziA Z-score=5.7

[back to top](#)

DSSP -----  
Query ----- 0  
ident  
Sbjct kkisqyacqrtrtlnnynqlftdaldilaendelrenegsclafmrassvkslpfpits 60  
DSSP 11111hhhh11111111hhhhhhhhhhhhhhhh11hhhhhhhhhhhhhh111111

DSSP -----  
Query ----- 0  
ident  
Sbjct mkdteqipclgdkvksiegiiedgesseakavlderyksfklftsvfvgvlgktaekwf 120  
DSSP hhhh111111hhhhhhhhhhhh11hhhhhhhh1hhhhhhhhhh111111hhhhhhhh

DSSP ---1111111111hhhhhhhhhhhh111hHHHHHHHHHHHHHHHHLL-LLLLLLL  
Query ---aapyspntlrsldrldtqvaerqgvvfGRLQRHVAXIVVAQFAATL-TDDTGAPL 56  
ident  
Sbjct rmgfrtlskiqsdkslrftmqkagflyyedIVSCVNRPEAEAVSMLVKEAVTFPLPDAL 180  
DSSP h11111hhhhhh11111111hhhhhhhh1hhhhHLEEHHHHHHHHHHHHHHHHLLLE

DSSP EEEEEHHHHHHhh111111LLEEEEEEEL-----1LHHHHHHHHHHHHhh1111e  
Query LLVKGGSLELrrgipdsrTSKDFATVAR-----rDIELIHEQLADAGetgwegf 106  
ident  
Sbjct VTMTGGFRRGK-----mTGHVDVDFLITspeatedeeqLLHKVTDfWKQGG----- 226  
DSSP EEELHHHHLLL-----1EELEEEEEE11111hhhhhhHHHHHHHHHHLL-----

DSSP eeEELLEELL111111LLEEEEEEEEL--1EEEEEEEEEEEL-LLLL1111eeeee1  
Query taIFTAPEEIAapgxpkPRRFTAKLSYR--gRAFATVPIEVSSV-EAGNadqfdtltsd 163  
ident  
Sbjct --LLLYCDILE-----AQKCFILKLDHGRvGKGWKAIRVDLVMCPYDRR----- 269  
DSSP --LEEEEEEEL-----LEEEEEEHEHH11LEEEEEEEL1HHHH-----

DSSP hhhh111111eeeee1hHHHHhhhhhh111111111111HHHHHH-----  
Query alglvgvpaavavpcxtipWQIaqkIhavtavleepkandraHDLVDLQ----- 212  
ident  
Sbjct -----aFALL-----gwtgSRQFERDlrryatherkm 296  
DSSP -----hHHHH-----hhh1LHHHHHHhhhhhhhhle

DSSP ---hhhh1hhhhhhhhHHHHhhhhhh1111LLLLL1111hhhhhhhh11111111  
Query ---llegllldadlxptrSACIaifearaqhpWPPRVAtlphwpliyagalegldhlela 269  
ident  
Sbjct mldnhalydrtkrvfleAESEE-----eifAHLGLD----- 327  
DSSP ee1111ee1111eee1LLLHH-----hhHHHLLL-----

DSSP 1hhhhhhhhhhhhhhhh1111  
Query rtvdaaaqavqrfvaridratkr 292  
ident

No 420: Query=mol1A Sbjct=3hiyB Z-score=5.6

[back to top](#)

```
DSSP 1111111111hhhhhhhhhhhhhh11LLHHHHHHHHHHHHHHHHHHLL111111LLEEEE
Query aapyspntnlrslrdrltqvaerqgVVFGRlQRHVAXIVVAQFAATLtdtgaPLLVK 60
ident
Sbjct -----vakrefirgxxahyraslpPPEHSVVIHELQKRVLDIGXLA-----vNKAHVE 48
DSSP -----1hhhhhhhhhhhhhh1111LLHHHHHHHHHHHHHHHHHH-----1LLEEEE
```

```
DSSP HHhhhhhhhh11111111LLEEEEEEL-----1LHHHHHHHHHHHHHHHH1111EE
Query GGsslelrrgipdsrtsKDFATVAR-----rDIELIHEQLADAGETGwegFT 107
ident
Sbjct LF--gshvsgfctphsdADISLTYRnfspwlgqxervdeQNNKRXTRFGKEASAX---GX 103
DSSP EE--1hhhh11111111EEEEEEEL111hhhh111hhhhHHHHHHHHHHHHHHHH--LL
```

```
DSSP EEELLEEL11111111LEEEEEEEElleEEEEEEEEEl1111111leeeehhhh
Query AIFTAPEElaapgxpkPRRFTAKLSYrgrAFATVPIEVSSveagnadqfdtlttsdalgl 167
ident
Sbjct EDVRYIRAR-----IPVQFTDGV---TGIHCDVSIG----- 132
DSSP EEEEEELL-----LLEEEELL-----LLEEEEEEEL-----
```

```
DSSP 11111leeeehhhhhhhHHHHHHhh1111111LLLhHHHHHHHHHHhh11hhhhhhhh
Query vgpaavavpcxtipwqiaQLHAVtavleepkaNDRAhdldlqllegl1ldadlxptr 227
ident
Sbjct -----niggvENSKIL-----CAIR----- 147
DSSP -----1hhhhHHHHHH-----HHHH-----
```

```
DSSP hhhhhhhhhhh111111111111LHHHHHHHHHL-1LLL-----111
Query saciaifearaqhpwrpvtlphWPLIYAGALE-gLDHL-----ela 269
ident
Sbjct -----qVFPDFYGAYIHlvKAWGkareviaperstfnsftvt 185
DSSP -----hLHHHHHHHHHHhhHHHHhh11111hhhh1111hhhhhh
```

```
DSSP 1LHHHHHH-----
Query rTVDAAAQ----- 277
ident
Sbjct xALXVLQElgllpvfskptgefgeftvadaexllqefklppiydshdddeklgeavffc 245
DSSP hHHHHHHHH111111111111111111hhhhhhhhhh1111hhhh1111hhhhhhhhhh
```

```
DSSP -----hHHHHHHHHhHLLL-----
Query -----aVQRfVARidRATK----- 291
ident
Sbjct lqrfaeeyakydfsgatvsLIHPRRHRtVYERvvrhlellgsrkrlewekhiaehkedg 305
DSSP hhhhhhhhhhh1111111111111111111111111111111111111111111111111
```

```
DSSP -----
Query ----- 291
ident
Sbjct pldendfsasxnettqrpsnsyvvdfvnyvncgrrvqasrvrhiqqefnrlrexlid 365
DSSP 111hhhhhhhhhhhhhh11111111111111111111111111111111111111111111111
```

```
DSSP -----1
Query -----r 292
ident
Sbjct keselkfdevfresdtv 382
DSSP 1hh11hhhh111111
```

No 421: Query=mol1A Sbjct=4nktA Z-score=5.6

[back to top](#)

```
DSSP 1111111111hhhhhhhhhhhhhh11LLHHHHHHHHHHHHHHHHHHLL111111LLEEEE
```

```

-----dmshkeftkfcyevyneikiSDKEFKEKRAALDTLRLCLKRIS-----PDAELV 49
DSSP -----1111hhhhhhhhhhhh11LHHHHHHHHHHHHHHHHHHHLLL-----LLEEEE

DSSP HHHhhhhhh11111111LLEEEEE11hhHHHHHHHHHHHLL11eEEEELLEe11111
Query GGsslelrrgipdsrtsKDFATVArddieLIHEQLADAGETGwegfTAIFTAPEeiaapg 120
ident | |
Sbjct AF--gslesglalknsdMDCVLM-----TIALQFYEEELIAE----GFEGKFLQ----- 92
DSSP EE--1hhhh11111111EEEEEL-----LHHHHHHHHHHHLL-----LEEEEELL-----

DSSP 111LLEEEEEEEEEEL--1EEEEEEEEEEe1111111111eeeeelhhhh111111eeee
Query xpvKPRRFATAKLSYR--gRAFATVPIEVSSveagnadqfdt1tsdalglvgvpaavavpc 178
ident | |
Sbjct -raRIPIIKLTSDTKngfGASFQCAIGFN----- 120
DSSP -111LLEEEEEELL111LLEEEEEEL-----

DSSP 11hhhhhhHHHHHH11111111L11LHHhhhhhhhhhh11hhhhhhhhhhhhhhhhhh1
Query xtipwqiaQKLHAVtavleepkaNDRAhdldvdlqleg11ldadlxptrsaciaifeara 238
ident | |
Sbjct ----nr1aIHNTLL-----LSSY----- 134
DSSP ----1hhHHHHHH-----HHHH-----

DSSP 1111111111LHHHHHHHHHLL-LLLL-----1111LHHHHHH---
Query qhpwpprvatlpHWPLiYAGALEG-LDHL-----elarTVDAAAQ--- 277
ident | |
Sbjct -----tkLDAR-LKPMVLLvKHWAKrkqinspyfgt1ssygyvlmVLYYLIVvik 183
DSSP -----hhHLLL-HHHHHHHhHHHHhh1111hh1111hhhhhhHHHHHH111

DSSP -----
Query ----- 277
ident | |
Sbjct ppvfpn111splkqekivdgvfdgddkledippsqnysslgsllhgffrfyaykfepre 243
DSSP 1111111111111111eellee111111hh11111111hhhhhhhhhhhh111111

DSSP --hhHHHH--hhhHLLL-----
Query --avQRFV--aridRATKR----- 292
ident | |
Sbjct kvvtFRRPdgytlkqEKGWTSryilaiedpfeishnvgrtvsssglyrirgefmaasr11 303
DSSP 1111L1111111hhHLLL1111111111111111111111111111hhhhhhhhhhhhhhhh

DSSP -----
Query ----- 292
ident | |
Sbjct nsrsypipyds1feea 319
DSSP 11111111hhhh111

```

No 422: Query=mol1A Sbjct=4nkuA Z-score=5.6

[back to top](#)

```

DSSP 1111111111hhhhhhhhhhhh11LHHHHHHHHHHHHHHHHHHHLLL11111LLEEEE
Query aapyssptnlrslrdrltqvaerqVVFGR1QRHVXIVVAQFAATLTddtgaPLLLVK 60
ident | |
Sbjct -----dmshkeftkfcyevyneikiSDKEFKEKRAALDTLRLCLKRIS-----PDAELV 49
DSSP -----1111hhhhhhhhhhhh11LHHHHHHHHHHHHHHHHHHHLLL-----LLEEEE

DSSP HHHhhhhhh111L111111LLEEEEE11hhHHHHHHHHHHHLL11eEEEELLEe11
Query GGsslelrrgipDSRT--sKDFATVArddieLIHEQLADAGETGwegfTAIFTAPEeia 117
ident | |
Sbjct AF-----gslesGLALknsdMDCVLM-----TIALQFYEEELIAE----GFEGKFLQR-- 94
DSSP EE-----1hhhhLLL1111EEEEEL-----LHHHHHHHHHHHLL-----LEEEEELL--

DSSP 111111LLEEEEEEEEEELLE--EEEEEEEEEEe1111111111eeeeelhhhh111111ee
Query apgxvKPRRFATAKLSYRGR--AFATVPIEVSSveagnadqfdt1tsdalglvgvpaava 175
ident | |
Sbjct -----aRIPIIKLTSDTKNGfGASFQCAIGFN----- 121
DSSP -----1LLEEEEEELL11LLEEEEEEL-----

```



DSSP eeellhhhhhhHHHHHHHh1111111LLLhHHHHHHHHHHh11hhHHHHHHHHHHHH  
 Query vpcxtipwqiaQKLHAVtavleepkaNDRAhdldvlqllegllldadlxptrsaciaife 235  
 ident  
 Sbjct -----nrIaIHNTLL-----LSSY----- 135  
 DSSP -----lhhhHHHHHH-----HHHH-----

DSSP hh1111111111111111HHHHhHHHLLL-LLLL-----111LHHHHH  
 Query araqhpwpprvatlphWPLIYAAGALEGL-DHLE-----larTVDAAA 276  
 ident | |  
 Sbjct -----tkLDAR-LKPMVLLvKHWAKrkqinspyfgtLssygyvlmVLYYL 180  
 DSSP -----hhHLLL-HHHHHHHhHHHHhh1111hh1111hhHHHHHHHHHH

DSSP H-----  
 Query Q----- 277  
 ident  
 Sbjct Hvikppvfpnllspltkqekivdgfdvgfdkledippsqnysslgsllhgffrfyaykf 240  
 DSSP H111111111111111111ee11ee11111hh111111hhHHHHHHHHHHHHh11

DSSP -----hhHHHH---hhhHLLL-----  
 Query -----avQRFV---aridRATKR----- 292  
 ident |  
 Sbjct eprekvtFRRPdgyltkqeKGWTSryilaiedpfeishnvgrtvsssglyrirgefmaa 300  
 DSSP 1111111LLL1111hhHLLL1111111111111111111111hhHHHHHHHHHHHH

DSSP -----  
 Query ----- 292  
 ident  
 Sbjct srllnrsypipydsifeea 320  
 DSSP hhhhh111111hhHHHh11

No 423: Query=mol1A Sbjct=3wfpH Z-score=5.6

[back to top](#)

DSSP 111111111hhHHHHHHHHHHHH1111hhHHHHHHHHHHHHHHHHHHLLL11LLLEEEE  
 Query aapyspntlrslrdrltqaerqgvfgrlqrhvaxIVVAQFAATLTDdtGAPLLLVK 60  
 ident |  
 Sbjct -----lnfyLSYFDDVAKVLP--REHYCFIV 24  
 DSSP -----1111LHHHHHHHHHL--LLEEEEE

DSSP HHHHHHHHHLLL11111LEEEEEELLLLHHHHHHHHHHHHHHh1111eeEELLEEL1111  
 Query GGSSLELRGIPdsrtsKDFATVARRDIELIHEQLADAGetgwegftaIFTAPEElaapg 120  
 ident || | | | | | | |  
 Sbjct GGWVRDRILGEP~vgynIDVDFLTTADPVELAKNFAKRI-----GGHFFVFE---- 70  
 DSSP LHHHHHHHLLL-111eEEEEEEEELLLHHHHHHHHHHHHHH-----LLEEEEL----

DSSP 11LLEEEEEEEeelleEEEEEEEEEL----LLL-----1111EEE  
 Query xpVKPRRFTAKLsyrgRAFATVPIEVSSV----EAGN-----adqfDTL 160  
 ident | | | | | | | | | | |  
 Sbjct --PTIASVVLHL-----PPYRYRFDfSPLkgkd1EKALiedlkerdftanaiaavnldV 123  
 DSSP --LLEEEEEEL----LLEEEEEEEEEL1111hHHHHHHhh1111hh1leeehhHHH

DSSP Eelhhhh11111leeeelLHHH-----hhhhhhhHHH1111111LLLHhhh  
 Query TsdalglvgvpaavavpcxTIPW-----qiaqklhAVTAvleepkaNDRAhdv 209  
 ident |  
 Sbjct S-----igakqtivYDptggikdleqglrpvsieNLKR-----dPVRVL--- 163  
 DSSP L-----111111EELL11hhHHHh1leel11hhHHHH-----1LHHH----

DSSP hhhHHHH11hhHHHHHHHHHHHHHH11111111111hhHHHHHLLL11111  
 Query dlqllegllldadlxptrsaciaifearaqhpwpprvatlphwpliYAGALEGLDhlela 269  
 ident  
 Sbjct -----RGFRIAIEKN----1 174  
 DSSP -----HHHHHHHHHL----1

DSSP LLHHHHHHHHHH-----  
 Query RTVDAAAQAVQR----- 281

```

DSSP  EELHHHHHHHHHH1hhhhhh1lhhhhhhhhhhhh1lhhhhhhhhhh1lhhhhhhhhhh1lhhhhhhhhhh
-----
DSSP  -----
Query  ----- 281
ident  -----
Sbjct  lrevkdpldehtlktleyleqviedrakylsaellenfgkkrvlgeftdveillkwgalfh 294
DSSP  hh11111hhhhhhhhhhhhhhhhhh1lhhhh1lhhhh11111lee111eehhhhhhhhhh1l
-----
DSSP  -----
Query  ----- 281
ident  -----
Sbjct  digkpgtftvfyehdkvgaqivreigerlrgwdeatefvaklvrhhlrpfllreafkkge 354
DSSP  1111111111111hhhhhhhhhhhhhhhh1l111hhhhhhhhhhhh1l111hhhhhhhhhh1l
-----
DSSP  -----hhhhhh1111
Query  -----fvaridratkr 292
ident  -----
Sbjct  lkrngmanfwrecgdiaphlfl1siadamasgdeeedikalmetiaelesfnrnemk 411
DSSP  11hhhhhhhhhh1111hhhhhhhhhhhhhh1111hhhhhhhhhhhhhhhhhh1111

```

No 424: Query=mol1A Sbjct=4e7xD Z-score=5.6

[back to top](#)

```

DSSP  1111111111hhhhhhhhhhhh11LLHHHHHHHHHHHHHHHHHHLL11111LLEEEE
Query  aapyspntlrslrdrltqvaerqgVVFGRQLQRHVAXIVVAQFAATLTddtgaPLLVK 60
ident  |
Sbjct  -----hkeftkfcyevyneikiSDKEFKEKRAALDTLRLCLKRIS-----PDAELV 46
DSSP  -----1hhhhhhhhhhhh11LHHHHHHHHHHHHHHHHHHHLL-----LLEEEE
-----
DSSP  hhHHHHhh1111LLL----1LLEEEEEEL1hhHHHHHHHHHHHH111eEEEELLEE1
Query  ggSLElrrgipDSRT----sKDFATVARRdieLIHEQLADAGETGwegfTAIFTAPEEi 116
ident  |
Sbjct  --AFGS----leSGLA1knsdMDLVCVLMDD---TIALQFYEELIAE---GFEGKFLQR- 92
DSSP  --EELH----hhHLLL11111EEEEELL---LHHHHHHHHHHHLL---LLEEEEEEE-
-----
DSSP  111111LLEEEEEEEEE1leeEEEEEEEEe111111111eeeee1hhhh11111lee
Query  aapgxpVKPRRF TAKLSYrgraFATVPIEVSSveagnadqfdtlttsdalglvgvpaav 176
ident  |
Sbjct  -----ARIP1IKLTSDT----SFQCDIGFN----- 113
DSSP  -----LLEEEEEEEELL---LLEEEEEEL-----
-----
DSSP  eel1hhhhhhhhhhhh1111111111hHHHHhhhhhh1lhhhhhhhhhhhhhhhh
Query  pcxtipwqiaqklhavtavleepkandrahDLVDlqllegllldadlxptrsaciaifea 236
ident  |
Sbjct  -----nrlaihntLLLS----- 125
DSSP  -----1hhhhhhHHHH-----
-----
DSSP  h1111111111111111HHHHhHHHLL--LLL-----1LLLHHHHHH
Query  raqhpwprvatlphWPLIyAGALEG--LDHL-----eLARTVDAAAQ 277
ident  -----
Sbjct  -----sytkLDAR-LKPMVllvKHWakrkqinspyfgt1ssygyVLMVLYYLIH 173
DSSP  -----hhhHLLL-HHHHHhhHHHHhh1111lhh1111hhhhHHHHHHHH
-----
DSSP  -----
Query  ----- 277
ident  -----
Sbjct  vikppvfnl11splkqekivdgvfdgddkledippsqnysslgsl1hgffrfyaykfe 233
DSSP  11111111111111111lee1lee11111hh1111111111hhhhhhhhhhhh11
-----
DSSP  ----hhHHHH----hhhHLLLL-----
Query  ----avQRFV----ariDRATKR----- 292
ident  |
Sbjct  prekvvtFRRPdgyltkqEKGWTSatehdryilaiedpfeishnvgrtvsssglyrige 293
DSSP  1111ee1LLLL1111hhHLLLL1111111111ee1111111111111111hhhhhhhhhh

```

```

Query ----- 292
ident
Sbjct fmaasrllnsrsypipydsiffeeapip 320
DSSP hhhhhhhh11111111hhhhh111111

```

No 425: Query=mol1A Sbjct=5dedH Z-score=5.5

[back to top](#)

```

DSSP 1111111111hhhhhhhhhhhhHLLLLHHHHHHHHHHHHHHHHHHHLLL----1LLLLL-
Query aapyssptnlrslrdrltqvaerQGVVFGRLQRHVAXIVVAQFAATLT----dDTGAP- 55
ident |
Sbjct -----DKQWERFLVPYRQAVEELKVKLKGIRtlyeyEDDHSp 37
DSSP -----LHHHHHHHHHHHHHHHHHHHHHHHHHHHHhh111LLLLL1

```

```

DSSP LEEEEhhHHHHhh11LLLLL-----1LLEEEEEELL--LHHHHHHHH
Query LLLVKggSSLElrrgIPDSR-----tSKDFATVARR--DIELIHEQL 95
ident | | |
Sbjct IEFVT--GRVK---PVASIlekarrksiplheietmqdIAGLRIMCQFvdDIQIVKEML 91
DSSP LLEE--EEEL----LHHHHhhhhhh1111hhhhh111LEEEEEELLhhHHHHHHHH

```

```

DSSP HHHHhh1111eEEEELLEEL--LLLL111LLEEEEEEEEL---1EEEEEEEEEEEL
Query ADAGetgwegfTAIFTAPEEi--AAPGXpVKPRRFTAKLSYR---gRAFATVPIEVSSVE 150
ident | |
Sbjct FARK-----DFTVVDQRDYiaEHKEsgyRSYHLVVLVPLQtvsqEKHVLVEIQIRTLA 144
DSSP HLLL-----LLEEEEEEL11LLLL111LLEEEEEEEEL1111LEEEEEEEEEHH

```

```

DSSP 11111111eeeelhhhh11111111eeeelhhhhHHHHHHHHL1111111111hhhhh
Query agnadqfdtldsdaIglvgpaavavpcxtipwqiAQLHAVTAvleekandrahdlvd 210
ident
Sbjct -----mfwATIEHSLN----- 156
DSSP -----hhHHHHHHHHHH-----

```

```

DSSP hhhhhhh11hhhhhhhhhhhhhhhh11111111LLLLLHhhhhhhhh1111111111
Query lqllegl1ldadlxptrsaciaifearaqhpwpprVATLPHWpliyagalegldhlelar 270
ident
Sbjct -----ykysGNIPEKV-----klrlq 172
DSSP -----hh1LLLLLHHH-----hhhhh

```

```

DSSP 1hhhhhhhhhhhhhhhh1111
Query tvdaaaqavqrfvaridratkr 292
ident
Sbjct raseaasrldeemseirgevaa 194
DSSP hhhhhhhhhhhhhhhhh1111

```

No 426: Query=mol1A Sbjct=4e8fA Z-score=5.5

[back to top](#)

```

DSSP 1111111111hhhhhhhhhhhhhh1LLLLHHHHHHHHHHHHHHHHHLLL11111LLEEEE
Query aapyssptnlrslrdrltqvaerqGVVFGRLQRHVAXIVVAQFAATLTddtgaPLLVK 60
ident | |
Sbjct -----pnshkeftkfcyevyneikISDKEFKEKRAALDTLRLCLKRIS-----PDAELV 49
DSSP -----1111hhhhhhhhhhhh11LHHHHHHHHHHHHHHHHHHHHL-----LLEEEE

```

```

DSSP HHHhhhhhh11111111LLEEEEEELL1HHHHHHHHHHHHHHL111eEEEELLEE11111
Query GGsslelrrgipdsrtsKDFATVARRdIELIHEQLADAGETGwegfTAIFTAPEEiaapg 120
ident | | |
Sbjct AF--gslesglalknsdMDLCVLMDS--SDTIALQFYEEELIAE----GFEGKFLQR----- 97
DSSP EE--1hhhh11111111LEEEEEELL--LLHHHHHHHHHHHHL-----LEEEEEEE

```

```

DSSP 111LEEEEEEEEL--EEEEEEEEEEe1111111111eeeelhhhh11111e
Query xpvKPRRFTAKLSYRG--RAFATVPIEVSveagnadqfdtldsdaIglvgpaavavpc 178
ident |
Sbjct --aRIPIIKLTSDTKNgfGASFQCDIGFN----- 124

```

DSSP 11hhhhhhHHHHHH11111111LLLhhhhhhhhhhhh11hhhhhhhhhhhhhhhh1  
Query xtipwqiaQKLHAVtavleepkaNDRAhdldvlqlllegllldadlxptrsaciaifeara 238  
ident  
Sbjct ----nr1aIHNTLL-----LSSY----- 138  
DSSP ----1hhhHHHHHH-----HHHH-----

DSSP 111111111111LHHHhHHHHHL-LLLL-----1111LHHHHHH---  
Query qhpwpprvatlphWPLiYAGALEG-LDHL-----elarTVDAAAQ--- 277  
ident  
Sbjct -----tkLDAR-LKPMVLLvKHWAKrkqinspyfgtlssygyvlmVLYYLIVhik 187  
DSSP -----hhHLLL-HHHHHHHhHHHHhh111111111111hhhhhhHHHHHH111

DSSP -----  
Query ----- 277  
ident  
Sbjct ppvfpnlllspkqekivdgvfdvdkledippsqnysslglshgffrfyaykfepre 247  
DSSP 11111111111111leelle111111hh11111111hhhhhhhhhhhh11111

DSSP --hhHHHH--hhhHLLL-----  
Query --avQRFV--aridRATKR----- 292  
ident  
Sbjct kvvtFRRPdgytlkqEKGWtsdryilaiedpfeishnvgrtvsssglyrirgefmaasrl 307  
DSSP leelLLL11111hhHLLL11111leel111111111111hhhhhhhhhhhhhhhh

DSSP -----  
Query ----- 292  
ident  
Sbjct Inrsypipyds1feeapip 327  
DSSP h11111111hhhh111111

No 427: Query=mol1A Sbjct=4e7xA Z-score=5.5

[back to top](#)

DSSP 1111111111hhhhhhhhhhhh11LHHHHHHHHHHHHHHHHHHLL11111LLEEEE  
Query aapyspntnlrsldr1tqvaerqgVVFGRlQRHVAXIVVAQFAATLTddtgaPLLLVK 60  
ident  
Sbjct -----hkeftkfcyevyneikiSDKEfKEKRAALDTLRLCLKRIS-----PDAELV 46  
DSSP -----1hhhhhhhhhhhh11LHHHHHHHHHHHHHHHHHHHL-----LLEEEE

DSSP HHhhhhhh1111LLL-----LLEEEEEEL1hHHHHHHHHHHHHHL11leEEEELLEEL  
Query GGsslelrrgipDSRT----sKDFATVARrdiELIHEQLADAGETGwegfTAIFTAPEEi 116  
ident  
Sbjct AF-----gsleSGLA1knsdMDLCVLM---DTIALQFYEEELIAE----GFEGKFLQR- 92  
DSSP EE-----1hhHLLL11111EEEEEEEL---LLHHHHHHHHHHHL---LEEEEEEE-

DSSP 111111LLEEEEEEEe1LEEE--EEEEEEe11111111eeee1hhhh11111e  
Query aapgxpvKPRRFTAKLSyrGRAF--ATVPIEVSSveagnadqfdt1tsdalglvgvpaav 174  
ident  
Sbjct -----ARIPIIKLTS--TGFGasFQCDIGFN----- 117  
DSSP -----LLEEEEEEE--LLLL11LLEEEEL

DSSP eeee1hhhhhhhhhhhh11111111LLLhhhhhhhhhhhh11hhhhhhhhhhhhhh  
Query avpctipwqiaqklhavtavleepkaNDRAhdldvlqlllegllldadlxptrsaciaif 234  
ident  
Sbjct -----nr1aihnt1LSSY----- 131  
DSSP -----1hhhhhhhhHHHH-----

DSSP hhh111111111111LHHHhHHHHHL-LLLL-----1LLLHHHHH  
Query earaqhpwpprvatlphWPLiYAGALE-gLDHL-----eLARTVDAAA 276  
ident  
Sbjct -----tkLDAR-LKPMVLLvKHWAKrkqinspyfgtlssygyVLMVLYLI 176  
DSSP -----hhHLLL-HHHHHHHhHHHHhh11111hh1111hhhhHHHHHHHH

DSSP H-----

-----  
Sbjct Hvikppvfpnlllsplkqekivdgdvdfddkledippsqnysslgslhgfrrfyaykf 236  
DSSP Hllllllllllllllllllllleelleellllllllhhllllllllllhhhhhhhhhhhhhhll

DSSP -----hhHHHH-----hhhhLLLL-----  
Query -----avQRFV-----aridRATKR----- 292  
ident |  
Sbjct eprekvvtFRRPdgyltkqEKGWTSdryilaiedpfeishnvgtrtvsssglyrirgefma 296  
DSSP lllllelLLLLllllhhhhLLLLllllleellllllllllllllllhhhhhhhhhhhhhhhh

DSSP -----  
Query ----- 292  
ident |  
Sbjct asrllnsrsypipydslf eeapi 319  
DSSP hhhhhllllllllhhhhllllll

No 428: Query=mol1A Sbjct=4e80B Z-score=5.5

[back to top](#)

DSSP lllllllllllhhhhhhhhhhhhhhllllllHHHHHHHHHHHHHHHHHHLLLLllllllLEEEEE  
Query aapyspntnlrslrdrltqvaerqGVVFGRLQRHVAXIVVAQFAATLTDdtgaPllLVK 60  
ident |  
Sbjct -----hkeftkfcyevyveikISDKEFKEKRAALDTRLRCLKRIS-----PDAELV 46  
DSSP -----lhhhhhhhhhhhhhhllHHHHHHHHHHHHHHHHHHHHLLLL-----LLEEEE

DSSP HHhhhhhhhllllllllLEEEEEELllhHHHHHHHHHHHHHHHHllleEEEELLLEEllllll  
Query GGsslelrrgipdsrtsKDFATVARrdiELIHEQLADAGETGwegfTAIFTAPEEiaapg 120  
ident | |  
Sbjct AF--gslesglalknsdMDLCVLMd---DTIALQFYEEELIAE---GFEGKFLQR----- 92  
DSSP EE--lhhhhllllllllLEEEEEEL---LHHHHHHHHHHHHHH---LLEEEEEEE-----

DSSP lllLEEEEEEEeelleeEEEEEEeellllllllleeeellhhhhllllleeeell  
Query xpvKRRFTAKLsyrgrafATVPIEVSSveagnadqfdltsdalglvgvpaavavpct 180  
ident |  
Sbjct --aRIPiIKLTS-----FQCDIGFN----- 110  
DSSP --lLEEEEEEEEL-----LEEEEEEL-----

DSSP hhhhhHHHHHHhhllllllllllLllhhhhhhhhhhhhllhhhhhhhhhhhhhhhhll  
Query ipwqiaQKLHAVtavlepkANDRAhdldlqllegllldadlxptrsaciaifearaqh 240  
ident |  
Sbjct --nrlaIHNTLL-----LSSY----- 124  
DSSP --lhhhhHHHHHH-----HHHH-----

DSSP lllllllllllHHHHhHHHHLLL-LLLL-----llllHHHHHH-----  
Query pwpprvatlphWPLIyAGALEGL-DHLE-----larTVDAAAQ---- 277  
ident | |  
Sbjct -----tkLDAR-LKPMVLLvKHWAKrkqinspyfgtlssygyvlmVLYYLIVhikp 174  
DSSP -----hhLLLL-HHHHHHHHHHHHHhhllllllhhllllllhhhhhhHHHHHHHHllll

DSSP -----  
Query ----- 277  
ident |  
Sbjct pvfnpnlllsplkqekivdgdvdfddkledippsqnysslgslhgfrrfyaykfeprek 234  
DSSP lllllhhhhllllllleelleellllllllhhhhllllllllllhhhhhhhhhhhhhhllllll

DSSP -hhHHHH-----hhhhLLLL-----  
Query -avQRFV-----aridRATKR----- 292  
ident |  
Sbjct vvtFRRPdgyltkqEKGWTSryilaiedpfeishnvgtrtvsssglyrirgefmaasrlln 294  
DSSP lllllllllllhhHHLLLLllllllllllllllllllllllllhhhhhhhhhhhhhhhhhh

DSSP -----  
Query ----- 292  
ident |  
Sbjct srsypipydslf eeapi 311  
DSSP lllllllhhhhllllll

No 429: Query=mol1A Sbjct=4lzdA Z-score=5.5

[back to top](#)

```
DSSP -----
Query ----- 0
ident
Sbjct wmpayacqrptplthntglsealeilaeagfegsegrlltfcraasvkalpsvttl 60
DSSP 11111hhhh1111111111hhhhhhhhhhhhhhhh111hhhhhhhhhhhhhhhh111111h

DSSP -----
Query ----- 0
ident
Sbjct sqlqglphfgehssrvvqellehgyceeverrrseryqtmklftqifgvvktadrwyr 120
DSSP hhh1111111hhhhhhhhhhhhhhhh111hhhhhhhhhhhhhhhhhh111111hhhhhhhh

DSSP -1111111111hhhhhhhhhhhhhh1111hhhhHHHHHHHHHHHHHL-LLLL1LLLLLEE
Query -aapyspntlrsldrtrtqvaerqgvvfrlqRHVAXIVVAQFAAT-LTDDtGAPLLL 58
ident
Sbjct eglrtlddlreqpkltqqkaglqhhqdlstpvLRSDVDALQQVVEEaVGQA1PGATVT 180
DSSP 11111hhhh11hh11hhhhhhhh1hhhh11eEHHHHHHHHHHHHHHHHH1LLLLLEE

DSSP EHHHHHHHHhh111111LLLLEEEEEL-----1LHHHHHHHHHHHHhh1111eeEE
Query VKGGSLELrrgipdsrTSKDFATVAR-----rDIELIHEQLADAGetgwegftaIF 110
ident || | | |
Sbjct LTGGFRRGK-----1QGHVDVFLIThpkegqeagLLPRVMCRLQDQG-----LI 224
DSSP ELHHHLLL-----1EELLEEEEE1111111111HHHHHHHHHHHLL-----LE

DSSP LLEELLLL-1LLLLLEEEEEEEEEELLEeEEEEEEEEEL-LLLL1111eeee1hhhh1
Query TAPEEIAAP-gXPVKPRRFTAkLSYRGRaFATVPIEVSSV-EAGNadqfdt1tsdalglv 168
ident | | |
Sbjct LYHQHQHSChmDAFERSFCIFRLPQPGS-WKAVRVDLVVApVSQF----- 268
DSSP EEEEEELLLL1111LEEEEEEEEEELLE-EEEEEEEEEEL1HHHH-----

DSSP 11111eeee1hhHHHHhhhhhhhh11111111111HHHHHHhhhh11hhhhhhhh
Query gvpaavavpcxtiPWQIaqlhavtavleekandraHDLVDLQ1leg11ldadlxptrs 228
ident |
Sbjct -----pFALL-----gwtgSKLFQRE-lrrfsrkeglwlns 299
DSSP -----hHHHH-----hhh1LHHHHHH-hhhhhhhhh1lee11

DSSP HHHH-----hHHHH--11111LLLL1111hhhhhhhhhh1111111111hhhhhhhh
Query ACIA-----iFEAR--aqhpwPPRVA1lphwpliyagalegldhlelartvdaaaqavq 280
ident | |
Sbjct HGLFdpeqktfFQAaseediFrHLGLE----- 326
DSSP LLEEe1111eeLLLL1hhhhhhHLLL-----

DSSP hhhhhhh1111
Query rfvaridratkr 292
ident
Sbjct ---ylppeqrna 335
DSSP ---111hh111
```

No 430: Query=mol1A Sbjct=3wfpB Z-score=5.5

[back to top](#)

```
DSSP 1111111111hhhhhhhhhhhhhh1111hhhhhhhhhhHHHHHHHHLLLL1111111111
Query aapyspntlrsldrtrtqvaerqgvvfrlqrhvaxIVVAQFAATLTDDtGAPLLLVK 60
ident |
Sbjct -----1nfyLSYFDDVAKVLP--REHYCFIV 24
DSSP -----11111LHHHHHHHHHLL--LLLLEEEE

DSSP HHHHHHHHHLLL11111LEEEEEELLLLHHHHHHHHHHHHhh1111eeEELLEEL1111
Query GGSSLELRRGIPdsrtsKDFATVARRDIELIHEQLADAGetgwegftaIFTAPEE1aapg 120
ident || | | |
```

```

-----
DSSP  I1LLEEEEEEEeelleEEEEEEEEEEEL----LLL-----1111EEE
Query  xpVKPRRF TAKLsyrg rAFATVPIEVSSV----EAGN-----adqfDTL 160
ident  |           |           |           |           |
Sbjct  --PTIASVVLHL----PPYRYRFD SFLk gkd1EKALiedlkerdf tanaiavnldDVL 123
DSSP  --LLEEEEEEEEL----LLEEEEEEEEL1111hHHHHhhhh1111hhlleeehhHHH

DSSP  Eelhhhh11111leeeelLHHH-----hhhhhhHHHL11111LLLHhh
Query  TsdalglvgvpaavavpcxTIPW-----qiaqklhAVTAveepkaNDRAHdlv 209
ident  |
Sbjct  S-----igakqtiVYDPtg gikdleqgllrpvsieNLKR-----dPVRVL--- 163
DSSP  L-----111111EELL11hhhhhh1le1111hhHHHH-----1LLHHH---

DSSP  hhhhhhh11hhhhhhhhhhhhhhhhhh111111111111hhHHHHHHLLL1111
Query  dlqllegllldadlxptrsaciaifearaqhpwprvatlphwplIYAGALEGLDhlela 269
ident  |
Sbjct  -----RGFRIAIEKN----1 174
DSSP  -----HHHHHHHHLL----1

DSSP  LLHHHHHHHHHH-----
Query  RTVDAAAQAVQR----- 281
ident  |
Sbjct  QLTEDFYEFVKEdprivlksaverithelfkimkektahkvirelyeygvleaiipeigr 234
DSSP  EELHHHHHHHHHH1hhhhhh11hhhhhhhhhhhh111hhhhhhhhhh11hhhh1hhhh

DSSP  -----
Query  ----- 281
ident  |
Sbjct  lrevkdpIdehtlktleyleqviedrakylsaellenfgkkrvlgef tdvellkwgalfh 294
DSSP  hh1111hhhhhhhhhhhhhhhhhh11hhhh11hhhh1111le11leehhhhhhhhh11

DSSP  -----
Query  ----- 281
ident  |
Sbjct  digkqptfvtfyehdkvgaqivreigerlrgwdeatefvaklvrrhlpfflreafkkg 354
DSSP  111111111111hhhhhhhhhhhhhhhh111hhhhhhhhhhhh111hhhhhhhhhh11

DSSP  -----
Query  ----- 281
ident  |
Sbjct  lkr rgmanfwrecgdiaphlfl1siadamasgdeeedikalmetiaefnrnemkeex 414
DSSP  11hhhhhhhhhh1111hhhhhhhhhhhh1111hhhhhhhhhhhhhhhhhh111111

DSSP  -----hhhhhh1111
Query  -----fvar idratkr 292
ident  |
Sbjct  xxxxxxxxxxxxxxxxxxxxxxxxxxxxxxxxxxxxxxxx 450
DSSP  hhhh11hhhhhhhhhhhh11hhhhhhhhhhhh11


```

No 431: Query=mol1A Sbjct=4rwoA Z-score=5.4

[back to top](#)

```

DSSP  I111111111hhhhhhhhhhHHLL--LHHHHHHHHHHHHHHHHHH--LLLLLLLLL
Query  aapyspntnlrslrdrltqvaERQG--VVFGR LQRHVAXIVVAQFAA--TLDDTGAPL 56
ident  |           |           |           |           |
Sbjct  -----melrhtpardldkfiEDHLLpNTCFRTQVKEAIDIVCRFLKerCFQGTADPVR 53
DSSP  -----11hh11hhhhhhhhHHLL11LHHHHHHHHHHHHHHHHHHh1LLLLLLLLL

DSSP  E-EEEEHHhhHHHHLLL111LLL EEEEEEL-----LHHHHHHHHHHHHHHLL--L
Query  L-LVKGGSs1ELRRGIPdsrTSKDFATVARR-----DIELIHEQLADAGETGW--E 104
ident  |           |           |           |           |
Sbjct  VsKVVKGG-sSGKGTTLrgrSDADLVVFLTKltsfedqlrRRGEFIQEIRRQLEACQreQ 112
DSSP  EeEEEEH-hHHHLLL111LLEEEEEEL111hhhhhhHHHHHHHHHHHHH11L

```

```

ident | | | | |
Sbjct KFKVTFEV-----qsprrenpRALSFVLSSPqlqqEVEFDVRPAFDALGQ----- 157
DSSP LLEEELL-----11111111LEEEEEELL1111LEEEEEELL1111-----

DSSP hhhh111111leeeel1hhhhhhhhhhhh111111111111hhhhhhhhhh11hhhh
Query alglvgvpaavavpcxtipwqiaqklhavtavleepkandrahdldlqllegl1ldadl 223
ident
Sbjct ----- 157
DSSP -----

DSSP hHHHHhhHHHHHHLL-----
Query xPTRSacIAIFEARAQ----- 239
ident
Sbjct wTPGY--KPNPEIYVQlikecksrgekegfstctfelfrdrlnrptklsrlrvkhwy 215
DSSP 1LLL--LLLHHHHHHhhhhhhhh11111hhhhhhhhhhhh111hhhhhhhhhhhh

DSSP --1111111111hHHHHHH-----hh1111111111hHHHH-----
Query --hpwpprvatlphwPLIYAG-----alegl dhlelartvDAAA----- 276
ident
Sbjct qtckkthgnklppqyALELLTvyaweqgsrktdfstaqgftvlelvkhqkLCIFweay 275
DSSP hhhhhhh111111hHHHHHHhhhhhhhh111111hhhhhhhhhhhh11hhhhLEEL1111

DSSP -----hhh
Query -----qavq 280
ident
Sbjct ydftnpvvgrcmlqllkkprpvildpadptgnvggdthswqr laqearvwlgy pcknl 335
DSSP 11111hhhhhhhhhh11111le111111111111hhhhhhhhhhhh11hhhh11

DSSP hhhhhhh1111
Query rfvaridratkr 292
ident
Sbjct dgslvgawtmlq 347
DSSP 11111111111

```

No 432: Query=mol1A Sbjct=5f2vP Z-score=5.4

[back to top](#)

```

DSSP 1111111111hhhhhhhhhhhhHLLLLHHHHHHHHHHHHHHHHHHLL--LLL--LLL
Query aapyspptnlrslrdrltqvaerQGVVFGRLQRHVAXIVVAQFAATL--TDDT--GAPL 56
ident
Sbjct -----DKQWERFLVPYRQAVEELKVKLGIRtLYEYedDHSP 37
DSSP -----LLLHHHHLHHHHHHHHHHHHHHHHHHhhHLL11LLL

DSSP -EEEEhHHHHhh11LLL-----1LLEEEELL--LHHHHHHHH
Query -LLVKggSSLElrrgIPDSR-----tSKDFATVARR--DIELIHEQL 95
ident
Sbjct iEFVT--GRVK---PVASILEkarrksiplheietmqdIAGLRIMCQVdDIQIVKEML 91
DSSP 1LEE--EEL---LHHHHhhhhhh1111hhhhhh11LEEEEEELLhhHHHHHHHH

DSSP HHHhh111leEEELLle11111111LEEEEEEEEL---IEEEEEEEEEEELL11
Query ADAGetgwegfTAIFTAPeeiaapgxpvKPRRF TAKLSYR---GRAFATVPIEVSSVEag 152
ident
Sbjct FARK-----DFTVVDQ-----RSYHLVLYPLQtvsgekHVLVEIQIRTLA-- 132
DSSP HLL-----LLEELL-----LEEEEEEEEEEel1eEEEEEEEEEEHH--

DSSP 1111leeeelhhhh11111leeeel1hhhhHHHHHHHLL1111111111hhhhhh
Query nadqfdt1tsdalglvgvpaavavpcxtipwqiaQKLHAVTAvleepkandrahdldlq 212
ident
Sbjct -----mnfWATIEHSLN----- 144
DSSP -----hhHHHHHHHH--

DSSP hhhhh11hhhhhhhhhhhhhhhh111111111111111111111111111111111h
Query l1eg11ldadlxptrsaciaifearaqhpwrVATLPHWpliyagalegl dhlelartv 272
ident
Sbjct -----ykysGNIPEKV-----klrlqras 163

```



```
DSSP hhhhhhhhhhhhhhhllll
Query daaaqavqrvaridratkr 292
ident
Sbjct eaasrldeemseirgevgea 183
DSSP hhhhhhhhhhhhhhhllll
```

No 433: Query=mol1A Sbjct=4ud4B Z-score=5.4

[back to top](#)

```
DSSP 111111111hhhhhhhhhhhhllllHHHHHHHHHHHHHHHHHHLL11111LLEEEE
Query aapyssptnlrslrdrltqvaerqgVVFGRVQXIVVAQFAATLTddtgaPLLLVK 60
ident
Sbjct -----hkeftkfcyevyneikiSDKEFKKRAALDTLRCLKRIS-----PDAELV 46
DSSP -----lhhhhhhhhhhhhllLHHHHHHHHHHHHHHHHHHHLL-----LLEEEE
```

```
DSSP HHhhhhhh1111LLL---1LLEEEEL---LLHHhHHHHHHHHHHH11leEEEEELL
Query GGsslelrrgipDSRT---sKDFATVAR---RDIEIIEQLADAGETGwegfTAIFTAP 113
ident
Sbjct AF-----gsleSGLA1knsdMDLVCLVMDsrVQSDT-IALQFYEELIAE---GFEGAF 95
DSSP EL-----1hhHLL11111EEEEEL1hHHHH-HHHHHHHHHHHLL-----LLEEEE
```

```
DSSP EE11111111LEEEEEEEee1leEEEEEEEEEL11111leeeelhhhh11111
Query EEiaapgpxpKPRRTAKlsyrgrAFATVPIEVSSVEagnadqfdtltsdalglvgvpaa 173
ident
Sbjct QA-----aRIPIIKLT-----ASFQCDIGFNRL----- 119
DSSP EE-----1LLEEEEL-----LLEEEEEEL-----
```

```
DSSP eeeee1hhhhhhhhhhll111111111LLLhhhhhhhhhhllhhhhhhhhhhhh
Query vavpcxtipwqiaqklhavtavleepkaNDRAhd1vdlqlleg11dadlxptrsaciai 233
ident
Sbjct -----aihnt11LSSY----- 130
DSSP -----hhhhhhHHH-----
```

```
DSSP hhh1111111111111111HHHHHHHHHLLL-----11111LHHH
Query fearaqhpwprvat1phWPLIyAGALEGLD-----hlelarTVDA 274
ident
Sbjct -----tkLDAR-LKPMVLLVkhwakrkqinspyfgt1ssygyvlmVLYY 173
DSSP -----hhHLLL-HHHHHHHHhhhhll1111h1111hhhhhhHHH
```

```
DSSP HHHH-----
Query AAQA----- 278
ident
Sbjct LIHVikppvfpnl111s1pkqekivdgdvfgddkledippsqnysslgs1lhgfafay 233
DSSP HHL1111111111111111lee1lee11111h1111111hhhhhhhhhhhh
```

```
DSSP -----hHHHHHHHHHLL-----
Query -----vqRFVARIDRATK----- 291
ident
Sbjct afeprekvtfrppDGYLTKQEKGWtryilaiedpfeishvgrtvssglyrirgefma 293
DSSP 11111111111111111111111111111111111111111111111111hhhhhhhhhh
```

```
DSSP -----1
Query -----r 292
ident
Sbjct asrllnsrsypipyds1feeapip 317
DSSP hhhh1111111111111111
```

No 434: Query=mol1A Sbjct=4ep7A Z-score=5.4

[back to top](#)

```
DSSP 111111111hhhhhhhhhhhhllllHHHHHHHHHHHHHHHHHHLL11111LLEEEE
Query aapyssptnlrslrdrltqvaerqgVVFGRVQXIVVAQFAATLTddtgaPLLLVK 60
```

```

DSSP -----1111hhhhhhhhhhhh11LHHHHHHHHHHHHHHHHHHLL-----LLEEE
DSSP HHHhhhhhh111LLL-----LLEEEEEE11hhHHHHHHHHHHHL11leEEEELLEe1
Query GGslelrrgipDSRT----sKDFATVArddieLIHEQLADAGETGwegfTAIFTAPEei 116
ident
Sbjct AF-----gsleSGLA1knsdMDLCVLM-----TIALQFYEEELIAE----GFEGKFLQ-- 92
DSSP EE-----1hhhHLLL1111EEEEEEEL-----LLHHHHHHHHHHHL-----LEEEELL--

DSSP 111111LLEEEEEEEEL--IEEEEEEEEEEe11111111leeeelhhhh11111le
Query aapgxpvKPRRF TAKLSYR--gRAFATVPIEVSSveagnadqfdtlttsdalglvgvpaav 174
ident
Sbjct ----raRIPIIKLTSDTKngfGASFQCDIGFN----- 120
DSSP -----11LLLLEEEEEELL111LLLLEEEEL-----

DSSP eeeellhhhhhhhhhhhh11111111LLLhhhhhhhhhhhh11hhhhhhhhhhhhhh
Query avpcxtipwqiaqlhavtavleepkaNDRAhdldvlqlllegllldadlxptrsaciaif 234
ident
Sbjct -----nrlaihntLLSS----- 133
DSSP -----1hhhhhhhhHHHH-----

DSSP hhh111111111111LHHhhHHHH-HLLLLL-----11LLLhhH
Query earaqhpwpprvatlpHWPLiYAGA-LEGLDH-----leLARTvdA 274
ident
Sbjct -----ytKLDA-RLKpMVLVKHwakrkqinspyfgt1ssygyvLMVL-yY 177
DSSP -----hhHLL-LHHhhHHHHHHhhhh11111hh1111hhhhHHHH-hH

DSSP HHH-----
Query AAQ----- 277
ident
Sbjct LIHvikppvfpn1111sp1kqekivdgdvdfddkledippsqnysslgsllhgffrfyay 237
DSSP HHH11111111111111111111leel11111hh11111111hhhhhhhhhhhhhh

DSSP -----hhHHHH-----hhhhHLLL-----
Query -----avQRFV-----aridrATKR----- 292
ident
Sbjct kfeprekvvfFRRPdgy1tkqeKGWTSryilaiedpfeishnvgrtvsssglyrirgef 297
DSSP 111111le1LLL11111111LLL111le11111111111111hhhhhhhhhhhh

DSSP -----
Query ----- 292
ident
Sbjct aasrllnsrsypipyds1feea 319
DSSP hhhhh1111111111hhhh111

```

No 435: Query=mol1A Sbjct=2gwsA Z-score=5.4

[back to top](#)

```

DSSP -----
Query ----- 0
ident
Sbjct atnhnlhiteklevlakaysvqgdkwralgyakainalksfhkpvtsyqeacsipgigkr 60
DSSP 11111hhhhhhhhhhhhhhhh111hhhhhhhhhhhhhh111111hhhhhh1111hh

DSSP -----1111111111hhhh
Query -----aapysppntlrs1 14
ident
Sbjct maekiieilesghlrkldhisesvpvlelfsniwgagtktaqmwyqqgfrslelirsqas 120
DSSP hhhhhhhhhhh111hhhh1111hhhhhhhh111111hhhhhhhh1111hhhhhh11

DSSP hhhhhhhhh1111hHHHHHHHHHHHHHHHHLL-LLLLLLLEEEHHHHHHhh1111
Query rdr1tqvaerqgvfGRLQRHVAXIVVAQFAATL-TDDTGAPLLLKGGSSLELrrgipd 73
ident
Sbjct 1ttqqaig1khysdfLERMPREEATEIEQTVQKAaQAFNSGLLCVACGSYRRGK----- 174
DSSP 11hhhhhhhh1hhhhHLLLEHHHHHHHHHHHHHHHHLLLLLLLEEEELHHHHLLL-----

```



```

DSSP  hhhhhHHHHHHhhhhhh1111LLLLL11111hhhhhhhhhh1111111111hhhhhhhhhh
Query  dlxptRSACIaifearaqhpWPPRVatlphwplyagalegldhlelartvdaaaqavqr 281
ident
Sbjct  grvlpTPTEK-----dvfRLLGL----- 316
DSSP  11111LLLHH-----hhhHHLL-----

```

```

DSSP  hhhhhh1111
Query  fvaridratkr 292
ident
Sbjct  -pyrepaerdw 326
DSSP  -1111hhh111

```

No 437: Query=mollA Sbjct=lrztI Z-score=5.4

[back to top](#)

```

DSSP  -----
Query  ----- 0
ident
Sbjct  tnhlhiteklevlakaysvgdkwralgyakainalksfhkpvtsyqeacsipigikrm 60
DSSP  1111hhhhhhhhhhhhhhhh1111hhhhhhhhhhhhhh11111111hhhhhh1111hhh

```

```

DSSP  -----111111111hhhhh
Query  -----aapyspntlrslr 15
ident
Sbjct  aekieilesghlrkldhisesvpvlelfsniwgagtktaqmwyqqgfrsleldirsqasl 120
DSSP  hhhhhhhhh11111hhh11111hhhhhhhh11111hhhhhhhhhh11111hhhhhhhh111

```

```

DSSP  hhhhhhhhh1111hHHHHHHHHHHHHHHHLL-LLLLLLLEEEHHHHHHHHhh1111
Query  drltqvaerqgvvfgrLQRHVAXIVVAQFAATL-TDDTGAPLLLKVGSSLELrrgipds 74
ident
Sbjct  ttqqaiglkhysdf1ERMPREEATEIEQTVQKAaQAFNSGLLCVACGSYRRGK----- 173
DSSP  1hhhhhhhh1hhhhhhLLEEHHHHHHHHHHHHHHHLLLLLLLEEEELHHHHLLL-----

```

```

DSSP  1LLLLEEEEEL-----1LHHHHHHHHHHHHhh1111eeeEELL-EELLLL1LLL
Query  rTSKDFATVAR-----rDIELIHEQLADAGetgwegftaIFTAP-EEIAAPGxPVKP 125
ident
Sbjct  aTCGDVDVLIThpdgrshrgIFSRLDLSLRQEG-----FLTDDIVSQEENG-QQK 223
DSSP  1EELLEEELLLL111111111HHHHHHHHHLLL-----LEEEeEEEEEL-LEE

```

```

DSSP  EEEEEEEEEE1EEEEEEEEEEEL-LLLL1111eeee1hhhh11111eeee1hHHH
Query  RRFtAKLSYrgRAFATVPIEVSSV-EAGNadqfdtltsdalglvgvpaavavpcxtiPWQ 184
ident
Sbjct  YLGVCRLLPG--PGRRHRLDIIVpYSEF-----aCAL 254
DSSP  EEEEELLL--LLLLLEEEEEEEL1HHHH-----hHHH

```

```

DSSP  Hhhhhhhhh11111111111HHHHHHH-----hhhh11hh
Query  Iaqlh'avtavleepkandraHDLVDLQ-----lleg11lda 221
ident
Sbjct  L-----yftgSAHFNRSmralaktkgmslsehalstavvrnthgckvqp 298
DSSP  H-----hhh1LHHHHHHHHhhhhhh1lee111lee1lee1111lee1

```

```

DSSP  hhhhhHHHHHHhhhhhh1111LLLLL11111hhhhhhhhhh1111111111hhhhhhhhhh
Query  dlxptRSACIaifearaqhpWPPRVatlphwplyagalegldhlelartvdaaaqavqr 281
ident
Sbjct  grvlpTPTEK-----dvfRLLGL----- 316
DSSP  1lee1LLLHH-----hhhHHLL-----

```

```

DSSP  hhhhhh1111
Query  fvaridratkr 292
ident
Sbjct  -pyrepaerdw 326
DSSP  -1111hhh111

```



```
-----lrslrdrltqvae 23
Query
ident
Sbjct seikdrilsyfskqtqytynigklftiieqlsvlvttytdilgvltinvtsmeelardmln 120
DSSP hhhhhhhhhhhllhhllllllhhhhhhhhhhhhhhhhhhhhhhhhhhllllllhhhhhhhhhhhh

DSSP hllllhhhhHHHHHHHHHHHHLL111111LLEEEEEHHHHHHHHLL111111LLEEEEE
Query rqgvvfgrlqRHVAXIVVAQFAATLddtgaPLLVKGGSSLELRRGipDSRTsKDFATV 83
ident | | | | |
Sbjct smnvavvsslVKNVKNLMEEYLRRH-----nKSCICYGSYSLYLINP--NIRY-GDIDIL 172
DSSP hh1111111hHHHHHHHHHHHHHL-----LLEEEEEHHHHHHLL--LLL-LLEEEE

DSSP ELLHHHHHHHHHHHHHL111eeeEELL1EELL111111LLEEEEEEEeellleeEEEE
Query ARRdIELIHEQLADAGETGwegftaIFTApEEIAApGxpVPPRRFTAKlsyrgrafATVP 143
ident | | |
Sbjct QTN-SRTFLIDLAFLIKFI--tgnnIILS-KIPYL-----RNYMVIKD-----endNHII 218
DSSP ELL-HHHHHHHHHHHHHH--1111LEEE-ELLL-----LLEEEEL-----111LLE

DSSP EEEEL---LLL111LLEEEElhhhh11111eEEEELLHHHHHHHHHHHHLL1111
Query IEVSSV---EAGNadQFDTLTsdalglvgvpaavAVPCXTIPWQIAQKLHAVTAVLeepk 200
ident |
Sbjct DSNIRqdtMNVV--PKIFID-----NIIYVDPTFQLLNMIKMFSDID---r 260
DSSP EEEELhHHHHHL--LEEEL-----LLEELHHHHHHHHHHLLHH--h

DSSP LLL---LHHHHHHHHHHHL--LHH-----
Query ANDR---AHDLVDLQLEGLL--LDAD----- 222
ident |
Sbjct LEDLskdpEKFNARMATMLEYVryTHGIvfdgkrnmpmkciidenrivvttkdyfsf 320
DSSP HLL1111LHHHHHHHHHHHHhHLL111111111111111111111111111111leehhh111

DSSP -----hhhhhhhhhhHLLL-----l
Query -----lxptrsaciaifeaRAQHP-----w 242
ident
Sbjct kklvyldevnlssdidlnadtscdfesvtnsvylihdnimityFSNTI11sdkgkvhe 380
DSSP leeeel1hhhhhhhhhhllllleelhhhhlleel1hhleeeL111leeeleeh

DSSP LLL11111hhhhhhhhll1111111111hhhhhhhhHHHH-----hLLL---
Query PPRVatlphwplyagaleglhdhleartvdaaaqavrFVARI-----DRATK--- 291
ident
Sbjct ISAR-----gICAHILlyqmltsgeYKQC1sd 407
DSSP HHH-----hhHHHHhhhhll11LHHHHhh

DSSP -----l
Query -----r 292
ident
Sbjct llnsmnrdrkipiyshterdkkprghfiniekdiivf 445
DSSP hhh111111111111111111111111111111leeeel111leel
```

No 440: Query=mol1A Sbjct=4xq8A Z-score=5.4

[back to top](#)

```
-----111111111hhhhhhhhhhlllllHHHHHHHH
Query -----aapyspntlrslrdrltqv aerqgvfGRLQRHVA 37
ident
Sbjct vpvlelfnisniwagtktaqmwyyqgfrsleldirsqaslttqqaiglkhysdfLERMPREE 60
DSSP lhhhhhhhhllllllhhhhhhhhllllllhhhhhhhhllllhhhhhhhhhhhhllleEEHHH

DSSP HHHHHHHHHLL-LLLLLLLEEEEEHHHHHHhh111111LLEEEEEEL-----1LH
Query XIVVAQFAATL-TDDTGAPLLLVKGGSSLELrrgipdsrTSKDFATVAR-----rDI 88
ident | | |
Sbjct ATEIEQTVQKAaQAFNSGLLCVACGSYRRGK-----aTCGDVDVLITHpdgrshrgIF 113
DSSP HHHHHHHHHHHHLLLLLLLEEEELLLLLL-----1EELEEEEEEE1111111LH

DSSP HHHHHHHHHHHhh11111eeeEELL-EELL1LLLLLLLEEEEEEEEEE11EEEEEEEEEE
Query ELIHEQLADAGetwegftaIFTAP-EEIAApGXPKPRRFTAKLSYrgRAFATVPIEVS 147
ident | | | |
```

```
DSSP EL-LLLL1111eEEEelhhhh11111eEEEelhHHHHhhhhhhhh1111111111H
Query SV-EAGNadqfdtltsdalglvgvpaavavpcxtiPWQIaqlhAvtavleepkandraH 206
ident |
Sbjct VVpYSEF-----aCALL-----yftgS 178
DSSP EL1HHHH-----hHHHH-----hhhL
```

```
DSSP HHHHH-----hHHh11hHHHHhHHHHhHHHH1111
Query DLVDLQ-----lleg111dADLXptRSACIaifearaqh 241
ident |
Sbjct AHFNRSmralaktkgmslsehalstavvrnthgckvgpgRVLP--TPTEK-----dvf 229
DSSP HHHHHhhhhhh111eEl111eEl111eEl111eEl1111eEl1LLL--LLLHH-----hhh
```

```
DSSP LLLLL1111hhhhhhhh111111111hhhhhhhhhhhhhh1111
Query WPPRVat1phwpliYagaleglDhlelartvdaaaqavqrfvaridrAtkr 292
ident |
Sbjct RLLGL-----pyrepaerdw 244
DSSP HHHLL-----1111hh111
```

No 441: Query=mol1A Sbjct=5cj7B Z-score=5.4

[back to top](#)

```
DSSP -----11111111hhhhhhhhhhhh1111hHHHHHHH
Query -----aapyspntlrslrdrltQvaerqgvfGRLQRHVAX 38
ident |
Sbjct pvlEIfsnIwagtktaqmwyqgfrsleDirsqaslttqQaIglkhysdfLERMPREEA 60
DSSP 1hhhhhh11111hhhhhh111111hhhhhh1111hhhhhhhh111hHLEEHHH
```

```
DSSP HHHHHHHLL-LLLLLLEEEEHHHHHHhh11111LLLLEEEEL-----1LHH
Query IVVAQFAATL-TDDTGAPLLLVKGGSSLELrrgIpdSrTSKDFATVAR-----rDIE 89
ident | | | | |
Sbjct TEIEQTVQKAaQAFNSGLLCVACGSYRRGK-----aTCGDVDVAIThpdgrshrgIFS 113
DSSP HHHHHHHHHHhHHLLLEEEELHHHLL-----1EELLEEEEEE1111111LHH
```

```
DSSP HHHHHHHHHhh1111eEEELLE-ELL111LLLLEEEEEEE11EEEEEEEEEE
Query LIHEQLADAGetgwegftAIFTAPE-EIAApGXPVKPRRFTAklSYrgRAFATVPIEVSS 148
ident | | | | |
Sbjct RLLDSLrQEG-----FLTDDLvsQEEN--GQQKYLGVcRLPG--PGRrHRRLDIIV 161
DSSP HHHHHHHHHL-----LEEEEEeEEEE--LEEEEEEELLL--LLLLLEEEEEE
```

```
DSSP L-LLLL1111eEEEelhhhh11111eEEEelhHHHHhhhhhh1111111111HH
Query V-EAGNadqfdtltsdalglvgvpaavavpcxtiPWQIaqlhAvtavleepkandraHD 207
ident |
Sbjct VpYSEF-----aCALL-----yftgSA 178
DSSP L1HHHH-----hHHHH-----hhhLH
```

```
DSSP HHHHH-----hHHh11hHHHHhHHHHhHHHH1111
Query LVDLQ-----lleg111dADLXptRSACIaifearaqhW 242
ident |
Sbjct HFNRSmralaktkgmslsehalstavvrnthgckvgpgRVLP--TPTEK-----dvfR 229
DSSP HHHHHhhhhhh111eEl111eEl111eEl111eEl1111eEl1LEEL--LLLHH-----hhh
```

```
DSSP LLLLL1111hhhhhhhh111111111hhhhhhhhhhhhhh1111
Query PPRVat1phwpliYagaleglDhlelartvdaaaqavqrfvaridrAtkr 292
ident |
Sbjct LLGL-----pyrepaerdw 243
DSSP HHL-----1111hh111
```

No 442: Query=mol1A Sbjct=5chgB Z-score=5.4

[back to top](#)

```
DSSP -----11111111hhhhhhhhhhhh1111hHHHHHHH
```

Sbjct pvlelfsnwgagtktaqmwyqqgfrsledirsqaslttqqaiglkhysdfLERMPREEA 60  
DSSP lhhhhhh111111hhhhhh111111hhhhhh1111hhhhhh111hhHLEEHHHHH  
  
DSSP HHHHHHHHLL-LLLLLLLEEEHHHHHHhh11111LLLEEEEL-----1LHH  
Query IVVAQFAATL-TDDTGAPLLLVKGGSSLELrrgipdsrTSKDFATVAR-----rDIE 89  
ident | | | | | | | | | |  
Sbjct TEIEQTVQKaaQAFNSGLLCVACGSYRRGK-----aTCGDVDVAIThpdgrshrgIFS 113  
DSSP HHHHHHHHHhhHHLLEEEELLLLLL-----1EELLEEEEE1111111LHH  
  
DSSP HHHHHHHHHhh1111leeEEELLE-ELLL111LLLEEEEEEEEE1EEEEEEEEEE  
Query LIHEQLADAGetgwegftAIFTAPE-EIAApgXPVKPRRFTAKLSYrgRAFATVPIEVSS 148  
ident | | | | | | | | | |  
Sbjct RLLDSLRQEG-----FLTDDLvsQEEN--GQQQKYLGVCRPLG--PGRRRRLDIIV 161  
DSSP HHHHHHHLL-----LEEEEEE1LEE--LLEEEEEELLLEL--LLLLLEEEEEEE  
  
DSSP L-LLLL1111leeeelhhhh11111leeeel1hHHHHhhhhhhh1111111111HH  
Query V-EAGNadqfdt1tsdalglvgvpaavpcxtiPWQIaqklhavtavleepkandraHD 207  
ident | | | | | | | | | |  
Sbjct VpYSEF-----aCALL-----yftgSA 178  
DSSP L1HHHH-----hHHHH-----hhlhLH  
  
DSSP HHHHH-----hhhh11hHHHHhhHHHHhhhhhh1111L  
Query LVDLQ-----1leg111daDLXptrSACIaifearaqhpW 242  
ident | | | | | | | | | |  
Sbjct HFNRSmralaktkmslsehalstavrnrthgckvgpgrVLPT--PTEK-----dvrR 229  
DSSP HHHHHhhhhhh1lee111leee1ee1111eeel1EEL--LLHH-----hhhH  
  
DSSP LLL11111hhhhhhhh1111111111hhhhhhhhhhhhhhhh1111  
Query PPRVatlphwpliyagalegldhlelartvdaaaqavqrfvaridratri 292  
ident | | | | | | | | | |  
Sbjct LLGL-----pyrepaerdw 243  
DSSP HLL-----111hhhh11

No 443: Query=mol1A Sbjct=4xrhA Z-score=5.4

[back to top](#)

DSSP -----11111111hhhhhhhhhhhh1111hHHHHHHHHH  
Query -----aapyspntlrslrdrltqvaerqgvfGRLQRHVAX 38  
ident | | | | | | | | | |  
Sbjct pvlelfsnwgagtktaqmwyqqgfrsledirsqaslttqqaiglkhysdfLERMPREEA 60  
DSSP lhhhhhh111111hhhhhhhh111111hhhhhh1111hhhhhh111hhHLEEHHHHH  
  
DSSP HHHHHHHHLL-LLLLLLLEEEHHHHHHhh11111LLLEEEEL-----1LHH  
Query IVVAQFAATL-TDDTGAPLLLVKGGSSLELrrgipdsrTSKDFATVAR-----rDIE 89  
ident | | | | | | | | | |  
Sbjct TEIEQTVQKaaQAFNSGLLCVACGSYRRGK-----aTCGDVDVLIThpdgrshrgIFS 113  
DSSP HHHHHHHHHhhHHLLEEEELLLLLL-----1EELLEEEEE1111111LHH  
  
DSSP HHHHHHHHHhh1111leeEEELLE-ELLL111LLLEEEEEEEEE1EEEEEEEEEE  
Query LIHEQLADAGetgwegftAIFTAPE-EIAApgXPVKPRRFTAKLSYrgRAFATVPIEVSS 148  
ident | | | | | | | | | |  
Sbjct RLLDSLRQEG-----FLTDDLvsQEEN--GQQQKYLGVCRPLG--PGRRRRLDIIV 161  
DSSP HHHHHHHLL-----LEEEEEEeEEEE--LLEEEEEELLLEL--LLLLLEEEEEEE  
  
DSSP L-LLLL1111leeeelhhhh11111leeeel1hHHHHhhhhhhh1111111111HH  
Query V-EAGNadqfdt1tsdalglvgvpaavpcxtiPWQIaqklhavtavleepkandraHD 207  
ident | | | | | | | | | |  
Sbjct VpYSEF-----aCALL-----yftgSA 178  
DSSP L1HHHH-----hHHHH-----hhlhLH  
  
DSSP HHHHH-----hhhh11hHHHHhhHHHHhhhhhh1111L  
Query LVDLQ-----1leg111dADLXptrSACIaifearaqhpW 242  
ident | | | | | | | | | |  
Sbjct HFNRSmralaktkmslsehalstavrnrthgckvgpgrVLP--TPTEK-----dvrL 230  
DSSP HHHHHhhhhhh1lee111leee1ee1111eeel1EEL--LLLHH-----hhhH









DSSP EE-ELLLEEL111111LEEEEEEEE-e11EEEEEEEEEEELLL111111eeeeelhh  
 Query AI-FTAPEEIAapgxpvkPRRFTAKLS-yrgRAFATVPIEVSSVEAGnadqfdt1tsdal 165  
 ident | | | | |  
 Sbjct LEdLRMEQRV-----PDALVFTIQtrgtAEPITVTIVPAYRALG----- 152  
 DSSP LEEEEEELLL-----LLEEEEEEE1111LEEEEEEEEEELLL-----

DSSP hh111111eeeee1hhhhhhhhhhhh1111111111hhhhhhhhhhhh11hhhhhh  
 Query glvgvpaavavpcxtipwqiaqklhavtavleepkandrahdldlqlleg111dadlpx 225  
 ident  
 Sbjct -----pslpn 157  
 DSSP -----11111

DSSP HHHHHHHHHHHHL-----l  
 Query TRSACIAIFEARA-----q 239  
 ident  
 Sbjct SQPPPEVYVSLIKacfxpsfse1qrnfvkhrptklksllrlvkhwyqqyvkarspranlp 217  
 DSSP LLLLHHHHHHHHHH111hhhhhhhhhhhh111hhhhhhhhhhhhhhhhhh11111111

DSSP 11111111LLLHHhhhhhhhh1111111111LHHH-----hhhhhHH  
 Query hpwpprvaTLPHWPliyagalegldhlelarTVDA-----aaqavQR 281  
 ident | | | | |  
 Sbjct plyale11TIYAWE-----mgtEEDEnfmldegfttvmdllleyeviciYW 263  
 DSSP 1hhhhhhHHHHHH-----hhhLLLL111hhhhhhhhhhhhhhhhleeL

DSSP HH-----  
 Query FV----- 283  
 ident  
 Sbjct TKyytlhnaiedcvrkqlkkerpiildpadptlnvaegyrwdivaqrasclkqdcyd 323  
 DSSP LL111111hhhhhhhhhh111111ee1111111111111111hhhhhhhhhh111hhhl

DSSP --hhhhh1111  
 Query --aridratkr 292  
 ident  
 Sbjct nrenpisswnv 334  
 DSSP 1111111111

No 449: Query=mol1A Sbjct=5decD Z-score=5.3

[back to top](#)

DSSP 1111111111hhhhhhhhhhhhHLLLLHHHHHHHHHHHHHHHHHHHLL--LLLLL-LE  
 Query aapyspntnlrslrdrltqvaerQGVVFGRLQRHVXIVVAQFAATLT--DDTGAP-LL 57  
 ident |  
 Sbjct -----DDKWERFLVPYRQAVEELKVKLGIRt1YEDDHSPIE 37  
 DSSP -----LHHHHHHHHHHHHHHHHHHHHHHHHHHHHhhHLLLLL1L

DSSP EEEhhHHHHhh111111-----1LLEEEEEEL--LHHHHHHHHHH  
 Query LVKggSSLElrrgIPDSR-----tSKDFATVARR--DIELIHEQLAD 97  
 ident | | | | |  
 Sbjct FVT--GRVK---PVASIIekarrksiplheietmqdIAGLRIMCQFvdDIQIVKEMLFA 91  
 DSSP EEE--EDEL---LHHHHhhhh111111hhhhhh111LEEEEEELhhHHHHHHHHHH

DSSP HHHh1111eEEEELLEELLLLL11LEEEEEEEEL--1EEEEEEEEEEEL1111  
 Query AGetgwegfTAIFTAPEEIAAPGXpvKPRRFTAKLSYR--gRAFATVPIEVSSVEagna 154  
 ident | | | | |  
 Sbjct RK-----DFTVVDQRDYIASGY--RSYHLVVLPLQtvsgEKHVLVEIQIRTLA---- 138  
 DSSP LL-----LLEEEEEELLLLL--LLEEEEEEEe11eEEEEEEEEEEHH----

DSSP 111eeeee1hhhh111111eeeee1hhhhHHHHHHHHH1111111111hhhhhhhh  
 Query dqfdt1tsdalglvgvpaavavpcxtipwqiaQKLHAVTAvleepkandrahdldlql 214  
 ident  
 Sbjct -----mfWATIEHSLN----- 150  
 DSSP -----hhHHHHHHHHHH-----

DSSP hhh11hhhhhhhhhhhhhhhh1111111111hhhhhhhh1111111111hh  
 Query egl1dadlpxtrsaciaifearaqHPWPprvatlphwpliyagalegldhlelarTVDA 274



```

ident
Sbjct kttftevqterleqadrsvlikcpkslnEKKLLqylsshgkidnyffFENRGIH--ALIEF 58
DSSP 11hhhhhhhhhhhhhhleeeee111111HHHHHHhhhhhh1leeeeeEELLLEE--EEEE

DSSP -----
Query ----- 20
ident
Sbjct sekssvaslqavtgipkhvvpkyrsrftftlknpgsqaaerpvkispqshipvnelipk 118
DSSP 111hhhhhhhhhh11111111111leeeee111111111111111111111111hhhhhhh

DSSP -----hhhh11LLHHHHHHHHHHHHHHHHHHHLLL11111LLEEEHHhhhh
Query -----vaerqgVVFGRlQRHVAXIVVAQFAATLTddtgaPLLLVKGGSsle 66
ident
Sbjct lchadsissqmyillneyqlTEENIKLRYLACSLVRDFARAYF----PDSTVKPF--gs 171
DSSP hh1111hhhhhhhhhh11LHHHHHHHHHHHHHHHHHHHLLL-----LLEEEEEE--hh

DSSP hhh11111111LLEEEEL-----1LHHHHHHHHHHHHHLL1EEEEE
Query lrrgipdsrtsKDFATVAR-----rDIELIHEQLADAGETGwEgFTAI 109
ident
Sbjct svntfgklgcdVDMFLDFHkgpfemeyqmkr1pser1ATQKILSIIIGDCLDNFG--PGYS 229
DSSP h1111111111EEEEEEL11leeeee111111hhHHHHHHHHHHHHHHHLL--LLEE

DSSP -ELLLEEL11111111LLEEEEEEEEl1eeEEEEEEEEEe11111111leeeelhhhh1
Query -FTAPEElaapgxpvKPRRF TAKLSYrgaFATVPIEVSSveagnadqfdt1tsdalglv 168
ident
Sbjct sVQKILNA-----RCPLVKFSHQp---tGFQCDSVS----- 258
DSSP eEEEEELL-----LLEEEEEEEL---LEEEEEEEL-----

DSSP 1111leeeel1hhhhhhHHHHHHh11111111LLLhHHHHHHHHhh11hhhhhhhh
Query gvpaavavpcxtipwqiaQKLHAVtavleepkaNDRAhdld1qllegl1dadlxptrs 228
ident
Sbjct -----nsiaIRCSEL-----LYIY----- 272
DSSP -----1hhHHHHHH-----HHHH-----

DSSP hhhhhhhhh111111111111LHHHhHHHHHL-1LLL-----111
Query aciaifearaqhpwprvat1pHWPLiYAGALE-gLDHL-----ela 269
ident
Sbjct -----gcLDPR-VRALVFs1RCWArvhgltnsvpgtwitnfs1tm 311
DSSP -----hhHLHH-HHHHHHHhhHHHHhh111111111111hhhhhh

DSSP 1LHHHHHHH-----
Query rTVDAAAQA----- 278
ident
Sbjct mIMFFLQKRsppii1dqlkeladekdkhviggycsfvsdlskikptkntetldellc 371
DSSP hHHHHHHLL1111111hhhhhh11hh111111111111111111111111hhhhhh

DSSP -----hhhhhhhhHLLL-----
Query -----vqrfvaridRATKR----- 292
ident
Sbjct dffqyfgnfdfrknslnlrkgkevNKPESsplyiwnpfeqdlniskvnpqplekvama 431
DSSP hhhhhhh111111leee111leeeELLLL111111111111111111111111hhhhhhhhhh

DSSP -----
Query ----- 292
ident
Sbjct resawilqkedktqminkepwglaavlipf 462
DSSP hhhhhhh111hhhhhh111111hhhh1111

```

No 452: Query=mol1A Sbjct=5deeV Z-score=5.3

[back to top](#)

```

DSSP 1111111111hhhhhhhhhhhhHLLLHHHHHHHHHHHHHHHHHHHLLL---LLLLL-L
Query aapyspntnlrsldr1rtqvaerQGVVFGRLQRHVAXIVVAQFAATLT---DDTGAP-L 56
ident
Sbjct -----DKQWERFLVPYRQAVEELKVKLKGIRt1yEYEDHSpI 37

```

```

DSSP  EEEhHHHHhhL1LLL-----1LLEEEELL--LHHHHHHHH
Query  LLVKggSSElrrgIPDSR-----tSKDFATVARR--DIELIHEQLA   96
ident  |                               ||   |
Sbjct  EFVT--GRVK---PVASilekarrksiplheietmqdIAGLRIMCQFvdDIQIVKEMLF  91
DSSP  LEEE--EEEL---LHHHHhhhhhh1111hhhh111LEEEEEEELLhhHHHHHHHH

```

```

DSSP  HHHhh1111eEEEEl1ee11111111LLEEEEEEEEL---1EEEEEEEEEEELL11
Query  DAGetgwegfTAIFTapeeiaapgxpvKPRRFtAKLSYR---gRAFATVPIEVSSVEagn  153
ident  |                               ||
Sbjct  ARK-----DFTVV-----RSYHLVLYPLQtvsGKHLVLEIQIRTLA---  129
DSSP  HLL-----LLEEL-----LEEEEEEEL111EEEEEEEEEHH---

```

```

DSSP  1111eeeeelhhhh1111111111eeeee1hhhhHHHHHHHLL1111111111hhhhhh
Query  adqfdtltsdalglvgvpaavavpcxtipwqiAQKLHAVTAveepkandrahdldlql  213
ident  |
Sbjct  -----mFWATIEHSLN-----  141
DSSP  -----hhHHHHHHHH-----

```

```

DSSP  hhh11hhhhhhhhhhhhhhhh11111111LLLLHhhhhhhhh11111111hh
Query  legl1ldadlxptrsaciaifearaqhpwpprVATLPHWplyagalegldhlelartvd  273
ident  |
Sbjct  -----ykysGN1PEKV-----klrlqrse  161
DSSP  -----hh11LLLHHH-----hhhhhhhh

```

```

DSSP  hhhhhhhhhhhhh1111
Query  aaaqavqrfrvaridratkr  292
ident  |
Sbjct  aasrldeemseirgevqea  180
DSSP  hhhhhhhhhhhhh111

```

No 453: Query=mol1A Sbjct=5f2vQ Z-score=5.3

[back to top](#)

```

DSSP  1111111111hhhhhhhhhhhhhhhhL1111111111LLEEEEEEEL--LLL--LLL
Query  aapyspntnrlsrldr1tqvaerQGVVFGRLQRHVXIVVAQFAATL--TDDT--GAPL   56
ident  |
Sbjct  -----KQWERFLVPYRQAVEELKVKLGIrtLYEYedDHSP  36
DSSP  -----LHHHHLHHHHHHHHHHHHHHhhHLL11LLL

```

```

DSSP  -EEhHHHHhhL1LLL-----1LLEEEELL--LHHHHHHHH
Query  -LLVKggSSElrrgIPDSR-----tSKDFATVARR--DIELIHEQL   95
ident  |                               ||   |
Sbjct  iEFVT--GRVK---PVASilekarrksiplheietmqdIAGLRIMCQFvdDIQIVKEMLF  90
DSSP  1LEE--EEEL---LHHHHhhhhhh111111hh111LEEEEEEELLhhHHHHHHHH

```

```

DSSP  HHHhh1111eEEEE11ee11111111LLEEEEEEEEL---1EEEEEEEEEEELL11
Query  ADAGetgwegfTAIFTapeeiaapgxpvKPRRFtAKLSYR---gRAFATVPIEVSSVEagn  152
ident  |                               ||
Sbjct  FARK-----DFTV-----RSYHLVLYPLQtvsGKHLVLEIQIRTLA--  128
DSSP  HLL-----LLL-----LEEEEEEEL111EEEEEEEEEHH---

```

```

DSSP  1111eeeeelhhhh1111111111eeeee1hhhhHHHHHHHLL1111111111hhhhhh
Query  nadqfdtltsdalglvgvpaavavpcxtipwqiAQKLHAVTAveepkandrahdldlql  212
ident  |
Sbjct  -----mFWATIEHSLN-----  140
DSSP  -----hhHHHHHHHH-----

```

```

DSSP  hhh11hhhhhhhhhhhhhhhh11111111LLLLHhhhhhhhh11111111hh
Query  l1eg1ldadlxptrsaciaifearaqhpwpprVATLPHWplyagalegldhlelartv  272
ident  |
Sbjct  -----ykysGN1PEKV-----klrlqras  159
DSSP  -----hh11LLLHHH-----hhhhhhhh

```

```

DSSP  hhhhhhhhhhhhh1111

```





```
Query -----aapysspptnlr 12
ident
Sbjct aekideflatgklrklekirqddtssinflttrvsgigpasaarkfvdegiktledlrkne 120
DSSP hhhhhhhhhhl1lhhhhhhhl1lhhhhhhhh1l1l1l1l1lhhhhhhhh1l1l1lhhhhhl1h

DSSP hhhhhhhhhhh1l1lhhhhHLLLLLLLLLEEEHHHHHHhh1
Query slrdrltqvaerqgvfgrlqRHVAXIVVAQFAA-TLDDTGAPLLLKVGSSLElrgi 71
ident
Sbjct dklnhhqriglkyfgdfekriPREEMLMQDIVLnEVKKVDSEYIATVCGSFRRG----- 175
DSSP hhl1lhhhhhhhl1lhhhh1leEHHHHHHHHHHHHHLLLLLEEEELLLLL-----

DSSP 1LLLLLLEEEEL-----1LHHHHHHHHHHHhh1l1leEEELLLEE1111
Query pdSRTSKDFATVAR-----rDIELIHEQLADAGetgwegftAIFTAPEEiaap 119
ident
Sbjct --AESSGDMDVLLThpsftsestkqpkLLHQVVEQLKQVH-----FITDTLSK---- 221
DSSP --LLEELLEEEL11leel1e1l1l1HHHHHHHHHHHLL-----LEEEEEE----

DSSP 111LLEEEEEEEEL-LEEEEEEEEEEEEL-LLLL111leeeelhhhh1111leeee
Query gxpVKPRRFTAKLSYR-GRAFATVPIEVSSV-EAGNadqfdlttsdalglvgvpaavavp 177
ident
Sbjct --gETKFMGVCQLPSKnEKEYPHRRIDIRLIpKDQY----- 255
DSSP --1LEEEEEELLLLLL1LLEEEEEEEL1HHHH-----

DSSP ellhHHHH--hhHHHH-HLLL1111111lhhhhhhhhhh1lhhHHHHhhHHHHh
Query cxtiPQWl---aqKLHAV-TAVLeepkandrahdldlqll1eg1lldaDLPXtrSACIai 233
ident
Sbjct ---yCGVlyftgsDIFAKnMRAH-alekgftineytirplgvgtvagePLPV--DSEK-- 307
DSSP ---hHHHHhh1lHHHHHHHHH-hh1leel1leel1111111LLL--LHH--

DSSP hhhh111LLL11111lhhhhhhhh1111111lhhhhhhhhhhhh1111
Query fearaqHPWPRvatlphwpliyagaleglhdhlelartvdaaavqrfvaridratkr 292
ident
Sbjct ---dofdYIQWK-----yrepkdrse 325
DSSP ---hhhHLLL-----1lhh111
```

No 456: Query=mol1A Sbjct=2ga9D Z-score=5.3

[back to top](#)

```
DSSP -----11111LLL--
Query -----aapysspPTN-- 10
ident
Sbjct nitlkiietylgrvpsvneyhmksqarniqkitvfnkdifvslvknkkrffsDVNTsa 60
DSSP lhhhhhhhhhl1l1lhhhhhhhhhhhhhhhhhh1lhhhhhhhhhhhhhh1l1l1l1h

DSSP -----hhhhhhhhhh
Query -----lrslrdrltqvae 23
ident
Sbjct seikdrilsyfskqtqtynigklftielqsvlvttytdilgvltinvtsmelardmln 120
DSSP hhhhhhhhh1lhhhl1l1lhhhhhhhhhhhhhhhhhh1lhhhl1lhh1lhhhhhhhh

DSSP h111lhhhhHHHHHHHHHHHLL11111LEEEHHHHHHHHH11LLL1LEEEE
Query rqgvvfglqRHVAXIVVAQFAATLddtgaPLLLVKGSSLELRRGipDSRTsKDFATV 83
ident
Sbjct smnvavvsslVKNVNLMEELVRRH-----nKSCICYGSYSYLYLNP--NIRY-GDIDIL 172
DSSP hh11111l1HHHHHHHHHHHHHLL-----1LLEEEELHHHHHLLL--LLL-LEEEE

DSSP ELLHHHHHHHHHHHHH11leeeEELLLEELL11111LEEEEEEeellleeEEEE
Query ARRrDIELIHEQLADAGETgwegftAIFTApEEIaApxpvpKPRRFTAKlsyrgrafatVP 143
ident
Sbjct QTN-SRTFLIDLAFLIKFI--tgnnIILS-KIPYL-----RNYMVIKD-----endNHII 218
DSSP ELL-HHHHHHHHHHHHHH--h111LEEE-ELLL-----LLEEEEL-----11LEEE

DSSP EEEEE---LLLL11LEEEELhhhh11111leEEEELLHHHHHHHHHHHLL1111
Query IEVSS---VEAGNadQFDTLTsdalglvgvpaavAVPCXTIPWQIAQLHAVTAVLeepk 200
ident
```





Query l1eg11ldadlxptrsaciaifearaqhpwpprVATLPHWpliyagaleglhdhlelartv 272  
ident  
Sbjct -----ysGNIPEKV-----klrlqras 162  
DSSP -----11LLLLHHH-----hhhhhhh

DSSP hhhhhhhhhhhhhhh1111  
Query daaaqavqrfvaridratkr 292  
ident  
Sbjct eaasrldeemseirgevqea 182  
DSSP hhhhhhhhhhhhhhh111

No 460: Query=mol1A Sbjct=5deep Z-score=5.3

[back to top](#)

DSSP 111111111hhhhhhhhhhHLLLLHHHHHHHHHHHHHHHHHLL--LLLL--LLLL 56  
Query aapyssptnlrslrdrltqvaerQGVVFGRLQRHVAXIVVAQFAATL--TDDT--GAPL  
ident |  
Sbjct -----DKQWERFLVPYRQAVEELKVKLGIRtLYEYeDHSP 37  
DSSP -----LLLHHHHLHHHHHHHHHHHHHHHHHHhhHLL11LLLL

DSSP -EEEEhHHHHhh1LLLLL-----1LLEEEEEELL--LHHHHHHHH 95  
Query -LLVKggSSLElrrgIPDSR-----tSKDFATVARR--DIELIHEQL  
ident | | | | |  
Sbjct iEFVT--GRVK---PVASIIekarrksiplheietmqdIAGLRIMCQFvdDIQIVKEML 91  
DSSP 1LEEE--EEL---LHHHHhhhhhh1111hhhhhh111LEEEEEELLhhHHHHHHHH

DSSP HHHHh1111eEEEELLle11111111LEEEEEEEEL---1EEEEEEEEEEELL11 152  
Query ADAGetgwegfTAIFTAPeeiaapgxpvKPRRFTAKLSYR---gRAFATVPIEVSSVEag  
ident | |  
Sbjct FARK-----DFTVVDQ-----RSYHLVVLYPLQtvsGKHLVVEIQIRTLA-- 132  
DSSP HLLL-----LLEELL-----LEEEEEEEEEElleEEEEEEEEEEHH--

DSSP 1111leeeelhhhh11111leeeelhhhhHHHHHHHLL11111111hhhhhh 212  
Query nadqfdt1tsdalglvgvpaavavpcxtipwqiAQKLHAVTAVLeepkandrahdldvlq  
ident  
Sbjct -----mnfWATIEHSLNYK----- 146  
DSSP -----hhHHHHHHHHHH-----

DSSP hhhhh11hhhhhhhhhhhh11111111LLLLLHhhhhhhhh111111111h 272  
Query l1eg11ldadlxptrsaciaifearaqhpwpprVATLPHWpliyagaleglhdhlelartv  
ident  
Sbjct -----ysGNIPEKV-----klrlqras 163  
DSSP -----11LLLLHHH-----hhhhhhh

DSSP hhhhhhhhhhhhhhh1111  
Query daaaqavqrfvaridratkr 292  
ident  
Sbjct eaasrldeemseirgevqea 183  
DSSP hhhhhhhhhhhhhhh111

No 461: Query=mol1A Sbjct=5f2vV Z-score=5.3

[back to top](#)

DSSP 111111111hhhhhhhhhhHLLLLHHHHHHHHHHHHHHHHHLL--LLLL--LLLL- 56  
Query aapyssptnlrslrdrltqvaerQGVVFGRLQRHVAXIVVAQFAATL--TDDT--GAPL-  
ident |  
Sbjct -----DKQWERFLVPYRQAVEELKVKLGIRtLYEYeDHSPi 37  
DSSP -----LHHHHHHHHHHHHHHHHHHHHhhHLL11LLLL1

DSSP EEEEhHHHHhh1LLLLL-----1LLEEEEEELL--LHHHHHHHH 96  
Query LLVKggSSLElrrgIPDSR-----tSKDFATVARR--DIELIHEQLA  
ident | | | | |  
Sbjct EFVT--GRVK---PVASIIekarrksiplheietmqdIAGLRIMCQFvdDIQIVKEMLF 91

```
DSSP HHHhh1111eEEEEl1le11111111LLEEEEEEEEEEL---1EEEEEEEEEEEEELL111
Query DAGetgwegfTAIFTapeeiaapgxpvKPRRFTAKLSYR---gRAFATVPIEVSSVEagn 153
ident
Sbjct ARK-----DFTVV-----RSYHLVLYPLQtvsgEKHVLVEIQIRTLA--- 129
DSSP HLL-----LLEEL-----LEEEEEEEEEEEe11eEEEEEEEEEEHH---
```

```
DSSP 1111eEEEElhhhh11111111eEEEElhhhhhHHHHHHHHHL1111111111hhhhhhhh
Query adqfdt1tsdalglvgpaavavpctipwqiAQLHAVTAveepkandrahdldlql 213
ident
Sbjct -----mfWATIEHSLN----- 141
DSSP -----hhhHHHHHHHHH-----
```

```
DSSP hhhh11hhhhhhhhhhhhhhhh111111LLELLLHhhhhhhhh1111111111hh
Query legllldadlxptrsaciaifearaqhpwppRVATLPHWpliYagalegldhlelartvd 273
ident
Sbjct -----ykySGNIPEKV-----klrlqraser 161
DSSP -----hh1LLELLHHH-----hhhhhhhhh
```

```
DSSP hhhhhhhhhhhhhhh1111
Query aaaqavqrfvaridratkr 292
ident
Sbjct aasrldeemseirgevqea 180
DSSP hhhhhhhhhhhhhhh1111
```

No 462: Query=mol1A Sbjct=4yd1A Z-score=5.3

[back to top](#)

```
DSSP -----
Query ----- 0
ident
Sbjct mPAYACQRPTLthhntglsealeilaeagfegsegrlltfcraasvlkalpsvttls 60
DSSP 1111hh1111111111hhhhhhhhhhhhhh11hhhhhhhhhhhhhh11111111hh
```

```
DSSP -----
Query ----- 0
ident
Sbjct qlqglphfgehssrvvqellehgvcceeverrrseryqtmklftqifgvgtadryre 120
DSSP hh11111111hhhhhhhhhhhh1111hhhhhhhh11hhhhhhhh111111hhhhhhhh1
```

```
DSSP 1111111111hhhhhhhhhhhh1111hhhhhHHHHHHHHHHHHHL-LLLL1LLELEE
Query aapyspntnlrslrdrltqvaerqgvfgrlqRHVAXIVVAQFAAT-LTDDtGAPLLLV 59
ident
Sbjct glrtlddlreqpqltqqkag1qhhd1stpvLRSDVDALQVVVEEaVGQA1PGATVTL 180
DSSP 1111hhhh11hh11hhhhhhhh11hh111eEHHHHHHHHHHHHHHHH1LLEEEEE
```

```
DSSP EHHHHHHHHhh111111LLEEEEEEL-----1LHHHHHHHHHHHHhh1111eeeEEL
Query KGSSELELrrgipdsrTSKDFATVAR-----rDIELIHEQLADAGetgwegftaIFT 111
ident
Sbjct TGGFRRGK-----1QGHVDVFLIThpkegqagLLPRVMCRLQDQG-----LIL 224
DSSP LHHHLLL-----1EELEEEEEEE11111111LHHHHHHHHHLLL-----LEE
```

```
DSSP LLEELL-1111LLEEEEEEEEEELLEeEEEEEEEEEL-LLLL1111eEEEElhhhh11
Query APEEIA-APGXPKPRRFTAKLSYRGRaFATVPIEVSSV-EAGNadqfdt1tsdalglvg 169
ident
Sbjct YHQHQHschmdAFERSFCIFRLPQPGS-WKAVRVDLVVApVSQF----- 267
DSSP EEEEE11111LLEEEEEEEEEELLE-EEEEEEEEEEL1HHHH-----
```

```
DSSP 1111eEEEElhhHHHHhhhhhh1111111111HHHHHHH-----hhh
Query vpaavavpctipWQIaqlhAVTAVleepkandraHDLDLQ-----11e 215
ident
Sbjct -----pFALL-----gwtgSKLFQRElrrfsrkekg1wlnshg 300
DSSP -----hHHHH-----hh1LHHHHHHhhhhhhhh11eelle
```

```
DSSP hh11hhhhhhHHHHHHhhhh1111LLELL1111hhhhhhhh1111111111hhhh
```

Sbjct lfdpeqkttffqAASEE-----difRHLGL----- 324  
DSSP eeel111ee111LLHH-----hhhHLLL-----

DSSP hhhhhhhhhhhhh1111  
Query aqavqrfvaridratkr 292  
ident  
Sbjct -----ylppeqrna 333  
DSSP -----111hhhh111

No 463: Query=mol1A Sbjct=5cj7A Z-score=5.3

[back to top](#)

DSSP -----111111111hhhhhhhhhhhh1111hHHHHHH  
Query -----aapyspptnlrslrdrltqvaerqgvvfGRLQRH 35  
ident  
Sbjct esvpvlelfsniwgagtktaqmwyqqgfrslelrsqaslTTqqaiglkhysdfLERMPR 60  
DSSP 1hhhhhhhh111111hhhhhhhh1111hhhhhh1111hhhhhhhh1hhhhHLEEh

DSSP HHHHHHHHHHLL-LLLLLLEEEHHHHHHHHhh111111LLEEEEL-----1  
Query VAXIVVAQFAATL-TDDTGAPLLLKGGSSLELrrgipdsrTSKDFATVAR-----r 86  
ident  
Sbjct EEATEIEQTVQKAaQAFNSGLLCVACGSYRRGK-----aTCGDVDVAIthpdgrshrg 113  
DSSP HHHHHHHHHHHHHHLLLLEEEELLLLLL-----1EELEEEEEE111111111

DSSP LHHHHHHHHHHHHhh1111eeEELLEELL111111LLEEEEEEE11EEEEEEEE  
Query DIELIHEQLADAGetgwegftAIFTAPEEIAApGXPVKPRRFTAKLSYrgRAFATVPIEV 146  
ident  
Sbjct IFSRLDLSLRQEG-----FLTDDLVSQEE-nGQQKYLGVCRPLG--PGRRHRLDI 162  
DSSP LHHHHHHHHHLL-----LEEEEEEEEE-eLLEEEEEELLLL--LLLLLEEEEE

DSSP EEL-LLLL1111eeeee1hhhh111111eeeee1hHHHHhhhhhh1111111111  
Query SSV-EAGNadqfdltltsdalglvgvpaavapcxtiPWQIaqklhavtavlepkandra 205  
ident  
Sbjct IVVpYSEF-----aCALL-----yftg 179  
DSSP EEL1LLLH-----hHHHH-----hhh1

DSSP HHHHHHH-----hhhh11hHHHHhHHHHhhhhhh111  
Query HDLVDLQ-----lleg11dADLXptRSACIaifearaqh 240  
ident  
Sbjct SAHFNRSmralaktkgmslsehalstavrnrthgckvpgpRVLP--TPTEK-----dv 230  
DSSP LHHHHHHhhhhhh111ee111ee111ee1111ee11LEEL--LLLHH-----hh

DSSP 1LLLLL1111hhhhhhhh1111111111hhhhhhhhhhhh1111  
Query pWPPRVAtlphwpliyagalegldhlelartvdaaaqavqrfvaridratkr 292  
ident  
Sbjct fRLLGLP-----yrepawdw 246  
DSSP hHLLL-----111hhhh11

No 464: Query=mol1A Sbjct=5cp2A Z-score=5.3

[back to top](#)

DSSP -----111111111hhhhhhhhhhhh1111hHHHHHHHHHH  
Query -----aapyspptnlrslrdrltqvaerqgvvfGRLQRHVAXIVV 41  
ident  
Sbjct elfsniwgagtktaqmwyqqgfrslelrsqaslTTqqaiglkhysdfLERMPREEATEI 60  
DSSP 111111111hhhh111111111hhhhhh1111hhhhhhhh11hhHLEEHHHHHH

DSSP HHHHLL-LLLLLLEEEHHHHHHHHhh111111LLEEEEL-----1LHHHHH  
Query AQFAATL-TDDTGAPLLLKGGSSLELrrgipdsrTSKDFATVAR-----rDIELIH 92  
ident  
Sbjct EQTVQKAaQAFNSGLLCVACGSYRRGK-----aTCGDVDVAIthpdgrshrgIFSRL 113  
DSSP HHHHHHHhHLLLLEEEELHHHLLL-----1EELEEEEEE111111111LHHHHH

```

Query EQLADAGetgwegftAIFTAPE-EIAApgXPVKPRRFTAKLSYrgRAFATVPIEVSSV-E 150
ident | | | | |
Sbjct DSLRQEG-----FLTDDLvsQEEN--GQQQKYLGVCRPLG--PGRRRRLDIIIVpY 161
DSSP HHHHHLL-----LEEELLeEEEEE--LEEEEEEEELLLL--LLLLLEEEEEEELH

DSSP LLL1111eeeee1hhh11111eeeee1hHHHHhhhhhh11111111111HHHHH
Query AGNadqfdtltsdalglvgvpaavavpcxtiPWQIaqlhavtavleekandraHDLVD 210
ident |
Sbjct SEF-----aCALL-----yftgSAHFN 178
DSSP HHH-----hHHHH-----hhh1LHHHH

DSSP HH-----hhhhh1lHHHHhhHHHHhhhhhh1111LLL
Query LQ-----lleg111dADLXptRSACIaifearaqhpWPPR 245
ident |
Sbjct RSmralaktkgmslsehalstavrnrthgckvgpgRVLV--TPTEK-----dvfRLG 229
DSSP HHHHHhhhh1lee111lee1lee1111lee1LEEL--LLLHH-----hhHHHL

DSSP L11111hhhhhhhh1111111111hhhhhhhhhh1111
Query Vatlpwplyagaleglldhleh artvdAAAQAVQRFVARIDRAKTR 292
ident |
Sbjct L-----pyrepaerdw 240
DSSP L-----1111hh111

```

No 465: Query=mol1A Sbjct=5ca7A Z-score=5.3

[back to top](#)

```

DSSP -----11111111hhhhhhhhhhhh111hHHHHHHHH
Query -----aapyspntnrslrdrltqvaerqgvfGRLQRHVAX 38
ident |
Sbjct pvl elfsniwgagtktaqmwyqgfrsle dirsqaslttqqaiglkhysdfLERMPREEA 60
DSSP 11hhhh1111111hhhhhhhh1111hhhhhhhh1111hhhhhhhh11hhHLEEHHHH

DSSP HHHHHHHHLL-LLLLLLEEEHHHHHHhh11111LLLLLEEEEL-----1LHH
Query IVVAQFAATL-TDDTGAPLLLVKGSSLELrrgipdsrTSKDFATVAR-----rDIE 89
ident | | | |
Sbjct TEIEQTVQKaAQAFNSGLLCVACGSYRRGK-----aTCGDVDVLIThpdgrshrgIFS 113
DSSP HHHHHHHHHhhLLLLLEEEELHHHHLL-----1EELLEEEEE11111111HHH

DSSP HHHHHHHHHhh1111eeEELLE-ELL111LLLLLEEEEEE11EEEEE
Query LIHEQLADAGetgwegftAIFTAPE-EIAApgXPVKPRRFTAKLSYrgRAFATVPIEVSS 148
ident | | | |
Sbjct RLLDSLRQEG-----FLTDDLvsQEEN--GQQQKYLGVCRPLG--PGRRRRLDIIIV 161
DSSP HHHHHHHHLL-----LEEELLeEEEEE--LEEEEEEEELLLL--LLLLLEEEEEE

DSSP L-LLLL1111eeeee1hhh11111eeeee1hHHHHhhhhhh11111111111HH
Query V-EAGNadqfdtltsdalglvgvpaavavpcxtiPWQIaqlhavtavleekandraHD 207
ident |
Sbjct VpYSEF-----aCALL-----yftgSA 178
DSSP L1HHHH-----hHHHH-----hhh1LH

DSSP HHHHH-----hhhhh1lHHHHhhHHHHhhhhhh111L
Query LVDLQ-----lleg111dADLXptRSACIaifearaqhpW 242
ident |
Sbjct HFNRSmralaktkgmslsehalstavrnrthgckvgpgRVLV--TPTEK-----dvfR 229
DSSP HHHHHhhhhhh1lee111lee1lee1111lee1LEEL--LLLHH-----hhhH

DSSP LLL11111hhhhhhhh1111111111hhhhhhhhhhhhhh1111
Query PPRVatlpwplyagaleglldhleh artvdAAAQAVQRFVARIDRAKTR 292
ident |
Sbjct LLGL-----pyrepaerdw 243
DSSP HLL-----1111hh111

```

No 466: Query=mol1A Sbjct=4k4iM Z-score=5.3

```

DSSP -----
Query ----- 0
ident
Sbjct atnhnlhiteklevlakaysvqgdkwralgyakainalksfhkpvtsyqeacsipgigkr 60
DSSP 11111hhhhhhhhhhhhhhhhhh11hhhhhhhhhhhhhhhh111111hhhhhh11111hh

DSSP -----111111111hhhh
Query -----aapyspsptnlrs1 14
ident
Sbjct maekiiieilesghlrkldhisesvpvlelfsniwgagtktaqmwyqqgfrsleldirsqas 120
DSSP hhhhhhhhhhh111hhhhhh111hhhhhhhhhh111111hhhhhhhhhh1111hhhhhhhh11

DSSP hhhhhhhhhhh1111hHHHHHHHHHHHHHHHHHLL-LLLLLLEEEHhHHHHHHhh1111
Query rdr1tqvaerqgvvfGRLQRHVAXIVVAQFAATL-TDDTGAPLLLKGGSSLELrrgipd 73
ident
Sbjct lttqqaiglkhydsfLERMPREEATEIEQTVQKAaQAFNSGLLCVACGSYRRGK----- 174
DSSP 1hhhhhhhh1hhhhHLLLEHHHHHHHHHHHHHHHHHLLLLLLLEEEELHHHHLLL-----

DSSP 11111LEEEEL-----1LHHHHHHHHHHHHHHhh1111eeeEELL--EELL11111
Query srTSKDFATVAR-----rDIELIHEQLADAGetgwegftaIFTAP--EETIAApGXPV 123
ident
Sbjct -aTCGDVDVLIThpdgrshrgIFSRLLDSLREQE-----FLTDD1vSQEEN--GQQ 222
DSSP -1EELLEEEEEE111111111HHHHHHHHHHHLL-----LEEEeeEEEE--LLE

DSSP LLEEEEEEEEEE11EEEEEEEEEEEL-LLL1111leeeelhhhh11111leeeelhH
Query KPRRF TAKLSYrgRAFATVPIEVSSV-EAGNadqfdt1tsdalglv gpaavavpcxtiP 182
ident
Sbjct QKYLGVCR LPG--PGRRRRLDIIIVpYSEF-----aC 253
DSSP EEEEEEEELL--LLLLEEEEEEEL1HHHH-----hH

DSSP HHHhhhhhhhh11111111111HHHHHHH-----hhhhh
Query WQIaqklhavtavleepkandraHDLVDLQ-----llegl 217
ident
Sbjct ALL-----yftgSAHFNRSmralaktgmslsehalstavvrnthgckv 297
DSSP HHH-----hhh1LHHHHHHhhhhhhhh1leee111leee11111111111

DSSP 11hHHHHhhHHHHhhhhhh1111LLLLL11111hhhhhhhh111111111hhhhhh
Query 1ldADLXptRSACIaifearaqhpWPPRVat1phwpliyagalegldhlelartvdaaaq 277
ident
Sbjct gpgRVLP--TPTEK-----dvfRLLGL----- 317
DSSP 111LEEL--LLHH-----hhhHHHL-----

DSSP hhhhhhhhhhh1111
Query avqrfvaridratkr 292
ident
Sbjct ---pyrepaerdwle 329
DSSP ---1111hhhh11111

```

No 467: Query=mol1A Sbjct=5decB Z-score=5.3

[back to top](#)

```

DSSP 1111111111hhhhhhhhhhhhHLLLLHHHHHHHHHHHHHHHHHLLL--LLLLLLEE
Query aapyspsptnlrs1rdr1tqvaerQGVVFGRLQRHVAXIVVAQFAATLT--DDTGAPLLL 58
ident
Sbjct -----DDKWERFLVPYRQAVEELKVKLKGIRt1YEDHSPIEF 37
DSSP -----LHHHHHHHHHHHHHHHHHHHHHHHHHHHHhhHLLLLLLEE

DSSP EEhhHHHHhh11LLLL-----1LLEEEEL--LHHHHHHHHHH
Query VKggSSLElrrgIPDSR-----tSKDFATVARR--DIELIHEQLADA 98
ident
Sbjct VT--GRVK---PVASILEkarrksiplheietmqdIAGLRIMQFvdDIQIVKEMLFAR 91
DSSP EE--EEEL---LHHHHhhhhhh111111hh111LEEEEEELhhHHHHHHHHHHHLL

DSSP Hhh1111eEEEELLEEL-LLL111LLEEEEEEEL---1EEEEEEEEELL1111
Query GetgwegfTAIFTAPEEI--AAPGxpvKPRRF TAKLSYR---gRAFATVPIEVSSVEagna 154

```



DSSP L-----LLEEEEEEL11LLL111LLEEEEEEEEEEL1eEEEEEEEEEEHH----

DSSP 111eeeeelhhhh111111leeee11hhhhhHHHHHHHLL111111111111hhhhhhhh  
Query dqfdtlttsdalglvgvpaavavpcxtipwqiAQLHAVTAveepkandrahdldldl 214  
ident  
Sbjct -----mnfWATIEHSLN----- 152  
DSSP -----hhHHHHHHHH-----

DSSP hhh111hhhhhhhhhhhhhhhh111111LLLLLHhhhhhhhh1111111111hh  
Query egllldadlxptrsaciaifearaqhpwppRVATLPHWpliyagalegldhlelartvda 274  
ident  
Sbjct -----ykySGNIPEKV-----klrlqrsea 173  
DSSP -----hh111111HH-----hhhhhhhh

DSSP hhhhhhhhhhhhh1111  
Query aaqavqrfvaridratkr 292  
ident  
Sbjct asrldeemseirgevea 191  
DSSP hhhhhhhhhhhhh1111

No 468: Query=mol1A Sbjct=5deeS Z-score=5.3

[back to top](#)

DSSP 111111111111hhhhhhhhhhHLLHLLHHHHHHHHHHHHHHHHHHLL--LLLL--LL  
Query aapyspntnrlrslrdrltqvaeRQGVVFGRLQRHVAXIVVAQFAATLT--DDTG--AP 55  
ident |  
Sbjct -----DKQWERFLVPYRQAVEELKVKLKGIRt1YEYEdhSP 37  
DSSP -----LLLHHHHLHHHHHHHHHHHHHHHHHHhhHLL1111L

DSSP LEEEEhhHHHHhh1111L-----1LLEEEEEEL--LHHHHHHHH  
Query LLLVKgSSLE1rrgIPDSR-----tSKDFATVARR--DIELIHEQL 95  
ident | |  
Sbjct IEFVT--GRVK----PVAS1lekarrksiplheietmqdIAGLRIMCQFvdDIQIVKEML 91  
DSSP LLEE--EEEL----LHHHHhhhh1111hhhhhh111LLEEEEEELhhHHHHHHHH

DSSP HHHhh1111eEEELL1ee11111111LLEEEEEEL---1EEEEEEEEELL11  
Query ADAGetgwefTAIFTApeeiaagxpvKPRRFTAKLSYR---gRAFATVPIEVSSVEag 152  
ident | |  
Sbjct FARK-----DFTVVD-----RSYHLVVLPLQvtvsgEKHVLVEIQIRTLA-- 131  
DSSP HLL-----LLEEL-----LEEEEEEEEE1111EEEEEEEEEEHH--

DSSP 111111111111hhhh111111leeee11hhhhhHHHHHHHLL1111111111hhhhhh  
Query nadqfdtlttsdalglvgvpaavavpcxtipwqiAQLHAVTAveepkandrahdldldl 212  
ident  
Sbjct -----mnfWATIEHSLN----- 143  
DSSP -----hhHHHHHHHH-----

DSSP hhhhh111hhhhhhhhhhhhhh1111111111LHhhhhhh1111111111h  
Query llegllldadlxptrsaciaifearaqhpwppRVATLPHWpliyagalegldhlelartv 272  
ident  
Sbjct -----ykySGNIPEKV-----klrlqras 162  
DSSP -----hh111111HH-----hhhhhh

DSSP hhhhhhhhhhhhh1111  
Query daaaqavqrfvaridratkr 292  
ident  
Sbjct eaasrldeemseirgevea 182  
DSSP hhhhhhhhhhhhh1111

No 469: Query=mol1A Sbjct=5deeQ Z-score=5.3

[back to top](#)

```

ident |
Sbjct -----KQWERFLVPYRQAVEELKVKLGIRt1YEYEdhSP 36
DSSP -----LHHHHLHHHHHHHHHHHHHHHHHHhhHLLL111LL

DSSP LEEEEhhHHHHhhH1LLLLL-----1LLEEEEEELL--LHHHHHHHH
Query LLLVKggSSLElrrgIPDSR-----tSKDFATVARR--DIELTHEQL 95
ident |
Sbjct IEFVT--GRVK---PVASIlekarrksiplheietmqdIAGLRIMCQFvdDIQIVKEML 90
DSSP LLEE--EEL---LHHHhhhhhh111111hhh11LLEEEEEELLhhHHHHHHHH

DSSP HHHHhh111leEEEE11le111111LLEEEEEEEEL---IEEEEEEEEEELL11
Query ADAGetgwegfTAIFTapeeiaapgxpvKPRRF TAKLSYR---gRAFATVPIEVSSVEag 152
ident |
Sbjct FARK-----DFTV-----RSYHLVVLPLQtvsGKHLVLEIQIRTLA-- 128
DSSP HLLL-----LILL-----LEEEEEEEEE111IEEEEEEEEEEHH--

DSSP 1111leeeelhHHH11111leeeelhHHHHHHH1111111111hhhhhh
Query nadqfdt1tsdalglvgvpaavavpcxtipwqiAQKLHAVTAveepkandrahd1vd1q 212
ident |
Sbjct -----mnfWATIEHSLN----- 140
DSSP -----hhhHHHHHHHH-----

DSSP hhhhh11hhhhhhhhhhhhhhhh111111LLLLLHhhhhhhhh111111111h
Query l1eg11ldadlxptrsaciaifearaqhpwppRVATLPHWpliyagalegldhlelartv 272
ident |
Sbjct -----ykySGNIPEKV-----klrlqras 159
DSSP -----hh1LLLLLHH-----hhhhhhhh

DSSP hhhhhhhhhhhhhhh1111
Query daaaqavqrfvaridratkr 292
ident |
Sbjct eaasrldeemseirgevqea 179
DSSP hhhhhhhhhhhhhhh1111

```

No 470: Query=mol1A Sbjct=5f2vZ Z-score=5.3

[back to top](#)

```

DSSP 111111111hhhhhhhhhhhh1LLLHHHHHHHHHHHHHHHHLLL--LLL---LL
Query aapyspntnlrslrdrltqvaerqGVVFGRLQRHVXIVVAQFAATLT--DDTG---AP 55
ident |
Sbjct -----QWERFLVPYRQAVEELKVKLGIRt1YEYEdhSP 35
DSSP -----LHHHHLHHHHHHHHHHHHHHHHHHhhHLLL111LL

DSSP LEEEEhhHHHHhhH1LLLLL-----1LLEEEEEELL--LHHHHHHHH
Query LLLVKggSSLElrrgIPDSR-----tSKDFATVARR--DIELTHEQL 95
ident |
Sbjct IEFVT--GRVK---PVASIlekarrksiplheietmqdIAGLRIMCQFvdDIQIVKEML 89
DSSP LLEE--EEL---LHHHhhhhhh111111hhh11LLEEEEEELLhhHHHHHHHH

DSSP HHHHhh111leEEEE11le111111LLEEEEEEEEL---IEEEEEEEEEELL11
Query ADAGetgwegfTAIFTapeeiaapgxpvKPRRF TAKLSYR---gRAFATVPIEVSSVEag 152
ident |
Sbjct FARK-----DFTVV-----RSYHLVVLPLQtvsGKHLVLEIQIRTLA-- 128
DSSP HLLL-----LLEEL-----LLEEEEEEEEEe1leEEEEEEEEEHH--

DSSP 1111leeeelhHHH11111leeeelhHHHHHHH1111111111hhhhhh
Query nadqfdt1tsdalglvgvpaavavpcxtipwqiAQKLHAVTAveepkandrahd1vd1q 212
ident |
Sbjct -----mnfWATIEHSLN----- 140
DSSP -----hhhHHHHHHHH-----

DSSP hhhhh11hhhhhhhhhhhhhhhh111111LLLLLHhhhhhhhh111111111h
Query l1eg11ldadlxptrsaciaifearaqhpwppRVATLPHWpliyagalegldhlelartv 272
ident |
Sbjct -----ykySGNIPEKV-----klrlqras 159

```







DSSP hhhhllllleeeellhhhhhhhhhhhhllllllllllllhhhhhhhhhhllhhhh 223  
Query alglvgvpaavavpcxtipwqiaqklhavtavleepkandrahdldvlqllegllldadl  
ident -----  
Sbjct ----- 157  
DSSP -----

DSSP hHHHHhHHHHHLL-----  
Query xPTRSaciAIFEARAQ----- 239  
ident | |  
Sbjct wTPGY--KPNPEIYVQlikecksrgkegefstcftelqrdflnrprtklkslirlvkhwy 215  
DSSP lLLL--LLLHHHHHHhhhhhhhhllllllhhhhhhhhhhhhllllhhhhhhhhhhhh

DSSP --llllllllllllhHHHHH-----hhllllllllllhHHHH-----  
Query --hpwprvatlphwPLIYAG-----alegl dhlelar tvDAAA----- 276  
ident |  
Sbjct qtckkthgnklppqyALELLTvyaweqgsrktdfstaqgftvlelvkhqkLCIFweay 275  
DSSP hhhhhhhllllllhHHHHHHhhhhhhllllllhhhhhhhhhhhhllhhhhLEELllll

DSSP -----hh  
Query -----qa 278  
ident -----  
Sbjct ydfntpvvgromlqqlkkprpvildpadptgnvggdthswqrlaqearvwlgyppccknl 335  
DSSP lllllhhhhhhhhhhllllllleellllllllllllhhhhhhhhhhhhllllhhll

DSSP hhhhhhhhhlllll  
Query vqrfvaridratkr 292  
ident -----  
Sbjct dgslvgawtmlqki 349  
DSSP llllllllllllll

No 475: Query=mollA Sbjct=4at8A Z-score=5.2

[back to top](#)

DSSP -----llllllllllhhhhhhhhhhhhllllHHHHHHHHHHHHHHHHHH  
Query -----aapyspntnrlsrdrltqvaerqgVVFGRlQRHVAXIVVAQFAAT 47  
ident -----  
Sbjct shipdfylcemafprvkapdetsfseallkrnqdlapNSAEQASILSLVTKINNVIDN 60  
DSSP lllllhhhhllllllllllllllhhhhhhhhhhhhllllHHHHHHHHHHHHHHHHHH

DSSP L-LLLL-LLE-EEEEHHhhhhhhllllll-----lLEEEEEL--LLHHHHHHHHH  
Query L-TDDTG-APLL-LVKGGSslelrrgipDSRT-----skDFATVAR--RDIELIHEQLAD 97  
ident | | |  
Sbjct LiVAPGTfEVQIeEVRQV-----gsyKGMTtghnvADLVVILKiPTLEAVAALGNK 114  
DSSP HhLLLLlLLEeEEEE-----lhhHLLLllllleEEEEELlLLHHHHHHHHHH

DSSP HHHH-LLLL--eeEELLLeellllllllllEEEEEEeelleEEEEEEEEELLLLl  
Query AGET-GWEG--ftAIFTAPEeiaapgxpvkpRRFTAKLsygrAFATVPIEVSSVEAGNa 154  
ident | | | | | | | |  
Sbjct VVESIRAQDpsevLTMLTNE-----TGFEISS-----SDATVKILITVPPNL- 157  
DSSP HHHHhHHHLllllLEEEEL-----LEEEEL-----LLEEEEEEEELHHHh-

DSSP llleeeellhhhhllllleeeellhhhhhhHHHHHHllllllllLLLhhhhhhhh  
Query dqfdtltsdalglvgvpaavavpcxtipwqiaQKLHAVtavleepkaNDRAhdldvlql 214  
ident -----  
Sbjct -----rkldpelhldikvlqsalaaIRHARW-----feENAS----- 189  
DSSP -----llllllllllhhhhhhhhhhHHHHH-----hhHLL-----

DSSP hhhllhhhhhhhhhhhhhhhhllllllllllllHHHHHHHHLlLLL-----  
Query egllldadlxptrsaciaifearaqhpwprvatlphWPLIYAGALegLDHL----- 266  
ident |  
Sbjct -----QSTVKVlIRLlKDLRirfpgfep 212  
DSSP -----LHHHHHHHHHHHHhhhhll

```

ident |
Sbjct ltpwildllghyAVMNPnptrqplalnvaYrrclqilaagflpgsvGITDP-cESGNfrv 271
DSSP 11hhhhhhhhhhHHHL11111111hhhhhhhhhhhh1111111111LLL-1LLL11h

DSSP -----l
Query -----t 290
ident
Sbjct htvmtleqqdmvcytaqtlvrilshggfrkilgqegdasyaseistwdgvivtpsekay 331
DSSP hhh11hhhhhhhhhhhhhhhhhh11hhhh111111hhhh11eeel1eeel111111

DSSP 11
Query kr 292
ident
Sbjct ek 333
DSSP 11

```

No 476: Query=mol1A Sbjct=4at7A Z-score=5.2

[back to top](#)

```

DSSP -----1111111111hhhhhhhhhhhh11LLHHHHHHHHHHHHHHHHHHH
Query -----aapyspntnlrsldrlltqvaerqGVVFGRLQRHVAXIVVAQFAAT 47
ident
Sbjct shipfdfylcemafprvkpapedtsfseallkrnqdlapNSAEQASILSLVTKINVIDN 60
DSSP 111111hhhh111111111111hhhhhhhhhhhh11LLHHHHHHHHHHHHHHHHHH

```

```

DSSP L--LLLL-1LLEEEHHhhhhhh1111LLL-----1LEEEEL--LHHHHHHHHH
Query L--TDDTG-aPLLLVKGGSslelrrgipDSRT-----sKDFATVAR--RDIELIHEQLAD 97
ident | | | | |
Sbjct LivAPGTFevQIEEVQRV-----gsykKGTmttghnvADLVVILKiPTLEAVAALGNK 114
DSSP HhhLLLL11LEEEEEE-----hhhHLLL1111eEEEEEL11LLHHHHHHHHH

```

```

DSSP HHHH-LLLL--eeEELLLEe1111111111EEEEEEe11eEEEEEEEEELLLL11
Query AGET-GWEG--ftAIFTAPEeiaapgxpvkRRFTAKLsyrgrAFATVPIEVSSVEAGNa 154
ident | | | | |
Sbjct VVES1RAQDpsevLTMLTNE-----TGFEISS----SDATVKILITTVPPN-- 156
DSSP HHHhhHHHL1111LEEEEL-----LEEEEL-----LLEEEEEEEELHHH--

```

```

DSSP 111eeee1hhhh111111eeee11hhhhHHHHHH11111111LLLhhhhhhhh
Query dqfdtltsdalglvgpaavavpcxtipwqiaQKLHAVtavleekpaNDRAhd1vdlq11 214
ident
Sbjct -----lrkldepelhdikvlqsalaaIRHARWF-----eENAS----- 189
DSSP -----hh11111111hhhhhhhhhhHHHHH-----hHLL-----

```

```

DSSP hhh11hhhhhhhhhhhhhhhh111111111111hhHHHHHHLLL-LLLL-----
Query eglldadlxptrsaciaifearaqhpwprvatlphwpLIYAGALEGL-DHLE----- 267
ident | | |
Sbjct -----QSTVKVLIRLIKDLRirfpgf 210
DSSP -----LHHHHHHHHhhHHhhhhhh

```

```

DSSP -----111LHHH-----hhhhHHHH-----HH
Query -----larTVDA-----aaqavQRFV-----AR 285
ident |
Sbjct epltpwildllghyAVMNPnptrqplalnvaYrrclqilaagflpgsvGITDpcesgnFR 270
DSSP 1111hhhhhhhhhhHHHL11111111hhhhhhhhhhhh1111111111LLL111111L

```

```

DSSP HHLLLL-----
Query IDRATKR----- 292
ident
Sbjct VHTVMTLeqqdmvcytaqtlvrilshggfrkilgqegdasyaseistwdgvivtpseka 330
DSSP HHHHL11hhhhhhhhhhhhhhhh11hhhh111111hhhh11eeel1eeel111111

```

```

DSSP ----
Query ---- 292
ident
Sbjct yekp 334

```







Query l1eg1llldadlxptrsaciaifearaqhpwpprVATLPHWpliyagalegldhlelartv 272  
ident  
Sbjct -----ykysGNIPEKV-----klrlqras 162  
DSSP -----hh11LLLLHHH-----hhhhhhhh

DSSP hhhhhhhhhhhhhhhhh1111  
Query daaaqavqrfrvaridratkr 292  
ident  
Sbjct eaasrldeemseirgevqea 182  
DSSP hhhhhhhhhhhhhhhhh1111

No 480: Query=mol1A Sbjct=5deeX Z-score=5.2

[back to top](#)

DSSP 1111111111hhhhhhhhhhhhHLLLLHHHHHHHHHHHHHHHHHHHLLL--LLLL---11  
Query aapyspptnlrslrdrltqvaeRQGVVFGRLQRHVAXIVVAQFAATLT--DDTG---ap 55  
ident  
Sbjct -----DKQWERFLVPYRQAVEELKVKLGIRt1YEYEdhsp 37  
DSSP -----LLLLLLLLHHHHHHHHHHHHHHHHHHHHhhHLLL11111

DSSP LEEEEhhHHHHhh1LLLLL-----1LLEEEEEELL--LHHHHHHHH  
Query LLLVKggSSLElrrgIPDSR-----tSKDFATVARR--DIELIHEQL 95  
ident  
Sbjct IEFVT--GRVK---PVASIIekarrksiplheietmqdIAGLRIMCQFvdDIQIVKEML 91  
DSSP LLEE--EEL---LHHHHhhhhhh1111hhhhhh11LLEEEEEELLhhHHHHHHHH

DSSP HHHHh1111eEEEE11ee11111111LLEEEEEEEEL---1EEEEEEEEEEELL11  
Query ADAGetgwegfTAIFTapeeiaapgxpvKPRRF TAKLSYR---gRAFATVPIEVSSVEag 152  
ident  
Sbjct FARK-----DFTVV-----RSYHLVVLYPLQtvsGKHLVVEIQIRTLA-- 130  
DSSP HLLL-----LLEEL-----LEEEEEEEEEElleEEEEEEEEEEHH--

DSSP 11111eeeee1hhhh1111111111eeeee1hhhhhhHHHHHHHHL1111111111hhhhhh  
Query nadqfdt1tsdalglvgvpaavavpcxtipwqiAQKLHAVTAvelepkandrahdlvd1q 212  
ident  
Sbjct -----mnfWATIEHSLN----- 142  
DSSP -----hhHHHHHHHHH-----

DSSP hhhhh11hhhhhhhhhhhhhhhh11111111LLLLLHhhhhhhhh1111111111h  
Query l1eg1llldadlxptrsaciaifearaqhpwpprVATLPHWpliyagalegldhlelartv 272  
ident  
Sbjct -----ykysGNIPEKV-----klrlqras 161  
DSSP -----hh11LLLLLH-----hhhhhhhh

DSSP hhhhhhhhhhhhhhhhh1111  
Query daaaqavqrfrvaridratkr 292  
ident  
Sbjct eaasrldeemseirgevqea 181  
DSSP hhhhhhhhhhhhhhhhh1111

No 481: Query=mol1A Sbjct=4e7xC Z-score=5.2

[back to top](#)

DSSP 1111111111hhhhhhhhhhhh11LHHHHHHHHHHHHHHHHHHHLLL11111LLEEEE  
Query aapyspptnlrslrdrltqvaeRQGVVFGRLQRHVAXIVVAQFAATLTddtgaPLLVK 60  
ident  
Sbjct -----hkeftkfcyevyeikiSDKEFKKRAALDTLRLCLKRIS-----PDAELV 46  
DSSP -----11hhhhhhhhhhhh11LHHHHHHHHHHHHHHHHHHHHL-----LLEEEE

DSSP HHHhhhhhh111LLLL---1LLEEEEEEL1hhHHHHHHHHHHHHH111eEEEELLEE1  
Query GGsslelrrgipDSRT---sKDFATVARRdieLIHEQLADAGETGwegfTAIFTAPEEi 116  
ident  
Sbjct AF-----gsleSGLA1knsdM DLCVLMDD---TIALQFYEELIAE---GFEGKFLQR- 92

```

DSSP 111111LLEEEEEEEeellleeEEEEEEEEe11111111eeeee1hhhh11111lee
Query aapgxpVKPRRFATAKLSyrgraFATVPIEVSSveagnadqfdtlttsdalglvgvpaavav 176
ident
Sbjct -----aRIPIIKLTS-----SFQCDIGFN----- 111
DSSP -----1LEEEEEELL-----LLEEEEEEL-----

```

```

DSSP e11hhhhhhhhHHHHHh1111111111hhhhhhhhhh1lhhhhhhhhhhhhhhhh
Query pcxtipwqiaqKLHAVtavleepkandrahdldlqllegl11dadlxptrsaciaifea 236
ident
Sbjct -----nrlaiHNTLL----- 121
DSSP -----1hhhhHHHHH-----

```

```

DSSP h1111111111111HHHHhHHHLL--L--L-----1111LHHHHHH
Query raqhpwpprvatlphWPLIyAGALEG--LDHL-----elarTVDAAAQ 277
ident
Sbjct -----lssytkLDAR-LKPMVLLvKHWAKrkqinspyfgtllssygyvmlVLYYLIIH 171
DSSP -----1hhhhhhHLLL-HHHHHHhhHHHHhh11111hhhh11111hhhhhhhhHHHHHHH

```

```

DSSP -----
Query ----- 277
ident
Sbjct vikppvfpnlllsplkqekivdgfdvgfddkledippsqnysslgslhgfrrfyaykfe 231
DSSP 1111111111111111lee1lee111111hhhh11111111hhhhhhhhhhhhhh11

```

```

DSSP -----hhHHHH---hhhhHLLL-----
Query -----avQRFV---aridRATKR----- 292
ident
Sbjct prekvvtFRRPdgyltkqEKGWTSatedryilaiedpfeishnvgrtvsssglyrirgef 291
DSSP 1111lee1LLL11111hhHLLL111111lee11111111111111hhhhhhhhhh

```

```

DSSP -----
Query ----- 292
ident
Sbjct maasrllnsrscopydylfleepi 316
DSSP hhhhhhh1111111hhhh1111

```

No 482: Query=mol1A Sbjct=4e80C Z-score=5.2

[back to top](#)

```

DSSP 111111111hhhhhhhhhhhh11LHHHHHHHHHHHHHHHHHLL11111LLEEEE
Query aapyspntnrlsrldrltqvaerqgVVFGRQLQRHVAXIVVAQFAATLTdtdgaPLLLVK 60
ident
Sbjct -----keftkfcyevyneikiSDKEFKKRAALDTLRLCLKRIS----PDAELV 45
DSSP -----11hhhhhhhhhh11LHHHHHHHHHHHHHHHHHLL-----LLEEE

```

```

DSSP HHHhhhhhh1111LLL-----LLEEEEL11hHHHHHHHHHHHH111eEEEEL
Query GGslelrrgipdSRTS-----KDFATVARrdiELIHEQLADAGETGwegfTAIFT 111
ident
Sbjct AF-----GSLEsglalknsdMDLCVLMdsrsDTIALQFYEEELIAE----GFEGK 90
DSSP EE-----LHHhh11111111EEEEEEL1111LHHHHHHHHHHHH-----LLEEE

```

```

DSSP LLEE111111LLEEEEEEEe1leeEEEEEEEEe11111111eeeee1hhhh1111
Query APEEiaapgxVKPRRFATAKLSyrgraFATVPIEVSSveagnadqfdtlttsdalglvgvp 171
ident
Sbjct FLQR-----ARIPIIKLTS-----FQCDIGFN----- 113
DSSP EEEE-----LLEEEEEEEEL-----LLEEEEEL-----

```

```

DSSP 11eeeee1hhhhhhhhhhhh1111111111LHHhhhhhhhh1lhhhhhhhhhh
Query aavavpcxtipwqiaqklhavtavleepkandrahdldlqllegl11dadlxptrsaci 231
ident
Sbjct -----nrlaihntLLLS----- 125
DSSP -----1hhhhhhHHHH-----

```

```

DSSP hhhhh111111111111LHHhhHHHHL-1LLL-----1LLLh

```

```

Sbjct -----sytkLDAR-LKPMVLLvKHWAkrkqinspyfgtLssygyvLMVL- 168
DSSP -----hhhhLLLL-HHHHHHHhHHHHhh1111hhh1111hhhhHHHH-

DSSP hHHHH-----
Query dAAAQ----- 277
ident
Sbjct yYLIVikppvfpnllsplsokqekivdgdvdfddkledippsqnysslgsllhgffrfy 228
DSSP hHHHH1111111111hhh11111leelee11111hhh1111111111hhhhhhhhhhhh

DSSP -----hhhHHHH-----hhhLLLL-----
Query -----avqRFVA-----ridRATKR----- 292
ident
Sbjct aykfeprekvvTFRRpdygtkqEKGWTSatehtgsadqiikdryilaiedpfeishvng 288
DSSP hh1111111111LLL11111hhHHLLL1leee11111leee111111111111111111111111

DSSP -----
Query ----- 292
ident
Sbjct rtvsssglyriragefmaasrllnsrsypipydslf eeapipp 330
DSSP 1111hhhhhhhhhhhhhhhhhh11111111hhhh111111

```

No 483: Query=mollA Sbjct=3mdcA Z-score=5.2

[back to top](#)

```

DSSP -----
Query ----- 0
ident
Sbjct lhitklevlakaysvqgdkwralgyakainalksfhkpvtisyqeacsipigkrmaeki 60
DSSP 11hhhhhhhhhhhhhh111hhhhhhhhhhhhhh11111111hhhh11111hhhhhhhh

DSSP -----1111111111hhhhhhhh
Query -----aapyspptnlrsldr1t 19
ident
Sbjct ieilesghlrkldhisesvpvlelfnisniwgagtktaqmwyyqgfrsledirsqsalttqq 120
DSSP hhhhhh111hhhh1111hhhhhhhh11111hhhhhhhh11111hhhhhh1111hhhh

DSSP hhhhh1111hhhhHHHHHHHHHHHHHL-LLLLLLLEEEHHHHHHHHhh11111LLL
Query qvaerqgvfgrlQRHVAXIVVAQFAAT-LTDDTGAPLLL VKGGSLELrrgipdsrTSK 78
ident
Sbjct aiglkhysdflerMPREEATEIEQTVQKaAQAFNSGLLCVACGSYRRGK-----aTCG 173
DSSP hhhhh111hhhh11EEHHHHHHHHHHHHHHHHHLLEEEELHHHHLLL-----LEEL

DSSP LEEEEEL-----1LHHHHHHHHHHHHHHhh1111eeEEELLEEL11111LLLLEEEEE
Query DFATVAR-----rDIELIHEQLADAGetgwegftAIFTAPEElaapgxPVKPRRFTA 130
ident
Sbjct DVDVLIThpdgrshrgIFSRLDLSLRQEG-----FLTDDLVSQ-eengQQKYLVC 224
DSSP LEEEEEL1111111111HHHHHHHHHHHL-----LEEEEL-11111LLLLEEEEE

DSSP EEEEE1EEEEEEEEEEEL-LLLL1111eeee1hhhh11111eeee11hHHHHhhhh
Query KLSYrgRAFATVPIEVSSV-EAGNadqfdt1tsdalglvvpaaavpcxtiPWQIaqk1 189
ident
Sbjct RLPG--PGRRRRLDIIVVpYSEF-----aCALL---- 251
DSSP LLLL--LLLLLEEEEEEL1HHHH-----hhHHH----

DSSP hhhh1111111111HHHHHHHH-----hhhh11hHHHHhhHHHHhhhh
Query havtavleepkandraHDLVDLQ-----lleg11ldADLXptRSACIaif 234
ident
Sbjct -----yftgSAHFNRSmralaktgmslsehalstaggRVLP--TPTEK--- 294
DSSP -----hhhLHHHHHHHHhhhhhh1leee1111lee1111LLL--LLLH----

DSSP hhh11111111111hhhhhhhh1111111111hhhhhhhhhhhhhh1111
Query earaqhPWPPRVat1phwpliayagelgdhlelartvdaaavqrfvaridrskr 292
ident
Sbjct ---dvfRLLGLP-----yrepawrdw 312
DSSP ---hhHHLLLL-----11hhhh11

```

No 484: Query=mol1A Sbjct=3upqA Z-score=5.2

[back to top](#)

```
DSSP -----
Query ----- 0
ident
Sbjct hnlhiteklevlakaysvqgdkwralgyakainalksfhkpvttsyqeacsipgigkrmae 60
DSSP 1111hhhhhhhhhhhhhhhh111hhhhhhhhhhhhhh11111111hhhhhh11111hhhhh

DSSP -----111111111hhhhhhh
Query -----aapyspntlrsldr 17
ident
Sbjct kiieilesghlrkldhisesvpvlelfsniwgagtktaqmwyqgfrsleldirsqasltt 120
DSSP hhhhhhh111hhhh1111hhhhhhhh11111hhhhhhhh11111hhhhhh1111h

DSSP hhhhhh1111hhhhHHHHHHHHHHHHHHH-LLLL1111LLEEEHHHHHHHHhh11111L
Query ltqvaerqgvfgrlQRHVAXIVVAQFAA-TLTDdtGAPLLLVKGGSSLELrrgipdsrT 76
ident
Sbjct qqaiglkhysdflerMPREEATEIEQTVQkAAQAFnSGLLCVACGSYRRGK-----aT 173
DSSP hhhhhh1hhhh11EEHHHHHHHHHHHHHLL111LLEEEELHHHHLL-----1E

DSSP LLEEEEL-----1LHHHHHHHHHHHHhh1111eeEELLLEEL11111LLEEE
Query SKDFATVAR-----rDIELIHEQLADAGetgwegftAIFTAPEEiaapgxPKPRRF 128
ident
Sbjct CGDVDVLIThpdgrshrgIFSRLDSLREQE-----FLTDDLKVG-----ETKYLG 219
DSSP EEEEEEE11111111LHHHHHHHHHHLL-----LEEEEEE-----LLEEE

DSSP EEEEE11EEEEEEEEEEEL-LLLL1111eeee1hhhh11111eeee1hHHHHhh
Query TAKLSYrgRAFATVPIEVSSV-EAGNadqfdtltsdalglvgvpaavavpcxtiPWQIa 187
ident
Sbjct VCRLPG--PGRRRRLDIIVVpYSEF-----aCALL-- 248
DSSP EELLLL--LLLLLEEEEEEEL1HHHH-----hHHHH--

DSSP hhhhhh111111111111HHHHHHH-----hhhhh1hHHHHhhHHHHHHhh
Query klhavtavleepkandraHDLVDLQ-----1leg111dADLXptRSACIai 233
ident
Sbjct -----yftgSAHFNRSmralaktkgmslsehalstavgRVLP--TPTEK-- 290
DSSP -----hhh1LHHHHHHhhhhhh11eeel111eeel11LEEL--LLLHH--

DSSP hhhh1111LLLL11111hhhhhhhh1111111111hhhhhhhhhhhhhhhh111
Query fearaqhpWPPRVat1phwpliyagalegl dhlelartvdaaaqavgrfvaridratkr 292
ident
Sbjct -----dvfRLLGL-----pyrepaerdw 308
DSSP -----hhHHLL-----1111hhhh11
```

No 485: Query=mol1A Sbjct=1xslE Z-score=5.2

[back to top](#)

```
DSSP -----
Query ----- 0
ident
Sbjct nnlhiteklevlakaysvqgdkwralgyakainalksfhkpvttsyqeacsipgigkrma 60
DSSP 111hhhhhhhhhhhhhhhh111hhhhhhhhhhhhhh11111111hhhhhh11111hhhhh

DSSP -----111111111hhhhhhh
Query -----aapyspntlrsldr 16
ident
Sbjct ekiieilesghlrkldhisesvpvlelfsniwgagtktaqmwyqgfrsleldirsqaslt 120
DSSP hhhhhhhhh111hhhh11111hhhhhhhh111111hhhhhhhh11111hhhhhh1111

DSSP hhhhhhh1111hHHHHHHHHHHHHHHHHLL-LLLLLLEEEHHHHHHHHhh11111
Query rltqvaerqgvfGRLQRHVAXIVVAQFAATL-TDDTGAPLLLVKGGSSLELrrgipdsr 75
ident
```

DSSP LLLLLLEEEL-----1LHHHHHHHHHHHHhh1111eeEELLLE-ELLL11LLLLLE  
Query TSKDFATVAR-----rDIELIHEQLADAGetgwegftAIFTAPE-EIAApgXPVKPR 126  
ident | | | | |  
Sbjct TCGDVDVLITHpdgrshrgrIFSRLDLSLRQEG-----FLTDDLvsQEEN--GQQQKY 223  
DSSP EELLEEEEEE11111111LHHHHHHHHHHLLL-----LEEEEEeEEEE--LLEEEE

DSSP EEEEEEEE1EEEEEEEEEEEL-LLLL111leeeelh1111leeeelhHHHH  
Query RFTAKLSYrgRAFATVPIEVSSV-EAGNadqfdtlttsdalglvgvpaavavpcxtiPWQI 185  
ident | | | | |  
Sbjct LGVCRLPG--PGRHRRLDIIVVpYSEF-----aCALL 254  
DSSP EEEELLLL--LLLLLEEEEEEEL1HHHH-----hHHHH

DSSP hhhhhhhh1111111111HHHHHH-----hhhhhllhhhhhhh  
Query aqk1havtavlepkandraHDLVDLQ-----llegllldadlxpt 226  
ident | | | | |  
Sbjct -----yftgSAHFNRSmralaktgmslsehalstavrnrthgckvgpg 298  
DSSP -----hhl1LHHHHHHhhhhhh1leee111leee1111111111

DSSP hhhHHHHhhhh1111LLLLL1111hhhhhhhhh1111111111hhhhhhhhhhhhhh  
Query rsaCIAIfearaqhpWPPRVAtlphwpliyagaleglhdhlelartvdaaaqavqrfvari 286  
ident | | | | |  
Sbjct rv1PPT---ekdvfRLLGLP-----yre 319  
DSSP leeLLL---hhhhHHLLL-----111

DSSP hh1111  
Query dratkr 292  
ident | | | | |  
Sbjct paerdw 325  
DSSP hhh111

No 486: Query=mol1A Sbjct=5deey Z-score=5.2

[back to top](#)

DSSP 1111111111hhhhhhhhhhHLLLLHHHHHHHHHHHHHHHHHHLL--LLL--LL  
Query aapyspntnlrsldr1tqvaerQGVVFGRLQRHVAXIVVAQFAATLT--DDTG---AP 55  
ident | | | | |  
Sbjct -----DKQWERFLVPYRQAVEELKVKLGIRt1YEYEdhSP 37  
DSSP -----LHHHHHHHHHHHHHHHHHHHHHHHHHHhhHHH111L

DSSP LEEEEhHHHHhh1LLLL-----1LLEEEEL--LHHHHHHH  
Query LLLVKggSLElrrgIPDSR-----tSKDFATVARR--DIELIHEQL 95  
ident | | | | |  
Sbjct IEFVT--GRVK---PVASilekarrksiplheietmqdiAGLRIMCQfvdDIQIVKEML 91  
DSSP LLEE--EEL---LHHHHhhhhhh1111hhhhhh11LEEEEEEELhhHHHHHHHH

DSSP HHHHhh111leEEEELLle11111111LEEEEEEEL---1EEEEEEEEELL11  
Query ADAGetgwegftAIFTAPEeiaapgxvkkPRRFTAKLSYR---GRAFATVPIEVSSVEag 152  
ident | | | | |  
Sbjct FARK-----DFTVVDQ-----SYHLVLYPLQvtvsGKHLVVEIQIRTLA-- 131  
DSSP HLL-----LLEELL-----LEEEEEEEL11LEEEEEEELH--

DSSP 1111leeeelh1111leeeelh1111leeeelhHHHHHHHL11111111hhhhhhh  
Query nadqfdtlttsdalglvgvpaavavpcxtipwqiAQKLVAVTAVlepkandrahdldvlq 212  
ident | | | | |  
Sbjct -----mnfWATIEHSLNY----- 144  
DSSP -----hhhHHHHHHHHH-----

DSSP hhhhhllhhhhhhhhhhhhhhhh11111111LLLLLHhhhhhhhh11111111h  
Query llegllldadlxptrsaciaifearaqhpwppRVATLPHWpliyagaleglhdhlelartv 272  
ident | | | | |  
Sbjct -----kySGNIPEKV-----klrlqras 162  
DSSP -----h1LLLLLHH-----hhhhhhh







DSSP lhhhhhhhhhhllhhhhlllhhhhhhhhhhhhhhhhhhhhlllllllllhhhhhhhhhhhh

DSSP h1111hhhhHHHHHHHHHHHHHHLL111111LLEEEHHHHHHHHHHLL11LLLLLLEEEEE  
Query rqqvfvgrlqRHVAXIVVAQFAATLdtdtgaPLLLVKGSSLELRGipDSRTsKDFATV 83  
ident | | | | | | | | | | | | | | | | | | | | | |  
Sbjct smnvavvsslVKNVNLMEEYLRRH----nKSCICYGSYSLYLINP--NIRY-GDIDIL 172  
DSSP hh111111lHHHHHHHHHHHHHHHL-----LLEEEELHHHHHLLL--LLLL-LLEEEE

DSSP ELL1HHHHHHHHHHHHHHL1l1eeeEELL1EELL111111LLEEEEEEEeelleeEEEE  
Query ARRdIELIHEQLADAGETGwegftaIFTApEEIAApgxpvKPRRFTAklSYrgrafATVP 143  
ident | | | | | | | | | | | | | | | | | | | | | |  
Sbjct QTN-SRTFLIDLAFLIKFI--tgnnIILS-KIPYL----RNYMVIKD----endNHII 218  
DSSP ELL-HHHHHHHHHHHHHHH--h111LEEE-ELLLL-----LLEEEEL-----111LEEE

DSSP EeEEEL----LLLL11LLEEEEelhhhh111111eEEEELHHHHHHHHHHHHLL111  
Query IeVSSV---EAGNadQFDTLTsdalglvgvpaavAVPCXTIPWQIAKQLHAVTAVLeep 199  
ident | | | | | | | | | | | | | | | | | | | | | |  
Sbjct D-SFNIRqdtMNVV--PKIFID-----NIYIVDPTFQLLNMKMFSDID--- 259  
DSSP E-EEELhhhHHHL--LEEEL-----LLEEELHHHHHHHHHLLLHH---

DSSP LLLL---LHHHHHHHHHHHHH--LHHH-----  
Query kANDR---AHDLVDLQLEGLL--LDAD----- 222  
ident | | | | | | | | | | | | | | | | | | | | | |  
Sbjct rLEDLskdpEKFNARMATMLEYVryTHGIvfdgkrnmmpkciidennrivtvttkdyfs 319  
DSSP hHHHHh111LHHHHHHHHHHHHHhHLLL111111111111eellllleeeel11111

DSSP -----hhhhhhhhhhhhHLLL-----  
Query -----lxptrsaciaifeaRAQHP----- 241  
ident | | | | | | | | | | | | | | | | | | | | | |  
Sbjct fkkclvyldenvlssdildlnadtscdfesvtnsvylidhniytyFSNTI1l1sckgkvh 379  
DSSP l1eeeee1lhhhhhhhhhh111111eelhgh11leeeel1leeeelLLLLeeeel1leel

DSSP LLLL11111hhhhhhhhhh11111111111hhhhhhhhhhHHHHH-----hHLLL--  
Query wPPRVatlpwpliayagalegldhlelartvdaaaqavrFVARI-----dRATK-- 291  
ident | | | | | | | | | | | | | | | | | | | | | |  
Sbjct eISAR-----g1CAHILlyqmltsgeYKQClS 406  
DSSP hHHHH-----hhHHHHhhhhhh111LHHHh

DSSP -----l  
Query -----r 292  
ident | | | | | | | | | | | | | | | | | | | | | |  
Sbjct dllnsmnrdkipiyshterdkkpgrhgfniiekdiivf 445  
DSSP hhhh1111111111ee1111111111leee111leee1

No 490: Query=mol1A Sbjct=5iioM Z-score=5.2

[back to top](#)

DSSP -----  
Query ----- 0  
ident | | | | | | | | | | | | | | | | | | | | | |  
Sbjct tnhlhiteklevlakaysvqgdkwralgyakainalksfhkpvtysqeacsipigikrm 60  
DSSP 1111hhhhhhhhhhhhhhhhllhHHHHHHHHHHHHHHH111111hhhh111111h

DSSP -----111111111hhhhh  
Query -----aapyssptnlrslr 15  
ident | | | | | | | | | | | | | | | | | | | | | |  
Sbjct aekiieilesghlrkldhisesvuplelfsniwagtktaqmwyqqgfrsledirsasl 120  
DSSP hhhhhhhhhhh111hhhh11111hhhhhhhh11111hhhhhhhhhh11111hhhhhhhh111

DSSP hhhhhhhhh1111lHHHHHHHHHHHHHHHLL-LLLLLLLEEEHHHHHHHHhh1111  
Query drltqvaerqgvfGRLQRHVAXIVVAQFAATL-TDDTGAPLLLVKGSSLELRrgipds 74  
ident | | | | | | | | | | | | | | | | | | | | | |  
Sbjct ttqqaiglkhysdflERMPREATEIEQTVQKAaQAFNSGLLCVACGSYRRGK----- 173  
DSSP 1hhhhhhhhhhhhHLEEHHHHHHHHHHHHHHLLL111LLEEEELHHHHLLL-----



DSSP hhhhhHHHHHHhhhhhh1111LLLLL1111hhhhhhhhh11111111hhhhhhhhh  
Query dlxptRSACIaifearaqhpWPPRVatlpwpliyagalegl dhlelartvdaaaqavqr 281  
ident  
Sbjct grvlpTPTEK-----dvfRLLGL----- 316  
DSSP llee11LLHH-----hhhHLLL-----

DSSP hhhhhh1111  
Query fvaridratkr 292  
ident  
Sbjct -pyrepaerdw 326  
DSSP -1111hhh111

No 492: Query=mol1A Sbjct=5iijA Z-score=5.2

[back to top](#)

DSSP -----  
Query ----- 0  
ident  
Sbjct hnlhiteklevlakaysvqgdkwralgyakainalksfhkpvtisyqeacsipgigkrmae 60  
DSSP 1111hhhhhhhhhhhh111hhhhhhhhhhhhhh1111111hhhh1111hhhhh

DSSP -----11111111hhhhhhh  
Query -----aapysspptnlrslrdr 17  
ident  
Sbjct kiiieilesghlrkldhisesvpvlelf sniwigagtkaqmwyqqgfrslelrsqsltt 120  
DSSP hhhhhhhh111hhhh1111hhhhhhhh11111hhhhhhhh1111hhhhhhh111h

DSSP hhhhhh1111hhHHHHHHHHHHHHHHLL-LLLLLLLEEEHHHHHHhh11111L  
Query ltqvaerqgvvfgrLQRHVXIVVAQFAATL-TDDTGAPLLLKVGGSSELRrgipdsrT 76  
ident  
Sbjct qqai glkhysdf1ERMPREEATEIEQTVQKaAQAFNSGLLCVACGSYRRGK-----aT 173  
DSSP hhhhhh1hhhhhLLEEHHHHHHHHHHHHHHHLLLLLLLEEELHHHHLL-----1E

DSSP LLLLLLLEEL-----1LHHHHHHHHHHHHhh1111eeEEEELLEEL11111LLLEEE  
Query SKDFATVAR-----rDIELIHEQLADAGetgwegftAIFTAPEE IaapgxPVKPRRF 128  
ident  
Sbjct CGDVDVLIthpdgrshrgIFSRLDLSLRQEG-----FLTDDLVSQ-eengQQQKYL G 224  
DSSP ELLEEEEEE11111111LHHHHHHHHHHLL-----LEEEEEEEL-11111LLLEEE

DSSP EEEEE11EEEEEEEEELLLLL11leeeehhh1111leeeehhhHHHHhh  
Query TAKLSYrgRAFATVPIEVSSVEAGNAdqfdtltaldalgvpaavavpcxtiPWQIaqk 188  
ident  
Sbjct VCRLPG--PGRRHRRLDIIVVYSEF-----aCALL--- 253  
DSSP EELLLL--LLLLEEEEEEELHHHH-----hHHHH--

DSSP hhhhh1111111111HHHHHHH-----hhhh11hHHHHhhHHHHhh  
Query lhavtavleepkandraHDLVdlQ-----lleg111dADLXptRSACIai 233  
ident  
Sbjct -----yftgSAHFNRSmralaktkgmslsehalsstavpgrVLP--TPTEK-- 296  
DSSP -----hh1LHHHHHHhhhhhh1lee111lee1111LLL--LLLH--

DSSP hhhh111LLLLL1111hhhhhhhh111111111hhhhhhhhhhhhhhhh111  
Query fearaqhWPPRVatlpwpliyagalegl dhlelartvdaaaqavqrfvaridratkr 292  
ident  
Sbjct ---dvfrLLGLPY-----repaerdw 314  
DSSP ---hhhHLLL-----11hhhh11

No 493: Query=mol1A Sbjct=5cwrB Z-score=5.2

[back to top](#)

DSSP -----

```

Sbjct tnhnlhiteklevlakaysvqgdkwralgyakainalksfhkpvtisyqeacsipgigkrm 60
DSSP 1111hhhhhhhhhhhhhhhhhh11hhhhhhhhhhhhhhhh111111hhhhhh111111hhh

DSSP -----111111111hhhhh
Query -----aapyspntnlrslr 15
ident

Sbjct aekiieilesghlrkldhisesvpvlelfsnwigagtktaqmwyqqgfrsleldirsqasl 120
DSSP hhhhhhhhh111hhhh1111hhhhhhhh111111hhhhhhhh1111hhhhhhhh111

DSSP hhhhhhhhh1111hHHHHHHHHHHHHHHHLL-LLLLLLLLLEEEHHHHHHHHhh1111
Query drltqvaerqgvfGRLQRHVAXIVVAQFAATL-TDDTGAPLLLKVGSSLELrrgipds 74
ident
Sbjct ttqqaiglkhsydfLERMPREEATEIEQTVQKaaQAFNSGLLCVACGSYRRGK----- 173
DSSP 1hhhhhhhh1hhhhHLEEHHHHHHHHHHHHHHLLLLLLLEEEELHHHHLLL-----

DSSP 1LLLLLEEEEL-----1LHHHHHHHHHHHHhh1111eeEEELLEEL1111LLLLLE
Query rTSKDFATVAR-----rDIELIHEQLADAGetgwegftAIFTAPEElaapgXPVKPR 126
ident | | |
Sbjct aTCGDVDVAIThpdgrshrgIFSRLLDLSLRQEG-----FLTDDLVSQ---GQQQKY 221
DSSP 1EELLEEEEEE11111111HHHHHHHHHHHLL-----LEEEEEEEL---LLEEE

DSSP EEEEEEE11EEEEEEEEEEEL-LLLL1111eeeeelhhhh111111eeeeelhhHHHH
Query RFTAKLSYrgRAFATVPIEVSSV-EAGNadqfdtlttsdalglvgpaavavpcxtiPWQI 185
ident | |
Sbjct LGVCRLPG--PGRRHRRLDIIVVpYSEF-----aCALL 252
DSSP EEEELLLL--LLLLLEEEEEEEL1HHHH-----hHHHH

DSSP hhhhhhh111111111111HHHHHHH-----hhhh1lh
Query aqklhavtavlepkandraHDLVDLQ-----llegl1ld 220
ident
Sbjct -----yftgSAHFNRSmralaktkgmslsehalstavvrnthgckvpgp 296
DSSP -----hhhlLHHHHHHhhhhhh11eeel111eeel1111eeel1111eeel11

DSSP HHHHhhHHHHhhhhhh1111LLLLL11111hhhhhhhh1111111111hhhhhhhh
Query ADLXptRSACIaifearaqhPWPPRVat1phwpliyagalegldhlelartvdaaaqavq 280
ident |
Sbjct RVLP--TPTEK----dvfrLLGLPY----- 315
DSSP LEEL--LLLHH----hhhhHLLLLL-----

DSSP hhhhhhh1111
Query rfvaridratkr 292
ident
Sbjct ----repaerdw 323
DSSP ----11hhhh11

```

No 494: Query=mol1A Sbjct=5f2vU Z-score=5.2

[back to top](#)

```

DSSP 111111111hhhhhhhhhhhhHLLLLHHHHHHHHHHHHHHHHHHHLL--LLL--LL
Query aapyspntnlrslrdrltqvaerQGVVfGRLQRHVAXIVVAQFAATLT--DDTG---AP 55
ident
Sbjct -----DKQWERFLVPYRQAVEELKVKLGIRt1YEYEdhSP 37
DSSP -----LHHHHHHLHHHHHHHHHHHHHHHHHHHHhhHHH111LL

DSSP LEEEEhhHHHHhh11LLLL-----1LLEEEEEEEL--LHHHHHHHH
Query LLLVKggSSLElrrgIPDSR-----tSKDFATVARR--DIELIHEQL 95
ident | | |
Sbjct IEFVT--GRVK---PVASILEkarrksiplheietmqdIAGLRIMCQFvdDIQIVKEML 91
DSSP LLEE--EEL---LHHHHhhhhhh1111hhhhhh111LEEEEEEELhhHHHHHHHH

DSSP HHHHhh1111eEEELLe1111LLLLLEEEEEEEL---1EEEEEEEEEEEL11
Query ADAGetgwegftAIFTapeeiaapGXPVKPRRF TAKLSYR---GRAFATVPIEVSSVEag 152
ident | |
Sbjct FARK-----DFTVVD-----ESGYRSYHLVVLYPLQtvsGKHVLEIQTIRTLA-- 135
DSSP HLLL-----LLEEEL-----LLHHHEEEEEEEEEEEe11eEEEEEEEEEEHH--

```



DSSP -EEEEhhHHHHhhhllLLLL-----1LLEEEEEEL--LHHHHHHHHH  
Query -LLVKgSSLElrrgIPDSR-----tSKDFATVARR--DIELTHEQL 95  
ident | | | | | | | | | | | | | | | |  
Sbjct iEFVT--GRVK----PVASIlekarrksiplheietmqdIAGLRIMCQFvdDIQIVKEML 91  
DSSP 1LEEE--EDEL----LHHHHhhhhhh1111hhhhhh11LEEEEEELhhHHHHHHHHH

DSSP HHHHhh1111eEEEEL1leell11111111LEEEEEEEEL---1EEEEEEEEEEEEEL11  
Query ADAGetgwegfTAIFTapeeiaapgxpvKPRRF TAKLSYR---gRAFATVPIEVSSVEag 152  
ident | | | | | | | | | | | | | | | |  
Sbjct FARK-----DFTV-----RSYHLVVLYPLQtvsGKHLVLEIQIRTLA-- 130  
DSSP HLL-----LEEL-----LEEEEEEEEL1leEEEEEEEEEEHH--

DSSP 1111leeeelh1111leeeelh1111111111HHHHHHHLL1111111111hhhhhhh  
Query nadqfdlttsdalglvgvpaavavpcxtipwqiAQKLHAVTAveelpkandrahd1vd1q 212  
ident | | | | | | | | | | | | | | | |  
Sbjct -----mfwATIEHSLN----- 142  
DSSP -----h1111111111-----

DSSP hhhhh11hhhhhhhhhhhhhhhhhh1111111111111111111111111111111111h  
Query l1eg111dadlpxtrsaciaifearaqhwppRVATLPHWpliyagaleglhdhlelartv 272  
ident | | | | | | | | | | | | | | | |  
Sbjct -----ykySGNIPEKV-----klrlqrass 161  
DSSP -----1111111111-----hhhhhhh

DSSP hhhhhhhhhhhhhhh1111  
Query daaaqavqrvaridratkr 292  
ident | | | | | | | | | | | | | | | |  
Sbjct eaasrldemseirgevqea 181  
DSSP hhhhhhhhhhhhhhh111

No 497: Query=mol1A Sbjct=3ouxA Z-score=5.2

[back to top](#)

DSSP -----LLL--1111111111  
Query -----AAPY--ssPPTNLRS 13  
ident | | | | | | | | | | | | | | | |  
Sbjct raipeltkllndedqvvnkaavmvhqlskkearshairmspqMVAivrtmqNTNDVET 60  
DSSP 11hhhhhhhh111111hhhhhhhhhh111111111111111111111111hhHHHHhhhhhhHLLHHH

DSSP HHHHHHHHHHHLL-----11HHHHHHHHHH-----hhh  
Query LRDRLTQVAERQG-----vfvGRLQRHVAXIV-----vaqf 44  
ident | | | | | | | | | | | | | | | |  
Sbjct ARCTAGTLHNLSHhregllaifksgGIPALVKMLGSpvdsvlfyaittlhnl11hgegak 120  
DSSP HHHHHHHHHHHLL1111hhhhhh11HHHHHHHHHH11hhhhhhhhhhhhhhhh111hh

DSSP hh1111111111eEEH-----HHHHHHHLL1111111111eell11hhhhhhhh  
Query aat1tdtgap11LVKG-----GSSLELRRGipdsrtskdfatvarrdieliheqla 96  
ident | | | | | | | | | | | | | | | |  
Sbjct mavrlagglqkmvALLNktnvkflaITTDCLQIL----- 154  
DSSP hhhhhh11hhhhhhHHH1111hhhhHHHHHH-----

DSSP hhhhh1111eell11eell1111111111eell11eell11111111  
Query dagetgwegftaiftapeeiaapgxpvkprftaklsyrgrafatvpiessveagnadq 156  
ident | | | | | | | | | | | | | | | |  
Sbjct ----- 154  
DSSP -----

DSSP 1eeee11hhhh111111eell1111111111HHHHHHHHHH1111111111LLHHHHHHHHHH  
Query fdt1tsdalglvgvpaavavpcXTIPWQIAQKLHAVTavleepkandRAHD1VLDLQLEG 216  
ident | | | | | | | | | | | | | | | |  
Sbjct -----aygnqesklilaSGGPQALVNIMRTY-----tYEKLLWTTSRVVK 195  
DSSP -----h111hhhhhhhhLLHHHHHHHHHH-----1LHHHHHHHHHH

```
ident | | |
Sbjct VLSvCSSNKPAIVEAG-----gmqalGLHLT-----dPSQR 226
DSSP Hhh1LLLHHHHHHHLL-----hbbbbHLLL-----1LLHH

DSSP HHHHHHHHHHHHHHLL-----
Query AAQAVQRFVARIDRATKR----- 292
ident | |
Sbjct LVQNCLWTLRNLSDAATKqegmegllgtlvqllgsddinvvtcaagilsnltcnnyknkm 286
DSSP HHHHHHHHHHHHHHLL1111hhhhhhhhhh1111hhhhhhhhhhhh1111hhhhhhhhhhhh1111hhhhhhhhhhhh

DSSP -----
Query ----- 292
ident
Sbjct mvcqvvggiealvrtvlragdreditepaicalrhltsrhqeamaqnavrlhyglpvvvk 346
DSSP hhhhh11hhhhhhhhhhhh1111hhhhhhhhhhhh111111hhhhhhhhhhhh1111hhhhhhhhhhhh

DSSP -----
Query ----- 292
ident
Sbjct lhhppshwplikatvglirnlalcpanhapltreagaiprlvqllvrahqdtqregvrme 406
DSSP 1111111hhhhhhhhhhhhhhhh11hhhhhhhhhh11hhhhhhhhhhhhhhhh111111hhhh

DSSP -----
Query ----- 292
ident
Sbjct ivegctgalhilarvhnrivirgltiplfvqllyspieniqrvaagvlcelaqdkeaa 466
DSSP hhhhhhhhhhh1111hhhhhhhhhh11hhhhhhhh111111hhhhhhhhhhhhhhhh11hhhh

DSSP -----
Query ----- 292
ident
Sbjct eaieaegatapl tellhsrnegvatyaaavlfrmsed 503
DSSP hhhhh111hhhhhhhh111111hhhhhhhhhhhhhhhh1111
```

No 498: Query=mol1A Sbjct=5dedD Z-score=5.1

[back to top](#)

```
DSSP 1111111111hhhhhhhhhhhhHLLLLHHHHHHHHHHHHHHHHHHHHHLLLLLL-----LL
Query aapyspntnlrslrdrltqvaeRQGVVFGRLQRHVXIVVAQFAATLTDDTG-----AP 55
ident | |
Sbjct -----DKQWERFLVPYRQAVEELKVKLKGIRTLYEyeddhSP 37
DSSP -----LHHHHHHLHHHHHHHHHHHHHHHHHHHHHHHHHHhh1111LL
```

```
DSSP LEEEEhhHHHHhh1111LL-----1LLEEEEEEL--LHHHHHHHH
Query LLLVKggSSLElrrgIPDSR-----tSKDFATVARR--DIELIHEQL 95
ident | | | |
Sbjct IEFVT--GRVK---PVASIlekarrksiplheietmqdIAGLRIMCQFvdDIQIVKEML 91
DSSP LLEE--EEL---LHHHHhhhhhh1111hhhhhh1111LEEEEEEL11HHHHHHHH
```

```
DSSP HHHhh1111eEEEELLEEL---LLLL11LLEEEEEEEEL---1EEEEEEEEEEEL
Query ADAGetgwegfTAIFTAPEEI---AAPGXpvKPRRFTAKLSYR---gRAFATVP1EVSSV 149
ident | |
Sbjct FARK-----DFTVVDQRDYiaeHKESG-yRSYHLVLYPLQtvsGKHLVLEIQIRTL 143
DSSP HHL-----LLEEEEEEL1111LLLL-1LLEEEEEEEEL1111EEEEEEEEEEH
```

```
DSSP L1111111eEEEelhhhh111111eEEEelhhhhHHHHHHHLL1111111111hhhh
Query EagnadqfdtltsdalglvgypaavpcxtipwqiAQKLHAVTAV1eepkandrahd1v 209
ident
Sbjct A-----mnfWATIEHSLYK----- 157
DSSP H-----hhHHHHHHHLL-----
```

```
DSSP hhhhhhhhh11hhhhhhhhhhhhhhHHLL111111111111hhhhhhhhhh11111111
Query dlqllegllldadlxptrsaciaiefEARAQhpwpprvatlphwpliyagalegldhlela 269
ident
Sbjct -----pekvk1RLQRA----- 168
```

DSSP 11hhhhhhhhhhhhhhhh1111  
Query rtvdaaaqavqrfvaridratkr 292  
ident  
Sbjct ---seaasrldeemseirgvqea 188  
DSSP ---hhhhhhhhhhhh111111

No 499: Query=mol1A Sbjct=2be3A Z-score=5.1

[back to top](#)

DSSP 1111111111hhhhhhhhhhHLLLLHHHHHHHHHHHHHHHHLL--LLLL--LLLL 56  
Query aapyspntnlrslrdrltqvaERQGVVFGRLQRHVAXIVVAQFAATL--TDDT--GAPL  
ident |  
Sbjct -----XTLEWEEFLDPYIQAVGELKIKLRGIrkQYRKqnKHSP 38  
DSSP -----LHHHHHHHHHHHHHHHHHHHHHHHHHHhHHHH11LLL

DSSP -EEEEhhHHHHhh11LLL--LLEEEEEELL--LHHHHHH 94  
Query -LLVKggSSElrrgIPDSR-----tSKDFATVARR--DIELTHEQ  
ident | | |  
Sbjct iEFVT--GRVK---PIESIkexarrgi tyatlehdldqIAGLRVXVQFvdDVKEVVDI 92  
DSSP eEEEE--EEL---LHHHHhhhhhh111111hhhh11LEEEEEELLhhHHHHHHHH

DSSP HHHHHhh1111eEEEELLEEL--LLLL11LLEEEEEEEEL---1EEEEEEEEEEEL 149  
Query LADAGetgwegfTAIFTAPEEI--AAPGXpvKPRRFTAKLSYR---gRAFATVPIEVSSV  
ident | |  
Sbjct LHKRQ-----DXRIQERDYitHRKAsgyRSYHVVEYTVdtingAKTILAEIQIRTL 145  
DSSP HLLL-----LEEEEEEEEL11LLL11LLEEEEEEEEL111LEEEEEEEEEEH

DSSP L1111111eEEEElhhhh111111eEEEElhhhhHHHHHHHLL1111111111hhhh 209  
Query EagnadqfdtltsdalglvgypaavavpcxtipwqiAQKLHAVTAvleepkandrahdlv  
ident  
Sbjct A-----xnfWATIEHSLN----- 158  
DSSP H-----hhhHHHHHHHH-----

DSSP hhhhhhh11hhhhhhhhhhhhhhhh11111111LLELLHhhhhhhhh11111111 269  
Query dlqllegllldadlxptrsaciaifearaqhpwpprVATLPHWplyagalegldhlela  
ident  
Sbjct -----ykyqGDFPEI-----kkrleitaria 180  
DSSP -----hh11LLLHHH-----hhhhhhhhhh

DSSP 11hhhhhhhhhhhhhhhh1111  
Query rtvdaaaqavqrfvaridratkr 292  
ident  
Sbjct hqldeexgeirddiqaqalfdp 203  
DSSP hhhhhhh11hhhhhhhhhh111

No 500: Query=mol1A Sbjct=5dedF Z-score=5.1

[back to top](#)

DSSP 1111111111hhhhhhhhhhHLLLLHHHHHHHHHHHHHHHHLL--LLLL--LL 55  
Query aapyspntnlrslrdrltqvaeRQGVVFGRLQRHVAXIVVAQFAATLT--DDTG---AP  
ident |  
Sbjct -----DKQWERFLVPYRQAVEELKVKLGIRt1YEYEdhdSP 37  
DSSP -----LHHHHHHHHHHHHHHHHHHHHHHHHHh1LLL111LL

DSSP LEEEEhhHHHHhh11LLL--LLEEEEEELL--LHHHHHHHH 95  
Query LLLVKggSSElrrgIPDSR-----tSKDFATVARR--DIELTHEQL  
ident | | | |  
Sbjct IEFVT--GRVK---PVASIEkarrksiplheietmqdIAGLRIMCQFvdDIQIVKEML 91  
DSSP LLEE--EEL---LHHHHhhhhhh1111hhhhhh11LEEEEEELLhhHHHHHHHH

DSSP HHHHHhh1111eEEEELLEEL--LLLL11LLEEEEEEEEL---1EEEEEEEEEEEL 149  
Query ADAGetgwegfTAIFTAPEEI--AAPGXpvKPRRFTAKLSYR---gRAFATVPIEVSSV



```

DSSP  HLLL-----LLEEEEEEL1111LLLL-1LLEEEEEEEELL1111LLEEEEEEEEEEH

DSSP  L1111111eeeeelhhhh111111eeeeelhhhhhHHHHHHHHL1111111111hhhh
Query  EagnadqfdtltsdalglvgypaavavpcxtipwqiAQKLHAVTAvleepkandrahdLv 209
ident
Sbjct  A-----mnfWATIEHSLN----- 156
DSSP  H-----hhhHHHHHHHHL-----

DSSP  hhhhhhhh1hhhhhhhhhhhhhhhhhh11111111LLLL1hhhhhhhhh11111111
Query  dlqlleglldadlxptrsaciaifearaqhpwpprVATLphwpliyagalegl dhlela 269
ident
Sbjct  -----yKSGN-----ipekvklr 169
DSSP  -----1LLLL-----11111111

DSSP  1hhhhhhhhhhhhhhhhhh1111
Query  rtvdaaaqavqrfvaridratkr 292
ident
Sbjct  lqraseaasrldeemseirgeva 192
DSSP  1hhhhhhhhhhhhhhhhhh1111

```

No 501: Query=mol1A Sbjct=4atbA Z-score=5.1

[back to top](#)

```

DSSP  -----111111111hhhhhhhhhhhh1LLLHHHHHHHHHHHHHHHHHHH
Query  -----aapyspntnlrslrdrltqvaerqGVVFGRLQRHVAXIVVAQFAAT 47
ident
Sbjct  shipdfdfylcemafprvkpapedtsfseallkrnqdlaPNSAEQASILSLVTKINVIDN 60
DSSP  111111hhhh1hhhh111111111hhhhhhhhhhhh1LLLHHHHHHHHHHHHHHHHHH

```

```

DSSP  LL--LLLL-1LLEEEHHhhhhhh1111LLLL-----1LLEEEEL--LHHHHHHHHHH
Query  LT--DDTG-aPLLLVKGsslelrrgipDSRT----sKDFATVAR--RDIELIHEQLAD 97
ident  |       |         |           |           |
Sbjct  LIvaPGTFevQIEEVQRV-----gsykKGTmttghnvADLVVILki1PTLEAVAALGNK 114
DSSP  Hhh1LLL11LEEEEEEE-----hhhhLLL1111eEEEEEEEL11LLHHHHHHHHHH

```

```

DSSP  HHHH-LLLL--eeEEELLe111111111EEEEEEee1leEEEEEEEEELLLL11
Query  AGET-GWEG--ftAIFTAPEeiaapgxpvkPRRFTAKLsyrgrAFATVPIEVSSVEAGNa 154
ident  |           |         |           |           |
Sbjct  VVES1RAQDpsevLTMLTNE-----TGFEISS----SDATVKILITTVPNN-- 156
DSSP  HHHhhHHHL1111LEEEEL-----LEEEEL-----LLEEEEEEEELHHH--

```

```

DSSP  111eeeeelhhhh111111eeeeelhhhhhHHHHHHH11111111LLLLhhhhhhhhh
Query  dqfdtltsdalglvgypaavavpcxtipwqiAQKLHAVtavleepkaNDRAhdldvlql 214
ident
Sbjct  -----lrkldepelhdikvlsalaaIRHARWF-----eENAS----- 189
DSSP  -----h111111111hhhhhhhhhhHHHHHH-----hHHL-----

```

```

DSSP  hhh1hhhhhhhhhhhhhhhh11111111111hhHHHHHHHL-LLLL-----
Query  eglldadlxptrsaciaifearaqhpwpprvatlphwpLIYAGALEGL-DHLE----- 267
ident  |           |         |
Sbjct  -----QSTVKVLIRL1KDLRirfpgf 210
DSSP  -----LHHHHHHHHHHHHHHhhhhh

```

```

DSSP  -----111LHHH-----hhhhHHHH-----H
Query  -----larTVDA-----aaqavQRFV-----A 284
ident  |
Sbjct  epltpwildllghyAVMNnptrqplalnvaYrrclqilaagflpgsvGITDpcesgnfR 270
DSSP  1111hhhhhhhhHHHL1111111hhhhhhhhhhhh11111111LLLL11111111

```

```

DSSP  HHHHLLL-----
Query  RIDRATKR----- 292
ident  |
Sbjct  VHTVMTLEqddmcytaqtlvrilshggfrkilqeggdasylaseistwdgvivtpseka 330
DSSP  HHHHLHHhhhhhhhhhhhhhh11hhhh111111hhhh11leeeleee111111

```





Sbjct lsKNIVAVGLSRRE-----EKMLNDVDLLIIVpekk1lhVLPNIR---IKGL----- 74  
DSSP 11LLEEEELHHHHL-----LLEELLEEEEEe11hhhh1LLEEE---ELL-----

DSSP 1eeeEELL1EELL11111LEEEEEEEEEelleEELLLL11111eellh  
Query gftaIFTApEEIAApgrpKPRRFTAKLSyrgaFATVPIEVSSVEAGNadqfdtlttsda 164  
ident | | | | | | | | | | | | | | | | | | | | | | | | | | | | | | | | | | | | | | |

Sbjct ---SFSV-KVCGE---RKCFLFIEWE---KKTQQLDLFTALAE----- 108  
DSSP ---EEEE-EEELL-----LEEEEEEEEL-----LEEEEEEEEEHHH-----

DSSP hhh11111leeee1hHHHHhhhhHHLL1111111111hhhhhhhhhh11hhHHH  
Query lglvgpvaavavpctxtiPWQIaqklhAVTAVlepkandrahdvldqlleg111daDLX 224  
ident |

Sbjct -----kpYAlFhftgpVSYLI-riraalkknyklnqyglfknqtlvPLK 152  
DSSP -----hhHHHHhh11HHHH-hhhhhhh1leeee1leeeleeeLLL

DSSP HhhHHHHhhhh1111L111111hhhhhhhh1111111111hhhhhhhhhh  
Query PtrSACIaifearaqhpPPRvatlphwpliYagaleldhlelartvdaaqaavqrfva 284  
ident

Sbjct I--TEK-----elikeLGFT----- 166  
DSSP L--LLHH-----hhhhHLLL-----

DSSP hhhh1111  
Query ridratkr 292  
ident  
Sbjct yripkkrl 174  
DSSP 111hhhl1

No 505: Query=mol1A Sbjct=5cwrA Z-score=5.1

[back to top](#)

DSSP -----  
Query ----- 0  
ident  
Sbjct tnhn1hiteklevlakaysvqgdkwralgyakainalksfhkpvtsyqeacsipgigkrm 60  
DSSP 1111hhhhhhhhhhhhhh11hhhhhhhhhhhh1111111hhhh11111hhh

DSSP -----11111111hhhhh  
Query -----aapyspptnlrslr 15  
ident  
Sbjct aeikiielesghlrkldhisesvpvlelfsniwgagtktaqmwyqqgfrslelirdsasl 120  
DSSP hhhhhhhhh111hhhh1111hhhhhhhh111111hhhhhhhh1111hhhhhh111

DSSP hhhhhhh11111HHHHHHHHHHHHHHHLL-LLLLLLLLLEEEHHHHHHhh1111  
Query drltqaerqgvfGRlQRHVAXIVVAQFAAT-LTDDTGAPLLLKGGSSLELrrgipds 74  
ident | | | | | | | | | | | | | | | | | | | | | | | | | | | | | | | | | | | | | | |  
Sbjct ttqqaiglkhsydfLERMPREATEIEQTVQkaAQAFNSGLLCVACGSYRRGK----- 173  
DSSP 1hhhhhhhh11hhhhHLLLEHHHHHHHHHHHHhHLLLLLEEEELHHHHLLL-----

DSSP 1LLEEEEEEL-----1LHHHHHHHHHHHHhh111leeEELLEEL11111LLE  
Query rTSKDFATVAR-----rDIELIHEQLADAGetgwegftAIFTAPEEIAapgrpVKPR 126  
ident | | | | | | | | | | | | | | | | | | | | | | | | | | | | | | | | | | | | | | |  
Sbjct aTCGDVDVAIThpdgrshrgIFSRLDLSLRQEG-----FLTDDLVSQ--eengQQKY 223  
DSSP 1EELLEEEEE1111111HHHHHHHHHHHLL-----LEEEEEEL--1111LEE

DSSP EEEEEEE1EEEEEEEEEEEL-LLLL1111eellhhhh11111eellhHHHH  
Query RFTAKLSYrgRAFATVPIEVSSV-EAGNadqfdtlttsdalglvgpvaavavpctxtiPWQI 185  
ident | | | | | | | | | | | | | | | | | | | | | | | | | | | | | | | | | | | | | | |  
Sbjct LGVCRLLP--PGRRRRLDIIVVpYSEF-----aCALL 254  
DSSP EEEELLLL--LLLLLEEEEEEL1HHHH-----hHHHH

DSSP hhhhhhh1111111111HHHHHHhhhh11hhhhhhhhHHH-----  
Query aqklhavtavlepkandrahdVLDLQ1leg111dadlXptrsACIA----- 232  
ident  
Sbjct -----yftgSAHFNRS--mralktkgmIsEHALStavrnrthgckvg 296  
DSSP -----hhhlLHHHHH--hhhhhh1leee1LLEEelleell111lee

DSSP ---hHHHH--11111LLLLL111hhhhhhhh1111111111hhhhhhhhhhhhhh  
Query ---iFEAR--aqhpwPPRVATlphwplyagalegldhlelartvdaaaqavqrfvarid 287  
ident  
Sbjct pgrvLPTPtekdvfrLLGLPY-----rep 320  
DSSP 111eELL1hhhhhhHLLLL-----1lh

DSSP h1111  
Query ratkr 292  
ident  
Sbjct aerdw 325  
DSSP hh111

No 506: Query=mol1A Sbjct=3hx0K Z-score=5.1

[back to top](#)

DSSP -----  
Query ----- 0  
ident  
Sbjct atnhnlhiteklevlakaysvqgdkwraagyakainalksfhkpvtsyqeacsipgigkr 60  
DSSP 11111hhhhhhhhhhhhhhhh11hhhhhhhhhhhhhh1111111hhhh111111hh

DSSP -----111111111hhhh  
Query -----aapyspntlrs1 14  
ident  
Sbjct maekieielesghlrkldhisesvpvlelfsniwgagtktaqmwyqqgfrslelrsqas 120  
DSSP hhhhhhhhh11111hhhh1111hhhhhhhh111111hhhhhhhh111111hhhh1111

DSSP hhhhhhhhh1111hHHHHHHHHHHHHHHHLL-LLLLLLLEEEHHHHHHhh1111  
Query rdr1tqvaerqgvfGRLQRHVAXIVVAQFAATL-TDDTGAPLLLVKGGSSLELrrgipd 73  
ident  
Sbjct lttqqaiglkhydfLERMPREEATEIEQTVQKAaQAFNSGLLCVACGSYRRGK----- 174  
DSSP 1hhhhhhhh1hhhhHLEEHHHHHHHHHHHHHHLLLLLLLEEEHHHHLLL-----

DSSP 11111LEEEEL-----1LHHHHHHHHHHHHhh1111eeEEELLE-ELL111111  
Query srTSKDFATVAR-----rDIELIHEQLADAGetgwegftAIFTAPE-EIAApgXPVK 124  
ident  
Sbjct -aTCGDVDVLIThpdgrshrgIFSRLLDSLRLQEG-----FLTDDLvsQEEN--GQQQ 223  
DSSP -1EEEEEEEE11111111LHHHHHHHHHHLL-----LEEEEEEeEEEE--LLEE

DSSP LEEEEEEEE11EEEEEEEEEEEL-LLLL1111eeee1hhhh11111eeee1hHH  
Query PRRFTAKLSYrgRAFATVPIEVSSV-EAGNadqfdt1tsdalglvgvpaavpextiPW 183  
ident  
Sbjct KYLGVCRLPG--PGRRHRLDIIIVpYSEF-----aCA 254  
DSSP EEEEEELLLL--LLLLLEEEEEEEL1HHHH-----hHH

DSSP HHhhhhhhhh1111111111HHHHHHH-----hbbhh1  
Query QIaqklhavltaleepkandraHDLVLDLQ-----lleg11 218  
ident  
Sbjct LL-----yftgSAAFNASmralaktkgmslsehalstavrntghakvg 298  
DSSP HH-----hh1LHHHHHHHHhhhh111ee1111ee1111111111

DSSP 1hHHHHhhHHHHhhhhhh1111111111hhhhhhhh1111111111hhhhhh  
Query ldADLXptRSACIaifearaqhpWPPRVAatlphwplyagalegldhlelartvdaaaqa 278  
ident  
Sbjct pgrVLP--TPTEK-----dvfRLLGLP----- 318  
DSSP 11LEEL--LLLHH-----hhHHHLLL-----

DSSP hhhhhhhhh1111  
Query vqrfvaridratkr 292  
ident  
Sbjct -----yrepardw 327  
DSSP -----11hhhh111

[back to top](#)

DSSP -----  
Query ----- 0  
ident  
Sbjct tnhnlhiteklevlakaysvqgdkwralgyakainalksfhkpvtscyqacsipgigkrm 60  
DSSP 1111hhhhhhhhhhhhhhhhhh1111hhhhhhhhhhhhhhhhhh11111111hhhhhh1111hhh

DSSP -----1111111111hhhhh  
Query -----aapysspptnlrslr 15  
ident  
Sbjct aekiieilesghlrkl dhisesvpvlelfsniwgagtktaqmwyqgfrsle dirsqasl 120  
DSSP hhhhhhhhh11111hhhh11111hhhhhhhhhh11111hhhhhhhhhh11111hhhhhhhh1111

DSSP hhhhhhhhh1111hHHHHHHHHHHHHHHHLL-LLLLLLLEEEHHHHHHHHhh1111  
Query drltqvaerqgvfGRLQRHVAXIVVAQFAATL-TDDTGAPLLLKVGGSSLELrrgipds 74  
ident  
Sbjct ttqqaiglkhsdfLERMPREEATEIEQTVQKAaQAFNSGLLCVACGSYRRGK----- 173  
DSSP 1hhhhhhhh1hhhhHLEEHHHHHHHHHHHHHHHHHLLLLLEEEELHHHHLLL-----

DSSP 1LLLLEEEEEL-----1LHHHHHHHHHHHHhh1111eeEELL-EELLLL1LLLL  
Query rTSKDFATVAR-----rDIELIHEQLADAGetgwefgftaIFTAP-EEIAAPGxPVKP 125  
ident | | |  
Sbjct aTCGDVDVLIThpdgrshrgIFSRLLDSLRLQEG-----FLTDDIVSQEENG-QQQK 223  
DSSP 1EELLEEEEE11111111HHHHHHHHHHHLL-----LEEEeEEEEEL-LEEE

DSSP EEEEEEEEE11EEEEEEEEEEEL-LLLL1111eeeee1hhhh11111eeeee1hHHH  
Query RRFTAKLSYrgRAFATVPIEVSSV-EAGNadqfdtltsdalg1vgvpaavapcxtiPWQ 184  
ident | |  
Sbjct YLGVCRPLPG--PGRRHRLDIIVpYSEF-----aCAL 254  
DSSP EEEEELLL--LLLLEEEEEEEL1HHHH-----hHHH

DSSP Hhhhhhhhh1111111111HHHHHHH-----hhhh1lhh  
Query Iaqlh avtavleepkandraHDLVDLQ-----lleg111da 221  
ident  
Sbjct L-----yftgSAHFNRSmralaktkgmslsehalstavrnrthgckvvp 298  
DSSP H-----hhh1LHHHHHHHHHHHHhh1leeel11eeel11111111111

DSSP hhhhhHHHHHHhhhhhh1111LLLL11111hhhhhhhhhh1111111111hhhhhhhhhh  
Query dlxptRSACIaifearaqhpWPPRVatlphwplyagalegl dhlelartvdaaaqavqr 281  
ident  
Sbjct grv1pTPTEK-----dvfRLLGL----- 316  
DSSP 1lee1LLLHH-----hhhHHLLL-----

DSSP hhhhhhh1111  
Query fvaridrater 292  
ident  
Sbjct -pyrepaer dw 326  
DSSP -1111hh111

No 508: Query= mol1A Sbjct=3er8D Z-score=5.1

[back to top](#)

DSSP -----111111LLLL--  
Query -----aapyssPPTN-- 10  
ident  
Sbjct nitlkiietylgrvpvsvneyhmlksqarniqkivfnkdifvslvkknkrffsDVNTsa 60  
DSSP 1hhhhhhhhhh11111hhhhhhhhhhhhhhhhhh11111hhhhhhhhhhhh111111111111

DSSP -----hhhhhhhhhhhh  
Query -----lrslrdrltqvae 23  
ident  
Sbjct seikdrilsyfskqtqytynigklftiieqlsvlvttytdilgvltinvtsmelardmln 120  
DSSP 1hhhhhhhhhh1lhhhh111hhhhhhhhhhhhhhhhhhhhhhhh1111hhhhhhhhhhhh

```

Query  r qg v v f g r l q R H V A X I V V A Q F A A T L t d d t g a P L L L V K G S S L E L R R G i p D S R T s K D F A T V    83
ident
Sbjct  s m n v a v v s s l V K N V N K L M E E Y L R R H ----- n K S C I C Y G S Y S L Y L I N P -- N I R Y - G D I D I L    172
DSSP  h h 1 1 1 1 1 1 1 h H H H H H H H H H H H H L ----- 1 L L E E E L H H H H L L L L -- L L L L - L L E E E

DSSP  E L L 1 H H H H H H H H H H H H L 1 1 1 e e e E E L L E E L L 1 1 1 1 1 L L E E E E E E e e e 1 1 e e e E E E E
Query  A R R d I E L I H E Q L A D A G E T G w e g f t a I F T A p E E I A A p g x p v K P R R F T A K 1 s y r g r a f a T V P    143
ident
Sbjct  Q T N - S R T F L I D L A F L I K F I -- t g n n I I L S - K I P Y L ----- R N Y M V I K D ----- e n d N H I I    218
DSSP  E L L - H H H H H H H H H H H H H H -- h 1 1 1 L E E E - E L L L L ----- L L E E E E E L ----- 1 1 1 L E E E

DSSP  E e E E E L 1 1 L L L L -- L L E E E E e l h h h h 1 1 1 1 1 1 e E E E E L L H H H H H H H H H H L L L 1 1 1 1 L
Query  I e V S S V e a G N A D -- Q F D T L T s d a l g l v g v p a a v A V P C X T I P W Q I A Q K L H A V T A V L e e p k A    201
ident
Sbjct  D - S F N I r q D T M N v v P K I F I D ----- N I Y I V D P T F Q L L N M I K M F S Q I D --- r L    261
DSSP  E - E E E L 1 h H H H H h 1 L E E E L L ----- L L E E E L H H H H H H H H L L L L L H H -- h H

DSSP  L L L ---- L H H H H H H H H H H H L -- L H H H -----
Query  N D R ---- A H D L V D L Q L L E G L L -- L D A D -----
ident
Sbjct  E D L s k d p E K F N A R M A T M L E Y V r y T H G I v f d g k r n n m p m k c i i e n n r i v t v t k d y f s f k    321
DSSP  H H H h 1 1 1 L H H H H H H H H H H H H h H L L L 1 1 1 1 1 1 1 1 1 1 1 1 1 1 1 1 1 1 e e e 1 1 1 1 e e e e e 1 1 1 1 1 1 1

DSSP  ----- h h h h h h h h h h h H L L L L ----- 1 L
Query  ----- l x p t r s a c i a i f e A R A Q H P ----- w P    243
ident
Sbjct  k c l v y l d e n v l s s d i l d n a d t s c d f e s v t n s v y l i h d n i m y t Y F S N T I 1 1 s d g k v h e I    381
DSSP  e e e e 1 1 h h h h h h h h h h 1 1 1 1 1 1 e e 1 h h h 1 1 1 e e e e 1 e e e e E L L L L e e e e 1 e e l h H

DSSP  L L L 1 1 1 1 1 h h h h h h h h h h 1 1 1 1 1 1 1 1 1 h h h h h h h h h h H H H H H ----- h H L L L -----
Query  P R V a t l p h w p l y a g a l e g l d h l e l a r t v d a a a q a v q r F V A R I ----- d R A T K -----    291
ident
Sbjct  S A R ----- g l C A H I L l y q m l t s g E Y K Q c l s d l    408
DSSP  H H H ----- h h H H H H H h h h h h 1 1 L L H h h h h h

DSSP  ----- l
Query  ----- r    292
ident
Sbjct  I n s m m n r d k i p i y s h t e r d k k p g r h g f i n i e k d i i v f    445
DSSP  h h h 1 1 1 1 1 1 1 1 1 e e l 1 1 1 1 1 1 1 1 1 e e e e 1 1 1 e e e l

```

No 509: Query=mol1A Sbjct=3hx0P Z-score=5.1

[back to top](#)

```

DSSP  -----
Query  -----    0
ident
Sbjct  a t n h n l h i t e k l e v l a k a y s v g d k w r a a g y a k a i n a l k s f h k p v t s y q e a c s i p g i g k r    60
DSSP  1 1 1 1 1 h h h h h h h h h h h h h h h h 1 1 1 h h h h h h h h h h h h h h h 1 1 1 1 1 1 1 h h h h h h 1 1 1 1 h h

DSSP  ----- 1 1 1 1 1 1 1 1 1 1 h h h h
Query  ----- a a p y s s p t n l r s l    14
ident
Sbjct  m a e k i i e i l e s g h l r k l d h i s e s v p l e l f s n i w g a g t k t a q m w y q q g f r s l e d i r s q a s    120
DSSP  h h h h h h h h h h 1 1 1 1 h h h h 1 1 1 1 h h h h h h h h 1 1 1 1 1 h h h h h h h h h h 1 1 1 1 h h h h h h h h 1 1

DSSP  h h h h h h h h h h 1 1 1 1 h H H H H H H H H H H H H H H L L - L L L L L L L E E E E H H H H H H H h 1 1 1 1
Query  r d r l t q v a e r q g v v f G R L Q R H V A X I V V A Q F A A T L - T D D T G A P L L L V K G S S L E L R r g i p d    73
ident
Sbjct  I t t q q a i g l k h y s d f L E R M P R E E A T E I E Q T V Q K A a Q A F N S G L L C V A C G S Y R R G K -----    174
DSSP  1 1 h h h h h h h h l h h h h L L E E H H H H H H H H H H H H H H L L L L L L L E E E E L H H H H L L L -----

DSSP  1 1 L L L L E E E E E L ----- 1 L H H H H H H H H H H H h 1 1 1 1 e e E E E L L E - E L L L 1 1 L L L L
Query  s r T S K D F A T V A R ----- r D I E L I H E Q L A D A G e t g w e g f t A I F T A P E - E I A A p g X P V K    124
ident

```







No 512: Query=mol1A Sbjct=4k4gM Z-score=5.1

[back to top](#)

```
DSSP -----
Query ----- 0
ident
Sbjct atnlnlhiteklevlakaysvqgdkwralgyakainalksfhkpvtisyqeacsipgigkr 60
DSSP 11111hhhhhhhhhhhhhhhhhhhh11hhhhhhhhhhhhhhhhhh111111hhhhhh11111hh

DSSP -----1111111111hhhh
Query -----aapyspntnrlsl 14
ident
Sbjct maekiieilesghlrkldhisesvpvlelfnwiwgagtktaqmwyyqgfrsleldirsqas 120
DSSP hhhhhhhhhhh111hhhh11111hhhhhhhh111111hhhhhhhh11111hhhhhhhh11111hhhhhh11

DSSP hhhhhhhhh1111hHHHHHHHHHHHHHHHLL-LLLLLLLLEEEHHHHHHHHhh1111
Query rdr1tqvaerqgvvfGRLQRHVAXIVVAQFAATL-TDDTGAPLLLKGGSSLELrrgipd 73
ident
Sbjct lttqqaiglkhydfLERMPREEATEIEQTVQKAaQAFNSGLLCVACGSYRRGK----- 174
DSSP 11hhhhhhhh11hhhhLLEEHHHHHHHHHHHHHHLLLLLLLEEEELHHHHLLL-----

DSSP 11LLLLEEEEL-----1LHHHHHHHHHHHHhh1111eeEEELLE-ELLL11LLL
Query srTSKDFATVAR-----rDIELIHEQLADAGetgwegftAIFTAPE-EIAApGXPVK 124
ident
Sbjct -aTCGDVDVLIThpdgrshrgIFSRLLDLSLRQEG-----FLTDDLvsQEEN--GQQQ 223
DSSP -1EELLEEEEEE1111111111HHHHHHHHHHHLL-----LEEEEEEeEEEE--LLEE

DSSP LEEEEEEEEE11EEEEEEEEEEEL-LLLL1111eeeee1hhhh111111eeeee1hhHH
Query PRRFTAKLSYrgRAFATVPIEVSSV-EAGNadqfdt1tsdalglvgvpaavavpcxtiPW 183
ident
Sbjct KYLGVCRLPG--PGRRRRLDIIVpYSEF-----aCA 254
DSSP EEEEEELLLL--LLLLLEEEEEEEL1HHHH-----hHH

DSSP HHHhhhhhh111111111111HHHHHHHH-----hhhh11hhhh
Query QIaqklhavtavlepkandraHDLVDLQL-----leg11ldad1 223
ident
Sbjct LL-----yftgSAHFNRSMralaktkgmslsehalstavrhgckvgpg 298
DSSP HH-----hh1LHHHHHHHHhhhh11eeel111eeel111111111111

DSSP hhhHHHHhhhhhh111111111111hhhhhhhh1111111111hhhhhhhhhhhh
Query xptRSACiaifearaqhpWPPRVatlphwpliyagaleglhdh1ELARtvdaaaqavqrfv 283
ident
Sbjct rv1PTPT-----ekdvfRLGL-----pyrepaerdWLEH----- 328
DSSP leeLLL-----hhhhHHLLL-----1111hhhh111111

DSSP hhhhh1111
Query aridratkr 292
ident
Sbjct ----- 328
DSSP -----
```

No 513: Query=mol1A Sbjct=4k4hM Z-score=5.1

[back to top](#)

```
DSSP -----
Query ----- 0
ident
Sbjct atnlnlhiteklevlakaysvqgdkwralgyakainalksfhkpvtisyqeacsipgigkr 60
DSSP 11111hhhhhhhhhhhhhhhhhhhh11hhhhhhhhhhhhhhhhhh111111hhhhhh11111hh

DSSP -----1111111111hhhh
Query -----aapyspntnrlsl 14
```

DSSP hhhhhhhhhhh1111hhhh11111hhhhhhhh11111hhhhhhhh11111hhhhhhhh11

DSSP hhhhhhhhh1111hHHHHHHHHHHHHHHHLL-LLLLLLLEEEHHHHHHhh1111  
Query rdrltqvaerqgvfGRLQRHVAXIVVAQFAATL-TDDTGAPLLLKGGSSLELrrgipd 73  
ident | | | | | | | | |  
Sbjct lttqqaiglkhysdfLERMPREEATEIEQTVQKAAQAFNSGLLCVACGSYRRGK----- 174  
DSSP 11hhhhhhhh1hhhhHLLLEHHHHHHHHHHHHHLLLLLLLEEEELHHHHLLL-----

DSSP 11LLLEEEEEEL-----1LHHHHHHHHHHHHhh1111eeEELL--EELL11LLL  
Query srTSKDFATVAR-----rDIELIHEQLADAGetgwegftaIFTAP--EEIAApgXPV 123  
ident | | | | | | | | |  
Sbjct -aTCGDVDVLITHpdgrshrgIFSRLDSLREQE-----FLTDD1vSQUEEN--GQQ 222  
DSSP -1EELLEEEEEEL11111111HHHHHHHHHHHLL-----LEEEeeEEEE--LLE

DSSP LEEEEEEEEEL1EEEEEEEEEEEL-LLL11111eeee1hhhh11111eeee1hhH  
Query KPRRF TAKLSYrgRAFATVPIEVSSV-EAGNadqfdt1tsdalglv gvaavavpctiP 182  
ident | | | | | | | | |  
Sbjct QKYLGVCR LPG--PGRRHRLDIIVVpYSEF-----aC 253  
DSSP EEEEEEEEEEL--LLLLEEEEEEL1HHHH-----hH

DSSP HHHhhhhhhhh1111111111HHHHHHH-----hhhh11hH  
Query WQIaqklhavtavlepkandraHDLVDLQ-----lleg111dA 221  
ident | | | | | | | | |  
Sbjct ALL-----yftgSAHFNRSmralaktgmslsehalstavvrckvpgR 297  
DSSP HHH-----hhh1LHHHHHHhhhhhh1111111111

DSSP HHHhhHHHHHHhhhhhh1111LLLLL11111hhhhhhhh1111111111hhhhhhhhhh  
Query DLXptRSACIaifearaqhpWPPRVat1phwplyagalegl dhlelartvdaaaqavqr 281  
ident | | | | | | | | |  
Sbjct VLP--TPTEK-----dvfRLLGL-----p 314  
DSSP EEL--LLLH-----hhhHHLL-----1

DSSP hhhhhhh1111  
Query fvaridrattr 292  
ident | | | | | | | | |  
Sbjct yrepaerdwle 325  
DSSP 111hhhh1111

No 514: Query=mollA Sbjct=5iioE Z-score=5.1

[back to top](#)

DSSP -----  
Query ----- 0  
ident | | | | | | | | |  
Sbjct nhlhiteklevlakaysvqgdkwralgyakainalksfhkpvtsyqeacsipgigkrma 60  
DSSP 111hhhhhhhhhhhhhh111hhhhhhhhhhhhhh11111hhhhhh11111hhhh

DSSP -----1111111111hhhhhh  
Query -----aapyspptnlrsld 16  
ident | | | | | | | | |  
Sbjct ekiieilesghlrkl dhisesvpvl elfsniwgagtktqmwyqqgfrsle dirsqs1t 120  
DSSP hhhhhhhhh111hhhh11111hhhhhhhh11111hhhhhhhh11111hhhhhhhh1111

DSSP hhhhhhh1111hHHHHHHHHHHHHHHHLL-LLLLLLLEEEHHHHHHhh11111  
Query rltqvaerqgvfGRLQRHVAXIVVAQFAATL-TDDTGAPLLLKGGSSLELrrgipdsr 75  
ident | | | | | | | | |  
Sbjct tqqaiglkhysdfLERMPREEATEIEQTVQKAAQAFNSGLLCVACGSYRRGK-----a 173  
DSSP hhhhhhh1hhhhLLEHHHHHHHHHHHHHHHLLLLLLLEEEELHHHHLLL-----1

DSSP LLLLEEEEEEL-----1LHHHHHHHHHHHHhh1111eeEELL--EELL11LLL  
Query TSKDFATVAR-----rDIELIHEQLADAGetgwegftaIFTAP--EEIAApgXPVKP 125  
ident | | | | | | | | |  
Sbjct TCGDVDVLITHpdgrshrgIFSRLDSLREQE-----FLTDD1vSQUEEN--GQQQK 222  
DSSP EELLEEEEEEL11111111HHHHHHHHHHHLL-----LEEEeeEEEE--LLEE

Query RRFTAKLSYrgRAFATVPIEVSSV-EAGNadqfdtlttsdalglvgvpaavavpcxtiPWQ 184  
ident | |  
Sbjct YLGVCRPLPG--PGRRRRRLDIIVVpYSEF-----aCAL 253  
DSSP EEEEELLL--LLLLLEEEEEEL1HHHH-----hHHH

DSSP Hhhhhhhhh1111111111HHHHHHH-----hhhh11hh  
Query Iaqlh'avtavleepkandraHDLVDLQ-----lleg111da 221  
ident | |  
Sbjct L-----yftgSAHFNRSmralaktkgmslsehalstavrnrthgckvgp 297  
DSSP H-----hhl1LHHHHHHhhhhhh11lee111lee111111111111

DSSP hhhhhHHHHhhhhhh1111LLLLL11111hhhhhhhh1111111111hhhhhhhhhh  
Query dlxptRSACIaifearaqhpWPPRVat1phwpliyagalegldhlelartvdaaaqavqr 281  
ident | |  
Sbjct grvlpTPTEK-----dvfRLLGL----- 315  
DSSP 1lee1LLLHH-----hhhHHHL-----

DSSP hhhhhhh1111  
Query fvaridratkr 292  
ident | |  
Sbjct -pyrepaerdw 325  
DSSP -1111hh111

No 515: Query=mol1A Sbjct=4k4hE Z-score=5.1

[back to top](#)

DSSP -----  
Query ----- 0  
ident | |  
Sbjct atnhnlhiteklevlakaysvqgdkwralgyakainalksfhkpvtsyqaeacsipgigkr 60  
DSSP 11111hhhhhhhhhhhhhhhh111hhhhhhhhhhhhhhhh111111hhhhhh111111hh

DSSP -----111111111hhhh  
Query -----aapyspsptnlrsl 14  
ident | |  
Sbjct maekiieilesghlrkl dhisesvpvlelfsniwgagtktaqmwyqqgfrslelirsqas 120  
DSSP hhhhhhhhhhh111hhhhhh1111hhhhhhhh111111hhhhhhhh1111hhhhhhhh11

DSSP hhhhhhhhh1111hHHHHHHHHHHHHHHHLL--LLLLLLLEEEHHHHHHHHhh1111  
Query rdr1tqvaerqgvvfGRLQRHVAXIVVAQFAATL--TDDTGAPLLLKGGSSLELrrgipd 73  
ident | | | |  
Sbjct lttqqaiglkhydsfLERMPREEATEIEQTVQKAaQAFNSGLLCVACGSYRRGK----- 174  
DSSP 11hhhhhhhh1hhhhHLEEHHHHHHHHHHHHHHHLLLLLLLEEEELHHHHLLL-----

DSSP 11LLLLLEEEEL-----1LHHHHHHHHHHHHhh1111eeEEELLEEL1111LLLL  
Query srTSKDFATVAR-----rDIELIHEQLADAGetgwegftAIFTAPEEJaagXPVKP 125  
ident | | | | |  
Sbjct -aTCGDVDVLIthpdgrshrgIFSRLLDSLREQE-----FLTDDLVSQ---eGQQQK 222  
DSSP -1EELLEEEEEE111111111LHHHHHHHHHHLL-----LEEEEEEE---1LLEE

DSSP EEEEEEEEE1EEEEEEEEEEEL--LLL1111eeee1hhhh11111eeee1hHHH  
Query RRFTAKLSYrgRAFATVPIEVSSV-EAGNadqfdtlttsdalglvgvpaavavpcxtiPWQ 184  
ident | |  
Sbjct YLGVCRPLPG--PGRRRRRLDIIVVpYSEF-----aCAL 253  
DSSP EEEEELLL--LLLLLEEEEEEL1HHHH-----hHHH

DSSP Hhhhhhhhh1111111111HHHHHHH-----hhhh11  
Query Iaqlh'avtavleepkandraHDLVDLQ-----lleg111 219  
ident | |  
Sbjct L-----yftgSAHFNRSmralaktkgmslsehalstavrnrthgckvgp 297  
DSSP H-----hhl1LHHHHHHhhhhhh11lee111lee111111111111

DSSP hHHHHhhHHHHhhhhhh1111LLLLL11111hhhhhhhh1111111111hhhhhhhh  
Query dADLXptRSACIaifearaqhpWPPRVat1phwpliyagalegldhlelartvdaaaqav 279  
ident | |

DSSP hhhhhhhhh1111  
Query qrfvaridratkr 292  
ident  
Sbjct --pyrepaerdwl 326  
DSSP --1111hhhh1111

No 516: Query=mol1A Sbjct=5iiiA Z-score=5.1

[back to top](#)

DSSP -----  
Query ----- 0  
ident  
Sbjct hnlhiteklevlakaysvqgdkwralgyakainalksfhkpvtseyeacsipgigkrmae 60  
DSSP 1111hhhhhhhhhhhhhh111hhhhhhhhhhhhhh111111hhhhhh1111hhhh

DSSP -----11111111hhhhhhh  
Query -----aapyspntlrslrdr 17  
ident  
Sbjct kiieilesghlrkldhisesvpvlelfsniwgagtktaqmwyqqgfrsledirsqsaltt 120  
DSSP hhhhhh1111hhhh1111hhhhhhhh111111hhhhhhhh1111hhhhhh1111h

DSSP hhhhhh1111hHHHHHHHHHHHHHHHLL-LLLLLLLEEEHHHHHHhh11111L  
Query ltqvaerqgvvfgrLQRHVAXIVVAQFAATL-TDDTGAPLLLKVGGSSELRrgipdsrT 76  
ident  
Sbjct qqai glkhysdfIERMPREEATEIEQTVQKAAQAFNSGLLCVACGSYRRGK-----aT 173  
DSSP hhhhhh1hhhhLLEHHHHHHHHHHHHHHHLLLEEEELHHHHLL-----1E

DSSP LLEEEEL-----1LHHHHHHHHHHHHhh1111eeEELLEELL1111LLEEE  
Query SKDFATVAR-----rDIELIHEQLADAGetgwegftaIFTAPEEIAapgxPVKPRRF 128  
ident  
Sbjct CGDVDVLIThpdgrshrgIFSRLDSLRLQEG-----FLTDDLVSQeengQQQKYL 224  
DSSP ELLEEEEEE11111111LHHHHHHHHHHLL-----LEEEEEE1111LLEEE

DSSP EEEEE11EEEEEEEEEEELLLLLL1111eeeee1hhhh111111eeeee1hHHHHhh  
Query TAKLSYrgRAFATVPIEVSSVEAGNAdqfdtlttsdalglvgvpaavpextiPWQIaqk 188  
ident  
Sbjct VCRLPG--PGRRRRLDIIVVPYSEF-----aCALL--- 253  
DSSP EELLLL--LLLLLEEEEEEELHHHH-----hHHHH---

DSSP hhhhh111111111111HHHHHHH-----hhhh11hHHHHhHHHHHHh  
Query lhavtavleepkandraHDLVDLQ-----1leg111dADLXptRSACIai 233  
ident  
Sbjct -----yftgSAHFNRSmralaktkgmslsehalstavpgRVLp--TPTEK-- 296  
DSSP -----hh1LHHHHHHhhhhhh111ee1111ee1111LLEL--LLLHH---

DSSP hhh1111LLEL11111hhhhhhhh1111111111hhhhhhhhhhhhhh1111  
Query fearaqhpWPPRVatlpwpliayaleglhdhlelartvdaaaqavqrfvaridratkr 292  
ident  
Sbjct -----dvfRLLGL-----pyrepaerdw 314  
DSSP -----hhHLLL-----1111hhhh11

No 517: Query=mol1A Sbjct=5dkwB Z-score=5.1

[back to top](#)

DSSP -----  
Query ----- 0  
ident  
Sbjct atnhnlhiteklevlakaysvqgdkwralgyakainalksfhkpvtseyeacsipgigkr 60  
DSSP 1111hhhhhhhhhhhhhh111hhhhhhhhhhhhhh111111hhhhhh11111h

DSSP -----11111111hhhh

Sbjct maekieilesghlrkldhisesvpvlelfsniwgagtktaqmwyqqgfrsleldirsqas 120  
DSSP hhhhhhhhhhh1111hhhh1111hhhhhhhh111111hhhhhhhhhh1111hhhhhhhh11

DSSP hhhhhhhhhhh1111hHHHHHHHHHHHHHHHHLL-LLLLLLLLLEEEHHHHHHHHhh1111  
Query rdrltqvaerqgvvfGRLQRHVAXIVVAQFAATL-TDDTGAPLLLKGGSSLELrrgipd 73  
ident  
Sbjct lttqqaiglkhysdfLERMPREEATEIEQTVQKAaQAFNSGLLCVACGSYRRGK----- 174  
DSSP 11hhhhhhhh1hhhhHLEEHHHHHHHHHHHHHHLLLLLLLEEEHHHHLLLL-----

DSSP 11LLLLLEEEEL-----1LHHHHHHHHHHHHhh1111eeeEELL-EELL1LLLLL  
Query srTSKDFATVAR-----rDIELIHEQLADAGetgwegftaIFTAP-EEIAApGXPVK 124  
ident  
Sbjct -aTCGDVDVLIThpdgrshrgIFSRLDLSLRQEG-----FLTDDIVSQEE-NGQQQ 223  
DSSP -1EELLEEEEEE11111111LHHHHHHHHHHLL-----LEEEeEEEE-ELLEE

DSSP LEEEEEEEE1EEEEEEEEEEEL-LLLL1111eeeee1hhhh111111eeeee1hHH  
Query PRRFTAKLSYrgRAFATVPIEVSSV-EAGNadqfdt1tsdalglvgvpaavpextiPW 183  
ident  
Sbjct KYLGVCRLPG--PGRRRRLDIIIVpYSEF-----aCA 254  
DSSP EEEEEELLL--LLLLLEEEEEEEL1HHHH-----hHH

DSSP HHHhhhhhhhh1111111111HHHHHHH-----hhhh11hHHHHhh  
Query QIaqklhavtavleepkandraHDLVDLQ-----lleg11ldADLXpt 226  
ident  
Sbjct LL-----yftgSAHFNRSmralaktkgmslsehalstavgpgRVLP-- 296  
DSSP HH-----hh1LHHHHHHhhhhhh1lee111lee11111LEEL--

DSSP HHHHHhhhhhh1111LLLLL1111hhhhhhhh1111111111hhhhhhhhhhhhhh  
Query RSACIaifearaqhpWPRVAtlphwplyagalegldhlelartvdaaaqavqrfvari 286  
ident  
Sbjct TPTEK-----dvfRLLGLP-----yre 313  
DSSP LLLHH-----hhhLLLLL-----111

DSSP hh1111  
Query dratkr 292  
ident  
Sbjct paerdw 319  
DSSP hhh111

No 518: Query=mol1A Sbjct=4xa5A Z-score=5.1

[back to top](#)

DSSP -----  
Query ----- 0  
ident  
Sbjct hn1hiteklevlakaysvqgdkwralgyakainalksfhkpvtsyqeaxsipgigkrmae 60  
DSSP 1111hhhhhhhhhhhh111hhhhhhhhhhhhhh111111hhhhhh1111hhhh

DSSP -----111111111hhhhhh  
Query -----aapysspptnlrslrdr 17  
ident  
Sbjct kiieilesghlrkldhisesvpvlelfsniwgagtktaqmwyqqgfrsleldirsqasltt 120  
DSSP hhhhhhh1111hhhh1111hhhhhhhh111111hhhhhhhh1111hhhhhh111h

DSSP hhhhhhh1111hHHHHHHHHHHHHHHHHLL-LLLLLLLLLEEEHHHHHHHHhh11111L  
Query ltqvaerqgvvfGRLQRHVAXIVVAQFAATL-TDDTGAPLLLKGGSSLELrrgipdsrT 76  
ident  
Sbjct qqaiglkhysdfLERMPREEATEIEQTVQKAaQAFNSGLLCVACGSYRRGK-----aT 173  
DSSP hhhhhhh1hhhhHLEEHHHHHHHHHHHHHHLLLLLLLEEEELHHHHLL-----1E

DSSP LLEEEEL-----1LHHHHHHHHHHHHhh1111eeeEELLEELL1111LLLLLEE  
Query SKDFATVAR-----rDIELIHEQLADAGetgwegftaIFTAPEEIAapgxPVKPRRF 128  
ident  
Sbjct CGDVDVLIThpdgrshrgIFSRLDLSLRQEG-----FLTDDLVSQeengQQQKYL 224  
DSSP ELLEEEEEE111111111LHHHHHHHHHHLL-----LEEEEEE111111LEEE

```

DSSP EEEEE1EEEEEEEEEEEELLLLL111eeeee1hhhh111111eeeee1hHHHHhhh
Query TAKLSYrgRAFATVPIEVSSVEAGNAdqfdtlttsdalglvgvpaavavpcxtiPWQIaqk 188
ident | |
Sbjct VCRLPG--PGRRRRRLDIIVVPYSEF-----aCALL--- 253
DSSP EELLLL--LLLLLEEEEEEEELHHHHH-----hHHHH---

DSSP hhhhh1111111111111111HHHHHHH-----hhhhh1hHHHHhhHHHHHHh
Query lhavtavleepkandraHDLVDLQ-----lleg111dADLXptRSACIai 233
ident |
Sbjct -----yftgSAHFNRSmralaktkgmslsehalstavpgRVLp--TPTEK-- 296
DSSP -----hhh1LHHHHHHhhhhhh11eeel111eeel111LLL--LLLH--

DSSP hhhh1111LLLLL11111hhhhhhhhhh1111111111hhhhhhhhhhhhhhhh1111
Query fearaqhpWPPRVat1phwpliyagaleglhdhleartvdaaaqavqrfvaridratkr 292
ident
Sbjct ----dvfRLLGL-----pyrepaerdw 314
DSSP ----hhHLLL-----1111hhhh11

```

No 519: Query=mol1A Sbjct=5dedE Z-score=5.1

[back to top](#)

```

DSSP 1111111111hhhhhhhhhhhhhhLLLLHHHHHHHHHHHHHHHHHHHHLL--LLL--LL
Query aapyspntnlrslrdrltqvaerQGVVFGRLQRHVAXIVVAQFAATLT--DDTG---AP 55
ident |
Sbjct -----dKQWERFLVPYRQAVEELKVKLKGIRtIYEYEdhSP 37
DSSP -----1HHHHHHHHHHHHHHHHHHHHHHHH1LHHH111LL

```

```

DSSP LEEEEhhHHHHhh1LLLLL-----1LLEEEEEELL--LHHHHHHHH
Query LLLVKggSSELErrgIPDSR-----tSKDFATVARR--DIELTHEQL 95
ident | |
Sbjct IEFVT--GRVK---PVASILEkarrksiplheietmqdIAGLRIMCQFvdDIQIVKEML 91
DSSP LLEE--EEL---LHHHHhhhhhh1111hhhhhh111LEEEEEELLhhHHHHHHHH

```

```

DSSP HHHHhh1111eEEEELLEEL---LLLL11LLEEEEEEEEL---1EEEEEEEEEEEL
Query ADAGetgwegfTAIFTAPEE I---AAPGXpvKPRRFTAKLSYR---gRAFATVPIEVSSV 149
ident | |
Sbjct FARK-----DFTVVDQRDYiaehKESG-yRSYHLVLYPLQtvsgeKHVLEIQIRTL 143
DSSP HLL-----LLEEEEEEL111LLL-1LLEEEEEEL1111LLEEEEEEEEH

```

```

DSSP L1111111eeeee1hhhh111111eeeee1hhhhhHHHHHHHLL1111111111hhhh
Query EagnadqfdtlttsdalglvgvpaavavpcxtipwqiAQLHAVTAvleepkandrahd1v 209
ident
Sbjct A-----mnfWATIEHSLN----- 156
DSSP H-----hhHHHHHHHH-----

```

```

DSSP hhhhhhh11hhhhhhhhhhhhHHHH111111111111hhhhhhhh1111111111
Query dlq1leg111dadlxptrsaciaiFEARaqhpwpprvatlphwpliyagaleglhdhlela 269
ident
Sbjct -----ykipekvlrLQRA----- 170
DSSP -----h111hhhhhhHHH-----

```

```

DSSP 11hhhhhhhhhhhhhhhh1111
Query rtvdaaaqavqrfvaridratkr 292
ident
Sbjct ---seaasrldeemseirgevqe 190
DSSP ---hhhhhhhhhhhhhhhh11

```

No 520: Query=mol1A Sbjct=319dB Z-score=5.1

[back to top](#)

```

DSSP 1111111111hhhhhhhhhhhhhh111LHHHHHHHHHHHHHHHHHHLL--LLL--11
Query aapyspntnlrslrdrltqvaerqgvVFGRLQRHVAXIVVAQFAATLT--DDTG---ap 55
ident |

```





```
ident | | | |
Sbjct ---tYEKLLWTTSRVLKVLsvCSSNKPAIVEAG-----gmqalGLHLT----- 238
DSSP ---1LHHHHHHHHHHHHHHH1LLLHHHHHHHLL-----hHHHHHLLLL-----

DSSP hhh1111111111LHHHHHHHHHHHHHHHHHHLLLL-----
Query galegl dhlelarTVDAAAQAVQR FVARIDRATKR----- 292
ident | |
Sbjct -----dPSQRLVQ NCLWTLRNLSDAATKqegmegllgtlvqllgsddinvvtc 286
DSSP -----1LHHHHHHHHHHHHHHHLLLL1111hhhhhhhhhh1111hhhhhhhh

DSSP -----
Query ----- 292
ident | |
Sbjct aagil snl tcnnyknkmmvcqvggiealvrtv lragdreditepaicalrhlt srhqeae 346
DSSP hhhhhhhhh111hhhhhhhhhh11hhhhhhhhhhhhhh111hhhhhhhhhhhhhh11111hh

DSSP -----
Query ----- 292
ident | |
Sbjct maqnavr lhyglpvvkl lhhppshwplikatvg lirn lalcpanhap lreqgaiprlvql 406
DSSP hhhhhhhhh111hhhhhh11111111hhhhhhhhhhhhhh111hhhhhhhhhh11hhhhhhhh

DSSP -----
Query ----- 292
ident | |
Sbjct lvrahqdtqrrfvegvrmeievegctgalhilardvhn rivirg lntip lfvqll yspie 466
DSSP hhhhhhh1111111111111hhhhhhhhhhhhhh111hhhhhhhhhh111hhhhhhhhhh11h

DSSP -----
Query ----- 292
ident | |
Sbjct niqrvaagvlcel aqdkeaaeiaegatapl tel lsrnegvatyaaavl frmse 522
DSSP hhhhhhhhhhhhh111hhhhhhhhhh111hhhhhhhh11111hhhhhhhhhhhhhhhh1
```

No 522: Query=mol1A Sbjct=1v18A Z-score=5.1

[back to top](#)

```
DSSP -----LLL-----11LLLHH
Query -----AAPY-----sPPTNLR 12
ident |
Sbjct traipeltkllndedqvvnkaavmvhq lskkeasrhaimrspqMVSAivrtmqNTNDVE 60
DSSP 11hhhhhhhhhh1111hhhhhhhhhhhhhhhh11hhhhhhhh11hHHHHHHhhhh1LLLHH

DSSP HHHHHHHHHHLL-----11hHHHHHHHHHH-----hh
Query SLRDRLTQVAERQG-----vfgRLQRHVAXIV-----aq 43
ident | |
Sbjct TARCTAGTLHNLShregllaifksgGIPALVKMLGSPvdsvlfyaittlhn111hqega 120
DSSP HHHHHHHHHHHLL1hhhhhhhhhh11HHHHHHHLLLL1hhhhhhhhhhhhhhhh11h

DSSP hhh111111111eEEE-----HHHHHHHLL1111111leeeeee111hhhhhhhh
Query faatltdtgapl1LVKG-----GSSLELRGipdsrtskdfatvrrdieliehq 95
ident | |
Sbjct kmavrlagglqkmvALLNktnvkflaITTDCLQIL----- 155
DSSP hhhhh11hhhhhhHHHH111hhhhHHHHHH-----

DSSP hhhhh1111leeeeee11leell1111111leeeeeeeellleeeeee111111
Query adagetgwef taitftapeeiaapgxpvkprf taklsyrgrafatvpievsveagnad 155
ident |
Sbjct ----- 155
DSSP -----

DSSP 1leeeeee1hhhh11111leeeeeeLHHHHHHHHHHHHh1111111111LHHHHHHHHHH
Query qfdt ltsdalglvgvpaavpcXTIPWQIAQKLHAVtavleepkandRAHDLVDLQLE 215
ident | |
Sbjct -----aynqesklii laSGGPQALVNIMRTY-----tYEKLLWTTSRVL 195
```

DSSP HHL--LHHHHHHHHHHHHHHHHHH11111LLLLL111hhhhhhhhhh111111111LHH  
 Query GLL--LDADLXPTRSACiaifearaqhpwpPRVATlphwpli yagalegldhlelarTVD 273  
 ident | | |  
 Sbjct KVLsvCSSNKPAIVEAG-----gmqa1GLHLT-----dPSQ 226  
 DSSP HHH11LLLHHHHHHHLL-----hHHhHLLL-----1LLH

DSSP HHHHHHHHHHHHHHHHLLL-----  
 Query AAAQAVQRFVARIDRATKR----- 292  
 ident | |  
 Sbjct RLVQNCLWTLRNLSDAATKqegmegllgtlvqllgsddinvvtcaagilsnltcnyknk 286  
 DSSP HHHHHHHHHHHHHHLLL1111hhhhhhhhhh11111hhhhhhhhhhhhhh1111hhhh

DSSP -----  
 Query ----- 292  
 ident  
 Sbjct mmvcqvggiealvrtvragdreditepaicalrhltsrhqeamaqnavrlhyglpvvv 346  
 DSSP hhhhh11hhhhhhhhhhhh111hhhhhhhhhhhhhh11111hhhhhhhhhh111hhhh

DSSP -----  
 Query ----- 292  
 ident  
 Sbjct kllhppshwplikatvglirnlalcpanhaplrqgaiprlvqllvrahqdtqrrqfveg 406  
 DSSP h111111hhhhhhhhhhhhhh111hhhhhhhhhh111hhhhhhhhhhhhhhhh111111

DSSP -----  
 Query ----- 292  
 ident  
 Sbjct vmeeivegctgalhilarvhnrivirgIntiplfvqllyspieniqrvaagvlcelaq 466  
 DSSP 11hhhhhhhhhhhhhh111hhhhhhhhhh111hhhhhhhh11111hhhhhhhhhhhhhh11

DSSP -----  
 Query ----- 292  
 ident  
 Sbjct dkeaeaeiaegatapl tellhsrnegvatyaaavlfmse 507  
 DSSP 1hhhhhhhh111hhhhhh11111hhhhhhhhhhhhhh11

No 523: Query=mol1A Sbjct=1t08A Z-score=5.1

[back to top](#)

DSSP -----LLL-----11LL  
 Query -----AAPY-----ssPP 8  
 ident  
 Sbjct aelatraipeltkllndedqvvnkaavmvhqlskeasrhaimrspqMVAivrtmqNT 60  
 DSSP 1hhhh1hhhhhhhh11111hhhhhhhhhhhhhh111hhhhhhhh11hhHHHHHHHHHLLL

DSSP LLHHHHHHHHHHHHHLL-----11hHHHHHHHHHH-----  
 Query TNLRSRLDRLTQVAERQG-----vfvGRLQRHVAXIV----- 40  
 ident | |  
 Sbjct NDVETARCTAGTLHNLSHhregllaifksgGIPALVKMLGSpvdsvlfyaittln11h 120  
 DSSP LLHHHHHHHHHHHHHLL1hhhhhhhh11HHHHHHHHHLL1hhhhhhhhhhhhhhhh

DSSP -hhhhhh111111111eEEH-----HHHHHHHLL111111111eEEE111hhhh  
 Query -vaqfaat1tdtgap11LVKG-----GSSLELRGipdsrskdfatvarrdieli 91  
 ident |  
 Sbjct qegakmavrlagglqkmvALLNktnvkflaITDCLQIL----- 159  
 DSSP 111hhhhhh11hhhhhhHLL111hhhhHHHHHHHH-----

DSSP hhhhhhhhh11111eEEE111e111111111eEEEEEE111eEEEEEE111  
 Query heqladagetgwegftaiftapeeiaapgxpvkprfktaklsyrgrafatvpievssvea 151  
 ident  
 Sbjct ----- 159  
 DSSP -----

DSSP 11111eEEE1hhhh11111eEEE11HHHHHHHHHHHH111111111LLHHHHHH

Sbjct -----aygnqesklilaSGGPQALVNIMRTY-----tYEKLLWTT 195  
DSSP -----h111hhhhhhhhhhLLHHHHHHHHHHHL-----1LHHHHHHH

DSSP HHHHHHL--LHHHHHHHHHHhhhhhhhh11111LLLLL111hhhhhhhh11111111  
Query QLLEGLL--LDADLXPTRSACiaifearaqhpwPRVATlphwpliyagalegldhlela 269  
ident | | | |  
Sbjct SRVLKVLsvCSSNKPAIVEAG-----gmqalGLHLT----- 226  
DSSP HHHHHH11LLHHHHHHHL-----hhhhHLLL-----

DSSP 1LHHHHHHHHHHHHHHHHHL-----  
Query rTVDAAAQAVQRFVARIDRATKR----- 292  
ident | |  
Sbjct dPSQRLVQNCLWTLRNLSDAATKqegmegllgtlvqllgsddinvvtcaagilsnlctnn 286  
DSSP 1LHHHHHHHHHHHHHHHHHL1111hhhhhhhhhh1111hhhhhhhhhhhhhh1111

DSSP -----  
Query ----- 292  
ident -----  
Sbjct yknkmmvcvggiealvrtvrlragdreditepaicalrhltsrhqeamaqnavrlhygl 346  
DSSP hhhhhhhhh11hhhhhhhhhhhh11hhhhhhhhhhhhhh11111hhhhhhhhhh11h

DSSP -----  
Query ----- 292  
ident -----  
Sbjct pvvvkl1hppshwplikatvglirnalcpnanhaplreqgaiprlvqllvrahqdtqrqf 406  
DSSP hhhhh111111hhhhhhhhhhhh11hhhhhhhh11hhhhhhhhhhhhhhhh111

DSSP -----  
Query ----- 292  
ident -----  
Sbjct vegvrmeivegctgalhilarvdhnrivirgltiplfvqllyspieniqrvaagvlce 466  
DSSP 11111hhhhhhhhhhhhhh11hhhhhhhh11hhhhhh11111hhhhhhhhhhhh

DSSP -----  
Query ----- 292  
ident -----  
Sbjct laqdeaaeiaeaegatapl tellhsrnegvatyaaavlfmrse 510  
DSSP h111hhhhhhhh111hhhhhh1111hhhhhhhhhhhhhh1

No 524: Query=mol1A Sbjct=4rwpA Z-score=5.0

[back to top](#)

DSSP 111111111hhhhhhhhhhhhHLL--LHHHHHHHHHHHHHHHH--LLLLLLLLLLE  
Query aapyssptnlrslrdrltqvaERQG-VVFGRLQRHVAXIVVAQFAA--TLTDDTGAPLL 57  
ident | | | | | | | | | |  
Sbjct -----melrhtpardldkfiEDHLLpNTCFRTQVKEAIDIVCRFLKerCFQGTADPVRV 54  
DSSP -----11hh11hhhhhhhhHLL1LHHHHHHHHHHHHHHHHHH1L1L1L1L1L1LLE

DSSP -EEEEHHhHHHHHLL11111LEEEEEELL-----LHHHHHHHHHHHHHLL--LL  
Query -LVKGGsLELRRGIPdsrtsKDFATVARR-----DIELIHEQLADAGETGW--EG 105  
ident | | | | | | | | | |  
Sbjct sKVVKGG-SSGKGTTLrgrsdADLVVFLTKltsfedqlrRRGEFIQEIRRQLEACQreQK 113  
DSSP eEEEEELH-HHHHLL1111eEEEEEEELL111hhhhhhHHHHHHHHHHHHHH1L

DSSP EEEEEEL11ee111111111EEEEEEEL-leeEEEEEEELLL11111leeeelh  
Query FTAlFTapeeiaapgxvpkPRRFTAKLSYR-graFATVPIEVSSVEAGnadqfdt1tsda 164  
ident | | | | | | | | | |  
Sbjct FKVTFE----vqsprrenpRALSFVLSspq1qqEVEFDVLPFDALG----- 156  
DSSP LEEEEL----111111111LEEEEEELL1111LEEEEEEEELLL-----

DSSP hhh11111leeeelLHHHHhhhhhhhh1111111111hhhhhhhhhh11hhhhh  
Query lglvgvpaavavpcxTIPWqiaqklhavlavlepkandradhldvldqllegl1ldadlx 224  
ident -----  
Sbjct -----QWTP-----g 161  
DSSP -----LLL-----1

DSSP HHHHHhHHHHHHHLL-----111111  
Query PTRSacIAIFEARAQ-----hpwppr 245  
ident |  
Sbjct YKPN--PEIYVQLIKecksrgkegefstcftelqrdflrnrptklkslirlvkhwytck 219  
DSSP LLLL--LHHHHHHHHhh11111111hhhhhhhhhhhh111hhhhhhhhhhhhhhhh

DSSP 111111hhhhhHHHH-----1111111111hHHHHhhHHHH--  
Query vat1phwplyAGAL-----egldhlelartvDAAAQavQRFV-- 283  
ident | |  
Sbjct kthgnklppqyALELltvyaweqgsrktdfstaqgftvlelvkqhKLCI--FWEAyy 276  
DSSP hhh11111hhHHHHhhhhhhhh111111hhhhhhhhhhhhhhHLEE--LLLL11

DSSP -----  
Query ----- 283  
ident -----  
Sbjct dftnpvgrcmlqllkprpvildpadptgnvggdthswqrlaqearvwlgyeacknld 336  
DSSP 1111hhhhhhhhhh1111lee111111111111hhhhhhhhhhhhhh11hhhh1111

DSSP -hhhhh1111  
Query -aridratkr 292  
ident  
Sbjct gslvgawtml 346  
DSSP 1111111111

No 525: Query=mol1A Sbjct=319dA Z-score=5.0

[back to top](#)

DSSP 1111111111hhhhhhhhhhhhhhLHHHHHHHHHHHHHHHHHLL--LLLL--LLLL  
Query aapyspntnlrslrdlqtvaerQGVVFGRLQRHVAXIVVAQFAATL--TDDT--GAPL 56  
ident |  
Sbjct -----MNWEEFLDPYIQAVGELKIKFRGIrkQFRKqkRHSP 36  
DSSP -----LHHHHHLLHHHHHHHHHHHHHHHHHHhhHHHH11LLLL

DSSP -EEEEhHHHHhh111111L-----1LLEEEEEELL--LHHHHHHH  
Query -LLVKggSSElrrgIPDSR-----tSKDFATVARR--DIELIHEQ 94  
ident | |  
Sbjct iEFVT--GRVK----PIESIkekmlrgikkenltqdmqDIAGLRIMVQFvdDVNDVLEL 90  
DSSP 1LEEE--EEL-----LHHHHhhhhhh111hhhhhh111LEEEEEELL1HHHHHHHH

DSSP HHHHHhh1111eEEEELLEEL-LLLL111LLEEEEEEEEL---1EEEEEEEEEEELL  
Query LADAGetgwegfTAIFTAPEEI-AAPGxpKPRRFTAKLSYR---gRAFATVPIEVSSVE 150  
ident | |  
Sbjct LRQRK-----DMKVIQERDYiNKPsgyRSYHVIVEYVPVDtisgQRIIMAEIQIRTLA 143  
DSSP HLLLL-----LLEEEEEEE11LLL111LEEEEEEEEEEEe11eEEEEEEEEEEHH

DSSP 111111eEEEElhhhh111111eEEEElhhhhHHHHHHHLL1111111111hhhhh  
Query agnadqfdtltaldalglvgpaavavpcxtipwqiAQLHAVTAvleekandradlvd 210  
ident  
Sbjct -----mnfWATIEHSLN----- 155  
DSSP -----hhHHHHHHHHHH-----

DSSP hhhhhhh11hhhhhhhhhhhhhhhh111111111111LHHHHHHhh1111111111  
Query lqllegl1ldadlxptrsaciaifearaqhpwpprVATLPHWplyagaleglhdhlelar 270  
ident  
Sbjct -----kyyhGEFPEDI-----krrleltski 176  
DSSP -----hhh111111HH-----hhhhhhhhhh

DSSP lhhhhhhhhhhhhhhhh1111  
Query tvdaaaqavrfvaridratkr 292  
ident  
Sbjct afqldeemrqirddikeaqlf 198  
DSSP hhhhhhhhhhhhhhhhh1111





DSSP hhHHHH---hHHHLLLL-----  
Query avQRFV---aridRATKR----- 292  
ident |  
Sbjct vtFRRPdgyltkqKGTSDryilaiedpfeishnvgtrtvsssglyrirgefmaasrlln 294  
DSSP eLLLLL11111hHHLLLL11111ee111111111hHHH11hHHHHHHHHHHHHHHHHH1

DSSP -----  
Query ----- 292  
ident |  
Sbjct ssypipydslfefapipp 312  
DSSP 11111hHHHH111111

No 529: Query=mol1A Sbjct=4nktB Z-score=5.0

[back to top](#)

DSSP 111111111hHHHHHHHHHHHH11LLHHHHHHHHHHHHHHHHLL11111LLEEEE  
Query aapyspntnlrslrdrltqvaerqgVVFGRQLQRHVXIVVAQFAATLTddtgaPLLVK 60  
ident | |  
Sbjct -----dmshkeftkfcyevyneikiSDKEFKEKRAALDTLRLCLKRIS-----PDAELV 49  
DSSP -----111hHHHHHHHHHHHH11LHHHHHHHHHHHHHHHHHHL-----LLEEEE

DSSP HHHHHHHH1111111LLEEEEE111hHHHHHHHHHHH111eEEEELLLEE1111  
Query GGsslelrrgipdsrtsKDFATVArddieLIHEQLADAGETGwegfTAIFTAPEEiaapg 120  
ident | |  
Sbjct AF--gslesglalknsdMDCVLM-----TIALQFYEEELIAE----GFEGKFLQI----- 93  
DSSP EE--1hHHH1111111EEEEEL-----LHHHHHHHHHHL-----LLEEEEL-----

DSSP 11111EEEEEEeelleEEEEEEEEe111111111eeeee1hHHH11111eeeee1  
Query xpvkpRRFTAKLsyrgraFATVPIEVSSveagnadqfdlttsdalglvgvpaavpcxt 180  
ident |  
Sbjct -----PIIKLTS-----SFQCAIGFN----- 109  
DSSP -----LLEEEEL-----LLEEEEL-----

DSSP hHHHHHHHHHH1111111LLLLhHHHHHHHHHH11hHHHHHHHHHHHHHHH11  
Query ipwqiaQKLHAVtavleepkaNDRAhdldqllegl1ldadlxptrsaciaifearaqh 240  
ident |  
Sbjct --nr1aIHNTLL-----LSSY----- 123  
DSSP --1hHHHHHHHH-----HHHH-----

DSSP 111111111LHHHhHHHHHLL-LLLL-----1111LHHHHH-----  
Query pwprvatlpHWPLiYAGALEG-LDHL-----elarTVDAAAQ----- 277  
ident |  
Sbjct -----tkLDAR-LKPMVLLvKHWArkqinspyfgt1ssygyvmVLYYL1Hvikpp 174  
DSSP -----hhLLLL-HHHHHHHHhHHHHh1111hHH1111hHHHHHHHHHHHH1111

DSSP -----  
Query ----- 277  
ident |  
Sbjct vfpnll1splkqekivdgdvdfddkledippsqnysslgsl1hgffrfyaykfeprekv 234  
DSSP 1111hHH111111lee1lee11111hHH111111111hHHHHHHHHHHHH111111

DSSP hhHHHH---hHHHLLLL-----  
Query avQRFV---aridRATKR----- 292  
ident |  
Sbjct vtFRRPdgyltkqEKGWTSryilaiedpfeishnvgtrtvsssglyrirgefmaasrllns 294  
DSSP 11LLLL11111hHLLLL1111111111111111111hHHH11hHHHHHHHHHHHHHHH1

DSSP -----  
Query ----- 292  
ident |  
Sbjct rsypipydslfefa 308  
DSSP 11111hHHHH111

[back to top](#)

```
DSSP 1111111111hhhhhhhhhhhhhhhh1LLLHHHHHHHHHHHHHHHHHHH-LLLLLL-ILLEE
Query aapyspntnlrsldr1tqvaerqGVVFGRLQRHVAXIVVAQFAA-TLDDTG-aPLL 58
ident
Sbjct -----k1kkvldklrLKRKDISEAAETVNKVVERLLrRMQKREsefKGVE 45
DSSP -----1hhhhhhhh1LLHHHHHHHHHHHHHHHHHHHHLLLLLL1LLLE
```

```
DSSP EEHHhhhhhh111LLL-----1LEEEEL-----
Query VKGGsslelrrgipDSRT-----sKDFATVAR----- 85
ident
Sbjct QLNT-----gsyyEHVKisapneFDVMFKLEvpriellqeyyetgafylvkfkprgnpls 99
DSSP EEEE-----1hhHLLL1111leEEEEEE11leeeel1111leeeel11111h
```

```
DSSP -----1LHHHHHHHHHHHHHLLLEEEELLe1111111111EEEEEEe
Query -----rDIELIHEQLADAGETGwEGFTAIFTAPEeiaapgxvpkRRFTAKLSy 134
ident
Sbjct hflegevlstakMLSKFRKIIEEVEKEI-KDIDVSVEKEK-----pgsPAVTLLIR- 149
DSSP hheellee1hhHHHHHHHHHHHHHLLL-LLEEEELLL-----11LEEEEEE-
```

```
DSSP 11EEEEEEEEEEELLLL-----1111leeeelhhhh1111lee
Query rgRAFATVPIEVSSVEAG-----nadqfdtltsdalglvgyvaava 175
ident
Sbjct -nP EEISVDIILALESKGswpistkeglpiqgw1gtkvrtnlrrepfylvpknakdgnsf 208
DSSP -1LEEEEEEELLLL111hh1111111111hhhhhh111leeeel1111111
```

```
DSSP ee11hHHHHHHHHHHHh1111111111hhhhhhhhhh11hhhhhhhhhhhhhh
Query vpcxtiPWQIaQKLHAVtavlepkandrahdldvlqllegllldadlxptrsaciaife 235
ident
Sbjct qgetwrLSFS-HTEKYI----- 224
DSSP 111leeEELH-HHHHHH-----
```

```
DSSP hh1111111111LLL-----hhHHHHHHL-LLLL-----1111
Query araqhpwprvaTLPH-----wpLIYAGALE-gLDHL-----elart 271
ident
Sbjct -----lnnhGIEKtccessgakCCRKECLK1mKYLLeqlkkefqeldafcsyhvкта 276
DSSP -----hh11LLL1111111111LHHHHHHhhHHHHhhhhhh1hh111hhhhhh
```

```
DSSP hHHHHH-----hhhhhhHHHH-----
Query vdAAAQ-----avqrfvaRIDR----- 288
ident
Sbjct ifHMWTqdpqdsqwdprnlsscfdkllaffleclrtekldhyfipkfnLFSqelidrksk 336
DSSP hHHHHHh11hhhh1hhhhhhhhhhhhhhhhhh1111111111LLL1111hhhh
```

```
DSSP -----1111
Query -----atkr 292
ident
Sbjct eflskkieyernngfpifd 355
DSSP hhhhhhhhhhh11hhhh1
```

No 531: Query=mol1A Sbjct=2pfoA Z-score=5.0

[back to top](#)

```
DSSP -----
Query ----- 0
ident
Sbjct nhiteklevlakaysvqgdkwralgyakainalksfhkpvtsyqeacsipgigkrmaek 60
DSSP 1111hhhhhhhhhhhh11hhhhhhhhhhhh11111111hhhh11111hhhhhh
```

```
DSSP -----1111111111hhhhhhhh
Query -----aapyspntnlrsldr1 18
ident
Sbjct iieilesghlrklhdhisesvpvlelfsniwgagtktaqmwyqgfrsleldirsqaslttq 120
DSSP hhhhh1111hhhh1111hhhhhhhh11111hhhhhhhh1111hhhhhh1111h
```



```

Query tqvaerqgvvfgRlqRHVAXIVVAQFAATL-TDDTGAPLLLKGGSSLELrrgipdsrTS 77
ident
Sbjct qaiglkhysdfLermPREEATEIEQTVQKAAQAFNSGLLCVACGSYRRGK-----aTC 173
DSSP hhhhhh111hhh11eEHHHHHHHHHHHHHHLLEEEELHHHHLLL-----1EE

DSSP LEEEEEL-----1LHHHHHHHHHHHHhh1111eeEELLEEL11111LLEEEEE
Query KDFATVAR-----rDIELIHEQLADAGetgwegftaIFTAPEELaapgxPVKPRRFT 129
ident
Sbjct GDVDVLIThpdgrshrgIFSRLDLSLRQEG-----FLTDDLVSqeengQQQKYLGV 224
DSSP LEEEEEL11111111LHHHHHHHHHHHL-----LEEEEEEL11111LLEEEEE

DSSP EEEEE1EEEEEEEEEEEL-LLLL1111eeeee1hhhh11111eeeee1hHHHHhh
Query AKLSYrgRAFATVPIEVSSV-EAGNadqfdtltsdalglvgvpaavavpcxtiPWQIaqk 188
ident
Sbjct CRLPG--PGRRHRRLDIIVpYSEF-----aCALL--- 252
DSSP ELLL--LLLLLEEEEEEEEL1HHHH-----hHHHH--

DSSP hhhhh111111111111HHHHHH-----hhhh11hHHH
Query lhavtavleekandraHDLVDLQ-----llegl1ldADL 223
ident
Sbjct -----yftgSAHFNRSmralaktkgmslsehalstavvrnthgakvgpgRVL 299
DSSP -----hh1LHHHHHHhhhhhh11eeel111eeel111111111111EEL

DSSP HhhHHHHhhhhhh1111LL1111hhhhhhhh11111111hhhhhhhhhh
Query XptRSACIaifearaqhpWPPRVat1phwpliyagalegldhlelartvdaaaqavqrfv 283
ident
Sbjct P--TPTEK-----dvfRLLGL-----p 314
DSSP L--LLLHH-----hhHHLLL-----1

DSSP hhhhh1111
Query aridratkr 292
ident
Sbjct yrepaerdw 323
DSSP 111hhhh11

```

No 532: Query=mol1A Sbjct=1rzte Z-score=5.0

[back to top](#)

```

DSSP ----- 0
Query -----
ident
Sbjct tnhlhiteklevlakaysvgdkwralgyakainalksfhkpvtsyqeacsipigikrm 60
DSSP 1111hhhhhhhhhhhhhh11hhhhhhhhhhhh11111111hhhh11111hh

DSSP -----111111111hhhh
Query -----aapyspntlrslr 15
ident
Sbjct aekiieilesghlkrldhisesvpvlelfsniwgagtktaqmwyqqgfrsleldirsqasl 120
DSSP hhhhhhhhh111hhhh1111hhhhhhhh111111hhhhhhhhhh1111hhhhhhhh11

DSSP hhhhhhhhh1111HHHHHHHHHHHHHHHL-LLLLLEEEHHHHHHHHhh1111
Query drltqvaerqgvvfgRLQRHVAXIVVAQFAATL-TDDTGAPLLLKGGSSLELrrgipds 74
ident
Sbjct ttqqaiglkhysdfLERMPREEATEIEQTVQKAAQAFNSGLLCVACGSYRRGK----- 173
DSSP 1hhhhhhhh1hhhhLLEHHHHHHHHHHHHHHHLLEEEELHHHHLLL-----

DSSP 1LLLLEEEEEL-----1LHHHHHHHHHHHHhh1111eeEELL-EELLLL1LLL
Query rTSKDFATVAR-----rDIELIHEQLADAGetgwegftaIFTAP-EEIAAPGxPVKP 125
ident
Sbjct aTCGDVDVLIThpdgrshrgIFSRLDLSLRQEG-----FLTDDIVSQEENG-QQK 223
DSSP 1EELLEEEEEEL11111111LHHHHHHHHHHHL-----LEEEeEEEEEL-LEE

DSSP EEEEEEE1EEEEEEEEEEEL-LLLL1111eeeee1hhhh11111eeeee1hHHH
Query RRFTAKLSYrgRAFATVPIEVSSV-EAGNadqfdtltsdalglvgvpaavavpcxtiPWQ 184
ident

```

DSSP Hhhhhhhhh111111111111HHHHHHH-----hhhhhllhh  
Query IaqlkhavtavleepkandraHDLVDLQ-----lleglllda 221  
ident  
Sbjct L-----yftgSAHFNRSmralaktkgmslsehalstavvrnthgckvqp 298  
DSSP H-----hhh1LHHHHHHhhhhhh1leee111leee111111111111

DSSP hhhhhHHHHHHhhhhhh1111LLLLL11111hhhhhhhhhh11111111111hhhhhhhhhh  
Query dlxptRSACIaifearaqhpWPPRVatlphwpliyagalegl dhlelartvdaaaqavqr 281  
ident  
Sbjct grvlpTPTEK-----dvfRLLGL----- 316  
DSSP 11111LLLHH-----hhhHHHLL-----

DSSP hhhhhhh1111  
Query fvaridratkr 292  
ident  
Sbjct -pyrepaerdw 326  
DSSP -1111hhhh111

No 533: Query=mol1A Sbjct=5f2v0 Z-score=5.0

[back to top](#)

DSSP 1111111111hhhhhhhhhhhhHLLLLHHHHHHHHHHHHHHHHHHLL--LLLL--LLL  
Query aapyspntnlrslrdrltqvaeRQGVVFGRLQRHVAXIVVAQFAATL--TDDT--GAPL 56  
ident  
Sbjct -----DKQWERFLVPYRQAVEELKVKLKGirtLYEYedDHSP 37  
DSSP -----LLLHHHHHHHHHHHHHHHHHHHHHHHHHHHHHHhHHHH11LLL

DSSP -EEEEhhHHHHhh11LLLL-----1LLEEEEEELL--LHHHHHHHH  
Query -LLVKggSSLElrrgIPDSR-----tSKDFATVARR--DIELTHEQL 95  
ident  
Sbjct iEFVT--GRVK---PVASiIekarrksiplheietmqdIAGLRIMCQFvdDIQIVKEML 91  
DSSP 1LEEE--EEEL---LHHHHhhhhhh1111hhhh11111LEEEEEELLhhHHHHHHHH

DSSP HHHhh1111eEEEELLle111111111111LLEEEEEEEEL---IEEEEEEEEEELL11  
Query ADAGetgwegfTAIFTApeeiaapgxPVKPRRF TAKLSYR---gRAFATVPIEVSSVEag 152  
ident  
Sbjct FARK-----DFTVVD-----GYRSYHLVVLYPLQtvsGKHLVVEIQIRTLA-- 133  
DSSP HHL-----LLEEL-----LLEEEEEEEEEEEElleEEEEEEEEEEHH--

DSSP 1111leeeelhhhh11111leeeelhhhhHHHHHHHLL1111111111hhhhhh  
Query nadqfdt1tsdalglvgvpaavavpcxtipwqiAQKLHAVTAvelepkandrahdldvlq 212  
ident  
Sbjct -----mnfWATIEHSLN----- 145  
DSSP -----hhhHHHHHHHH-----

DSSP hhhhh11hhhhhhhhhhhhhhhhhh111111111111LHhhhhhhhh1111111111h  
Query llegllldadlxptrsaciaifearaqhpwppRVATLPHWpliyagalegl dhlelartv 272  
ident  
Sbjct -----ykySGNIPEKV-----klrlqras 164  
DSSP -----hh1LLLLLHH-----hhhhhhh

DSSP hhhhhhhhhhhhhhh1111  
Query daaaqavqrfvaridratkr 292  
ident  
Sbjct eaasrldeemseirgevqea 184  
DSSP hhhhhhhhhhhhhhhhh11

No 534: Query=mol1A Sbjct=5d46A Z-score=5.0

[back to top](#)

DSSP -----

```
Sbjct kisqyacqrtrtlmnynqlftdaldilaendelrenegsclafmrassvklslpfpitsm 60
DSSP 11111hhhl111111111hhhhhhhhhhhhhhhh111hhhhhhhhhhhhhh11111111h

DSSP -----
Query ----- 0
ident

Sbjct kdteqipclgdkvksiiiegiedesseakavlnderyksfklftsvfgvlgktaekwfr 120
DSSP hhh111111hhhhhhhhhhhh111hhhh111hhhhhhhhhh11111hhhhhhhhh

DSSP --111111111hhhhhhhhhhhh111hhhhHHHHHHHHHHHHHLL-LLLL1LLLE
Query --aapyspntlrsldrldtqvaerqgvfgrlQRHVAXIVVAQFAAT-LTDDtGAPLL 57
ident | |
Sbjct mgftrtlskiqsdkslrftqmkgagflyyedlvscVNRPEAEAVSMLVKEaVVTf1PDALV 180
DSSP 11111hhhh111111111hhhhhhhh1hhhh11EEHHHHHHHHHHHHHHHHH1LLLEE

DSSP EEEHHHHHHhh111111LLLEEEEEE1-----1LHHHHHHHHHHHHhh111leee
Query LVKGGSSLELrrgipdsrTSKDFATVAR-----rDIELIHEQLADAGetgwegfta 108
ident | | | |
Sbjct TMTGGFRRGK-----mTGHDVDFLITspatedeeqqLLHKVTDfWKQGG----- 224
DSSP EEELLLLLL-----1EELEEEEEE1111hhhhhhHHHHHHHHHHHLL-----

DSSP EELLEELL-----1LLLEEEEEEEEEEL---1EEEEEEEEEEEL-LLLL1111e
Query IFTAPEEIAA-----pGXPVKPRRFTAKLSYR---gRAFATVPIEVSSV-EAGNadqfd 158
ident | |
Sbjct LLLYCDILESpsrkvdaLDHFQKCFILKLDHGrvhgKGWKAIRVDLVMCPYDRR----- 279
DSSP LEEELLEELL111111LLLEEEEEEEELHhh1111LLLEEEEEEEELHhhh-----

DSSP eeeelhhhh111111eeeee1hHHHHhhhhhh1111111111HHHHHHH-----
Query tltsdalglvgvpaavapcxtiPWQIaqklhavtavleepkandraHDLVDLQ----- 212
ident
Sbjct -----aFALL-----gwtgSRQFERDlrryat 301
DSSP -----hHHHH-----hhhlHHHHHHhhhhhh

DSSP -----hhhh11hhhhhhHHHHhhhhhh1111LLLL1111hhhhhhhh1111
Query -----llegllldadlxtRSACIaifearaqhpWPPRVAtpHwpliyagalegld 264
ident
Sbjct herkmmldnhalydrtkrvfleAESEE-----eifAHLGLD----- 337
DSSP hhhleee1111ee1111ee1LLLHH-----hhHHHLLL-----

DSSP 111111hhhhhhhhhhhhhhhh1111
Query hlelartvdaaaqvqrfvaridratkr 292
ident
Sbjct -----yiepwerna 346
DSSP -----111hh111
```

No 535: Query=mol1A Sbjct=5iioA Z-score=5.0

[back to top](#)

```
DSSP -----
Query ----- 0
ident

Sbjct atnlnhiteklevlakaysvgdkwralgyakainalksfhkpvtsyqeacsipgigkr 60
DSSP 11111hhhhhhhhhhhhhh111hhhhhhhhhhhh111111hhhhhh1111hh

DSSP -----111111111hhhh
Query -----aapyspntlrsldrldtqvaerqgvfgrlQRHVAXIVVAQFAATL-TDDTAPLLLVKGGSSLELrrgipd 14
ident | | | |
Sbjct maekiieilesghlrklhdisesvpvlelfsniwgagtktqmqwqqgfrsledirsqs 120
DSSP hhhhhhhhh111hhhh111hhhhhhhh11111hhhhhhhh1111hhhhhh11

DSSP hhhhhhhhh1111hHHHHHHHHHHHHHHHHHLL-LLLLLLLEEEHHHHHHhh1111
Query rdrltqvaerqgvfGRLQRHVAXIVVAQFAATL-TDDTGAPLLLVKGGSSLELrrgipd 73
ident | | | |
Sbjct lttqqaiglkhydfLERMPREEATEIEQTVQKAaQAFNSGLLCVACGSYRRGK----- 174
DSSP 1hhhhhhhh1hhhhHLLLEEHHHHHHHHHHHHHHHLLLLLEEEELHHHHLLL-----
```



DSSP Hhh111111leeeELLLLleeeel111leeeel11111hhhhhhhhhhhhhhhh11

DSSP -----  
 Query ----- 285  
 ident -----  
 Sbjct slgffkpkhpleieperlrkiveergtavfavkfrkpdvddnlypqlerasrkifefle 308  
 DSSP lhhhh111111111hhhhhhhhhhhh1leeeeeeeel1111hhhhhhhhhhhhhhhhhh

DSSP -----  
 Query ----- 285  
 ident -----  
 Sbjct renfmplrsafkaseefcyllfecqikeisrvfrrmgppqfedernvkkflsrnrafrpfi 368  
 DSSP h1111leeeeeeeel1leeeeeeeel1111leeeeeeeel11hhhhhhhhhh11111lee

DSSP -----  
 Query ----- 285  
 ident -----  
 Sbjct engrwwafemrkfttpeegvrasyasthwhltlgnvgesireyfeiiisgeklfkepvtael 428  
 DSSP elleeeeeee1111hhhhhhhhhhhh1hhhh11hhhhhhhhhh1leeeehhhhhhh111hhhh

DSSP -hhh1111  
 Query -idratkr 292  
 ident -----  
 Sbjct cemmgvkd 436  
 DSSP hhhh1111

No 537: Query=mol1A Sbjct=3ouyA Z-score=5.0

[back to top](#)

DSSP 111111111hhhhhhhhhhhh11LLHHHHHHHHHH-HHHHHHHHHLLL1111LLEEE  
 Query aapyspntnlrsldrdr1tqvaerqgVVFGRQLQRHVA-XIVVAQFAATLTddtgaPLLLV 59  
 ident |  
 Sbjct -----mkveeilekalelviPDEEEVRKGRaEEELRRRLDELG----VEYVF 44  
 DSSP -----11hhhhhhhhhh1111LHHHHHHHHHHHHHHHHHHHHLL-----LLEEE

DSSP EHHHHHHhhhh111LLL--1LLEEEEL-----1LHHHHHHHHhhhhhh11le  
 Query KGSSELrrgipDSRT--sKDFATVAR-----rDIELIHEQLadagetgwegf 106  
 ident |  
 Sbjct VGSYAR-----NTWLkgsLEIDVFLlpeefskeelreRGLEIGKAV----- 86  
 DSSP ELLHHH-----LLL111LEEEEEEEe11111hhhhhhHHHHHHHHHH-----

DSSP eeeELLLLELLL1111LLEEEEEEEeeel1leeeEEEEEELLLL1111leeeelhhh  
 Query taiFTAPEEIAApgxpVKPRRFTAKlsyrgrafaTVPIEVSSVEAGnadqfdtltsdalG 166  
 ident | |  
 Sbjct --1DSYEIRYAE---HPYVHGvvk-----GVEVDVPCYKL----- 117  
 DSSP --1LEEEELLLL---LLEEEEL-----LEEEEEEEEL-----

DSSP h11111leeeeeLLHHHHHH-----hhhhhhLLL1111L1111LHH  
 Query lvgvpaavavpcXTIPWQIA-----qklhavTAVLeapKANDRAHD 207  
 ident -----  
 Sbjct kepkniksavdrTPFHHKWLegrirkenevrllkgf1kangiYGAEYK---VRGFSGY 173  
 DSSP 1111111111HHHHHHHHhh11111hhhhhhhhhhhh11111LLL---L1111LHH

DSSP HHHHHHHhhhh11hhhhhhhhhhhhhhhh111111111111hhhhhhhhhh11111L  
 Query LVDLQLleg11dadlxptrsaciaiafearaqhpwpprvat1phwpliyagalegldh1E 267  
 ident | |  
 Sbjct LCELLI-----vfYG 183  
 DSSP HHHHHH-----hhhL

DSSP LLL--LHHH---hhhhHHHHHH-----  
 Query LAR--TVDA---aaqavQRFVAR----- 285  
 ident |  
 Sbjct SFLEtVKNArrwrrtvIDVAKGevrkgeeffvdpvdekrnvaanlsldnarfvhlcr 243  
 DSSP LHHhhHHHH11111leEELLLLleeeel11leeeel11111hhhhhhhhhhhh

```

Query ----- 285
ident
Sbjct efmeapslgffkpkhpleieperlrkiveergtavfavkfrkpdvddnlypqlerasrk 303
DSSP hhhh111hhhh11lee1111hhhhhhhhhh1leeeeeee1111hhhhhhhhhhhhhhhh

DSSP -----
Query ----- 285
ident
Sbjct ifeflerenfmp1rsafkaseefcyllfecqikeisrvfrrmgpqedernvkkflsrnr 363
DSSP hhhhhhh1111leeeeeee11leeeeeee111111leeeeeee11hhhhhhhh11111

DSSP -----
Query ----- 285
ident
Sbjct afrpfiengrwwafemrkfttpeegvrsyasthwhtlgknvgesireyfeisgeklfke 423
DSSP 1111ee1leeeeeee11111hhhhhhhhhhhhhhhhhhhhhhhhhhhhhh1leeeehhhhh11

DSSP -----hhh1111
Query -----idratkr 292
ident
Sbjct pvtaelcemmgvkdccm 441
DSSP 11hhhhhhhh1111lee1

```

No 538: Query=mol1A Sbjct=4wc1A Z-score=5.0

[back to top](#)

```

DSSP 111111111hhhhhhhhhhhhhh1111hhhhhhhhhhhhhhHHHLLLLL11LLEEEEE 60
Query aapyspntnlrslrdrltqvaerqgvfgrlqrhvaxivvaqFAATLTDDtgAPLLLVK
ident
Sbjct -----MVGQIAKE-mGLRAYIV 16
DSSP -----LHHHHHHH-1LLEEEEE

```

```

DSSP HHHHHHHHLL11111LLEEEEEELLLHHHHHHHHHHHHHH1111eeeEELLLEE11111 120
Query GGSSLELRRGIpdsrtSKDFATVARRDIELIHEQLADAGEtgwegftaIFTAPEEiaapg
ident || | | | | | | | | | | | | | | | | | | | | | | | | | | | | | | | |
Sbjct GGVVRDILLGK----eVWDVDFVVEGNAIELAKELARRHG-----VNVHPFP---- 59
DSSP LHHHHHHHLLL----1LLEEEEEELLLHHHHHHHHHHHHHLL-----LLEEEEL----

```

```

DSSP 11LLEEEEEEEeeelleeeEELLLL--LLLL-----1LE 158
Query xpVKPRRFATAK1syrgrafaTVPIEVSSVEA--GNAD-----qFD
ident |
Sbjct -eFGTAHLKIG-----KLEFATARRRepASLKedlirrdftinamaisvnledYG 109
DSSP -1LLEEEEEEL-----LEEEEEELLL111LHHhhhh1111hh1lee11111L

```

```

DSSP EEeelh11111111leeeelLHHH-----hhhhhhHLL11111LLLh1111 209
Query TLtsdalglvgvpaavavpcxTIPW-----qiaqk1haVTAVleepkaNDRAhd1v
ident || | | | | | | | | | | | | | | | | | | | | | | | | | | | | | | | |
Sbjct TL-----IDYFgglrdldkdkvirvlhvpvSFIE-----dPVRI---- 141
DSSP LE-----ELLL111hhhh1lee11111HHHH-----1LHH----

```

```

DSSP hhhhhhh11hhhhhhhhhhhhhhhh11111111111hhHLLLLL11111 269
Query dlqllegllldadlxptrsaciaifearaqhpwpprvatlphwplIYAGALEGLDhlela
ident |
Sbjct -----1RALRFAGRLN----f 153
DSSP -----hHHHHHHHLL----1

```

```

DSSP LLHHHHHHH----- 278
Query RTVDAAAQA-----
ident
Sbjct KLSRSTEKllkqavnlgllkeapgrlineiklalredrfleilelyrkyrvleeiegf 213
DSSP EELHHHHHHHHhhhh11hhhh11hhhhhhhhhh1111hhhhhhhhhh11hhhh11111

```

```

DSSP -----
Query ----- 278
ident

```

DSSP -----  
 Query ----- 278  
 ident  
 Sbjct vretykfmkfkglkskeelkkakenyevyrllkplhtsvllllmleelkekiklylekl 333  
 DSSP hhhhhhhhhhllhhhhhhhhhllllhhhhhhhhhllllhhhhhhhhhllhhhhhhhhhhhhh

DSSP -----hhhhhhhhhhhllll  
 Query -----vqrfvaridratkr 292  
 ident  
 Sbjct rkvklpkekieelkkelgerieelkreimnk 364  
 DSSP hllllllhhhhhhhhhllhhhhhhhhhhhhll

No 539: Query=mol1A Sbjct=3ifqA Z-score=5.0

[back to top](#)

DSSP -----L  
 Query -----A 1  
 ident  
 Sbjct aivhlinyqddaelastralpeltkllndedpvvtkaamivnqlskeasrralmgspqL 60  
 DSSP lhhhhhllhhhhhhhhhhllhhhhhhhhhllllhhhhhhhhhhhhhhhllhhhhhhhhllhhH

DSSP LLL----11LLLLHHHHHHHHHHHHHHLL-----11hHHHHHHHHHHHH-----  
 Query APY---ssPPTNLRSLRDLTQVAERQG-----vvfGRLQRHVAXIVV----- 41  
 ident | |  
 Sbjct VAAvvrvtmqNTSDLDARCTTSILHNLSHhregllaifksgGIPALVRMLSSPvesvlfy 120  
 DSSP HHHhhhhhllLLLLHHHHHHHHHHHHHHLLlhhhhhhhhhllHHHHHHHHHHLLlhhhhh

DSSP -----hhhhhllllllllllleEEEH-----HHHHHHHLLllllllllle  
 Query -----aqfaatlddtgapllLVKG-----GSSLELRRGipdsrtskdf 80  
 ident |  
 Sbjct aittlhnlllyqegakmavrldaglqkmvPLLNknpkflaITDCLQLL----- 170  
 DSSP hhhhhhhhhhllllhhhhhhllhhhhllHHHHllllhhhhhHHHHHHHH-----

DSSP eeeee1llhhhhhhhhhhhhhhllllleeeel1leel1llllllllleeeeeeeleee  
 Query atvarrdieliheqladagetgwegftaiftapeeiaapgxpvkprftaklsyrgrafa 140  
 ident  
 Sbjct ----- 170  
 DSSP -----

DSSP eeeeeee1llllllllleeeelhhhhhllllleeeelLHHHHHHHHHHHHhllllll  
 Query tvpievssveagnadqfdtltsdalglvgpaavavpcXTIPWQIAQKLHAVtavleepk 200  
 ident |  
 Sbjct -----aygnqeskliilaNGGPQALVQIMRNY----- 197  
 DSSP -----hllllhhhhhhhhLHHHHHHHHHHHHLL-----

DSSP 111LLHHHHHHHHHHHHLL--LHHHHHHHHHHHHhhhhhhhllllllLLLLllhhhhhhh  
 Query andRAHDLVDLQLEGLL--LDADLXPTRSACiaifearaqhpwPRVATlphwpliyag 258  
 ident | | |  
 Sbjct --sYEKLLWTTSRVLKVLsvCPSNKP AIVEAG-----gmqaLGKHLT----- 237  
 DSSP --1LHHHHHHHHHHHHHH11LLHHHHHHHHLL-----hhhhhHHHHH-----

DSSP hhllllllllllLHHHHHHHHHHHHHHHHLLLL-----  
 Query alegldhlelarTVDAAAQAVQRFVARIDRATKR----- 292  
 ident |  
 Sbjct -----sNSPRLVQNCLWTLRNLSDVATKqeglesvklilvnqlsvddvnlvtca 286  
 DSSP -----1LHHHHHHHHHHHHHHLLLLllllhhhhhhhllllllllhhhhhhh

DSSP -----  
 Query ----- 292  
 ident  
 Sbjct tgtlslntcnnskntltvtqnsgealihailragdkdditepavcalrhltsrhpeaem 346  
 DSSP hhhhhhhhllllhhhhhhhllllhhhhhhhhhhhllhhhhhhhhhhhhhllllllhhhh

```
ident
Sbjct aqnsvrlnygipaivkllnqpnqwpvlvkatiglrnlalcpahaplqeaaviprlvql 406
DSSP hhhhhhh111hhhhhhhhhh1111hhhhhhhhhhhhhh111hhhhhhhhhh111hhhhhhhh

DSSP -----
Query ----- 292
ident
Sbjct vkahqdaqrhvaagtqqpytdgvrmeievegctgalhilardpmrmeifrntiplfvq 466
DSSP hhhhhhhhhhh1111111111hhhhhhhhhhhhhh111hhhhhhhhhh111hhhhhh

DSSP -----
Query ----- 292
ident
Sbjct llyssveniqrvaagvlcelaqkdaadaidaegasaplmeillsrnegtatyaaavlfr 526
DSSP h11111hhhhhhhhhhhhhh111hhhhhhhhhh111hhhhhh11111hhhhhhhhhhhh

DSSP -----
Query ----- 292
ident
Sbjct isedknprkrvsveltnslf 546
DSSP 11111111hhhhhh111111
```

No 540: Query=mol1A Sbjct=4at8C Z-score=4.9

[back to top](#)

```
DSSP -----111111111hhhhhhhhhhhh111LLHHHHHHHHHHHHHHHHHHLL
Query -----aapyspntlrs1rdr1tqvaerqGVVFGRLQRHVAXIVVAQFAATL 48
ident
Sbjct hipdfylcemafprvkpapedtsfseallkrnqdlapNSAEQASILSLVTKINNVIDNL 60
DSSP 11111hhhh111111111111111hhhhhhhhhhhh111LLHHHHHHHHHHHHHHHHHH
```

```
DSSP L--LLLL1LLEEEHHhhhhhh111LLL-----1LLEEEEL--LHHHHHHHHHHH
Query T--DDTGaPLLVKGGsslelrrgipDSRT-----sKDFATVAR--RDIELIHEQLADAG 99
ident
Sbjct IvaPGTFvQIEEVRQV-----gsykKGTmtghnvADLVVILKi1PTLEAVAALGNKV 114
DSSP Hh1LLL1LLEEEEE-----1hhHLLL11111eEEEEEEEL111LLHHHHHHHHHHH
```

```
DSSP HH-LLLL--eeEEELLe111111111EEEEEEe11eEEEEEEEEELLLL111
Query ET-GWEG--ftAIFTAPEiaaagxpvpkRRFTAKLsyrgrAFATVPIEVSSVEAGNadq 156
ident
Sbjct ES1RAQDpsevLTMLTNE-----TGFEISS-----SDATVKILITVPPNL--- 155
DSSP HhhHHHL1111LEEEEL-----LEEEEL-----LLEEEEEEEELHHHH---
```

```
DSSP leeeelhhhh1111leeeel1hhhhhhHHHHHH111111111LLLhhhhhhhhhh
Query fdt1tsdalglvgpaavavpctipwqiaQKLHAVtavleepkaNDRAhd1vd1qlleg 216
ident
Sbjct -----rkldpelhdikvlqsalaaIRHARW-----feENAS----- 187
DSSP -----111111111hhhhhhhhhhHHHHH-----hhHLL-----
```

```
DSSP h11hhhhhhhhhhhhhhhh111111111111hhHHHHHHLLL-LLLL-----
Query 11ldadlxptrsciaifearaqhpwprvatlphwplIYAGALEGL-DHLE----- 267
ident
Sbjct -----QSTVKVLIRL1KDLRirfpgfep 210
DSSP -----LHHHHHHHHHHHHhhhh11
```

```
DSSP -----111LHHH-----hhhhHHHHhhHHHL---
Query -----larTVDA-----aaqavQRVvarIDRA--- 289
ident
Sbjct ltpwildllghyAVMnnpqrplalnvayrrclqilaagflpgsvGITDP-cESGNfrv 269
DSSP 11hhhhhhhhhhHHHL111111111hhhhhhhhhhhh111111111LLL-1LLL11h
```

```
DSSP -----
Query ----- 289
ident
Sbjct htvmtleqqdmvctaqtlvrilshggfrkilgqegdasyaseistwdgviptsekey 329
```



DSSP 111  
Query tkr 292  
ident  
Sbjct ekp 332  
DSSP 111

No 541: Query=mol1A Sbjct=5deeZ Z-score=4.9

[back to top](#)

```
DSSP 1111111111hhhhhhhhhhhhhhhhhh1LLLHHHHHHHHHHHHHHHHHLL--LLL--LLL
Query aapyspntnlrslrdrltqvaerqGVVFGRLQRHVAXIVVAQFAATL--TDDT--GAPL 56
ident
Sbjct -----QWERFLVPYRQAVEELKVKLKGIRtLYEYedDHSP 35
DSSP -----LHHHHLHHHHHHHHHHHHHHHHhHLL11LLL
```

```
DSSP -EEEEhHHHHhh1LLLL-----1LLEEEEEEL--LHHHHHHH
Query -LLVKggSSLElrrgIPDSR-----tSKDFATVARR--DIELIHEQL 95
ident | | | | |
Sbjct iEFVT--GRVK---PVASIlekarrrksiplheietmqDIAGLRIMCQFvDIQIVKEML 89
DSSP 1LEE--EEEL----LHHHHhhhhhh111111hh11LEEEEEELhhHHHHHHH
```

```
DSSP HHHhh111leEEEL1lee1111111LLEEEEEEL---1EEEEEEEEELL11
Query ADAGetgwegfTAIFTapeeiaapgxvKPRRFTAKLSYR---gRAFATVPIEVSSVEag 152
ident | | |
Sbjct FARK-----DFTVV-----RSYHLVLYPLQtvsGKHLVLEIQIRTLA-- 128
DSSP HLL-----LEEL-----LEEEEEEEEEEelleEEEEEEEEEEHH--
```

```
DSSP 1111leeeelhhhh1111leeeelhhhhHHHHHHHLL11111111hhhhhh
Query nadqfdtltsdalglvgvpaavavpcxtipwqiAQKLHAVTAvleepkandrahdldldq 212
ident
Sbjct -----mfWATIEHSLN----- 140
DSSP -----hhhHHHHHHHH-----
```

```
DSSP hhhhh11hhhhhhhhhhhhhhhh11111111LLLLLHhhhhhhhh111111111h
Query llegllldadlxptrsaciaifearaqhpwprVATLPHWpliyagaleglhdhlelartv 272
ident
Sbjct -----ykysGNIPEKV-----klrlqras 159
DSSP -----hh11LLLLHHH-----hhhhhhhh
```

```
DSSP hhhhhhhhhhhhhhhhh1111
Query daaaqavqrfvaridratkr 292
ident
Sbjct eaasrldeemseirgevqea 179
DSSP hhhhhhhhhhhhhhhhh11
```

No 542: Query=mol1A Sbjct=3hj1A Z-score=4.9

[back to top](#)

```
DSSP 1111111111hhhhhhhhhhhhhhhhhh1LLLHHHHHHHHHHHHHHHHL111111LLEEEE
Query aapyspntnlrslrdrltqvaerqGVVFGRLQRHVAXIVVAQFAATLtddtgaPLLVK 60
ident
Sbjct ---ghmnvakrefirgmmahyraslPPEHSVVIHELQKRVLIDIGMLA-----vNKAHVE 52
DSSP ---1111hhhhhhhhhhhhhhhh1LLLHHHHHHHHHHHHHHHH-----1LLEEEE
```

```
DSSP HHHhhhhhh1111111LLEEEEEEL-----LHHHHHHHHHHHHHLL111EE
Query GGsslelrrgipdsrtsKDFATVAR-----rDIELIHEQLADAGETGwegFT 107
ident | |
Sbjct LF--gshvsgfctphsdADISLTYRnfsplqgmervdeQNNKRMTRFGKEASAM---GM 107
DSSP EE--1hhhh1111111LLEEEEEEL111hh111hhhhHHHHHHHHHHHHHHH---LL
```

```
DSSP EEELLLEE1111111LLEEEEEEEEEE1leEEEEEEEEEl111111leeeelhhhh
Query AIFTAPEEiaapgxvKPRRFTAKLSYrgrAFATVPIEVSSveagnadqfdtltsdalgl 167
```



```

Query QIaQKLHAVtavleepkaNDRAhdldvlqlllegllldadlxptrsaciaifearaqhwp 243
ident
Sbjct FS-HTEKYI-----LNNH----- 226
DSSP LH-HHHHHH-----HLLL-----

DSSP 1111LLLL----hHHHHHHHHL-1LLLL-----1111hhHHHH----
Query prvaTLPH----wPLIYAGALE-gLDHL-----elartvdAAAQ---- 277
ident
Sbjct -gieKTCCessgakCCRKECLKmYLLEqkkefqeldafcsyhvktai fHMWTqdpqd 285
DSSP -1111LLL11111LLHHHHHHHHhhHHHHhhhhhh1hh1111hhhhhhhhHHHHh11lh

DSSP -----hhhhhhHHHH-----
Query -----avqrfvarIDR----- 288
ident
Sbjct sqwdprnlsscfdkllaffleclrteklthyfipkfnLFSqelidrkskeflskkieyer 345
DSSP hhh1hhhhhhhhhhhhhhhhhhhh111111111111LLL1111hhhhhhhhhhhhhhhh

DSSP ----1111
Query ----atkr 292
ident
Sbjct nngfpifdk 354
DSSP h111hhhh1

```

No 544: Query=mol1A Sbjct=5deeW Z-score=4.9

[back to top](#)

```

DSSP 1111111111hhhhhhhhhhhhHLLLLHHHHHHHHHHHHHHHHHLL--LLLL--LLL
Query aapyspntnlrslrdrltqvaeRQGVVFGRLQRHVAXIVVAQFAATL--TDDT--GAPL 56
ident
Sbjct -----DKQWERFLVPYRQAVEELKVKLKGIr tLYEYedDHSP 37
DSSP -----LLHHHHHHHHHHHHHHHHHHHHHHHHHHhhHLLL11LLL

DSSP -EEEEhhHHHHhh11LLL-----1LLEEEEEEL--LHHHHHHH
Query -LLVKggSSElrrgIPDSR-----tSKDFATVARR--DIELIHEQL 95
ident
Sbjct iEFVT--GRVK----PVASIl ekarrksiplheietmqDIAGLRIMCQFvdDIQIVKEML 91
DSSP 1LLEE--EEL----LHHHHhhhhhh1111hhhhhh11LEEEEEELlhHHHHHHHH

DSSP HHHHh111leEEEELLEEL1111111LEEEEEEEEL---LEEEEEEEEEEEL11
Query ADAGetgewgfTAIFTAPEElaapxpvkPRRF TAKLSYR---gRAFATVPIEVSSVEag 152
ident
Sbjct FARK-----DFTVVDQRDY-----iaSYHLVVLPLQtvs gEKHV LVEIQIRTLA-- 136
DSSP HLLL-----LLEEEELLL-----1LEEEEEEEEEEelleEEEEEEEEEEHH--

DSSP 1111leeeelhhhh11111leeeelhhhhHHHHHHHLL1111111111hhhhhh
Query nadqfdtltsdalglvgvpaavavpcxtipwqiAQKLHAVTAVleepkandrahldldlq 212
ident
Sbjct -----mfWATIEHSLNY----- 149
DSSP -----hhHHHHHHHHH-----

DSSP hhhh11hhhhhhhhhhhhhhhh1111111111111111111111111111111111h
Query llegllldadlxptrsaciaifearaqhwpwppRVATLPHwpliyagalegldhlelartv 272
ident
Sbjct -----kySGNIPEKV-----klrlqras 167
DSSP -----h1111111111-----hhhhhhhh

DSSP hhhhhhhhhhhhhhh1111
Query daaaqavqrfvaridratkr 292
ident
Sbjct eaasrldeemseirgevqea 187
DSSP hhhhhhhhhhhhhhh1111

```

No 545: Query=mol1A Sbjct=4i27A Z-score=4.9

```

DSSP -----
Query ----- 0
ident -----
Sbjct avkkisqyacqrtrtlnnynqlftdaldi laendelrenegsclafmrassvkslpfpi 60
DSSP 11111111hhhh11111111hhhhhhhhhhhhhhhh1111hhhhhhhhhhhhhh111111

DSSP -----
Query ----- 0
ident -----
Sbjct tsmkdteqipclgdkvkssiiegiiedgesseakavlnderyksfkflftsfgvglktaek 120
DSSP 11hhhh11111111hhhhhhhhhhhhhh1111hhhhhh11hhhhhhhhhh111111hhhhhh

DSSP -----1111111111hhhhhhhhhhhhhh1111hhhhhhHHHHHHHHHHHHHLL-LLLL1LL
Query -----aapyspsptnlrslrdrltqvaerqgvfgrlqRHVAXIVVAQFAAT-LTDDtGA 54
ident -----|
Sbjct wfrmgfrtlskiqsdkslrftqmkgaflyyedlvscvNRPEAEAVSMLVKEaVVTF1PD 180
DSSP hhh11111hhhhhh11111111hhhhhhhh1hhhh11eEHHHHHHHHHHHHHHHHH1LL

DSSP LLEEEHHHHHHHHhh111111LLLEEEEL-----1LHHHHHHHHHHHHhh111
Query PLLLVKGGSSLELrrgipdsrTSKDFATVAR-----rDIELIHEQLADAGetgwe 104
ident | | | | |
Sbjct ALVTMTGGFRRGK-----mTGHVDVFLITspeatedeeqLLHKVTDfWKQG----- 228
DSSP LEEELHHHHLLL-----1EELLEEEEEE11111hhhhhhHHHHHHHHHHHLL-----

DSSP leeeEELLEELLLL-----1LLEEEEEEEEE-----LLEEEEEEEEE
Query gftaIFTAPEEIAAPG-----xPVKPRRF TAKLSY-----RGRAFATVPI 144
ident -----| |
Sbjct ----LLYCDILESTFekfkqpsaldHFQKCFLLKLDHgrvhseksqgqEGKGWKAIRV 284
DSSP ----LEEEEEELLLL1111111111LLEEEEEEEEEHHhh1111111111LLEEEEEEEE

DSSP EEEEL-LLLL1111eeeeelhhhh111111eeeeel1HHHHHHhhhhhh111111111
Query EVSSV-EAGNadqfdt1tsdalglvgvpaavavpcxtiPWQIaqklhavtavleepkand 203
ident -----
Sbjct DLVMCPYDRR-----aFALL-----gw 301
DSSP EEEEL1HHHH-----hHHHH-----hh

DSSP 11HHHHHHH-----hhhh11hhhhhhHHHHhhhhhh1111LLLLL111
Query raHDLVDLQ-----1leg11dadlxptRSACiaifearaqhpWPPRVAtlp 250
ident -----
Sbjct tgSRQFERDlrryatherkmmldnhalydrtrkvf1EAES-----eeEIFAHLGLD--- 352
DSSP h1LHHHHHHhhhhhhhhhhlee1111ee1111ee1111LLE-----hhhhHHLLL---

DSSP 1hhhhhhhh1111111111hhhhhhhhhhhhhhhh1111
Query hwpliyagalegldhlelartvdaaaqavqrfrvaridratkr 292
ident -----
Sbjct -----yiepwerna 361
DSSP -----11hhhh11

```

No 546: Query=mol1A Sbjct=3wfrF Z-score=4.9

[back to top](#)

```

DSSP 1111111111hhhhhhhhhhhhhh1111hhhhhhhhhhHHHHHHHHLLL11LLEEEEE
Query aapyspsptnlrslrdrltqvaerqgvfgrlqrhvaxIVVAQFAATLTDDtGAPLLLVK 60
ident -----|
Sbjct -----xxlNfyLSYFDDVAKVLP--REHYCFIV 27
DSSP -----11111111LHHHHHHHLL--LLEEEEE

DSSP HHHHHHHHHLLL111111LLEEEELLLHHHHHHHHHHHHhh1111eeEELLEEL1111
Query GGSSLELRRGIPdsrtsKDFATVARRDIELIHEQLADAGetgwegftaIFTAPEEIAapg 120
ident | | | | |
Sbjct GGWVRDRILGEP-vgynIDVDFTTADPVELAKNFAKRI-----GGHFFVFE---- 73
DSSP LHHHHHHHHLLL-111eEEEEELLLHHHHHHHHHHHH-----LLEEEEL----

DSSP 11LLEEEEEEEe11eEEEEEEEEEL-----LLL-----111LEEE
Query xpVKPRRF TAKLSyrgrAFATVPIEVSSV-----EAGN-----adqFDTL 160

```

DSSP --LLEEEEEEL-----LLEEEEEEEEL1111hHHHHhhhhh11111111eeehHHHL

DSSP eelhhhh11111111eeeeeLHHH-----hHHHHHHHHL11111111LLLHhhh  
Query tsdalglvgvpaavavpcxTIPW-----qiaqklhAVTAvleepkaNDRAHdlv 209  
ident |  
Sbjct -----tiVYDPtggikdleqglrrpvsieNLKR-----dPVRVL--- 160  
DSSP -----11EELL11hhhhh111e1111hhHHHH-----1LLHHH---

DSSP hhhhhhh11hhhhhhhhhhhhhhhhhh11111111111111hhHHHHHHLLL1LLL  
Query dlqllegllldadlxptrsaciaifearaqhpwpprvatlphwplIYAGALEGLDhLELA 269  
ident | |  
Sbjct -----RGFRIAIEKN-LQLT 174  
DSSP -----HHHHHHHHLL-LEEL

DSSP 11hHHHHHHHHH-----  
Query rtvDAAAQAVQR----- 281  
ident |  
Sbjct ---EDFYEFVKEdprivlksaverithelfkimkektahkvirelyeygvleaiipeigr 231  
DSSP ---HHHHHHHHH1hhhhh11hhhhhhhhhhhh111hhhhhhhhhh11hhhhh1hhhhh

DSSP -----  
Query ----- 281  
ident -----  
Sbjct lrevkdp1dehtlktleyleqviedrakylsaellenfgkkrvlgefthdvellkwalgh 291  
DSSP h111111hhhhhhhhhhhhhhhhhh111111111111111111111111hhhhhhhhhh11

DSSP -----  
Query ----- 281  
ident -----  
Sbjct digkptfavtfyehdkvgaivreigerlrwgdeatefvaklvrhhlrpfllreafkkg 351  
DSSP 1111111111111111hhhhhhhhhhhhhh1111hhhhhhhhhhhh111hhhhhhhhhh11

DSSP -----  
Query ----- 281  
ident -----  
Sbjct elkrngmanfwrecgdiaphlfl1siadamasgdeeedikalmetiaefsnrnemkxx 411  
DSSP 111hhhhhhhhhh1111hhhhhhhhhhhh1111hhhhhhhhhhhhhhhhhh111111

DSSP -----hHHHHH1111  
Query -----fvaridratkr 292  
ident -----  
Sbjct xxxxxxxxxxxxxxxxxxxxxxxxxxxxxx 439  
DSSP 1hhhhhhhhhh111hhhhhhhhhh11

No 547: Query=mol1A Sbjct=1qz7A Z-score=4.9

[back to top](#)

DSSP -----LLL-----  
Query -----AAPY----- 4  
ident -----  
Sbjct yqddaelatraipeltkl1ndedqvvvkaavmvhqlskkeasrhaimrspqMVAivrt 60  
DSSP 111hhhhhhhhhhhh11111111hhhhhhhhhh1111hhhhhhhh11hhHHHHHHhh

DSSP 11LLLHHHHHHHHHHHHHHLL-----11hHHHHHHHHHH-----  
Query ssPPTNLRSLRDRLTQVAERQG-----vvfGRLQRHVAXIV----- 40  
ident | |  
Sbjct mqNTNDVETARCTAGTLHNLShregllaifksgGIPALVKMLGSpvdsvlfyaittlhn 120  
DSSP hhLLLLLHHHHHHHHHHHHLL1hhhhhhhh11HHHHHHHHHH11hhhhhhhhhhhh

DSSP -----hHHHHH1111111111eEEE-----HHHHHHHHL111111111111111111  
Query -----vaqfaat1tddtgap11LVKG-----GSSLELRGipdsrtskdfatvarrd 87  
ident |  
Sbjct 111hqegakmavrlagglqkmvALLNktnvkflaITTDCLQIL----- 163  
DSSP hhhh111hhhhhhhh1hhhhhhHHHH111hhhhHHHHHHHH-----



DSSP hhhhhhhhhllllleeeellleellllllllleeeeeeeleeeeeeeeeelll  
 Query heqladagetgwegftaiftapeeiaapgxpvrprftaklsyrgrafatvpievssvea 151  
 ident  
 Sbjct ----- 159  
 DSSP -----

DSSP 11111leeeelhhhh11111leeeelLHHHHHHHHHHHHh11111111LLHHHHHH  
 Query gnadqfdtltsdalglvgvpaavavpcXTIPWQIAQKLHAVtavleepkanDRAHDLVDL 211  
 ident | |  
 Sbjct -----aygnqeskliilaSGGPQALVNIMRTY-----TYEKLLWTT 195  
 DSSP -----h111hhhhhhhhhhLLHHHHHHHHHHHL-----LLHHHHHHHH

DSSP HHHHHHL--LHHHHHHHHHHHHhhhhhhhh11111LLLLL111hhhhhhhhhh11111111  
 Query QLLEGLL--LDADLXPTRSACiaifearaqhpwpPRVATlphwpliyagalegldhlela 269  
 ident | | |  
 Sbjct SRVLKVLsvCSSNKPAIVEAG-----gmqa1GLHLT----- 226  
 DSSP HHHHHHH11LLHHHHHHHHHL-----h111hhhhHLLL-----

DSSP 1LHHHHHHHHHHHHHHHHHHHL-----  
 Query rTVDAAAQAVQRFVARIDRATKR----- 292  
 ident |  
 Sbjct dPSQLVQNCLEWTLRNLSDAATKqegmegllgtlvql1gsddinvvtcaagilsnltcnn 286  
 DSSP 1LLHHHHHHHHHHHHHHHHHHHL1111hhhhhhhhhh11111hhhhhhhhhhhhhhhh111

DSSP -----  
 Query ----- 292  
 ident  
 Sbjct yknkmmvcvqvggiealvrtv1ragdreditepaicalrh1tsrhqeaemaqnavrlhygl 346  
 DSSP hhhhhhhhh11hhhhhhhhhhhh111hhhhhhhhhhhh111111hhhhhhhhhh111h

DSSP -----  
 Query ----- 292  
 ident  
 Sbjct pvvkl11hppshwplikatvglirn1alcpahaplreqgaipr1vqllvrahqdtqr1rt 406  
 DSSP hhhhh111111hhhhhhhhhhhhhh111hhhhhhhhhh11hhhhhhhhhhhhhhhh111

DSSP -----  
 Query ----- 292  
 ident  
 Sbjct sqfvegvrmeeeivegctgalhilardvhnrvir1rglntiplfvqllyspieniq1rvaagv 466  
 DSSP 1111111hhhhhhhhhhhhhh111hhhhhhhhhh111hhhhhh111111hhhhhhhhhh

DSSP -----  
 Query ----- 292  
 ident  
 Sbjct lcelaqdkeaaeiaeaegatapl1tellsrnegvatyaav1frmse 513  
 DSSP hhhhh11hhhhhhhh1111hhhhhh11111hhhhhhhhhhhhhh1

No 549: Query=mol1A Sbjct=2ii2A Z-score=4.8

[back to top](#)

DSSP -----  
 Query ----- 0  
 ident  
 Sbjct ygdaipevkaileakneeelvtfts1rwsaeer1eltqf1dttglefia1fkkcikngpy 60  
 DSSP 111hhhhhhhhhh111hhhhhhhh111hhhhhhhhhhhhhh111hhhhhhhh111hh

DSSP -----111111111hhhhhhhhHHHHHHLLL1HH  
 Query -----aapyssptnl1rslrdr1TQVAERQGVvFG 30  
 ident | |  
 Sbjct edvmalgwdcn1sarv1vikkamknvndfraih1dv1iatpder1k1aQAYKEKTGN-DL 119  
 DSSP hhhhhhh11hhhhhhhhhhhh1111hhhhhhhh111hhhhhhhhHHHHHHLL-LH





DSSP hhhh111111eeeee11hhhhhhHHHHHHh111111LLLLhhhhhhhhhh11hhhh  
Query alglvgvpaavavpcxtipwqiaQKLHAVtavleepkaNDRAhdldlqllegl1ldadl 223  
ident  
Sbjct -----nsiaIRCSEL-----LYIY----- 277  
DSSP -----1hhhhHHHHH-----HHHH-----

DSSP hhhhhhhhhhhhh111111111111LHHHHHHHHHL-1LLL-----  
Query xptrsaciaifearaqhpwprvatlphWPLiYAGALE-gLDHL----- 266  
ident  
Sbjct -----gCLDPPrVRALVFslRCWArvhgltnsvpgtwitn 311  
DSSP -----hHHLHhHHHHHHhHHHHhh11111111111h

DSSP --1111LHHHHHHH-----  
Query --elarTVDAAAQA----- 278  
ident  
Sbjct fs1tmmIMFFLQKRspiiptldqkeladekdkhviggycsfvsdlskikptkntetl 371  
DSSP hhhhhhhHHHHHLL111111hhhhhh111111leeeleee111111111111111h

DSSP -----hhhhhhhhHLLL-----  
Query -----vqrfvaridRATKR----- 292  
ident  
Sbjct dellcdfyqyfgnfdfrknslnlrkqkevNKPESsplyiwnpfeqdlnskvnvqpqlek 431  
DSSP hhhhhhhhhhh111111leee111leeeLLLLL11111111111111111hhhhhh

DSSP -----  
Query ----- 292  
ident  
Sbjct fvamaresawilqkedktqminkepwglaavlipf 467  
DSSP hhhhhhhhhhhhh11hhhhhh111111hhhh1111

No 551: Query=mol1A Sbjct=4at8B Z-score=4.8

[back to top](#)

DSSP 111111111hhhhhhhhhhhh11LHHHHHHHHHHHHHHHHHLL---LLL-LLL  
Query aapyspntnlrslrdrltqvaerqGVVFGRLQRHVAXIVVAQFAATL---TDDT-gAPL 56  
ident  
Sbjct -----rifvnddrhvmakhssvyPTQEELEAVQNMVSHTERALKAVsdwIDEQekRTL 53  
DSSP -----11hhhhhhhhhhhh11LHHHHHHHHHHHHHHHHHHhhHLL11LLE

DSSP EEEHhHHHHhh111LLL-----LLEEEEL--LHHHHHHHHHHHHHLL--LEE  
Query LLVKgSSElrrgipDSRT-----sKDFATVAR--RDIELIHEQLADAGETGW--EGFT 107  
ident  
Sbjct RGVm--RVGL----vaKGLL1kgdldLELVLLCKekPTALLDKVADNLAIQLTtvTEDK 107  
DSSP EEEE--ELHH---hhHLLL1111eEEEEEL11LHHHHHHHHHHHHHHhh1LLL

DSSP EEELLEEEL11111111EEEEEe1leeEEEEEEELLLL1111eeeee1hhhh  
Query AIFTAPEElaapgxpvkprRRFTAKLSyrgraFATVPIEVSSVEAGnadqfdtltaldagl 167  
ident  
Sbjct YEILQSVDD-----AAIVIKNT--kepPLSLTIHLTSPVVR-----eemekvag 149  
DSSP LEEEEEELLL-----LEEEEL--11LLEEEEEELHHH-----hhhh111

DSSP 11111eeeee11hhhhhhHHHHHh11111111LLHhhhhhhhhhh11hhhhhh  
Query vgvpaavavpcxtipwqiaQKLHAVtavleepkanDRAhdldlqllegl1ldadlxptr 227  
ident  
Sbjct edppdvldrqkclaa1aslRHAKWF-----qARAN----- 179  
DSSP 11111111hhhhhhhhhhHHHHH-----hHLL-----

DSSP hhhhhhhhh111111111111HHHHHHHHHL1LLL-----111L  
Query saciaifearaqhpwprvatlphWPLIYAGALEgLDHL-----elarT 271  
ident  
Sbjct -----gLKSCVIVIRVIRDLCtrvptwglrgwplellcekS 216  
DSSP -----1LLLHHHHHHHHHHHHhh11hhhhhh11hhhhhhhh

DSSP HHH-----hhhhHHHH-----HHHHLLL-----







```

Query ----- 0
ident
Sbjct qlqglphfgehssrvvqellehgvceevervrrseryqtmklftqifgvgtadrawyre 120
DSSP hhl111111hhhhhhhhhhhhhh111hhhhhhhhhhhhhhhhhhhhhh111111hhhhhhhhhh

DSSP 111111111hhhhhhhhhhhhhh111hhhhhhHHHHHHHHHHHHHLLL-11LLEEEE
Query aapyspntnlrslrdrltqvaerqgvfgrlqRHVAXIVVAQFAATLTD-dtGAPLLLV 59
ident
Sbjct glrtlddlreqpqltqqkaglhqhqdlstpvLRSDVDALQQVVEEAVGgalPGATVTL 180
DSSP 1111hhhh11hhh11hhhhhhhhhhhh111eEHHHHHHHHHHHHHHhh1LLEEEEE

DSSP EHHHHHHhh11111LLEEEEEEL-----1LHHHHHHHHHHHHhh1111eeeEEL
Query KGSSELELrrgipdsrTSKDFATVAR-----rDIELIHEQLADAGetgwegftaIFT 111
ident
Sbjct TGGFRRGK-----1QGHVDVFLIThpkqgeagLLPRVMCRLQDQG-----LIL 224
DSSP LHHHLLL-----1EELLEEEEE1111111HHHHHHHHHHLL-----LEE

DSSP LLEe111111LLEEEEEEEEEELLEeEEEEEEEEEL-LLLL1111eeee1hhhh11
Query APEeiaapgxPKPRRFATKLSYRGRaFATVPIEVSSV-EAGNadqfdtltsdalglvgv 170
ident
Sbjct YHQ-----FERSFCIFRLPQPGS-WKAVRVDLVVApVSQF----- 258
DSSP ELL-----LLEEEEEEEEEELLE-EEEEEEEEEL1HHHH-----

DSSP 111eeeee1hhHHHHhhhhhh1111111111HHHHHH-----hh
Query paavavpcxtiPWQIaqlhavlaveepkandraHDLVDLQ-----11 214
ident
Sbjct -----pFALL-----gwtgSKLFQRElrrfsrkeglwlnshgl 292
DSSP -----hHHHH-----hhh1LHHHHHHhhhhhhhh1lee111e

DSSP hhh11HHHHhhHHHHhhhhhh1111L1111111111hhhhhhhh1111111111hh
Query egl1ldADLXptRSACIaifearaqhpWPPRVAtpwhpliyagalegldhlelartvda 274
ident
Sbjct fdpeqkTFFQ--AASEE-----difRHLGLE----- 316
DSSP ee1111EELL--LLLHH-----hhHHLLL-----

DSSP hhhhhhhhhhhhh1111
Query aaqavqrfvaridratkr 292
ident
Sbjct -----ylppeqrna 325
DSSP -----111hh111

```

No 556: Query=mol1A Sbjct=3b0xA Z-score=4.8

[back to top](#)

```

DSSP ----- 0
Query -----
ident
Sbjct mrnqelarifeeiglmseflgdnprvrayqaartlyldtpieeiaekgkealmelpg 60
DSSP 11hhhhhhhhhhhhhhhh111hhhhhhhhhhhhhhhhhhhh1111hhhh11hhhh1111

DSSP ----- 0
Query -----
ident
Sbjct vgpdaekileflrtgkvrkheelsrkvprgvlevmevpgvgtkarllyeglgidslek 120
DSSP 11hhhhhhhhhhhh11hhhhhhhh11hhhhhh111111hhhhhhhh111111hh

DSSP -----111111111hhhhhhhhhhhh1111hhHHHHHHHHHHHHHLLL1111
Query -----aapyspntnlrslrdrltqvaerqgvfgrlqRHVAXIVVAQFAATLTDdtga 54
ident
Sbjct lkaaldrgdltrlkgfpkraerireglalaqaagkRRRPLGAVLSLARSLLEAIRAlpgv 180
DSSP hhhhh11hh11111hhhhhhhhhhhh111EEHHHHHHHHHHHHHH1111

DSSP 1LEEEHHHHHHhh11111LLEEEEEEL-----1LHHHHHHHHhhhh1111eee
Query pLLLVKGSSELELrrgipdsrTSKDFATVAR-----rDIELIHEQLAdagetgwegftai 109
ident

```

DSSP ELLLEEL11111LLLEEEEEEEeelleeeEIEEEEEEL-LLL111leeeelhhhl  
Query FTAPEElaapgxPKPRRFTAKLsygrafaTVPIEVSSV-EAGNadqfdlttsdalglv 168  
ident | |  
Sbjct KEVYAKG-----KERATVFLKN-----GLQVDRVVPESY----- 252  
DSSP EEEEEEL-----LLEEEEEELL-----LLEEEEEEE1HHHH-----

DSSP 1111leeeee1hHHHHhhhhhhhh1111111111HHHHHHH-----hhh  
Query gpaavavpcxtiPWQlaqlhvtavlepkandraHDLVDLQ-----lleg 216  
ident  
Sbjct -----gAGLQ-----yltgSAHSIRlralaqekglklseyg 284  
DSSP -----hHHHH-----hhh1LHHHHHHhhhhhh11leelle

DSSP h11hhhhhhhhHHHHhhhh111LLL11111hhhhhhhh111111111hhHH  
Query 11ldadlxptrsACIAifearaqhPWPPrvatlphwpliyagaleglhdhlelartvdaAA 276  
ident  
Sbjct vfrgekriagetEEEV-----yaALGL-----pwippplredQ 317  
DSSP eeelleee111HHHH-----hhHLLL-----1111hhhl11L

DSSP HHHHHH-----  
Query QAVQRF----- 282  
ident |  
Sbjct GEVEAAlegrlpkllelpqvkglqvstysdgqntleelweaaktmgyrylavtdhsa 377  
DSSP LHHHHHh1111111hhhl1leeeel111111111hhhhhhhhhh111leeeeee111

DSSP -----  
Query ----- 282  
ident  
Sbjct vrvaggspeealkrvgeirrfnethgppyllagaevdihpdgtldypdwlreldlv 437  
DSSP 1111111hhhhhhhhhhhhhhhh11leeeeee111111111hhhh111leee

DSSP -----  
Query ----- 282  
ident  
Sbjct svhsrfnlpkadqtkrllkalenpfvvhlahptarllgrrapieadweavfqakekgva 497  
DSSP e1111111hhhhhhhhhh111111lee111111111111111hhhhhhhhhh11le

DSSP -----  
Query ----- 282  
ident  
Sbjct veidgyydrmdlpddlarmaygmglwislstdahqtdhrlfrelavgtaqrawigpervl 557  
DSSP eeee11111111hhhhhhhh111leee11111hhhhhhhhhhhhhh111111h

DSSP -----hHHHH1111  
Query -----varidratkr 292  
ident  
Sbjct ntl dyedllswlkarrgv 575  
DSSP hhhhhhhhhhh11111

No 557: Query=mol1A Sbjct=3b0yA Z-score=4.8

[back to top](#)

DSSP -----  
Query ----- 0  
ident  
Sbjct mrnqelarifeeiglmseflgdnprvrayhqaartlyldtpieeiaekgkealmelgp 60  
DSSP 11hhhhhhhhhhhhhhhh111hhhhhhhhhhhhhhhh111hhhh111hhhh11111

DSSP -----  
Query ----- 0  
ident  
Sbjct vgpdlakileflrtgkvrkheelsrkvprgvlevmevpgvpgktarlllyeglgidslek 120  
DSSP 11hhhhhhhhhhhh11hhhhhhhh11hhhhhhhh1111hhhhhhhhhh11111hh

```

ident      |
Sbjct     lkaaldrhdltrlkgfgpkraerireglalaqaagkRRRPLGAVLSLARSLLEAIRAlpgv 180
DSSP      hhhhhhh1hhh111111hhhhhhhhhhhhhhhh11LEEEHHHHHHHHHHHHHHH1111

DSSP      LEEEEHHHHHHhh11111LLLEEEEL-----LHHHHHHHHhhhhhh1111eeee
Query     pLLLVKGSSLELrrgipdsrTSKDFATVAR-----rDIELIHEQLAdagetgwegftai 109
ident      |           |           |
Sbjct     eRAELCGSARRYK-----dTVGDLDLFLVAsregerAVEGFVRLPQ-----v 221
DSSP      LEEELHHHHLLL-----LEELEEEEEE111hhHHHHHHLLL-----e

DSSP      ELLLEEL11111LLLEEEEEEEelleeeeeEEEEEEEL-LLLL11111eeee1hhhl
Query     FTAPEEIaapgxpVKPRRFTAKLSyrgrafaTVPIEVSSV-EAGNadqfdtltsdalglv 168
ident      |           |           |
Sbjct     KEVYAKG-----KERATVFLKN-----GLQVDLRVVpPESY----- 252
DSSP      EEEEEEL-----LLEEEEEEL-----LLEEEEEEE1HHHH-----

DSSP      11111eeeeel1hHHHHhhhhhhhh1111111111HHHHHHH-----hhh
Query     gvpaaavapcxtiPWQIaqk1havtavleekandraHDLVDLQ-----lleg 216
ident      |           |
Sbjct     -----gAGLQ-----y1tgSDAHSIRlr1alaqekg1klseyg 284
DSSP      -----hHHHH-----hhhlLHHHHHHhhhhhh11leele

DSSP      h11hhhhhhhhHHHHhhhh111LLL11111hhhhhhhh111111111hhHH
Query     l1ldadlxptrsACIAifearaqhPWPPrvatlphwplyagalegl dhlelartvdaAA 276
ident      |
Sbjct     vfrgekriagetEEEV-----yaALGL-----pwippplredQ 317
DSSP      ee11eeee11HHHH-----hhLLL-----1111hh11LL

DSSP      HHHHHH-----
Query     QAVQRF----- 282
ident      |
Sbjct     GEVEAAlegrlpkllelpqvkgdlqvshstysdgqntleelweaaktmgyrylavtdhsa 377
DSSP      LHHHHhh111111hhhh1leeeee111111111hhhhhhhhhh1111111111

DSSP      -----
Query     ----- 282
ident      |
Sbjct     vrvaggpspeealkrvgeirrfnethgppylagaevdihpdgtdydpdvlreldl1v 437
DSSP      11111111hhhhhhhhhhhhhhhhhh111111111111111hhhh111111111

DSSP      -----
Query     ----- 282
ident      |
Sbjct     svhsrflnlpkadqtkrllkalenpfvvhlahptarl1grrapieadweavfqkakekgva 497
DSSP      e11111111hhhhhhhhhhhhhh11111111111111111111111111111111111

DSSP      -----
Query     ----- 282
ident      |
Sbjct     veidgydrmdlppddlarmaygmg1wislstdahqtdh1r1rfmelavgtaqrawigpervl 557
DSSP      eeee1111111111hhhhhhhh11111111111111111111111111111111111h

DSSP      -----hhh1111
Query     -----varidratkr 292
ident      |
Sbjct     ntlldyedllswlkarrgv 575
DSSP      hh11hhhhhhhh11111

```

No 558: Query=mol1A Sbjct=1jqra Z-score=4.8

[back to top](#)

```

DSSP      111111111hhhhhhhhhhhhhh111hhhhHHHHHHHHHHHHL-----1LLL
Query     aapysspptnlrslrdrltqvaerqgvfgrlqRHVAXIVVAQFAATL-----tdDTG 53
ident      |
Sbjct     -----m1TLIQGKKIVNHLRSRlafeynglIKI 29

```

DSSP LL-EEEEHHHHHHhh111111LLLLEEEEEL-----1LHHHHHhhhHHHHh111  
 Query AP-LLLVKGGSSLELrgipdsrTSKDFATVAR-----rDIELIHeqLADAGetgwe 104  
 ident | | | | | | | | | |  
 Sbjct LSkNIVAVGSLRREE-----kMLNDVDLLIIvpekk11khVLPNIR---IKGL----- 74  
 DSSP LHHHEEELHHHLLL-----IEELLEEEEEe11111hhhHLLLEE---ELL-----

DSSP lEEEELLEEL111111LLLLEEEEEEEEe1leeEEEEEEEEELLLLL111EEEEeh  
 Query gftaIFTAPEElaapgxpkPRRFTAKLSyrgaFATVPIEVSSVEAGNAdqfdltsda 164  
 ident | | | | | | | | | |  
 Sbjct ---SFSVKVCG-----ERKCVLFIEWE----KPTYQLDLFTALAEK----- 109  
 DSSP ---EEEEEL-----LLEEEEEEL-----LEEEEEEEEEELLHH-----

DSSP hhh11111eeeeellhHHHHHHhhhhh1111111111hHHHHH-----  
 Query lglvgvpaavavpcxtiPWQIAQklhavtavleepkandrahDLVDLQ----- 212  
 ident | | | | | | | | | |  
 Sbjct -----pYAlFHF-----tgPVSYLiriraalkknyk 136  
 DSSP -----hHHHHH-----hLHHHHHHhhhhhh11lee

DSSP -hhhhhh1hHHHHhhhhhhhhhhhh1111LLLL1111hhhhhhhh1111111111  
 Query -llegllldADLxptrsaciaifearaqpWPPRVat1phwpliYAGaleglDhlelart 271  
 ident | | | | | | | | | |  
 Sbjct lnqyglfknQTLV---plkittekelikeLGFTY----- 167  
 DSSP eelleeeLEEL---111111hhhhhHLLL-----

DSSP hhhhhhhhhhhhhhh1111  
 Query vdaaaqavqrfvaridratkr 292  
 ident | | | | | | | | | |  
 Sbjct -----ripkkr1 174  
 DSSP -----lhhhl

No 559: Query=mollA Sbjct=3wfrE Z-score=4.8

[back to top](#)

DSSP 11111111hhhhhhhhhhhh1111hhhhhhhhhhHHHHHHHLLL1111LLEEE  
 Query aapysspntnlrslrdrltqvaerqgvfgrlqrvaxIVVAQFAATLTDdtGAPLLLVK 60  
 ident | | | | | | | | | |  
 Sbjct -----xxxlnfyLSYFDDVAKVLP--REHYCFIV 28  
 DSSP -----11111111LHHHHHHHLL--LLEEE

DSSP HHHHHHHHLLL1111LLEEEEELLLHHHHHHHHHHhh1111eEELLEEL1111  
 Query GGSSLELRRGIPdsrTSKDFATVARRDIELIHEQLADAGetgwegftaIFTAPEElaap 120  
 ident || | | | | | | | | | |  
 Sbjct GGWVRDRILGEP-vgynIDVDFLTADPVELAKNFAKRI-----GGHFFVFE---- 74  
 DSSP LHHHHHHHLLL-11leEEEEELLLLHHHHHHHHHH-----LLEEEEL---

DSSP 11LLEEEEEEEeelleEEEEEEEEEL----LLL-----1111EEE  
 Query xpVKPRRFTAKLSyrgaFATVPIEVSSV----EAGN-----adqfdTL 160  
 ident | | | | | | | | | |  
 Sbjct --PTIASVVLHL----PPYRFRDFSPkkgd1EKALiedlkerdfatanaiavnlDDVL 127  
 DSSP --LLEEEEEEEL-----LLEEEEEEL1111hHHHHhhhh11111hhleeehhHHL

DSSP Eelhhhh111111eEEELHHH-----hhhhhhHHHL11111111LLLHHhh  
 Query TsdalglvgvpaavavpcxTIPW-----qiaqklhAVTAveepkaNDRAHdlv 209  
 ident | | | | | | | | | |  
 Sbjct S-----tiVYDPtgikdleqllrpvsieNLKR-----dPVRVL--- 162  
 DSSP L-----11EELL1hhhhhh1lee1111hhHHH-----1LHHH---

DSSP hhhhhhh11hhhhhhhhhhhhhhhh11111111111hhHHHHHLLL11111  
 Query dlqlllegllldadlxptrsaciaifearaqpWpprvatlphwpliYAGALEGLDhlela 269  
 ident | | | | | | | | | |  
 Sbjct -----RGFRIAIEKN----1 173  
 DSSP -----HHHHHHHLL----1

DSSP LLHHHHHHHHH-----



Sbjct QLTEDFYEFVKEdprivksaverithelfkimkektahkvirelyeygvleaiipeigr 233  
DSSP EELHHHHHHHHH1h1hhhh11hhhhhhhhhh111hhhhhhhhhh11hhhhhhhhhh11hhhh1h1hhhh  
  
DSSP -----  
Query ----- 281  
ident  
Sbjct lrevkdp1dehtlktleyleqviedrakylsaellenfgkkrvlgeftdvellkgalfh 293  
DSSP hh11111hhhhhhhhhhhhhhhh1h1hhhh11hhhh1111111111hhhhhhhhhh11  
  
DSSP -----  
Query ----- 281  
ident  
Sbjct digkqptfayehdkvgaqvireigerlrwgdeatefvaklvrrh1rpf1lreafkkgel 353  
DSSP 1111111111hhhhhhhhhhhhhhhh111hhhhhhhhhhhhhh11hhhhhhhhhh11111  
  
DSSP -----  
Query ----- 281  
ident  
Sbjct krrgmanfwrecgdiaphlfl1siadamasgdeeedikalmetiaelesfnrnmkxxxx 413  
DSSP 1hhhhhhhhhh1111hhhhhhhhhhhhhh11hhhhhhhhhhhhhhhhhh111111hh  
  
DSSP -----h1hhhhhh1111  
Query -----fvaridrattr 292  
ident  
Sbjct xxxxxxxxxxxxxxxxxxxxxxxxxx 439  
DSSP hhhhhhhhhhh1hhhhhhhhhh1

No 560: Query=mol1A Sbjct=3wfgG Z-score=4.8

[back to top](#)

DSSP 111111111hhhhhhhhhhhhhh111hhhhhhhhhhHHHHHHHHLLL11LLLEEEE 60  
Query aapyspntnlrs1rdrltqvaerqgvfgrlqrhvaxIVVAQFAATLTDdtGAPLLLVK  
ident  
Sbjct -----xxxlnfyLSYFDDVAKVLP--REHYCFIV 27  
DSSP -----111111111LLHHHHHHHLL--LLLEEEE

DSSP HHHHHHHHLLL11111LEEEEEELLLLHHHHHHHHHHHHh1111eeeEELLLEE1111 120  
Query GGSSLELRGIPdsrtsKDFATVARRDIELIHEQLADAGEtgwegftaIFTAPEEiaapg  
ident || | | | | | | | | | | | | | | | | | | | |  
Sbjct GGWVRDRILGEP-vgynIDVDFLTADPVELAKNFAKRIG-----GHFFVFE----- 73  
DSSP LHHHHHHHLLL-111eEEEEELLLLHHHHHHHHHHHLL-----LEEEEL-----

DSSP 11LLEeEEEEEEel1eEEEEEEEEEL-----LLL-----111eEEE 161  
Query xpVKPRrFTAklSyrgrAFATVPIEVSSV-----EAGN-----adqfdTLT  
ident | | | | | | | | | | | | | | | | | | | |  
Sbjct --PTIA-SVVLHL---PPYRyRFDfsPLkgdLEKALiedlkerdfTanaiavnldDVL 126  
DSSP --LEE-EEEEEL---LLEEEEEEEEL111hHHHHhhhh1111hh11eeehHHL

DSSP Elhhhh1111111eeeeeLHHH-----hhhhhhHHHL111111111LLHh1hh 210  
Query SdalglvgpaavavpcXTIPW-----qiaqlhAVTAveepkaNDRAHdlvd  
ident | | | | | | | | | | | | | | | | | | | |  
Sbjct S-----tiVYDPtgikdleqgl1rpsieNLKR-----dPVRVL---- 161  
DSSP L-----11EELL1h1hhhh111ee1111hHHHHH-----1LLHHH----

DSSP hhhhhhh1h1hhhhhhhhhhhhhh111111111111h1hhHHHHHLLL1111L 270  
Query lqllegllldadlxptrsaciaifearaqhpwprvatlphwplIYAGALEGLDh1elaR  
ident  
Sbjct -----RGFRIAIEKN----1Q 173  
DSSP -----HHHHHHHHLL-----1E

DSSP LHHHHHHHHHH-----  
Query TVDAAAQAVQR----- 281  
ident |  
Sbjct LTEDFYEFVKEdprivksaverithelfkimkektahkvirelyeygvleaiipeigr1 233  
DSSP ELHHHHHHHHH1h1hhhh11hhhhhhhhhh111hhhhhhhhhh11hhhh1h1hhhh1

```
DSSP -----
Query ----- 281
ident -----
Sbjct revkdpldehtlktleyleqviedrakylsaellenfgkkrvlgfstdvellkwgalfhd 293
DSSP 111111hhhhhhhhhhhhhhhhhhhhhhhhhhhhhhhhhhhhhhhhhhhhhhhhhhhhhhhhhhhh
```

```
DSSP -----
Query ----- 281
ident -----
Sbjct igkpqtfafyehdkvgaqvireigerlrwgdeatefvaklvrrhhlrpfflreafkkgelk 353
DSSP 111111111111hhhhhhhhhhhhhhhhhhhhhhhhhhhhhhhhhhhhhhhhhhhhhhhhhhhhhhhhhhhh
```

```
DSSP -----
Query ----- 281
ident -----
Sbjct rrgmanfwrecgdiaphlflsidadamasgdeeedikalmetiaelesfnrnemkxxxxx 413
DSSP hhhhhhhhhhh11111hhhhhhhhhhhhhhhhhhhhhhhhhhhhhhhhhhhhhhhhhhhhhhhhhhhhhhhhhhhh
```

```
DSSP -----hhhhhhhh1111
Query -----fvaridratkr 292
ident -----
Sbjct xxxxxxxxxxxxxxxxxxxxxxxxxxxxxxxxxxx 439
DSSP hhhhhhhhhhh1111hhhhhhhhhhhhhhhhhhhhhhhhhhhhhhhhhhhhhhhhhhhhhhhhhhhhhhhhhhhh
```

No 561: Query=mol1A Sbjct=1luja Z-score=4.8

[back to top](#)

```
DSSP -----LLLL-----11LLLLHH
Query -----AAPY----ssPPTNLR 12
ident -----
Sbjct traipeltkllndedqvvvnkaavmvhqlskeasrhaimrspqMVSAivrtmqNTNDVE 60
DSSP 1111hhhhhhhh1111hhhhhhhhhhhhhhhhhhhhhhhhhhhhhhhhhhhhhhhhhhhhhhhhhhhhhhhhhhhh
```

```
DSSP HHHHHHHHHHHHLL-----11HHHHHHHHHHHH-----hhh
Query SLRDRLTQVAERQG-----vvfGRLQRHVAXIV-----vaq 43
ident | |
Sbjct TARCTAGTLHNLShhregllaifksgGIPALVKMLGSpvdsvlfyaittlnhhllhqega 120
DSSP HHHHHHHHHHHHLL11hhhhhhhhhh11HHHHHHHHHLLL1111hhhhhhhhhhhhhhhhhhhh111h
```

```
DSSP hhh1111111111eEEH-----HHHHHHHHLL1111111111eeeee111hhhhhhhh
Query faat1tdtgap11LVKG-----GSSLELRRGipdsrtskdfatvrrdieliehq 95
ident |
Sbjct kmavrlagglqkmvALLNktnvkflaITTDCLQIL----- 155
DSSP hhhhhhh11hhhhhhHHHH111hhhhhHHHHHHHHH-----
```

```
DSSP hhhhhhh1111eeeee1111eell1111111111eeeeeeeelleeeeeeeeeell11111
Query adagetgwegftaiftapeeiaapgxpvkprfrftaklsyrgafatvpievssveagnad 155
ident -----
Sbjct ----- 155
DSSP -----
```

```
DSSP 1leeeee1hhhh1111111111eLLHHHHHHHHHHHH1111111111LLHHHHHHHHHH
Query qfdt1tsdalglvpaavavpcXTIPWQIAQKLHAVtavlepkandRAHDLVDLQLE 215
ident | |
Sbjct -----aynqeskliilaSGGPQALVNIMRTY-----tYEKLLWTTSRVL 195
DSSP -----h111hhhhhhhhhhLHHHHHHHHHHH-----1LHHHHHHHHHHH
```

```
DSSP HHL--LHHHHHHHHHHHHhhhhhh111111L111111111111hhhhhhhhhh1111111111LHH
Query GLL--LDADLXPTRSACIAifearaqhwpPRVATlphwpliayagalegldhlelarTVD 273
ident | | |
Sbjct KVLsvCSSNKPAIVEAG-----gmqa1GLHLT-----dPSQ 226
DSSP HHHh1LL11HHHHHHHLL-----hhhhHLL11-----1LLH
```

```
DSSP HHHHHHHHHHHHHHHHLL-----
Query AAAQAVQRFVARIDRATKR----- 292
```

```

DSSP  HHHHHHHHHHHHHLLLLLLL1111hhhhhhhhhh1111hhhhhhhhhhhh1111hhhh
DSSP  -----
Query  ----- 292
ident
Sbjct  mmvcqvggiealvrtvrlragdreditepaicalrhltsrhqeamaqnavrlhyglpvvv 346
DSSP  hhhhh11hhhhhhhhhhhh111hhhhhhhhhhhh11111hhhhhhhhhh111hhhh

DSSP  -----
Query  ----- 292
ident
Sbjct  kllhppshwplikatvglirnalcpanhaplreqgaiprlvqllvrahqdtqrgvrme 406
DSSP  h111111hhhhhhhhhhhh111hhhhhhhhhh11hhhhhhhhhhhhhhhh11111hh

DSSP  -----
Query  ----- 292
ident
Sbjct  ivegctgalhilarvdhnrivirgltntiplfvqllyspieniqrvaagvlcelaqdkea 466
DSSP  hhhhhhhhhhh111hhhhhhhh11hhhhhhhh11hhhhhhhhhhhhhh111hhhh

DSSP  -----
Query  ----- 292
ident
Sbjct  eaieaegatapl tellhsrnegvatyaaavlfrms 501
DSSP  hhhhh111hhhh111111hhhhhhhhhhhh11

```

No 562: Query=mol1A Sbjct=3wfrH Z-score=4.7

[back to top](#)

```

DSSP  111111111hhhhhhhhhhhh1111hhhhhhhhhhHHHHHHHHLLLL1LLLLIEEEE
Query  aapyspptnlrslrdrltqvaerqgvfgrlqrhvaxIVVAQFAATLTDdTGAPILLVK 60
ident  |
Sbjct  -----xxxlnfyLSYFDDVAKVLP-REHY-CFIV 27
DSSP  -----111111LLHHHHHHHHLL-LLLL-EEEE

```

```

DSSP  HHHHHHHHHLL11111LEEEEEELLLHHHHHHHHHHHH1111eeEELLEELLLL
Query  GGSLELRRGIPdsrtsKDFATVARRDIELIHEQLADAGEtgewgftaIFTAPEEIAAPG 120
ident  || | | | |
Sbjct  GGWVRDRILGEP-vgynIDVDFLTADPVELAKNFAKRIG-----GHFFVFEKRGFL 78
DSSP  LHHHHHHHHLL-111eEEEEEEELLLHHHHHHHHHHHLL-----LEELLEELLLL

```

```

DSSP  LLLLEeEEEEEEe11eEEEEEEEEEL----LLL-----1111EEE
Query  XPVKPRrFTAKLSyrgrAFATVPIEVSSV----EAGN-----adqfDTL 160
ident  |
Sbjct  IKRPTIaSVVLHL---PPYRYRFDfSPLkgkd1EKALiedlkerdf tanaiavnldDVL 134
DSSP  LLLLEeEEEEEL----LLEEEEEEEEL1111hHHHHhhhh1111hhhl1eeehHHL

```

```

DSSP  EE1hhhh11111eEEEEELHHH-----hhhhhhHHHL111111LLLHhhh
Query  TSdalglvgvpaavavpcxTIPW-----qiaqklhAVTAveepkaNDRAHdlv 209
ident  |
Sbjct  ST-----iVYDPtggikdleqgllrpvsieNLKR-----dPVRVL--- 169
DSSP  LL-----1LLL11hhhhhh11e1111hhHHHH-----1LHHH---

```

```

DSSP  hhhhhhh11hhhhhhhhhhhhhhhh11111111111hhhhHHHHLL11111
Query  dlqllegllldadlxptrsaciaifearaqhpwprvatlphwpliYAGALEGLdhlela 269
ident
Sbjct  -----rGFRIAIEK-----n 179
DSSP  -----hHHHHHHHL-----1

```

```

DSSP  11HHHHHHHH-----
Query  rtVDAAAQAV----- 279
ident
Sbjct  lqLTEDFYEFvkedprivlksaverithelfkimkektahkvirelyeygvleaiipeig 239
DSSP  1eELHHHHHHhhhhhhhh11hhhhhhhhhhhh111hhhhhhhhhh11hhhh11hhhh

```

```

Query ----- 279
ident
Sbjct rlvkdpdldhtlktleyleqviedrakylsaellenfgkkrvlgeftdvellkwgalf 299
DSSP hhh11111hhhhhhhhhhhhhhhhhh11hhhh11hhhh1111111111hhhhhhhhhh1

DSSP -----
Query ----- 279
ident
Sbjct hdigkpqtfafehdkvgaqvireigerlrwgdeatefvaklvrhhrpfflreafkkg 359
DSSP 111111111111hhhhhhhhhhhhhhhh11hhhhhhhhhhhh11hhhhhhhhhh11

DSSP -----
Query ----- 279
ident
Sbjct lkrrgmanfwrecgdiaphlflsiasadamasgdeedikalmetiaefsnrnemkeei 419
DSSP 11hhhhhhhhhh1111hhhhhhhhhhhhhh1111hhhhhhhhhhhhhhhhhh1111hhhh

DSSP -----hhhhhhhh1111
Query -----qrfvaridratkr 292
ident
Sbjct qkxxxxxxxxxxxxxxxxxxxxxxxxxxxxxxxxxxxxxxxxxxxx 463
DSSP h11hhhhhh11111hhhhhhhhhhhh1111hhhhhhhhhhhh1

```

No 563: Query=mol1A Sbjct=1jaja Z-score=4.7

[back to top](#)

```

DSSP 1111111111hhhhhhhhhhhh11LHHHHHHHHHHHHHHHHHHLLL LLLLLL---1E
Query aapyspntlrslrdlqtvaerqgvVFGRLQRHVAXIVVAQFAaTLTDDTGAP---1L 57
ident
Sbjct -----MLTLIQGKKIVNHLRSRL-AFEYNGQLkilsK 32
DSSP -----LEEHHHHHHHHHHHHLE-EEEELEEEe11L

```

```

DSSP EEEhhHHHHHHHLLL11111LEEEEEELL--LHHHHHHHHHHHHHLLLIEEEEELLLEE
Query LVKggSSLELRGIPdsrtsKDFATVARR--DIELIHEQLadageTGWEgFTAIFTAPEE 115
ident
Sbjct NIV--AVGSLRREEK-m1ndVDLLIIVPEkkLLKHVLPNI-----RIKG-LSFSVKVCGE 83
DSSP LEE--EEEEHHHLLL-ee11EEEEEEELLhhHHHLLLLEE-----EELL-LEEEEEEEELL

```

```

DSSP 1111111111EEEEEEEEEL1EEEEEEEEEEELL1111111111eeee1hhhh11111lee
Query iaapgxpvkpRRFTAKLSYRgRAFATVPIEVSSVEagnadqfdt1tsdalglvgvpaava 175
ident
Sbjct -----RKCVLFIWEW-KKTYQLDLFTALAE----- 107
DSSP -----LEEEEEEEELL-LLEEEEEEEELL-----

```

```

DSSP ee11hhhhhhhhhhhh11111111LLLhHHHHHHHHHHhh11hhhhhhhhhhHHHH-
Query vpcxtipqiaqlhvtavleepkaNDRAhd1vd1q1leg11ldad1xp1rsacIAIF- 234
ident
Sbjct -----ekpyaifhftgpySYLI-riraalkknyklnqyglfknqtlVPLKi 153
DSSP -----1hhhhhhhh11hHHHH-hhhhhhh11eeee11eeee1leeELLL1

```

```

DSSP -hhh1111LLLL11111hhhhhhhh1111111111hhhhhhhhhhhhhh1111
Query -earaqhpWPPRVatlphwpliyagalegl dhlelartvdaaaqavqrfvaridratkr 292
ident
Sbjct ttekelikELGFT-----yripkkr1 174
DSSP 11hhhhhhHLLL-----11hhhh11

```

No 564: Query=mol1A Sbjct=2z6gA Z-score=4.7

[back to top](#)

```

DSSP -----
Query ----- 0
ident
Sbjct epsqmlkhavnlninyqdaelatrapeltkl1ndedqvvnkaavmvhqlskeasrh 60

```

DSSP -----LLLL----11LLLHHHHHHHHHHHHHLL-----1hhHHHHHHHHH  
Query -----AAPY----ssPPTNLRSLRDLTQVAERQG-----vvfgrLQRHVAXIV 40  
ident |  
Sbjct aimrspqMVAivrtmqNTNDVETARCTSGTLHNLShhregllaifksggIPALVNMLGS 120  
DSSP hh111hhHHHHhhhhhhHLLHHHHHHHHHHHHHLLhhhhhhhhhh1hHHHHHHHLL

DSSP H-----hHHHH1111111111eEEEH-----HHHHhHHHL111  
Query V-----aqfaatltddtgap11LVKG-----GSSLeLRRGipd 73  
ident |  
Sbjct Pvdsvlfhaitt1hnl1llhqegakmavr1agglqkmvALLNktnvkfIAITTDCLQI--- 177  
DSSP Llhhhhhhhhhhhhhhhh111hhhhhh11hhhhhhHHHH111hhhhHHHHHHHHH---

DSSP 11111leeeee11hhhhhhhhhhhh111leeeee11lee11111111leeeeeee  
Query srtskdfatvarrdieliheqladagetgwegftaiftapeeiaapgxpvkprftakls 133  
ident |  
Sbjct ----- 177  
DSSP -----

DSSP elleeeeeeeeeee11111111leeeelhhhh111111leeeeeLLHHHHHHHHHHHh  
Query yrgrafatvpievssveagnadqfdt1tsdalglvgvpaavavpcXTIPWQIAQKLHAVt 193  
ident |  
Sbjct -----laygnqeskliilaSGGPQALVNIMRTY- 205  
DSSP -----hh111hhhhhhhh1LLHHHHHHHHHLL-

DSSP 111111111LLHHHHHHHHHHHLL--LHHHHHHHHHHhhhhhh111111LLLLL11  
Query avleepkandRAHDLVDLQLEGLL--LDADLXPTRSACiaifearaqhpwPRVATLph 251  
ident | | | | |  
Sbjct -----tYEKLLWTTSRVLKVLsvCSSNKPAIVEAG-----gmqalGLHLTD-- 246  
DSSP -----1LHHHHHHHHHHHHHLLLHHHHHHHLL-----hhhhHHHLL--

DSSP hhhhhhhhh111111111LHHHHHHHHHHHHHHHLLLL-----  
Query wpliyagaleglhdhlarTVDAQAQAVQRFVARIDRATKR----- 292  
ident | | | | |  
Sbjct -----PSQRLVQNCLWTLRNLSDAATKqegmegllgtlvqllgsdd 287  
DSSP -----LLHHHHHHHHHHHHHLLLL1111hhhhhhhhhh11111

DSSP -----  
Query ----- 292  
ident |  
Sbjct invvtcaagilsnltcnyknkmmvcqvggiealvrtv1ragdreditapaicalrh1ts 347  
DSSP hhhhhhhhhhhhh1111hhhhhhhh111hhhhhhhhhhhh111hhhhhhhhhhhh111

DSSP -----  
Query ----- 292  
ident |  
Sbjct rhqdaemaqnavrlhyglpvvkl1hppswhplikatvg1irnlalcpanhap1reqgai 407  
DSSP 1111hhhhhhhhhh111hhhhhh111111hhhhhhhhhhhhhh11hhhhhhhhhh11hh

DSSP -----  
Query ----- 292  
ident |  
Sbjct prlvqllvrahqdtqrtsqfvegvrmeeeiveactgalhilardihnrivirglntiplf 467  
DSSP hhhhhhhhhhhhhhh1111111111hhhhhhhhhhhhhh111hhhhhhhhhh111hhh

DSSP -----  
Query ----- 292  
ident |  
Sbjct vqllyspieniqrvaagv1celaqdkaeaaeiaegatapl1ellhsrnegvatyaaav1 527  
DSSP hhhhh111hhhhhhhhhhhhhh111hhhhhhhh111hhhhhhhhhh111hhhhhhhhhh

DSSP -----  
Query ----- 292  
ident |  
Sbjct frmsedkpqdykkr1sveltss1 550  
DSSP hhhh111111hhhhhhhhhhhh1



```

ident | |
Sbjct kktftevqterleqadrsvlikcpsklnKLLQylsshgkidnyffFENRGIH--ALIE 58
DSSP 111hhhhhhhhhhhhhhleeeeee11111hHHHHhhhh1111eEEEEELLEE--EEEE

DSSP -----
Query ----- 20
ident
Sbjct fsekssvaslqavtgiipkaeahhvpyksrlftftlknpgsqaaerpvkispqshipvn 118
DSSP e111hhhhhhhh11111hhhh1111111111eEEEEe1111111111111111111111hh

DSSP -----hhhh11LLHHHHHHHHHHHHHHHHHHLL111111LLEEEEH
Query -----vaerqgVVFGRQLQRHVAXIVVAQFAATLTddtgaPLLLVKG 61
ident
Sbjct elipklchadsissqmyillneyqlTEENIKLRYLACSLVRDFARAYF-----PDSTVKP 173
DSSP hhhhhhh1111hhhhhhhhhh11LHHHHHHHHHHHHHHHHHHLL-----LLEEEEE

DSSP Hhhhhhh11111111LLEEEEL-----1LHHHHHHHHHHHHHHLL
Query GsslelrrgipdsrtsKDFATVAR-----rDIELIHEQLADAGETGW 103
ident
Sbjct F--gssvntfkglgcdVDMFLDFHdkgpfemeyqmkr1pser1ATQKILSIIGDCLDNFG 231
DSSP E--hhh1111111111ELEEEL1111eEEEE111111hhHHHHHHHHHHHHHHLL

DSSP 11EEEE-ELLLEEL111111LLEEEEEEEEEE1leeEEEEEEEEEe11111111eEEEE
Query egFTAI-FTAPEE1aapgxpvKPRRFTAKLSYrgraFATVPIEVSsveagnadqfdtlts 162
ident
Sbjct --PGYSsVQKILNA-----RCPLVKFSHQp---tGFQCDSLVS----- 264
DSSP --LLEEeEEEELLL-----LLEEEEEEL---1LLEEEEEEEL-----

DSSP 1hhhh111111eEEEE1hhhhHHHHHHHH11111111LLLLhhhhhhhhhh11hh
Query dalglvgvpaavavpctipqiaQKLHAVTavleepkaNDRAhdldvldlqlllegl1dad 222
ident
Sbjct -----nsIAIRCSEL-----LYIY----- 278
DSSP -----1hHHHHHHHH-----HHHH-----

DSSP hhhhhhhhhhhhh11111111111LHHhhHHHHHL-1LLLL-----
Query lxptrsaciaifearaqhpwpprvatlphWPLiYAGALE-gLDHL----- 266
ident
Sbjct -----gCLDPrVRALVFs1RCWARvhgltntsvpgtwit 311
DSSP -----hHHLHhHHHHHHhhHHHHhh111111111111

DSSP ---1111LHHHHHHH-----
Query ---elarTVDAAAQA----- 278
ident
Sbjct nfs1tmmIMFFLQKRspipi1tdqlkeladekdkhviggydcsfvsdlskikptkntet 371
DSSP hhhhhhhHHHHHHLL111111hhhhhhhh11hh11ee1lee111111hh1111111111

DSSP -----hhhhhhhhHLLL-----
Query -----vqrfvaridRATKR----- 292
ident
Sbjct ldellcdfqyfgnfdfrknslnlrkgkevNKPEssplyiwnpfeqdlniskvnpqple 431
DSSP hhhhhhhhhhh111111ee1111eeL111111ee111111111111hhhh

DSSP -----
Query ----- 292
ident
Sbjct kfvamaresawilqkedktqminkepwglaavlipf 468
DSSP hhhhhhhhhhhhh1111hhhhhh11111hhhh1111

```

No 567: Query=mol1A Sbjct=5a2xB Z-score=4.7

[back to top](#)

```

DSSP -----L111LHHHHhhHHHH
Query -----AAPYS-----sptNLS1rDRLT 19
ident
Sbjct rkkftevqterleqadrsvlikcpsklnKLLQylsshgkidnyfffeNRGI--HALI 58

```





Sbjct AF--gslesglalknsdMDLCVLM---DTIALQFYEEELIAE---GFEGKFLQR----- 92  
DSSP EE--lhhhh11111111EEEEEEEL---LLHHHHHHHHHHHH---LLEEEEE-----

DSSP 11LLEEEEEEEeelleeEEEEEEe11111111eelleh11111111eellee 180  
Query xpvKPRRFTAKLsyrgraFATVPIEVsveagnadqfdtlttsdalglvgvpaavavpcxt  
ident |  
Sbjct --aRIPIIKLTS-----SFQCDIGFN----- 111  
DSSP --LLEEEEEEL-----LLEEEEE-----

DSSP hhhhhhHHHHHH11111111LLLhHHHHHHHHHH11hHHHHHHHHHHHHHH111 240  
Query ipwqiaQKLHAVtavleepkaNDRAhdldlqllegllldadlxptrsaciaifearaqh  
ident |  
Sbjct --nrIaIHNTLL-----LSSY----- 125  
DSSP --lhhhHHHHHH-----HHHH-----

DSSP 1111111111LHHhHHHHHL-1LLL-----1111LHHHHHH----- 277  
Query pwpprvatlpHWPLiYAGALE-gLDHL-----elarTVDAAAQ-----  
ident |  
Sbjct -----tkLDAR-LKPMVllvKHWAkrkqinspyfgtllssygvlmVLYYLIHvikpp 176  
DSSP -----hhHLLL-HHHHHHhhHHHHhh1111h1111hHHHHHHHHHHHH1111

DSSP ----- 277  
Query -----  
ident |  
Sbjct vfpnllsplskekivdgdvfdkledippsqnysslgsllhgffrfyaykfepekv 236  
DSSP 111111111111eeleee111111h11111111hHHHHHHHHHHHH111111e

DSSP hhHHHH-----hhhHLLL----- 292  
Query avQRFV-----aridRATKR-----  
ident |  
Sbjct vtFRRPdgyltkqekGWTSatehtgsadkdryilaiedpfeishnvgtrtvssglyriring 296  
DSSP e1LLL11111hHHHLLL11111111111111e11111111111111hHHHHHHHH

DSSP -----  
Query ----- 292  
ident |  
Sbjct efmaasrllnsrasyppidydlfeeapip 324  
DSSP hhhhhhh11111111hHHHH111111

No 569: Query=mol1A Sbjct=4nkuB Z-score=4.7

[back to top](#)

DSSP 111111111hHHHHHHHHHHHH11LHHHHHHHHHHHHHHHHHLLL111111LLEEEE 60  
Query aapyspntnlrslrdrltqvaerqVVFGRlQRHVAXIVVAQFAATLTddtgaPLLLVK  
ident | |  
Sbjct -----mshkeftkfcyevyeikiSDKEFKKRAALDTLRLCLKRIS-----PDAELV 48  
DSSP -----111hHHHHHHHHHHHH11LHHHHHHHHHHHHHHHHHLLL-----LLEEEE

DSSP HHHhhhhhh11111111LLEEEEL1hhHHHHHHHHHHH111eEEELLEE1111 120  
Query GGsslelrrgipdsrtsKDFATVARrdieLIHEQLADAGETGwegfTAIFTAPEEiaapg  
ident | | |  
Sbjct AF--gslesglalknsdMDLCVLM---TIALQFYEEELIAE---GFEGKFLQI----- 93  
DSSP EE--hhhh11111111EEEEEEEL---LHHHHHHHHHHHL---LLEEEEL-----

DSSP 1111111111eelleeEEEEEEe11111111eelleh11111111eellee 180  
Query xpvkPRRFTAKLsyrgraFATVPIEVsveagnadqfdtlttsdalglvgvpaavavpcxt  
ident |  
Sbjct -----PIIKLTS-----FQCAIGFN----- 108  
DSSP -----LEEEEL-----LLEEEEL-----

DSSP hhhhhhHHHHHH11111111LLLhHHHHHHHHHH11hHHHHHHHHHHHHHH111 240  
Query ipwqiaQKLHAVtavleepkaNDRAhdldlqllegllldadlxptrsaciaifearaqh  
ident |  
Sbjct --nrIaIHNTLL-----LSSY----- 122  
DSSP --lhhhHHHHHH-----HHHH-----





```

Query h1elartvdaaaqavqrfvaridratkr 292
ident
Sbjct -----iepwerna 338
DSSP -----11hhhh111

```

No 572: Query=mol1A Sbjct=2m2vA Z-score=4.7

[back to top](#)

```

DSSP 111111111hhhhhhhhhhhhhhhh1111hhhhhHHHHHHHHHHHHHLL-----1LLLL
Query aapyssptnlrslrdrltqvaerqgvfgrlqrhVAXIVVAQFAATL-----tdDTGA 54
ident
Sbjct -----m1TLIQGKKIVNHLRSRlafeyngQLIKI 29
DSSP -----1eHHHHHHHHHHHHHHHleeeelleEDEL

```

```

DSSP L--LEEEHHHHHHHHhh111111LLEEEEL-----1LHHHHHHhhHHHHhh111
Query P--LLLVKGGSSLELrrgipdsrTSKDFATVAR-----rDIELIHeqlADAGetgwe 104
ident
Sbjct LskNIVAVGSLRREE-----kMLNDVDLLIIvpekkl1khVLPNIR---IKGL----- 74
DSSP LhhEEEEELHHHLL-----1EELLEEEEEEe1111hhhhLLEEL---LLL-----

```

```

DSSP leeeEELL1EELL11111LEEEEEEEe1leeEEEEEEEEELLLL111leeeelh
Query gftaIFTApEEIAPgpvxKPRRFTAKLSyrgrAFATVPIEVSSVEAGNadqfdtltsda 164
ident
Sbjct ---SFSV-KVCGE---RKCFLFEWE---KPTYQLDLFTALAE-----108
DSSP ---LLE-EEEL---LEEEEEEEL---LEEEEEEEEEHHH-----

```

```

DSSP hhh11111leeeellhHHHHHHHHhhhh1111111111hHHHHH-----
Query lglvgvpaavavpcxtiPWQIAQKLhavlaveepkandrahDLVDLQ-----212
ident
Sbjct -----kpYAlFHFTG-----PVSYLlIraalkknyk 136
DSSP -----hHHHHHHHL-----LHHHHHHhhhhhh111le

```

```

DSSP ---hhhh11hHHHHHHhhHHHHhhhh1111L11111hhhhhhhh1111111
Query ----1leg11dADLXPtrSACIaifearaqhpWPPRVatlphwplyagalegldhlel 268
ident
Sbjct lnqyglfknqt1VPLKI--TTEK----elikeLGFTY-----167
DSSP ee1leeeelleEELL--LLH-----hhhhHLL-----

```

```

DSSP 111hhhhhhhhhhhhhhhh1111
Query artvdaaaqavqrfvaridratkr 292
ident
Sbjct -----ripkkr1 174
DSSP -----1111111

```

No 573: Query=mol1A Sbjct=3w fqE Z-score=4.7

[back to top](#)

```

DSSP 111111111hhhhhhhhhhhhhh1111hhhhhhhhHHHHHHHLLL11LLEEEEE
Query aapyssptnlrslrdrltqvaerqgvfgrlqrhVAXIVVAQFAATLTDdtGAPLLLVK 60
ident
Sbjct -----xxxglInfyLSYFDDVAKVLP--REHYCFIV 28
DSSP -----11111111LHHHHHHHLL--LLEEEEE

```

```

DSSP HHHHHHHHHLLL1111LLEEEELLLHHHHHHHHHHhh111leeeELLEEL1111
Query GGSSLELRRGIPdsrTSKDFATVARRDIELIHEQLADAGetgwegftaIFTAPEEaapg 120
ident
Sbjct GGWVRDRILGEP~vgynIDVDFLTADPVELAKNFAKRI-----GGHFFVFE---- 74
DSSP LHHHHHHHHLLL-111eEEEEELLLHHHHHHHHHH-----LLEEEEL----

```

```

DSSP 11LLEEEEEEEeelleEEEEEEEEEEL-----LLL-----11LLEE
Query xpVKPRRFTAKLSyrgrAFATVPIEVSSV----EAGN-----adqFDTL 160
ident
Sbjct --PTIASVVLHL-----PPYRFRDFSPKgd1EKALiedlkerdftana1avnlDDVL 127

```

```

DSSP eelhhhhllllllleeeellHHH-----hHHHHHHHHLLllllllLLLhHHh
Query tsdalglvgvpaavavpcxTIPW-----qiaqklhAVTAveepkaNDRAhdlv 209
ident |
Sbjct -----tiVYDPtggikdleqgllrpvsieNLKR-----dPVRV---- 160
DSSP -----lIEELLlhhhhhhhlleellllhhHHHH-----lLLHH----

DSSP hhhhhhhllhhhhhhhhhhhhhhhhllllllllllllllhhHHHHHHLLLLlllll
Query dlqllegllldadlxptrsaciaifearaqhpwpprvatlphwplIYAGALEGLDhlela 269
ident |
Sbjct -----IRGFRIAIEKN----l 172
DSSP -----hHHHHHHHHLL----l

DSSP LLHHHHHHHHHH-----
Query RTVDAAAQAVQR----- 281
ident |
Sbjct QLTEDFYEFVKEdprivlksaverithelfkimkektahkvirelyeygveaiipeigr 232
DSSP EELHHHHHHHHHHlhhhhhhllhhhhhhhhhhllllllhhhhhhhhhhllhhhhhhllhhhh

DSSP -----
Query ----- 281
ident |
Sbjct lrevkdpldehtlktleyleqviedrakylsaellenfgkkrvlgeftdvellkwalgh 292
DSSP hhhllllhhhhhhhhhhhhhhhhllllllllllllleellleehhhhhhhhhll

DSSP -----
Query ----- 281
ident |
Sbjct digkqptfafyehdkvgaqivreigerlrwgdeatefvaklvrrhlrpfllreafkkgel 352
DSSP lllllllllllllhhhhhhhhhhhhhhllllllhhhhhhhhhhhhllllhhhhhhhhhhllll

DSSP -----
Query ----- 281
ident |
Sbjct krrgmanfwrecgdiaphlflsiadamasgdeeedikalmetiaelesfnrnemkxxxx 412
DSSP lhhhhhhhhhhllllhhhhhhhhhhhhhhllllllhhhhhhhhhhhhhhhhhhllllllhh

DSSP -----hHHHHhhllll
Query -----fvaridratkr 292
ident |
Sbjct xxxxxxxxxxxxxxxxxxxxxxxxxxxxxxxx 439
DSSP hhhhhhhhhhhllhhhhhhhhhhhhll

```

No 574: Query=mol1A Sbjct=lq78A Z-score=4.6

[back to top](#)

```

DSSP -----llllllllllhhhhhhhhhhhhllllHHHHHHHHHHHHHHHHHHLLL-
Query -----aapyspptnlrslrdrltqvaerqGVVFGRLQRHVAXIVVaQFAATLTD- 50
ident |
Sbjct hgi t sp is la ap ket dx ll t q kl v et l k p f g v f E E E E L Q R R I L I L G K L n N L V K E W I R e 60
DSSP lllllllllllllhhhhhhhhhhhhhhhhllllllHHHHHHHHHHHHHHHHHHHHHH

DSSP -----lLLLLeEEHHhhhhhhlllllllllLEEEEL--LLHHHHHHHHHH
Query -----dtGAPLlLVKGGsslelrrgipdsrtsKDFATVAR--RDIELIHEQLAD 97
ident | | | | |
Sbjct isesknlpqsvieNVGG-KIFTF--gsyrlgvhtkgadIDALCVAPrhVDRSDFFTSFYD 117
DSSP hhhllllhhhhllLLL-EEEE--hhhhlllllllllEEEEELlLLHHHHLLHHHH

DSSP HHHHLl1LEEEELLEELLlllllllLEEEEEEEellleeEEEEEEEEELLl1LLL
Query AGETGweGFTAIFTAPEEIAapgxpvkPRRFTAkLSygraFATVP1EVSSVEAgnADQF 157
ident | | | | |
Sbjct KLKLQ--EEVKDLRAVEEAF-----VPVIKLCFD----GIEIDILFARLALqtIPED 163
DSSP HHLL--LEEEEEEELL--LLEEEEL--LEEEEEEELLl1LLL

DSSP EeeelhhhhllllleeeellhhHHHHhhhhhhllllllllllllhhhhHHHHHH

```

```

Sbjct L-----DLRD--dsllknldrxrirsingcrvtDEILHL-- 195
DSSP L-----LLLL--hhhhllllhhhhhhhhhhhhHHHLLL--

DSSP 11hhhhhhhhhhhhhhhhllllllllllllhhHHHHHHL-LLLL-----
Query lldadlxptrsaciaifearaqhpwprvatlphwplIYAGALE-gLDHL----- 266
ident |
Sbjct -----vpidNFRLTLRaiKLWkrhniysnil 223
DSSP -----11hhHHHHHHhhHHHHhhllllllll

DSSP -----111LLHHHHHH-----hhhhHHHHhhHLLL---
Query -----elaRTVDAAAQ-----avqrFVARidRATKR--- 292
ident |
Sbjct gflggvswamLVARTCQLypnaiaastlvhkfflvfswewpnpvllKQPE--ECNLNlpv 281
DSSP 1111hhhhhhHHHHHHHLL1111hhhhhhhhhhhhllllllllllllL---LLLLL111

DSSP -----
Query ----- 292
ident |
Sbjct wdprvnpsdryhlmpiiitpaypqqnstynsvstrmvmveefkqglaitdeillskaews 341
DSSP 111111hhhhhhllllllllllllllllllllhhhhhhhhhhhhhhhhhhhhllllllhh

DSSP -----
Query ----- 292
ident |
Sbjct klfeapnffqkykhyivllasaptekrlewgvlveskirilvgsleknefitlahvnpq 401
DSSP hhhllllhhhhllleeeeeeeellhhhhhhhhhhhhhhhhhhhhhhllleeeeeell

DSSP -----
Query ----- 292
ident |
Sbjct sfpapkenpdkeefrtmwvlgvfkdltydiqsftdtvyrqainskmfevdmkiaamhvk 461
DSSP lee11111111leeeeeeeellhhhhhhhhhhhhhhhhhhhhllllllleeeeeee

DSSP -----
Query ----- 292
ident |
Sbjct rkqlhqllp 470
DSSP hhhhlllll

```

No 575: Query=mol1A Sbjct=5a2yA Z-score=4.6

[back to top](#)

```

DSSP -----LLLL-----111LLHHHHhhHHHH-
Query -----AAPY-----sspPTNLRSLrdRLTQ- 20
ident | |
Sbjct ktftvqterleqadrsvlikcpklnKLLqylsshgkidnyfffENRGIH--ALIEf 58
DSSP 11hhhhhhhhhhhhleeeee11111hHHHHhhhhhhllleeeeeEELLLEE--EEEE

DSSP -----
Query ----- 20
ident |
Sbjct sekssvaslqavtgipkaeahhvpyksrlftftlknpgsqaaerpvkispqshipvne 118
DSSP 111hhhhhhhhllllllhhhhllllllllleeeee111111111111111111111111hh

DSSP -----hhhh111LLHHHHHHHHHHHHHHHHHLLL11111LEEEEEEH
Query -----vaerqgVVFGRlQRHVAXIVVAQFAATLTddtgaPLLVKGG 62
ident | | | | | |
Sbjct lipklchadsissqmyillneyqlTEENIKLRYLACSLVRDFARAYF----PDSTVKPF 173
DSSP hhhhhllllhhhhhhhhhhllLHHHHHHHHHHHHHHHHHLLL----LLEEEEEE

DSSP hhhhhhhllllllllLEEEEEE-----1LHHHHHHHHHHH-HHL
Query sslelrrgipdsrtsKDFATVAR-----rDIELIHEQLADAG-ETG 102
ident | | | |
Sbjct --gssvntfgklgcdVDMFLDFHdkkqpfemeyqmkr1pser1ATQKILSIGDCLdNFG 231
DSSP --hhhllllllllLEEEEEE11111leeeee1111111hhhhHHHHHHHHHHHHHHL

```

DSSP LIIEEEEEELLEEELI111111LLEEEEEEEEEEl1eeEEEEEEEEEl11111111leeeee  
Query WegFTAIFTAPEEiaapgxvKPRRF TAKLSYrgraFATVPIEVSsveagnadqfdtlts 162  
ident | |  
Sbjct P--GYSSVQKILNA-----RCPLVKFSHQp---tGFQCDSVS----- 264  
DSSP L--LEEEEEELLL-----LLEEEEEELLL---LLEEEEEEL-----

DSSP lhhhh111111leeeee11hhhhhHHHHHHHHH11111111LLLLhhhhhhhhhhhh11hhh  
Query dalglvgvpaavapcxtipwqiAQKLHAVTavlepkANDRAhdldlqllegl1ldad 222  
ident  
Sbjct -----nsIAIRCSEL-----LYIY----- 278  
DSSP -----lHHHHHHHH-----HHHH-----

DSSP hhhhhhhhhhhhh1111111111111111LHHHhHHHHHL-LLLL-----  
Query lxptrsaciaifearaqhpwprvatlpHWPLiYAGALE-gLDHL----- 266  
ident  
Sbjct -----gCLDPVRALVFs1RCWARvhgltnsvpgtwit 311  
DSSP -----hHHLHhHHHHHHhHHHHhh111111111111

DSSP ---1111LHHHHHH-----  
Query ---elarTVDAAAQA----- 278  
ident  
Sbjct nfs1tmmIMFFLQKRspiiptldqkeladekdkhvggydcsvsdlskikptkntet 371  
DSSP hhhhhhhHHHHHLL111111hhhhhh11111111leel1ee111111hhhh11111111

DSSP -----hhhhhhhhHLLL-----  
Query -----vqrfvaridRATKR----- 292  
ident  
Sbjct ldellcdfqyfgnfdfrknslnlrkgevnKPESsplyiwnpfeqdlnisknvnqpql 431  
DSSP hhhhhhhhhhh111111leee111leeeL111111111111111111111111hhhhh

DSSP -----  
Query ----- 292  
ident  
Sbjct kfvamaresawilqkedktqminkepwglaavlipf 468  
DSSP hhhhhhhhhhh111111hhhh111111hhhh1111

No 576: Query=mol1A Sbjct=3hj4A Z-score=4.6

[back to top](#)

DSSP 1111111111hhhhhhhhhhhh11LLHHHHHHHHHHHHHHHHHHLL111111LLEEEE  
Query aapyspntnlrslrdrltqvaerqVVFGRQRHVAXIVVAQFAATLtdtgaPLLLVK 60  
ident | | |  
Sbjct -----vakrefirgxxahyraslpPPEHSVVIHELQKRVLDTIGXLA----vNKAHVE 48  
DSSP -----1hhhhhhhhhhhh11LLHHHHHHHHHHHHHHHHHH-----LLEEEE

DSSP HHhhhhhh1111111LLEEEEL-----LHHHHHHHHHHHHHLL111EE  
Query GGsslerrgipdsrtsKDFATVAR-----rDIELIHEQLADAGETGwegFT 107  
ident | |  
Sbjct LF--gshvsgfctphsdADISLTYRnfsplwqgxervdeQNNKRXTRFGKEASAX---GX 103  
DSSP EE--1hhhh11111111EEEEEL111hh111hhhhHHHHHHHHHHHHHHHHHH---LL

DSSP EEELLLEE1111111LLEEEEEEEEl1eEEEEEEEEEl11111111leeeee1hhhh  
Query AIFTAPEEiaapgxvKPRRF TAKLSYrgraFATVPIEVSsveagnadqfdtltsdalgl 167  
ident  
Sbjct EDVRYIRA-----RIPVVQFTDGV---TGIHCDVSIG----- 132  
DSSP EEEEEEL-----LLEEEEEELLL---LLEEEEEEL-----

DSSP 111111leeeee11hhhhhHHHHHHH11111111LLLLhhhhhhhhhhhh11hhhhhhhh  
Query vgvpavavapcxtipwqiaQKLHAVTavlepkANDRAhdldlqllegl1ldadlxptr 227  
ident  
Sbjct -----niggvENSKIL-----CAIR----- 147  
DSSP -----1hhhhHHHHHH-----HHHH-----

DSSP hhhhhhhhh1111111111111111LHHHHHHHHHL-LLLL-----1111hH  
Query saciaifearaqhpwprvatlpHWPLiYAGALE-gLDHL-----elartvd 273

```
DSSP -----hLHHHHHHHHHHHHHHHHHHhLlLlLhHHllLlLhHHHHHH
DSSP HHHH-----
Query AAAQ----- 277
ident |
Sbjct ALXVlqelgllpvfskptgef geltvadaexllqefklppiyslhdddeklgeavffcL 246
DSSP HHHHHhhhhllllllllllllllllllllllhhhhhhhhllllllllhhhhhhllllllhhhhhhhhhhhh

DSSP -----hHHHHHHHHhhHLLL-----
Query -----aVQRFVARidRATK----- 291
ident |
Sbjct qrfaeyyakydfsagtvsLIHPRRHrtVYERvvrhlellgsrkrlewekhiaehkedgp 306
DSSP hhhhhhhhhllllllllllllllllllllllhHHHHhhhhhhhhhhhhhhhhhhhhhhhhhhhhhhhhhhll

DSSP -----
Query ----- 291
ident |
Sbjct ldendfsasxqnettqrpsnspyvvedfvnyvncgrrvqasvrhriqqefnrlrexliDK 366
DSSP llhhhhhhhhhhhhhhllllllllllllllllllllllllllllhhhhhhhhhhhhhhhhhhhhhhll

DSSP -----l
Query -----r 292
ident |
Sbjct eselkfdvresdt 381
DSSP hhhllhhhhlllllll
```

No 577: Query=mol1A Sbjct=3hj4B Z-score=4.6

[back to top](#)

```
DSSP lllllllllllhhhhhhhhhhhhhhllLLHHHHHHHHHHHHHHHHHHLLllllllllLEEEE
Query aapyspntnlrslrdrltqvaerqGVVFGRLQRHVAXIVVAQFAATLlddtgaPLLVK 60
ident |
Sbjct -----vakrefirgxxahyraslPPPEHSVVIHELQKRVLDIGXLA-----vNKAHVE 48
DSSP -----lhhhhhhhhhhhhhhhhllLLLHHHHHHHHHHHHHHHHHHHH-----llLEEE

DSSP HHHhhhhhhllllllllllLEEEEEEL-----LHHHHHHHHHHHHHHHLLl11EE
Query GGsslelrrgipdsrtsKDFATVAR-----rDIELIHEQLADAGETGwegFT 107
ident |
Sbjct LF--gshvsgfc tphsdADISLTYRnfspwlqgxervdeQNNKRXTRFGKEASAX---GX 103
DSSP EE--lhhhhllllllllLEEEEEELlllllllllhhhhhhHHHHHHHHHHHHHHHH---LL

DSSP EEELLLEEl1llllllLEEEEEEEElleEEEEEEEEEl1llllllleeeellhhhh
Query AIFTAPEIaapgxpkPRRFTAKLSYrgrAFATVPIEVSSveagnadqfdtltsdalgl 167
ident |
Sbjct EDVRYIRA-----RIPVVQFTDGV---TGIHCDVSIg----- 132
DSSP EEEEEELL-----LLEEEEEELL-----LLEEEEEEL-----

DSSP lllllleeeellhhhhhhhhhhhhllllllllLLLhhhhhhhhhhllhhhhhhhh
Query vgvpaavavpctipwqiaqklhavlavleepkaNDRAhd1vdqllegl1ldadlxptr 227
ident |
Sbjct -----niggvenskILCA----- 145
DSSP -----lhhhhhhhhHHHH-----

DSSP hhhhhhhhhllllllllllllllllllHHHH-hHHHHLLL-LLLL-----
Query saciaifearaqhpwrpratlphWPLI-yAGALEGL-DHLE----- 267
ident |
Sbjct -----irQVFPdfYGAYIHLvKAWGkareviaperstfnsftv 183
DSSP -----hhLLHhhHHHHHHHHHHHHhhllllllhhllllllhhhh

DSSP lllLHHHHHH
Query larTVDAAAQ----- 277
ident |
Sbjct ttxALXLQEElgllpvfskptgef geltvadaexllqefklppiyslhdddeklgeavf 243
DSSP hhhHHHHHHHHllllllllllllllllllllllhhhhhhhhhhllllllhhhhllllhhhhhhhh
```







Sbjct dklnhhqr1g1kyfedteKKIP-KEEMLQMWD1VLNeVKKLDPEY1A1VC---GSPKKG 176  
DSSP 111111111111111111LLLEE-HHHHHHHHHHHHHHHHHLLLLEEEEL---HHHHHLL

DSSP L1111111111111111111LHHHHHHHHHHHHhh1111eeEEELLLEEL11  
Query IpdsrTSKDFATVAR-----rDIELIHEQLADAGetgwegftAIFTAPEEIaa 118  
ident | | | | | |  
Sbjct E---SSGDMDVLLThpnftsesskqpkLLHRVVEQLQKVR-----FIDTTLKSG-- 222  
DSSP L---EELLEEEEEEL111111111111hHHHHHHHHHHHLL-----LEEEEEELL--

DSSP 1111111111111111111eEEEEEEEEEL-LLL1111eeeee1hhh11111lee  
Query pgxpVKPRRFATAKLSYRG--rAFATVPIEVSSV-EAGNadqfdt1tsdalglvgpaava 175  
ident | | | | | |  
Sbjct ---ETKFMGVCQLPSEndenEYPHRRIDIRLIpKDQY----- 256  
DSSP ---LLEEEL111111111111LLLEEEEEEL1HHHL-----

DSSP eeellhHHHHHHHHhhhh111111111111hHHHHHHHH-----  
Query vpcxtiPWQIAQKlhavtavlepkandrahdlvDLQLL----- 214  
ident  
Sbjct ----yCGVLYFT-----gSDIFNknmrahalekgftineytirp 291  
DSSP ----hHHHHHLL-----1LHHHHhhhhhhhhhhleeell11lee

DSSP -hhh11hhhhhhhhHHHHhhhhhh111111111111hhhhhhhh1111111111hh  
Query -egllldadlxptrSACIaifearaqhPWPPrvatlphwplyagaleglhdhleartvd 273  
ident |  
Sbjct lgvtagageplpvdSEQD-----ifDYIQRW----- 317  
DSSP 111111111111111111LHHH-----hhHLLLL-----

DSSP hhhhhhhhhhhhhhh1111  
Query aaaqavqrfvaridratkr 292  
ident  
Sbjct -----yrepkdrs 325  
DSSP -----111hh1

No 581: Query=mol1A Sbjct=3auoA Z-score=4.6

[back to top](#)

DSSP -----  
Query ----- 0  
ident  
Sbjct mrnqelarifeeiglmseflgdnprfrvrayqaartlyldtpieeiaekgkealmelpg 60  
DSSP 11hhhhhhhhhhhhhh1111hhhhhhhhhhhhhhhh1111hhhh111hh11111

DSSP -----  
Query ----- 0  
ident  
Sbjct vgpdaekileflrtgkvrkeelsrkvprgvlevmevpgvgpkarlllyeglgidslek 120  
DSSP 111hhhhhhhhhhhh111hhhhhhhhhh11hhhhhh111111hhhhhhhhhh1111hh

DSSP ----111111111111hhhhhhhhhhhh1111hhhhHHHHHHHHHHHH-HLLLL1111  
Query ----aapyspntnlrslrdrltqvaerqgvfgrlQRHVAXIVVAQFA-ATLTDdtga 54  
ident | |  
Sbjct lkaaldrgdltr1kgfpgkraerireglalaqaagkrRPLGAVLSLARSLIEAIRAlpgv 180  
DSSP hhhhhhh1111111111hhhhhhhhhhhhhh1111EEHHHHHHHHHHHHHHHLL1111

DSSP 1LEEEHHHHHHHHhh111111111111LLEEEEL-----1LHHHHHHHHhhhhhh1111eeeE  
Query pLLLVKGSSLELrrgipdsrTSKDFATVAR-----rDIELIHEQLadagetgwegftal 109  
ident | | | | | |  
Sbjct eRAELCGSARYK-----dTVGDLDFLVAsregerAVEGFVRL-----pQ 220  
DSSP 1EEEEHHHLL-----1EELLEEEEEEL111hhHHHHHLL-----1L

DSSP ELL-LEEL111111111111LLEEEEEEEeelleeeEEEEEEELLLL1111eeeee1hhh1  
Query FTA-PEE1aapxpVKPRRFATAKLSyrgrafaTVPIEVSSVEAGNadqfdt1tsdalglv 168  
ident | | | | | |  
Sbjct VKEvYAKG-----KERATVFLKN-----GLQVDLrvVPPES----- 251  
DSSP EEEeEEL-----LLEEEL-----LLEEELHHH-----

DSSP 11111eEEEE11hHHHHHHHHHHHH11111111111HHHHHHH-----hHHHH  
Query gvpavavpcxtiPWQIaqklhavtavleekandraHDLVDLQ-----llegl 217  
ident  
Sbjct -----yGAGLQ-----yLtgSKAHSIRlralaqekgklseyg 284  
DSSP -----hHHHH-----hhlLHHHHHHHHHHHH11lee111

DSSP 11hhhhhhhhHHHHHHHH1111LLLLL1111hhhhhhhh1111111111hhHHHH  
Query lldadlxptrsACIAifearaqhpWPPRVatlphwpliyagalegldhlelartvdAAAQ 277  
ident  
Sbjct vfrgekriageTEEE-----vyAALGL-----pwippplredqGEVE 321  
DSSP eeelleeeel1LHHH-----hhHLLL-----1111hh1111LHHH

DSSP HHHH-----  
Query AVQR----- 281  
ident |  
Sbjct AALEgrlpkllelpqvkqdlqvstysdgqntleelweaaktmgrylavtdhspavrva 381  
DSSP HHHL1111111hhhl1leeeel1111111111hhhhhhhhhh11leeeeee1hhhl11

DSSP -----  
Query ----- 281  
ident  
Sbjct ggpspeealkrvgeirrfnethgppyllagaevdihpdgtldypdwlreldlvsvs 441  
DSSP 1111111hhhhhhhhhhhh11leeeeeee1111111111hhhhhh11leeeel11

DSSP -----  
Query ----- 281  
ident  
Sbjct rfnlpkadqtkrllkalenpfvhlahptarl1grrapieadweavfqakekgvaveid 501  
DSSP 11111hhhhhhhhhhhh1111le1111111111111111111111hhhhhhhhhh11leeeee

DSSP -----  
Query ----- 281  
ident  
Sbjct ggydrmdlpddlarmaygmglwislstdahqtdhrlrfmelavgtaqrawigpervlntld 561  
DSSP 1111111111hhhhhhhh1111leee1111111111111111111111111111111111

DSSP hhhhhhh1111  
Query fvaridratkr 292  
ident  
Sbjct yedllswlkar 572  
DSSP hhhhhhhhh11

No 582: Query=mol1A Sbjct=2ihmB Z-score=4.6

[back to top](#)

DSSP -----  
Query ----- 0  
ident  
Sbjct smpayacqrpsplthhntllsealetlaeaagfeanegrllsfsraasvlkslpcpvasl 60  
DSSP 11111hh1111111111hhhhhhhhhhhhhh1111hhhhhhhhhhhhhh11111111h

DSSP -----  
Query ----- 0  
ident  
Sbjct sqlhglpyfgehstrviqellehgtceevkqvrCseryqtmk1ftqvfgvktanrwyq 120  
DSSP hh11111111hhhhhhhhhhhh1111hhhhhhhhhhhhhh11111111hhhhhhhh

DSSP -1111111111hhhhhhhhhhhh1111hhhhHHHHHHHHHHHHLLLL-11LLLLLEE  
Query -aapyspntlrsldr1tqvaerqgvfgrlqRHXIVVAQFAATLTD-dtGAPLLL 58  
ident  
Sbjct eglrtldelreppqrltqqkag1qyyqdlstpvRRADAEALQQLIEAAVRqt1PGATVT 180  
DSSP h11111hh111hh11hhhhhhhh1hhhh11leEHHHHHHHHHHHHHH1111LLEEE

DSSP EEHHHHHHHH1111111111LLEEEEL-----LLHHHHHHHHHHHH1111leeEE  
Query VKGSSLELrrgipdsrTSKDFATVAR-----RDIELIHEQLADAGetgwegftaIF 110



```

Query  IartvdAAAQ-----avQKRv----- 283
Ident  |
Sbjct  ktaiFhMWTQdppqdsqwdprnlsscfdkllaFFleclrtekLDHYfipkfnlfsqelidr 338
DSSP   hhhhhHhHhHh111hhhh1hhhhhhhhhhhhhhhhhhhh11LLLL111111111111111h

```

```

DSSP -----hHHhh1111
Query -----aridratkr 292
Ident
Sbjct  kskeflskkieyernngfpifdkl 362
DSSP   hhhhhhhhhhhhhhh111hhhh11

```

No 584: Query=mol1A Sbjct=1jpwA Z-score=4.6

[back to top](#)

```

DSSP -----LLL-----11LLLHHH
Query -----AAPY-----ssPPTNLRs 13
Ident
Sbjct  raipeltkllndedqvvvkaavmvhqlskkeasrhaimrspqMVsAivrTmqNTNDVET 60
DSSP   1hhhhhhhh1111hhhhhhhhhhhh11hhhhhhhh11hHHHHhhhhhhHLLLLLH

```

```

DSSP HHHHHHHHHHLL-----11hHHHHHHHHHH-----hhh
Query LRDRLTQVAERQG-----vfgRLQRHVAXIVV-----aqf 44
Ident  |
Sbjct  ARCTAGTLHNLSHhregllaifksgGIPALVKMLGSPvdsvlfyaittlnlllhqegak 120
DSSP   HHHHHHHHHHLL1hhhhhhhh11HHHHHHHHLLL1hhhhhhhhhhhhhhhh111hh

```

```

DSSP hhl11111111eEEEH-----HHHHHHHLL11111111leeeell1hhhhhhhh
Query aatltdtdgapllLVKG-----GSLELRRGipdsrtskdfatvarrdieliheqla 96
Ident  |
Sbjct  mavrlagglqkmvALLNktvklflaITTDCLQIL----- 154
DSSP   hhhh11hhhhhhHHH111hhhhHHHHHHHH-----

```

```

DSSP hhhh1111leeeell1leell11111111leeeeeeeeeleeeeeeeeeell111111
Query dagetgwegftaiftapeeiaapgxpvkprftaklsyrgrafatvpievssveagnadq 156
Ident
Sbjct
DSSP

```

```

DSSP leeeellhhhh11111leeeellHHHHHHHHHHH11111111LLLHHHHHHHHH
Query fdtltsdalglvgvpaavavpcXTIPWQIAQKLHAVtavleepkanDRAHDLVDLQLEG 216
Ident  |
Sbjct  -----aygnqesklilaSGGPQALVNIMRTY-----TYEKLLWTTSRVLK 195
DSSP   -----h11hhhhhhhhHLLHHHHHHHHHH-----LLHHHHHHHHHH

```

```

DSSP HL--LHHHHHHHHHHhhhhhh111111LLL111hhhhhhhh11111111LHHH
Query LL--LDADLXPTRSACiaifearaqhpwPRVATlphwpliyagalegldhlelarTVDA 274
Ident  |
Sbjct  VLsvCSSNKPAIVEAG-----gmqaLGLHLT-----dPSQR 226
DSSP   HH11LLLHHHHHHHLL-----hHHhhHHHLL-----1LLHH

```

```

DSSP HHHHHHHHHHHHHHLLL-----
Query AAQAVQRFVARIDRATKR----- 292
Ident  |
Sbjct  LVQNCLWTLRNLSDAATKqegmegl1gltlvqllgsddinvvtcaagilsnltcnnyknkm 286
DSSP   HHHHHHHHHHHHLLL1111hhhhhhhhhh1111hhhhhhhhhhhh1111hhhh

```

```

DSSP -----
Query ----- 292
Ident
Sbjct  mvcvqggiealrvrtvragdreditepaicalrhltstrhqaemaqnavrlyhglpvvk 346
DSSP   hhhh11hhhhhhhhhh111hhhhhhhhhhhh111111hhhhhhhhhh111hhhhhh

```

```

DSSP -----
Query ----- 292
Ident

```



```

Sbjct psrnrfvnaieraaiaaiaaarksrayrsaarsieeinrtgipkvkgiaaeisdararsg   00
DSSP 11hhhhhhhhhhhhhhhhhhhh1111hhhhhhhhhhhhhhhhhhhh1111111111hhhhhhhhhhhhhhhhhhhh

DSSP ----LLLL-LLLL11HHHHHHHH-----
Query ----AAPY-SSPPtnLRSLRDR----- 17
ident
Sbjct tfapLEAAaGQLP--PGLDLLgvrglgpkkirslwlagidslerlreaaesgelagkkg 118
DSSP 11hhHHHHHHHLL--HHHHHHHL11111hhhhhhhhhh11111hhhhhhhhhh1111111111

DSSP -----hHHHHhh1111hHHHHHHHHHHHHHHHHHHLL11111LLEEEEEHHHHHHHHhh1
Query -----ltqvaerqgvvFGRLQRHVAXIVVAQFAATLddtgAPLLLKGGSSLELrrg 70
ident
Sbjct fgaksaatilenvvfIfearQRQSLRAGLAVAEEELAGA--1tDLSAPAGDVRRLG--- 172
DSSP 11hhhhhhhhhhhhhhhhhhLLEEHHHHHHHHHHHHHHHHH--1hHHLLEELHHHHHHLL---

DSSP 11111LLEEEEEEEL---1LHHHHHHhhhhhhhh1111eeeeeLLEEL11111111LEE
Query ipdsrTSKDFATVAR---rDIELIHEqladagetgwegftaiftAPEEIIaagpxpvkPRR 127
ident
Sbjct ---eTVRAAEELTVTgtpdDVLARLP-----ELTVQ-----VLS 202
DSSP ---1EELLEEEEEE11hhHHHHHLL-----LLEEL-----LEE

DSSP EEEEEeellееееEEEEEEEEELLLL1111eeeee1hHHHh11111eeeee1hHHHHHh
Query FTAK1syrgrafaTVPIEVSSVEAGNadqfdtltsdalglvgvpaavavpcxtiPWQIaq 187
ident
Sbjct GDYE-----GVPVEIACAPAEA-----rgALDL-- 225
DSSP EEEL-----LEEEEEEEELLLL-----hhHHHh---

DSSP hhhhhh111111111111hhHHHHHHHH-----h11hhhhhhhhHHHHhh
Query klhavtavleepkandrahd1VDLQLEG-----111dadlxptrSACIaif 234
ident
Sbjct -----1rsgeHFAGQVQAAaqargftltagl1srgdevlptpTEAV--- 266
DSSP -----h11hHHHHHHHHHHhh111leeeleeeel1eeel11LHHH---

DSSP hhh1111LLELL11111hhhhhhHHLL111111LHhH-----
Query earaqhpWPPRvatlphwpliyagALEGLdhle1aRTVDA----- 274
ident
Sbjct ---vfhALDLP----frpaeyrEPEH-----dDLWQTlpdpaelvtvgd1rgmihth 311
DSSP ---hhhHLLL----111hhH1LHhH-----1LLELL111hhh111hhh1leeeel

DSSP -----
Query ----- 274
ident
Sbjct stwsdggasiremaeatl1lghef1gtadhsraayyngltierlreqlkeirelqragl 371
DSSP 11111111hhhhhhhhhh111leeeleee1111hh1111hhhhhhhhhhhhhhhhhh111111

DSSP -----
Query ----- 274
ident
Sbjct pivagsevdi1ddgsldfpddvlgeldyvsvhsnftldaarqterliravshplvtvl 431
DSSP leeeleeeel111111111hhhh111leeeel11111111hhhhhhhhhhhh111111lee

DSSP -----
Query ----- 274
ident
Sbjct ghatgr1llrrrgyalddavlgaceangtveinanaarldldwrealrwrerkfain 491
DSSP 1111111111111111hhhhhhhhhh1leeeel11111111hhhhhhhh1111leee

DSSP -----hhhhhhhhhhhhhh1111
Query -----aaqavqrfvaridratkr 292
ident
Sbjct tdahvpgg1rdarygvmqarkagltpahvvnslgraefldfvarqraarg 541
DSSP 11111hhhhhhhhhhhhhh1111hh1hh11hhhhhhhhhhhh1111

```

No 587: Query=mol1A Sbjct=3auoB Z-score=4.5







```

Query aigivgvpavavpcxtirwQIAQKInavtavieepkanrandLVLLQ----- 212
Ident |
Sbjct -----pYAIFFHT-----gPVSYLiriraalkkny 135
DSSP -----hHHHHHHH-----LHHHHHHhhhhhh1111

DSSP ----hHHhh11hHHHHHHhHHHHhhhhhh1111LLLLL11111hhhhhhhh111111
Query ----lleg11ldADLXPtrSACIaifearaqhpWPPRVat1phwpliyagalegldhle 267
Ident |
Sbjct klnqyglfknqtlVPLKI--TTEK----elikeLGFTY----- 167
DSSP eeelleeeelleELLL--LHH----hHHhHLLL-----

DSSP 1111hhhhhhhhhhhhhhhh1111
Query lartvdaaaqavqrfvaridrskr 292
Ident |
Sbjct -----ripkkrl 174
DSSP -----1hhhh1

```

No 590: Query=mol1A Sbjct=4wc7A Z-score=4.5

[back to top](#)

```

DSSP 111111111hhhhhhhhhhhhhh1111hhhhhhhhhhhhHHHLLLL11LLEEEE
Query aapysspntnlrslrdrltqvaerqgvfgrlqrhvaxivvaqFAATLTDDtgAPLLLVK 60
Ident |
Sbjct -----MVGQIAKE-mGLRAYIV 16
DSSP -----LHHHHHHH-1LLEEEEE

```

```

DSSP HHHHHHHHLL1111LLEEEEEELHHHHHHHHHHHHhh1111eeeeELLEE1111
Query GGSSLELRRIpdsrSKDFATVARRDIEIIEHQLADAGEtgewegftaiFTAPEEiaapg 120
Ident || | | | | | | | | | |
Sbjct GGVVRDILLGK---eVWDVDFVVEGNAIELAKELARRHG-----VNVHPF---- 58
DSSP LHHHHHHHLL---1LLEEEEEELHHHHHHHHHHHLL-----LLEEE----

```

```

DSSP 11LLEEEEEEEeeelleeeEEEEEEELL---LLL-----1
Query xpVKPRRFtAK1syrgrafaTVPIEVSSVEA---GNAD-----q 156
Ident |
Sbjct peFGTAHLKIG-----KLKLEFATARRetepASLKedlirrdftinamaisvnled 109
DSSP 11LLEEEEEEL-----LEEEEEELL1111LHHhhhh1111hh1lee1111

```

```

DSSP LEEEeelhhhh11111leeeelLHHH-----hhhhhhHLL11111LLLhh
Query FDTLtsdalglvgvpaavavpcxTIPW-----qiaqklhaVTAVleepkaNDRAhd 207
Ident || | | | | | | | | | |
Sbjct YGTL-----IDYFgg1rd1kdkvirvlhvpvSFIE----dPVRI-- 143
DSSP LLE-----ELLLhhhhhh1lee11111HHHH-----1LHH--

```

```

DSSP hhhhhhhhh11hhhhhhhhhhhhhh11111111111hhHHHHHLLL111
Query lvd1qlleg11ldadlxptrsaciaifearaqhpwpprvat1phwpliyAGALEGLDhle 267
Ident |
Sbjct -----1RALRFAGRLN--- 154
DSSP -----hHHHHHHHLL---

```

```

DSSP 11LHHHHHHH-----
Query laRTVDAAAQA----- 278
Ident |
Sbjct -fKLSRSTEKl1kqavnlg1keapgrlineiklalredrfleilelyrkyrvleeie 213
DSSP -1EELHHHHHHhhhhhh11hhhh11hhhhhhhhhh1111hhhhhhhh11hhhh11

```

```

DSSP -----
Query ----- 278
Ident |
Sbjct gfwnekvlqklyalrkvdwhalefseeridygwyl1lil1snldyergkhfleemsap 273
DSSP 11111hhhhhhhhhhhhhhhhhh11hh1111hhhhhhhh1111hhhhhhhh1111

```

```

DSSP -----
Query ----- 278
Ident |

```

```

DSSP -----hhhhhhhhhh1111
Query -----vqrfvaridratkr 292
ident
Sbjct klrkvklpkkieelkkkelgerieelkreimn 367
DSSP 11111111hhhhhhhh1111hhhhhhhhhhhhhhhh

```

No 591: Query=mol1A Sbjct=1vj7A Z-score=4.4

[back to top](#)

```

DSSP -----
Query ----- 0
ident
Sbjct inltgeevvalaakymnetdaafvkkaldyataahfyqvrksgepyivhpiqvagiladl 60
DSSP 1111hhhhhhhhhh11hhhhhhhhhhhhhhhh1111111111hhhhhhhhhhhhhh

```

```

DSSP -----
Query ----- 0
ident
Sbjct hldavtvacgflhdvvedtditldniefdgkdvrdivdgvtklghrkmlmamskdirvi 120
DSSP 111hhhhhhhh11hhhh1111hhhhhhhhhhhhhhhh111111111111hhhh

```

```

DSSP -----111111111hhhhhhhhhhhhhhhh
Query -----aapyssptnlrsldrldtqvaer 24
ident
Sbjct lvkladrlnmrtrlkqerisretmeiyaplahrlgisrikweledlafrylnetefykis 180
DSSP hhhhhhhhhhh111hhhhhhhhhh1hhhhhh111hhhhhhhhhhhhhhhh11hhhhhhhh

```

```

DSSP LLLLHHHHHHHHHHHHHHHHHHHH-LLLL11LLLLEEEehhHHHHhh11LLL-----
Query QGVVFGRLQRHVAXIVVAQFAA-TLTDdtGAPLLLvkkgSSLElrrgiPDSR----- 75
ident | | | | |
Sbjct HMMNEKRREREALVDDIVTKIKsYTTE--QGLFGDV--yGRPK---hIYSIyrkmrddk 232
DSSP HHHHHLHHHHHHHHHHHHHHHHHH--LLLLLEE--eELL---1HHHHhhhhhhhh

```

```

DSSP -----1LLEEEEEEL--LLHHHHHHHHHHhh111leeEEEL--LLEEL--LLLL11
Query -----tSKDFATVAR--RDIELIHEQLADAgeTgwegftAIFT--APEEI--AAPGxp 122
ident | | | | |
Sbjct krfdqifdLIAIRCVMetqSDVYAMVGYIHEL-----WRPmpgRFKDYiaAPKAng 283
DSSP hh1111hhLEEEEEEL1hHHHHHHHHHHHH-------LLLL1LLEEL11LLL11

```

```

DSSP 1LLEEEEEEEe1leeEEEEEEEEELL111111leeeelhhhh11111leeeel1hh
Query vKPRRFTAkLSyrgraFATVPIEVSSVEagnadqfdtltsdalglvgvpaavavpcxtip 182
ident | | | | |
Sbjct yQSIHTTVYGP----KGPIETIQRITKE----- 306
DSSP 1LLEEEEEEL-----LLEEEEEEEHH-----

```

```

DSSP hhhHHHHHhHH1111111111hhhhhhhhhh11hhhhhhhhhhhhhhhh1111
Query wqiAQKLhAVTAveepkandrahdldvlqllegllldadlxptrsaciaifearaqhpw 242
ident | |
Sbjct mhqVAEY-GVAA----- 317
DSSP hhhHHHH-LLLL-----

```

```

DSSP 11111LLLHHhhhhhhhh1111111111hhhhhhhhhhhhhhhh1111
Query pprvaTLPHWpliyagalegldhlelartvdaaaqavqrfvaridratkr 292
ident
Sbjct ----NWIKE-----vel 326
DSSP ----LHHHH-----hhl

```

No 592: Query=mol1A Sbjct=1zela Z-score=4.4

[back to top](#)

```

DSSP 111111LLL-----

```

Sbjct --amvvSPAGadrriptwasrvvsgIardrpvvvtkedItqrIteagcgrpdpsaireIr 58  
DSSP --leeeLLLLLllllllhhhhhhhhhhhhllllleehhhhhhhhhllllllhhhhhhhh

DSSP -----hhhHHHHhhhhhhllllhhhhhhHHHHHHHHHHLLllllLLLL  
Query -----lrsLRDRltqvaerqgvfgrlqrhVAXIVVAQFAATltdtGAPL 56  
ident

Sbjct rigwlvqlpvkgtwafIPPGE-----aaISDPYLPLRSWLA---rdQNAG 100  
DSSP hhlleee1111leee1LLL-----leeELLLLHHHHHHHH---h1LLL

DSSP EEEEEHHHHHHHHllllLLLL-LEEEELLLhHHHHHHhhhhllllleeeel1lee  
Query LLVKGSSLELRrgipdSRTSK-DFATVARRDIeLIHEQLadagetgwegftaiftapee 115  
ident | | | | |

Sbjct FMLAGASAAWHLG--yIDRQPDgRIPIWLPPAK-RLPDGL----- 137  
DSSP LEELHHHHHHHH--11LLL1LEEEELLLL-LLLHHH-----

DSSP 11111111leeeeeee1leeeeeeEEEEELLLL--1LLE-----  
Query iaapgxpvkprftaklsyrgrafatvPIEVSSVEAG--nADQFD----- 158  
ident |

Sbjct -----asYVSVVRIPWNaadTALLAprpallvrrrldlva 172  
DSSP -----1LEEEELLLL11HHHHL11hhhhhh111111

DSSP EEEE1hhhh11111leeEEELLHHHHHHHHHHhh1111111111HHHHHHHHHHLL  
Query TLTSdalglvgvpaavaVPCXTIPWQIAQKLHAVtavleepkandraHDLVDLQLEGLL 218  
ident | | | | |

Sbjct WATG-----LPALGPEALLVQIATRP-----asfgPWADLVPHLDDL 210  
DSSP LLL-----LLLLHHHHHHHHHHLLH-----hhl1LHHHHHHHHHH

DSSP LhHHHHHHHHHHHHHHhh1LLL-----  
Query LdaDLXPTRSACiAIFearaQHPWP----- 244  
ident |

Sbjct AdcSDERLERLL-SGRP---TSAWQRasylldsgepargqallakrhtevmpvtrftta 266  
DSSP H11LHHHHHHHH-LLL---HHHHHHhhhhhh111hhhhhhhh11111111leee11

DSSP -----LLLL11hhhhhhhh11111111LLHHHHhhhhhhhhhh1111  
Query -----RVATlphwpliyagalegl dhlelARTVDaaaqavqrfrvaridratkr 292  
ident |

Sbjct hsgesvwapeyqLVDE-----lvvp1LRVIG-----k 293  
DSSP 1111leeehh1EEEL-----lhhhhHHHH-----1

No 593: Query=mol1A Sbjct=5cwuA Z-score=4.3

[back to top](#)

DSSP 11111111hhhhhhhhhhhh111hhhhhhhhhhHHHH11111111EEEE  
Query aapyspntlrsldrldtqvaerqgvfgrlqrhvaxivvaQFAATltdtgap1LLVK 60  
ident

Sbjct -----PRDV--th11alvsSAIH 16  
DSSP -----LLL--lhhhhhhHHHH

DSSP -----HHHHHHHHLL11111111leeeel1hhhhhhhhhhhh111lee  
Query -----GGSSELRRGipdsrtskdfatvarrdieliheqladagetgwegft 107  
ident |

Sbjct avenpfgandlpyFRTLLKILFV----- 39  
DSSP 11111111hhhhHHHHHHHH-----

DSSP eeel1lee11111111leeeeeeeleeeeeeeeeel11111LLEeeee1hhhh  
Query aiftapeeiaapgxpvkprftaklsyrgrafatvpievssveagnaDQFDtltsdalgl 167  
ident |

Sbjct -----vlraakqiTQQV----- 51  
DSSP -----hhh1111HHHH-----

DSSP 11111leeeelLHHH-HHHHHHHHHLL1111LLLHHHHHHHHHHLL-----lh  
Query vgvpaaavpcxTIPW-QIAQKLHAVTAVLeepkANDRAHDLVDLQLEGLL-----ld 220  
ident | | | | |

Sbjct -----1TILDrVVARCFRALAALV---TTAPEDLALITAILQAClsvpgieq 96  
DSSP -----hHHHHLHHHHHHHHLLLL-----LLLLLHHHHHHHHHHhh1111hh









```

DSSP HHHHHHHhh11111LLEEEEEEL-----LHHHHHHhhhhhh1111eeEEELLEE
Query GGSLELRRgipdsrTSKDFATVAR-----rDIELIHEQLadagetgwegftAIFTAPEE 115
ident | |
Sbjct GSARRYK-----dTVGDLDLFLVAsregerAVEGFVRL-----pQVKEVYAK 220
DSSP HHHHLLL-----LEELLEEEL11111HHHHLLL-----LLEEEL

```

```

DSSP L11111LLEEEEEEEee11eeeEEEEEEELLLL1111eeeee1hhhh1111lee
Query IaapgxpVKPRRFTAKLsyrgrafaTVPIEVSSVEAGNadqfdt1tsdalglvgvpaava 175
ident | |
Sbjct G-----KERATVFLKN-----GLQVDLRVPPES----- 244
DSSP L-----LLEEELLL-----LLEEELLLLHHH-----

```

```

DSSP ee11hHHHHhhhhhh1111111111HHHHHHH-----hhhh11hHHHH
Query vpcxtiPWQIaqklhavtavlepkandraHDLVDLQ-----lleg11dADLX 224
ident |
Sbjct ----yAGLQ-----y1tgSKAHSIR1ralaqekg1klseygvfrGEKR 284
DSSP ----hHHHHH-----hhh1LHHHHhhhhhh11lee11leeLLEE

```

```

DSSP hhHHHHhhhhhh11111LLELLL1111hhhhhhhh111111LHHHHHH-----
Query ptrSACiaifearaqhpPPRVAt1phwpliayagalegldhle1aRTVDAAAQ----- 277
ident | |
Sbjct --IAGE-----teevyALGLP-----wippplredQGEVEAALegrlpk1 324
DSSP --EELL-----1hhhhHHL11111-----111hh111LHHL11111

```

```

DSSP -----
Query ----- 277
ident -----
Sbjct lelpqvgd1qvstysdgnqtleelweaaktmgyrylavtdhspavrvgpspeealkrv 384
DSSP 11hh1lee111111111111hhhhhhhh11lee1lee11111111hhhhhh

```

```

DSSP -----
Query ----- 277
ident -----
Sbjct geirrfnethgppyllagaevdihpdgtldypdv1reld1vlsvhsrfnlpkadtqr 444
DSSP hhhhh111111eeleee1111111111hhhh1111ee11111111hhhhhh

```

```

DSSP -----
Query ----- 277
ident -----
Sbjct 11kalenp1vhlahptarl1lrrapieadweavfqakekgvaveidgydrmdl1pddl 504
DSSP hhh111111lee1111111111111111hhhhhhhh1111eeee11111111hh

```

```

DSSP -----hhhhhhhh1111
Query -----avqrfvaridratkr 292
ident -----
Sbjct armaygmlwis1stdahqtdh1rfmelavgtaqrawigperv1ntldyed11swlka 562
DSSP hhh11111lee11111hhhhhhhhhhhh11111111hh11hhhhhh

```

No 598: Query=mol1A Sbjct=4wc6A Z-score=4.3

[back to top](#)

```

DSSP 111111111hhhhhhhhhhhh1111hhhhhhhhhhHHLLLLL11LLEEEE
Query aapysp1n1rslrd1rtqvaerqgvfgrlqrvaxivvaqFAATLTDDtgAPLLLVK 60
ident |
Sbjct -----MVGQIAKE-mGLRAYIV 16
DSSP -----LHHHHHHH-1LLEEEL

```

```

DSSP HHHHHHHL11111LLEEEEEELLLHHHHHHHHHHh1111eeEEELLEE1111
Query GGSLELRRGIpdsrTSKDFATVARRDIELIHEQLADAGEtgwegftaiFTAPEEiaapg 120
ident || | |
Sbjct GGVVRDILLGK----eVWVDVVFVEGNAIELAKELARRHG-----VNVHPF----- 58
DSSP LHHHHHHL11111LLEEELLLHHHHHHHHHH111111LLEE-----

```

```

DSSP 11LLEEELLee11eeeEEEEELLLL-----LLLL-----

```

```

Sbjct perGIAHLKIG-----AKLEFAIAKketepASLkeaiirrat tinama isvniea 109
DSSP 11LLEEEEEEL-----LEEEEEELLL1111LLHHhh1111hhhllee1111

DSSP LLEEeeelhhhh11111leeeelLHHH-----hhhhhhhHLL11111LLLh
Query QFDt1tsdalglvgvpaavpvcxTIPW-----qiaqk1haVTAVleepkaNDRAH 206
ident |
Sbjct YGTL-----IDYFgg1rd1kdkvirvlhvpSFIE-----dPVRI- 143
DSSP LLE-----ELLL1hhhhhh1lee11111HHH-----1LLHH-

DSSP hhhhhhhhhhh11hhhhhhhhhhhhhhhhhh111111111111hhHHHHHHLLLL11
Query dlvd1qlleg11dad1xptrsaciaifearaqhpwprvat1phwp1IYAGALEGLDh1 266
ident |
Sbjct -----IRALRFAGRLN-- 154
DSSP -----hHHHHHHHLL--

DSSP 111LLHHHHHHH-----
Query elarTVDAAAQA----- 278
ident
Sbjct --fKLSRSTEKLLkqavnlgllkeapgrlineiklalredrfleilelyrkyrvleeii 212
DSSP --1EELHHHHHHhhhhhh11hhhh11hhhhhhhhhh1111hhhhhhhhhh11hhhh1

DSSP -----
Query ----- 278
ident
Sbjct egfqwnekv1qklyalrkvvdwalefseeridygwly1111isnldyergkhfleemsa 272
DSSP 111111hhhhhhhhhhhhhhhhhhhh111111hhhhhhhh111111hhhhhhhhhh111

DSSP -----
Query ----- 278
ident
Sbjct pswvretykmfklglkskeelkkakenyevyrllkplhtsvlllmlleeelkekiklyl 332
DSSP 1hhhhhhhhhh11hhhhhhhh1111hhhhhhhh1111hhhhhh1111hhhhhhhhhh

DSSP -----hhhhhhhh1111
Query -----vqrfvaridratkr 292
ident
Sbjct eklrkvklpkeieelkkgkelgerieelkreimn 367
DSSP h11111111hhhhhhhh11hhhhhhhhhhhhhh1

```

No 599: Query=mol1A Sbjct=3c2gA Z-score=4.2

[back to top](#)

```

DSSP -----LLL--1L
Query -----AAPY--sS 6
ident
Sbjct xnitqaaeqairlwfntpdpxqrlxaktirtwirqdkfaqvdaqxpcvqQILNiiyD 60
DSSP 11hhhhhhhhhhhh11hhhhhhhhhhhhhhhh111111hhhhhhhhHHHHhhH

DSSP LLL-----LHHHHHHHHHHHHHLL-----
Query PPT-----NLRSLRDRLTQVAERQG----- 26
ident |
Sbjct GLKpqpvlpisyYAQLWYNLLDILRRFTFlpiispyihqvqxfcrengpqdfrelic 120
DSSP HHL111111hhHHHHHHHHHHHHHHHH11hhhhhhhhhh1111111111hhhhhh

DSSP -----11hHHHHHH-----hhhhHHHH1111111111EE
Query -----vfvGRLQRHV-----axivvAQFAAt1tdtgap1LL 58
ident |
Sbjct n1islnwqkdphxkchcANQVFQIfnciixgvkneklrtefaqhLKFEK-----lvGT 172
DSSP hh11hhhh1111hhHHHHHHHHhhhh1111hhhhhhhhHLLHH-----hHHH

DSSP EE-----hHHHHHHHLL11111111leeeel11hhhhhhhhhhhh1111e
Query VK-----gSSLELRRGipdsrtskdfatvarrdieliheqladagetgwegf 106
ident |
Sbjct LSeyfnpqvhpgxinPAIFIIFRF----- 196
DSSP HHHhh11111hh11LHHHHHHHH-----

```





```

query cx11rw-----qiaqklnav1av1eepkanvkanv1va1q11eg111aa1xptrs 228
ident
Sbjct t1IDYFgg1rd1kdkvirvlhvpvSFIE----dPVRI----- 141
DSSP 1eELLL1hhhhhh11ee111111HHHH-----1LHHH-----

DSSP hhhhhhhhh1111111111111111hhHHHHHHLLLL111111LLHHHHHH-----
Query aciaifearaqhpwpprvatlphwp1IYAGALEGLDhlelaRTVDAQA----- 278
ident
Sbjct -----1RALRFAGRLN----fKLSRSTEK1kqavnlg11 172
DSSP -----hHHHHHHHHHL----1EELHHHHHHhhhhhh1111

DSSP -----
Query ----- 278
ident
Sbjct keapgrlineiklalredrfleilelyrkyrvleeiegfqwnekv1qklyalrkvvdw 232
DSSP 1111hhhhhhhhhh1111hhhhhhhhhh11hhhh111111hhhhhhhhhhhhhhhh

DSSP -----
Query ----- 278
ident
Sbjct halefseeridygwlyl1l1isnldyergkhfleemsapsvwretykfmkfglgs1keel 292
DSSP hhhh11111111hhhhhhhh1111hhhhhhhhhh1111hhhhhhhhhh11hhhhhhhh

DSSP -----hhhhhhhhhh1111
Query -----vqrfvaridratkr 292
ident
Sbjct kkakenyevyrllkplhtsvll11mleee1kekikyleklrvkerieelkreimnk 350
DSSP h1111hhhhhhhh1111hhhhhh111111hhhhhhhhhh11hh11hhhhhhhhhh11

```

No 602: Query=mol1A Sbjct=4wc0B Z-score=4.2

[back to top](#)

```

DSSP 1111111111hhhhhhhhhhhhhh1111hhhhhhhhhhhhHHHLLLL1LLLEEEE
Query aapyspntlrs1rdrltqvaerqgvfgrlqrhvaxivvaqFAATLTDDtGAPLLLK 60
ident
Sbjct -----MVGQIAKE-MGLRAYIV 16
DSSP -----LHHHHHHH-HLLEEEEE

DSSP HHHHHHHHLL111111LLLEEEELLLHHHHHHHHHHHHhh1111eeeEELLE1111
Query GGSLELRRIpdsr1SKDFATVARRDIELIHEQLADAGEtgewgftaiFTAPEEiaapg 120
ident || | | | |
Sbjct GGVRDILLGK----eVWDVDFVVEGNAIELAKELARRHG-----VNVHPF----- 58
DSSP LHHHHHHHLL----1LLEEEEEEELLLHHHHHHHHHHHL-----LLEEE-----

DSSP 11LLEEEEEEeelleeeEELLLL--LLL-1leeeelhhhh1111leee
Query xpVKPRRF1AK1syrgrafaTVPIEVSSVEA--GNAD-qfdt1tsdalglvgvpaavavp 177
ident
Sbjct peFGTAHLKIG-----KLKLEFATARRRepASLKed1irrdftinamaisvnedyg 109
DSSP 11LLEEEEEEEL-----LEEEEEEELLL11LLHHhhhh1111hh11lee111111

DSSP e1LHHH-----hhhhhhHHLL111111LLLhhhhhhhhhh11hhhhhhhh
Query cxTIPW-----qiaqk1haVTAVleepkaNDRAhd1vd1qlleg11dad1xptrs 228
ident
Sbjct t1IDYFgg1rd1kdkvirvlhvpvSFIE----dPVRI----- 141
DSSP 1eELLL1hhhhhh11ee111111HHHH-----1LHHH-----

DSSP hhhhhhhhh1111111111111111hhHHHHHHLLLL111111LLHHHHHH-----
Query aciaifearaqhpwpprvatlphwp1IYAGALEGLDhlelaRTVDAQA----- 278
ident
Sbjct -----1RALRFAGRLN----fKLSRSTEK1kqavnlg11 172
DSSP -----hHHHHHHHHHL----1EELHHHHHHhhhhhh1111

DSSP -----
Query ----- 278
ident

```





```

query GGSsIeIrrgIpsrTUSKDFAIvAK-----KDIELIHEQLADAGetgwegTtAIFtARE 114
ident
Sbjct FV-gsyarntwLkgsleIDVFLLPeefskELRERGLEIGKAVL-----DSYEIRY 92
DSSP EE-hhhh1111111111111111EEEEEEEL1111hhHHHHHHHHHHHLLL-----LEEEEL

```

```

DSSP EL1111111111EEEEEEElleeEEEEEEEEELLLL1111leeeelhhhh1111le
Query EIaapgxpvkpRRFTAKLSyrgraFATVPIEVSSVEAGnadqfdlttsdalglvgvpaav 174
ident
Sbjct AH-----PYVHGvVK----GVEVDVvPCYKlKE----- 116
DSSP LL-----LEEEEL-----LEEEEEEELLLL-----

```

```

DSSP eeee11hhhhhhHHHHHHh1111111111LLHhhhhhhhhhh11hhhhhhhhhhhhhh
Query avpcxtipwqiaQKLHAVtavleepkanDRAHdlvd1qlleg11ldadlxptrsaciaif 234
ident
Sbjct pkniksavdrtpFHHKWL-----EGRI----- 138
DSSP 1111111111hhHHHHHH-----HHHL-----

```

```

DSSP hhh1111111111111111hhHHHHHHLLL-LLLL-----111LHH
Query earaqhpwpprvatlphwplIYAGALEGL-DHLE-----larTVD 273
ident
Sbjct -----KKGKENEVRLKGFkangiYgaeykvrgfsgylce11IVF 178
DSSP -----LLLHHHHHHHHHHHHhh11111111111111111111111111hhhhhhHH

```

```

DSSP HH-----hhHHHH-----hhHHHH-----
Query AA-----aqAVQR-----fvARID----- 287
ident
Sbjct YGsfletvknarrwrrtviDVAKgevrkgeeffvvdpvDEKRNvaanlsldnlarfvhl 238
DSSP HL1hhhhhhhh111111leeeELLLleee1111leee1111LLL111111hhhhhhhhhh

```

```

DSSP -----
Query ----- 287
ident
Sbjct crefmeapslgffkpkhpleieperlrkiveergtavfavkrkpdvddnlypqleras 298
DSSP hhhhhhh111hhhh111111111111hhhhhhhhhh1leeeeeee111111hhhhhhhhhh

```

```

DSSP -----
Query ----- 287
ident
Sbjct rkifeflerenfmlrsafkasefcyllfecqikeisrvfrmgpqfedernvkkflsr 358
DSSP hhhhhhhhh1111leeeeeee11leeeeeee111111leeeeeee111hhhhhhhh111

```

```

DSSP -----
Query ----- 287
ident
Sbjct nrafrpfiengrwwafemrkfttpeegvrsyasthwhtlgknvgesireyfeisgek1f 418
DSSP 11111leee1leeeeeee111111hhhhhhhhhh1hhhh1hhhhhhhhhh1leeehhhh11

```

```

DSSP -----h1111
Query -----ratkr 292
ident
Sbjct kepvtaelcemmgvkd 434
DSSP 1111hhhhhhhh1111

```

No 606: Query=mol1A Sbjct=3upsA Z-score=4.1

[back to top](#)

```

DSSP 1111111111hhhhhhhhhhhhhh1111hhhhHHHHHHHHHHHHHLLL111111LEEEE
Query aapyspntnlrslrdrltqvaerqgvfgrlQRHVAXIVVAQFAATLtddtgapLLLVK 60
ident
Sbjct -----FDPEXLLKLVTDSDLDD-----QALEI 22
DSSP -----1LHHHHHHHHHHHHHH-----LEEE

```

```

DSSP HHHhhhhhh111LLL---1LEEEEL--LHHHHHHHHHHHHH111EEEEELLEE
Query GGSslelrrgipDSRT---sKDFATVARR--DIELIHEQLADAGETGwegFTAIFTAPEE 115
ident

```



DSSP 11111111LEEEEEEEeeellleeeEEEEEEELL11111111leeeelhhhh11111lee  
 Query iaapgxpvKPRRFTAK1syrgrafaTVPIEVSSVEagnadqfdtlttsdalglvgvpaava 175  
 ident  
 Sbjct -----paaDWVLLDAG-----DIIHILFRPE----- 93  
 DSSP -----111LEEEELL-----LEEEELHH-----

DSSP eeellhhhhhhhhhhhh1111111111hhhhhhhhhh11hhhhhhhhhhhhhhhh  
 Query vpcxtipwqiaqklhavtavleekandrahdldlqllegllldadlxptrsaciaife 235  
 ident  
 Sbjct -----vrsfy 98  
 DSSP -----hhhhh

DSSP HLLLLL1111111111hhhhhhhh1111111111hhhhhhhhhhhhhhhh1111  
 Query ARAQHPwpprvatlphwpliayagaleglhdhlelartvdaaaqavqrfvaridratkr 292  
 ident  
 Sbjct NLERXW-----gfgd 108  
 DSSP HHHHHL-----1111

No 607: Query=mol1A Sbjct=5hzdA Z-score=4.1

[back to top](#)

DSSP -----1111111111  
 Query -----aapyspoptn 10  
 ident  
 Sbjct vrllyscdacphavftthaallahaeehadllpdharlrriaqklnpvwnralnarrnti 60  
 DSSP 111ee111111lee11hhhhhhhhhhhh111hhhhhhhhhhhhhhhhhhhhhhhh

DSSP hhhhhhhhhhhhh1LLLHHHHHHHHHHHHHHHHHHLL111111LEEEEHhHHHHhh1  
 Query lrsldrldtqvaerqGVVFGRLQRHVAXIVVAQFAATLTddtgaPLLLVKggSSElrrg 70  
 ident  
 Sbjct tswgkkihvaarqDAGESKMQEAHRARAQLECVRRWH----DKARVF--IFGS---- 109  
 DSSP hhhhhhhhhhhhh1LLLHHHHHHHHHHHHHHHHHHHLL-----LLEEE--EELH----

DSSP 11LLL-----1LEEEEEE-----LLLHHHHHHHHHHHHHHLL1leeEELLEEL  
 Query ipDSRT-----sKDFATVA-----RRDIELIHEQLADAGETGwegftaIFTAPEEI 116  
 ident  
 Sbjct svAMGVwdgtadIDFAVVDvdamerqswPPEKNAVRSITELLRRVG-fsfvNLEPISHA 168  
 DSSP hhLLL111111EEEEEELhhhh1111LLLHHHHHHHHHHHHHHLL-1111LEEEELL

DSSP 11111111LEEEEEE-----  
 Query aapgxpvKPRRFTAKL----- 132  
 ident  
 Sbjct -----RVPIIKHHAsspdvvarsirfilngpatredrlllegsvrdavgptgvqqvww 221  
 DSSP -----LLEEEELL11111hhheeeel1111hhhhhhhhhhhhhh111leeeeee

DSSP -----eeLLEE---EEEEEEEEell  
 Query -----syRGRA---FATVPIEVSSve 150  
 ident  
 Sbjct nrtsdmsatlesttaavraamcspalasastrtkvpahDECRpelyNIDFDLSFR--- 278  
 DSSP 1111leeeeee11hhhhhhhh1111111111leeeel11LLL1hhHLEEEELL---

DSSP 111111leeeelhhhh111111leeeel1hhhhhhhhhhhh1111111111hhhhH  
 Query agnadqfdtlttsdalglvgvpaavpcxtipwqiaqklhavtavleekandrahdldvD 210  
 ident  
 Sbjct -----afgirnsT 286  
 DSSP -----1hhhhhhH

DSSP HHHhhhh11hhhhhhhhhhhhhhhh1111111111HHHHHHHHHHLL-----  
 Query LQLlegllldadlxptrsaciaifearaqhpwpprvatlphWPLIYAGALEGLD----- 264  
 ident | |  
 Sbjct LLR-----ky11SHPCARPGAIVLKdwsks 312  
 DSSP HHH-----hh1LLLHHHHHHHHHHhhhh







```

DSSR -----
Query ----- 288
ident
Sbjct liiklleirvandgmtacagtlsnltnntrnkqtvcshggidalvtairrlpeveev 335
DSSP hhhhhhhhh11111hhhhhhhhhhhhhhhh111hhhhhhhhhh11hhhhhhhhhh1111hhh

DSSP -----
Query ----- 288
ident
Sbjct tepalcalrhctarhslaeaaqselrfcqafpvildqletlrtpvikaalgvirnsallq 395
DSSP hhhhhhhhhhh11111hhhhhhhhhh111hhhhhhhh1111hhhhhhhhhhhhhh1111

DSSP -----
Query ----- 288
ident
Sbjct tnieltqeqtanghtavsltmdilrraitaieenpdiavdgvpwmgviegavsahqla 455
DSSP lhhhhhhhh1111111hhhhhhhhhhhhhhhh1111eelleehhhhhhhhhhhhhhh1

DSSP -----
Query ----- 288
ident
Sbjct nhpavaaacddigqvgnceppfldllhrllahprlgsmdevlereilglllyqlskrp 515
DSSP l1hhhhhhhhhh1111111111hhhhhhhhhh11hhhh11111hhhhhhhhhhhhhh11h

DSSP -----1111
Query -----atkr 292
ident
Sbjct dgaravestgvsallmesrgsqyksvvtyangvlsnlkrqds 557
DSSP hhhhhhh1111hhhhhhhh1111hhhhhhhhhhhhhhhhhh1

```

No 611: Query=mol1A Sbjct=4txzA Z-score=4.0

[back to top](#)

```

DSSP 1111111111hhhhhhhhhhhhhh1111HHHHHHHHHHHHHHHHHHLL---LLL-----
Query aapyspntnlrslrdrltqvaerqGVVFGRLQRHVAXIVVAQFAATL---TDDT----- 52
ident
Sbjct -----twfnfhytytrndglmgklvLTDEEKNNLKALRKIIRLRTRDVfeeAKGIakavk 55
DSSP -----lee1hhhhhh11111hhhhhh1111HHHHHHHHHHHHHHHHHHhhHHHHhhhhhh

DSSP -----LLLLEEEEHHhhhhhh
Query -----GAPLLLKGGsslelr 68
ident
Sbjct ksaltfeiiqekvsttqikhlsdseqrevakliyemddardelGLTPRFWTQ----- 109
DSSP h1111hhhhhhhh111hhhh11hhhhhhhhhh111hhhhhhhhLLLLEEEE-----

DSSP h111LLL-----1LEEEEEEL---1LHHHHHHHHHHHHHH---LLLeeeEELL
Query rgipDSRT-----sKDFATVAR---rDIELIHEQLADAGET-GWEGftaIFTAP 113
ident
Sbjct gsfqYDTLnrpfqpgqemdIDDGTYPmpikiGHSLILLVDASLKSIVAENhgwkFEAK 169
DSSP lhhHLLL11111111leeEEEEEEEEe1111LHHHHHHHHHHHHHHHLLL1leEEEEEL

DSSP Ee1111111111EEEEEEee11EEEEEEEEEEEL-LLL1111eeee1hhhh1111
Query EeiaapgxpvkpRRFTAKLsyrgRAFATVPIEVSSV-EAGNadqfdt1tsdalglvgvpa 172
ident
Sbjct Q-----TCGRIKI---eAEKTHIDVPMYAIpKDEF----- 196
DSSP L-----LEEEEE---hHHLEEEEEEEEEELLLL-----

DSSP leeeee1LHHH-----hhHHHHHH11111111LLLhhhhhhhhhhhh
Query avavpcxTIPW-----qiaQKLHAVTavleepkaNDRAhdldlqllegl 217
ident
Sbjct -----ELDSenvnlalregdrkwinSDPKIVEDW-----fNDSC----- 230
DSSP -----LLHhhlee1111111lee11HHHHHHH-----hHHHH-----

DSSP 11hhhhhhhhhhhhhhhh1111111111111111HHHHHHHHHHL-LLL-----
Query lldadlxptrsaciaifearaqhpwpprvatlphWPLIYAGALE-gLDHL----- 266

```



query vqilvdiurainn 272  
ident  
Sbjct elledffqyfgnfdfrknslnlrkgkevNKPESSplyiwnpfeqdlrnisknvnqpqlkf 431  
DSSP hhhhhhhhhhh11111leeee1111eeeELLLL111111111111111111111111hhhhhhh

DSSP -----  
Query ----- 292  
ident  
Sbjct vamaresawilqkedktqqminkepwglaavlip 466  
DSSP hhhhhhhhhhh111hhhhhh11111hhhh1111

No 613: Query=mol1A Sbjct=4r11E Z-score=3.9

[back to top](#)

DSSP -----LLLL---11LLLHHHHHHHHHHHHHLL--  
Query -----AAPY---ssPPTNLRSLRDRLTQVAERQG-- 26  
ident | |  
Sbjct dlvlkmc dhdesvvaravhraymlsrhrsFVEAlmaasKSSNVNRRNAIGALSHMSEqr 60  
DSSP 1hhhh1111hhhhhhhhhhhhhh11hhHHHHHHHHHLLHHHHHHHHHHHHHLL11

DSSP -----11hHHHHHHHHHH-----hhhhh1111111111eEE  
Query -----vfvGRLQRHVAXIV-----vaqfaat1tdtgap11LV 59  
ident |  
Sbjct ggpl1ifrsGGLAEIIRMLYDslesvvyavt1rn1lmhvsdsraqaralnavealtPH 120  
DSSP 1hhhhhhhh1LHHHHHHLLL11hhhhhhhhhhhhhhhhhhhhhhhhhhhhhh11hhhhhhhh11hhhhhhHH

DSSP EH-----HHHHHHHLL1111111111leeee11hhhhhhhhhhhh1111leeee1  
Query KG-----GSSLELRRGipdsrtskdfatvarrdieliheqladagetgwegftaift 111  
ident |  
Sbjct LHktnpk11aQVADGLYFL----- 139  
DSSP HH111hhhhHHHHHHHHH-----

DSSP 1lee1111111111leeeeeeeelleeeeeeeeeel1111111111leeee1hhhh1111  
Query apeeiaapgxpkprftaklsyrgrafatvpievssveagnadqfdt1tsdalglvgvp 171  
ident  
Sbjct -----liddap 145  
DSSP -----h111hh

DSSP 1leeeeLHHHHHHHHHHHHhh1111111111LLLHHHHHHHHHHHHL--LHHHHHHHHH  
Query aavavpcXTIPWQIAQKLHAVtavleepkanDRAHDLVDLQLEGLL--LDADLXPTRSA 229  
ident | | | | |  
Sbjct skitflsLLGPQILVSILREY-----sDHRKLIYTVVRCIRSLsvCPSNKPALISL 196  
DSSP hhhhhhhLHHHHHHHHHHHHL-----1LHHHHHHHHHHHHHH11LLLHHHHHHHHL

DSSP Hhhhhhh1111LLL--LLL11hhhhhhhh111111111LHHHHHHHHHHHHHHH  
Query CiaifearaqhpWPPR--VATLphwplyagalegldhlelarTVDAAAQAVQRFVARID 287  
ident | |  
Sbjct G-----c1PALYveLCTA-----KDERSQTAILVAMRNL 226  
DSSP L-----hhHHHHhhHHHL-----LLHHHHHHHHHHHHHH

DSSP HLLL-----  
Query RATKR----- 292  
ident  
Sbjct DSATNeenltqliikkleiirvandgmtacgtlsnltcntrnkqtvcshggidalvt 286  
DSSP HLLL1111hhhhhhhhhhhh11hhhhhhhhhhhh1111hhhhhhhh11hhhhhh

DSSP -----  
Query ----- 292  
ident  
Sbjct airrlpeveevtepalcalrhctarhslaeaaqselsrfcqafovildqletlrtpvikaa 346  
DSSP hhh1111hhhhhhhhhhhh111111hhhhhhhhhh111hhhhhhhh11hhhhhh

DSSP -----  
Query ----- 292  
ident







```

query  F I A F E L L a a p g x p v k p r n r I A R L S y i g i a r A I V F I E V S S V E A G H a u q I a U L I S u a i g i v g 107
ident
Sbjct  YEIRYAE-----hPYVHGvvk-----GVEVDVVPCYKlKE----- 118
DSSP  LEEEEEL-----1EEEEEEEL-----LEEEEEEEELLLL-----

DSSP  111leeeee11hhHHHHHHHHhhhh11111111LLLHhhhhhhhhhh11hhhhhhhhh 229
Query  vpaavavpctxtipWQIAQKLhavgtavleepkanDRAHdlvdqlleg111dadlpxtrsa
ident
Sbjct  ---pkniksavdrTPFHKKW-----1EGRI----- 140
DSSP  ---1111111111HHHHHHHH-----hHHHL-----

DSSP  hhhhhhhh1111111111111111hhHhHHHHHLLL-LLLL-----1
Query  ciaifearaqhpwprvatlphwplIYAGALEGL-DHLE-----1 268
ident
Sbjct  -----K GKENEVRLKGFkangiyaeykvrfgsgylce 175
DSSP  -----LLLHHHHHHHHHHHHhh1111111111111111hhhhh

DSSP  11LHHHH-----hHHHH-----hHHHH-----
Query  arTVDA-----aqAVQR-----fVARID----- 287
ident
Sbjct  11IVFYGsfletvknarrwtrrtviDVAKgevrkgeeffvvdpvDEKRNvaanlsldnla 235
DSSP  hhHHHHL1hhhhhhhh111111eeeELLLleee111leee111LLLL111111hhhhh

DSSP  -----
Query  ----- 287
ident
Sbjct  rfvhlcrefmeapslgffkpkhpleieperlrkiveergtavfavkfrkpdiddnlypq 295
DSSP  hhhhhhhhhhh111hhhh1111111111hhhhhhhhhh1leeeeeee1111hhhhhhh

DSSP  -----
Query  ----- 287
ident
Sbjct  lerasrkifflerenfmplrsafkaseefcyllfecqikeisrvfrmgpqfedernvk 355
DSSP  hhhhhhhhhhhhh111leeeeeee11leeeeeee1111leeeeeee111hhhhh

DSSP  -----
Query  ----- 287
ident
Sbjct  kflsrnrafrpfiengrwwafemrkfttpeegvrsyasthwhtlgknvgesireyfeis 415
DSSP  hhhh111111leee11leeeeeee111111hhhhhhhhhhhhhhhh11hhhhhhhhhh1leee

DSSP  -----h1111
Query  -----ratkr 292
ident
Sbjct  geklfkepvtaelcemmgvkd 436
DSSP  hhhh111111hhhhhhhh1111

```

No 617: Query=mol1A Sbjct=1n44A Z-score=3.8

[back to top](#)

```

DSSP  -----
Query  ----- 0
ident
Sbjct  alrgvtvdfsgfdgradaevlekamkglgtdedsilnlltarsnaqrqiaefkltfgr 60
DSSP  111111111111hhhhhhhhhh111111hhhhhhhh1111hhhhhhhhhhhhhh11

DSSP  -----LLL-----11111hhhhh
Query  -----AAPY-----ssptnlrslr 15
ident
Sbjct  dlvdnmxselgtgkfeklivaIMKPSrlydayelkhalkgagtdekvlteiasrtpeelr 120
DSSP  1hhhhhhhh111hhhhhhhhHLLHhhhhhhhhhh111111hhhhhhhhhh11hhhhh

DSSP  hhhHHHHHLLLHHHHHHHHhhhhhhhh11111111leeehhhhhhhh11111
Query  drlTQVAERQGVVFGRLQRHVaxivvaqfaatltddtgaplllvkgslelrrgipdsr 75
ident

```





DSSP HHHHHHHHHHHHHHHH11111LLLLL111HHHHHHHHH111111111LHHHHHHHHHH 282  
 Query LXPTRSACiaifearaqhwpPRVATlphwpliayagaleglhdhlarTVDAAAQAVQRF  
 ident |  
 Sbjct KPAIVEAG-----gmqaLGLHLT-----dPSQRLVQNCLWT 226  
 DSSP HHHHHHLL-----hHHhHLLL-----1LHHHHHHHHHH

DSSP HHHHHHLLL----- 292  
 Query VARIDRATKR-----  
 ident |  
 Sbjct LRNLSDAATKqegmegllgtlvqllgsddinvtcaagilsnltnnyknkmmvcvqvggi 286  
 DSSP HHHHLLL1111HHHHHHHHH1111HHHHHHHHHHH1111HHHHHHHHH11H

DSSP ----- 292  
 Query -----  
 ident -----  
 Sbjct ealvrtvIragdreditepaicalrhIltsrhqeamaqnavrlhyglpvvklIhppshw 346  
 DSSP hhhhhhhhhhh111HHHHHHHHHH11111HHHHHHHHH111HHHHHHH11111h

DSSP ----- 292  
 Query -----  
 ident -----  
 Sbjct plikatvglirnlalcpanhaplreqgaiprlvqllvrahqdtqregvrmeeivegctga 406  
 DSSP hhhhhhhhhhh111HHHHHHHHH11HHHHHHHHHHHHHHHH11111HHHHHHHHH

DSSP ----- 292  
 Query -----  
 ident -----  
 Sbjct lhilardvhnrvirgIntiplfvqllyspieniqrvaagvlcelaqdkeaaeiaega 466  
 DSSP hhh111HHHHHHHH111HHHHH11111HHHHHHHHHHH111HHHHHHHH11

DSSP -----  
 Query ----- 292  
 ident -----  
 Sbjct tapltellhsrnegvatyaaavIfrm 492  
 DSSP hhhhhhh1111HHHHHHHHHH1

No 620: Query=mol1A Sbjct=4evtA Z-score=3.8

[back to top](#)

DSSP -----LLL-----11111HHHHHHHHHHHH 23  
 Query -----AAPY-----ssPPTNLRLDRDLTQVAE  
 ident |  
 Sbjct ndedqvvnkaavmvhqlskkeasrhaimrspqMVAIvrtmqNTNDVETARCTAGTLHN 60  
 DSSP 11111111HHHHHHHHHH1111HHHHH111111111111LHHHHHHHHHLLHHHHHHHHHH

DSSP HLL-----11HHHHHHHHHH-----hHHHH111111 54  
 Query RQG-----vvfGRLQRHVAXIV-----vaqfaatItdtga  
 ident |  
 Sbjct LSHhregllaiFksgGIPALVKMLGSpvdsvlfyaittlhnlIhqegakmavrlagglq 120  
 DSSP HLLHHHHHHHHH11111HHHHHHHHH1111HHHHHHHHHHH1111HHHHHHH11hh

DSSP 11eEEEH-----HHHHHHHLL111111111eeeee111HHHHHHHHHHH1111e 106  
 Query p11LVKG-----GSSLELRGGIPdsrtskdfatvarrdieliheqladagetgwegf  
 ident |  
 Sbjct kmvALLNktnvkflaITTDCLQIL----- 144  
 DSSP hhhHHH111HHHHHHHHHHHH-----

DSSP eeee111ee1111111111eeeeeeeeee111111111eeeehh 166  
 Query taiftapeeiaagxpvkprfrftaklsyrgrafatvpievssveagnadqfdtltsdalg  
 ident -----  
 Sbjct -----a 145  
 DSSP -----h

DSSP h1111111eeeeeLLHHHHHHHHHHHH1111111111LHHHHHHHHHHL--LHHH



```

DSSP  HHHHHHLLLLLLLLLLLLLLLLLLLLLLLLLLLLLLLLLLLLLLLLLLLLLLLLLLLLLLLL 223
Query  glvgvpaavavpcXTIPWQIAQKLHAVtavleepkandRAHDLVDLQLEGLL--LDADL
ident  |               |               |
Sbjct  aygnqesklilaSGGPQALVNIMRTY-----tYEKLLWTTSRVLKVLsvCSSNK 195
DSSP  h111hhhhhhhhhhLLHHHHHHHHHHHHL-----1LHHHHHHHHHHHHHHH11LLLHH

DSSP  HHHHHHHhhhhhhhh111111LLLLL111hhhhhhhhhh111111111LHHHHHHHHHHHH 283
Query  XPTRSACiaifearaqhpwPRVATlphwpliyagalegldhlelarTVDAAAQAVQRFV
ident  |               |               |
Sbjct  PAIVEAG-----gmqalGLHLT-----dPSQRLVQNCLWTL 226
DSSP  HHHHHLL-----hHHHHHLLLL-----1LHHHHHHHHHHHHHH

DSSP  HHHHHLLLL----- 292
Query  ARIDRATKR-----
ident  |
Sbjct  RNLSDAATKqegmegllgtlvqllgsddinvvtcaagilsnltcnnyknmmvcvqggie 286
DSSP  HHHLLLLLL1111hhhhhhhhhh1111hhhhhhhhhhhhhhhh111hhhhhhhhhh11hh

DSSP  ----- 292
Query  -----
ident  |
Sbjct  alvrtvragdreditepaicalrhltsrhqaemaqnavrlhyglpvvkl1hppshwp 346
DSSP  hhhhhhhhh111hhhhhhhhhhhhhh11111hhhhhhhhhh111hhhhhh111111hh

DSSP  ----- 292
Query  -----
ident  |
Sbjct  likatvglirnlalcpahap1reqgaiprlvqllvrahqdtqregvrmeeeivegctgal 406
DSSP  hhhhhhhhhhh111hhhhhhhhhh11hhhhhhhhhhhhhhhh11111hhhhhhhhhhhh

DSSP  ----- 292
Query  -----
ident  |
Sbjct  hilardvhnrivirgIntiplfvqllyspieniqrvaagvlcelaqkeaaeiaeaegat 466
DSSP  hhh111hhhhhhhhhh111hhhhhhhh1111hhhhhhhhhhhhhh111hhhhhhhhhh11h

DSSP  ----- 292
Query  -----
ident  |
Sbjct  apltellsrnegvatyaaavlfrm 491
DSSP  hhhhh11111hhhhhhhhhhhh1

```

No 622: Query=mol1A Sbjct=4ev8A Z-score=3.8

[back to top](#)

```

DSSP  -----LLL-----11LLLHHHHHHHHHHHH 21
Query  -----AAPY-----ssPPTNLRSLRDLRTQV
ident  |
Sbjct  l1ndedqvvvkaavmvhqlskeasrhaimrspqMVSAivrvmqNTNDVETARCTAGTL 60
DSSP  111111111111hhhhhhhh11hhhhhhhh111LHHHHhhhhhhHLLHHHHHHHHHHHH

DSSP  HHHLL-----11hHHHHHHHHHHHH-----hhhhh11111 52
Query  AERQG-----vfgRLQRHVAXIV-----vaqfaat1tddt
ident  |
Sbjct  HNLSHhregllaifksgGIPALVKMLGSpvdsvlfyaittln111hqegakmavrlagg 120
DSSP  HHHLL1hhhhhhhhhh11HHHHHHHHHHL11hhhhhhhhhhhhhhhh111hhhhhhhh11h

DSSP  1111eEEEH-----HHHHHHHHH1111111111111111111111111111111111111111 104
Query  gap11LVKG-----GSSLELRGipdsrtskdfatvarrdieliheqladagetgwe
ident  |
Sbjct  lqkmvALLNktvklflaITTDCLQIL----- 146
DSSP  hhhhhHHHH111hhhhHHHHHHHHHH-----

DSSP  11111111111111111111111111111111111111111111111111111111111111 164
Query  gftaiftapeeiaapgxpvkprf1taklsyrgrafatvpievssveagnadqfdt1tsda

```

DSSP hhh11111leeeeeLHHHHHHHHHHHHh11111111LLHHHHHHHHHHHLL--LHHH  
 Query lglvgvpaavavpcXTIPWQIAQKLHAVtavleekandRAHDLVDLQLEGLL--LDAD 222  
 ident | | | | |  
 Sbjct -aygnqeskliilaSGGPQALVNIMRTY-----tYEKLLWTTSRVLKVLsvCSSN 195  
 DSSP -h111hhhhhhhhhhLLHHHHHHHHHHHLL-----1LHHHHHHHHHHHHH111LLH

DSSP HHHHHHHhhhhhhhh11111L LLLL111hhhhhhhh11111111LHHHHHHHHHHH  
 Query LXPTRSACiaifearaqhpwPRVATlphwplyagalegldhlelarTVDAAAQAVQRF 282  
 ident | | | | |  
 Sbjct KPAIVEAG-----gmqa1GLHLT-----dPSQRLVQNCLWT 226  
 DSSP HHHHHHLL-----h h h h h L L L L L-----1 L L H H H H H H H H H H H

DSSP HHHHHHLLLL-----  
 Query VARIDRATKR----- 292  
 ident |  
 Sbjct LRNLSDAATKqegmegllgtlvqllgsddinvvtcaagilsnltcnnyknkmmvcqvggi 286  
 DSSP HHHHHHLLLL1111hhhhhhhhhh11111hhhhhhhhhhhhhh111hhhhhhhhhh11hh

DSSP -----  
 Query ----- 292  
 ident |  
 Sbjct ealvrtvragdreditepaicalrhltsrhqeamaqnavrlhyglpvvkl1hppshw 346  
 DSSP hhhhhhhhh111hhhhhhhhhhhh11111hhhhhhhhhh111hhhhhh111111h

DSSP -----  
 Query ----- 292  
 ident |  
 Sbjct plikatvglirnalcpnanhplreqgaiprlvqllvrahqdtqregvrmeievegctga 406  
 DSSP hhhhhhhhhhh111hhhhhhhhhh111hhhhhhhhhhhhhhhh11111hhhhhhhhhh

DSSP -----  
 Query ----- 292  
 ident |  
 Sbjct lhilardvhnrivirgIntiplfvqllyspieniqrvaagvlcelaqkdaaeaeieaega 466  
 DSSP hhhh111hhhhhhhhhh111hhhhhhhh11111hhhhhhhhhhhh111hhhhhhhhhh111

DSSP -----  
 Query ----- 292  
 ident |  
 Sbjct tapltellhsrneqvatyaaavlfm 492  
 DSSP hhhhhhh11111hhhhhhhhhhhh1

No 623: Query=mol1A Sbjct=4evaC Z-score=3.8

[back to top](#)

DSSP -----L L L L-----11 L L L L H H H H H H H H H H H H L  
 Query -----A A P Y-----s s P P T N L R S L R D R L T Q V A E R Q 25  
 ident |  
 Sbjct edqvvnkaavmvhqlskkeasrhaimrspqMVSAivr tmqNTNDVETARCTAGTLHNLS 60  
 DSSP 1111111hhhhhhhhhhhh1111111hhHHHHHHHHHHHLLHHHHHHHHHHHHHLL

DSSP L-----11hHHHHHHHHHHH-----h h h h h h 1111111111  
 Query G-----v f G R L Q R H V A X I V-----v a q f a a t l t d d t g a p l 56  
 ident |  
 Sbjct HhregllaifksgGIPALVKMLGSpvdsvlfyaittln111hqeakmavrlagglqkm 120  
 DSSP L1hhhhhhhh11HHHHHHHHHLL11hhhhhhhhhhhhhhhh111hhhhhh11hhhh

DSSP eEEEH-----H H H H H H H H L 11111111leeeee111hhhhhhhhhhhh111leee  
 Query LLVKG-----G S S L E L R R G i p d s r t s k d f a t v a r r d i e l h e q l a d a g e t g w e g f t a 108  
 ident |  
 Sbjct vALLNktnvkflaITTDCLQIL----- 142  
 DSSP hHHHH111hhhhHHHHHHHHH-----



query HtapeeIaapgpvKPrriI takIsYrGIatavPievSSveagnauqIuItIsuaIgiV 100  
ident  
Sbjct -----ayg 145  
DSSP -----hll

DSSP 1111leeeeeLHHHHHHHHHHHHH1111111111LLHHHHHHHHHHHLL--LHHHHHHH  
Query gvpaavavpcXTIPWQIAQKLHAVtavleekandRAHDLVDLQLEGLL--LDADLXPT 226  
ident | | | | |  
Sbjct nqueskliilaSGGPQALVNIMRTY-----tYEKLLWTTSRVLKVLsvCSSNKPAI 195  
DSSP 1hhhhhhhhLHHHHHHHHHHHLL-----1LHHHHHHHHHHHH11LLHHHHHH

DSSP HHHHhhhhhhhh111111LLLLL111hhhhhhhhhh1111111111LHHHHHHHHHHHHHHH  
Query RSACiaifearaqhpwpPRVATlphwpliYagalegldhlelarTVDAAAQAVQRFVARI 286  
ident | | | | |  
Sbjct VEAG-----gmqa1GLHLLT-----dPSQRLVQNCLWTLRNL 226  
DSSP HLLL-----hhhhHLLL-----1LHHHHHHHHHHHHHHHH

DSSP HLLLLL-----  
Query DRATKR----- 292  
ident |  
Sbjct SDAATKqegmegllgtlvqllgsddinvvtcaagilsnltcnnyknkmmvcqvggiealv 286  
DSSP LLLLLL1111hhhhhhhhhh11111hhhhhhhhhhhhhhhh111hhhhhhhhhh11hhhhhh

DSSP -----  
Query ----- 292  
ident  
Sbjct rtvIragdreditepaicalrhltsrhqeamaqnavrlhyglpvvkl1hppshwplik 346  
DSSP hhhhh111hhhhhhhhhhhh11111hhhhhhhhhh111hhhhhh111111hhhh

DSSP -----  
Query ----- 292  
ident  
Sbjct atvglirnlalcpanhapIreqgaiprlvqllvrahqdtqregvrmeivegctgalhil 406  
DSSP hhhhhhhhh111hhhhhhhhhh111hhhhhhhhhhhhhhhh11111hhhhhhhhhhhhhh

DSSP -----  
Query ----- 292  
ident  
Sbjct ardvhnrivirgIntiplfvqllyspieniqrvaagvlcelaqdkeaaeiaeaegatapl 466  
DSSP 111hhhhhhhhhh111hhhhhhhhhh111hhhhhhhhhhhhhhhh111hhhhhhhhhh111hhhh

DSSP -----  
Query ----- 292  
ident  
Sbjct tellhsrnegvatyaaavlfrm 488  
DSSP hhhhh111hhhhhhhhhhhhhh1

No 624: Query=mol1A Sbjct=1g3jC Z-score=3.8

[back to top](#)

DSSP 1111111111hhhhhhHHHHHHHHH111hhHHHHHHHHHHHHHHHL-----  
Query aapyssptnlrsIrdRLTQVAERQgvvfrLQRHVXIVVaQFAAT----- 47  
ident | | | | |  
Sbjct -----hhreGLLAIFKSG----gIPALVKMLGS--PVDSvlfyaittlhnl 41  
DSSP -----1hhHHHHHHHHLL-----1HHHHHHLLLL--LHHHhhhhhhhhhhhh

DSSP -----111111111eEEH-----HHHHHHHLL111111111leeeel11hh  
Query -----1tddtgap11LVKG-----GSSLELRRGipdsrtskdfatvarrdie 89  
ident | | | | |  
Sbjct lhqegakmavrIagglqkmvALLNktnvkflaITTDCLQIL----- 82  
DSSP h1111hhhhhhhh11hhhhhhHHHH111hhhhHHHHHHHHHH-----

DSSP hhhhhhhhhhh111leeeel11le111111111leeeeeeeeelleeeeeeeeeel  
Query liheqladagetgwegftaiftapeeiaapgxpkprftaklsyrgrafatvpievssv 149  
ident

DSSP 11111111eEEEElhhhh111111eEEEELLHHHHHHHHHHHHHH1111111111LLHHHH  
Query eagnadqfdtlttsdalglvgvpaavavpcXTIPWQIAQKLHAVtavleepkandRAHDLV 209  
ident | | |  
Sbjct -----aygnqesklilaSGGPQALVNIMRTY-----tYEKLLW 116  
DSSP -----h111hhhhhhhhLLHHHHHHHHHHH-----1LHHHHH

DSSP HHHHHHHHL--LHHHHHHHHHHHHHHHH111111LLLL111hhhhhhhh111111  
Query DLQLEGLL--LDADLXPTRSACiaifearaqhpwprVAT1phwpliyagalegldhle 267  
ident | | |  
Sbjct TTSRVLKVLsvCSSNKPAIVEAG-----gmqalGLHLT----- 149  
DSSP HHHHHHHHH11LLLHHHHHHHLL-----hhhhhHLLL-----

DSSP 111LHHHHHHHHHHHHHHHHLL-----  
Query larTVDAAAQAVQRFVARIDRATKR----- 292  
ident | | |  
Sbjct --dPSQRLVQNCWTLRNLSDAATKqegmegllgtlvqllgsddinvvtcaagilsnltc 207  
DSSP --1LLHHHHHHHHHHHHHHHHLL1111hhhhhhhh1111hhhhhhhhhhhhhh11

DSSP -----  
Query ----- 292  
ident -----  
Sbjct nnyknmmvcvqvggiealvrtvragreditepaicalrhltsrhqeamaqnavrlhy 267  
DSSP 11hhhhhhhh11hhhhhhhhhh111hhhhhhhhhh11111hhhhhhhhhh11

DSSP -----  
Query ----- 292  
ident -----  
Sbjct glpvvvkl1hppshwplikatvglirn1alcpanhap1reqgaiprvqllvrahqdtqr 327  
DSSP 1hhhhhh111111hhhhhhhhhhhh111hhhhhhhh11hhhhhhhhhhhhhhhh

DSSP -----  
Query ----- 292  
ident -----  
Sbjct rtsmgqqfvegvrmeievegctgalhilarvhnrivirgIntiplfvqllyspieniqr 387  
DSSP hhh111111111hhhhhhhhhhhh111hhhhhhhh11hhhhhhhh11hhhh

DSSP -----  
Query ----- 292  
ident -----  
Sbjct vaagvlcelaqdkeaaeiaeagatapl1ellhsrnegvatyaaav1frmse 439  
DSSP hhhhhhh111hhhhhhhh111hhhhhh11111hhhhhhhhhhhhhh11

No 625: Query=mol1A Sbjct=4amqA Z-score=3.7

[back to top](#)

DSSP 111111111hhhhHHHHhhhh111HHHHHHHHH-HHHHHHH111111111eEE  
Query aapyspntn1rslrDRLTqvaerqgvvFGRLQRHVAX-IVVAQFAatltdtgap11LV 59  
ident | | |  
Sbjct -----RMLI-----FTYKLERYIKnKILPKIL-----vvpdrdKY 30  
DSSP -----LLL-----LHHHHHHHHHHLHHHHL-----111hhHE

DSSP EHHhhhhhh111111LLL-----LEEEEL-----1LHHHHHHHHHHHHLL11  
Query KGGssle1rrgipdsRTSK-----DFATVAR-----rDIELIHEQLADAGETGWeg 105  
ident | | |  
Sbjct QIK-----GSFRrripyitdiDIVNVHpeyddtNIYQRIVDLINSFTNDN-- 76  
DSSP EEE-----HHHH111111eeEEEEEL111111LHHHHHHHHHHHHLL-----

DSSP eEEEEELLEEL-----  
Query fTAIFTAPEEIA----- 117  
ident -----  
Sbjct -QIKLIYVICGTddrf11teysdeeiekikillnptelvelnnvkvfyineiwdlyk 135  
DSSP -LEEEEEEE1hh1111hhhhhh11111hhhh111111hhhhhhhhhhhh

uent  
Sbjct lrwtssevlagkklrggievsvfdvKNSILLQYFVKI-eYYPIGFDIAVRYK 191  
DSSP eeelhhhhhhleelhhhhleeehhhhhHLLLLEEEEEEEL-ILLEEEEEEEELLLL---

DSSP lllleeeelhhhhllllllleeeelhhhhhhhhhhhhlllllllLLLllhhhhhhhh  
Query adqfdtldsaldglvgpaavavpcxtipwqiaqklhavlavlepkANDrahdldvlql 213  
ident  
Sbjct -----FYQL----- 195  
DSSP -----LLL-----

DSSP hhhllhhhhhhhhhhhhhhlllllllLLL-LLLHHHHHHHHhlllllllLLL-  
Query legllldadlxptrsaciaifearaqhpwppRVAT-LPHWPLIYAGaleghleLART- 271  
ident  
Sbjct -----klanysKEYYfMLFPLRFYFK-----ndPTISk 223  
DSSP -----lhhhlllLLLllHHHHHHLL-----llHHHHh

DSSP -----  
Query ----- 271  
ident  
Sbjct qleyiietkfglykqllvridsyrtyesgnldldtaksiiisiikdirklngidmniid 283  
DSSP hhhhhhhllllhhhhhhhhhhhhhhllllhhhhhhhhhhhhhhllllllllhhhhh

DSSP -----hhhhhhhhhhhhhhlll  
Query -----vdaaqaqrfvaridratkr 292  
ident  
Sbjct kivevsnsagqdkiiawntlltqlytninksvknqskkyftryiniipkedrkclcl 341  
DSSP hhhhhhhllllhhhhhhhhhhhhhhhhhhhhhhhhhhhhhhhhhhhhllllhhhhllll

No 626: Query=mol1A Sbjct=3ovsB Z-score=3.7

[back to top](#)

DSSP lllllllllllhhhhhhhhhhhhllllHHHHHHHHHHHHHHHLLlllllllEEEE  
Query aapyspntnrslrdrltqvaerqGVVFGRLQRHVAXIVVAQFAATLTddtgapllLVK 60  
ident  
Sbjct -----mkveeilekalelviPDEEEVRKGREAEELRRRLDELG-----VEYV 43  
DSSP -----llllhhhhhhhhhhllHHHHHHHHHHHHHHHHHHLL-----LLEE

DSSP HHhhhhhhlllllll----lLEEEEL-----lHHHHHHHHHHHHhllleeeEE  
Query GGsslelrrgipDSRT----sKDFATVAR----rDIELIHEQLADAGetgwegftAI 109  
ident  
Sbjct FV-----gsyaRNTWlkgslIDVFLLFPeefskleLREGLIIGKAVL-----DS 89  
DSSP EE-----lhhHLLLllllleEEEEELllllhhHHHHHHHHHLL-----LE

DSSP ELLLEELlllllllEEEEEEeelleEEEEEEELLLLllllleeeelhhhhll  
Query FTAPEEIaapxpvkPRRFTAKLSyrgrafATVPIEVSSVEAGnadqfdtldsaldglvg 169  
ident  
Sbjct YEIRYAE-----HPYVHGvVK-----GVEVDVVPCKLKE----- 119  
DSSP EEELLLL-----LLEEEEL-----LEEEEEEELLLL-----

DSSP lllleeeelhhhhhhHHHHHHlllllllllLLLhhhhhhhhhhhhllhhhhhhhh  
Query vpaavavpcxtipwqiaQKLHAVtavlepkANDrahdldvlqllegllldadlxptrsa 229  
ident  
Sbjct -----pkniksavdrtpFHHKW-----EGRI----- 141  
DSSP -----llllllllllhhHHHHHH-----LLL-----

DSSP hhhhhhhllllllllllllhhHHHHLL-LLL-----lll  
Query ciaifearaqhpwpprvatlphwplIYAGALEG-LDHL-----ela 269  
ident  
Sbjct -----kGKENEVRLKGFkangiyyaeykvrgfsyglcel 177  
DSSP -----llllHHHHhHHHHhhllllllllllllllhhhhhh

DSSP LLHHHH-----hHHHH-----  
Query RTVDAA-----aAVQRF----- 282  
ident  
Sbjct LIVFYGsflvtknarrwrrtviDVAKGevrkgeeffvdpvdekrnvaanlsldnlar 237

DSSP -----  
 Query ----- 282  
 ident  
 Sbjct fvhlcrefmeapslgffkpkhpleieperlrkiveergtavfavkfrkpdiddnlypql 297  
 DSSP hhhhhhhhhhh111hhhh1111111111hhhhhhhhhhhh1leeeeeee11111hhhhhhhh

DSSP -----  
 Query ----- 282  
 ident  
 Sbjct erasrkifeblerenfmlrsafkaseefcyllfecqikeisrvfrmgpqedernvkk 357  
 DSSP hhhhhhhhhhhhh111leeeeeee11leeeeeee111111leeeeeee111hhhhhh

DSSP -----  
 Query ----- 282  
 ident  
 Sbjct flsrnrafrpfiengrwwafemrkfttpeegvrsyasthwhltgknvgesireyfeiisg 417  
 DSSP hh1111111leeeleeeeeee11111hhhhhhhhhhhh1hhhh11hhhhhhhhhh1leeeeh

DSSP -----hhhhhh1111  
 Query -----varidratkr 292  
 ident  
 Sbjct eklfkepvtaelcemmgvkd 437  
 DSSP hhhhh111hhhhhhhh1111

No 627: Query=mol1A Sbjct=4x4uF Z-score=3.7

[back to top](#)

DSSP 1111111111hhhhhhhhhhhhhh1LLLHHHHHHHHHHHHHHHHHHLL11111111EEEE  
 Query aapyspntnlrslrdrltqvaerqGVVFGRLQRHVAXIVVAQFAATLTddtgapLLVK 60  
 ident  
 Sbjct -----kveeilekalelviPDEEEVRKGREAEELRRRLDELG-----VEYV 42  
 DSSP -----1hhhhhhhhhh1111LLHHHHHHHHHHHHHHHHHHLL-----LLEE

DSSP HHHhhhhhh11111111LLEEEEL-----LLHHHHHHHHHHHHhh1111eeEEELLL  
 Query GGsslelrrgipdsrtsKDFATVAR-----RDIELIHEQLADAGetgwegftAIFTAPE 114  
 ident  
 Sbjct FV-gsyarntwlgksleIDVFLLPeefskeELRERGLEIGKAVL-----DSYEIRY 93  
 DSSP EE-hhhhh11111111leEEEEEE1111hhHHHHHHHHHHHHH-----EEEEEE

DSSP EL11111111LLEEEEEEEellleEEEEEEEEELLL1111leeeelhhhh1111le  
 Query EIaapgxpvkPRRFTAKLSyrgraFATVPIEVSSVEAGnadqfdltlsdalglvgpaav 174  
 ident  
 Sbjct AE-----HPYVHG VVK-----GVEVDVVP CYKLKE----- 118  
 DSSP LL-----LLEEEEEEL-----LEEEEEEEELLL-----

DSSP eee11hhhhhhHHHHHHhh1111111111LLHhhhhhhhhhhhh11hhhhhhhhhhhhhh  
 Query avpcxtipwqiaQKLHAVtavlepkandRAHdlvdlq1leg11ldadlxptrsaciaif 234  
 ident  
 Sbjct pkniksavdrtpFHHKWL-----EGRI----- 140  
 DSSP hhh1111hhhhHHHHHH-----LLL-----

DSSP hhh11111111111111hhhhHHHHHLL-LLLL-----1111LHHH  
 Query earaqhpwpprvatlphwplIYAGALEG-LDHL-----elarTVDA 274  
 ident  
 Sbjct -----kGKENEVRLKGFkangi ygaeykvr gfs gyl cellIVFY 181  
 DSSP -----1LLHHHHHHhhHHHHhh11111111111111111111hhhhhhhhHHHH

DSSP -----hhHHHH-----hhHHHH-----  
 Query -----aaQAVQR-----fvARID----- 287  
 ident  
 Sbjct gsfl etvknarrwrrtrvIDVAKgevrkgeeffvvdpvdeKRNvaanlsldnlarfvhlc 241  
 DSSP 11hhhhhhhh111111leEEELLLleee111leee1leEEEE111111hhhhhhhhhh

DSSP -----

```

Sbjct  rEImEapSgIgrKpNpPLeIEPErIIRKIVEErgtAVIavNIIKpdlvGdHlyppqIErAsI  301
DSSP   hhhhh111hhhh1111111111hhhhhhhhhhhh1leeeeeee11111hhhhhhhhhhhh

DSSP  -----
Query  ----- 287
ident  -----
Sbjct  kifeflerenfmpIrsafkaseefcyllfecqikeisrvfrrmgppfedernvkkflsrn  361
DSSP   hhhhhhh1111leeeeeee11leeeeeee111111leeeeeee111hhhhhhhhhh11

DSSP  -----
Query  ----- 287
ident  -----
Sbjct  rafrpfiengrwwafemrkfttpeegvrsyasthwhtlgknvgesireyfeiisgeklfk  421
DSSP   1111leee1leeeeeee11111hhhhhhhhhhhh1hhhh1hhhhhhhhhh1leeehhhh111

DSSP  -----h1111
Query  -----ratkr 292
ident  -----
Sbjct  epvtaelcemmgvkd 436
DSSP   111hhhhhhhh1111

```

No 628: Query=mol1A Sbjct=4x4uA Z-score=3.7

[back to top](#)

```

DSSP  1111111111hhhhhhhhhhhhhh1LLLHHHHHHHHHHHHHHHHHHLL111111EEEE
Query  aapyspntnlrslrdrltqvaerqGVVFGRLQRHVAXIVVAQFAATLTddtgap1LLVK  60
ident  |
Sbjct  -----mkveeilekalelviPDEEEVRKGREAEELRRRLDELG-----VEYV  43
DSSP  -----11hhhhhhhh11111LLHHHHHHHHHHHHHHHHHHHLL-----LLEE

```

```

DSSP  HHhhhhhh111LLL-----1LLEEEEL-----1LHHHHHHHHHHHHhh1111eeEE
Query  GGsslelrrgipDSRT-----sKDFATVAR-----rDIELIHEQLADAGetgwegftAI  109
ident  |
Sbjct  FV-----gsyaRNTWlkgslEIDVFLFPeefskeeLRERGLEIGKAVL-----DS  89
DSSP  EE-----1111LLL11111EEEEEEEL111111LHHHHHHHHHHHLL-----LL

```

```

DSSP  ELLLEE1111111111EEEEEEElleeEEEEEEEEEELLL1111leeeelh1hhhh11
Query  FTAPEEiaapgxpvkRRFTAKLSyrgraFATVPIEVSSVEAGnadqfdlttsdalglvg  169
ident  |
Sbjct  YEIRYH-----PYVHGvvK-----GVEVDVvPCYKKE-----  117
DSSP  LEEELL-----LEEEEEEEL-----LEEEEEEELLLL-----

```

```

DSSP  111leeeelh1hhHHHHHHhhhh1111111111LLHhhhhhhhhhh11hhhhhhhhhh
Query  vpaavavpcxtipWQIAQKLhavgavleepkanDRAHdlvdlqlleg11ldadlxptrsa  229
ident  |
Sbjct  ---pkniksavdrTPFHKKW-----1EGRI-----  139
DSSP  ---1111111111HHHHHHH-----hLLL-----

```

```

DSSP  hhhhhhh11111111111111hhHHHHHLLL-LLLL-----1
Query  ciaifearaqhpwpprvatlphwplIYAGALEGL-DHLE-----1  268
ident  |
Sbjct  -----KGKENEVRL1KGFLkangiyyaeykvrgfsgylce  174
DSSP  -----LLLHHHHHHHHHHhh1111111111111111hhhh

```

```

DSSP  11LHHHH-----hhHHHH-----hHHHH-----
Query  arTVDA-----aqAVQR-----fVARID-----  287
ident  |
Sbjct  11IVFYGsfletvknarrwtrrtviDVAKgevrkgeeffvvdvpvDEKRNvaanlsldnla  234
DSSP  hhHHHHL1hhhhhhhh11111leeeELLLleee111leee11EEEE11111hhhh

```

```

DSSP  -----
Query  ----- 287
ident  -----
Sbjct  rfvhlcrefmeapslgffkpkhpleieperlrkiveergtavfavkrkpdvddnlypq  294
DSSP  hhhhhhhhhhh11hhhh1111111111hhhhhhhhhh1leeeeeee11111hhhhhh

```

```
Query ----- 287
ident
Sbjct lerasrkiflerenfmpIrsafkaseefcyllfecqikeisrvfrrmgpqfedernvk 354
DSSP hhhhhhhhhhhhhhhhhlllleeeeeeeellleeeeeeeellllllleeeeeeeellhhhhh

DSSP -----
Query ----- 287
ident
Sbjct kfIsrnrafrpfiengrwwafemrkfttpeegvrasyasthwhtlgknvgesireyfeiis 414
DSSP hhhhllllllleeeleeeeeeeellllhhhhhhhhhhhhhhhhllhhhhhhhhhhllleeee

DSSP -----hllll
Query -----ratkr 292
ident
Sbjct geklfkepvtaelcemmgvkd 435
DSSP hhhhllllllhhhhhhhhhhllll
```

No 629: Query=mol1A Sbjct=1kdhA Z-score=3.7

[back to top](#)

```
DSSP ----- 0
Query -----
ident
Sbjct kkisqyacqrrttlennynqlftdaldilaendelrenegsclafmrassvIkslpfipits 60
DSSP lllllllhhhhllllllllllhhhhhhhhhhhhhhhhllllhhhhhhhhhhhhhhhhllllllllll

DSSP ----- 0
Query -----
ident
Sbjct mkdteqipclgdkvkssiiegiiedgesseakavlnderyksfklftsvfgvlgktaekwf 120
DSSP hhhhllllllllhhhhhhhhhhhhhhllllhhhhhhhhhhhhhhhhhhllllllllhhhhhhhh

DSSP ---llllllllllhhhhhhhhhhhhhhllllhHHHHHHHHHHHHHHHHHLL-LLLLLLLL
Query ---aapyspntlrslrdrltqvaerqgvvfGRLQRHVAXIVVAQFAAT-LTDDTGAPL 56
ident
Sbjct rmgftrtlskiqsdkslrftmqkagflyyedIVSCVNRPEAEAVSMLVKEaVVTFLPDAL 180
DSSP hllllllhhhhhhllllllllhhhhhhhhllhhhhHLLLHHHHHHHHHHHHHHHHHLLLE

DSSP EEEEEHHHHHHhhllllllllLEEEEEEEL-----lHHHHHHHHHHHHhhllllle
Query LLVKGSSLELrrgipdsrTSKDFATVAR-----rDIELIHEQLADAGetgwegf 106
ident
Sbjct VTMTGGFRRGK-----mTGHDVDFLITspeatedeeqLLHKVTDfWKQGG----- 226
DSSP EEEELHLLL-----lLLEEEEEEEe1111hhhhhhHHHHHHHHHHHLLL-----

DSSP eeEELLEELLLL-----LLEEEEEE-----LLEEEEEE
Query taIFTAPEEIAAPG-----XPVKPRRFTAKLSY-----RGRAFATVPfEVSSV 149
ident
Sbjct --LLLYCDILESTFekfkqpsrIDHFQKCFILKLDHgrvhseksEGKGWKAIRVDLVMC 284
DSSP --LEEEELLLLllllllllllllLEEEEEEHHhhllllllllLEEEEEE

DSSP -LLLLllllleeeellhhhhllllleeeellhHHHHhhhhhhhhllllllllllllHHH
Query -EAGNadqfdtltsdalglvgvpaavavpcxtiPWQIaqlhvtavlepkandraHDL 208
ident
Sbjct pYDRR-----aFALL-----gwtgSRQ 301
DSSP eLLH-----hHHHH-----hhlllHH

DSSP HHHH-----hhhhllhhhhhhHHHHhhhhhhllllllllllllllhh
Query VDLQ-----llegllldadlxptrSACIaifearaqhpWPPRvatlphwpl 254
ident
Sbjct FERDlrryatherkmmldnhalhydrtkrvfleAESEE-----eifAHLG----- 345
DSSP HHHHHhhhhhhhhleee111leee111leee1LLHH-----hhHHLL-----

DSSP hhhhhllllllllllllllhhhhhhhhHHHHhhhhhhllll
Query iyagalegldhlelartvdaaaqavQRFVardratkr 292
```









```

DSSP  HHHHHHHHH1111111LLEEEEL-----LLHHHHHHHHHHHHhh1111eeEEELLE
Query  GGsslelrrgipdsrtsKDFATVAR-----RDIELIHEQLADAGetgwegftAIFTAPE 114
ident  |
Sbjct  FV-gsyarntwlgksleIDVFLFPeefskeELRERGLEIGKAVL-----DSYEIRY 94
DSSP  EE-hhhhh1111111eEEEEEEEL1111hhHHHHHHHHHHLLL-----LEEEEEE

DSSP  EL11111111EEEEEEElleeEEEEEEEEELLLL1111leeeelhhhh1111le
Query  EIaapgxpvkpRRFTAKLSyrgraFATVPIEVSSVEAGnadqfdlttsdalglvgvpaav 174
ident  |
Sbjct  AE-----hPYVHGvvk----GVEVDVVPCYKLKE----- 119
DSSP  LL-----LEEEEEEEL-----LEEEEEEELLLL-----

DSSP  eeeel1hhhhhhHHHHHHh11111111LLLHhhhhhhhhhh11hhhhhhhhhhhhhh
Query  avpcxtipwqiaQKLHAVtavleepkanDRAHdlvdlqllegllldadlxptrsaciaif 234
ident  |
Sbjct  pkniksavdrtpFHHKWL-----EGRI----- 141
DSSP  111111111hhHHHHH-----HHHL-----

DSSP  hhh111111111111hhHHHHHLL-LLLL-----1111LHHH
Query  earaqhpwpprvatlphwplIYAGALEG-LDHL-----elarTVDA 274
ident  |
Sbjct  -----kGKENEVRLKGFkangiyaeykvrfgsgylcellIVFY 182
DSSP  -----1LLHHHHHHhHHHHhh111111111111hhhhhhHHHH

DSSP  H-----hhHHHH-----hhHHHH-----
Query  A-----aqAVQR-----fvARID----- 287
ident  |
Sbjct  GsfletvknarrwrrtviDVAKgevrkgeeffvdpvdEKRNvaanlsldnlarfvhlc 242
DSSP  Lhhhhhhhh1111111eeEELLLleee1111lee1111LLL111111hhhhhhhhhh

DSSP  -----
Query  ----- 287
ident  -----
Sbjct  refmeapslgffkpkhleieperlrkiveergtavfavkfrkpdvddnlypqlerasr 302
DSSP  hhhhh111hhhh11111111hhhhhhhhhh1leeeeeee1111hhhhhhhhhhhh

DSSP  -----
Query  ----- 287
ident  -----
Sbjct  kifeflrenfmlprlsafkaseefcyllfecqikeisrvfrmgpqedernvkkflsrn 362
DSSP  hhhhhhh1111leeeeeee1111leeeeeee1111111leeeeeee1111hhhhhhhhhh11

DSSP  -----
Query  ----- 287
ident  -----
Sbjct  rafrpfiengrwwafemrkfttpeegvrsyasthwhtlgknvgesireyfeiisgeklfk 422
DSSP  1111le111leeeeeee1111hhhhhhhhhh1hhhh1hhhhhhhhhhleeeehhhhh11

DSSP  -----h1111
Query  -----ratkr 292
ident  -----
Sbjct  epvtaelcemmgvkd 437
DSSP  111hhhhhhhh1111

```

No 635: Query=mol1A Sbjct=4x4sC Z-score=3.6

[back to top](#)

```

DSSP  111111111hhhhhhhhhhhhhh1LLLHHHHHHHHHHHHHHHHHHLLL1111111EEEE
Query  aapyssptnlrslrdrltqvaerqGVVFGRLQRHVAXIVVAQFAATLTddtgap1LLVK 60
ident  |
Sbjct  -----mkveeilekalelviPDEEEVRKGREAEELRRRLDELG-----VEYV 43
DSSP  -----111hhhhhhhhhh1LLLHHHHHHHHHHHHHHHHHHH-----LLEE

```

```

Query  GSSSICLIIIGIPDRI      SRIHIVAR      KYLEELHLEQLDHHVOCGWSGICHI  100
ident
Sbjct  FV-----gsyaRNTWlkgslleIDVFLLFPeefskeELRERGLEIGKAVL-----DS   89
DSSP  EE-----1111LLLL1111leEEEEEEEL1111hhHHHHHHHHHHHHHL-----LE

DSSP  ELLLEEL11111111LEEEEEEEElleeEEEEEEEEELLLL1111leeeelhhhhll
Query  FTAPEEIaapgxpvkPRRFTAKLSyrgraFATVPIEVSSVEAGnadqfdtltsdalglvg  169
ident
Sbjct  YEIRYAE-----HPYVHGIVVK----GVEVDVVPCKLKE-----119
DSSP  EELLLL-----LLEEEEL-----LEEEEEEEELLLL-----

DSSP  111leeeelhhhhhhHHHHHHh11111111LLLHhHHHHHHHHHHh11hhhhhhhhhh
Query  vpaavavpcxtipwqiaQKLHAVtavleepkanDRAHdlvd1qlleg11ldadlxptrsa  229
ident
Sbjct  -----pkniksavdrtpFHHKWL-----EGRI-----141
DSSP  -----11111111hhHHHHHH-----HHHH-----

DSSP  hhhhhhhh111111111111hhHHHHHLL-LLLL-----111
Query  ciaifearaqhpwprvatlphwplIYAGALEG-LDHL-----ela  269
ident
Sbjct  -----kGKENEVRL1KGFLkangiyyaeykvrfgsgylcel  177
DSSP  -----1LLHHHHHHhHHHHh111111111111hhhhhh

DSSP  1LHHHH-----hhHHHH-----hhHHHH-----
Query  rTVDA-----aqAVQR-----fvARID-----  287
ident
Sbjct  IIVFYGsfletvknarrwtrrtviDVAKgevrkgeeffvvdpvdeKRNvaanlsldnlar  237
DSSP  hHHHHL1hhhhhhhh11111leeeEHHHleeeel111leeeelleEEEE11111hhhhhh

DSSP  -----
Query  -----  287
ident
Sbjct  fvh1crefmeapslgffkpkhpleieperlrkiveergtavfavkfrkpdiddnlypq1  297
DSSP  hhhhhhhhh11hhhh11111111hhhhhhhhhh1leeeeee1111hhhhhhhh

DSSP  -----
Query  -----  287
ident
Sbjct  erasrkifflerenfmplrsafkaseefcyllfecqikeisrvfrrmgpqedernvkk  357
DSSP  hhhhhhhhhhh111leeeeee11leeeeee11111leeeeee111hhhhhh

DSSP  -----
Query  -----  287
ident
Sbjct  flsrnrafrpfiengrwwafemrkfttpeegvrsyasthwhltlgknvgesireyfeiiisg  417
DSSP  hhh11111leeeleeeeee1111hhhhhhhhhhhh1hh11hhhhhhhh1leeeel

DSSP  -----h1111
Query  -----ratkr  292
ident
Sbjct  ek1fkepvtaelcemmgvkd  437
DSSP  hhh1111hhhhhhhh1111

```

No 636: Query=mol1A Sbjct=4yj1C Z-score=3.6

[back to top](#)

```

DSSP  111111111hhhhhhhhhhhhhh1111hhhhhhhhhhhhhhhh11111111leeee
Query  aapyspntnlrslrdrltqvaerqgvfgrlqrhvaxivvaqfaatltddtgap11lvk  60
ident
Sbjct  -----  0
DSSP  -----

DSSP  hhhhhhhh11111111leeeel11hhhhhhhhhhhh111leeeel1lee1111
Query  ggsslelrrgipdsrtskdfatvarrdieliheqladagetgwegftaiftapeeiaapg  120
ident

```



```

Sbjct PAF-----kCTGIWPRSAA----- 168
DSSP EEE-----eELLLLLLHHH-----

DSSP hhhhhhhhhhhllhhhhhhhhhhhhhhhhhhllllllllllllL-----
Query hdlvdlqllegllldadlxptrsaciaifearaqhpwpprvATLP----- 250
ident |
Sbjct -----hwp1phipwpgpnrvAEVkaegfnllskecdaw 202
DSSP -----hllllllllllhhhhHHHHHlleeeellllllle

DSSP -----lHHHH-hHHHH-LLLL-----llllllL-----
Query -----hWPLI-yAGAL-EGLD-----hleLART----- 271
ident |
Sbjct lqfaeaenRLQMggCRKKcLSILktlrdrhlelpgqplnnyhmkTLVSyecekhpresdw 262
DSSP eelhhhhhHLLlLlHHHhHHHHhhhhhhllllllllllhhhhHHHHhhhhhhllllhh

DSSP -----hhhhhhhhhhhh
Query -----vdaaaqavqrfva 284
ident |
Sbjct descldgdrIngillqlisclqrcrrephyflpnldlfgkphsalenaakqtwrlareilt 322
DSSP lhhhhhhhhhhhhhhhhhhhhllllllllllllllllllllhhhhhhhhhhhhhhhhhh

DSSP hhhhllll
Query ridratkr 292
ident |
Sbjct npkslek1 330
DSSP lllhhhh1

```

No 638: Query=mol1A Sbjct=1mivA Z-score=3.5

[back to top](#)

```

DSSP lllllllllllhhhhhhhhhhhhhhllllhhHHHHHHHHHHHHHHHLLllllllLEEE-
Query aapyspntlrsldr1tqvaerqgvfgRLQRHVAXIVVAQFAATLTddtgapLLL- 59
ident |
Sbjct -----XKPPFQEALGIQQLKQHG-----YDAYf 24
DSSP -----LLHHHHHHHHHHHHHLL-----LLEEe

DSSP EHHHHhhhhLllllllllLEEEElLHHHHHHHHHHhhhhlllleeeEELLLEE1111
Query KGSsLe1rrGIPDSRTSKDFATVArrDIElIHEQLAdagetgwegftaIFTAPEEiaap 119
ident ||
Sbjct VGGAVR---dLLGRPIGDVDIATS-aLPEDVXAIFP-----KTIDVGS---- 64
DSSP ELHHHH---hHHHLLllllLEEEEL-lLHHHHHHHLL-----LEEEEL----

DSSP lllllLEEEEEEeelleeeEEEEEEELL---LLLLllleeeelhhhhlllllle
Query gxpVKPRRFTAKLSyrgrafATVP1EVSSVE---AGNAdqfdt1tsdalglvgpaava 175
ident |
Sbjct ---KHGTVVVHK-----GKAYEVTTFKTdgsvTFVR----- 93
DSSP ---LLEEEEEEEL-----LEEEEEELEElleEELL-----

DSSP eeelLHHHHhHHHH-----hhhHLLl111L
Query vpcxTIPWQiaQKL-----havTAVLeepKA 201
ident |
Sbjct ---sLEEDL-KRRDftxnaiaxdeygtiidpfggreairrriirtvgeaekRFRE---DA 146
DSSP ---lHHHHH-LLLLlhhhlleellllleellllhhhhhhlee111llhhHHHH---LL

DSSP LLl1hhhhhhhhhhhhllhhhhhhhhhhhhhhhhlllllllllllllHHHHHHHHHl
Query NDrahldvdlqllegllldadlxptrsaciaifearaqhpwpprvatlphWPLIYAGAl 261
ident |
Sbjct LR-----xxrAVRFVSEL-- 159
DSSP HH-----hhHHHHHHHH--

DSSP lllllllllllhhHHHHHH-----
Query gldhlelartvdAAAQAV----- 279
ident |
Sbjct -----gfALAPDTeqaiqvnapllahisverxtxexekllggpfaaralpllaet 209

```









DSSP 1leeeeeLHHHHHHHHHHHHHh1111111111LHHHHHHHHHHHHL--LHHH-HHHHHH  
 Query aavavpcxTIPWQIAQKLHAVtavleekandRAHDLVDLQLEGLL--LDAD-LXPTRS 228  
 ident | | |  
 Sbjct -----GSVKALMECALEV-----kKESTLKSVALWNLsaHCTEnKADICA 196  
 DSSP -----LHHHHHHHHHLL-----1LHHHHHHHHHHHHh1LHHhHHHHHH

DSSP hhHHHHhh1111LLL--LLLL1HHHHhhhh1111111111HHHHHHHHHHHHH  
 Query acIAIFearaqhpWPPR--VATLphWPLiyagalegldhlelartVDAQAQAVQRFVARI 286  
 ident |  
 Sbjct --VDGA-----1AFLVgtLYR--SQTN-----TLAIIESGGGILRNV 230  
 DSSP --LLH-----hHHHHhhHLL--LLL-----LLHHHHHHHHHHHHH

DSSP HLLLL-----  
 Query DRATKR----- 292  
 ident  
 Sbjct SSLIATnedhrqilrennc1qt1lqhlkshsltivsnacgtlwnlsarnpkdqealwdmg 290  
 DSSP HHHHLL1hhhhhhhh11hhhhhhhh1111hhhhhhhhhhhh1111hhhhhhhhhh11

DSSP -----  
 Query ----- 292  
 ident  
 Sbjct avsm1knlihskhkmiamsaaalrnlmanrpaky 325  
 DSSP hhhhh111111hhhhhhhhhhhh11111

No 643: Query=mol1A Sbjct=3nmzA Z-score=3.5

[back to top](#)

DSSP -----  
 Query ----- 0  
 ident  
 Sbjct dkddmsrtllamsssqdscismrqsqclp1liqllhgnkdksvlsrgskeararasaaalh 60  
 DSSP 11hhhhhhhhhh1111hhhhhhhh11hhhhhhhh111111111111hhhhhhhhhh

DSSP -----  
 Query ----- 0  
 ident  
 Sbjct niihsqpddkrgrreirvhlleqiraycetcwewqeahepgmdqdknpapvehqicpav 120  
 DSSP hhhhh1111hhhhhhhhhhhhhhhhhhhhhh111111111111111111hhhh

DSSP -----  
 Query ----- 0  
 ident  
 Sbjct cvlmklsfdeehrhanelgglqaiellqvdcemyglndhysitlrryagmalntlf 180  
 DSSP hhhhh111hhhhhhhh11hhhhhhhhhhhh111111hhhhhhhhhhhhhhhh

DSSP -----LLL--11LLLHHHHHHHHHHHHLL-----11hHHH  
 Query -----AAPY--ssPPTNLRSLRDRLTQVAERQG-----vvfGRL 32  
 ident  
 Sbjct gdvankatlcsmkCMRALvaq1KSESEDLQQVIASVLRNLSWradvnskktlrevgSVK 240  
 DSSP 11hhhhhhhh1hhHHHHhhhhHLLLHHHHHHHHHHHHLL111hhhhhhhh11HHH

DSSP HHHHHHH-----hhhhh1111111111eEEE-----  
 Query QRHVAXIV-----vaqfaat1tddtgap11LVKG----- 61  
 ident  
 Sbjct ALMECALEvkestlksvalwnlsahctenadicavdgalafLVGTLtyrsqntla 300  
 DSSP HHHHHLL111hhhhhhhhhhhhhhhhhhhh11hhhhhhHLL11111111h

DSSP ---HHHHHHHLL1111111111e111hhhhhhhhhhhh1111e111e111  
 Query ---GSSLELRGipdsrtskdfatvarrdieliheqladagetgwegftaiftapeeiaa 118  
 ident | |  
 Sbjct iieSGGGILRNV----- 312  
 DSSP hhhHHHHHHHH-----

```

ident -----ssliatnedhrQILR-----eN 329
Sbjct -----hhhh111hhhhHHHH-----hL
DSSP -----hhhh111hhhhHHHH-----hL

DSSP LLHhHHHHHHHHhh11111111LLHh-HHHHHHHHHHHL--LHHHHHHHHHHhhhhhh
Query XTIpWQIAQKLAvtavleepkanDRAH-DLVDLQLLEGLL--LDADLXPTRSACiaife 235
ident | | | | | | | | | | | | | | | |
Sbjct NCL-QTLQHLKS-----HSLTiVSNACGTLWNLSarNPKDQEALWDMG----- 372
DSSP LHH-HHHHHLLL-----LHHhHHHHHHHHHHH1LHHHHHHHHHH-----

DSSP hh1111LLL--LLLL11hhhhhhhh1111111111HHHHHHHHHHHHHHLLL-
Query araqhpWPPR--VATLphwpliYagalegldhleIarTVDAAAQAVQRFVARIDRATKR- 292
ident | | | | | | | | | | | | | | | | | |
Sbjct ---avSMLKn1IHSK-----HKMIAMGSAAALRNLMANRPak 406
DSSP ---hhHHH11LLL-----LHHHHHHHHHHHHHHLLL1

```

No 644: Query=mol1A Sbjct=4atbD Z-score=3.4

[back to top](#)

```

DSSP 111111111hhhhhhhhhhL111111111HHHHHHHHHHHHHHHHLL11LLLE-EE
Query aapyspntlrslrdrltqvaerQGVVFGRLQRHVXIVVAQFAATLTDdtGAPLL-LV 59
ident | | | | | | | | | | | | | | | | |
Sbjct ----ifvnddrvmakhssvpyptQEELAVQNMVSHTERALKAVSDWID--EQRTLrGV 53
DSSP ----11hhhhhhhhhh1111111111HHHHHHHHHHHHHHHHHHHH--L11LLeEE

```

```

DSSP EHHhhhhhh1111111111LEEEEL-LHHHHHHHHHHHHL-LLE--eEEE
Query KGGsslelrrgipDSRT----sKDFATVARR-DIELIHEQLADAGETG-WEGF--tAIF 110
ident | | | | | | | | | | | | | | | | |
Sbjct MRV-----glvaKGLLlkgdldLELVLLCKEPTTALLDKVADNLAIQITTVTedkYEI 107
DSSP EEL-----hhhHLLL11111eEEEEEEEL11LHHHHHHHHHHHHHHHHLL111LEE

```

```

DSSP LLEEL111111111EEEEEEeelleEEEEEEEEELLL11111eeee1hhhh111
Query TAPEEiaapgxpvkpRRFTAK1syrgraFATVPIEVSSVEAGnadqfdt1tsdalglvgv 170
ident | | | | | | | | | | | | | | | | |
Sbjct LQSVDD-----AAIVIK--ntkepPLSLTIHLTPVVR-----eemekva 145
DSSP EEELL-----LEEEEE--11111LEEEEEELHHH-----hHHHh11

```

```

DSSP 111111111hhhhhhHHHHhh1111111111L111111111Lhhhhhhhhhh11hhhhhhhhhh
Query paavavpcxtipqiaQKLHAVtavleepkaNDRAhd1vdlq1leg11dadlxptrsac 230
ident | | | | | | | | | | | | | | | | |
Sbjct gpdvldrqqklaalLRHAKW-----fQARA----- 172
DSSP 111111hhhhhhhhHHHH-----hHHH-----

```

```

DSSP hhhhhhh111111111111LHHhHHHHHL-1LLL-----1111LHHHH
Query iaifearaqhpwprvatlpHWPLiYAGALE-gLDHL-----elarTVDAAA 276
ident | | | | | | | | | | | | | | | | |
Sbjct -----nGLKS-CVIVIRv1RDLCtrvptwglrgwple11CEKsig 212
DSSP -----1LLL-HHHHHHHhHHHHhhhhhh11hhhhHHHHHH

```

```

DSSP H-----hHHHHhHHHL-----
Query Q-----avQRFvarIDRA----- 289
ident | | | | | | | | | | | | | | | | |
Sbjct TanrpmgagelrrvleclagivmpdsgIYDP-ceKEAtdaighldrqqreditqsaq 271
DSSP L111111hhhhhhhhhh1111111111LLL-1LLL111111111hhhhhhhhhh

```

```

DSSP -----111
Query -----tkr 292
ident
Sbjct halr1aafq1hkvlgmdplpsdytvqipsttya 306
DSSP hhhhhhh11hhhh11111111111111111111

```

No 645: Query=mol1A Sbjct=4x4uE Z-score=3.4



```

DSSP  HHHhhhhhh111LLLL----1LLEEEEL----LLHHHHHHHHHHHHhh111leeEE
Query  GGslelrrgipDSRT----sKDFATVAR----RDIELIHEQLADAGetgwegftAI 109
ident  |
Sbjct  FV-----gsyaRNTWlkgslEIDVFLFPeefskeELRERGLEIGKAVL-----DS 89
DSSP  EE-----hHHHLLL111111EEEEEEEL1111hhHHHHHHHHHHHL-----EE

DSSP  ELLLEEL11111111EEEEEEELleeEEEEEEEEELLLL1111leeeelhhhhll
Query  FTAPEElaapxpvkpRRFTAKLSyrgraFATVPIEVSSVEAGnadqfdtlttsdalglvg 169
ident  |
Sbjct  YEIRYAE-----hPYVHGvVK----GVEVDVVPCKLKE-----119
DSSP  EEEEEEL-----1EEEEEEEL----LEEEEEEEELLLL-----

DSSP  111leeeel1hhhhhhHHHHHHh11111111LLHhhhhhhhhhh11hhhhhhhhhh
Query  vpaavavpctipwqiaQKLHAVtavleepkanDRAHdlvdlqllegllldadlpxtrsa 229
ident  |
Sbjct  ----pkniksavdrtpFHHKWL-----EGRI-----141
DSSP  ----hHH111hhhhhhHHHHHH-----HHHL-----

DSSP  hhhhhhh111111111111hhHHHHHLLL-LLLL-----1
Query  ciaifearaqhpwpprvatlphwplIYAGALEGL-DHLE-----1 268
ident  |
Sbjct  -----KKGKENEVRLKGFkangiyyaeykvrfgsgylce 176
DSSP  -----LLLHHHHHHHHHHHHh111111111111hhhhh

DSSP  11LHHHH-----hhHHHH-----hhHHHH-----
Query  arTVDA-----aqAVQR-----fvARID----- 287
ident  |
Sbjct  11IVFYGsfletvknarrwrrtviDVAKgevrkgeeffvvdvpdEKRNvaanlsldnla 236
DSSP  hhHHHHL1hhhhhhhh111111leeeELLLleee111leee1leEEEE11111hhhhh

DSSP  -----
Query  ----- 287
ident  -----
Sbjct  rfvhlcrefmeapslgffkpkhpleieperlrkiveergtavfavkrkpdvddnlypq 296
DSSP  hhhhhhhhhhh111hhhh1111111hhhhhhhhhh1leeeeeeel111hhhhhhh

DSSP  -----
Query  ----- 287
ident  -----
Sbjct  lerasrkifflerenfmlrsafkaseefcyllfecqikeisrvfrmgppqfedernvk 356
DSSP  hhhhhhhhhhh111leeeeeeel1leeeeeeel1111leeeeeeel11hhhhh

DSSP  -----
Query  ----- 287
ident  -----
Sbjct  kflsrnrafrpfiengrwwafemrkfttpeegvrsyasthwhltgknvgesireyfeis 416
DSSP  hhh111111leee1leeeeeeel111hhhhhhhhhh1hhhh11hhhhhhhh1leeee

DSSP  -----h1111
Query  -----ratkr 292
ident  -----
Sbjct  geklfkepvtaelcemmgvkd 437
DSSP  hhh11111hhhhhhhh1111

```

No 647: Query=mol1A Sbjct=4x4nA Z-score=3.4

[back to top](#)

```

DSSP  111111111hhhhhhhhhhhh1LLLHHHHHHHHHHHHHHHHHHLLL111111EEEE
Query  aapyssptnlrslrdrltqvaerqGVVFGRLQRHVAXIVVAQFAATLTddtgap1LLVK 60
ident  |
Sbjct  -----kveeilekalelviPDEEEVRKGREAEELRRRLDELG-----VEYV 42
DSSP  -----1hhhhhhhh111111LLHHHHHHHHHHHHHHHHHHHL-----LLEE

```

```

query  QSSSIEIIIGIPUSI CSNDIATYAK      IDLLHHSQENRDSVEGWEIGCAIITALE 117
ident
Sbjct  FV-gsyarntwlkgsleIDVFLLFPeefskeeLRERGLEIGKAVL-----DSYEIRY 93
DSSP  EE-hhhh111111111111EEEEEEEL111111hHHHHHHHHHHLLL-----LEELLEE

DSSP  EL111111111111EEEEEEElleeEEEEEEEEEELLL111111eeeee1hhhh111111e 174
Query  EIAapgxpvpkRRFTAKLSyrgraFATVPIEVSSVEAGnadqfdltlsdalglvgvpaav
ident
Sbjct  AE-----hPYVHG VVK----GVEVDVVPCYKKE----- 118
DSSP  LL-----1EEEEEEEL-----LEEEEEEEELLLL-----

DSSP  eeee1hhhhhhHHHHHHh1111111111LLHhHHHHHHHHhh1hhhhhhhhhhhhhhhh 234
Query  avpcxtipwqiaQKLHAVtavleepkanDRAHdlvdlqllegllldadlxptrsaciaif
ident
Sbjct  pkniksavdrtpFHHKWL-----EGRI----- 140
DSSP  111111hhhhhhHHHHHH-----HHHL-----

DSSP  hhh111111111111111hhHHHHHLL-LLLL-----1111LHHH 274
Query  earaqhpwpprvatlphwplIYAGALEG-LDHL-----elarTVDA
ident
Sbjct  -----kGKENEVRLKGFkangi ygae ykvr gfs gyl cell I VFY 181
DSSP  -----1LHHHHHHHHHHHH11111111111111111111hhhhhhHHHH

DSSP  H-----hhHHHH-----hhHHHH----- 287
Query  A-----aqAVQR-----fvARID-----
ident
Sbjct  GsfletvknarrwrrtrtviDVAKgevrkgeeffvvdpvdeKRNvaanlsldnlarfvhlc 241
DSSP  Lhhhhhhhh111111eeEELLLeeeel1111eeel1111LL111111hhhhhhhhhh

DSSP  ----- 287
Query  -----
ident
Sbjct  refmeapslgffkpkhleieperlrkiveergtavfavkfrkpdivddnlypqlerasr 301
DSSP  hhhhh111hhhh1111111111hhhhhhhhhh1leeeeeee11111hhhhhhhhhh

DSSP  ----- 287
Query  -----
ident
Sbjct  kifeflerenfmplrsafkaseefcyllfecqikeisrvfrrmgp qfedernvkkflsrn 361
DSSP  hhhhhhh1111leeeeeee11leeeeeee111111leeeeeee11hhhhhhhh1111

DSSP  ----- 287
Query  -----
ident
Sbjct  rafrpfiengrwwafemrkfttpeegvrsyasthwhtlgkvn gesirey fei is gek lfk 421
DSSP  1111leeeleeeeeee11111hhhhhhhhhh1hhhh1hhhhhhhhhh1leeeehhh11

DSSP  -----h1111
Query  -----ratkr 292
ident
Sbjct  epvtaelcemmgvkd 436
DSSP  111hhhhhh11111

```

No 648: Query=mol1A Sbjct=4x4oC Z-score=3.4

[back to top](#)

```

DSSP  1111111111hhhhhhhhhhhh1LLLHHHHHHHHHHHHHHHHHLL111111EEEE 60
Query  aapyspntnlrslrdrltqvaerqGVVFGRLQRHVAXIVVAQFAATLTddtgap1LLVK
ident
Sbjct  -----kveeilekalelviPDEEEVRKGREAEELRRRLDELG-----VEYV 42
DSSP  -----1hhhhhhhhhh1LLHHHHHHHHHHHHHHHHHHH-----LLEE

DSSP  HHhhhhhh11111111LLEEEEL-----LLHHHHHHHHHHHH1111eeEELLLE 114
Query  GGsslelrrgipdsrtsKDFATVAR-----RDIELIHEQLADAGetgwegftAIFTAPE
ident

```

DSSP EL111111111EEEEEEElleeEEEEEEEEEELLL11111leeeelhhhh11111e  
 Query E1aapgxpvkpRRFTAKLSyrgraFATVPIEVSSVEAGnadqfdlttsdalglvgvpaav 174  
 ident |  
 Sbjct AE-----hPYVHGvvk-----GVEVDVVPCYKlKE----- 118  
 DSSP LL-----1EEEEEEEL-----LEESEEELLLL-----

DSSP eeeelhhhhhhHHHHHHh111111111LLHhhhhhhhhhh11111hhhhhhhhhhhh  
 Query avpcxtipwqiaQKLHAVtavleepkanDRAHdlvd1qlleg11ldadlxptrsaciaif 234  
 ident |  
 Sbjct pkniksavdrtpFHHKWL-----EGRI----- 140  
 DSSP 1111111hhhhHHHHHH-----HHHL-----

DSSP hhh111111111111111hhHHHHHLL-LLL-----1111LHHH  
 Query earaqhpwpprvat1phwplIYAGALEG-LDHL-----elarTVDA 274  
 ident |  
 Sbjct -----kGKENEVRLKGFkangi ygaeykvrfgsylvcellIVFY 181  
 DSSP -----1LLHHHHHHHHHHhh111111111111hhhhhhHHHH

DSSP H-----hhHHH-----hhHHH-----  
 Query A-----aqAVQR-----fvARID----- 287  
 ident |  
 Sbjct GsfletvknarrwrrtrviDVAkgevrkgeeffvdpvdEKRNvaanlsldnlarfvhlc 241  
 DSSP Lhhhhhh1111111leeeELLLleee111leee111111111111111hhhhhhhhhh

DSSP -----  
 Query ----- 287  
 ident |  
 Sbjct refmeapslgffkpkhpleieperlrkiveergtavfavkfrkpdvddnlypqlerasr 301  
 DSSP hhhhh111hhhh111leee11111hhhhhhhhhh1leeeeee11111hhhhhhhhhhhh

DSSP -----  
 Query ----- 287  
 ident |  
 Sbjct kifeflerenfmplrsafkaseefcyllfecqikeisrvfrrmgpqedernvkkflsrn 361  
 DSSP hhhhhhh111leeeeee11leeeeee1111111leeeeee111hhhhhhhhhh11

DSSP -----  
 Query ----- 287  
 ident |  
 Sbjct rafrpfiengrwwafemrkfttpeegvrsvyasthwhtlgknvgesireyfeiisgeklfk 421  
 DSSP 111leee11leeeeee11111hhhhhhhhhh1hhhh11hhhhhhhhhh1leee1hhhh

DSSP -----h1111  
 Query -----ratkr 292  
 ident |  
 Sbjct epvtaelcemmgvkdsnssov 442  
 DSSP 111hhhhhhhh11111e111

No 649: Query=mol1A Sbjct=4x4pA Z-score=3.4

[back to top](#)

DSSP 111111111hhhhhhhhhhhh1LLLHHHHHHHHHHHHHHHHHHLLL111111EEEE  
 Query aapyspntnlrslrdrltqvaerqGVVFGRLQRHVXIVVAQFAATLTDdtgap1LLVK 60  
 ident |  
 Sbjct -----mkveeilekalelviPDEEEVRKGREAAEEELRRRLDELG-----VEYV 43  
 DSSP -----1hhhhhhhhhhhh1LLLHHHHHHHHHHHHHHHHHHHLL-----LEE

DSSP Hhhhhhhhh1111111LLEEEEL-----LLHHHHHHHHHHHHhh1111eeEELLLE  
 Query GGsslelrrgipdsrtsKDFATVAR-----RDIELIHEQLADAGetgwegftAIFTAPE 114  
 ident | | |  
 Sbjct FV-gsyarntwlkgsleIDVFLLPeefskeELRERGLEIGKAVL-----DSYEIRY 94  
 DSSP EE-hhh111111111EEEEEEEL1111hhHHHHHHHHHHHLL-----LEEEL

```

      1
Sbjct AE-----hPYVHGVVK----GVEVDVVPCYKKE----- 119
DSSP LL-----LLEEEEEEL-----LEEEEEEEEEELLL-----

```

```

DSSP eeeellhhhhhhHHHHHHh11111111LLHhhhhhhhhhh11hhhhhhhhhhhhhhhhhhhh
Query avpextipwqiaQKLHAVtavleepkanDRAHdlvdqllegllldadlxptrsaciaif 234
ident
Sbjct pkniksavdrtpFHHKWL-----EGRI----- 141
DSSP 11111111hhHHHHHH-----HHHL-----

```

```

DSSP hhh111111111111hhHHHHHLLL-LLLL-----111LHH
Query earaqhpwpprvatlpwplIYAGALEGL-DHLE-----1arTVD 273
ident
Sbjct -----KKGKENEVRLIKGFLkangiyaeykvrgfsgylce11IVF 181
DSSP -----LLLHHHHHHHHHHhh111111111111hhhhhhhhHH

```

```

DSSP HH-----hhHHHH-----hhHHHH-----
Query AA-----aqAVQR-----fvARID----- 287
ident
Sbjct YGsfletvknarrwtrrtviDVAKgevrkgeeffvvdpvdeKRNvaanlsldnlarfvl 241
DSSP HL1hhhhhhhh1111leeeELLLleee111leee111LLL11111hhhhhhhhhh

```

```

DSSP -----
Query ----- 287
ident
Sbjct crefmeapslgffkpkhpleieperlRkiveergtavfavkfrkpdvddnlpyqleras 301
DSSP hhhhh111hhhh11111111hhhhhhhhhhhh1leeeeeee1111hhhhhhhhhhhh

```

```

DSSP -----
Query ----- 287
ident
Sbjct rkifeflerenfmlrfsafkaseefcyllfecqikeisrvfrmgpgfedernvkkflsr 361
DSSP hhhhhhhhh111leeeeeee11leeeeeee11111leeeeeee111hhhhhhhh11

```

```

DSSP -----
Query ----- 287
ident
Sbjct nrafrpfiengrwwafemrkfttpeegvrsyasthwhtlkgknvgesireyfeiisgeklf 421
DSSP 11111leeeleeeeeee11111hhhhhhhhhhhhhhhhhh11hhhhhhhh1leeeelhhh

```

```

DSSP -----h1111
Query -----ratkr 292
ident
Sbjct kepvtaelcemmgvkd 437
DSSP 1111hhhhhhhh1111

```

No 650: Query=mol1A Sbjct=4evfA Z-score=3.3

[back to top](#)

```

DSSP -----
Query ----- 0
ident
Sbjct pkvtdianelkqaidakdevqiafiaseysaesrekiakayvasygekelpddikkalkgg 60
DSSP 11111111111111111111111111111111111111111111111111111111

```

```

DSSP -----1111111111hhhhhhhhhhhhhhhhhhLLLLLHH
Query -----aapysspptnlrslrdrltqvaerQGVVFG 30
ident
Sbjct seesllmdlfsdrhevraqhirdalsgrndhaffdvtvictpedwhetvaaytRMFKKP 120
DSSP hhhhhhhhh111hhhhhhhhhhhhhhhh1111hhhhhhhh1111hhhhhhhhhhHHHLLL

```

```

DSSP HHHHHHH-----hhHHHHhhLLLLLLL11leeehhhhhhhh1111111
Query RLQRHVA-----xiVVAQfaATLDDTGap11lvkggsslelrrgipdsrts 77
ident
Sbjct LVEDFMKdvrkedwc1lmekwMAHE--RVS RPGSP-----edeaq 159

```

DSSP 1leeeee111HHHHHH-----hHHHHhh111leeee1LEEL111111LLE  
 Query kdfatvarrdIELIHE-----qladagetgwegftaiftaPEEiaapgxpvKPR 126  
 ident |  
 Sbjct rldqafdqknTAYLIDffgtvpsaerypiaefkaqngksieqiaTIYT-----KTD 212  
 DSSP hHHHHhh111HHHHHHhhhh11hhHHHHhhHHHHhh1111hhHHhhHLL-----HHH

DSSP Eeeeeee1leeeeeEEEEE111111leeee1hHHh1111leeeeELLHHHHHH  
 Query RftaklsyrgrafatvpiEVSSveagnadqfdt1tsdalglvgvpaavavpCXTIPWQIA 186  
 ident |  
 Sbjct Y-----YTFY-----cahfaLLGMHRLAA 231  
 DSSP H-----HHHH-----hHHhHLLHHHHHH

DSSP HHHHHHLL111111LLHHHHHHHH-HHHHL1hhhhHHHHHHHHhhhh111LLL-  
 Query QKLHAVTAVleekandRAHDLVDLQL-LEGLL1dad1xPTRSACIAifearaqhPWP- 244  
 ident |  
 Sbjct YLINCACND-----kgDEKRRRITGmMVDKC-----1GAKHAYKI-----YDMg 272  
 DSSP HHHHHHHL-----1LHHHHHHHHhHHHL-----1LHHHHHH-----LLLh

DSSP -LLL111hhHHHHhh11111111HHHHHHHHHHHHhh111  
 Query -RVAT1phwpliyagalegldhlelartVDAAQAQVRFVARidratkr 292  
 ident |  
 Sbjct tDIER-----cfdKRMAPILRTLWRV-----k 294  
 DSSP hHHHH-----h1LLLHHHHHHHHLL-----1

No 651: Query=mol1A Sbjct=4txaA Z-score=3.3

[back to top](#)

DSSP 11111111hhHHHHhhHHHHhh1111hhHHHHhhHHHHhh11111111leeee  
 Query aapyspntnlrslrdrltqvaerqgvfgrlqrhvaxivvaqfaat1tdtgap1llvk 60  
 ident |  
 Sbjct ----- 0  
 DSSP -----

DSSP hHHHHhh11111111leeee11hhHHHHhhHHHHhh111leeee1lee1LLL  
 Query ggsslelrgipdsrtskdfatvarrdieliheqladagetgwegftaiftapeeiaAPG 120  
 ident |  
 Sbjct -----pqwtDFL 7  
 DSSP -----1111LLL

DSSP LLL-----1EEEEEEEEleeeeeee  
 Query XPV-----kpRRFTaklsyrgrafatvpiev 146  
 ident |  
 Sbjct SCPictqtfdetirkpislgeghtvckmc1nklhrkacpFDQTT---intdiellpvnsa 64  
 DSSP LLL11111111leee111leeehHHHHhh111111LLL---111111111hh

DSSP ee1111111leeee1hHHh1111leeee1hHHHHHHHHHHHL-111111LLL  
 Query ssveagnadqfdt1tsdalglvgvpaavavpcxtiPWQIAQKLHAVTA-vleekandRA 205  
 ident | | | |  
 Sbjct 1lqlvglcsgvedtkhyeakkcveelalykpv1SRPMQRKLVTLVHcqlveeegRIRA 124  
 DSSP hh1111111hhHHHHhhHHHHhhHHHHhh1111LHHHHHHHHHHHL11111hhHHHH

DSSP -HHHHHHHHHHHL-LHHH-----  
 Query -HDLVDLQLEGLL-LDAD----- 222  
 ident |  
 Sbjct mRAARSLGERTVTE1LQHQnpqqlssnlwaavrargcqlgparqeealkvl1aledg 184  
 DSSP hHHHHHHHHHHHHHLL111111hhHHHHhh111111hhHHHHhhHHHHhh11

DSSP -----  
 Query ----- 222  
 ident |  
 Sbjct salsrkvlvlfvvrleprfpqasktsighvvq1lyrascfkvtkrdsslmqlkeefrty 244  
 DSSP 1111hhHHHHhh1111111hhHHHHhhHHHHhh11leeee1leeee1hHHh

DSSP -----hHHHHHHhh1111111111hhHHHHhh1LLL-----





```

Query -----AAPY---ssPPTNLR 12
ident
Sbjct lslpdlvklmcdhdesvvaravhraymlsredpnffnapgfdhrsFVEAlmaasKSSNVN 60
DSSP 11hhhhhhhhhh1111hhhhhhhhhhhhhhhhhh1111111111hhHHHHHHhhhh1LLLHHH

DSSP HHHHHHHHHHHHLL-----11HHHHHHHHHHH-----hhh
Query SLRDRLTQVAERQG-----vfvGRLQRHVAXIV-----vaq 43
ident
Sbjct VRRNAIGALSHMSEqrggp1lifrsGGLAEIIRMLYDslsvvhyavttlrnlmhvsds 120
DSSP HHHHHHHHHHHHLL111hhhhhhhh11HHHHHHHHHLL11hhhhhhhhhhhhhhhhhh

DSSP hhh11111111eEEH-----HHHHHHHHL11111111eEEEEllhhhhhhh
Query faatltdtgaplLVKG-----GSSLELRRGipdsrtskdfatvarrdieliheql 95
ident
Sbjct raqaralnavealtPHLHktnpkllaQVADGLYFL----- 155
DSSP hhhhhhh11hhhhhhHHHH111hhhhHHHHHHHH-----

DSSP hhhhhhh1111eEEEE111e11111111eEEEEEEe1111111
Query adagetgwegftaiftapeeiaapgxvpprrftaklsyrgrafatvpievsveagnad 155
ident
Sbjct ----- 155
DSSP -----

DSSP 11eEEEE1hhhh11111eEEEELHHHHHHHHHHHHH11111111LLLHHHHHHHHHH
Query qfdtltsdalglvgvpaavavpcXTIPWQIAQKLHAVTavlepkandRAHDLVDLQLE 215
ident
Sbjct -----liddapskiflsLLGPQILVSIILREYS-----DHRKLIYTVVRCI 196
DSSP -----h111hhhhhhhhhhLHHHHHHHHHHHLL-----LHHHHHHHHHH

DSSP HHL--LHHHHHHHHHHhhhhhhhh11111LLL111hhhhhhhhhh11111111LHH
Query GLL--LDADLXPTRSACiaifearaqhwpPRVATlphwpliyagalegldhlelarTVD 273
ident
Sbjct RSLsvCPSNKPALISLG-----c1palyVELCT-----aKDE 228
DSSP HHH11LLLHHHHHHHLL-----hhhhhhHLL-----1LLH

DSSP HHHHHHHHHHHHHHHHHL-----
Query AAAQAVQRFVARIDRATKR----- 292
ident
Sbjct RSQTAILVAMRNLSDSATNeenltqliiklleirvandgmtacagtlslntcntrnk 288
DSSP HHHHHHHHHHHHHHHHLLL1111hhhhhhhhhh1111hhhhhhhhhhhh1111hhhh

DSSP -----
Query ----- 292
ident
Sbjct qtvchggidalvtairrlpeveevtepalcalrhctarhslaeaaqselrfcqafpvil 348
DSSP hhhhh111hhhhhhhhhh111hhhhhhhhhhhh11111hhhhhhhhhh111hhhh

DSSP -----
Query ----- 292
ident
Sbjct dqletlrvpikaalgvirnallqtnlieltqeqtanghtavslmtdilrraitaieen 408
DSSP hhhhh111hhhhhhhhhhhh111hhhhhhhh11111111hhhhhhhhhhhhhh111

DSSP -----
Query ----- 292
ident
Sbjct pdiavdgvpmwgiegavsalhqlanhpavaaacddigvgnpecppfldl1hr1lahp 468
DSSP 11leelleehhhhhhhhhhh111hhhhhhhhhh1111111111hhhhhhhhhh11h

DSSP -----
Query ----- 292
ident
Sbjct rlgsmdevlereilgilyqlskrpddgaravestgvsallmesrgsqykvsvtyangvls 528
DSSP hhh1111hhhhhhhhhhhh111hhhhhhhh111hhhhhh1111hhhhhhhhhh

DSSP -----

```

DSSP hhhhhh11

No 654: Query=mol1A Sbjct=5jnbC Z-score=3.2

[back to top](#)

```
DSSP 1111111111hhhhhhhhhhhh11LLHHHHHHHHHHHHHHHHHHLL111111LEEEE
Query aapyspntlrslrdrltqvaerqgVFGRLQRHVAXIVVAQFAATLTddtgaPLLVK 60
ident
Sbjct -----gamdvlsekiwdyhknvsqTDEMLQRKLRDMLYTAISPVF-----PLSGLY 48
DSSP -----11hhhhhhhhhhhh11LLHHHHHHHHHHHHHHHHHHLL-----LLEEEE
```

```
DSSP HHHhhhhhh1111LLL-----1LEEEEL-----1LHHHHHHHHHHHHH11
Query GGsslelrrgipdSRTS-----kDFATVAR-----rDIELIHEQLADAGETGwe 104
ident
Sbjct VV-----GSSLngfgnssdmDLCLMITnkdlqknDAVVVNLNLSTLQYE-- 95
DSSP EE-----HHHL11111111eEEEEEL11111111HHHHHHHHHHHHLL-----
```

```
DSSP LEEEEELLLEEL1111111LEEEEEEEe1LEEE-EEEEEEEL11111111eeeee1
Query GFTAIFTAPEElaapgxpvkPRRFYAKLSYrGRAF-ATVPIEVSSveagnadqfdlttsd 163
ident
Sbjct KLVESQKLILAK-----VPILRINF--APFDdITVALNANN----- 130
DSSP LEEEEEEEL-----LLEEEEL-----LLL1LEEEEL-----
```

```
DSSP hhhh111111eeeeel1hhhhhhhhhhhh11111111LLHHHHhhhhhh11hhh
Query alglvgpvaavpccxtipwqiaqkllhavtavleekandRAHDLVdlqllegllldadl 223
ident
Sbjct -----svairntHLLCY----- 143
DSSP -----1hhhhhhHHHH-----
```

```
DSSP hhhhhhhhhhh11111111111hhHHHHHLLL-LLLL-----
Query xptrsaciaifearaqhpwprvatlphwplIYAGaLEGL-DHLE----- 267
ident
Sbjct -----sSYDWrVRPLvSVVKewakrkgiftsyslv 173
DSSP -----hLLL1HHHHHhHHHHhhhh1111hhhh
```

```
DSSP -----1111hhHHH-----
Query -----lartvdaAAQA----- 278
ident
Sbjct lmvihflqcgptkvlpnlqqsypnrfsnkvdvrlnvmtALES1sekttlgelligfldy 233
DSSP hhhhhhhhh1111111hhhh1111111hhhh1111LLLh11hhhhhhhhhh
```

```
DSSP -----hhhhhhHLLL-----
Query -----vqrfvariDRATKR----- 292
ident
Sbjct yanefnydrdaisirqgRRVERAwrvcvciiepfkafreahgelqnhhdldklmec 289
DSSP hhh111111eeee111111111e1111111hhhhhhhhhh11hhhh11
```

No 655: Query=mol1A Sbjct=4amsA Z-score=3.2

[back to top](#)

```
DSSP 1111111111hhhhhhhhhhhh11LHHHHHHHHHHHHHHH11111111eEEE
Query aapyspntlrslrdrltqvaerqgVFGRLQRHVAXIVVAQFAa1tddtgap11LVK 60
ident
Sbjct -----shhhhhslvlfsgsliYTYKLEKYVVRTKIFPKI-----1lipdknRYI 44
DSSP -----111111111111LLHHHHHHHHHHHH-----1111hhHEE
```

```
DSSP HHHhhhhhhLLL1111LEEEEL-----1LHHHHHHHHHHHHH11eEEEELLLE
Query GGsslelrrGIPDSrtsKDFATVAR-----rDIELIHEQLADAGETGwefTAIFTAPEE 115
ident
Sbjct IK---gsfrRRVPfvtdIDVVNVVYpeisreNIYDEI1KLvNNIQSDP---NILAYLSC 98
DSSP EE---hhhLLL111eEEEEEL111111LHHHHHHHHHHHHLL-----LEEEEEEE
```

```

... ..
ident
Sbjct GTderfkistgsskelsniqslldneknfqlvlqkklfflneliwdhyklrwkpedvl 158
DSSP EE1hhhh111111hhhhhh111111hhhhhh111111hhhhhhhhhhhhheeeelhhhhh

DSSP -----1111LLLLEEEEEEEEel1EEEEEEEEEEEEELL111111leeeee
Query -----apgxPVKPRRFTAKLSyrgRAFATVPIEVSSVEagnadqfdltlts 162
ident
Sbjct igsmnlannvsvnfretveNNSTILLQYYVK-IgSYPVGIDVVINYQK----- 205
DSSP hleeeel1leeeehhhhhLLEEEEEEEEE-1LLEEEEEEEEEELL-----

DSSP lhhhh11111leeeel1hhhhHHHHHHHLL11111LLLlhhhhhhhhhh1lhhh
Query dalglvgpaavavpcxtipqiaQKQLHAVTAvleepkANDRahdlvdlqllegllldad 222
ident
Sbjct -----iDLTPAYKNA-----aLYQL----- 220
DSSP -----1LHHHHHHH-----hHHHH-----

DSSP hhhhhhhhhhhhh11111111111LHHHHHH-----hh11LLL-----
Query lxptrsaciaifearaqhpwprvatlpHWPLIYAG-----alegLDHL----- 266
ident
Sbjct -----qlansreyyym1FPLRYFYFKnnqdisqrLENIIEkkyglykqlm 265
DSSP -----hhhh111hhhhHHHHHHLL11hhhhhhHHHH111hhhhhhhh

DSSP -----
Query ----- 266
ident
Sbjct vriddyhtlyksnklidmatnivigilrdieklpgfesdtiyqikkvatnnspsikiee 325
DSSP hhhhhhhhhhh11111hhhhhhhhhhhhhh111111hhhhhhhhhh1111hhhhhhhh

DSSP -----11111hhhhhhhhhhhhhhhh1111
Query -----elartvdaaaqavqrfvaridrskr 292
ident
Sbjct wdillkvlyqeintavnksrkyfyryiamvppqdrsknyis 367
DSSP hhhhhhhhhhhhhhhhhhhhhhh1111hhhh111111

```

No 656: Query=mol1A Sbjct=1axnA Z-score=3.2

[back to top](#)

```

DSSP 1111111111hhhhhhhhhhhh1111hhhhhhHHHHHHHHHH-----11L
Query aapyspntnlrslrdrltqvaerqgvfgrlqrhVAXIVVAQFAA-----t1T 49
ident
Sbjct sasiwvghrgtvdrydpdfspvdaaeiaikairgigTDEKMLISILTersnaqrqlivkeY 60
DSSP 11111111111111111111hhhhhhhhhh1111LHHHHHHHHLL11hhhhhhhhhhH

DSSP LLL-LLLEeehhhhhhhh1111111LLEEeell1hhhhhhhhhhhh111leee
Query DDTG-APLLlvkgsslelrrgipdsrtsKDFATvarrdieliheqladagetgwegfta 108
ident
Sbjct QAAYgKELK-----ddlkgdlsghFEHL----- 83
DSSP HHHH1LLHH-----hhhh11hHHHH-----

DSSP ee11leel1111111leeeeeeeleeeeeeeeeell111111leeeelhhhh1
Query iftapeeiaapgxpvkprrrftaklsyrgrafatvpievssveagnadqfdltltsdalglv 168
ident
Sbjct ----- 83
DSSP -----

DSSP 1111leeeEELLHHHHHHHHHHHHLL11111LLLhHHHHHHHHHHLLHHHHHHHH
Query gvpavavpCXTIPWQIAQKQLHAVTAVleepkaNDRAhdLVDLQLEGLLLDADLXPTRS 228
ident
Sbjct -----mva1VTPPAVFDKQLKKSMMG-----AGTN--EDALIEILTTRTSRQMKDISQ 130
DSSP -----hhhhLHLLHHHHHHHHHHHHLL-----LLL--HHHHHHHHHHLLHHHHHHHH

DSSP HHHHHHHhh11111LLL1111hhhhhhhh1111111111HHHHHHhhHHHHH---
Query ACIAIFEaaraqhpwPRVAtlphwpliyagalegldhleartVDAAAQavQRFVAR--- 285
ident

```

```

DSSP -----
Query ----- 285
ident
Sbjct eslkvdehlakdaqilykagenrwtgedkfteilclrsfpqlkltfdeyrnisqkdiv 225
DSSP 111111hhhhhhhhhhhhhh1111111hhhhhhhhhhhhhhhhhhhhhhhh111hh

```

```

DSSP -----
Query ----- 285
ident
Sbjct dsikgelsghfedlllaiivncvrntpaflaerlhralkgigtdeflnrimvsrseidl1 285
DSSP hhhhhhh11hhhhhhhhhhhhhhhhhhhhhhhhhhhhhhhhhh111111hhhhhhhhhhhh111hh

```

```

DSSP -----hhh1111
Query -----idratkr 292
ident
Sbjct dirtefkkygyslysaisksdtsgdyeitllkicggdd 323
DSSP hhhhhhhhh111hhhhhhhhhhhhhhhhhhhhhhhh1111

```

No 657: Query=mol1A Sbjct=2nrkA Z-score=3.2

[back to top](#)

```

DSSP 1111111111hhhhhhhhhhhhHLLLLHHHHHHHHHHHHHHHHHHH11111111LEEEE
Query aapyspntnlrsldrqltqvaeRQGVVFGRLQRHVaxivvAQFAATltdtgapLLLVK 60
ident
Sbjct -----ivTEYQPAAVVEQFEeaaqaIKQILK-----ENCLK 30
DSSP -----11LLLLHHHHHHHHHHHHHHHHHHHH-----HHEEE

```

```

DSSP hhhhhhhhhL-----11111LEEEEE111HHHHHHhHHHHHHH111eEEEELLEEL
Query ggsslelrrGIPD----srtskDFATVArriELIHEqLADAGETGwegfTAIFTAPEEI 116
ident
Sbjct --vehigstSVPNlaakpiidflVIVVEE---IEKVDL-LQWEFERI---GYEYXGEFGL 80
DSSP --eeeehhHLLL111111leeeEEEEL---LHHHHH-HHHHHHHL---LLEELLLLL

```

```

DSSP 1111111111EEEEEEEE1LEEEEEEEEE1111111111leeehhhh111111lee
Query aapgxvxpRRFTAALSLYrGRAFATVPIEVSSveagnadqfdtltsdalglvgvpaavav 176
ident
Sbjct -----sGRRYLRKGP-IKRTHVHIYQFD---ntqeilrhlafrnylrenpaiatty 128
DSSP -----1LEEEEEEL-LLLLLEEEEEEL---1hhhhhhhhhhhhhhhhhhhhhhhh

```

```

DSSP eellhhhhhhhhhhhh11111111111L-----LHhhhhhhhhhhhh11hhhhhhhhhhhhhh
Query pcxtipwqiaqklhavtavIEPKA--NDRAHdlvdlqlllegl1ldadlxptrsaciaif 234
ident
Sbjct gtlkkqlaqahpdsidyxkDAFIKkIeKEAL----- 160
DSSP hhhhhhh111111hhhh11HHHHHHHHHHHH-----

```

```

DSSP hhh1111111111111111hhHHHHhh111111111111hhhhhhhhhhhhhhhhhh1111
Query earaqhpwpprvatlphwplIYAGalegldhlelartvdaaaqavqrvaridratkr 292
ident
Sbjct -----kKYWE----- 165
DSSP -----hHLLL-----

```

No 658: Query=mol1A Sbjct=4ud4A Z-score=3.2

[back to top](#)

```

DSSP 1111111111hhhhhhhhhhhhHLLLLHHHHHHHHHHHHHHHHHHH11111111LEEEE
Query aapyspntnlrsldrqltqvaeRQGVVFGRLQRHVAXIVVAQFAATLTdtgPPLLVK 60
ident
Sbjct -----shkeftkfcyevyeikISDKEFKRAALDTLRCLKRIS-----PDAELV 47
DSSP -----1hhhhhhhhhhhhhh11LHHHHHHHHHHHHHHHHHHHHHHL-----LLEEE

```

```

DSSP Hhhhhhh111111111111LEEEEEL--LHHHHHHHHHHHHHH111eEEEELLEEL11

```

```

DSSP  EE--1hhhh1111111111EEEEEL11LLLHHHHHHHHHHHHHL---LLEEEEEEL--
Query  pgxpvKPRRFATAKLSyrgRAFATVPIEVSSveagnadqfdt1tsdalglvgvpaavavpc 178
ident  |
Sbjct  -----RIP1IKLTSD-gfGASFQCDIGFN----- 122
DSSP  -----LLEEEEEEL-11LLLLLEEEEL-----

DSSP  11hhhhhhHHHHHH1111111111LLLHHHHHHHHHH11hhhhhhhhhhhhhhhh1
Query  xt1pwqiaQKLHAVtavleepkaNDRAhd1vd1qlleg11ldadlxptrsaciaifeara 238
ident  |
Sbjct  ----nr1aIHNTLL-----LSSY----- 136
DSSP  ----1hhHHHHHH-----HHHH-----

DSSP  111111111111LHHHHHHHHHL-LLL-----1111LHHHHH---
Query  qhpwpprvatlPWPVLIYAGALEG-LDHL-----elarTVDAAAQ--- 277
ident  |
Sbjct  -----tkLDAR-LKPMVLLvKHWAKrkqinspyfgt1ssygyvlmVLYYLIVhik 185
DSSP  -----hhLLL-HHHHHHHHHHHhh1111hh1111hhhhhhHHHHHH111

DSSP  -----
Query  ----- 277
ident  |
Sbjct  ppvfpn111splkqekivdgvdfgddkledippsqnysslgsl1hgffafyayafepre 245
DSSP  1111111111111111ee11ee111111hh111111111111hhhhhhhhhhhh11111

DSSP  --hhHHH--hhhHLLL-----
Query  --avQRFV--aridRATKR----- 292
ident  |
Sbjct  kvvtFRRPdgy1tkqEKGWTKdryilaiedpfeishnvgrtvssglyrirgefmaasr1 305
DSSP  1111LLL11111hhHLLL111111111111111111hhhh11hhhhhhhhhhhhhhhh

DSSP  -----
Query  ----- 292
ident  |
Sbjct  lnsrsypipyds1feeapi 324
DSSP  h1111111hhhh11111

```

No 659: Query=mol1A Sbjct=4xj6A Z-score=3.1

[back to top](#)

```

DSSP  1111111111hhhhhhhhhhhh11LLLHHHHHHHHHHHHHHHHH-LLL-----
Query  aapyspntnlrslrd1tqvaerqVVFGR1QRHVAXIVVAQFAA-TLTD----- 50
ident  |
Sbjct  ----p1wdfnnyshnm1dglisk1kISKTESDKLKALRQIVRERTRdVFQEarqvaidvr 55
DSSP  ----1ee1hhhh11111hhhh11LHHHHHHHHHHHHHHHHHHHHHHHHHHhhhhhhhhhh

DSSP  -----11LLEEEHHhhhhhh
Query  -----dtGAPLLL1VKGGSslelr 68
ident  |
Sbjct  rqaltlesvrlklektnvrylspeeradlarlifemedearddfIKFQPRFWTQ----- 109
DSSP  h1111hhhhhhhh111hhhh11hhhhhhhhhh111hhhhhhHHLLLEEEEE-----

DSSP  h111LLL-----1LEEEEL-----LLHHHHHHHHHHHHHL-LLEeE
Query  rgipDSRT-----sKDFATVAR-----RDIELIHEQLADAGETG-WEGftA 108
ident  |
Sbjct  gsfqYDTLnrp1hpgqemIDDGTYMPmtvfesepsIGHTLLLLVDTSLKSLeAENDgW 169
DSSP  hhh1LLL1111111111eeEEEEEEe11111111LHHHHHHHHHHHHHHHHHhHLLLE

DSSP  EELLLe1111111111EEEEEEe11EEEEEEEEELLLL1111111111eeelhhhh1
Query  IFTAPEeiaapxpvkpRRFTAALSyrgRAFATVPIEVSSVEAGnadqfdt1tsdalglv 168
ident  |
Sbjct  VFEEKN-----TCGR1KIY---REKTHIDVPMYAIPE----- 199
DSSP  EEEEL-----LLEEEEH---HHLEEEEEELEEEEL-----

```

```

Query   gvpaavavpcxTIPW-----qiaqKLHAVtavleepkaNDRAhdldlql  214
ident
Sbjct   -----VESDkvnalregvrrwsvspKIVED-----WFNE-----  230
DSSP    -----LLHHhleee111111lee11hHHHHH-----HHHH-----

DSSP    hhh11hhhhhhhhhhhhhhhh1111111111LLLHhHHHHHHHL-1LLL-----
Query   egllldadlxptrsaciaifearaqhpwprvatLPHWpLIYAGALE-gLDHL-----  266
ident
Sbjct   -----sCKRIG-GHLRSVCRfmKAWRdaqvevg  257
DSSP    -----hhHHHL-LHHHHHHhhHHHHhh1111

DSSP    -----111LLHHHHHHH-----
Query   -----elaRTVDAQA-----  278
ident
Sbjct   gpssislmtAVVNILDREshngsdlgtgmkliallpeefnrgvespddtdeklpfaes  317
DSSP    111hhhhhhHHHHHHHL11111hhhhhhhhhhhhhhhh11111111111111hh

DSSP    -----hhhhhhhh1111
Query   -----vqrfvaridratkr  292
ident
Sbjct   nhnvhhraivetmeglygillaaeqsesreealrkineafgkrvtallitss  370
DSSP    h11hhhhhhhhhhhhhhhh1111hhhhhhhhhhhh11111hhhleel

```

No 660: Query=mol1A Sbjct=2zocA Z-score=3.1

[back to top](#)

```

DSSP    111111111hhhhhhhhhhhh1111hhhhHHHHHHHHHH-----hh1LLL
Query   aapyspntnlrslrdlqtvaerqgvfgrlqRHVAXIVVAQF-----aatLTDD  51
ident
Sbjct   -matkggtvkaasgfnamedaqlrkamkgltDEDALISVLAYrntaqrqeirtaYKST  59
DSSP    -11111111111111hhhhhhhhhh11111LHHHHHHHLL11hhhhhhhhHHHH

DSSP    LLLLEeeehhhhhhh1111111LLEEee111hhhhhhhhhh1111eeeee1
Query   TGAPLLlvkggsslelrrgipdsrtsKDFAtvarrdieliheqladagetgwegftaift  111
ident
Sbjct   IGRDLI-----ddlkselsgNFEQ-----  78
DSSP    LLLLHH-----hhhhhlhHHHH-----

DSSP    1lee111111111leeeeeeeleeeeeeeeeee111111111leeeelhhhh1111
Query   apeeiaapgxpvkprfrftaklsyrgrafatvpievssveagnadqfdtltaldglvgvp  171
ident
Sbjct   -----  78
DSSP    -----

DSSP    1leeeeELLLLLLLLLLLLLL1111111111hHHHHHHHHHHLLHHHHHHHHHH
Query   aavavpCXTIPWQIAQKLHAVTAVLeepkandrahDLVDLQLEGLLLDADLXPTRSACI  231
ident
Sbjct   -vigmMTPTVLYDVQELRRAMKGA-----gtDEGCLIEILASRTPEEIRRISQTYQ  129
DSSP    -hhhhHLLHHHHHHHHHHHHHLL-----1LHHHHHHHHHHLLHHHHHHHHHH

DSSP    HHHHh1111LLL--LLL-----
Query   AIFEarahpWPPR--VATL-----  249
ident
Sbjct   QQYG--rslEDDIrsDTSFmfqrvlvslsaggrdegnylldalvrqdaqdlyeagekkw  186
DSSP    HHHL---11hHHHHhhHLLHHhhhhhhhh11111111111hhhhhhhhhhhh1111

DSSP    -----1lh
Query   -----phw  252
ident
Sbjct   gtdevkfltvlcrrnrh1lhvfdeykrisqkdieqsiksetsgsfedallaivkcmrnk  246
DSSP    111hhhhhhhhhh11hhhhhhhhhhhhhh111hhhhhhhh11hhhhhhhhhhhhhh1h

DSSP    hhhhhHLLLLL-----11111hhhhhhhh
Query   pliyagALEGLDH-----lelartvdaaav  279

```





```

-----
Sbjct -----melrhtpardldkfielh1LPNTCFRTQVKEAIDIVCRFLKeRCFQgTADPVRVs 55
DSSP -----11hhh11111hhhhhhhh11LLLHHHHHHHHHHHHHHHHHHHHHLL11LLLLLLEe

DSSP EEEHHhhhhhh1111111LLEEEEL-----1LHHHHHHHHHHHHHHHLLLE--
Query LVKGGslelrrgipdsrtsKDFATVAR-----rDIELIHEQLADAGETGWEgf-- 106
ident | | | |
Sbjct KVKVG-gssgkgttlrgrsdADLVVFLTk1tsfedqlrRRGEFIQEIRRQLEACQREQkf 114
DSSP EEEEL-111111111111LLEEEEL111111hhhhLHHHHHHHHHHHHHHHHHLL11

DSSP --eeEELLleel1111111leEEEEEE-eelleEEEEEEEEEL11LLLleeeel
Query --taIFTapeeiaapgxpkprRFTAKL-syrgraFATVPIEVSSVEagNADqfdt1tsd 163
ident |
Sbjct kvtfEVQS-----prrenprALSFVLSspqlqqEVEFDVLPAFDA--LGQW----- 158
DSSP 1leeEELL-----111111LLEEEEL111111EEEEEEEEEL--LLLL-----

DSSP hhhh11111leeeel1hhhhhhhhhhhh1111111111hhhhhhhhhh11hhhh
Query alglvgvpaavavpcxtipwqiaqklhavtavleepkandrahd1vdlqllegl1ldadL 223
ident
Sbjct -----tpG 161
DSSP -----11L

DSSP HHHhHHHHHHHHHLL-----
Query XPTrsACIAIFEARAQH----- 240
ident
Sbjct YKP--NPEIYVQLIKECKsrgkegefstcftelqrdf1nrprtklkslirlvkhwyqtck 219
DSSP LLL--LHHHHHHHHHHhh111111hhhhhhhhhh111111hhhhhhhhhhhhhhhhhh

DSSP -----1111111LLLHHhhhhhh1111111111LHHH-----
Query -----pwprvaTLPWPIiyagalegl dhlelarTVDA----- 274
ident
Sbjct kthgnklppqyale1LTVYAW-----egSRKTdfstaqgfqtvlvlkh 265
DSSP hhh11111hhhhhhHHHHH-----h11LLL111hhhhhhhhhhhh1h

DSSP hhhhHHHHhhHHHL-----
Query aaqavQRFVarIDRA----- 289
ident |
Sbjct qklciFWEA-yYDFtNpvgrcmlqqlkkprpvildpadptgnvggdthswqrlaqear 324
DSSP hhleeLLL-1LLL1hhhhhhhhhh11111ee111111111111hhhhhhhhhhhh

DSSP -----111
Query -----tkr 292
ident
Sbjct vwlgypccknldgslvgawtml 346
DSSP hh111hhhh111111111111

```

No 663: Query=mol1A Sbjct=4x4vC Z-score=3.1

[back to top](#)

```

DSSP 111111111hhhhhhhhhhhh1LLLHHHHHHHHHHHHHHHHHLL111111EEEE
Query aapyssptnlrslrdrltqvaerqGVVFGRLQRHVXIVVAQFAATLTddtgap1LLVK 60
ident | |
Sbjct -----veeilekalelviPDEEEVRKGREAEELRRRLDELG-----VEYV 41
DSSP -----1hhhhhhhhhh1LHHHHHHHHHHHHHHHHHHHLL-----LLEE

DSSP HHHhhhhhh111111LLEEEEL-----LLHHHHHHHHHHhh1111eeEEELLE
Query GGslelrrgipdsrtsKDFATVAR-----RDIELIHEQLADAGetgwegftAIFTAPE 114
ident | | |
Sbjct FV-gsyarntwkgslleIDVFLLPeefskeELRERGLEIGKAVL-----DSYEIRY 92
DSSP EE-11hhh1111111eEEEEEL1111hhHHHHHHHHHHHLL-----LEEELL

DSSP EL11111111EEEEEEElleeEEEEEEEEELLL1111leeeelhhhh11111e
Query EIaapgxpkprRFTAKLSyrgraFATVPIEVSSVEAGnadqfdt1tsdalglvgvpaav 174
ident |
Sbjct AE-----hPYVHGvvK----GVEVDVVPCYKlKE----- 117

```

DSSP eeee11hhhhhhHHHHHHHh11111111LLHhhhhhhhhhh11hhhhhhhhhhhhhh  
Query avpcxtipwqiaQKLHAVtavleepkanDRAHdlvdlqlleg11ldadlxptrsaciaif 234  
ident  
Sbjct pkniksavdrtpFHHKWL-----EGRI----- 139  
DSSP 11111111hhHHHHHH-----HHHL-----

DSSP hhh11111111111111hhHHHHHLL-LLLL-----1111LHHH  
Query earaqhpwpprvatlphwplIYAGALEG-LDHL-----elarTVDA 274  
ident  
Sbjct -----kGKENEVRLKGFkangiyaeykvrfgsylvcellIVFY 180  
DSSP -----1LHHHHHHhhHHHHhh111111111111hhhhhhHHHH

DSSP H-----hHHHH-----hHHHH-----  
Query A-----aqAVQR-----fvARID----- 287  
ident  
Sbjct GsfletvknarrwtrrtviDVAKgevrkgeeffvvdvdeKRNvaanlsldnlarfvhlc 240  
DSSP L1hhhhhhhh111111eeE111111eeE111111eeE111111hhhhhhhhhh

DSSP -----  
Query ----- 287  
ident  
Sbjct refmeapslgffkpkieperlrkiveergtavfavkfrkpdiddnlypqlerasrkife 300  
DSSP hhhhh111hhhh11111hhhhhhhhhh1leeeeeee11111hhhhhhhhhhhhhhhh

DSSP -----  
Query ----- 287  
ident  
Sbjct flerenfmplrsafkaseefcyllfecqikeisrvfrmgpqedernvkkflsrnrafr 360  
DSSP hhhhh111leeeeeee111leeeeeee111111leeeeeee111hhhhhhhhhh111111

DSSP -----  
Query ----- 287  
ident  
Sbjct pfiengrwwafemrkfttpeegvrsyasthwhtlgknvgesireyfeiiisgeklfkepv 420  
DSSP leee1leeeeeee11111hhhhhhhhhh1hhhh11hhhhhhhhhh1leee1hhhh1111h

DSSP -----h1111  
Query -----ratkr 292  
ident  
Sbjct aelcemmgvkd 431  
DSSP hhhhhhh1111

No 664: Query=mol1A Sbjct=3wfgH Z-score=3.0

[back to top](#)

DSSP 1111111111hhhhhhhhhhhhhh1111hhhhhhhhhhHHHHHHHLL11111LLEEEE  
Query aapyspntnlrslrdrltqvaerqgvfgrlqrhvaxIVVAQFAATLtddtgAPLLLVK 60  
ident  
Sbjct -----xxxglnfyLSYFDDVAKV---lpREHYCFI 28  
DSSP -----11111111LLHHHHHLL---11LLEEEE

DSSP HHHHHHHHLL-111111LEEEEL1LHHHHHHHHHHHHhh1111eeEELLEEE1111  
Query GGSSLELRGIP-dsrtskDFATVARrDIELIHEQLADAGEtgwegftaIFTAPEEiaap 119  
ident  
Sbjct VGGWVRDRILGEpvgynidVDFLTA-DPVELAKNFAKRIG-----GHFFVFE---- 75  
DSSP ELHHHHHHHLL1111eeELEEEL-LHHHHHHHHHHHLL-----LEEEEL----

DSSP 1111LLEEEEEEEe1LEEEEEEEEEELLLL1111eeee1hhhh111111eeeee1  
Query gxpvrPRRFTAKLSyrGRAFATVPIEVSSVEAGNadqfdtltsdalg1vgvpaavavpcx 179  
ident  
Sbjct ---PTIASVVLH---LPPYRFRDFSPIKGDLD----- 102  
DSSP ---LLEEEEEEE---LLEEEEEEEEE1LLLH-----

DSSP 1hHHHHHHHHhhhh1111111111hHHHH-----HHHHhh11hh

```

Sbjct  CNRLEDSK          SDR HMDLGRHMDGVAQVYFQPTGK          219
DSSP  -hHHHHHHHHH-----1LLHHHhleeehhhh1111ee1LLHHH-----

DSSP  hhhhhhhhhhhhhhh11111111LLL-----1hhhhhhhhhLLLL1111LLHH---
Query  dlxptrsaciaifearaqhpwprVATL-----phwpliyagalEGLDHlelaRTVD--- 273
ident
Sbjct  -----dleqglrpvSIENlkrdpvrvlrgfriaieKNLQ----LTEDfye 182
DSSP  -----hhhhlee111LHHHhh111hhhhhhhhHLLLE----ELHHhhh

DSSP  -----
Query  ----- 273
ident
Sbjct  fvkedprivlksaverithelfkimkektahkvirelyeygvleaiipeigrlevkdpl 242
DSSP  hhhh1hhhh111hhhhhhhhhhhh111hhhhhhhhhh11hhhh1hhhh1111111h

DSSP  -----
Query  ----- 273
ident
Sbjct  dehtlktleyleqviedrakylsaellenfgkkrvlgeftdvellkwgalfhdigkptf 302
DSSP  hhhhhhhhhhhhh1hh111hhhh1111111111111111hhhhhhhhhh1111111111

DSSP  -----
Query  ----- 273
ident
Sbjct  afyehdkvgaqivreigerlrwgdeatefvaklvrrhlrpfflreafkkgelkrngmanf 362
DSSP  1111hhhhhhhhhhhh1111hhhhhhhhhhhhhhhhhhhhhhhhhh11111hhhhhhhh

DSSP  -----
Query  ----- 273
ident
Sbjct  wrecgdiaphlflsiadamasgdeedikalmetiaelesfnrnemxxxxxxxxxxxx 422
DSSP  hhh1111hhhhhhhhhhhh1111hhhhhhhhhhhhhhhhhhhhhh11111hhhhhhhhhh

DSSP  hhhhhhhhhhhhh1111
Query  aaaqavqrfvaridratkr 292
ident
Sbjct  xxxxxxxxxxxxxxxxxxxx 441
DSSP  hhhh1hhhhhhhhhh1111

```

No 665: Query=mol1A Sbjct=3m62A Z-score=3.0

[back to top](#)

```

DSSP  -----
Query  ----- 0
ident
Sbjct  spefrsmtaiedilqittdpsdtrgysllkseevpqgstlgvdfidtl1lyqltenekld 60
DSSP  1hhhhhhhhhhhhlee11111111lee1111111111111111hhhhhhhhhh1111111111

DSSP  -----
Query  ----- 0
ident
Sbjct  kpfeylndcfrnrqqkritknkpnaslhstfqeidlrvigygvalqienfcmngafi 120
DSSP  1hhhhhhhhhhhhhhhhhh1111hhhhhhhhhhhhhhhhhhhhhh1111111111hh

DSSP  -----LLL
Query  -----AAP 3
ident
Sbjct  nyitgivsnvnsytdflsqiirailegtaldllnavfptlleycnkhvshfdlnesVIY 180
DSSP  hhhhhhh1hh11hhhhhhhhhhhh11hhhhhhhhhhhhhhhh111111111hHHH

DSSP  LLL-----1LHHHHHHHHHHHHHLL-----
Query  YSSP-----ptNLRSLRDRLTqVAERQ--- 25
ident
Sbjct  NNVLtifelfvtfkpiaiefktdgffadysckpqdferktILGPILSLSP-IEAAVair 239
DSSP  HHHHHhhhhhh11hhhhhhhh1111111111hhhhhh1LHHHHLLLL-LLHHHHhh

```

|       |                                                                     |     |
|-------|---------------------------------------------------------------------|-----|
| Query | -----                                                               | 25  |
| ident |                                                                     |     |
| Sbjct | nygdnlrskqqtamiheslqaehkvvdrffivdklvrgslnsrtdmisyfahiankn           | 299 |
| DSSP  | hllllllllllllllllllllllllllllllllllllllllllllllllllllllllllll       |     |
| DSSP  | -----111hhHHHHHHHHHHHHHHHLL1111LLLLeeeehhhhhhhh11111                |     |
| Query | -----gvvfgRLQRHVAXIVVAQFAATLtdtGAPL1lvkqgsslelrrgipdsr              | 75  |
| ident |                                                                     |     |
| Sbjct | hlrradhppfkelssNGFMSNITLLLVRFSSQPF--1DISY-----                      | 337 |
| DSSP  | hhhh11111hh111HHHHHHHHHHHHHHHH--hLLL-----                           |     |
| DSSP  | 111leeeeeLLLHHHHHHHHHHHHHH111leeeel1LEEL-----                       |     |
| Query | tskdfatvaRRDIEliheqladagetgwegftaiftaPEEI-----                      | 116 |
| ident |                                                                     |     |
| Sbjct | -----kkIDKID-----anYFNNpslfidlsgetrlnsdfke                          | 369 |
| DSSP  | -----11HHHLL-----11LLL1111111111111111hh                            |     |
| DSSP  | -----111111111leeEEEEeeellleeEEEE-----                              |     |
| Query | -----aapgxpkprFTAKlsyrgrafaTVPI-----                                | 144 |
| ident |                                                                     |     |
| Sbjct | adafydknrktadskpnfiscFFLT-----1TYLHyglggtlsfeekmgseikalk            | 421 |
| DSSP  | hhhhhh1111111111hhhhHHHH-----hHHHH1hhhhhhhh1hhhhhhhh                |     |
| DSSP  | -----                                                               |     |
| Query | -----                                                               | 144 |
| ident |                                                                     |     |
| Sbjct | eeiekvkkiaanhdvfarfitaqlskmekalktteslrfalqgffahrslqlvdficg          | 481 |
| DSSP  | hhhhhh1111111111hhhhhhhhhhhhhhhhhhhhhhhhhhhhhh1hhhhhhhhhh           |     |
| DSSP  | ----eeEELL-----                                                     |     |
| Query | ----evSSVE-----                                                     | 150 |
| ident |                                                                     |     |
| Sbjct | astflirVVDpehefpfkqiklplipdqvndafnrahapvpfkyypefvvegpnysl           | 541 |
| DSSP  | hhhhhhHHHLL111111111111111111111111111111hhhhhh11111hh111hhhhhhhhhh |     |
| DSSP  | -----1111LLLLeeeelhhhh11111leeeeeLLHHHHHHHHHHHHh1111111L            |     |
| Query | -----agnaDQFDtltaldalvgvpaavavpcXTIPWQIAQKLHAVtavlepkaN             | 202 |
| ident |                                                                     |     |
| Sbjct | yiskyqtspifrNPRL-----GSFVEFTTMVLRCP-----elvS                        | 575 |
| DSSP  | hh1111111111LLH-----HHHHHHHHHHHLL-----111L                          |     |
| DSSP  | LLLHHHHHHHHHHHLL-----LHHHHHHhhHHHHhhhh11111LLL--LLL                 |     |
| Query | DRAHDLVDLQLLEGLL-----LDADLXPtrSACIAIfearaqhwpPRVA--TLP              | 250 |
| ident |                                                                     |     |
| Sbjct | NPHLKGLVQLLSVGAmpLtdnspgfMMDIFEH-dELVNKN-----llyalLDFYviVEK         | 629 |
| DSSP  | LHHHHHHHHHHHHHHH111111111LHHHHHH--1HHHHH----hhhhHHHHhhHH            |     |
| DSSP  | LhhHHHHhh1111111111LHHHHHHHHHHHHHHH-HLLL-----                       |     |
| Query | HwpLIYAga1e1dhlelarTVDAAAQAVQRFVARID-RATK-----                      | 291 |
| ident |                                                                     |     |
| Sbjct | T-gSSSQ-----fyDKFNRSYISISIILEELYKIPSYknqliwqsqnnadffvr              | 677 |
| DSSP  | L-1LLL-----11LHHHHHHHHHHHHHHHHHLLHHhhhhhhhhhh1hhhhhh                |     |
| DSSP  | -----                                                               |     |
| Query | -----                                                               | 291 |
| ident |                                                                     |     |
| Sbjct | fvarmlndltflldeglsnlaevhniqneldnrgareedkelqtrlasasrqakss            | 737 |
| DSSP  | hhhhhhhhhhhhhhhhhhhhhhhhhhhhhh111111111111111111hhhhhhhhhh          |     |
| DSSP  | -----                                                               |     |
| Query | -----                                                               | 291 |
| ident |                                                                     |     |
| Sbjct | cgladksmklfeiskydipaafvtpeivrylasmlnynleslvgpckgelkvkdpqsysf        | 797 |
| DSSP  | hhhhhhhhhhhhhhhhhh1hhhh11hhhhhhhhhhhhhhhhhhhh1hhhh11111111          |     |
| DSSP  | -----                                                               |     |







```

-----
Sbjct kthgnklppqyalellTVYAWE-----qgSRKTdfstaqgfqtvlvlk 264
DSSP hhhhhhl1lhhhhhhHHHHHH-----1LLLLL1lhhhhhhhhhhhhhl

DSSP -hhhhHHHHhhHHHL-----
Query -aaqavQRFVarIDRA----- 289
ident |
Sbjct hqklciFWEA-yYDFtnpvvgrcmllqkpkprpvildpadptgnvggdthswqrlaqea 323
DSSP hhhleeLLLL-LLLLlhhhhhhhhhhhl1l1leel1l11leel1lhhhhhhhhhh

DSSP -----111
Query -----tkr 292
ident
Sbjct rvwlgypccknldgslvgawtml 346
DSSP hhl1lhhhl1l1l1l1l1l1l1l1

```

No 670: Query=mol1A Sbjct=3zymC Z-score=3.0

[back to top](#)

```

DSSP 1l1l1l1l1lhhhhhhhhhhhhhh1l1lhhhhhhhhhhhhhhhh1l1l1l1leeee
Query aapyssptnlrslrdrltqvaerqgvfgrlqrhvaxivvaqfaatltddtgapllvk 60
ident
Sbjct -----sltdritaahsvtgsavsktvcka 25
DSSP -----lhhhhhhhh1lhhhhhhhhhh

DSSP hhhhhhhhh1l1l1l1leeee1LLHHHHHHHHHHHHHL--1leeee1leel1
Query ggsslelrrgipdsrskdfatvarRDIELIHEQLADAgETGW--egftaiftapeeiaa 118
ident |
Sbjct ttheimgpkkkhldyliqctnemvnNIPQLADSLFERT-TNSSwvvvfkslitthlmvy 84
DSSP 1l1l1l1l1lhhhhhhhhhhhh1l1lLHHHHHHHHHHHL-LLLlhhhhhhhhhhhhhh

DSSP 1LLLL---LEEE-EEEE-----e1leeeeeeeeeee1l1l1l1leeeelhh
Query pgXPVK---PRRF-TAKL-----syrgrafatvpievssveagnadqfdlttsdal 165
ident |
Sbjct gnERFIqylASRntLFNlsnflksglqgydstfirrysrylnekavsyrqvfdfkv 144
DSSP 1HHHHHHHHHL1LLLL1l1l1l1lhhhhhhhhhhhhhhhhhhhhhh1l1l1l1

DSSP hhl1l1leeeeLHHHHHHHHHHHHHL--LLLL-----1l1l1LHHH
Query glvgvpaavavpcXTIPWQIAQKLHAVTA--VLEE-----pkandRAHDL 208
ident |
Sbjct krgadgvmrmtmteKLLKTVPIIQNQMDA1lDFNVnsnelngvinaafmlfkdaIRLF 204
DSSP 1l1l1l1hhhl1hHHHHHHHHHHHHHHhhL1l1hhhl1lhhhhhhhhhhHHHHHH

DSSP HHHHHHHHH--LLHH----hhHHHHhhhhhhhh1l1l1LLLL--LLLL1HHHHhh
Query VDLQLEGL--LLDA----dlxPTRSaciaifearaqhpPPRV--ATLPhWPLIyaga 259
ident |
Sbjct AAYNEGIIN1EKYFdmknqckEGLD-----iykkfLTRMtrISEF-LKVA---- 250
DSSP HHHHHHHHHhhHHHH1lhhhhHHHH-----hhhhHLLHhhHHHH-HHHH----

DSSP h1l1l1l1l1LHHHHHHHHHHHHHHHHL11
Query legldhle1aRTVDAAAQAVQRFVARIDRATkr 292
ident | |
Sbjct --eqvgrnlqSEVEGVKNIMTQNVERILARG-e 280
DSSP --hh1l1hhHHHHHHHHHHHHHHHHHHHL-1

```

No 671: Query=mol1A Sbjct=1yluA Z-score=3.0

[back to top](#)

```

DSSP 1l1l1l1l1lhhhhhhhhhhhhhh1l1lhhhhhhhhhhhhhhhh1l1l1l1LLeeee
Query aapyssptnlrslrdrltqvaerqgvfgrlqrhvaxivvaqfaatltddtGAPL1lvk 60
ident
Sbjct -----SQKH---- 4
DSSP -----LLLL----

```



```

Query  ggsslelrrgipdsrtskdfatvarrdieliheqladagetgwegftaiftapeeiaapg 120
ident
Sbjct  ----- 4
DSSP  -----

DSSP  llllleeeeeeeelleeeeeeeeeeeellllllllLEeeeehlllllleeeeeLL
Query  xpvkprrf taklsyrgrafatvpi evssveagnaDQFDtltsdalglvgvpaavavpcXT 180
ident
Sbjct  -----1qINQR-----fEE 13
DSSP  -----11HHHH-----hHH

DSSP  HHHHHHHHHHHHH-hLLLL-LLLL-----
Query  IPWQIAQKLVAV-tAVLE-EPKA----- 201
ident
Sbjct  LRLITQDTENELkkLQQTqEYFIIiqyqeslriqaqfaqlgqlnpqermsretalqqkqvs 73
DSSP  HHHHHHHHHHHHHHHHHHHHHHHHHHHHHHHHHHHHHHHHHHHHHHHHHHHHHHHHHHHHHHHHH

DSSP  -----11LLHHHHHHHHHHHHH-----
Query  -----ndRAHDLVDLQLEGL----- 218
ident
Sbjct  letwlgreaqtlqqyRVELAEKHQKTLQLLrkqqtiiLddeliqwkrqqlagnggpppeg 133
DSSP  hhhhhhhhhhhhhhhhhhhhhhhhhhhhhhhhhhhhhhhhhhhhhhhhhhhhhhhhhhhhhhhhh

DSSP  -----1hHHHHHHHHHHHHHHHHHHHHHHHHHHHHHHHHHHHHHHHHHHHHHHHHHHHHHH
Query  -----ldADLXPTRsaciaifearaqhpwppRVAT--LPHWPLiyagalegldhlela 269
ident
Sbjct  sldvlqswcEKLAEEI-----wqnrqqiRRAEh1CQQLPI-----p 169
DSSP  11hhhhhhhhhhhhhhhhhhhhhhhhhhhhhhhhhhhhhhhhhhhhhhhhhhhhhhhhhhhhhhhh

DSSP  LLHHHHHHHHHHHHHHHHHHHHHHHHHHHHHHHHHHHHHHHHHHHHHHHHHHHHHHHHHHHH
Query  RTVDAAAQAVQRFVARIDR-ATKR----- 292
ident
Sbjct  GPVEEMLAEVNATITDII SaLVTStfiiekppqvlktqtkfaatvrllyvgklnvhmnp 229
DSSP  LLHHHHHHHHHHHHHHHHHHHHHHHHHHHHHHHHHHHHHHHHHHHHHHHHHHHHHHHHHHHH

DSSP  -----
Query  ----- 292
ident
Sbjct  pqvkatiiseqqakslknentrcnecsgeilnccvmeqhqtglsahfrnmslkresv 289
DSSP  1leeeeeehhhhhhhhhhhhhhhhhhhhhhhhhhhhhhhhhhhhhhhhhhhhhhhhhhhhhhh

DSSP  -----
Query  ----- 292
ident
Sbjct  teekftvlfesqfsvgsnelvfqvtlslpvvivi hgsqdhnatatlwdnafaeprvp 349
DSSP  hhleeeeeeeeeel1111leeeeeel1leeeel1111hhhhhhhhhhhhhhhhhhhhhhhhhhhh

DSSP  -----
Query  ----- 292
ident
Sbjct  favpdkvlpqclcealnmkfkaevqsnrgltkenlvflaqklfnissnhledynsmsvsw 409
DSSP  1111leehhhhhhhhhhhhhhhhhhhhhhhhhhhhhhhhhhhhhhhhhhhhhhhhhhhhhleeh

DSSP  -----
Query  ----- 292
ident
Sbjct  sqfnrenlpgwnytfwqwdgvmevlkhhkphwndgailgvnkqqahdlinkpdgtf 469
DSSP  hhhh1111111111hhhhhhhhhhhhhhhhhhhhhhhhhhhhhhhhhhhhhhhhhhhhhhhhhh

DSSP  -----
Query  ----- 292
ident
Sbjct  llrfsdseiggitiawkfdspdrnlwnlcpfttrdfsirsladrlgdlnyliyvfpdrpk 529
DSSP  eeeee1111leeeeeel11111111leeeeehllllllllhhhhhhhhhhhhhhhhhhhhhhhhhhhh

```

DSSP hhh1111111111

### No 672: Query=mol1A Sbjct=5tgqA Z-score=2.9

[back to top](#)

DSSP 1111111111hhhhhhhhhh11LHHHHHHHHHHHHHHHLL--LLLL111lee 58  
Query aapyspntnlrslrdrltqvaerqgvVFGRLQRHVAXIVVAQFAATL--TDDTgap11  
ident  
Sbjct -----MNFKKYEENLVASIEEVIQRIIdDKHR----- 27  
DSSP -----LHHHHHHHHHHHHHHHHHhLLLL-----

DSSP eehhhhhhh1111111111eeeeeLLHHHHHHHHHHHH--HLLL1EEEEELLE--E 115  
Query vkqgsslelrrgipdsrtskdfatvarRDIELIHEQLADAGE-TGWEgFTAIFTAPE--E  
ident  
Sbjct -----pniigktrvgaEVSDYLEDEFVKYISsGKSS-SLYDAQGAPkeK 70  
DSSP -----11111111hhhHHHHHHHHHHHHHHHLLL-LEEEEEELL1L

DSSP LLL1111111eEEEEEEE11EEEEEEEEEEEL-LLLL----- 153  
Query IAApaxpkprRFTAKLSYrgRAFATVPIEVSSV-EAGN-----  
ident  
Sbjct TKN-----pwDARCKFKF-mDREEEIWIIDFKAFkITNmSnpdigtpnkivkfihegnf 123  
DSSP LLL-----11LEEEEEEE-1LEEEEEEEEEEEeHHHL111lee1hhhhhhhh111

DSSP -----1LLEEeeelhhhh111111eeeee1hhhhhhhhhh11 195  
Query -----adQFDT1tsdalglvgvpaavavpctxtipwqiaqklhavtav  
ident  
Sbjct ylvfvlyyveskqdgvefvkYNND-----ykkvy 152  
DSSP eeeeeeeeeee1leeeelLLL-----leee

DSSP 11111111LHHHHHHHHHH11hhhhhhhhhhhhhh111111111111HHHH 255  
Query leepkaNDRAHD1vdlqlleg1l1dadlpxtrsaciaifearaqpwpvratlphWPLI  
ident  
Sbjct 1lkdvnsEFRIN-----pkpmqvniaaeptyrtreefihfFVKK 192  
DSSP ehhl11LLEEE-----11lee1111111111hhhhhhHHHH

DSSP HHHhh1111111111hhhhhhhhhhhhhh111 292  
Query YAGaleglhdlleartvdaaaqavqrfvaridratr  
ident  
Sbjct WKE---sferqikslekkeimkdledklknsndnsi 226  
DSSP HHH---hhhhhhhhhhhhhhhhhhhhhh

### No 673: Query=mol1A Sbjct=4x4wA Z-score=2.9

[back to top](#)

DSSP 1111111111hhhhhhhhhhHLLLLHHHHHHHH--HHHHHHHHHLL111111LEEE 59  
Query aapyspntnlrslrdrltqvaerQGVVFGRLQRHV-AXIVVAQFAATLddtdgapLLLV  
ident  
Sbjct -----mftMKLQSPEFQSLFteGLKSLTELVKE-----NHEL 33  
DSSP -----1111111111LHHHHHHHHHLLH-----LLE

DSSP EHHhhhhhh11111111LLEEEEE11HHHHHHHHHHhh1111eeEELLlee111 118  
Query KGGsslelrrgIPDSRTS-KDFATVArRDIELIHEQLADAGetgwegftAIFTApeeiaa  
ident  
Sbjct RIA-ggavrd1LNGVKPQdIDFATTA--tPTQMKEMFQSAG-----IRMIN----- 76  
DSSP EEE-1hhhhhhHLLLLL1LEEEEL--1HHHHHHHHHHL-----LEEEL-----

DSSP 11111111EEEEEEEe1leeEEEEEEEEe1111111111eeeee1hhhh111111eeeee 178  
Query pgxpvpkRRFTAKLSyrgaFATVPIEVSSveagnadqfdtltsdalglvgvpaavavpc  
ident  
Sbjct -----GTITARLH-----EENFEITTL-----ridvttdgaev 104  
DSSP -----LEEEEEEL-----LEEEEEEL-----eeee1111lee



DSSP 111LHHHH-----hhhhh111111111hh  
Query tlpHWPLI-----yagaleglhdhlelartvd 273  
ident  
Sbjct -arQAIEAilafprvpvgfaadwltclglveersarstaaaaerxvrgvlexlptdpd11 239  
DSSP -hhHHHHHHhh11111111hhhhhhhh11111111hhhhhhhhhhhhhh11111111hhhh

DSSP hhhhhhhhhhhhh1111  
Query aaaqavqrfvaridratkr 292  
ident  
Sbjct gediarlxnagllekyvqq 258  
DSSP lhhhhhhhhhh1hhhhhh1

No 675: Query=mol1A Sbjct=laeiA Z-score=2.9

[back to top](#)

DSSP 111111111hhhhhhhhhhhh1111hhhhhhhhHHHHHHHHHHLL11111LLEeee  
Query aapyspsptnlrslrdrltqvaerqgvfgrlqrhvAXIVVAQFAATLtddtgAPLLlvk 60  
ident  
Sbjct -----vvqgtvkvphasfnsredaetlrkamkigtDEKSITHILATR---snAQRQ--- 48  
DSSP -----111111111111hhhhhhhhhh11111LHHHHHHHHLL---lhHHHH---

DSSP hhhhhhhhh111111111leeeeELLLH---HHHHhhhhhhhh1111leeee11leell  
Query ggsslelrrgipdsrtskdfatvARRDI---ELIHeqladagetgwegftaiftapeeia 117  
ident  
Sbjct -----qiKTDYt1fGKHL----- 62  
DSSP -----hhHHHHhhhhLLLH-----

DSSP 1111111eEEEEeeelleeeeeEEEEe1111111leeee1hhhh11111leeee  
Query apgxpvkprRFTAklsyrgrafatvPIEVssveagnadqfdt1tsdalglvgvpaavavp 177  
ident  
Sbjct -----ede1KSEL-----sgnYEAA-----alal 81  
DSSP -----hhhhHHHL-----lhHHHH-----hhhh

DSSP ELLHHHHHHHHHHHHLL111111LLLhHHHHHHHHHHLLHHHHHHHHHHHHHHhh  
Query CXTIPWQIAQKLHAVTAveepkaNDRAhDLVDLQLEGLLDADLXPTRSACIAIFEar 237  
ident  
Sbjct LRPDEFLEAEQLHAAMK-----GLGT-DENALIDILCTQSNQAIIHAIKAAFKLLYK-- 131  
DSSP HLLHHHHHHHHHHHHHL-----LLL-LHHHHHHHHLLHHHHHHHHHHHHHHHL--

DSSP 111LLL--LLL111hhhhhhhh1111111111hhhhhhhhHHHHHHHLLL----  
Query aqhPWPP--RVATlphwplyagaleglhdhlelartvdaaaqavqRFVARiDRATK---- 291  
ident  
Sbjct --eDLEKEiISET-----sgnfqrLLVSM-LQGGRkede 162  
DSSP --1LHHHHhhHHHL-----1hhhhHHHHH-HLLL1111

DSSP -----  
Query ----- 291  
ident  
Sbjct pvnaahaedaaiyqagegigtdesrfnavlratrsypqlhqifheyskiskntilqai 222  
DSSP 111hhhhhhhhhhhh11111111hhhhhhhhhh11hhhhhhhhhhhh1111hhhh

DSSP -----  
Query ----- 291  
ident  
Sbjct enefsgdikngllaivksvenrfayfaerlhamkglgtsdktlirilvsrseidlanik 282  
DSSP hhh11hhhhhhhhhhhhhhhhhhhhhh1111111hhhhhhhhhh1111hhhh

DSSP -----1  
Query -----r 292  
ident  
Sbjct etfqamygkslyefiaddcsgdykdlllqitgh 315  
DSSP hhhhhhh111hhhhhhhh11hhhhhhhhhh11



```

ident
Sbjct -----qHLE 4
DSSP -----1LLL

DSSP HHHHHHHHHHHHHLL11111LLL-HHHHHHHHHHHHL-LHHHHHHhhhhhhhhhh1
Query IPWQIAQK1HAVTAVleepkaNDRA-HDLVDLQLEGLL-LDADLXptrsaciaifeara 238
ident
Sbjct KSAVLQEA-RVFNET-----PINPrKCAHILTKILYLInQGEHLG-----t te 46
DSSP HHHHHHHH-HHLLL-----LLHhHHHHHHHHHHHHHhLLLLL-----hhh

DSSP 11111LLL--LLLHhHHhhhh111111111LHHHHHHHHHHHHHHHH-----
Query qhpwpPRVA--TLPHWPliyagalegldhlelarTVDAAAQAVQRFVARIDR----- 288
ident
Sbjct ateafFAMTk1FQSNDP-----TLRRMICYLTIKEMSCIAEdviivtss 89
DSSP hhhhhHHHHhhHLLLH-----HHHHHHHHHHHHHLLL11hhhhhhh

DSSP -----
Query ----- 288
ident
Sbjct ltkdmtgkedsyrgpavralcqitdstmlqaierymkqaivdkvpsvssalvss1h1lk 149
DSSP hhhhh111hhhhhhhhhhhh11111hhhhhhhhhhhh1111hhhhhhhhhhhh11

DSSP -----
Query ----- 288
ident
Sbjct csfdvvrwvneaqeassdnimvqyhalglllyhvrkndrlavskmiskftrhgkspfa 209
DSSP 11hhhh11hhhhhh11111hhhhhhhhhhhh11hhhhhhhhhh11111hh

DSSP -----1111
Query -----atkr 292
ident
Sbjct ycmmirvasrqslrnkhemvveyeasainnavsvlqlfcsspkaalryaavrt1 264
DSSP hhhhhhh111111111hhhhhhhhhh11111hhhhhh11111hhhhhh11

```

No 678: Query=mol1A Sbjct=3ov7B Z-score=2.9

[back to top](#)

```

DSSP 111111111hhhhhhhhhh1LLLHHHHHHHHHHHHHHHHLLL11111EEEE
Query aapyspntlrsldr1tqvaerqGVVFGRLQRHVAXIVVAQFAATLTddtgap1LLVK 60
ident
Sbjct -----mkveeilekalelviPDEEEVRKGREAEELRRRLDELG-----VEYV 43
DSSP -----1111hhhhhhhh1LLHHHHHHHHHHHHHHHH-----LLEE

DSSP HHHhhhhhh111111LLEEEEL-----LLHHHHHHHHHHhh1111eeEEELLE
Query GGsslelrrgipdsrtsKDFATVAR-----RDIELIHEQLADAGetgwegftAIFTAPE 114
ident
Sbjct FV-gsyarntwkgslleIDVFLFPeefskeELRERGLEIGKAVL-----DSYEIRY 94
DSSP EE-hhh111111111EEEEEL1111hhHHHHHHHHHHH-----LLEELL

DSSP EL1111111LEEEEEEEe1leeEEEEEEEEELLL1111leeeelhhhh1111le
Query EIaapgxpvkPRRFTAKLSyrgraFATVPIEVSSVEAGnadqfdt1tsdalglvgvpaav 174
ident
Sbjct AE-----HPYVHGTVK-----GVEVDVVPCKLKE----- 119
DSSP LL-----LLEEEEL-----LEEEEEEEELLL-----

DSSP eee11hhhhhhHHHHHh111111LLLhHHhhhhhhhh11hhhhhhhhhhhh
Query avpctipwqiaKQLHAVtavleepkaNDRAhd1vd1qllleg11ldadlxptrsaciaif 234
ident
Sbjct pkniksavdrtpFHKKWL-----EGRI----- 141
DSSP 11111111hhH-----HHL-----

DSSP hhh111111111111hhH-----1111LHHH
Query earaqhpwprvat1phwplIYAGALEG-LDHL-----elarTVDA 274
ident

```











```

ident |
Sbjct aDKENARGLCIAHYYNLAparavayafhsavetqnddmayeqaar itglfhdhkfawvh 266
DSSP 1LHHHHHHHHHHHHHHLLHhhhhhhhhhhhh1111hhhhhhhhhhhh11111hhhh
DSSP -----1111
Query -----atkr 292
ident
Sbjct yacwgvrrddilrsfqskeankvnfrdac lmfwkla 302
DSSP hhh111hhhhhhhh1111hh11hhhhhhhh1111

```

No 684: Query=mol1A Sbjct=2w3cA Z-score=2.9

[back to top](#)

```

DSSP -----LLL---11L
Query -----AAPY---ssP 7
ident
Sbjct levgiqamehlihlvlqtrdsdseiigyaldtlyniisnsqfteifkqqeNVTL11s11E 60
DSSP 11111111hhhhhhhh1111hhhhhhhhhhhhhh11hhhhhhhh11hHHHHhhhhL

```

```

DSSP LLLHHHHHHHHHHHHHLL-----11hhhHHHHhHHHH-----
Query PTNLRSLRDRLTQVAERQG-----vvfgr1QRHVaXIVV----- 41
ident
Sbjct EFDHFVRWPGVKLLTSLKq1gpqvqiilvspmgvsrLMDL-LADsrevirndgv11lq 119
DSSP LLLHHHHHHHHHHHHHHhh1hhhhhhhhhh111hhhhHHHH-HHLL1hhhhhhhhhhhh

```

```

DSSP -----hhhhh1111111111eEEH-----HHHHHHHLL1111111111eEEE
Query -----aqfaat1tdtgap11LVKG-----GSSLELRRGipdsrtskdfatv 83
ident
Sbjct altrsngaiqkivafenafer11DIISeegnsggiviVEDCLILLQN----- 166
DSSP hhh111hhhhhhhh11hhhhhhHHHHh11hh11hhHHHHHHHH-----

```

```

DSSP e111hhhhhhhhhhhh1111eEEEE11leel1111111111eEEEEeelleEEEE
Query arrdieliheqladagetgwegftaiftapeeiaapgxpvkprfrftaklsyrgrafatvp 143
ident
Sbjct ----- 166
DSSP -----

```

```

DSSP eeeee1111111111eEEEE1hhhh111111eEEEE1LHHHHhHHHHHHhh111111LLL
Query ievssveagnadqfdt1tsdalglvgvpaavavpcxTIPWQiAQKLHAvtavleepkAND 203
ident
Sbjct -----11knnsnqnfkegsYIQRM-KPWFEV-----GWS 196
DSSP -----hh111hhhhhhhh11LHHHH-LHHLL-----LLL

```

```

DSSP L--LHHHHHHHHHHHHHLL-----LHHHHHHHHHHhhhhhh11111LLLLLL11h
Query R--AHDLVDLQLEGLL-----LDADLXPTRSACiaifearaqhpwPPRVATLphw 252
ident
Sbjct AqkVTNLHMLQLVRRVlvspntppgaTSSCQKAMFQCG-----11qq1CTILMAT--- 246
DSSP HhhHHHHHHHHHHHHHH11111hhHHHHHHHHHHLL-----hhhhHHHHHLL---

```

```

DSSP hhhhhhh1111111111HHHHHHHHHHHHHHHHHHLL-----
Query pliyagaleglhdlelartVDAQAQVQRFVARIDRATKR----- 292
ident
Sbjct -----gvPADILTETINTVSEVIRGCQVnqdyfasvnapsppraivv 289
DSSP -----11LHHHHHHHHHHHHHHLLHHhhhhhh11leel111eehhhh

```

```

DSSP -----
Query ----- 292
ident
Sbjct llmsmvrnerqpfvlrcavlycfqcflyknqkgqgeivstllpstidatgnsvsagql1cg 349
DSSP hhhhh111111hhhhhhhhhhhhhh111hhhhhhhh1111111111111111hhhhhhhh

```

```

DSSP -----
Query ----- 292
ident

```

DSSP -----  
 Query ----- 292  
 ident  
 Sbjct iqtrvglmlmlctwlsncpiavthflhnsanvpfltqgiaenlgeeeqlvqglcalllgi 469  
 DSSP hhhhhhhhhhhhhhhhhllllhhhhhhhhhhllllhhhhhhhhhhllllllllhhhhhhhhhhhhhhhh

DSSP -----  
 Query ----- 292  
 ident  
 Sbjct siyfndnslesymkekklqliekriegkenfielglfiskhelysrasqkpqpnfpspeym 529  
 DSSP hhhllllllllllllhhhhhhhhhhhhllhhhhhhhhhhllllllllhhhhllllllllllhhhhll

DSSP -----  
 Query ----- 292  
 ident  
 Sbjct ifdheftklvkelegvitkaiy 551  
 DSSP lllhhhhhhhhhhhhhhhhhhll

No 685: Query=mol1A Sbjct=2iicD Z-score=2.9

[back to top](#)

DSSP -----  
 Query ----- 0  
 ident  
 Sbjct daipevkaileakneeelvtftsrsaeerkerlrtqfddtglefiaflkkcikngpyed 60  
 DSSP llhhhhhhhhhhllllhhhhhhhhhhllhhhhhhhhhhhhhhhhllllhhhhhhllllllllhhhh

DSSP -----LLLL-----1llllllhhhhhhhhHHHHHLLLLHHHH  
 Query -----AAPY-----sspptnlrsldr1TQVAERQGVVFGRL 32  
 ident | |  
 Sbjct vmalgwDCNIsarvnnvikkamknvndfraihdvliatpderlklaQAYKEKTGNDLLQD 120  
 DSSP hhhhhllLLHHhhhhhhhhhhllllllllhhhhhhhhhhllllhhhhhhhhHHHHLLLLLLHHHH

DSSP HHHHHhhhhhhhhhhllllllllllleeeehhhhhhhhhllllllllllleeeel1llhhhhh  
 Query QRHVaxivvaqfaatltdtdgaplllvkggsslelrrgipdsrtskdfatvarrdielih 92  
 ident  
 Sbjct FVDQ----- 124  
 DSSP HHHH-----

DSSP hhhhhhhhhllllleeeel1lleellllllllllleeeeeeeelleeeeeeeeeellll  
 Query eqladagetgwegftaiftapeeiaapgxpvkprfrftaklsyrgrafatvpievssveag 152  
 ident  
 Sbjct ----- 124  
 DSSP -----

DSSP 1llllleeeelhhhhllllllleeeelLHHHHHHHHHHHHHLLllllllllLLHHhhHHHH  
 Query nadqfdt1tsdalglvgvpaavavpcXTIPWQIAQKLHAVTAvelepkaNDRAHD1VDLQ 212  
 ident | | |  
 Sbjct -----ipltsaasylchlairenrtprGSVASDAEVLKHNLI-----dAEPDH-EAVV 172  
 DSSP -----1llllhhhhhhhhllllllllllLHHHHHHHHHHHHHLL-----1LLLLH-HHHH

DSSP HHHHLLHHHHHHHHHHHHHHHHHh1111LL--LLL1llhhhhhhhhllllllllll  
 Query LLEGLLDADLXPTRSACIAIFEaqaqPWP--RVATlphwpliyagaleglhdhlear 270  
 ident |  
 Sbjct RLIIITSTADEYKEINHRFEVLG----KSVQeaIETR-----y 206  
 DSSP HHHHLLHHHHHHHHHHHHHHHLL----LHHhhHHHH-----1

DSSP lHHHHHHHHHHHHHHHHH-----  
 Query tvDAAAQAVQRFVARIDR----- 288  
 ident |  
 Sbjct aDKENARGLCIAHYYNLAparavayafhsavetqndmayeqaaritglfhdhkhfawvh 266  
 DSSP lHHHHHHHHHHHHHHHLLllhhhhhhhhhhhhllllllllhhhhhhhhhhhhhhllllllhhhh

Sbjct yacwgvrrddilrsrfqskeankvnfrdaclmfwkla 302  
DSSP hhh111hhhhhhhh11111hhhh11hhhhhhhh1111

No 686: Query=mol1A Sbjct=4u03A Z-score=2.8

[back to top](#)

DSSP 1111111111hhhhhhhhhhhh11LLHHHHHHHHHHHHHHHHHHH-LLLL-----  
Query aapyspntnlrslrdrltqvaerqgVVFGRlQRHVAXIVVAQFAA-TLTD----- 50  
ident  
Sbjct ----mtwnfhqyytnrndglmglv1TDEEKNNLKALRKIIRLRTRdVFEEakgiakavk 56  
DSSP ----1lee1hhhh11111hhhh11LHHHHHHHHHHHHHHHHHHHHHHHHhhhhhhhh

DSSP -----L11111EEEEHH----h  
Query -----dTGAP1LLVKGG----s 63  
ident  
Sbjct ksaltfeiiqekvsttqikhlsdseqrevakliyemdddardfLGLT-PRFWTQgsfqy 115  
DSSP h1111hhhhhhhhhh1hhhh11hhhhhhhhhhhh11hhhhhhHLLL-LEEEEE1hhhh

DSSP hhhhhh11111111LLEEEEL-----1LHHHHHHHHHHHHHHHLLLE-eeEELL  
Query slelrrgipdsrtsKDFATVAR-----rDIELIHEQLADAGETGWEGF-taIFTAP 113  
ident  
Sbjct dtlnrpfqpgqemdIDDGTYMPmpifesePKIGHSLILLVDASLKSVAENhgwKFEAK 175  
DSSP 1111111111leeEEEEEEe11111111LHHHHHHHHHHHHHHHLL11eEEEL

DSSP Ee1111111111EEEEEEe11EEEEEEEEEEELLLLLL11eeeee1hhhh11111  
Query EeiaapgxpvkpRRFTAKLSyrgRAFATVPIEVSSVEAGNADqfdlttsdalglvgvpaa 173  
ident  
Sbjct Q-----TCGRIKI---eAEKTHIDVPMYAIPKDEFQ-----kkqi 207  
DSSP L-----LLEEEEE---hHHEEEEELEEEEEHHHHH-----hhh

DSSP eeeee1hhHHHH-----hHHHHhh11111111LLLLhHHhhhhhhhh  
Query vavpcxtipWQIA-----qKLHAvtavleepkaNDRAhdldlqlle 215  
ident  
Sbjct aleanrsfyELDSenvnlalregdrkwinsdpKIVE-----dWFND----- 248  
DSSP hhh1111111LLHhhlee11111111ee11hHHHH-----hHHHH-----

DSSP hh11hhhhhhhhhhhhhhhh1111111111LLHHHHHHHHHHHLLLLL-----  
Query gl1ldadlxptrsaciaifearaqhpwprvatLPHWPLIYAGALEGLDHL----- 266  
ident  
Sbjct -----scIRIGKHLRKVCRFMKAWRdaqwdvggp 277  
DSSP -----hhHHHLLHHHHHHHHHHHHHHhh111111

DSSP ----1111LHHHHHH-----  
Query ----elarTVDAAAQ----- 277  
ident  
Sbjct ssis1maaTVNILDSvahdasdlgetmkiiaakhlpsefargvespdstdekplfppsykh 337  
DSSP 1hhhhhhHHHHHH111111hhhhhhhhhhhhhhhh111111111111111hhhh

DSSP -----hhhhhhhhhh1111  
Query -----avqrfvaridrskr 292  
ident  
Sbjct gpremdimsklerlpeilssaesadskealkkinmafgrnvtinselivlakx 390  
DSSP 1hhhhhhhhhhhhhhhh1111hhhhhhhhhh11111hhhle111

No 687: Query=mol1A Sbjct=4kf8B Z-score=2.8

[back to top](#)

DSSP 1111111111hhhhhhhhhhhh1111hhhhhhhhhhHHHLL11111111EEEE  
Query aapyspntnlrslrdrltqvaerqgvfgrlqrhvaxivvaqFAATLtdtdgap1LLVK 60  
ident  
Sbjct -----LLPKD---isq11SLVS 14  
DSSP -----LLLL---hhhhHHHH

```

Query -----gGSSELRRGipdsrtskdfatvarrdieliheqladagetgw 103
ident
Sbjct atingvdpnpskdqisyfRTLKLVLFV----- 41
DSSP hhh11111111111111hhhhHHHHHHHHHH-----

DSSP lleeeellleell11111111leeeeeeeeeleeeeeeeeeell1111LLLleeeel
Query egftaiftapeeiaapgxpvkprfktaklsyrgrafatvpievssveagnADQFdtltsd 163
ident
Sbjct -----vIrgtkhsaVTQL----- 54
DSSP -----hhh111111HHHH-----

DSSP hhhh11111leeeelLHHH-HHHHHHHHHHLLL1111LLLHHHHHHHHHHHHL----
Query alglvgvpaavavpcxTIPW-QIAQKLHAVTAVLeepkANDRAHDLDLQLEGLL---- 218
ident
Sbjct -----vI T T L D r V V A R S F R N L A A L V -----H A T T P E D L A L I T A I L Q A C I s v p 96
DSSP -----hhHHHHhLHHHHHHHHHLLL-----LLLHHHHHHHHHHHHH111h

DSSP -LHHHHHHHHHHHHHHhh1111LLL--LLL11hhhhhhhh11111111LHHHH
Query -LDADLXPTRSACIAIFearaqhpWPPR--VATLphwpliyagalegldhlelaRTVDAA 275
ident
Sbjct gIEQCQLQVLNIXSSHN-----vLQVAtsLFSW-----sdrgdPIYGEL 135
DSSP hHHHLHHHHHHHHHLL-----hHHHHhhHHHH-----11111LHHHHH

DSSP HHHHHHHHHHhHLL-----
Query AQAVQRFVARI DRAT----- 290
ident
Sbjct ALLLLELSA-LPALaeqlacdgllghltsanlagfxrannagaarcyaiwakgilpll 194
DSSP HHHHHHHHLL-LHHHHhhhhhh11hhhhhh11hhhhhh11111111hhhhhhhh11hhhh

DSSP -----
Query ----- 290
ident
Sbjct lnlgaltiapevafvlnqfpnlrrssvdralvalsevhsllltrvlaakavgllegir 254
DSSP hhhh11111hhhhhhhh11hhhh11111111hhhhhhhhhhhhhhhh11hhhhhhhh

DSSP --11
Query --kr 292
ident
Sbjct dv1a 258
DSSP hhh1

```

No 688: Query=mol1A Sbjct=1n00A Z-score=2.8

[back to top](#)

```

DSSP -----LLLLLL-----111hhHHHHhhhhhh11
Query -----AAPYSSP-----ptnlrSLRDrltqaerqg 26
ident
Sbjct hhhatlvtvPTTVPSVsedceqlrkafsgwtneqliidilghrnaeQRNL----- 50
DSSP 11111111LLLLLHhhhhhhhhhh11111111hhhhhhhh1111hhHHHH-----

DSSP 11hhhhhhhhhhhhhhhh11111111leeeehhhhhhh11111111leeeell
Query vvfgrlqrhvaxivvaqfaatltdtgaplllvkkgsslelrrgipdsrtskdfatvarr 86
ident
Sbjct ----- 50
DSSP -----

DSSP 1hhhhhhhhhhhh111leeeelllee11111111leeeeeEELLE-----
Query dieliheqladagetgwegftaiftapeeiaapgxpvkprfktaklsYRGR----- 137
ident
Sbjct -----irktyaetygeDLLKAldkelsndf 75
DSSP -----hhhhhhhh11LHHHHHHhh11hh

DSSP -----eeeeeeee
Query -----afatpievs 147

```



ident  
Sbjct mvqnksidelhtrtffdtlynlkkifksditinkgflnwlaqqckarqsnldnglqerdt 256  
DSSP h1111111hhhhhhhhhhhhhhhhhhhh111111hhhhhhhhhhhhhhhh11111111

DSSP -----  
Query ----- 292  
ident  
Sbjct eqdsfdkklidsrhli f 273  
DSSP hhhhhhhhhhhhhhh11

No 690: Query=mol1A Sbjct=3ovbB Z-score=2.8

[back to top](#)

DSSP 111111111hhhhhhhhhhhhhh1LLLHHHHHHHHHHHHHHHHHHHHLL1111111EEEE  
Query aapyspntnlrslrdrltqvaerqGVVFGRLQRHVAXIVVAQFAATLTddtgap1LLVK 60  
ident  
Sbjct -----mkveeilekalelviPDEEEVRKGREAEELRRRLDELG-----VEYV 43  
DSSP -----11hhhhhhhh1hhhh1LLHHHHHHHHHHHHHHHHHHHHLL-----LLEE

DSSP HHHhhhhhh1111111LLEEEEL-----LLHHHHHHHHHHHHhh111leeEELLE  
Query GGsslelrrgipdsrtsKDFATVAR-----RDIELIHEQLADAGetgwegftAIFTAPE 114  
ident  
Sbjct FV-gsyarntwlgksleIDVFLLFPeefskeELRERGLEIGKAVL-----DSYEIRY 94  
DSSP EE-hhhhh1111111eEEEEEL1111hhHHHHHHHHHHHHLL-----LEEELL

DSSP e1111111LLEEEEEEEe1leeEEEEEEEEELLLL1111eeee1hhhh11111e  
Query eiaapgxpvKPRRFTAKLSyrgraFATVPIEVSSVEAGNadqfdt1tsdalglvgvpaav 174  
ident  
Sbjct -----aEHPYVHGvvk-----GVEVDVVPCKLKEP----- 120  
DSSP -----1LLEEEEL-----LEEEEEEEELLLL-----

DSSP eeee1hhhhhhHHHHHHh1111111LLLhHHHHHHHHHHh11hhhhhhhhhhhhhh  
Query avpcxtipwqiaQKLHAVtavleepkaNDRAhd1vd1qlleg11ldadlxptrsaciaif 234  
ident  
Sbjct -kniksavdrtpFHHKWL-----EGRI----- 141  
DSSP -11111111hhHHHHHH-----HHHL-----

DSSP hhh1111111111111hhHHHHHLL-LLLL-----111LHHH  
Query earaqhpwpprvat1phwplIYAGALEG-LDHL-----elarTVDA 274  
ident  
Sbjct -----kGKENEVRL1KGFLkangiyaeykvrfgsylvcellIVFY 182  
DSSP -----1LHHHHHHHHHHHHhh1111111111111111hhhhhhHHHH

DSSP H-----hhHHHH-----  
Query A-----aqAVQRF----- 282  
ident  
Sbjct GsfletvknarrwtrrtviDVAKGevrkgeeffvdpvdekrnvaanlsldnlarfvhlc 242  
DSSP L1hhhhhhhh111111eeELLLLeee1111eeee111111hhhhhhhhhh

DSSP -----  
Query ----- 282  
ident  
Sbjct refmeapslgffkpkhpleieperlrkiveergtavfavkfrkpdvddnlypqlerasr 302  
DSSP hhhhh111hhhh1111111111hhhhhhhhhh1leeeeeee11111hhhhhhhhhh

DSSP -----  
Query ----- 282  
ident  
Sbjct kifeflrenfmplrsafkaseefcyllfecqikeisrvfrmgpqedernvkkflsrn 362  
DSSP hhhhhhh1111111111111111111111111111111111111111111111111

DSSP -----  
Query ----- 282  
ident



DSSP -----hshhhhhhlllll  
Query -----varidratkr 292  
ident  
Sbjct epvtaelcemmgvkd 437  
DSSP lllhshhhhhhhhlllll

No 691: Query=mollA Sbjct=2b51A Z-score=2.8

[back to top](#)

DSSP lllllllllllhshhhhhhhhhhhhhllllLHHHHHHHHHHHHHHHHHHHHLLLLllllllLLEEEE  
Query aapyssptnlrslrdrltqvaerqgVVFGRQLQRHVAXIVVVAQFAATLTdtdtgaPllLVK 60  
ident  
Sbjct ---npspdhyavwgkaimaennrrvgPEHMFRTAIRAQQQLQGLADKWT-----PDAKVY 52  
DSSP ---llhshhhhhhhhhhhhhhhhhhhllLHHHHHHHHHHHHHHHHHHHHLL-----LLEEEE

DSSP HHHhhhhhhllllllllLLEEEEL-----LHSHHHHHHHHHHHHHHHLL-leeEELL  
Query GGsslelrrgipdsrtsKDFATVAR-----rDIELIHEQLADAGETGWE-gftaIFTAP 113  
ident  
Sbjct CC-gsmvtygqmergsdLDLACMFDdpypsheVQAKRTDKLRTVIKRYVPhylrnNLLGL 111  
DSSP EE-llhshhhllllllllLLEEEELllllllhshhhhhhhhhhhhhllllLHHHHHHHHHHHHHHLLhshhhLLEEL

DSSP EELllllllLLEEEEL-----  
Query EEIaapgxpvKPRRF-TAK----- 131  
ident  
Sbjct TEA-----RTPVVKLRfandekvararytpleeedrkatalldvrnqcvgdndvey 164  
DSSP LLL-----LLEEEELllllhshhhhhhhllllhshhhhhleeeeeellllllhshhhhh

DSSP -----ee  
Query -----ls 133  
ident  
Sbjct iaekmgrdnvegirvdrtytycraiaiqcstkeqmieaigffpdgkimtrgmredytrdvl 224  
DSSP hshhhhhheeeeeellllleeeeeellshhhhhhhllllllllllhshhhheeeeeel

DSSP eLLEE---EEEEEEELllllllllleeeellshhhllllllleeeellshhhhhHHH  
Query yGRGA---FATVPIEVSSveagnadqfdtlttsdalglvgpaavavpcxtipwqiaQKL 189  
ident  
Sbjct dVRFVpemfMYRWDISFV-----gygvKNS 249  
DSSP lllllhshhhLLEEEEL-----lshhhHHH

DSSP HHHhllllllllllLHshhhhhhhhhhhllshhhhhhhhhhhhhhhllllllllll  
Query HAVtavleepkanDRAHdldlqlllegllldadlxptrysaciaifearaqhpwpprvatl 249  
ident  
Sbjct YLI-----RHYL----- 256  
DSSP HHH-----HHHH-----

DSSP lLHSHHHHHHHHLL-LLL-----llllLHHHHHH-----  
Query pHWPLiYAGALEG-LDHL-----elarTVDAAAQ----- 277  
ident  
Sbjct hNGPVaARHTAMAvKAWGkatinvgagsgamltsyavtvmFIYLLVtrqvlwvdpwslph 316  
DSSP hLllLlLHHHHHHHHHHhhlllllllllllllllllllshhhhhhhHHHHHHllllllllhshhlll

DSSP -----hHHHH-hshhhHLLL-  
Query -----aVQRF-varidRATKR- 292  
ident  
Sbjct pahlprypdfsplydcptelgrllhgffifyahhfdyerevvsLNRNrrsyrS-DIGWnf 376  
DSSP hhhllllllllllllllllhshhhhhhhhhhhhhhhhhhhllllllleeeLllllleehhHLLLL

DSSP -----  
Query ----- 292  
ident  
Sbjct pqnkkgtfsynfciedpyedvgtgglnlvrhlhpakfqlvkqeflraaqcmerflptnap 436  
DSSP hhhheellee111leellllllllllllllllllllllllhshhhhhhhhhhhhhhhhhhhllllllll



```

Query  GGsslelrrgipdsrtsKDFATVAR-----RDIELIHEQLADAGetgwegftAIFTAPE  114
ident
Sbjct  FV-gsyarntwkgsleIDVFLLFPeefskeELRERGLEIGKAVL-----DSYEIRY    94
DSSP   EE-hhhhh11111111eEEEEEEEL1111hhHHHHHHHHHHHHHL-----LEEELL

DSSP   e1111111LLEEEREEEEEe1leeEEEEEREEELL1111leeeelhhhh1111le
Query  eiaapgxpvKPRRFTAKLSyrgreFATVPIEVSSVEAGNadqfdtltsdalglvgvpaav  174
ident
Sbjct  -----aEHPYVHGIVVK-----GVEVDVVPKYKLEP-----              120
DSSP   -----1LLLLEEEEEL-----LEEEEEEREEELL1L-----

DSSP   eeee1hhhhhhHHHHHH11111111LLLhhhhhhhhhhhh1hhhhhhhhhhhhhhhh
Query  avpctipwqiaQKLHAVtavleepkaNDRAhdldlqlleg11ldadlxptrsaciaif  234
ident
Sbjct  -kniksavdrtpFHKKWL-----EGRI-----                    141
DSSP   -11111111hhHHHHHH-----HLLL-----

DSSP   hhh11111111111111hhHHHHHLL-LLLL-----1111LHHH
Query  earaqhpwpprvatlphwplIYAGALEG-LDHL-----elarTVDA  274
ident
Sbjct  -----kGKENEVRLIKGFLkangiyyaeykvrgfsgylcellIVFY  182
DSSP   -----1LLHHHHHHhHHHHhh1111111111111111hhhhhhHHHH

DSSP   H-----hHHHHH-----
Query  A-----aqAVQRF-----  282
ident
Sbjct  GsfletvknarrwtrrtviDVAKGevrkgeeffvvdvdekrnvaanlsldnlarfvhlc  242
DSSP   Llhhhhhhhh111111leeeEHHHLeeee111leeee1111111111hhhhhhhhhh

DSSP   -----
Query  -----  282
ident
Sbjct  refmeapslgffkpkhpleieperlrkiveergtavfavkrkpdiddnlypqlerasr  302
DSSP   hhhhh111hhhh11le1111hhhhhhhhhh1leeeeeee111111hhhhhhhhhhhhhh

DSSP   -----
Query  -----  282
ident
Sbjct  kifeflerenfmlprlsafkaseefcyllfecqikeisrvfrrmgpqedernvkkflsrn  362
DSSP   hhhhhhhhh111leeeeeee11leeeeeee111111leeeeeee111hhhhhhhhhh11

DSSP   -----
Query  -----  282
ident
Sbjct  rafrpfiengrwwafemrkfttpeegvrsyasthwtlkgknvgesireyfeisgek1fk  422
DSSP   1111leee1leeeeeee111111hhhhhhhhhh1hhhh1hhhhhhhhhh1leeehhhhhh

DSSP   -----hhhhhh1111
Query  -----varidratkr  292
ident
Sbjct  epvtaelcemmgvkdcccq  441
DSSP   111hhhhhhhh1111leel

```

No 694: Query=mol1A Sbjct=3evhA Z-score=2.7

[back to top](#)

```

DSSP   1111111111hhhhhhhhhhhhhhhh1111hhhhhhhhhhhhhhhh11111111leeee
Query  aapyspntlrsldrftqvaerqgvfgrlqrvaxivvaqfaatltddtgap111vk  60
ident
Sbjct  -----gshpfdqavvkdptasyvdkarrtflqsgqlddrllkaalpkeydct  47
DSSP   -----111111111111111111hhhhhhhhhh1111hhhhhh111111hh

DSSP   hHHHHhhhh1111111111leeeeELLHHHHHHhhhhhhhh1111leeeel1lee1111
Query  gSSLeIrrgipdsrtskdfatvARRDIELIHeqladagetgwegftaiftapeeiaapg  120

```

DSSP 11111eEEEEEEe11eEEEEEEEEe11111LLLLeeee1hhhh11111eEEEELL 180  
Query xpvkprrrftaklsyrgrafatvpievssveagnADQFdtltsdalglvgvpaavavpCXT  
ident  
Sbjct -----pvnpdYEPV-----VTL 83  
DSSP -----11111HHHH-----HHH

DSSP HhHHHHHHHHHHHLLL111LLL--LHHHHHHHHHHHH--LLHH-----hhHHHHHHHHH 231  
Query IpWQIAQKLHAVTAVLEepKAND--RAHDLVDLQLEGL--LLDA-----dIXPTRSACI  
ident  
Sbjct Y-RDFEKISATLGNLYV-aTGKPVyATCLLNMLDKWAKAdALLNydpsqswYQVEWSAA 141  
DSSP H-HHHHHHHHHHHHHHHH-hHLLHhhHHHHHHHHHHHHHL1LLL11111hhHHHHHHHHH

DSSP hhhhhh11111LLL--LHLLHhHHHHHHHh1111111111HHHHHHHHHHHHHHHHH 288  
Query aifearaqhpwPPRV---ATLPHWpIiyagaleglhdlleartVDAAAQAVQRFVARIDR  
ident  
Sbjct -----taAFALStmMAEPNV-----DTAQRERVVKWLNRVAR 173  
DSSP -----hhHHHHh1LLL111-----LHHHHHHHHHHHHHHHHH

DSSP -LLL----- 292  
Query -ATKR-----  
ident  
Sbjct hQTSFpggdtscennasywrgqeatiigviskddelfrwwglgryvqamglinedgsfvhe 233  
DSSP hHLLL1111111111hhhhhhhhhhhhhhhhhh11hhhhhhhhhhhhhhhh1111111111h

DSSP ----- 292  
Query -----  
ident  
Sbjct mtrheqslhyqnyamlpltmiaetasrqgidlyaykengrdihsarkfvfaavknpdlik 293  
DSSP hhlhhhhhhhhhhhhhhhhhhhhhhhhhh11111hh111111hhhhhhhhhhhhhh11hhhh

DSSP ----- 292  
Query -----  
ident  
Sbjct kyasepqdtrafkpgrgdlnwieyqrarfgfadelgfmtvpifdprtggSATllaykpgg 353  
DSSP 1111111111111111hhhhhhhhhhhhhh111111111111eehhhleehhh111111

No 695: Query=mol1A Sbjct=5hc9A Z-score=2.6

[back to top](#)

DSSP 1111111111hhhhhhhhhhhhhh1111hHHHHhhHHHHHHHHHHHLL11111LLEEEE 60  
Query aapyspntnlrslrdrltqvaerqgvfGRLQrhVAXIVVAQFAATLtddtgAPLLLVK  
ident  
Sbjct -----mqifrdvskllvERVD--PKILNLFRLGKF--gdEVNMPVY 38  
DSSP -----111ee1hhhhhHLL--HHHHHHHHHHHHH--hhHLLLEE

DSSP hhHHHHHHHLLL--1111LLEEEEE11LHHHHHHHHHHHHh1111eEEEELLEEL11 118  
Query ggSSELELRGIPD--srtsKDFATVArrDIELIHEQLADAGetgwegfTAIFTAPEEIaa  
ident  
Sbjct --VVGGFVRDLLgiknldIDIVVEG--NALEFAEYAKRFL-----PGKLVKHDKF-- 85  
DSSP --EELHHHHHHHH111111EEEEEL--LHHHHHHHHHHH-----LEEEEEELL--

DSSP 1111111111111111eEEEEEEe11eEEEEEEEE-----1LLL1111eEEE1hhhh1111 172  
Query pgxpvkprRRTAKLSyrgrAFATVPIEVSS-----vEAGNadqfdltsdalglvgvpa  
ident  
Sbjct -----MTASLFLK-----GGLRIDIATARleyespAKLP----- 115  
DSSP -----LEEEEEEL-----LLEEEEEELL1111111LLL-----

DSSP 1eeeee11HHHHHhHHHHhHHh1111111111LHH-----hhHHHHHh 216  
Query avavpcxtIPWQIAQKLhavtavlepkandRAH-----lvdLQLLeg  
ident  
Sbjct -----dVEMS-TIKK-----dlyrRDFTinamaiklnpkdfgllidfFGGY-- 155  
DSSP -----1HHHH-HHHH-----hh1LLLHhh11ee111111ee111LHH--

```

ident
Sbjct -----rdlkegvirvlHTLSFVDDprrlrairfeqRDFRIEe 194
DSSP -----h h h h l l e e l l l l l L H H H H H l l l h h h h h h h h h h L L L L E E L h

DSSP -----
Query ----- 271
ident
Sbjct tterllkqaveegylerttgprrlrqelekileeknplksirрмаqfdvikhlfpktyyp 254
DSSP h h h h h h h h h h h l l h h h h l l h h h h h h h h h h l l l l h h h h h h h h h h l l h h h h h l l l l l l h

DSSP -----
Query ----- 271
ident
Sbjct smdekmenlfrnipwveenfgvdrfyavlhvlfefyddeskevrdryslrrnlineir 314
DSSP h h h h h h h h h h h h h h h l l l l l h h h h h h h h h h l l l l l h h h h h h h h h h l l l l l h h h h h h

DSSP -----
Query ----- 271
ident
Sbjct hveksapallemlservpasfvplvkgvsnetichflaylsgekeglfksyllkikntk 374
DSSP h h h h h h h h h h h h h h h l l l l h h h h h h h h h h l l l l h h h h h h h h h h h h h h h h l l l l

DSSP -----h h h h h h h h h h h h h h h l l l l
Query -----vdaaaqavqrfvaridrskr 292
ident
Sbjct lekingeylirkgitsgkii gevleki lmkklgdgtrdeeeileevlasle 425
DSSP l l l l h h h h h h h l l l l l l h h h h h h h h h h h h h h l l l l l h h h h h h h h h h h h l

```

No 696: Query=mol1A Sbjct=3gq2A Z-score=2.6

[back to top](#)

```

DSSP l l l l l l l l l l h h h h h h h h h h h h h h h l l l l H H H H H H H H H H H H H H H -----h h H H H L L l l l l l
Query aapyspntnlrslrdrltqvaerqgvvFGRLQRHVAXIVV-----aqFAATLtddtg 53
ident
Sbjct -----h t e a e t i q k l c d r v a s s T L L D D R R N A V R A L k s l s k y r l E V G I Q ----- 44
DSSP -----l l l l h h h h h h h h h h h h l l L H H H H H H H H H H H h h h l l l l l h h H H H H H -----

DSSP l l l E E E E -----H H H H H H H H H H h l l l l l l l l l e e e e e l l l h h h h h h h h h h h h h h h h
Query aplLLVK-----GGSLELRrgipdsrtskdfatvarrdieliheqladaget 101
ident
Sbjct -amEHLIhvlqtdrdsseiIGYALDTL----- 70
DSSP -h h H H H H h h h h l l l l l l h h h H H H H H H H H H H -----

DSSP l l l l e e e e e l l l e e l l l l l l l l l l l l e e e e e e e e e e l l l l l l l l l l e e e e
Query gwegftaiftapeeiaapgxpvkprftaklsyrgrafatvpievssveagnADQFdtlt 161
ident
Sbjct -----y n i i s n d e e e e d l g s q f t e i F I K Q ----- 94
DSSP -----h h h h l l l l l l l l h h h h h h h h H L L -----

DSSP e l h h h h l l l l l l e e e e e l L H H H H H H H H H H h h h h l l l l l l l l l L H H H H H H H H H H h L L H H
Query sdalglvgvpaavavpcxTIPWQIAQKLhavlavlepkandRAHDLDVLDLLEgLLLDA 221
ident
Sbjct -----q E N V T L L L S L L -----e e F D F H V R W P G V K L L t S L L K Q 126
DSSP -----h h H H H L H H H H L -----l l l L H H H H H H H H H H h H H H H H H

DSSP H H H H H H H H H H H H h h l l l L L L L -----L L L L l l l h h h h h h h h h h l l l l l l l l l L H H H H H H H H H
Query DLXPTRSACIAIFEaraghPWPP--RVATlphwpliyagalegl dhlelarTVDAAAQAV 279
ident
Sbjct LGPQVQIILVSPM----GVSRLmDLLA-----dSREVIRNDG 160
DSSP L H H H H H H H H H H L L L -----H H H H h h H H H H -----l l L H H H H H H H H H

DSSP H H H H H H H H H H L L L L -----
Query QRFVARIDRATKR----- 292
ident

```

DSSP -----  
Query ----- 292  
ident  
Sbjct qnffkegsyiqrmkpwfevgdensgwsaqvtnlhlmqlvrvlvspnppgatsscqa 280  
DSSP hhhhhhh111hhhh1hhhh111111111hhhhhhhhhhhhhhhhhhhh11111hhhhhhhhhh

DSSP -----  
Query ----- 292  
ident  
Sbjct mfcqgllqqlctilmatgvpadiltetintvsevircqvndyfasvnapsnppraiv 340  
DSSP hhh11hhhhhhhhhh11111hhhhhhhhhhhhhhhh111hhhhhhhhhh111111111hhhh

DSSP -----  
Query ----- 292  
ident  
Sbjct vllmsmvnerqpfvlrcavlycfqcflyknqkgqgevstllpstdatgntvsagqlc 400  
DSSP hhhhhhh11111hhhhhhhhhhhhhhhh111hhhhhhhhhh1111111111hhhhhh

DSSP -----  
Query ----- 292  
ident  
Sbjct gglfstdslsnwcaavalahalqenatqkeqllrvqlatsignppvsl1lqcni1sqgs 460  
DSSP hhhhh111hhhhhhhhhhhhhhhh111hhhhhhhh11leell111111eehhhhhhhhhh111

DSSP -----  
Query ----- 292  
ident  
Sbjct kiqtrvglmllctwlsncpiavthflhnsanvpfltgqiaenlgeeeqlvqglcallg 520  
DSSP 1hhhhhhhhhhhhhhhh111hhhhhhhhhh111hhhhhhhhhh1111hhhhhhhhhhhhhh

DSSP -----  
Query ----- 292  
ident  
Sbjct isiyfndnsletymkeklkqliekrigkenfielgfishelysrasqkppnfpespey 580  
DSSP hhhh11111hhhh1hhhhhhhhhhhh11hhhhhhhhhhhhhh111hhhh111111111hhhh

DSSP -----  
Query ----- 292  
ident  
Sbjct mifdheftklvkelegvitkaiyksseedkkee 614  
DSSP 1111hhhhhhhhhhhhhhhhhh1111hhhhhh1

No 697: Query=mol1A Sbjct=3hm0A Z-score=2.6

[back to top](#)

DSSP 111111111hhhhhhhhHHHHHh111hhhhHHHHhHHHHHHHHH11111LLLLeeee 60  
Query aapysspptnlrslrdrLTQV AerqgvfgrLQRHVAXIVVAQFAAT1tddtGAPL1lvk  
ident |  
Sbjct ---nafhdfqarvyvadTDFSG-----vvYHAR-YLEFFERGRSEflrdtGFNN---- 45  
DSSP ---11leeeeee1hhhhLLLLL-----1LLLH-HHHHHHHHHHHhh1LLLH----

DSSP hhhhhhhhh111111111eEEEE111hhhhhhhhhhhh11LLEEEELLEELL111 120  
Query ggsslelrrgipdsrskdfATVArrdieliheqladagetgwEGFTAIFTAPEEIAapg  
ident |  
Sbjct -----tllasgvegeklffVVRH-----meinfoqsraqidNLLTIKTRISRLQG--- 89  
DSSP -----hhhhhh11111eeeeeEEEEE-----eeeeell11111LLEEEEEEEEEELL---

DSSP 111LLEEEEEEEELLEEEEEEEEEELL11111leeeehhhhh1111leeeell 180  
Query xpvKPRRFTAKLSYRGRAFATVPIEVSSVEAGNadqfdtlttsdalglvgpaavavpext  
ident | |  
Sbjct ---ARFFMEQYILHGESMLVTAKVEIALINEEG----- 119  
DSSP ---LEEEEEEEEEELLEEEEEEEEEELL-----



```

DSSP -----leeeehhhhHHHHhllllllllleeeelllhhhhhhhhhhHHHHLLL---
Query -----lllvkkgssLELRgipdsrtskdfatvarrdieliheqladAGETGWE--- 104
ident
Sbjct edvlsaampdvfahfkDFTA-----tfgpldslntrlflqgpKIAEEFEvel 559
DSSP hhhhhhhhllhhhhhhhHHHH-----hllllllllhhhhhhlllllLEEEeel

```

```

DSSP -----LEEE-EELLEELllllllllllEEEEEEEEELLEeEEEEEE---EELllllll
Query -----GFTA-IFTAPEEIIaapgxpvkRRFTAKLSYRGRAFATVPIE---VSSVeagna 154
ident
Sbjct ergktlHIKAIAVSDLNRA-----GQRQVFFELNGQL-RSILVkdTqAMKE----- 604
DSSP lllleEEEEeEEEEELL-----LEEEEEELLLLE-EEEEEEllhHLL-----

```

```

DSSP llleeeeehhhhhllllleeeelllhhhhhhhhhhhhllllllllllllhhhhhhhhh
Query dqfdtlttsdalglvgvpaavavpctxtipwqiaqklhavlavlepkandrahdldvlqll 214
ident
Sbjct ----- 604
DSSP -----

```

```

DSSP hhhllhhhhhhhhhhhhhhhhhhllllllllllllllllhhhhhhhhhhllllllllllhh
Query egllldadlxptrsaciaifearaqhPWPPRVatlphwpliyagalegldhlelartvda 274
ident
Sbjct -----KALKDV----- 610
DSSP -----LLLLL-----

```

```

DSSP hhhhhhhhhhhHLLL-----
Query aaqavqrfvariDRATKR----- 292
ident
Sbjct -----kgqigAPMPGKvidikvvagakvakgplcvsamkmetvvtspmegtvrkvh 663
DSSP -----llleLLEEeeeellllllllllllleeeellleeeellllllllllllll

```

```

DSSP -----
Query ----- 292
ident
Sbjct vtkdmtlegddlileie 680
DSSP llleeeellleeeelll

```

No 699: Query=mol1A Sbjct=2pb1A Z-score=2.6

[back to top](#)

```

DSSP lllllllllllhhhhhhhhhhhhhhllllllhhhhhhhhhhhhhhhhllllllllleee
Query aapyspntnrslrdrltqvaerqgvfgrlqrvhaxivvaqfaatltddTGAPIllvk 60
ident
Sbjct -----gQQYR----- 5
DSSP -----lLLL-----

```

```

DSSP hhhhhhhhhllllllllleeeelllhhhHHHHHHH-----hhhhllleeeellle
Query ggsslelrrgipdsrtskdfatvarrdieliHEQLAD-----agetgewgftaiftape 114
ident
Sbjct -----prmafLQKIEALvkdmpetgvrmhnqrvtvs 40
DSSP -----llllhHHHHHHhhhhllllllllllllllllllllllllllllll

```

```

DSSP ellllllllleeeeeeeLLEEE-----eEEEE-----EE
Query eiaapgxvkrprftaklsyRGAFA-----tVPIE-----VS 147
ident
Sbjct phamtggdvlqwitrwlisNLEAQNlgnfiVKYGiypdqpknilkpdsslyrfqTP 100
DSSP llllehhhhhhhhhhllllHHHHHHhhhhHHLLleeeellllllllllllleeeellLH

```

```

DSSP ELllllllleeeellhhhhllllleEEELLHHHHHHHHHHHHLLllllllllLH
Query SVeagnadqfdtlttsdalglvgvpaavAVPCXTIPWQTAQKLHAVTAVlepkandRAHD 207
ident
Sbjct YF-----wptQQWPAEDTDYAIIYLAKRNlK-----kgleEYE 134
DSSP HH-----llllllllHHHHHHHHHHHHLL-----llllLHH

```

```

DSSP HHHHHHHHHLLHhHHHHHHHHHHHHHHHLL-----llllllllllllhhhhhhHHLL--

```





```

Query ----- 288
ident
Sbjct eyallslvqaerddipilqlkaipdkgvnsiinhelaeadakdlyasgagrvtserri 233
DSSP hhhhhhhhh1111111hhhhhh1hhhh1hhhh11hhhhhhhhhhhhhh1111111111hh

DSSP -----
Query ----- 288
ident
Sbjct rvicnrtpyqlyltseiyfkygkttllehiesetsgdyrkllvavlryaidrpsliaewl 293
DSSP hhhh111hhhhhhhhhhhhhh111hhhhhhhh11hhhhhhhhhhhhhhhhhhhhhhhhhh

DSSP -----
Query ----- 288
ident
Sbjct hdsma glgkdyalmrllitrseidlqdimdayesiygkllnavkddtsgdyrrtlcvl 353
DSSP hhh1111hh111hhhhhhhhhh111hhhhhhhhhhhh111hhhhhhhh11hhhhhhhhhh

DSSP ---1111
Query ---atkr 292
ident
Sbjct mgeiynq 360
DSSP 1111111

```

No 701: Query=mol1A Sbjct=3n0fA Z-score=2.6

[back to top](#)

```

DSSP -----11111111LHHHHhhhhhhhhhh1111hhhhhhhhhhhhhhhh11111111
Query -----aapysspptNLRSLrdrltqvaerqgvvfgrlqrhvaxivvaqfaatltddtg 53
ident
Sbjct sadyepnswdydfllsSIEVY----- 21
DSSP 1111111111hhhh1111LHHH-----

DSSP 111eeehhhhhhhhh1111111111eeeee111hhhhhhhhhhhhhh11111111
Query ap1111vkgsslelrrgipdsrtdfatvarrdieliheqladagetgwegftaiftap 113
ident
Sbjct -----kdkakkleavrreinn 38
DSSP -----hhhhhhhhhhhhhh1

DSSP EELL-----LLLL1111eeeeeeeeeelleeeeeEEEe11
Query EEIA-----APGXpvkprfktaklsyrgrafatvpIEVSsve 150
ident |
Sbjct EKAefl111elidnvqrlglgyrfesDIRRA-----ldrfvSSGG--- 78
DSSP LLLLhhhhhhhhhhhh111hh11hhH-----hhhhhHLH---

DSSP 111111111111111111111111111111111111111111111111111111111111
Query agnadqf dltltsdalgvgvpaavavpcxtipwQIAQKLHAVTA vleepkANDRAhdLVD 210
ident
Sbjct -----fdgvtkSLHATALSFRL--lrqHGFEVS--QEA 108
DSSP -----hhhh1111LHHHHHHHHHH--hh1111L---HH

DSSP HHHH---HLLHhHHHHHhHHHHhhhhhh1111111111111111111111111111
Query LQLE---GLLDaDLXPtRSACIaifearaqhpwPRVATlphwpliyagaleghl 266
ident |
Sbjct FSGFKdqngNLEN-LKED-TKAIL-----slyEASFL----- 139
DSSP HHHHL1111111111LHH-HHH-HHHH-----hhHHHLL-----

DSSP 1111LHHhHHHHHHHHHHHHHLL-----
Query elARTVdaAAQAVQRFRVARIDRAT----- 290
ident |
Sbjct -a1EGEN-ILDEARVFAISHLKELseekigkelaeqvnhalelphrtrqrleavwsiea 197
DSSP -1111LH-HHHHHHHHHHHHHHHH111hh11hhhhhhhhhhhh1111111hhhhhhhhhh

DSSP -----
Query ----- 290

```

```

DSSP -----
Query ----- 290
ident
Sbjct vgvafepqysdcnrvakmfsfvtiiddiydvgtldelelftdaverwvndainldpdy 317
DSSP hhhllllhhhhhhhhhhhhhhhhhhhhhhllllllhhhhhhhhhhhhhhhhhhhhllhh

DSSP -----
Query ----- 290
ident
Sbjct mklcflalyntineiaaydnldkkgenilpyltkawadlcnafllqakwlynkstptfddy 377
DSSP hhhhhhhhhhhhhhhhhhhhhhhllllllhhhhhhhhhhhhhhhhhhhhhhhhllllllhhhh

DSSP -----
Query ----- 290
ident
Sbjct fgnawksssgplqlifayfavvqnikkeeienlqkyhdiisrpshifrlcndlasasaei 437
DSSP hhhhhhhllhhhhhhhhhhhhhhllllllhhhhhhhhllllhhhhhhhhhhhhhhhhhh

DSSP -----
Query ----- 290
ident
Sbjct argetansvscymrtkgiseelatesvmlidwtwkkmnkeklggsllfakpfvetainla 497
DSSP lllllllhhhhhhhhhhllllllhhhhhhhhhhhhhhhhhhhhhhllllllhhhhhhhhhh

DSSP -----1l
Query -----kr 292
ident
Sbjct rqshctyhngtspdeltrkrvlsvitelipfer 531
DSSP hhhhhllllllllhhhhhhhhhhhhhhllllllllll

```

No 702: Query=mol1A Sbjct=3p3qB Z-score=2.6

[back to top](#)

```

DSSP lllllllllhhhhhhhhhhhhhhllllllhhhhhhhhhhhhhhhhhhllllllllleeee 60
Query aapyspptnlrslrdrltqvaerqgvfgrlqrhvaxivvaqfaatltddtgaplllvk
ident
Sbjct ----- 0
DSSP -----

DSSP hhhhhhhhhllllllllllleeeeeellllhhhhhhhhhhhhhhllllleeeeeeellellll 120
Query ggsslelrrgipdsrtskdfatvarrdieliheqladagetgwegftaiftapeeiaapg
ident
Sbjct ----- 0
DSSP -----

DSSP lllllleeeeeeeelleeeeeeeeeellllllllleeeellhllllllleeeellL 180
Query xpvkprrfataklsyrgrafatvpievssveagnadqf dtltsdalglvgvpaavavpcxT
ident
Sbjct -----xlcdslptasR 11
DSSP -----llllllleehH

DSSP HHHHHHHHHHHHlllllllllllHHHHHHHHHHHHLLHHhhhhhhhhhhhhhhhhlll 240
Query IPWQIAQKLHAVTavlepkandrahDLVDLQLEGLLLDadlxptrsaciaifearaqh
ident | |
Sbjct TAAAILNLAQSED-----vTAEALAQLIQTDPA----- 39
DSSP HHHHHHHHHHLL-----LLHHHHHHHHLLHH-----

DSSP lllllllllllhhhhhhhhhhllLLLL--LLLLLhHHHHHHHHHHHHHH--LLLL----- 292
Query pwpprvatlphwplyagaleGLDHL--ELARTvDAAAQAVQRFVARIDR-ATKR-----
ident | |
Sbjct ----ltgrilrfanapaqgtrRPVASviDAIDL-VGLPAVRQFALSLSLIdAHREgrcea 94
DSSP ----hhhhhhhhhhllllllllllLhHHHHH-HLHHHHHHHHHHHHHHHIEELLllllll

```













```

ident |
Sbjct YGAl dsrvralvFSVRcwarahsltssgawitnfsltxXVIFFLQRRSds1ktladaesq 295
DSSP HHL11hhhhhhhhHHHHhhhhhh11111111111hhhhhhHHHHHHHLL111hhhh11111

DSSP -----hhhhhh1111
Query -----varidratkr 292
ident
Sbjct ntetlellllkeffeyfgnfxxxxxxxxxsqsqlqkfvdlaresawilqqepwglvsl1l 355
DSSP 1111hhhhhhhhhhhhhh11111111111hhhhhhhhhhhhhhhhhh111111hhhh1

```

No 709: Query=mol1A Sbjct=1hm6A Z-score=2.5

[back to top](#)

```

DSSP 1111111111hhhhhhhhhhhhhh1111hhhhhhhhhhhhhhhhhh11111111LLEE--
Query aapyspntnlrslrdrltqvaerqgvfgrlqrhvaxivvaqfaatltddtgaPLLL-- 58
ident
Sbjct -----amvseFLKQaw 11
DSSP -----lhhhhHHHHhh

```

```

DSSP -----
Query ----- 58
ident
Sbjct fidneeeyiktvkgskggpgsavspyptfnpsdvealhkaitykgydeatiiieiltkr 71
DSSP hhhhh1hhhhhhhhhhhh111111111111hhhhhhhhhhhh111111hhhhhhhhhh1

```

```

DSSP -----eeh
Query -----vkg 61
ident
Sbjct tnaqrqikaaylqekgkpldealkaltghleevalallktpaqfdadelraamkg1gt 131
DSSP 1hhhhhhhhhhhhhh1111hhhhhhhh11hhhhhhhhhh11hhhhhhhhhhhh11111

```

```

DSSP HHHHHHHHL-----
Query GSSLELRG----- 70
ident
Sbjct DEDTLNEILasrtnreireinrvykeelkrdlakditsdtsqdyqkalls1akgdrsedl 191
DSSP LHHHHHHHHhh11hhhhhhhhhhhh11111hhhhhhhh11hhhhhhhhhh11111111

```

```

DSSP -----11111111leeeelLLHHh
Query -----ipdsrtskdfatvarRDIEI 90
ident
Sbjct ainddladdaralyeagerkgtlnvfifitlrsyphlrrvfqkyskyskhMNVK- 250
DSSP 111hhhhhhhhhhhhhh11111111hhhhhhhhhh11hhhhhhhhhhhh111111LLL-

```

```

DSSP hHHHHHhhhhhh1111leeeel11ee11111111leeeeeeeleeeEeeeEeeel1
Query ihEQLAdagetgwegftaiftapeeiaapgxpvkprf1taklsyrgrafaTVPIevssve 150
ident
Sbjct --LDLE-----IKGDI----en 261
DSSP --LLLL-----LHHH----hh

```

```

DSSP 1111LLEEeee1hhhh111111leeeelLHHHHHHHHHHhh1111111LLLhHHHH
Query agnadQFDL1tsdalglvgvpaavavpcxTIPWQIAQKLHavtavleepkaNDRAhDLVD 210
ident
Sbjct cltvvVKCA-----tskpmFFAEK1HQAMK-----GIGT-RHKT 294
DSSP hhhhhHHHH-----h1hhhhHHHHHHHHHL-----LLL-LHHH

```

```

DSSP HHHHHHLLHHHHHHHHHHHHHHhh111111LLL1111hhhhhhhhhh111111111
Query LQLEGLLLDADLXPTRSAIAIFEaraqhpwPPRVAt1phwpliyagalegldhlelar 270
ident
Sbjct LIRIMVSRSEIDMNDIKACYQKLYG---islcQAILD-----e 329
DSSP HHHHHHLLLLHHHHHHHHHHHHHL---11hhHHHHH-----h

```

```

DSSP 1HHHHHHHHHHHHhhhh1111
Query tVDAAAQAVQRFVaridratkr 292
ident

```

No 710: Query=mol1A Sbjct=4bwrA Z-score=2.5

[back to top](#)

```
DSSP -----
Query ----- 0
ident -----
Sbjct nvnleqlkqkaesgeakaqlgelgyryfqgnettkdlqtaxdwfrraaeqgytpaeyvlg1 60
DSSP 111hhhhhhhhhh111hhhhhhhhhhhhhh111111hhhhhhhhhhhhhh111hhhhhhhhhh
```

DSSP -----
Query ----- 0
ident -----
Sbjct ryxngegvpqdyaqaviwykkaalkglpqaqnlgvxyhegngvkvdkaesvkwfrlaae 120
DSSP hhhh111111hhhhhhhhhhhhhh111hhhhhhhhhhhhhh111111hhhhhhhhhhhhhh

DSSP -----
Query ----- 0
ident -----
Sbjct qgrdsgqqsxgdayfegdgvtrdyvzarewyskaaeqgnvwsnqlgyxysrglgvernd 180
DSSP 111hhhhhhhhhhhh111111hhhhhhhhhhhh111hhhhhhhhhhhh111111h

DSSP -----
Query ----- 0
ident -----
Sbjct aisaqwyrksatsgdelgqlhladxyfygigtqdytsrvlfsqsaeqgnsiaqfrlgy 240
DSSP hhhhhhhhhhh111hhhhhhhhhhhh111111hhhhhhhhhhhh111hhhhhhhhhh

DSSP -----111LLL111hhhhhhhhhh
Query -----aapYSSPptnlrslrdrltqv 21
ident -----
Sbjct ileqglagakeplkalewyrksaeqgnsdqyyilahlydkaEGVA----- 286
DSSP hhhh111111hhhhhhhhhhhh111hhhhhhhhhhhh11LLL-----

DSSP hhh1111hhhhhhhhhhhhhhhh1111111111eeehhhhhhhhh1111111111ee
Query aerqgvfgrlqrhvaxivvaqfaat1tddtgaplllvkggsslelrrgipdsrtskdfa 81
ident -----
Sbjct -----knreqaiswytkxae 301
DSSP -----11hhhhhhhhhhhh

DSSP eeell1hhhhHHHHHHHHHH1111eEEEE---LLE---ELLL11111LEE-----e
Query tvarrdielIHEQLADAGetgwegfTAIF---TAPE---EIAAppxpvKPRR-----f 128
ident |
Sbjct qgdataqanLGAIYFRLGS-----eEEHKkavEWFRRkaaaKGEK---aaQFNLgnallqg 353
DSSP 111hhhhhhHHHHHHHHLLL---hHHHHhhHHHHHHhhLLLH---hhHHHHhhhhhh1

DSSP EEEeeelleeeeeeeeEEL-----111111LEEEeelhhhh111111eeE
Query TAKLsyrgrafatvpieVSSV-----eagnadqFDTLtsdalglvgvpaavavP 177
ident -----
Sbjct KGVK----kdeqqaaiWXRKaaeqglasaqvqlgeiyyYGLG-----V 392
DSSP LLL-----11hhhhhhHHHHhh111hhhhhhhhhhhhLLL-----L

DSSP ELLHHHHHHHHHHHHHHLL1111111LLHHHHHHHHHHHHLLHHHHHHHHHHHHHHHH
Query CXTIPWQIAQKLHAVTAVleepkandRAHDLVDLQLLEGLLDADLXPTRSACIAIFEAR 237
ident | | | | |
Sbjct ERDYVQAWAWFDTASTND-----xNLFGTENRNITEKKLTAQQLQAELLSQQYIEKY 445
DSSP LLLHHHHHHHHHHHHHHHH-----1LHHHHHHHHHHHHLLLHHHHHHHHHHHHHHHH

DSSP -LLL1111111111hhhhhhhh1111111111hhhhhhhhhhhhhh1111
Query -AQHPwpprvatlphwpliyagalegldhlelartvdaaaqavqrvaridrskr 292
ident -----
Sbjct aPEAW-----arxqklkaqsavktgk 467
DSSP 1HHHH-----hhhhh1111111111

[back to top](#)

DSSP -----111111LLLHHHHHHHHHHHHHHLLLHHHHHHHHHH  
Query -----aapyspPPTNLRSLRDLTQVAERQGVVFGRLQRHVAXI 39  
ident |  
Sbjct ghhhhxxddikvfqnevlgtlqrgkeENISCDNLVLEINSLKYAYNISLKEVXQVLSHV 60  
DSSP 1hhhhhhhhhhhhhhhhhhhhhhhhHHLLHHHHHHHHHHHHHHLLLHHHHHHHHHHHH

DSSP HHHHHHHLLL111111eeeehhhhhhhh1111111111eeeeel1hHHHHHHHHHH  
Query VVAQFAATLTDtgaplllvkkgsslelrrgipdsrtskdfatvarrdielIHEQLADAG 99  
ident |  
Sbjct VLEFPQQXDS-----p1DSSRYCALL 82  
DSSP HHHHHHHLLL-----1LHHHHHHHH

DSSP HLLLLLEeeee1leell1111111111eeeeeeeee1EEEE-----ee  
Query ETGWEGFtaiftapeeiaapgxpvkprftaklsyrGRAFA-----tv 142  
ident |  
Sbjct LPLLKAW-----SPVFrnyikraadhlealaaied 112  
DSSP HHHHHHH-----HHHHhh111hhhhhhhhhhhh

DSSP EEEEEel1111111111eeeeelhhhh1111111111eeeeel1hhhhhhhhhhhh1111111  
Query PIEVssveagnadqfdtlttsdalglvgrpvaavpcxtipwqiaqlhavtavleepkan 202  
ident |  
Sbjct FFLE-----healgisxakvlxafyqleilagetilswf 146  
DSSP HHHH-----1hhhhhhhhhhhhhhhh11111hhhhhhhh

DSSP LLLHHhhhhhhhhhh11hhhhhhhhhhhhhhhhhh1111111111111hhhhhhhh11  
Query DRAHdlvdqllegllldadlxptrsaciaifearaqpwprrvatlphwplyagaleg 262  
ident |  
Sbjct SQRD----- 150  
DSSP LLLL-----

DSSP 111111111hhhhhhhhhhhhhhhh1111  
Query ldhlelartvdaaqaqvrfrvaridratkr 292  
ident |  
Sbjct -----dkgqqlrknlqrfiqwlkeae 174  
DSSP -----1hhhh111hhhhhhhhhhhhhh1

No 712: Query=mol1A Sbjct=417mA Z-score=2.5

[back to top](#)

DSSP 111111111hhhhhhhhhhhhhh111hhhhhhhhhhhhhh11111111LEEEEE  
Query aapyspntnlrslrdrftqvaerqgvfgrlqrhvaxivvaqfaatlddtgaPLLVK 60  
ident |  
Sbjct -----NNPIISK 6  
DSSP -----LLLLLH

DSSP --HHHHH--hHHHL1111111111eeeeel1hHHHHHHHHHHHH1111eeeeel1leel  
Query --GGSSL--eLRRGipdsrtskdfatvarrdieliheqladagetgwefgtapeei 116  
ident |  
Sbjct teLRELVlswQILD----- 20  
DSSP hhHHHHh1LHHH-----

DSSP 111111111eeeeeeeeeelleeeeeeeeeel111111LLLEeeeeelhhhh111111lee  
Query aapgxpvkprftaklsyrgrafatvpiessveagnaDQFDtlttsdalglvgrpvaav 176  
ident |  
Sbjct -----avslalEDKR----- 30  
DSSP -----hhhhhhHLHH-----

DSSP eel1hHHHHHHHHHHhh11111111LLLH-HHHHHHHHHHH--LLHH-HHHHHHHHHHH  
Query pxtipwQIAQKLHAVtavleepkanDRAH-DLVDLQLEGL--LLDA-DLXPTRSACIA 232  
ident | | | | |  
Sbjct ---a1FLILELAGE-----DDEtRLRAFVALGEI1kRADSdLRXXVLERHL- 74  
DSSP ---hhHHHHHHLLL-----LLHHhHHHHHHHHHHH1LLLhhHHHHHHHHHH-

```

ident          |
Sbjct -----dvfINALSQE-----NEKVTIKALRALGYLVKDVPX 105
DSSP -----hHHLLLLL-----LHHHHHHHHHHHHHHHHLLLL

DSSP -----
Query ----- 292
ident
Sbjct gsktflkaaktlvsllespddxxrietidvlsklqpledsklvrtynelvvspdytkv 165
DSSP lhhhhhhhhhhhhhh11111hhhhhhhhhh11111111hhhhhhhhhhhh111hhhh

DSSP -----
Query ----- 292
ident
Sbjct agfcflnlnssadsghltlildeipsllqndnefivelaldvlekalsfpllenvkie 225
DSSP hhhhhhhhhhh111111hh1111hhhh1111hhhhhhhhhhhhhh11111111hhhh

DSSP -----
Query ----- 292
ident
Sbjct llkisrivdglyvregapiirlkakkvsdlidsvis 261
DSSP hhhhhhhhhhh111111hhhhhhhhhhhhhhhhhh11

```

No 713: Query=mol1A Sbjct=5byuA Z-score=2.5

[back to top](#)

```

DSSP 111111111hhhhHHHHhhHLL11HHHHHHHHHHHHHHHHLL1111111LEEEE
Query aapyssptnlrslrDRLTqvaERQGvvFGRLQRHVAXIVVAQFAATLtddtgapLLLVK 60
ident
Sbjct -einkiihkktfdiaWGM---DALGhvNNARYFDYFQEARIDWLREL-----DIKMT 49
DSSP -1111eEEEEe11HHHL---LLLL11LHHHHHHHHHHHHHHHHHL-----LLLL

DSSP hhhhhhhhh1111111111eEEEE11hhhhhhhhhhhhhh11LEEEEEELLEE11111
Query ggsslelrrgipdsrtskdfatvarrdieliheqladagetgweGFTAIFTAPEEiaapg 120
ident
Sbjct -----gqtgpvvihvactflkpiypatvTIHSKVNSLGN----- 84
DSSP -----1leEEEEe11111111eEEEEEEEEEL-----

DSSP 11111EEEEEEEL---LEEEEEEEEEe11111111eEEEE1hhhh11111lee
Query xpvkprRFATAKLSYR---GRAFATVPIEVSSveagnadqfdtlttsdalglvgpaavav 176
ident
Sbjct ----SSMIMDHDLYqeeLMAQGVSKIVWI----- 110
DSSP ----LEEEEEEEElleEEEEEEEEEE-----

DSSP eellhhHHHHhhhhhh1111111111hhhhhhhhhhhh11hhhhhhhhhhhhhhhh
Query pcxtipwQIAQklhavtavleepkandrahdldlqllegllldadlxptrsaciaifea 236
ident
Sbjct -----dYTQN----- 115
DSSP -----eLLLL-----

DSSP h1111111111111111hhhhhhhhhh1111111111hhhhhhhhhhhhhhhh1111
Query raqhpwpprvatlphwpliyagaleglhdlelartvdaaaqavqrfvaridratkr 292
ident
Sbjct -----ksvplpdiirnlv 128
DSSP -----e1111hhhh111

```

No 714: Query=mol1A Sbjct=1yv1B Z-score=2.5

[back to top](#)

```

DSSP 111111111hhhhhhhhhhhh1111111111hhhhhhhhhhhh1111111111e
Query aapyssptnlrslrdrltqvaerqgvfgrlqrhvaxivvaqfaatltddtgaplllvk 60
ident
Sbjct ----- 0

```





```

Query  pgxpvkprfrftaklsyrgrafatvpievsvsveagnadqfdTLTSdalglvgvpaavAVPC 178
ident
Sbjct  -----aaagrdstkafsafvgQMHQ-----QGIL 51
DSSP  -----111111hhhhhhhhhhHHHH-----LLLL

DSSP  -----1LHHHHHHHHHHHHHHHH--LLLL--LLLL---1LLLHHHHHHHHHHHHHL-----
Query  -----xTIPWQIAQKLHAVT--AVLE--EPKA---nDRAHDLVDLQLLEGLL----- 218
ident
Sbjct  ktddlitrFFRLCTEMCVEISYraQAEQqhNPAAnptmIRAKCYHNLDAFVRLIa1lvkh 111
DSSP  11hhhhhhHHHHHHHHHHHHHHHHhhHHHHh1LLL1hhhhHHHHHHHHHHHHHHhhhh1

DSSP  -----1HHHHHHHHHHHHHHHHHHLLLLLLL111111hhhhhhhhhh11111
Query  -----1DADLXPTRSACIAIFEARAQHPWPPrvatlphwplyagalegldh 265
ident
Sbjct  sgeatntvtkin11NKVLGIVGVLLQDHDVVRQSEFQQL----- 150
DSSP  1111111hhhhhhhhHHHHHHHHHHHHHHHHHHLLH-----

DSSP  111111hhhhhhhhHHHHHH-----hhhLLL-----
Query  lelartvdaaaqavQRFVA-----ridrATKR----- 292
ident
Sbjct  -----pyHRIFIm1llelnaletinfqtltafcnTFHIlrptkapgfyvawle 198
DSSP  -----hhHHHHHHhhhh1111hhhhhhhhhhHHHH11111hhhhhhhh

DSSP  -----
Query  ----- 292
ident
Sbjct  lishrifiarmlahtpqkqgwpmyaql1idlfkylapflrnveltkpmqilykgtlr1v1 258
DSSP  hh11hhhhhhhh1111hhhhhhhhhhhhhhhhhhhh1111hhhhhhhhhhhhhh

DSSP  -----
Query  ----- 292
ident
Sbjct  vllhdfpeflcdyhygfcdivppnciqlrnlilsafprnmrlpdpftpnkvdmlseini 318
DSSP  hhhhh1hhhhhh1hhhhhhhh1111hhhhhhhh1111111111111111111111hhhh1

DSSP  -----
Query  ----- 292
ident
Sbjct  apriltnftgvmpqqfkkdldsylktrspvtflsdlrsnlqvsnepgnrynlqlinalv1 378
DSSP  1111111hhhh11hhhhhhhhhhhh1111hhhhhhhhlee11111lee1hhhhhhhh

DSSP  -----
Query  ----- 292
ident
Sbjct  yvgtqaiasihngkstpsmstithsahmdifqnlavlddtegrylflnaiianqlrypsh 438
DSSP  hhhhhhhhhhh111111111111hhhhhhhhhh11hhhhhhhhhh111111hh

DSSP  -----
Query  ----- 292
ident
Sbjct  thyfsctmlylfaeanteaiqeitr11erlivnrphpwgl1itfieliknpafkfwnh 498
DSSP  hhhhhhhhhhh1111hhhhhhhhhhhh11111hhhhhhhhhh11hhhhhhhh

DSSP  -----
Query  ----- 292
ident
Sbjct  efveepeieklfqsvaqccm 519
DSSP  hhhhh111hhhhhhhhhh11

```

No 717: Query=mol1A Sbjct=5i6eA Z-score=2.4

[back to top](#)

```

DSSP  111111111hhhhhhhhhhhh1111hhhhhhhhHHHH-----hhh111111
Query  aapysspptnlrslrdrltqvaerqgvfgrlqrhvaxIVVAQ-----faat1tddtg 53

```





Query ----- 292  
ident  
Sbjct fiavfdispedveaafggflerfgkrllrlrvssaeiriikdpqtgapvplralinnvs 643  
DSSP eeeee111hhhhhh111111hhhhhh1leeeeeeeee1111leeeeeee11

DSSP -----  
Query ----- 292  
ident  
Sbjct gyviktemytevknakgewvfkslgkpgsmhlrpiatpypvkew 687  
DSSP 111leeeeeee1e111le1111111111111111111111111111111111

No 718: Query=mol1A Sbjct=3omsA Z-score=2.4

[back to top](#)

DSSP 111111111hhhhhhhhhhhhhh111hhhhhhhhhhhhhhhh111111111leeee 60  
Query aapyspntnlrslrdrltqvaerqgvfgrlqrhvaxivvaqfaatltddtgap111vk  
ident  
Sbjct ----- 0  
DSSP -----

DSSP hhhhhhhhh111111LLEEEEEELLLHHHHHHHHHHHHhh1111eeEELLLEELL-- 118  
Query ggsslelrrgipdsrtSKDFATVARRDIELIHEQLADAGetgwegftAIFTAPEEIAA--  
ident |  
Sbjct -----qKITTFLXFEGKAEEAXNFYTSLF-----DQSEIVSISRyde 37  
DSSP -----1LLEEEEEELLLHHHHHHHHHHLLL-----LLEEEEEEL11

DSSP -LLL---1LLEEEEEeellleeeEEEEEEEL--LLLL1LEEE----- 160  
Query -PGXP--vKPRRFTAKIsyrgrafaTVP1EVSSV--EAGNAdqFDTL-----  
ident || |  
Sbjct nGPGKegtviHATFTLN-----GQEFXCIDSyvNHNFT--FTPAXslyvtcetee 86  
DSSP 1LLL111eEEEEEEEL-----LEEEEEEL11LLL--LLL11leeeee1hh

DSSP -----eelhhHLLLLLEEEeelhhhhhhhhhhhh1111111111 205  
Query -----tsdalGLVGPAAVAVpcxtipwiaqlhavtavlepkandra  
ident  
Sbjct idtvfhklaqdgailxplgsYPFSKFGWLN----- 117  
DSSP hhhhhhhhh11leeeeeeeELLEEEEEEE-----

DSSP hhhhhhhhhhh11hhhhhhhhhhhhhhhh11111111111hhhhhhhhhh1111 265  
Query hdlvdlqllegllldadlxptrsaciaifearaqhpwprvatlphwplyagalegldh  
ident  
Sbjct ----- 117  
DSSP -----

DSSP 111111hhhhhhhhhhhhhhhh1111 292  
Query lelartvdaaaqavqrfvaridratkr  
ident  
Sbjct -----dkygvswq1t1a 129  
DSSP -----1111leeeeeel

No 719: Query=mol1A Sbjct=2i52F Z-score=2.4

[back to top](#)

DSSP 1111LLL----1hHHHHhhhhhhhh111hhhhhhHHHHHHHHHH11111111 55  
Query aapySSPP----tnlRSLRdrltqvaerqgvfgrlqrHVAXIVVAQFAAtltddtgap  
ident | |  
Sbjct ----SLYDpaekyfnctDIQ-----raffEAGIKLGAIH----- 31  
DSSP ----LLL11hh111LHH-----hhHHHHHHHHHH-----

DSSP leeeehhhhhhh111111111leEEEL--LHHHHHHHHHHHHHL1LLEEEEL 112  
Query 111vkggsslelrrgipdsrtskdfaTVARR--DIELIHEQLADAGETGwEGFTAIFTA  
ident | |



Sbjct DCMAKELPEHTVKLCDN1STKN----- 274  
DSSP LHHHHHHHHHHHHHHHHHhLLLL-----

DSSP 11111111111hHHHHHHHHHHHHHHHhLLLL-----  
Query egl dhlelartvDAAAQAVQRFVARidRATKR----- 292  
ident  
Sbjct ---skfedccqeKTAMDFVCTYFM--PAAQLpelpdvelptnkdvcdpgntkvmdkytf 329  
DSSP ---hhhhhh111LLHHHHHHHHHHL--LLLLL1111111111hh11111hhhhhhh

DSSP -----  
Query ----- 292  
ident  
Sbjct elsr rthlpevf lskvlept lkslgccdvedst tcfnakgp lkkelssfidkgqelca 389  
DSSP hhhhh1111hhhhhhhhhhhhhh11111hhhhhhhhhhhhhhhhhhhhhhhhhhhh11

DSSP -----  
Query ----- 292  
ident  
Sbjct dysentf teykkklaerlkaklpdatpkelaklvnkrdfasncsinspplycdseida 449  
DSSP 111111hhhhhhhhhhhhhh11111hhhhhhhhhhhhhhhhhhhh11111hhhhhhhhh

DSSP -----  
Query ----- 292  
ident  
Sbjct elknil 455  
DSSP hh1111

No 721: Query=mol1A Sbjct=3ct8A Z-score=2.4

[back to top](#)

DSSP 1111111111hhhhhhhhhhhh11LLHHHHHHHHHHHHHHHH1111111111eeee  
Query aapysp ptnlrslrdrltqvaerqgVVFGR LQRhvaxivvaqfaatltddtgapl11vk 60  
ident  
Sbjct -----NLYFQGX L----- 8  
DSSP -----L LLLLLL-----

DSSP hhhhhhhhh1111111LLEEEEEELL1HHHHHHHHHHHHH1111eEEEELLEE11111  
Query ggsslel rrgipdsrtsKDFATVARRdIELIHEQLADAGETGwegfTAIFTAPEEiaapg 120  
ident  
Sbjct -----HHVEINVDH-LEESIAFWDWLLGEL----GYEDYQSW S----- 41  
DSSP -----LEEEEEELL-HHHHHHHHHHHHHHL----LLEEEEEEL-----

DSSP 11111eeEEEEeelleEEEEEEeEELLLLLLLLLLEE-----  
Query xpvkpr rFTAKLsyrgraFATVPIeVSSVEAGNADQFDT----- 159  
ident  
Sbjct -----rgKSYKH-----GKTYLVfVQTEDRFQTPTFHRkrtglnh1afhaasrekvdel 90  
DSSP -----leEEEE-----LLEEEEEELHHHLLLLLLLL1111111111eeee11hhhhhhh

DSSP -----eeelhhhh1LLLLLEeeee11hhhhhhhhhhhh1111111111  
Query -----ltsdalglvGPAAVavpcxtipwqiaqklhavtavlepkandr 204  
ident  
Sbjct tqklker gdpilyedrhpfaggpnHYAVFC----- 120  
DSSP hhhhhhh1111111111111111LLEEEE-----

DSSP 1hhhhhhhhhh11hhhhhhhhhhhhhhhh111111111111hhhhhhhh1111  
Query ahd1vdlqlleg11ldadlxptrsaciaifearaqhpwprvatlphwpliyagalegld 264  
ident  
Sbjct ----- 120  
DSSP -----

DSSP 11111111hhhhhhhhhhhhhh1111  
Query hlelartvdaaaqavqr fvaridratkr 292  
ident  
Sbjct -----edpnrikveivap 133







DSSP LL-----  
 Query KR----- 292  
 ident |  
 Sbjct KSafvverqpcmpmhpdrplviktgvqfttkvrllvkfpeInyqlkikvcidkrgsrkfn 232  
 DSSP HHleeeeeee1111111111leee111leeeeeee1111111111leee111111111lee

DSSP -----  
 Query ----- 292  
 ident -----  
 Sbjct ilgtntkvmnmeengslsaefkhltlreqrvcivteelhlitfetevyhqgkidlethsl 292  
 DSSP eellleeeee111111leeeeeeeeeee1111hhhleelleeeeeee111leeeeeee11

DSSP -----  
 Query ----- 292  
 ident -----  
 Sbjct pvvvisnicqmpnawasilwynmltnnpkvnfftkppigtwdqvaevlsqwfssttkrg 352  
 DSSP leee111111hhhhhhhhhhhhhh1111111111111111111111111111111111111

DSSP -----  
 Query ----- 292  
 ident -----  
 Sbjct lsieqlttlaekllgpgvnysgcqitwakfckenmagkgsfswldniidlvkkyilal 412  
 DSSP 1111111111hhhh1111111111111111111111111111111111111111111111

DSSP -----  
 Query ----- 292  
 ident -----  
 Sbjct wnegyimgfiskererailstkppgtflrfsesskeggvtftwktqiQsvpytkqqln 472  
 DSSP 111111111111hhhh11111111111111111111111111111111111111111111

DSSP -----  
 Query ----- 292  
 ident -----  
 Sbjct faeiimgyktnilvsplvylypdipkeefgkycr 507  
 DSSP 1111111111111111111111111111111111111111111111111111111111

No 725: Query=mol1A Sbjct=3ebbA Z-score=2.4

[back to top](#)

DSSP -----  
 Query ----- 0  
 ident -----  
 Sbjct xniyfpkkeavtfdqanptqilgklkelngtapeekklteddlillekilslicnssek 60  
 DSSP 1111111111111111111111111111111111111111111111111111111111

DSSP ----LLLL---11LLLHHhHHHHHHHHHHHLLL-----1hhhhHHHHHHHHHHH-  
 Query ----AAPY---ssPPTNLRsLRDRLTQVAERQGV-----vfgRlqRHVAXIVVAQ- 43  
 ident | |  
 Sbjct ptvqQLQI1wkaiNCPEDI-VFPALDILRLSikhpsvnenfcnekegaqFSSHLINLLNp 119  
 DSSP 11hhHHHHhhhhhhLLELLL-LHHHHHHHHHHHLLhhhhhhhh1111hhHHHHHHHLLL

DSSP -----hhh1111111111EEEE-----hHHHHhh  
 Query -----faatlddtgapllLVK-----gSSLeIrr 68  
 ident |  
 Sbjct kgkpanqllalrtfcncfvqagqk1xxsqreSLXShaielksgsnknhialATLA--- 176  
 DSSP 111hhhhhhhhhhhhhhhhhhhhhhhhhhhhhhhhhhhhhhhhhhhhhhhhhhhhhhhhhhhh---

DSSP h1111111111leee111hhhhhhhhhhhhhh111leee111le111111111lee  
 Query rgipdsrtskdfatvarrdieliheqladagetgwegftaiftapeeiaapgxpvkprrf 128  
 ident -----  
 Sbjct ----- 176  
 DSSP -----

```

ident |
Sbjct -----lnysvcfhkdhNIEG-----kaQCLSLISTI 202
DSSP -----hhhhhhhhhh1LLHH-----hhHHHHHHHH

```

```

DSSP HHHhh111111111LLHH-HHHHHHHHHHL--LHHHHHHHHHHhhhhhh1111LLL
Query LHAVtavleepkandRAHD-LVDLQLEGLL--LDADLXPTRSACiaifearaqpWPPR 245
ident | | | |
Sbjct LEVV-----qDLEAtFRLLVALGTLIsdDSNAVQLAKSLG-----vdSQIK 243
DSSP HLL-----1LHHhhHHHHHHHHHHH1LHHHHHHHHHL-----hhHHHH

```

```

DSSP --LLLL1hhhhhhhh111111111LHHHHHHHHHHHHHHhh111
Query --VATLphwpliyyagalegldhlearTVDAAQAVQRFVARIDratkr 292
ident
Sbjct kySSVS-----EPAKVSECCRFILNLL----- 265
DSSP hhHLL-----LHHHHHHHHHHHLL-----

```

No 726: Query=mol1A Sbjct=3nmwB Z-score=2.4

[back to top](#)

```

DSSP 111111111hhhhhhhhhhhh111LHHHHHHHHHHHHHH-hhh11LLL-----
Query aapyspntlrslrdrltqvaerqgvVFGRLQRHVXIVVAQ-faat1TDDT----- 52
ident |
Sbjct -----HHHXLHLEQIRAYCEtcwewqEAHEdknpxpa 33
DSSP -----LHHHHHHHHHHHHhhhhhhHLLL111111

```

```

DSSP -----111leEEEH-----H
Query -----gap11LVKG-----G 62
ident
Sbjct pvehqicpavcvlxklsfdeehrhaixelgglqaiiaELLQvdcexyglndhysitlrrY 93
DSSP hhhh1hhhhhhhhhh111hhhhhhhh11hhhhhhHHHHhhhhhh1111hhhhhhhh

```

```

DSSP HHHHHHHL111111111eeee11hhhhhhhhhhhh1111eeee11ee111111
Query SSLELRRGipdsrskdfatvarrdieliheqladagetgwegftaiftapeiaapxp 122
ident |
Sbjct AGXALTNL----- 101
DSSP HHHHHHH-----

```

```

DSSP 111eeeeeeee11eeeeeeee11111111111111111111111111111111111111
Query vkprftaklsyrgrafatvpievssveagnadqfdtltsdalglvgvpaavavpcXTIP 182
ident
Sbjct -----tfgdvankatlcsxkGCXR 120
DSSP -----1111hhhhhhhhhh1HHHH

```

```

DSSP HHHhHHHHhh111111111LHHHHHHHHHHHHL---LHHHHHHHHHHhhhhhh1
Query WQIaQKLHAVtavleepkanDRAHDLDVDLQLEGLL---IDADLXPTRSACiaifeara 238
ident | |
Sbjct ALV-AQLKS-----ESEDLQQVIASVLRNLSwradVNSKKTREVG-----s 161
DSSP HHH-HHHHL-----LHHHHHHHHHHHHhh111HHHHHHHHHL-----h

```

```

DSSP 11111LLL1111hhhhhhhh1111111111LHHHHHHHHHHHHHHHLLL-----
Query qhpwpPRVAT1phwpliyyagalegldhlearTVDAAQAVQRFVARIDRATKR----- 292
ident |
Sbjct vka1xECALE-----vKKESTLKSVALWNLSAHCTENkadic 200
DSSP hhhhHHHHH-----1LHHHHHHHHHHHHHLLLHHhhhhh

```

```

DSSP -----
Query ----- 292
ident
Sbjct avdgalaf1vgtltyrsqtnltaiesgggilrnvsliatnedhrqilrennc1qtl1q 260
DSSP h111hhhhhhhh1111111111hhhhhhhhhhhhhhhhhh111hhhhhhhh11hhhhhh

```

```

DSSP -----
Query ----- 292
ident

```



```
DSSP -----
Query ----- 292
ident
Sbjct nlxanrpakyk 331
DSSP hhh1111hhh1
```

No 727: Query=mol1A Sbjct=2q0eA Z-score=2.3

[back to top](#)

```
DSSP 111111111hhhhhhhhhhhhhhllllllHHHHhhhhhhHHHHHHHHHH--LLLL11LLLLLEEE
Query aapyspntnlrsldrtrltqvaERQGVVFGRlqrhvaXIVVAQFAA-TLTDdtGAPLLLV 59
ident
Sbjct -----pspavgrslvnsFKQFVSKDL--htrhVDATYRVLdCVAAvdPLMRLYT 49
DSSP -----11hhhhhhhhhhllllllll--1hhhHHHHHHHHHHHHHHH11LLEEEEE
```

```
DSSP EHHHHHHhhh1111LLLL--LLEEEEEL-----1LHHHHHHHHHHHH
Query KGGSSLElrrgipdSRTS--KDFATVAR-----rDIELIHEQLADA 98
ident | | |
Sbjct FGSTVVY-----GVHEkgSDVDFVVLnkt dvedgkkgdaatqvakg LQADILAKLARV 102
DSSP ELHHHHH-----LLLL11LLEEEEEElhhhhh111111111hhhhHHHHHHHHHHHH
```

```
DSSP HHHLL11EEEEELLEEL1111111LLEEEEEEEeelleEEEEEEEEEEELL111111le
Query GETGWegFTAIFTAPEEIaapgxvKPRRF TAKLsyrgrAFATVPIEVSSVEagnadqfd 158
ident | | |
Sbjct IRQKH--LSWNVEEVRRT-----RVPVVRVKG-----GGAVDFDITAYRR----- 140
DSSP HHHHL--LLEEEEEELL-----LLEEEEEL-----LLEEEEEELL-----
```

```
DSSP eeeelhhhh11111111eIEEEllHHHHHHHH--hhhh1111L
Query tltsdalglvgypaavavpextiPWQIAQKL-----havgavleE 198
ident
Sbjct -----ngvRNSALLRAyfeqnppcrwlsmsikrwsqgtglnasvI 180
DSSP -----hhHHHHHHHHHHhhhhhhhhhhhhhhhhhh1111111
```

```
DSSP LLLL--LLHHhhhhhhhhhhhhhhhhhhhhhhhhhhhhhh111111111111hhhh
Query PKAND--RAHDlvdIqllegllldadlxptrsaciaifearaqhpwpprvalpwhply 256
ident
Sbjct GGSITsyGFNL----- 191
DSSP LLLLhhHHHH-----
```

```
DSSP hhh111111111111hhHHHHhhHHHH-----
Query agalegldhlelartvDAAAqavQRFV----- 283
ident
Sbjct -----mvyvylIqRNHL---QFVPPstidvsrveplpphpleepadeglelgtqvl 240
DSSP -----hhhhhhhhlllll---LLLLhhhh11hh11111111111111111hhhhhhh
```

```
DSSP -----
Query ----- 283
ident
Sbjct dflhfflhefdsdkqvslnrpgittkeeldwtksaedfarmngekvhyqwciedpyeln 300
DSSP hhhhhhh11111111ee11111111eehhhh11hhhhhhhleellee111111111111
```

```
DSSP -----hhhhh1111
Query -----aridratkr 292
ident
Sbjct InvgrnvtpIkrdfIrrhleKardtalltiv 331
DSSP 11111111hhhhhhhhhhhhhhhh111111
```

No 728: Query=mol1A Sbjct=2i4gA Z-score=2.3

[back to top](#)

```
DSSP 111111111hhhhhhhhhhhhhh1111hhhhhhhhhhhhhhhhhh1111111111-----
```





DSSP -----  
Query ----- 292  
ident -----  
Sbjct gsmecfaqlystlkegnppwevteavlfimaaiaksvdpennptlvevlegvvr1petvh 466  
DSSP lhhhhhhhhhhhh11111hhhhhhhhhhhh11hhhh11hhhhhhhhhhhhhh111111

DSSP -----  
Query ----- 292  
ident -----  
Sbjct tavrytsielvgemsevdrnpqfldpvlgymlkglcekplasaakaihnicsvcrdhm 526  
DSSP hhhhhhhhhhh11hhhhhh11hhhhhhhhhhhhhhhhhhhhhhhhhhhhhhhhhh111hh

DSSP -----  
Query ----- 292  
ident -----  
Sbjct aqhfnglleiarslsdfllspeaavgllkgtalvlarlpdkiteclselcsvqvmalkk 586  
DSSP h11hhhhhhhhhh1111111hhhhhhhhhhhhhhhhhhhhhhhhhhhhhhhhhhhhhhhh

DSSP -----  
Query ----- 292  
ident -----  
Sbjct llssdptvflrdlavifrhtnpivengqthpcqkviqeiwvplsetlnkhradnriverc 646  
DSSP l11111hhhhhhhhhhhh111111111111111111hhhh11hhhhhhhhhhhhhh1111hhhhhhhh

DSSP -----  
Query ----- 292  
ident -----  
Sbjct crclrfavrcvkgksaallqplvtqmvnyvhqhscfilylgsilvdeygmeeqcrqgll 706  
DSSP hhhhhhhhhhh11111hhhhhhhhhhhhhhhhhhhh111111hhhhhhhhhhhhhh11111hhhhhh

DSSP -----  
Query ----- 292  
ident -----  
Sbjct dmlqalcipftqllleqqnglqnhpdtvddlfrlatrfiqrspvtllrsqvvipilqwaia 766  
DSSP hhhhhhhhhhhhh11111111hhhhhhhhhhhhhhhhhhhhhhhhhh1111hhhhhhhhhhhh

DSSP -----  
Query ----- 292  
ident -----  
Sbjct sttlldhrdancsvmfrldlihtgvandheedfelrkeligqvmnqlgqqlvsqllhtcc 826  
DSSP h11111hhhhhhhhhhhhhhhhhh1111111111hhhhhhhhhhhhhh11hhhhhhhhhhhhhh

DSSP -----  
Query ----- 292  
ident -----  
Sbjct fclppyt1pdvaevlweimqvdrptfcrwlenslkg1pkettvthkqltdfhkqvtsaee 886  
DSSP h111hhhhhhhhhhhhhhhhhhhh11hhhhhhhhhhhh111111111111hhhhhhhhhh1111

DSSP -----  
Query ----- 292  
ident -----  
Sbjct ckqvcwalrdftr1fr 902  
DSSP hhhhhhhhhhhhh11

No 731: Query=mol1A Sbjct=2kjzA Z-score=2.3

[back to top](#)

DSSP 1111111111hhhhhhhhhhhhhh1111hhhhhhhhhhhhhhhhhh1111111111eeee 60  
Query aapyssptnlrslrdrltqvaerqgvfgrlqrhvaxivvaqfaat1tddtgap11lvk  
ident -----  
Sbjct ----- 0  
DSSP -----











```

Sbjct rrqngireavslrrrtgnaeiqkqltgllwnlsstdelkeeliadalpvladrviipfsg 142
DSSP  hhhllhhhhhhhhhhllllllhhhhhhhhhhhhhhhhllllllhhhhhhhhhhhhhhhhllhhhhll

DSSP -----
Query ----- 291
ident -----
Sbjct wcvvdpevffnatgclrnlsadagrqtmrnysglidslmayvqncvaasrcddksvenc 202
DSSP  lllllhhhhhhhhhhhhhhllllhhhhhhhhllllllhhhhhhhhhhhhhhhhllllllhhhh

DSSP -----
Query ----- 291
ident -----
Sbjct mcvlhnlsyrldaevptryrqlenyalpeeetnpgksgwlyhsdairtylnlmgkskda 262
DSSP  hhhhhhhllllhhhhllllhhhhhhhhllllllllllllhhhhhhllhhhhhhhhhhhhllllhh

DSSP -----
Query ----- 291
ident -----
Sbjct tleacagalqnltaskglmssgmsqliglkekglpqiarllqsgnsdvvrsgasllsnms 322
DSSP  hhhhhhhhhhhhhllllllhhhhhhhhhhllllllhhhhhhhhllllllhhhhhhhhhhhhhhhh

DSSP -----
Query ----- 291
ident -----
Sbjct rhpllhvrnmgqvfpvtrlltshtgntsnsedilssacytvrnlmasqplakqyfsss 382
DSSP  llhhhhhhhhhhllhhhhhhllllllllllllhhhhhhhhhhhhhhhhllllhhhhhhllhh

DSSP -----1
Query -----r 292
ident -----
Sbjct mlnniinlcrssaspkaaeaarlllsmwsskelqgv 420
DSSP  hhhhhhhhhhhllllllhhhhhhhhhhhhllllllllllll

```

No 735: Query=mol1A Sbjct=4yc7B Z-score=2.2

[back to top](#)

```

DSSP 111LLL-----11LHHHHHHHHhhhhhhllllhhhhhhhh 38
Query aapYSSP-----ptNLRSLRDRLtqvaerqgvfgrlqrhvax
ident -----
Sbjct eerFAIVlnamnlppdkarllrqydnekkweLICDQERFQ-----vknp 44
DSSP 111LLLlhhhl11hhhhhhhhllllhhhhhhHHHHHHHLL-----1111

DSSP HHHHHHHHLL--LLL-----1111EE
Query IVVAQFAATL--TDDT-----gapLLL 58
ident -----
Sbjct PHTYIQKLGyLDPAVtrkkfrrrvqestqvlreleislrtnhigwvreflneenkglDV 104
DSSP HHHHHHHHHHhLlLLllhhhhhhhhhhhhhhhhhhhhhhllhhhhhhhhllllhhHH

DSSP EE-----HHHHHHHHLLl11111leeeell
Query VK-----GGSSLELRGIPdsrtskdfatvarr 86
ident -----
Sbjct LVeYlsfaqyavtfsrrtlknsrlvskkddvhvcIMCLRAIMNYQY----- 150
DSSP HHHhhhhhhhhllllllhhhhhhhhhhllllhhhhHHHHHHHLLHH-----

DSSP lhhhhhhhhhhhhllllleeeelllellllllllleeeeeeeleeeeeeeee 146
Query dieliheqladagetgwegftaiftapeeiaapgxpvkprftaklsyrgrafatvpiev
ident -----
Sbjct ----- 150
DSSP -----

DSSP eell111111leeeellhhhhllllleeeellHHHHHHHHHHhhllllllllllLH 206
Query ssvagnadqfdtltsdalglvgvpaavavpcXTIPWQIaQKLHAVtavleekandRAH
ident |
Sbjct -----gfnvmshpHAVNEIA-LSLNN-----KNPR 175

```









```
Sbjct Q-GIRT----VAQSaqniangtsflkdpskshhitgdaIDFAPYingkidwndleAFWA 92
DSSP E-LLLL----LLHHhhhhhh11111111111111hh1leEEEEEEellee1111hhHHHH

DSSP HHHHHHHHHHLL1leEEEELL-----EELL1111LLEE-EEEEeelleeee
Query IHEQLADAGETGwegfTAIFTAP-----EEIAApgxpVKPRR-FTAKLsyrgrafa 140
ident || ||
Sbjct VKKAFEQAGKELG---IKLRFGAdwnasgdyhDEIKR---GTYDGgHVELV----- 137
DSSP HHHHHHHHHHHL---LLLLLLLhhhh1111111111---LLLLLLEEEL-----

DSSP eeeeeee1111111111eEEEEllhhhh1111111111eEEEEllhhhhhhhhhhhhhh111111
Query tvpievssveagnadqfdtltsdalglvvpvaavavpcxtipwqiaqklhavtavleepk 200
ident
Sbjct ----- 137
DSSP -----

DSSP 1111hhhhhhhhhhhhhhhh11hhhhhhhhhhhhhhhhhhhh11111111111111hhhhhhhh
Query andrahldvdlqllegllldadlxptrsaciaifearaqhpvprvatlphwplyagal 260
ident
Sbjct ----- 137
DSSP -----

DSSP 111111111111hhhhhhhhhhhhhhhh1111
Query eglhdhleartvdaaaqavqrfvaridratri 292
ident
Sbjct ----- 137
DSSP -----
```

No 741: Query=mol1A Sbjct=1gxbd Z-score=2.2

[back to top](#)

```
DSSP 11111111111hhhhhhhhhhhhhhhh1111hhhhhhhhhhhhhhhh1111111111eeEE
Query aapyspptnlrsldrdrlltqvaerqgvfgrlqrhvaxivvaqfaatltddtgap111VK 60
ident
Sbjct -----MN 2
DSSP -----LL

DSSP HHHHHHHHHL1111111111eEEEEllhhhhhhhhhhhhhh1111eEEEEllle1111
Query GGSLELRRGipdsrtdfvarrrdieliheqladagetgwegftaiftapeeiaapg 120
ident |
Sbjct INEILKKLIN----- 12
DSSP HHHHHHHHHL-----

DSSP 1111eEEEEEEeelleEEEEEEEEe1111111111eEEEEllhhhh11111eEEEElL
Query xpvkprfrftaklsyrgrafatvpievssveagnadqfdtltsdalglvvpvaavavpcXT 180
ident
Sbjct -----ksdleIN 19
DSSP -----1111hH

DSSP HHHHHHHHHH1111111111LLHH-HHHHHHHHHL1hhhhHHHHHHHHHHHHHHHLL
Query IPWQIAQKLHAVTavleepkandRAHD-LVDLQLEGLL1dadLXPTRSACIAIFEARAQ 239
ident | |
Sbjct EAEELAKAIIRGE-----vPEILvSAILVALRMKG---eSKNEIVGFARAMRELA 67
DSSP HHHHHHHHHLL-----1LHHhhHHHHHHHHHHHL---1LHHHHHHHHHHHHHLL

DSSP -----
Query ----- 239
ident
Sbjct kidvpnaidtagtggdglgtvsnstasailslvnpvakhgnravsgksgsadvlealgy 127
DSSP 1111111eEEEE1111111111hhhhhhhhhh1111eEEEE11111111hhhhhhhh11

DSSP -----11111111111hhhhhhhhhh1111111111hH
Query -----hpwppRVATlphwplyagaleglhdhleartvD 273
ident ||
Sbjct niivpperakelvnktnfvflfaqyyhpamkNVAN-----vrK 165
```











Query LLEGLLL-----DADLXPTRSACIAIFEARA----- 238  
ident | |  
Sbjct AQIFFSLgpgfgvllafasynkfnnncyqdalvtsVVNCMTSFVSGFVIFTVLGymaemr 317  
DSSP HHHHHHHH11111hhhhhh1111111hhhhhhhhHHHHHHHHHHHHHHHHHHHHhhhh1

DSSP -----  
Query ----- 238  
ident -----  
Sbjct nedvsevakdagpsllfityaeaianmpastffaiiffmlitlgltdssfaglegvitav 377  
DSSP 11111hhhh11111hhhhhhhhhhhhhhhhhhhhhhhhhhhhhhhhhhhhhhhhhhhhhhhhhh

DSSP -----  
Query ----- 238  
ident -----  
Sbjct ldefphwakrrerfvlavvitcfftgslvtltfggayvkvkleeyatgpavltvalieav 437  
DSSP hhh11111111hhhhhhhhhhhhhhhhhhhh1111111hhhhhhhhhh1lhhhhhhhhhhhhhhhh

DSSP -----1111111111111hhhhhhhhhh1LLL-LLLL--LLHHH-----  
Query -----qhpwpprvatlphwpliyagaleGLDH-LELA--RTVDA----- 274  
ident |  
Sbjct avswfygitqfcrdvkemlgfsgpwwfwrwvvaISPLfLLFIiaSFLMSppqlrlfqyny 497  
DSSP hhh11111hhhhhhhhhh111111hhhhhhhhHHHHhHHHHhhHHHHL11111111111

DSSP -----hhhhhhhhhhhhhh1111  
Query -----aaqavqrvaridratkr 292  
ident -----  
Sbjct pyysiilgyaigtssficiptyiayrliitpgtfkeriiksitpetp 544  
DSSP 111hhhhhhhhhh1111hhhhhhhhhh1111hhhhhhhhhh1111

No 745: Query=mol1A Sbjct=2wzka Z-score=2.2

[back to top](#)

DSSP 1111111111hhhhhhhhhhhhhh1111hhhhhhhhhhhhhhhh1111111111eeee 60  
Query aapyspntnlrslrdrltqvaerqgvfgrlqrhvaxivvaqfaatltddtgaplllvk  
ident -----  
Sbjct ----- 0  
DSSP -----

DSSP hhhhhhhhh1111111111eeeeellhhhhhhhhhhhhhh1111eeeeellle1111  
Query ggsslelrrgipdsrtskdfatvarrdieliheqladagetgwegftaiftapeeiaapg 120  
ident -----  
Sbjct ----- 0  
DSSP -----

DSSP 11111eeeeeeeelleeeeeeeeeell1111111111eeeeellhhhh1111111111eeeeLL  
Query xpvkprfaktaklsyrgrafatvpievssveagnadqfdtlttsdalglvgvpaavavpcXT 180  
ident -----  
Sbjct -----slqfED 6  
DSSP -----111hHH

DSSP HHHHHHHHHHHHLL11111LLLH-HHHHHHHHHHHH---LHHHHHHHHHHHHHHHHH  
Query IPWQIAQKLHAVTAVleepkaNDRAH-DLVDLQLEGLL---LDADLXPTRSACIAIFEA 236  
ident | | | |  
Sbjct KWDFMHP1VLKLLRQ-----ESVTKqQWFDLFSVDVHAVc1wDDKGSSKIHQALKEDILE 60  
DSSP HHHHHHHHHHHHHHLL-----LLLHhHHHHHHHHHHHHhhLLLHHHHHHHHHHHHHHH

DSSP HLL-----11111LLL1111hhhhhhhhhh1111111111h  
Query RAQ-----hpwppRVATlphwpliyagalegldhlelartv 272  
ident -----  
Sbjct FIKqaqarvlshqddtallkayivewrkfftqCDIL----- 96  
DSSP HHHhhhhhh11111hhhhhhhhhhhhhhhhhhhhLLL-----

DSSP hhhhhhhHHHHHHH-----  
Query daaaqavQRFVARI----- 286

DSSP -----  
 Query ----- 286  
 ident -----  
 Sbjct geafdsqvlvigvresyvnlcspnedklqiyrdnfekayldsterfyrtqapsylqqngvq 209  
 DSSP 111111hhhhhhhhhhhh11111111hhhhhhhhhhhhhhhhhhhhhhhhhhhhhhhhhh

DSSP -----  
 Query ----- 286  
 ident -----  
 Sbjct nymkyadakilkeekralryletrrcnsvealmeccvnalvtsfketilaecqgmikrn 269  
 DSSP hhhhhhhhhhhhhhhhhhh11111111hhhhhhhhhhhhhhhhhhhhhhhhhhhhhhhhhh

DSSP -----  
 Query ----- 286  
 ident -----  
 Sbjct etekhlhlmfslmdkvpngiepmkdleehiisagladmvaaaetitttdekyreqldtlf 329  
 DSSP 1hhhhhhhhhh11111111hhhhhhhhhhhhhhhhhhhhhhhhhhhhhhhhhhhhhhhhhh

DSSP -----hh1111  
 Query -----dratkr 292  
 ident -----  
 Sbjct nrfsklvkeafqddprfltardkaykavvdatifkaenl 369  
 DSSP hhhhhhhhhhh111hhhhhhhhhhhhhhhhhhhhhhhhhhhh111111

No 746: Query=mol1A Sbjct=4yaya Z-score=2.2

[back to top](#)

DSSP 1111111111hhhhhhhhhhhhhhhh1111hhhhhhhhhhhhhhhhhh1111111111eeee  
 Query aapyspntnlrslrdrltqvaerqgvfgrlqrhvaxivvaqfaatltddtgaplllvk 60  
 ident -----  
 Sbjct ----- 0  
 DSSP -----

DSSP hhhhhhhhh1111111111eeeeell1hhhhhhhhhhhhhhhh1111eeeeelllee11111  
 Query ggsslelrrgipdsrtskdfatvarrdieliheqladagetgwegftaiftapeeiaapg 120  
 ident -----  
 Sbjct ----- 0  
 DSSP -----

DSSP 111111eeeeeeeeell1eeeeeeeeeeell1111111111eeeeellhhhh111111eeeeelL  
 Query xpvkprfrtaklsyrgrafatvpievssveagnadqfdtlttsdalglvgvpaavavpcxT 180  
 ident -----  
 Sbjct -----dleD 4  
 DSSP -----lhhH

DSSP HHHHHHHHHHHHLL111111LLL-LHHHHHHHHHHHLL-----hhhhhhhhhh  
 Query IPWQIAQKLHAVTAvleepkANDR-AHDLVDLQLEGLLL-----dadlxptrsac 230  
 ident | |  
 Sbjct NWETLNDNLKVIEW---adNAAQvKDALTKMRAAALDAQkatppkledkspdspemkdf 60  
 DSSP HHHHHHHHHHHHHH---11LHHHHHHHHHHHHHHHHHHHH111111111111hhhhhh

DSSP hhhhhhh1111111111LLLHhhhhhhhh1111111111hhhhHHHHHHHHHHHHH-L  
 Query iaifearaqhpwpprvaTLPHWpliyagaleglhdhlelartvdaaAQAVQRFVARIDR-A 289  
 ident |  
 Sbjct rhgfdilvgqiddalkIANEGK-----vkeaQAAAEQLKTRNAyI 101  
 DSSP hhhhhhhhhhhhhhhhhHLL-----lhhHHHHHLLHHHHHHHHH

DSSP LLL-----  
 Query TKR----- 292  
 ident |  
 Sbjct QKY1ilnssdcpkagrnyifvmiptlysiifvvgifgnslvviviyfymkktvasvfl 161  
 DSSP HHH11111111111111111111hhhhhhhhhhhhhhhhhhhhhhhhhhhhhhhhhhhhhhhhhh

```

ident
Sbjct Inlaladlcfl1tlplwavytameyrwpgnylckiasasvsfnlyasvfl1tclsidry 221
DSSP hhhhhhhhhhhhhhhhhhhhhhhhhhhhhhhhhhhhhhhhhhhhhhhhhhhhhhhhhhh

DSSP -----
Query ----- 292
ident
Sbjct laivhpmksrlrrtmlvakvtciiiwllaglaslpaiihrnvffiiitvcafhyetlpigl 281
DSSP hhh1111111hhhhhhhhhhhhhhhhhhhhhhhhhhhhhhhhhheeeelllleeell11111hhh

DSSP -----
Query ----- 292
ident
Sbjct gltknilgflfpfliiltstlyliwkaalknnddifiikiimav1ffffswiphqiftfldvl 341
DSSP hhhhhhhhh1hhhhhhhhhhhhhhhhhhhhhhhhhhhhhhhhhhhhhhhhhhhhhhhhhhhhhhhh

DSSP -----
Query ----- 292
ident
Sbjct iqlgiirdcriadivdtampiticiayfnnclnplfygflgkkfkryflqll 393
DSSP hhh11111hhhhhhhhhhhhhhhhhhhhhhhhhhhhhhhhhhhhhhhhhhhhhhhhhhhhhhhh

```

No 747: Query=mol1A Sbjct=2wm9A Z-score=2.2

[back to top](#)

```

DSSP -----111
Query -----aap 3
ident
Sbjct stpelrktwldsmarihvknngdlseaamcyvhvta1vaeyltrkgvfrqgctafrvitpn 60
DSSP 1hhhhhhhhhhhhhhhhhhhhhhhhhhhhhhhhhhhhhhhhhhhhhhhhhhhhhhhhhh

DSSP 1111111hhhhhhhhhhhhhhhhhhhhhhhhhhhhhhhhhhhhhhhhhhhhhhhhhhhhhhhh 63
Query ysspntlrsldr1tqvaerqgvfgrlqrhvaxivvaqfaat1tddtgap11lvkgs
ident
Sbjct ideeadvhfnedvlmelleqcadglwkaeryeliadiyklippiyekrrdferlahlydt 120
DSSP hhhh111111hhhhhhhhhhhhhhhhhhhhhhhhhhhhhhhhhhhhhhhhhhhhhhhhhhhhhh

DSSP hhhhhh1111111111111111111111111111111111111111111111111111111 123
Query slelrrgipdsrtskdfatvarrdieliheqladagetgweGFTAiftapeeiaapgxpv
ident
Sbjct lhrayskvtevmhsgrrllgtyfrvaffgqgffededgkeyIYKE----- 165
DSSP hhhhhhhhhhhhhhhhhhhhhhhhhhhhhhhhhhhhhhhhhhhhhhhhhhhhhhhhhhh

DSSP 1leeeeeeeellleeEEEEEEEEe111111111111111111111111111111111111111 169
Query kprrfaklsyrgraFATVpievssveagnadqfdt1tsdalGLVG-----
ident
Sbjct -----pK1TP-----1seiSQRLLklysdkfgsenvkm 193
DSSP -----1LLL-----hhhHHHHHHhhhhhhhhhhhhhhhhhhh

DSSP -----1111EEEE----- 177
Query -----vpaaVAVP-----
ident
Sbjct iqdsgvnvpkdl1dskayiqvthvipffdekelqerktefershnirrfMFEMpftqtgk 253
DSSP e1111111hhhh11111111111111111111111111111111111111111111111111

DSSP -----eLLHHHHHHHHHHHHHHH 194
Query -----cXTIPWQIAQKLHAVTA
ident
Sbjct rqqgveeqckrrtiltaihcfpvkkripvmqhh1dlnpievaIDEMSKVAELRQLCS 313
DSSP 11111111111111111111111111111111111111111111111111111111111111

DSSP LL111111LLLLHHHHHHHHHHH---hhLLHHH-----hhhHHHHHHhhhhhh 237
Query VLeepkANDRAHDLVLDLQLE---gLLDAD-----lxptRSACIaifear
ident | | |

```

```
DSSP 11111LLL--LLLLhhhhhhhhhh11111111LHHHHHHHHHHHHHHHH--LLL--
Query aqhpwPPRV--ATLPhwpliYagalegldhlelarTVDAAAQAVQRFVARIDR-ATKR-- 292
ident
Sbjct --eacGQALavNERL-----ikeDQLEYQEEMKANYREMAKeLSEImh 404
DSSP --hhhHHHHhhHHH-----111LLLHHHHHHHHHHHHHHHHHHh1
```

```
DSSP ---
Query --- 292
ident
Sbjct eq1 407
DSSP 111
```

No 748: Query=mollA Sbjct=4owwA Z-score=2.2

[back to top](#)

```
DSSP 111111111hhhhhhhhhhhh111hhhhhhhhhhhhhhhh11111111leeee
Query aapyssptnlrslrdrltqvaerqgvfgrlqrhvaxivvaqfaatltddtgaplllvk 60
ident
Sbjct ----- 0
DSSP -----
```

```
DSSP hhhhhhhhh11111111leeeee11hhhhhhhhhhhhhh11leeeEELLLEEL----
Query ggsslelrrgipdsrtskdfatvarrdieliheqladagetgwegftaIFTAPEEI---- 116
ident
Sbjct -----r111stsLDAKDELEerle 19
DSSP -----111111LLLHHHHhhhh
```

```
DSSP ----11111111leeeeeeeleeeeeeeeeee11111111leeee1hhhh1111
Query ----aapgxpvkprfrftaklsyrgrafatvpievssveagnadqfdlttsdalglvgvp 171
ident
Sbjct rcmsivtsmtagvsereandalnayvckglpqheeiclgfltliltepaqakcyrdlal 79
DSSP hhhhhhhhh11111hhhhhhhhhhhh11hhhhhhhhhhhhhhhhhhhhhhhhhhhhhhhh
```

```
DSSP 1leEEEE-----LLHHHHHHHHHHHH
Query aavAVPC-----XTIPWQIAQKIHAVT 193
ident
Sbjct vsrDGMNivlnkinqilmekylkldtcrtrqlvwlvre1vksgv1GADGVCMTFM-KQIA 138
DSSP h11LLLHHHHHHHHHHHHHHHHhh11hhhhhhhhhhhhhhhh1111LHHHHHHHHH-HLLL
```

```
DSSP LL1111111LLLHHHHHHHHHH-HHLL--HHHHhHHHHhhhhhhhh11111LLL11
Query AVleepkanDRAHDLVDLQLE-GLLL--DADLxPTRSaciaifearaqhpwPPRVATlp 250
ident
Sbjct GG---dvtakNIWLAESVLDILtEQREwvLKSS-ILIA-----mavytyLRLIVD-- 184
DSSP LL---11hHHHHHHHHHHHHHHHhLHhHhLLH-HHHH-----hhhhhhHHHHLL--
```

```
DSSP 1hhhhhhhh11111111LHHHHHHHHHHHHHHH-HLLL-----
Query hwpliYagalegldhlelarTVDAAAQAVQRFVARID-RATK----- 291
ident
Sbjct -----hghtAQLQALRQKEVDFCISLLrERFMeclmigrdlvrllqnvar 229
DSSP -----1111HHHHHHHHHHHHHHHHHHhLHHHHhhhh11hhhhhh1111
```

```
DSSP -----
Query ----- 291
ident
Sbjct ipefellwkdiihnpqalspqftgilqlqsrtsrkflaclrtpdmetkl1fmrsvrfg 289
DSSP 1hhhhhhhhhhhh1111111hhhh1111hhhh1111hhhhhhhhhh111111
```

```
DSSP -----
Query ----- 291
ident
Sbjct qqkryqdwfqrqylstpdqsrlredlirycgvvhpsnevlssdilprwaiigwllttct 349
DSSP 1hhhhhhhhhhhh11hhhhhhhhhhhhhhhh1111hhhh11111hhhhhhhhhh1111
```







```

DSSP  LLL--LLEE--EEHH-----hhHHHHHL11111111leeeell1hhhhhhh
Query  DTGA--PLLL--VKGG-----ssLELRGipdsrtskdfatvarrdieliheq  95
ident
Sbjct  ERELkvaYTTVlqeWLRlacrsdahpelyRRHLVT-----  60
DSSP  HHHHHhhHHHHhhHHHHhh11111hhhhHHHHHH-----

DSSP  hhhhhh1111leeeell1leell11111111leeeeeeelleeeeeeeeeeeL11111
Query  adagetgwegftaiftapeeiaapgxpkprftaklsyrgrafatvpievssVEAGnad  155
ident
Sbjct  -----framsar1ldyvvniaDSNG---  80
DSSP  -----hhhh1hhhhhhh1111LLL-----

DSSP  1leeeellhhhh11111leeeellhhHHHHHHHHHH1111111111hHHHHHHHH
Query  qfdtltsdalglvgvpaavavpcxtipWQIAQKLHAVtavleekandrahDLVDLQLE  215
ident
Sbjct  -----nTALHYSVSHA-----NFPVVQQL  100
DSSP  -----1LHHHHHHHLL-----LHHHHHHHH

DSSP  HLLhhhhHHHHHHhhhhhhhh1111LLL-L1111hhhhhhhh1111111111HH
Query  GLLdadlxPTRSAciaifearaqhpWPPR-VATLphwplyagalegldhlelartVDA  274
ident
Sbjct  DSGV---cKVDKQ---nragspiMLTAATLK-----TQD  130
DSSP  HLL---1LLL---11111hhHHHHHLLL-----LHH

DSSP  HHHHHHHHHHHHHHLL-----
Query  AAQAVQRFVARIDRATK-----  291
ident
Sbjct  DIETVLQLFRLGNINAKasqagqta1mlavshgrvdvkvallaceadvnvqdddgstalm  190
DSSP  HHHHHHHHHHHHLLL11111111hhhhhhhh111hhhhhhhh111111111111hh

DSSP  -----1
Query  -----r  292
ident
Sbjct  cacehghkeiaglllavpscdisltdrdgstalmvaldagqseiasmlysrnmik  245
DSSP  hhhhh11hhhhhhhh111111111111hhhhhhhh11hhhhhhhh1111

```

No 752: Query=mol1A Sbjct=4i2wA Z-score=2.1

[back to top](#)

```

DSSP  -----
Query  -----  0
ident
Sbjct  vqtaeerdegnaavkdqdyikadelytealqlttdedkalrpvlyrnraxar1krddfe  60
DSSP  111hhhhhhhhhhhhhh11hhhhhhhhhhhh1111hhhh1hhhhhhhhhhhh11hh

DSSP  -----11111111LLHHHH
Query  -----aapyspptNLRSLR  15
ident
Sbjct  gaqsdctkalefdgadvkalfrslareqlgnvgpafqakearlrlspndkgiVEVLQRL  120
DSSP  hhhhhhhhh11111hhhhhhhhhhhh111hhhhhhhhhh11111hhHHHHHHHH

DSSP  HHHhhhhhh1111hhhhhhhhhhhhHHHH11111111LEEE-----
Query  DR1tqvaerqgvfgrlqrhvaxivvaQFAAt1tddtgapLLLV-----  59
ident
Sbjct  VK-----anndkikQTTS-----1aNKVTdxeklafrgeakdteq  155
DSSP  HH-----hhh1hhHHHH-----hHHHHHHhhhh1111111hh

DSSP  ---ehHHHHHHHH11111111leeeell1hhhhhhhhhhhh1111leeeell1leel
Query  ---kgSSLELRGipdsrtskdfatvarrdieliheqladagetgwegftaiftapeei  116
ident
Sbjct  kxta1NNLLVLCRE-----  169
DSSP  hhhhhHHHHHHHHLL-----

```

```

ident
Sbjct -----sesgatg 176
DSSP -----lhhhhh

DSSP eeLHHhHHHHHHHHHLL11111LLL-HHHHHHHHHHHH-LHHHHHHHHHHhhhh
Query pcXTIPwQIAQKLHAVTAVleepkaNDRA-HDLVDLQLLEGLL-LDADLXPTRSaciaif 234
ident
Sbjct vwNQGA-LVPFVLNLINDA-----SENEeVTVTAIRILDETIkNSVRCXKFLAX-hdpd 228
DSSP hHHHL-HHHHHHHHHHLL-----LLLhHHHHHHHHHHHLL1LHHHHHHHHHLL-1111

DSSP hhh111LLL--LLL111hhhhhhhh1111111111hHHHHHHHHHHHHHHH-LLL
Query earaqhWPPP--RVATlphwpliyagalegldhlelartvDAAAQAVQRFVARIDR-ATK 291
ident
Sbjct gpksvrFVCRIxCKKS-----TKDFVDATGILVQRFVnAXA 264
DSSP hhhhhHHHLhhHLL-----LHHHHHHHHHHHHHHHHL

DSSP L-----
Query R----- 292
ident
Sbjct Kxdrqkexkpdpevaeankiwiirvlllelqexlqdpkvgavqretcidflknlxhdgg 324
DSSP L111111111hhhhhhhhhhhhhhhh111111111hhhhhhhhhhhhhhhh111111

DSSP -----
Query ----- 292
ident
Sbjct iprgswkfveergllalldvasqipelceypvsatrqhvaiclqrleedxvfdtkrti 384
DSSP 1111hhhhhh11hhhhhhhhhh11111111111111111111hhhhhhhhhhhh1111hhhhhh

DSSP -----
Query ----- 292
ident
Sbjct fkekvdxfnalisrcnddeghkyriklsclitxlgpvdiginlitndqltpixlex 444
DSSP hhhhhhhhhhh1111111111hhhhhhhhhhhhhhhh11hhhhhhhh1111hhhhhhhh

DSSP -----
Query ----- 292
ident
Sbjct aasqdhlxqgiaaelivatvskherainxlvkipvlralydsedptkvralvglckig 504
DSSP hh111hhhh111111111111111111111111111111111hhhhhhhhhh1111111111

DSSP -----
Query ----- 292
ident
Sbjct aeeavislaktckkflletekysvdirryaceglsylsldadvkewivdds111kalvll 564
DSSP 11111hhhhhhhhhh1111111111111111111111111111111111111111hhhhhhhhhh

DSSP -----
Query ----- 292
ident
Sbjct akkagalcvytlatiyanlsnafekpkfakhhvpethpkdteeyvekrvalveegavpa 624
DSSP hhhhhhh1hhhhhhhhhh1111111111111111111111111111111111111111hhhhhhhhhh1111hh

DSSP -----
Query ----- 292
ident
Sbjct cvavsktesknaeliarsllafaeyedlrgriiaeggtvlclrltkeasgegkikagha 684
DSSP hhh1111111hhhhhhhhhh1111111111111111111111111111111111111111hhhhhhhhhh

DSSP -----
Query ----- 292
ident
Sbjct iaklgakadpxisfpgqrayevvkplcdllhpvegkanydslltlnlasvsdsirgri 744
DSSP hh1111111hh11111hhhh111hh111111111111111111111111111111111hhhhhhhh1111hhhhhh

DSSP -----
Query ----- 292

```

DSSP -----  
Query ----- 292  
ident  
Sbjct eeerlsrasaagfailtedenacarixdeikswpevfkdiaxhedaetqrrglxgianix 864  
DSSP 1111hhhhhhhhhhhhhh11hhhhhh1hhhh111hhhhhhhhhh11111hhhhhhhh1hhhh

DSSP -----  
Query ----- 292  
ident  
Sbjct hssnklcseivssevfrvlvavtklgtinqueragsteqak 904  
DSSP 1111hhhh1111hhhhhh11111111hhhhhhhhhh111

No 753: Query=mol1A Sbjct=3q0qA Z-score=2.1

[back to top](#)

DSSP 111111111LHHHHHHHHHHhhhhhh1111HHHHHHhhHHHHHHHH-----hh  
Query aapyspntNLS1RDRLtqvaerqgvvFGRLQRhvAXIVVAQF-----aa 46  
ident  
Sbjct grsrllfedfRNNR-FPNL-----QLRDLI-gHIVEFSQDqhgsrfiqqklera tp 48  
DSSP 111hhhhhhHLLL-LLLL-----LHHHHL-1LHHHHHLLhhhhhhhhhh1111h

DSSP 111111111leEEH-----HHHHHHHLL11111111leeee111hhhhhhhhhh  
Query t1tddtgap11LVKG-----GSSLELRGipdsrtskdfatvarrdieliheqlad 97  
ident  
Sbjct aerqmvfneilQAAYqlmtdvfgnYVIQKFFEF----- 81  
DSSP hhhhhhhhhhhHLLHHhh11111hHHHHHHHH-----

DSSP hhhh111leeee11le11111111leeeeeee1leeeeeeeee111111111  
Query agetgwegftaiftapeeiaapgxpvkprftaklsyrgrafatvpielvssveagnadqf 157  
ident  
Sbjct ----- 81  
DSSP -----

DSSP eeeee1hhhh11111leeee1LHHHHHHHHHHHH111111111LHHHHHHHHHH  
Query dtltsdalglvgvpaavavpcxTIPWQIAQKLHAVtavleepkandRAHDLVDLQLEGL 217  
ident  
Sbjct -----gsldqk1ALATRIRGHVLP-----alQMYGCRVIQKALES 117  
DSSP -----11hhhhHHHHHHLLHHHH-----hhLLLHHHHHHHHHH

DSSP LLHHHHhhHHHHHHhhhhhh1111LLL11111hhhhhhhh111111111hHHHHH  
Query LLDAD1xPTRSACiaifearaqhpWPPRvatlphwpliyagalegldhlelartvDAAAQ 277  
ident  
Sbjct ISSDQ--QVISEM-----vke1DGHV-----1kcvkDQNGN 146  
DSSP LLLL--HHHHH-----hh11LLLH-----hhhhL111H

DSSP HHHHHHHhhHLLL-----  
Query AVQRFVARidRATK----- 291  
ident  
Sbjct HVVQKCI EcvQPQSlqfiidafkgqvflsthygcrvigrilehctaeqtlpileelhq 206  
DSSP HHHHHHHhh1LHHHHhhhhhh1111hhhh1111hhhhhhhhhh11hhhhhhhhhh

DSSP -----  
Query ----- 291  
ident  
Sbjct hteqlvqdqygnvviqhvlehgrpedkskivseirgkvalalsqhkfasnvvekvthasr 266  
DSSP 1hhhh11111hhhhhhhhhh11hhhhhhhhhh111hhhh1111hhhhhhhhhh11h

DSSP -----  
Query ----- 291  
ident  
Sbjct aerallidevccqndgphsalytmkdkqyanyvvqkmidmaepaqrkiimhkirphittl 326  
DSSP hhhhhhhhhhh11111111hhhhhh1111hhhhhhhhhh11hhhhhhhhhhhhhhhh

ident  
Sbjct rkytyghilakleky 343  
DSSP hhlhhhl1hhhhhh111

No 754: Query=mol1A Sbjct=1f7uA Z-score=2.1

[back to top](#)

```
DSSP 11111111LLHHHHHHHHHHHH-----hhh1LLLHHHHHHHHHHHHHHHHHH1111
Query aapysspTNLRSLRDRLTQ-----vaerqGVVFGRLQRHVXIVVAQFAAAtltd 51
ident
Sbjct -----ASTANMISQLKk1siaepavakdshpDVNIVDLMRNYISQELSKISG----- 47
DSSP -----LHHHHHHHHHHHH1111hhhh1111LLLHHHHHHHHHHHHHHHHH-----
```

```
DSSP 1111111111LHHHHHHHHHH11111111LLE-----EEEEL-LLHHHHHHHH
Query tgap111vkqgsslelrrgipdsrtSKDF-----ATVAR-RDIELIHEQ 94
ident
Sbjct -----vdssliFPALewntmergdllipRRLRIKGANPKDLAVQ 88
DSSP -----l1hhhhHHHLeell1hhhh1leeeehHLLLL1LLHHHHHHHH
```

```
DSSP HHHHHhhL1111-eeEEEELEell11111111leEEEEEE-----
Query LADAGetGWEG-ftAIFTAPEeiaagxpvkprRFTAKLS----- 133
ident
Sbjct WAEKF--PCGDfleKVEANG-----PFIQFFFnpqflaklvipdiltrkedy 133
DSSP HHLL--LLLleeEEEEEL-----LEEEEElhhhhhhhhhhhhhhhhhh
```

```
DSSP -----
Query ----- 133
ident
Sbjct gscklvenkkviefsspniakpfhaghrstiiggflanlyeklgwevirmnylgdwgk 193
DSSP 111111111111111111111111111111111111111111111111111111111111
```

```
DSSP -----ell
Query -----yrg 136
ident
Sbjct qfgllavgferygneealvkdpihhlfdvyrinkdieegdsipleqstngkareyfr 253
DSSP hhhhhhhhhhhhh1lhhhhhh1hhhhhhhhhhhhhhhhhhhh111111hhhh1lhhhhhhhh
```

```
DSSP eeeeeeeeeell11111111eeeeellhhhh11111111eeeeellhhhhhhhhhhhh111
Query rafatvpievssveagnadqfdt1tsdalglvgvpaavpcxtipwqiaqklhavtavl 196
ident
Sbjct medgdealkiwrkrefsiekyidtyarlnikydvysgesqvskesmlkaidlfkekgl 313
DSSP hhh1lhhhhhhhhhhhhhhhhhhhhhhhhhhhhhh11111111111111111111111111
```

```
DSSP 1111111111hhhhhhhhhhhh1lhhhhhhhhhhhhhhhhhhhh111111LLL-----
Query eepkandrahdldvlqllleglldadlxptrsaciaifearaqhwpPRVA----- 247
ident
Sbjct thedkgavlidltkfnkklgkaivqksdgttlyltrdvgaamdryekYHFDkmiyviasq 373
DSSP eeeell11111111111111111111111111111111111111111111111111111
```

```
DSSP -----LLL-----
Query -----TLP----- 251
ident
Sbjct qdlhaaqffeilkqmgfewakDLQHvnfgmvqgmstrkgtvflnileetkekmhevkm 433
DSSP hhhhhhhhhhhhh1111111111111111111111111111111111111111111111111
```

```
DSSP -----
Query ----- 251
ident
Sbjct knenkyaqiehpceedlvgisavmiqdmqgkrinnyefkwerm1sfegdtgpylqyahs 493
DSSP 1lhhhh11111111111111111111111111111111111111111111111111111
```

```
DSSP -----hhhhhhhHLLL-LLLLLLL-----
Query -----wpliyagaLEGL-DHLELAR----- 270
ident
```

DSSP -----lhhhhhhhhhhhhhhhh1111  
Query -----tvdaaaqavqrfvaridratkr 292  
ident  
Sbjct fklthqvsscylvlvagqteelatarlalygaarqvlngmrl1gltpvermr 607  
DSSP hhhhhhhhhhh111111hhhhhhhhhhhhhhhhhhhhhhhhhh11111111

No 755: Query=mol1A Sbjct=5emwA Z-score=2.1

[back to top](#)

DSSP 1111111111hhhhhhhhhhhh1111hhhhHHHHHHhhhhHHHH1LLL-----L  
Query aapyspntlrsldr1tqvaerqgvfgrlQRHVAXivvaQFAAtLTDD-----T 52  
ident  
Sbjct -----tiASSRL---r1LEYS-AFMEvqrpdptyS 26  
DSSP -----11LLLLL---eeEEEE-EEEEeeee1leeE

DSSP LLLLEEehhhhhhhhh11LLLLL-----LLEEEEE  
Query GAPLLLVkkgsslelrrgiPDSRTS-----KDFATVA 84  
ident |  
Sbjct KHLFVH-----igPPEAVdvrqiydkfpekkglkelyekgppnafFLVKFWA 75  
DSSP EEEEE-----e1LLEEEehhh1hhh111111hhhhhh11hhheEEEEEE

DSSP LL-----lhhhhhhhhhhhh11LLEEEEEELLEE-----  
Query RR-----dieliheqladagetgwEGFTAIFTAPEE----- 115  
ident  
Sbjct DLnstiqegpgafygvssqyssadsMTISVSTKVCsfGkqvveteyarlengrfvyr 135  
DSSP LL1111111111eeeeeeee111LLEEEEEEEEL1eeeeeeee1ee11eeee

DSSP -----111LLLLL---1EEEEEEEEEL--LEEEEEEEEEEEELL  
Query -----iaaPGXPVK---pRRFTAKLSYR--GRAFATVPIEVSSVEA 151  
ident |  
Sbjct ihrspxeyminfiHklkhlPEKYMNSv1enFTILQVVTsRdsQETLLVIAFVFEVSTS 195  
DSSP eeeel1hhhhhhhhhh111LHHHHHHhh11EEEEEEEEEL11LLEEEEEEEEEELL

DSSP LLL111eeeeelhhhh111111eeeeelhhhhhhhhhh1111111111hhhhhh  
Query GNAdqfd1tsdalglvgpaavavpcxtipwqiaqklhavtavlepkandrahd1vd1 211  
ident  
Sbjct EHG----- 198  
DSSP LLL-----

DSSP hhhhh11hhhhhhhhhhhhhhhh111111111111hhhhhhhh1111111111  
Query qlleg11dadlxptrsaciaifearaqhpwprvat1phwplyagalegldhlelart 271  
ident  
Sbjct ----- 198  
DSSP -----

DSSP hhhhhhhhhhhhhhh1111  
Query vdaaaqavqrfvaridratkr 292  
ident  
Sbjct -----aqhhvyklvk 208  
DSSP -----leeeeeee1

No 756: Query=mol1A Sbjct=3hbzA Z-score=2.1

[back to top](#)

DSSP 1LLLLL11hhhhhhhhhhhh1111hhhhhhhhhhHHHHhHLLL1111LLE-EE  
Query aAPYSSPPt1rsldr1tqvaerqgvfgrlqrhvaxiVVAQfaATLTddtgAPLL-LV 59  
ident |  
Sbjct -GREEAPN-----aeaDILS--CRLP---GVVxtTS 25  
DSSP -LLLLL-----111LEE--EELL---LLLL1L

DSSP EHhhhhhhhh11111111LLEEEEL--LLHHhhHHHHhhhhHLLLLEEEEl1lee11





```
DSSP hHHHHHHHHHHHH11111111LLHH-HHHHHHHHHHL1hhHHHHHHHHHHHHHHL-
Query iPWQIAQKLHAVTavleepkandRAHD-LVDLQLEGLLL1dadLXPTRSACIAIFEARA- 238
ident  | | | | |
Sbjct eSHQLFAAIVRGE-----1EDSQIAAALISMKMRG---eRPEEIAGAASALLADAq 66
DSSP hHHHHHHHHHHLLL-----1LHHhhHHHHHHHHHHHL---1LHHHHHHHHHHHHHHL
```

  

```
DSSP -----
Query ----- 238
ident
Sbjct pfprpdydfadivgtggdgtnsinistasafvaascgakvakhgnrsvlagscdllqafg 126
DSSP 11111111leeeee1111111111hhhhhhhhhh1111leeeee11111111hhhhhhhh
```

  

```
DSSP -----LLLL-1LLL1111hhhhhhhh11111111
Query -----QHPW-pPRVAtlphwpliyagalegldhlelar 270
ident
Sbjct irlmsaedsrqalddlnvcflfapqyHTGFrhAMPV----- 163
DSSP 1111111hhhhhhhhhhleeeehhhLHHhhHHH-----
```

  

```
DSSP 1hHHHHHHhhHHHHHH-----LLL-----
Query tvDAAQAqRfVVARIDR-----ATKR----- 292
ident
Sbjct -rQQLKTR--TIFNVLGPlinparppkalgvypelvPIAQAkvlgyknaavvhggg 220
DSSP -hhHLLL--LHHHHHH111111leeeee11hhhhHHHHhh1111leeeee11
```

  

```
DSSP -----
Query ----- 292
ident
Sbjct mdevaihtptqvaelngeiesyqlspqdfqlsyslnalqggtpoenrdilarllqgkg 280
DSSP 11111111leeeeee1leeeeee1hhhh111111hh1111hhhhhhhhhh1111
```

  

```
DSSP -----
Query ----- 292
ident
Sbjct daaharqvaanvallklfgqdnlrhnaqlaletirsgtafervtalaar 330
DSSP 1hhhhhhhhhhhhhh1111hhhhhhhhhh11hhhhhhhh11
```

No 760: Query=mol1A Sbjct=3l7tA Z-score=2.1

[back to top](#)

```
DSSP 11111111hhhhhhhhhhhh11LLHHhhhhhhhhhhhh11111111leeee
Query aapyspptnlrslrdrltqvaerqVVFGr1qrhvaxivvaqfaatltddtgap11lvk 60
ident
Sbjct -----KLKA----- 4
DSSP -----LLE-----
```

  

```
DSSP hhhhhhh1111111LLEEEEE11HHHHHHHH-HHHhh1111eeEEELLEELL1
Query ggsslelrrgipdsrtsKDFATVArrdIELIHEQL-ADAGetgwegftAIFTAPEEIAAp 119
ident | |
Sbjct -----vhhVALIVSD---YDKSYEFYvNQLG-----FEVIRENHRPK- 38
DSSP -----eeeEEELL---HHHHHHHHHL---LEEEEEEEEL---
```

  

```
DSSP 1111LLEEEEEEEleeeEEEEEEEEEL--111111LEEE-----eelhhhhLL
Query gxpvrPRRFTAKLSyrgRaFATVP1EVSSV--eagnadqFDTL-----tsdalglVG 169
ident | |
Sbjct ---rHDYKLDLKCg----DIELEIFGNKltdsnycappERISwpreacgrhlaifyvED 90
DSSP ---1LEEEEEEEEL---LEEEEEEEELL11111111LLL11111leeeeee1LL
```

  

```
DSSP LL-----LLEEe11hhhhhhhhhh11111111
Query VP-----AAVAVpcxtipwqiaqlhavtaveepkandr 204
ident | |
Sbjct VEasrqelialgirveevrydytgkkMAFFF----- 122
DSSP HHHhhhhhhhh111111le1111leEEEE-----
```





DSSP -----  
Query ----- 292  
ident  
Sbjct eglekienlqshdndndiydkavkiletftw 407  
DSSP lhhhhhhhhhhllllhhhhhhhhhhhhhhll

No 762: Query=mol1A Sbjct=3s4kA Z-score=2.1

[back to top](#)

DSSP -----111111111hhHHHHHHHHhhhh1LLLHhhHHHHHHHHHHHHhh111  
Query -----aapyspntnlrsLRDRLTqvaerqGVVfgrLQRHVAXIVVAQFaatl 49  
ident  
Sbjct vpfdselglqftelgpdgaraqlVVRPKLL-----qLTGV--VHGGVYCAMIESI----- 48  
DSSP lhhhhhh1leeeeeleeeeeELHHL-----1LLL--LLHHHHHHHHHH-----

DSSP 111111leeehhhhhhhh11111111leeeeLLHhhhhhhhhhhhh11LEEEE  
Query ddtgaplllvkgslelrrgipdsrskdfatvaRRDIeliheqladagetgweGFTAI 109  
ident  
Sbjct -----asmaafawlInsegGSVV-gvnntdfvrsissgMVYGT 85  
DSSP -----hhhhhhhh1111LEEE-eeeeee111111eEEEE

DSSP ELLLEEL111111LLEEEEEEEEL-LEEEEEEEEEELLLL11111leeeelhhhh1  
Query FTAPEElaapxpVKPRRFTAKLSYR-GRAFATVPIEVSSVEAGnadqfdtltsdalglv 168  
ident  
Sbjct AEPLHRG-----RRQLWLVITDDtDRVARGQVRLQLEAR----- 123  
DSSP EEEEEEL-----LLEEEEEEEEL11LEEEEEEEEEELLL-----

DSSP 1111leeeel1hhhhhhhhhh1111111111hhhhhhhhhh11hhhhhhhh  
Query gvpaavavpcxtipwqiaqklhavtavleekandrahdldlqllegllldadlxptrs 228  
ident  
Sbjct ----- 123  
DSSP -----

DSSP hhhhhhhhh111111111111hhhhhhhhhh1111111111hhhhhhhhhhhhhhhh  
Query aciaifearaqhpwprvatlphwpliyagalegldhlelartvdaaaqavqrfvaridr 288  
ident  
Sbjct ----- 123  
DSSP -----

DSSP 1111  
Query atkr 292  
ident  
Sbjct ---p 124  
DSSP ---l

No 763: Query=mol1A Sbjct=5dqqA Z-score=2.1

[back to top](#)

DSSP 111111111hhhhhhhhhhhh1111hhhhhhhhhhhhhh11111111leeee  
Query aapyspntnlrsldrLTqvaerqGVVfgrLQRHVAXIVVAQFaatltdtgaplllvk 60  
ident  
Sbjct ----- 0  
DSSP -----

DSSP hhhhhhhhh11111111leeeel1hhhhhhhhhhhh111leeeel1le1111  
Query ggsslelrrgipdsrskdfatvarrdieliheqladagetgwegftaiftapeeiaapg 120  
ident  
Sbjct ----- 0  
DSSP -----

DSSP 1111leeeeeeeleeeeeeeeeel11111111leeeel1hhhh11111leeeEEL  
Query xpvkprftaklsyrgrafatvpiEVSSVEAGnadqfdtltsdalglvgvpaavavpCXT 180









```

DSSP -----
Query ----- 292
ident
Sbjct qgttywnpkndfsydgllpttstvtntvtnipvydngvkvgfngnep 613
DSSP 1111111hhhhhhhh1111111lee1111leee1leeee1111

```

No 767: Query=mol1A Sbjct=3chlA Z-score=2.0

[back to top](#)

```

DSSP -----
Query ----- 0
ident
Sbjct tgvtavvqkvveacqdeskrldlieiarsyppnqlrnmqrtfqaitgtfldaf1kkh1sk 60
DSSP 1111111hhhhhhhhhh1111111hhhhhhhh1111111hhhhhhhhhh1111111hhhhhhhh111

```

```

DSSP -----1111111111hhhhhhhhHHHHHLL
Query -----aapyspptnlrslrdr1tQVAERQGVV 28
ident
Sbjct dfeslvmlmlykpraql1celirgatkgagtdekclvdvlltiethvrireirQLYYQLYND 120
DSSP hhhhhhhhh1111111hhhhhhhhhh1111111hhhhhhhh1111111hhhhhhhhHHHHHLL

```

```

DSSP HHHHHHHHHHH-----HHHH-----hh1111111111eeehhhhhhhhh1111
Query FGRLQRHVAXI-----VVAQ-----faat1tDDTGApl1lvkggss1elrrgipds 74
ident
Sbjct SLGDVVRKDCGdkymwAKLInavatgdriprdtheLEEDL----- 160
DSSP LHHHHHHHHHLL111hhHHHHhhhh1111111hhHHHHHH

```

```

DSSP 1111leeeee111hhHHHHHHHH-----hhh1111leeeee111ee111111LLEee
Query rtskdfatvarrdiELIHEQLAD-----agetgwefgtaitapeeiaagxPVKPRrf 128
ident
Sbjct ---vlvrkaiekGVKKDEVSTwirifatytradfrqlhkmysakyngds1rAGVED-- 214
DSSP ---hhhhhhhh1111LHHHHHHhhhhhh1111111hhhhhhhhhh1111111hhHHHHHH--

```

```

DSSP eeeeeelleeeeeeEEEEel1111111leeeelh1111111leeeELLHHHHHHHH
Query taklsyrgrafatvpIEVSSveagnadqfdtltsdalglvgpaavavpCXTIPWQIAQK 188
ident
Sbjct -----efqglDEYA-----fklahdfLYDPCCAAAFS 241
DSSP -----h11hhHHHH-----hhhhhhHLLHHHHHHHH

```

```

DSSP HHHHLL11111111LLHH-HHHHHHHHHHH11hhhhHHHHHHHHHHhh1111LL-LL
Query LHAVTAV1leepkANDRAH-DLVDLQLEGLLldadlxPTRSACIAIFEaraqhpWPP-RV 246
ident
Sbjct MNVAFAG-----SGSDSNrLNRITAMHFREC-----kGCKYKKKVVY-----QAFDeRC 286
DSSP HHHHLL-----LLLLHhHHHHHHHLL-----1LHHHHHHHHHLL-----LLHhHH

```

```

DSSP LL1111hhhhhhhh1111111111HHHHHHHHHHHHHH-----hhh1111
Query AT1phwpliyagaleglhdlelartVDAAAQAVQRFVAR-----idratkr 292
ident ||
Sbjct AT-----e1KGVYGDAIKLLWEPvtvp11smddy 315
DSSP HH-----h1LHHHHHHHHHLL1111111111

```

No 768: Query=mol1A Sbjct=3nowA Z-score=2.0

[back to top](#)

```

DSSP -----
Query ----- 0
ident
Sbjct naktstkvqmmldtfdlatpidkrraannlvvlakeqtgaellykdhciakvas1tkv 60
DSSP 1hhhhhhhhhhhhhh1111111hhhhhhhhhhhh1111111hhhhhhhhhh1111111hhhhhhhhhh

```

```

DSSP -----

```

DSSP 111hhhhhhhhhhhhhh111hhhhhhhhhh111hhhhhhhh11111hhhhhhhhhhhh  
DSSP -----  
Query ----- 0  
ident -----  
Sbjct nalsglknkpdskpdkelctrnreidtlctlvysitdrtisgaardgvielitrnvhy 180  
DSSP hhhh1111111111hhhhhhhhhhhhhh11111hhhhhhhhhhhhhh111

DSSP -----  
Query ----- 0  
ident -----  
Sbjct talewaerlveirglcrllldvcseledykyesamditgssstiasvclariyenmyydea 240  
DSSP 1111hhhhhhhh11hhhhhhhhhh1111111111111111hhhhhhhhhhhhhh1111hh

DSSP -----  
Query ----- 0  
ident -----  
Sbjct karftdqideyikdkllapdmeskrvtvaitalngpldvgnqvaregilqmilat 300  
DSSP hhhhhhhhhhhhhhh1111hhhhhhhhhhhhhh1111hhhhhhhh111hhhhhhhh

DSSP -----  
Query ----- 0  
ident -----  
Sbjct tddelqqrvicecliaasskkdkakalceqgvdkrlyhskndgirvralvglcklgsy 360  
DSSP 111hhhhhhhhhhhh111hhhh11hhhhhhhhhh11111hhhhhhhhhhhhhh111

DSSP -----11111111LHHHHHHHHHHH-----  
Query -----aapyspptNLRSLDRDLTQVA----- 22  
ident -----  
Sbjct ggqdaairpfgdgaalkaeacrflkpgkdkdiRRWAADGLAYLTLdaeckekliedk 420  
DSSP 11111111111hhhhhhhhhhhh111111hHHHHHHHHHHLL1hhhhhhhhhh

DSSP -----hh11LHHH-----  
Query -----erqgvVFGR----- 31  
ident -----  
Sbjct asihalmdlarggnqsclygvvtfVNLCnayekqemplemielakfakhipeeheldd 480  
DSSP hhhhhhhhhhh11hhhhhhhhhhHHLL1111111111hh11111111111hh

DSSP -----hhhhHHHHHHhHHHH1111111111eeehhhhhhhhhLLLL---  
Query -----lqrhVAXIVVaQFAAtlddtgap111vkgsslelrrGIPDS--- 74  
ident -----  
Sbjct vdfinkritvlanegittALCALA-KTES-----hnsqeliarvNAVCGlke 527  
DSSP hhhhhhhhhhh11hhhhHHHHH-LLLL-----hhhhhhhhhhHHHHLLhh

DSSP -----11111EEEE11hhhhhhhhhhhh1111111111eeeee111e111111111  
Query -----rtskdFATVarrdieliheqladagetgwegftaiftapeeiaapgpxvk 124  
ident -----  
Sbjct lrgkvvqeggvkal1RMAL----- 546  
DSSP hhhhhhh11hhhhhhHHHH-----

DSSP leeeeeeeelleeeeeeeEEEE1111111111111111111111111111111111111111  
Query prrftaklsyrgrafatvpiEVSSveagnadqfdtldsda1glvgpaavavpcxTIPWQ 184  
ident |  
Sbjct -----EGTE--kgkrhatqalarigitinpevsfsgqrs1DVIRP 584  
DSSP -----LLLH--hhhhhhhhhhhhhh11hhhh111hhhhLHHHH

DSSP HHHhhhhhh111111111111LLH--HHHHHHHHHH11hhHHHHHHHHHHHHhh111111  
Query IAQ1havlavleepkaNDRAH-DLVDLQLEGI111daDLXPTRSACIAIFearaqhpwp 243  
ident | | | |  
Sbjct LLNL-----1qqDCTALeNfESLMALTN--lasMNESVRQRIKEQ---gvski 628  
DSSP HHHL-----1111111111111111111111111111111111111111111111111111

DSSP LLLL111hhhhhhhh1111111111111111111111111111111111111111111111111  
Query PRVAT1phwplyagaleglhdh1artVDAAAQAVQRFVAR1DRATK----- 291  
ident |  
Sbjct EYYLM-----edHLYLTRAAQCLCNLMVSEdVikmfegnndrv 667



DSSP -----1  
 Query -----r 291  
 ident  
 Sbjct kflallicededeetatacagalaiitsvsvkcekilaiaswldilhtlianpspavqhr 727  
 DSSP hhhhhhhhh111hhhhhhhhhhhhhhhh11hhhhhhhh1111hhhhhhhhhh1111hhhhhhhh

DSSP -----1  
 Query -----r 292  
 ident  
 Sbjct giviilnminageeiakklfetdimellsglqlpddtrakarevatqclaaeryrii 786  
 DSSP hhhhhhhhh111hhhhhhhh11hhhh1111111111hhhhhhhhhhhhhhhhhh11

No 769: Query=mol1A Sbjct=3tb5A Z-score=2.0

[back to top](#)

DSSP 1111111111hhhhHHHHHHhhhhhh1111hhhhhhHHHHHHHHHHHHLL111111LLEEe  
 Query aapysspptnlrslRDRLtqvaerqgvfgrlqrHVAXIVVAQAATLtddtgaPLLLvk 60  
 ident  
 Sbjct -----mitlKSPR-----eiemmDESCELLADVHRHL-----rTFIK-- 32  
 DSSP -----1111LLHH-----hHHHHHHHHHHHHHHHHHH-----hHLL--

DSSP hhhhhhhhh1111111111eEEELLLHHHHHHHHHHHHHHLL1LEEE-----eEL  
 Query ggsslelrrgipdsrtskdfatvarRDIELIHEQLADAGETGweGFTA-----iFT 111  
 ident  
 Sbjct -----pgITSWDIEVVFVRDFIESH--GGVAaqigygykyAT 67  
 DSSP -----11LLHHHHHHHHHHHHHHHHLL--LLEE1111hh111LE

DSSP LLEELL-----1111LLLEEEEEEEEEEL1EEEEEEEEEEEEEL111111leeee  
 Query APEEIA-----apgXPVKPRRFTAKLSYRgRAFATVPIEVSSVEagnadqfdtlts 162  
 ident  
 Sbjct CCSINDeichgfprkkvIKDGLIKVDMCVDLK-GAISDCSWSYVGE----- 114  
 DSSP EEEELLee1111111111LLLEEEEEEEEEEL-LEEEEEEEEEL--

DSSP lhhhh111111eEEELlhhhhHHHHHHh1111111111hhhhhhhhhh11hh  
 Query dalglvgvpaavpcxtipwqiaQKLHAVtavleepkandrahdldvdlqllleglildad 222  
 ident  
 Sbjct -----sTPEIDR----- 121  
 DSSP -----1LHHHH--

DSSP hhhhhhhhhhhhhhh111111111111hhhhHHHH-----  
 Query lxptrsaciaifearaqhpwpprvatlphwplyAGAL----- 260  
 ident  
 Sbjct -----lmevtkkalylgieaqvgnrigdighAIQTyvegegygvvrdfvghgigpti 174  
 DSSP -----hhhhhhhhhhhhhh111111hhhhHHHHhhhh11lee1111lee1111

DSSP -----LLLLLL-----1111h  
 Query -----EGLDHLE-----lar tv 272  
 ident  
 Sbjct hespmiphYGEAGKGlrlkegmvitiepmvntgtwrmkmdpngwtaytedgglsqyehs 234  
 DSSP leeeel1111111111111111eEEel1111lee1111lee1111lee1111lee1111lee

DSSP hhhhhhhhhhhhhhh1111  
 Query daaaqavqrfvaridratkr 292  
 ident  
 Sbjct laitkegpriltsqgeelty 254  
 DSSP eel1111lee1111111111

No 770: Query=mol1A Sbjct=2opdA Z-score=2.0

[back to top](#)

DSSP 1111111111hhhhHHHHHHhhhh1111hhHHHHHHHHHHHHLL111111LLEEe  
 Query aapysspptnlrslrDRLTqvaerqgvfgrLQRHVAXIVVAQAATLtddtgAPLLlvk 60





```
DSSP -----h h h h h h h h h h h h h h h l l l l
Query -----q r f v a r i d r a t k r   292
ident
Sbjct vmkhriseanqqadeflislghn   416
DSSP h h h h h h h h h h h h h h h h h h h h h h l
```

No 773: Query=mol1A Sbjct=3nmzB Z-score=2.0

[back to top](#)

```
DSSP -----L L L L L-----1 l l l h h H H H H H H
Query -----A A P Y S S-----p p t n l r S L R D R L   18
ident
Sbjct dkddsrtllamsssqdsciSMRQSGclp1liqllhgndknrsgskeararasaALHNII   60
DSSP 1 l h h h h h h h h h h h h l l l l l h H H H H H L h h h h h h h h h h l l l l l l l l l l h h h h h h h h h H H H H H H
```

```
DSSP H H ---h h H H L L L H H H H H H H H H H H H H L L L---L L L L-----
Query T Q ---v a E R Q G v V F G R L Q R H V A X I V V A Q F A A T L---T D D T-----   52
ident
Sbjct HSqpd dk R G R R-E I R V L H L L E Q I R A Y C E T C W E W q e A H E P g m d q k n p a p v e h q i c p a v c v   119
DSSP L L l l l l h H H H H H---H H H H H H H H H H H H H H H H h H L L L l l l l l l l l l l l l h h h l h h h h h h
```

```
DSSP -----1 l l l e E E E H-----H H H H H H H H L l l l l
Query -----g a p l l L V K G-----G S S L E L R R G i p d s   74
ident
Sbjct l m k l s f d e e h r h a m m e l g g l q a i a E L L Q v d c e m y g l t n d h y s i t l r r Y A G M A L T N L----   175
DSSP h h h h l l l h h h h h h h h l l h h h h h h H H H H H H h h h h l l l l l l h h h h h h h H H H H H H H H H---
```

```
DSSP 1 l l l l e e e e e l l l h h h h h h h h h h h h l l l l l e e e e e l l e e l l l l l l l l l e e e e e e e e
Query r t s k d f a t v a r r d i e l i h e q l a d a g e t g w e g f t a i f t a p e e i a a p g x p v k p r r f t a k l s y   134
ident
Sbjct -----   175
DSSP -----
```

```
DSSP 1 l e e e e e e e e e e e l l l l l l l l l e e e e l h h h h l l l l l e e e e e L H H H H H H h H H H H H h h l
Query r g r a f a t v p i e v s s v e a g n a d q f d t l t s d a l g l v g p a a v a v p c X T I P W Q I a Q K L H A v t a   194
ident
Sbjct -----t f g d v a n k a t l c s m k G C M R A L V - A Q L K S---   202
DSSP -----h l l l h h h h h h h h h l h H H H H H H H---H H H L---
```

```
DSSP 1 l l l l l l l L L L H H H H H H H H H H H H L---1 H H H H H H H H H H H h h h h h h h l l l l l L L L L l l
Query v l e e p k a n D R A H D L V D L Q L L E G L L---1 D A D L X P T R S A C i a i f e a r a q h p w p P R V A T l p   250
ident
Sbjct -----E S E D L Q Q V I A S V L R N L s w r a d V N S K K T L R E V G-----s v k a l m E C A L E---   245
DSSP -----L L H H H H H H H H H H H H H H H H H H H H H H H H H H L---h h h h h h H H H L---
```

```
DSSP 1 h h h h h h h h h h l l l l l l l l l L H H H H H H H H H H H H H H H L L L L-----
Query h w p l i y a g a l e g l d h l e l a r T V D A A A Q A V Q R F V A R I D R A T K R-----   292
ident
Sbjct -----v K K E S T L K S V L S A L W N L S A H C T E n k a d i c a v d g a l a f l v g t   286
DSSP -----1 L L H H H H H H H H H H H H H L L L L H H H h h h h h h h h h l l l h h h h h h h h
```

```
DSSP -----
Query -----   292
ident
Sbjct l t y r s q t n t l a i e s g g i l r n v s s l i a t n e d h r q i l r e n n c l q t l l q h k s h s l t i v s n   346
DSSP 1 l l l l l l l l l l h h h h h h h h h h h h h h h h h l l l h h h h h h h h l l h h h h h h h h l l l l h h h h h h
```

```
DSSP -----
Query -----   292
ident
Sbjct a c g t l w n l s a r n p k d q e a l w d m g a v s m l k n l i h s k h k m i a m g s a a a l r n l m a n r   400
DSSP h h h h h h h h l l l l h h h h h h h h l l l l l l l l l h h h h h h h h h h h h h h h h h h h h h l l l l
```
